# Supplementary material for: NCOA4-Mediated Ferritinophagy Is a Pancreatic Cancer Dependency via Maintenance of Iron Bioavailability for Iron–Sulfur Cluster Proteins
Source: Oxford University Press journal article supplement (doi:10.1158/2159-8290.cd-22-0043), 2022-06-30
Supplement: cd-22-0043_supplementary_table_1_suppst1.xlsx [file cd-22-0043_supplementary_table_1_suppst1.xlsx]

## Sheet: Fig4_Proteome
Protein Id	Gene Symbol	Description	Group ID	Number of peptides	CON1_sn sum	CON2_sn sum	CON3_sn sum	CON4_sn sum	DFX1_sn sum	DFX2_sn sum	DFX3_sn sum	CQ1_sn sum	CQ2_sn sum	CQ3_sn sum	sgNCOA4-1-1_sn sum	sgNCOA4-1-2_sn sum	sgNCOA4-1-3_sn sum	sgNCOA4-2-1_sn sum	sgNCOA4-2-2_sn sum	sgNCOA4-2-3_sn sum	Log2FC(sgNCOA4-1/CON)	negLog10(p-val sgNCOA4-1/CON)	qval(sgNCOA4-1/CON)	sgNCOA4-1/CON Welch's T-test Significant: S=0, FDR=5%	Log2FC(sgNCOA4-2/CON)	negLog10(p-val sgNCOA4-2/CON)	qval(sgNCOA4-2/CON)	sgNCOA4-2/CON Welch's T-test Significant: S=0, FDR=5%	Log2FC(DFX/CON)	negLog10(p-val DFX/CON)	qval(DFX/CON)	DFX/CON Welch's T-test Significant: S=0, FDR=5%	Log2FC(CQ/CON)	negLog10(p-val CQ/CON)	qval(CQ/CON)	CQ/CON Welch's T-test Significant: S=0, FDR=5%
sp|Q9NQ94|A1CF_HUMAN	A1CF	APOBEC1 complementation factor OS=Homo sapiens OX=9606 GN=A1CF PE=1 SV=1	4754	10	539.397	537.577	585.785	579.545	505.825	476.772	500.237	589.66	613.785	549.837	606.332	631.072	582.401	548.463	630.307	620.864	0.114197	1.21009	0.207213		0.0961311	0.568547	0.48195		-0.180928	2.10974	0.0238844	+	0.0597626	0.450064	0.734579
sp|P01023|A2MG_HUMAN	A2M	Alpha-2-macroglobulin OS=Homo sapiens OX=9606 GN=A2M PE=1 SV=3	4759	2	79.6058	80.5096	92.2212	81.1228	171.108	85.497	73.0551	77.4539	132.19	73.9895	76.0852	64.5856	69.9451	81.5492	147.278	94.3306	-0.24846	1.36635	0.165656		0.325145	0.479096	0.547317		0.297088	0.288834	0.644932		0.13159	0.170697	0.911311
sp|Q9NRG9|AAAS_HUMAN	AAAS	Aladin OS=Homo sapiens OX=9606 GN=AAAS PE=1 SV=1	4044	4	82.359	84.8101	81.3751	82.4736	75.2525	76.8239	86.9175	87.1561	86.3972	83.0292	79.9966	72.4478	69.7576	74.3257	80.6505	82.0099	-0.16226	0.981331	0.283079		-0.068223	0.591598	0.467515		-0.0576901	0.328559	0.603866		0.0473978	0.841012	0.523217
sp|Q86V21|AACS_HUMAN	AACS	Acetoacetyl-CoA synthetase OS=Homo sapiens OX=9606 GN=AACS PE=1 SV=1	3445	5	441.609	432.449	441.34	455.854	448.939	449.26	443.111	455.681	470.166	467.695	467.279	463.112	460.056	488.013	501.767	487.602	0.0660445	1.73915	0.105179		0.15344	3.14128	0.0229247	+	0.0141389	0.344259	0.587668		0.069147	1.65941	0.216996
sp|Q8N5Z0-2|AADAT_HUMAN	AADAT	Isoform 2 of Kynurenine/alpha-aminoadipate aminotransferase, mitochondrial OS=Homo sapiens OX=9606 GN=AADAT	8214	1	58.8331	80.8877	82.3532	69.4118	53.7867	68.3498	64.7247	73.5798	82.9814	63.2245	71.4384	88.7232	82.5205	77.2225	74.5298	93.5588	0.157866	0.484142	0.56258		0.171849	0.507858	0.522894		-0.220888	0.67387	0.301478		0.0118053	0.0249213	0.987911
sp|Q6PD74|AAGAB_HUMAN	AAGAB	Alpha- and gamma-adaptin-binding protein p34 OS=Homo sapiens OX=9606 GN=AAGAB PE=1 SV=1	2965	2	330.854	335.823	366.213	353.823	321.419	303.835	301.778	366.693	366.491	365.035	345.967	367.891	349.296	362.883	344.176	347.22	0.032386	0.308501	0.711853		0.0204321	0.192367	0.793608		-0.165325	1.8603	0.0353575	+	0.0797268	1.00133	0.453951
sp|Q2M2I8|AAK1_HUMAN	AAK1	AP2-associated protein kinase 1 OS=Homo sapiens OX=9606 GN=AAK1 PE=1 SV=3	160	5	304.891	279.129	326.233	338.252	323.627	306.838	321.155	336.389	328.06	320.027	321.655	348.266	333.879	363.72	340.151	375.12	0.10337	0.69167	0.415037		0.207145	1.40988	0.162781		0.0267196	0.151846	0.812826		0.0757879	0.508626	0.7025
tr|A0A096LP25|A0A096LP25_HUMAN	AAK1	AP2-associated protein kinase 1 (Fragment) OS=Homo sapiens OX=9606 GN=AAK1 PE=1 SV=1	160	2	260.842	276.811	288.775	279.482	257.874	255.75	266.416	278.368	255.09	273.428	297.169	292.181	306.579	294.347	304.251	329.8	0.11194	1.52461	0.136145		0.161929	1.2544	0.196559		-0.0878343	1.21871	0.108693		-0.0398078	0.336303	0.812192
tr|E9PR47|E9PR47_HUMAN	AAMDC	Mth938 domain-containing protein OS=Homo sapiens OX=9606 GN=AAMDC PE=1 SV=1	6246	2	462.006	482.746	466.214	471.979	541.195	486.235	484.295	455.583	453.613	428.133	538.569	520.435	549.84	514.643	533.381	532.792	0.187898	2.3933	0.0532464		0.162714	2.87458	0.0377313	+	0.0965067	0.695233	0.289202		-0.0789777	1.03176	0.444335
tr|C9JEH3|C9JEH3_HUMAN	AAMP	Angio-associated migratory cell protein OS=Homo sapiens OX=9606 GN=AAMP PE=1 SV=1	2905	4	328.72	311.758	319.697	336.919	325.055	271.633	286.22	337.321	331.77	323.392	330.125	316.565	304.994	321.764	335.905	329.608	-0.0318332	0.318058	0.703223		0.0216709	0.29636	0.698392		-0.143443	0.70835	0.280852		0.0292649	0.425646	0.751472
tr|A2A2Q9|A2A2Q9_HUMAN	AAR2	Protein AAR2 homolog OS=Homo sapiens OX=9606 GN=AAR2 PE=1 SV=1	5553	3	154.142	170.09	171.846	167.605	148.356	140.306	139.075	166.738	145.869	169.04	178.877	165.18	166.743	179.102	158.554	172.898	0.0376927	0.306342	0.713312		0.0360407	0.220882	0.768306		-0.218017	2.28221	0.0178473	+	-0.0493113	0.248311	0.866436
sp|P49588|SYAC_HUMAN	AARS	Alanine--tRNA ligase, cytoplasmic OS=Homo sapiens OX=9606 GN=AARS PE=1 SV=2	1114	13	2523.5	2417.81	2558.84	2540.56	2354.48	2426.31	2372.58	2473.82	2469.69	2481.87	2149.76	2078.39	2097.23	2195.54	2334.25	2220.52	-0.251398	3.9107	0.01	+	-0.157963	1.99349	0.0889752		-0.0738978	1.64805	0.0507473		-0.0199415	0.446007	0.7372
sp|Q5JTZ9|SYAM_HUMAN	AARS2	Alanine--tRNA ligase, mitochondrial OS=Homo sapiens OX=9606 GN=AARS2 PE=1 SV=1	219	7	238.215	241.546	226.139	235.552	180.542	222.168	235.101	221.563	238.112	274.928	232.872	267.654	269.037	251.544	217.635	247.538	0.121449	0.676373	0.425285		0.0190027	0.0938642	0.899791		-0.155366	0.507657	0.421931		0.0516827	0.199014	0.895738
sp|Q9BTE6|AASD1_HUMAN	AARSD1	Alanyl-tRNA editing protein Aarsd1 OS=Homo sapiens OX=9606 GN=AARSD1 PE=1 SV=2	2527	8	349.183	375.862	371.369	362.305	349.52	320.251	358.864	350.707	366.897	375.674	388.578	386.792	356.508	387.952	346.025	339.738	0.0485044	0.433775	0.605186		-0.0290022	0.163202	0.823321		-0.0900561	0.693243	0.290301		-0.00102028	0.00901476	0.996275
sp|Q4L235|ACSF4_HUMAN	AASDH	Beta-alanine-activating enzyme OS=Homo sapiens OX=9606 GN=AASDH PE=1 SV=3	4119	1	13.8341	11.637	13.9489	13.5922	15.8533	12.8686	13.6387	15.4496	10.1127	14.4663	18.476	13.5914	14.6062	17.561	14.6471	14.7881	0.222506	0.633604	0.453144		0.240006	1.06787	0.244247		0.0896453	0.338161	0.59373		-0.010325	0.0164973	0.994141
sp|Q9NRN7|ADPPT_HUMAN	AASDHPPT	L-aminoadipate-semialdehyde dehydrogenase-phosphopantetheinyl transferase OS=Homo sapiens OX=9606 GN=AASDHPPT PE=1 SV=2	2015	3	427.215	440.513	426.992	434.052	393.594	353.753	356.026	405.969	412.995	444.861	404.3	390.865	372.858	403.006	374.244	416.559	-0.151315	1.43831	0.152315		-0.120455	0.951525	0.284014		-0.234412	1.42879	0.0744917		-0.0379398	0.346388	0.80519
sp|Q9NY61|AATF_HUMAN	AATF	Protein AATF OS=Homo sapiens OX=9606 GN=AATF PE=1 SV=1	6620	6	326.068	316.061	337.674	332.452	293.986	313.94	298.206	340.076	329.625	322.372	325.175	352.764	329.848	341.009	335.722	346.723	0.0337021	0.325016	0.697972		0.0567485	1.14857	0.219022		-0.119356	1.53526	0.0617434		0.0115981	0.142915	0.92875
tr|H3BRN4|H3BRN4_HUMAN	ABAT	4-aminobutyrate aminotransferase, mitochondrial OS=Homo sapiens OX=9606 GN=ABAT PE=1 SV=1	6445	2	223.137	254.141	249.267	236.679	164.683	202.728	192.582	260.071	262.093	248.246	248.617	288.306	316.877	278.18	243.225	288.622	0.235771	0.878375	0.321696		0.163118	0.831884	0.331978		-0.371142	1.44231	0.0721542		0.0942059	0.936399	0.481472
sp|O95477|ABCA1_HUMAN	ABCA1	Phospholipid-transporting ATPase ABCA1 OS=Homo sapiens OX=9606 GN=ABCA1 PE=1 SV=3	878	5	309.087	321.587	324.284	297.336	836.26	944.071	930.49	219.516	227.944	249.15	397.31	443.474	420.261	351.725	365.088	351.243	0.42449	2.62784	0.0368756	+	0.186077	2.48199	0.05045	+	1.52797	3.91474	0.000986301	+	-0.432303	2.2896	0.0958828
tr|A0A087WXK5|A0A087WXK5_HUMAN	ABCA2	ATP-binding cassette sub-family A member 2 OS=Homo sapiens OX=9606 GN=ABCA2 PE=1 SV=1	878	3	89.9801	98.95	97.495	85.5237	120.036	140.082	142.481	84.6816	99.1749	93.27	106.171	109.378	103.735	93.3106	81.5569	95.0472	0.196977	1.66687	0.115075		-0.0483255	0.219799	0.769344		0.527608	2.16316	0.0220195	+	-0.0100107	0.0411542	0.980888
sp|Q8N139|ABCA6_HUMAN	ABCA6	ATP-binding cassette sub-family A member 6 OS=Homo sapiens OX=9606 GN=ABCA6 PE=1 SV=2	878	7	150.197	136.343	146.808	138.645	142.78	132.439	135.942	146.323	161.359	154.721	158.711	167.524	178.794	153.541	138.564	134.738	0.234834	1.70007	0.110936		-0.00841132	0.0427818	0.95251		-0.060818	0.61248	0.340069		0.108178	0.980483	0.459767
sp|P08183|MDR1_HUMAN	ABCB1	ATP-dependent translocase ABCB1 OS=Homo sapiens OX=9606 GN=ABCB1 PE=1 SV=3	1607	6	322.602	336.414	334.418	338.613	310.315	313.253	338.237	370.587	396.081	384.606	438.788	474.79	482.315	486.58	479.526	479.853	0.481609	2.46152	0.0492632	+	0.533639	5.24996	0.004	+	-0.055622	0.53509	0.398305		0.204342	2.22148	0.10488
sp|Q9NRK6|ABCBA_HUMAN	ABCB10	ATP-binding cassette sub-family B member 10, mitochondrial OS=Homo sapiens OX=9606 GN=ABCB10 PE=1 SV=2	1913	5	336.897	409.917	383.685	390.355	332.872	383.771	379.642	358.517	398.077	373.222	349.83	423.956	427.126	389.454	395.625	390.888	0.0719896	0.25252	0.761777		0.0476934	0.310983	0.68757		-0.0564695	0.253461	0.689299		-0.0113795	0.053067	0.974668
sp|Q9NP58|ABCB6_HUMAN	ABCB6	ATP-binding cassette sub-family B member 6, mitochondrial OS=Homo sapiens OX=9606 GN=ABCB6 PE=1 SV=1	2652	4	156.092	169.487	161.25	160.05	168.635	188.076	180.189	165.684	190.354	175.128	153	152.097	163.631	140.426	142.448	155.822	-0.0498584	0.521258	0.53457		-0.146133	1.1685	0.214452		0.145395	1.19237	0.114051		0.128995	0.844638	0.522924
tr|A0A5F9ZA98|A0A5F9ZA98_HUMAN	ABCB7	ATP-binding cassette sub-family B member 7, mitochondrial OS=Homo sapiens OX=9606 GN=ABCB7 PE=4 SV=1	1572	3	273.575	294.714	252.185	249.004	187.473	256.779	242.797	273.933	273.218	284.685	236.179	279.145	319.232	263.87	244.739	259.145	0.0496911	0.128483	0.877939		-0.0605322	0.397148	0.614848		-0.233156	0.636443	0.324391		0.0556049	0.387878	0.775357
sp|Q9NUT2|MITOS_HUMAN	ABCB8	Mitochondrial potassium channel ATP-binding subunit OS=Homo sapiens OX=9606 GN=ABCB8 PE=1 SV=3	1913	8	140.522	155.343	154.611	132.172	126.985	166.212	144.904	142.635	164.625	147.865	146.042	173.351	179.007	135.679	136.951	156.653	0.18737	0.780106	0.369627		-0.0255183	0.105571	0.887279		-0.00173484	0.00443545	0.995112		0.0592692	0.288547	0.842133
tr|Q6P2Q0|Q6P2Q0_HUMAN	ABCB9	ABCB9 protein OS=Homo sapiens OX=9606 GN=ABCB9 PE=1 SV=1	1607	1	12.7079	19.0785	18.2533	16.7026	14.0125	17.1003	15.794	15.0587	18.1967	20.6515	16.1806	17.0213	13.3904	13.7286	17.4422	17.4712	-0.0938741	0.220864	0.793905		-0.0332275	0.0670592	0.929122		-0.0814384	0.204487	0.747917		0.112031	0.239969	0.870823
sp|P33527-9|MRP1_HUMAN	ABCC1	Isoform 9 of Multidrug resistance-associated protein 1 OS=Homo sapiens OX=9606 GN=ABCC1	1410	11	1347.82	1458.42	1277.24	1324.33	1537.73	1551.22	1634.96	1360.71	1468.45	1381.79	1276.1	1374.77	1519.25	1304.43	1308.7	1346.59	0.0380987	0.169607	0.837703		-0.0330434	0.312146	0.687602		0.221155	2.17299	0.021636	+	0.0550658	0.465407	0.725878
sp|Q5T3U5|MRP7_HUMAN	ABCC10	Multidrug resistance-associated protein 7 OS=Homo sapiens OX=9606 GN=ABCC10 PE=1 SV=1	1781	3	115.586	116.65	106.426	121.221	102.805	114.592	112.657	118.214	137.242	141.302	117.653	132.151	120.526	104.737	133.141	124.259	0.102363	0.730537	0.392372		0.064698	0.218748	0.77044		-0.0635429	0.438376	0.490823		0.199307	0.952974	0.47436
sp|O15438-4|MRP3_HUMAN	ABCC3	Isoform 4 of Canalicular multispecific organic anion transporter 2 OS=Homo sapiens OX=9606 GN=ABCC3	1410	14	1244.49	1326.07	1236.05	1262.14	1449.55	1457.58	1445.02	1421.77	1460.71	1354.8	1315.37	1391.84	1631.15	1295.99	1247.01	1295.77	0.185037	0.747683	0.385764		0.0143656	0.189676	0.796617		0.195676	2.53849	0.0119437	+	0.156399	1.77197	0.187104
sp|O15439|MRP4_HUMAN	ABCC4	Multidrug resistance-associated protein 4 OS=Homo sapiens OX=9606 GN=ABCC4 PE=1 SV=3	4534	9	383.134	431.662	409.333	374.145	404.002	414.326	420.273	388.77	398.751	403.674	427.889	473.219	465.304	409.912	423.639	454.645	0.189817	1.47081	0.143647		0.104807	0.782071	0.357364		0.0493293	0.419264	0.511412		-0.00695732	0.0479317	0.977115
sp|O15440|MRP5_HUMAN	ABCC5	Multidrug resistance-associated protein 5 OS=Homo sapiens OX=9606 GN=ABCC5 PE=1 SV=2	5391	1	18.5028	21.17	20.7428	18.6527	21.4796	21.4717	25.6163	20.727	22.6341	23.9262	16.8156	20.5405	20.2873	18.7067	17.9592	19.3348	-0.0441572	0.152327	0.854982		-0.080614	0.628359	0.445144		0.207049	0.934043	0.184595		0.182427	1.12029	0.401962
tr|A0A0G2JMG3|A0A0G2JMG3_HUMAN	ABCC6	Multidrug resistance-associated protein 6 OS=Homo sapiens OX=9606 GN=ABCC6 PE=1 SV=1	6536	1	4.12692	8.17068	6.2534	10.9315	6.09003	6.11111	7.07804	5.5289	6.2658	10.4932	8.63876	11.8194	9.13822	13.3403	11.2707	10.7437	0.495962	0.690066	0.416068		0.759902	1.0979	0.234244		-0.112234	0.132724	0.836574		0.0426459	0.0354854	0.983666
sp|P33897|ABCD1_HUMAN	ABCD1	ATP-binding cassette sub-family D member 1 OS=Homo sapiens OX=9606 GN=ABCD1 PE=1 SV=2	4220	7	466.033	497.434	440.091	431.171	483.48	475.391	513.093	434.995	458.414	446.336	456.365	449.683	466.882	484.96	511.418	517.137	-0.00119829	0.0080087	0.992524		0.139055	1.26783	0.192769		0.0986806	0.837866	0.220968		-0.0366564	0.290745	0.839291
tr|A0A3B3ITW3|A0A3B3ITW3_HUMAN	ABCD3	ATP-binding cassette sub-family D member 3 OS=Homo sapiens OX=9606 GN=ABCD3 PE=1 SV=2	2304	6	844.605	886.964	847.546	825.657	857.801	854.839	910.007	836.649	893.75	846.478	966.483	1023.52	922.079	953.571	930.302	945.201	0.188704	1.51566	0.136521		0.148224	2.53064	0.0479646	+	0.0383945	0.454341	0.473488		0.0129921	0.130946	0.934413
sp|O14678|ABCD4_HUMAN	ABCD4	ATP-binding cassette sub-family D member 4 OS=Homo sapiens OX=9606 GN=ABCD4 PE=1 SV=1	1715	6	397.743	413.033	389.251	367.363	373.832	367.423	380.256	437.698	453.381	437.721	382.346	407.714	473.787	388.732	415.711	395.983	0.0998914	0.404121	0.629414		0.0309316	0.277404	0.716069		-0.0667325	0.805085	0.235018		0.17789	2.02907	0.131137
sp|P61221|ABCE1_HUMAN	ABCE1	ATP-binding cassette sub-family E member 1 OS=Homo sapiens OX=9606 GN=ABCE1 PE=1 SV=1	4261	9	1671.36	1673.22	1617.42	1666.88	1597.94	1480.84	1568.66	1530.25	1575.65	1608.78	1468.37	1466.93	1370.33	1512.13	1458.48	1508.67	-0.208111	1.80986	0.0974049		-0.150515	2.65223	0.0391579	+	-0.0979031	1.07645	0.141913		-0.0767298	1.35194	0.31514
sp|Q8NE71|ABCF1_HUMAN	ABCF1	ATP-binding cassette sub-family F member 1 OS=Homo sapiens OX=9606 GN=ABCF1 PE=1 SV=2	428	5	255.067	266.043	284.501	259.892	271.477	289.093	314.959	255.242	262.657	269.825	297.592	248.058	250.061	235.258	244.013	246.344	-0.0101226	0.0359946	0.962604		-0.138262	1.68861	0.121755		0.130289	0.802108	0.236231		-0.0198638	0.18529	0.902194
sp|Q9UG63-2|ABCF2_HUMAN	ABCF2	Isoform 2 of ATP-binding cassette sub-family F member 2 OS=Homo sapiens OX=9606 GN=ABCF2	5783	11	1062.13	1039.9	1058.97	1062.48	899.637	863.238	899.597	1045.89	1007.05	1063.46	1037.56	994.197	961.763	993.546	982.181	1006.33	-0.0821917	0.938912	0.296037		-0.0871013	2.62824	0.0397588	+	-0.250844	2.57685	0.0110129	+	-0.0238316	0.380351	0.781387
sp|Q9NUQ8|ABCF3_HUMAN	ABCF3	ATP-binding cassette sub-family F member 3 OS=Homo sapiens OX=9606 GN=ABCF3 PE=1 SV=2	1176	11	2125.2	2032.01	2052.69	2058.94	2079.06	1957.5	1983.27	2040.25	1934.78	1925.75	2081.22	1956.04	1957.25	2036.38	2014.84	2010.32	-0.0494165	0.633688	0.453156		-0.0327818	1.01303	0.262982		-0.043206	0.618729	0.335578		-0.0720356	1.02532	0.443754
sp|Q9NUJ1|ABHDA_HUMAN	ABHD10	Mycophenolic acid acyl-glucuronide esterase, mitochondrial OS=Homo sapiens OX=9606 GN=ABHD10 PE=1 SV=1	2168	5	426.268	462.452	444.634	403.819	344.577	459.672	409.657	452.471	431.389	457.593	407.429	484.625	503.174	467.426	403.47	486.286	0.0946438	0.367427	0.663126		0.0561537	0.233335	0.756036		-0.110232	0.333667	0.598256		0.0434454	0.375194	0.783866
sp|Q8NFV4|ABHDB_HUMAN	ABHD11	Protein ABHD11 OS=Homo sapiens OX=9606 GN=ABHD11 PE=1 SV=1	2058	1	64.0997	67.4604	72.6938	61.1329	46.0407	72.8834	68.4299	69.8331	66.543	65.8649	65.0698	68.7174	70.1084	58.3168	53.4307	71.5076	0.0370487	0.236263	0.776448		-0.127143	0.373384	0.636671		-0.112659	0.189864	0.765238		0.0255342	0.161993	0.915206
sp|Q8N2K0-2|ABD12_HUMAN	ABHD12	Isoform 2 of Lysophosphatidylserine lipase ABHD12 OS=Homo sapiens OX=9606 GN=ABHD12	3696	3	386.768	434.511	407.395	370.885	415.709	413.767	447.371	390.459	398.816	394.495	418.768	466.414	540.02	457.089	465.836	438.515	0.243193	0.873261	0.323779		0.184576	1.5895	0.133692		0.0915561	0.707374	0.281427		-0.0167649	0.11998	0.940212
sp|Q7L211|ABHDD_HUMAN	ABHD13	Protein ABHD13 OS=Homo sapiens OX=9606 GN=ABHD13 PE=2 SV=1	7582	3	430.49	472.59	433.528	450.947	464.415	452.453	453.765	476.851	488.393	459.323	460.868	469.548	492.002	441.062	448.399	456.173	0.0858505	1.0194	0.269293		0.00620222	0.063547	0.931222		0.0327963	0.418948	0.51181		0.088117	1.09508	0.416851
tr|A0A1B0GW23|A0A1B0GW23_HUMAN	ABHD14A-ACY1	ABHD14A-ACY1 readthrough (Fragment) OS=Homo sapiens OX=9606 GN=ABHD14A-ACY1 PE=4 SV=1	1411	9	1721.66	1708.87	1633.7	1642.35	1857.11	1712.22	1694.01	1792.98	1594.36	1647.73	1834.13	1791.72	1855.04	1899.52	1765.13	1735.59	0.12411	2.41674	0.0527068		0.101758	0.968226	0.278924		0.064603	0.584891	0.361431		8.52972e-05	0.000498079	0.999873
sp|Q96IU4|ABHEB_HUMAN	ABHD14B	Protein ABHD14B OS=Homo sapiens OX=9606 GN=ABHD14B PE=1 SV=1	3404	4	175.176	187.557	198.116	173.065	198.876	177.831	190.681	194.077	187.569	190.136	208.09	177.206	178.146	188.216	174.46	195.944	0.0317834	0.130235	0.876232		0.021794	0.119793	0.872047		0.0443973	0.27634	0.660218		0.0569124	0.514566	0.698125
tr|A0A0G2JJD3|A0A0G2JJD3_HUMAN	ABHD16A	HLA-B associated transcript 5, isoform CRA_b OS=Homo sapiens OX=9606 GN=ABHD16A PE=1 SV=1	2418	8	436.912	482.048	468.733	435.322	403.14	441.035	447.167	437.494	473.186	472.361	449.468	509.64	524.324	475.592	481.258	463.15	0.115876	0.642482	0.44634		0.0558293	0.625132	0.447088		-0.0825129	0.627529	0.329655		0.0170113	0.119612	0.940645
sp|Q96GS6-2|AB17A_HUMAN	ABHD17A	Isoform 2 of Alpha/beta hydrolase domain-containing protein 17A OS=Homo sapiens OX=9606 GN=ABHD17A	847	1	29.8634	28.3469	35.6903	32.6717	29.6021	37.8549	32.4322	35.1604	41.7566	36.9453	37.9985	36.6665	39.0184	33.4962	31.2698	37.9046	0.265234	1.51973	0.136326		0.114094	0.457381	0.564613		0.0715831	0.219235	0.729116		0.264163	1.26875	0.341711
sp|Q5VST6|AB17B_HUMAN	ABHD17B	Alpha/beta hydrolase domain-containing protein 17B OS=Homo sapiens OX=9606 GN=ABHD17B PE=1 SV=1	847	2	40.3358	43.132	36.4183	28.1568	34.2245	33.6069	30.8263	43.5682	46.4094	37.034	39.063	42.5869	40.2972	32.2857	32.3362	41.3383	0.152556	0.460603	0.584371		-0.0592334	0.121999	0.870328		-0.153759	0.45924	0.468918		0.205773	0.566017	0.667962
sp|P08910|ABHD2_HUMAN	ABHD2	Monoacylglycerol lipase ABHD2 OS=Homo sapiens OX=9606 GN=ABHD2 PE=1 SV=1	6343	1	33.9826	29.3156	33.2669	26.8064	18.4812	17.703	20.2364	46.5643	47.104	34.4595	25.732	22.4846	24.5846	27.3519	45.2447	30.4491	-0.341531	1.73243	0.106143		0.126981	0.198776	0.788958		-0.709281	3.06102	0.00575661	+	0.461709	1.17675	0.381391
sp|Q8TB40|ABHD4_HUMAN	ABHD4	(Lyso)-N-acylphosphatidylethanolamine lipase OS=Homo sapiens OX=9606 GN=ABHD4 PE=2 SV=1	2647	1	10.8321	15.0373	11.8514	8.28769	17.7795	12.4977	11.6816	12.4447	8.8242	11.3328	12.3762	11.1248	16.6098	11.5615	11.551	12.1891	0.228305	0.397436	0.634637		0.0648232	0.130248	0.860971		0.289216	0.498505	0.429702		-0.0642984	0.101252	0.950845
sp|Q9BV23|ABHD6_HUMAN	ABHD6	Monoacylglycerol lipase ABHD6 OS=Homo sapiens OX=9606 GN=ABHD6 PE=1 SV=1	5858	4	159.199	185.502	184.251	172.765	190.287	197.906	190.812	173.111	189.039	187.151	192.456	200.454	194.849	180.804	195.974	181.189	0.161865	1.34419	0.17057		0.0860074	0.625168	0.447159		0.140194	1.17878	0.116893		0.0633407	0.42537	0.75138
sp|Q8IZP0|ABI1_HUMAN	ABI1	Abl interactor 1 OS=Homo sapiens OX=9606 GN=ABI1 PE=1 SV=4	5715	3	190.597	167.639	177.012	189.269	206.838	204.141	210.13	200.528	186.328	210.682	209.388	201.818	189.485	212.084	213.979	206.927	0.145397	1.19826	0.211619		0.222034	1.96344	0.0909354		0.194741	1.75614	0.0423917	+	0.137196	0.975787	0.461464
tr|F8WAL6|F8WAL6_HUMAN	ABI2	Abl interactor 2 OS=Homo sapiens OX=9606 GN=ABI2 PE=1 SV=2	5715	4	286.763	261.837	290.34	282.123	278.029	282.445	280.979	287.926	281.61	281.135	300.222	292.781	272.839	263.718	274.531	274.027	0.0423183	0.329947	0.69306		-0.0488878	0.577876	0.47631		0.00224033	0.0216171	0.973797		0.0179043	0.193511	0.898912
tr|D3YTG3|D3YTG3_HUMAN	ABI3BP	Target of Nesh-SH3 OS=Homo sapiens OX=9606 GN=ABI3BP PE=1 SV=1	8099	1	8.02734	3.44334	4.86057	7.23381	6.22174	8.00405	5.2815	7.72712	4.61242	7.86229	8.23094	12.1995	8.25924	13.8469	8.93966	8.40073	0.750786	1.10581	0.24297		0.859589	1.20261	0.20799		0.198512	0.240328	0.705243		0.228982	0.243909	0.867341
sp|Q9NX38|ABITM_HUMAN	ABITRAM	Protein Abitram OS=Homo sapiens OX=9606 GN=ABITRAM PE=1 SV=1	6272	3	96.3437	84.1886	100.194	114.688	87.1968	82.2216	110.838	88.5316	96.7448	108.254	98.8023	110.06	95.2135	96.8758	101.12	92.9194	0.0420976	0.142159	0.864885		-0.0198413	0.0704198	0.925555		-0.0851544	0.203906	0.748245		-0.0109705	0.0300333	0.985582
sp|P00519-2|ABL1_HUMAN	ABL1	Isoform IB of Tyrosine-protein kinase ABL1 OS=Homo sapiens OX=9606 GN=ABL1	561	2	41.1777	44.1427	39.3185	45.2387	46.2216	40.8327	37.0871	36.3192	34.7158	30.8859	36.6024	42.2981	47.7045	53.8519	45.7739	55.2757	-0.0153155	0.0423146	0.957274		0.279188	1.22666	0.201515		-0.0411311	0.145009	0.820948		-0.32311	1.67461	0.211802
sp|P42684|ABL2_HUMAN	ABL2	Tyrosine-protein kinase ABL2 OS=Homo sapiens OX=9606 GN=ABL2 PE=1 SV=1	561	5	278.514	274.321	273.834	271.121	315.199	281.816	288.908	275.335	283.835	257.546	278.411	273.779	272.251	303.209	271.441	259.663	0.00192512	0.0529267	0.950932		0.0160673	0.0797574	0.916168		0.104079	0.784345	0.243765		-0.0127731	0.103012	0.95128
tr|A0A3B3IS55|A0A3B3IS55_HUMAN	ABLIM1	Actin-binding LIM protein 1 OS=Homo sapiens OX=9606 GN=ABLIM1 PE=1 SV=1	3776	7	441.831	404.476	449.834	436.657	478.96	447.504	469.091	476.402	468.92	445.322	524.196	514.862	487.602	501.274	507.88	528.882	0.232805	2.38482	0.0533569		0.243817	2.6785	0.0383913	+	0.103364	1.1676	0.119419		0.0982629	1.0979	0.415007
tr|A0A0C4DGA7|A0A0C4DGA7_HUMAN	ABLIM3	Actin-binding LIM protein 3 OS=Homo sapiens OX=9606 GN=ABLIM3 PE=1 SV=1	7925	1	22.1269	23.4858	18.104	22.0807	23.7884	21.119	22.129	23.0119	21.9918	24.0143	19.8102	17.0812	17.8023	19.5498	19.529	17.0246	-0.230599	1.11317	0.241253		-0.19404	0.903438	0.303622		0.0640749	0.270984	0.667668		0.106909	0.525349	0.689904
tr|A0A1C7CYZ0|A0A1C7CYZ0_HUMAN	ABR	Active breakpoint cluster region-related protein OS=Homo sapiens OX=9606 GN=ABR PE=1 SV=1	1545	7	680.585	667.088	701.34	718.71	756.822	753.607	727.824	683.081	713.837	720.719	825.375	824.506	738.141	742.542	764.562	795.114	0.200781	1.33468	0.172		0.149379	1.86928	0.101762		0.109075	1.83925	0.0368193	+	0.0289853	0.367226	0.791305
sp|Q15018|ABRX2_HUMAN	ABRAXAS2	BRISC complex subunit Abraxas 2 OS=Homo sapiens OX=9606 GN=ABRAXAS2 PE=1 SV=2	5673	5	126.171	122.451	130.297	137.405	128.778	123.005	124.433	128.039	129.792	119.285	125.513	125.594	133.666	129.224	117.797	137.149	-0.00854349	0.0646274	0.940938		-0.0129822	0.0606923	0.935063		-0.0406317	0.432933	0.496701		-0.03789	0.301022	0.835989
sp|Q9ULW3|ABT1_HUMAN	ABT1	Activator of basal transcription 1 OS=Homo sapiens OX=9606 GN=ABT1 PE=1 SV=1	5	3	682.326	719.393	752.413	744.292	695.27	729.6	740.538	639.966	691.311	732.049	668.903	711.439	667.422	673.005	690.331	671.773	-0.0857799	0.963279	0.289543		-0.094199	1.27875	0.190009		-0.00507449	0.0416934	0.95081		-0.0764019	0.500932	0.708037
sp|Q969K4|ABTB1_HUMAN	ABTB1	Ankyrin repeat and BTB/POZ domain-containing protein 1 OS=Homo sapiens OX=9606 GN=ABTB1 PE=1 SV=1	3779	1	7.66222	8.51598	5.58126	3.95336	9.61968	8.52865	10.1749	6.64991	9.28294	8.7812	7.36891	10.7156	7.724	11.3867	7.95527	8.80546	0.461245	0.724215	0.395619		0.590294	0.983501	0.27355		0.612182	1.0586	0.146369		0.404544	0.644127	0.625489
sp|Q8N961|ABTB2_HUMAN	ABTB2	Ankyrin repeat and BTB/POZ domain-containing protein 2 OS=Homo sapiens OX=9606 GN=ABTB2 PE=2 SV=2	7004	1	10.2808	13.5075	9.68346	8.7878	7.65115	10.7987	10.921	10.6894	11.7155	8.96161	6.48081	7.94458	8.37415	14.6819	11.8889	11.958	-0.464786	1.35049	0.16935		0.293656	0.859182	0.319886		-0.10965	0.197088	0.757307		-0.00474397	0.00904091	0.996322
sp|P09110|THIK_HUMAN	ACAA1	3-ketoacyl-CoA thiolase, peroxisomal OS=Homo sapiens OX=9606 GN=ACAA1 PE=1 SV=2	4307	8	409.069	356.883	420.195	426.138	451.3	469.95	462.405	436.271	405.09	423.505	430.261	414.299	390.637	421.446	438.627	414.957	0.0330272	0.17838	0.829752		0.0795576	0.554867	0.490153		0.197707	1.41257	0.0763162		0.0677382	0.443333	0.738977
sp|P42765|THIM_HUMAN	ACAA2	3-ketoacyl-CoA thiolase, mitochondrial OS=Homo sapiens OX=9606 GN=ACAA2 PE=1 SV=2	430	9	1165.44	1188.45	1155.92	1140.17	1019.86	1332.17	1281.88	1156.34	1139.67	1164.83	1086.64	1195.21	1340.38	1183.75	1079.92	1174.94	0.0495319	0.200831	0.812683		-0.0214363	0.17415	0.811421		0.0497419	0.142675	0.822851		-0.0109612	0.289949	0.840809
sp|Q13085-4|ACACA_HUMAN	ACACA	Isoform 4 of Acetyl-CoA carboxylase 1 OS=Homo sapiens OX=9606 GN=ACACA	2006	12	799.829	805.609	780.507	814.853	811.646	717.369	730.393	802.58	808.327	799.573	791.921	811.378	776.615	785.292	814.335	788.049	-0.0125373	0.216186	0.798261		-0.00780171	0.135945	0.855152		-0.0894344	0.610337	0.341384		0.00609063	0.163573	0.914889
sp|O00763|ACACB_HUMAN	ACACB	Acetyl-CoA carboxylase 2 OS=Homo sapiens OX=9606 GN=ACACB PE=1 SV=3	2006	2	285.011	289.422	293.728	269.427	280.528	252.713	252.76	299.693	297.769	274.56	277.445	255.545	281.246	263.125	296.685	272.142	-0.0679379	0.580613	0.488544		-0.0374619	0.248043	0.741517		-0.119338	0.910574	0.193102		0.0311249	0.250282	0.866053
sp|Q6JQN1-5|ACD10_HUMAN	ACAD10	Isoform 5 of Acyl-CoA dehydrogenase family member 10 OS=Homo sapiens OX=9606 GN=ACAD10	2125	5	654.649	677.454	648.716	655.26	529.934	729.75	684.25	649.225	680.023	685.587	803.471	820.362	956.706	768.381	671.848	757.044	0.380069	1.42479	0.153568		0.149987	0.892667	0.308052		-0.0375452	0.0886608	0.894603		0.0270892	0.39701	0.770581
sp|Q709F0|ACD11_HUMAN	ACAD11	Acyl-CoA dehydrogenase family member 11 OS=Homo sapiens OX=9606 GN=ACAD11 PE=1 SV=3	4410	2	21.2675	17.7711	26.8577	28.1967	29.5056	29.4559	22.2201	24.4136	26.4423	23.2292	26.6329	28.6837	28.3803	22.4622	30.9315	29.7644	0.269682	0.746426	0.386246		0.24696	0.525174	0.512014		0.214042	0.460125	0.467944		0.092396	0.2178	0.884157
sp|Q9UKU7|ACAD8_HUMAN	ACAD8	Isobutyryl-CoA dehydrogenase, mitochondrial OS=Homo sapiens OX=9606 GN=ACAD8 PE=1 SV=1	3481	2	87.5197	86.7579	92.4382	107.601	80.0301	87.462	91.6394	88.5508	107.721	92.931	97.9485	113.869	119.092	101.627	103.573	105.28	0.237766	1.0266	0.267025		0.150638	0.901663	0.304356		-0.112289	0.558398	0.381057		0.0432864	0.145314	0.927833
sp|Q9H845|ACAD9_HUMAN	ACAD9	Complex I assembly factor ACAD9, mitochondrial OS=Homo sapiens OX=9606 GN=ACAD9 PE=1 SV=1	3661	11	724.957	801.059	692.224	670.411	602.807	709.362	679.644	700.937	770.438	734.635	654.915	768.445	914.744	759.875	691.484	730.672	0.0998504	0.252608	0.761848		0.0125385	0.0644568	0.930729		-0.121356	0.611163	0.340707		0.0283082	0.157006	0.919527
tr|Q5T4U5|Q5T4U5_HUMAN	ACADM	Acyl-Coenzyme A dehydrogenase, C-4 to C-12 straight chain, isoform CRA_a OS=Homo sapiens OX=9606 GN=ACADM PE=1 SV=1	631	6	594.477	643.829	639.103	652.346	489.892	618.259	603.405	630.943	677.91	642.626	628.001	689.878	699.596	624.282	593.608	631.837	0.0878806	0.67529	0.425648		-0.0362425	0.381172	0.629419		-0.155396	0.553995	0.384369		0.0408648	0.408464	0.7613
sp|P16219|ACADS_HUMAN	ACADS	Short-chain specific acyl-CoA dehydrogenase, mitochondrial OS=Homo sapiens OX=9606 GN=ACADS PE=1 SV=1	5069	4	61.9932	57.7089	53.8651	60.5754	58.1756	64.6042	64.5167	56.1724	67.8188	50.1497	66.7849	76.3221	78.2273	66.6484	58.3651	58.6289	0.332518	1.67803	0.113864		0.0638494	0.34149	0.661355		0.0933249	0.639913	0.322364		-0.0213174	0.0525172	0.975155
sp|P45954|ACDSB_HUMAN	ACADSB	Short/branched chain specific acyl-CoA dehydrogenase, mitochondrial OS=Homo sapiens OX=9606 GN=ACADSB PE=1 SV=1	3395	7	343.504	365.156	335.82	378.345	286.097	350.632	352.157	367.034	366.213	383.257	330.477	359.701	392.004	352.768	321.494	390.521	0.0183479	0.0782407	0.925771		-0.00608708	0.0220545	0.974575		-0.114831	0.432643	0.496867		0.0665786	0.686613	0.603477
sp|P49748-3|ACADV_HUMAN	ACADVL	Isoform 3 of Very long-chain specific acyl-CoA dehydrogenase, mitochondrial OS=Homo sapiens OX=9606 GN=ACADVL	1733	14	1676.07	1855.2	1592.27	1609.93	1527.05	1784.71	1771.31	1737.3	1756.16	1789.19	1634.9	1768.8	1965.32	1673.48	1604.45	1662	0.0868942	0.394864	0.63648		-0.0294015	0.211697	0.778662		0.00839957	0.0317722	0.962326		0.0675076	0.562157	0.668514
sp|Q15057|ACAP2_HUMAN	ACAP2	Arf-GAP with coiled-coil, ANK repeat and PH domain-containing protein 2 OS=Homo sapiens OX=9606 GN=ACAP2 PE=1 SV=3	3016	10	962.704	886.496	982.358	1001.74	1094.39	1058.47	1029.27	966.932	943.479	962.342	979.324	985.961	949.742	966.424	1034.35	997.45	0.0213113	0.193891	0.816963		0.0615449	0.590718	0.467524		0.147531	1.58544	0.0565261		0.000345284	0.00277644	0.997482
sp|Q96P50|ACAP3_HUMAN	ACAP3	Arf-GAP with coiled-coil, ANK repeat and PH domain-containing protein 3 OS=Homo sapiens OX=9606 GN=ACAP3 PE=1 SV=2	3016	4	149.955	165.826	148.634	156.073	173.766	166.609	172.306	154.055	149.073	160.943	157.403	167.982	159.221	156.081	155.07	157.354	0.0592205	0.592256	0.479722		0.0110299	0.107261	0.884732		0.140815	1.6541	0.0504101		-0.00337479	0.0237132	0.988835
tr|A0A5F9ZHL1|A0A5F9ZHL1_HUMAN	ACAT1	Acetyl-CoA acetyltransferase, mitochondrial OS=Homo sapiens OX=9606 GN=ACAT1 PE=4 SV=1	628	8	412.757	444.59	419.171	415.825	340.438	441.61	409.835	451.779	447.876	430.868	335.966	393.028	437.551	434.274	388.793	433.773	-0.129521	0.440877	0.599289		-0.0154715	0.0921985	0.901867		-0.0985849	0.325948	0.606448		0.0683332	1.05623	0.433398
sp|Q9BWD1-2|THIC_HUMAN	ACAT2	Isoform 2 of Acetyl-CoA acetyltransferase, cytosolic OS=Homo sapiens OX=9606 GN=ACAT2	3384	1	45.061	43.1089	50.9732	45.9655	46.0043	40.8629	42.943	57.3513	58.0889	50.8115	42.4459	41.0254	43.4797	47.1631	45.9817	45.663	-0.126711	1.06524	0.255751		0.00237576	0.0146654	0.98284		-0.0958778	0.623639	0.332335		0.260209	1.55542	0.254157
sp|Q9H3P7|GCP60_HUMAN	ACBD3	Golgi resident protein GCP60 OS=Homo sapiens OX=9606 GN=ACBD3 PE=1 SV=4	3743	5	203.192	186.856	200.954	190.446	223.564	192.096	196.944	188.224	195.986	193.172	215.314	205.294	193.527	186.537	202.701	205.546	0.0669684	0.54759	0.513414		0.0208377	0.146322	0.844911		0.0615125	0.327115	0.605287		-0.0208921	0.24594	0.867195
sp|Q8NC06-2|ACBD4_HUMAN	ACBD4	Isoform 2 of Acyl-CoA-binding domain-containing protein 4 OS=Homo sapiens OX=9606 GN=ACBD4	2466	1	21.6701	19.0961	26.845	26.2584	23.923	25.727	29.2516	30.5246	26.4538	20.2027	26.032	28.3971	25.2236	24.9705	30.3097	29.6726	0.190331	0.677278	0.424677		0.279774	0.937658	0.288699		0.173462	0.545371	0.390295		0.126061	0.233978	0.874645
sp|Q5T8D3-3|ACBD5_HUMAN	ACBD5	Isoform 3 of Acyl-CoA-binding domain-containing protein 5 OS=Homo sapiens OX=9606 GN=ACBD5	2466	7	443.715	446.74	462.427	467.276	474.041	488.252	466.69	436.572	452.811	461.92	458.547	470.382	469.905	459.11	457.893	484.654	0.0354481	0.771744	0.373858		0.0379595	0.508851	0.522344		0.0660584	1.2382	0.104724		-0.0147185	0.187392	0.902637
sp|Q9BR61|ACBD6_HUMAN	ACBD6	Acyl-CoA-binding domain-containing protein 6 OS=Homo sapiens OX=9606 GN=ACBD6 PE=1 SV=1	5886	2	257.438	277.495	281.496	267.828	228.064	217.843	211.842	268.024	261.14	280.193	269.922	252.594	234.487	243.749	238.963	266.732	-0.10482	0.68195	0.421582		-0.118586	0.929621	0.291129		-0.305872	2.96474	0.00619718	+	-0.00657483	0.0554314	0.972974
sp|Q96QU6|1A1L1_HUMAN	ACCS	1-aminocyclopropane-1-carboxylate synthase-like protein 1 OS=Homo sapiens OX=9606 GN=ACCS PE=1 SV=1	2297	1	33.6368	22.6477	30.2167	32.2761	21.8559	27.9119	27.2506	22.6654	25.8222	24.1984	25.591	31.4977	22.8231	29.5568	36.6393	30.0558	-0.153345	0.344235	0.680157		0.121037	0.309209	0.688683		-0.202074	0.537014	0.396492		-0.279133	0.931709	0.484583
tr|A0A590TQL1|A0A590TQL1_HUMAN	ACD	Adrenocortical dysplasia homolog (Mouse), isoform CRA_a OS=Homo sapiens OX=9606 GN=ACD PE=1 SV=1	5320	1	10.0875	9.64821	11.402	14.0241	9.60263	5.24326	6.65414	11.9812	9.74644	9.0097	9.26819	8.46681	13.5083	10.4222	9.87638	9.38621	-0.131492	0.209721	0.805222		-0.176081	0.60781	0.457026		-0.685404	1.02053	0.157556		-0.135101	0.328282	0.816844
sp|P12821|ACE_HUMAN	ACE	Angiotensin-converting enzyme OS=Homo sapiens OX=9606 GN=ACE PE=1 SV=1	2044	4	99.8353	105.201	87.3596	99.3386	101.279	100.554	107.278	114.263	117.432	107.813	120.597	144.056	144.781	116.159	116.037	112.803	0.477007	1.90412	0.0868915		0.234938	1.64399	0.127351		0.0759945	0.527134	0.40479		0.211013	1.5522	0.25526
sp|P22303-2|ACES_HUMAN	ACHE	Isoform H of Acetylcholinesterase OS=Homo sapiens OX=9606 GN=ACHE	3512	1	30.8382	34.9762	31.162	31.3694	32.3785	41.8405	34.1052	34.5329	35.6905	30.6221	38.3631	43.2264	46.6284	39.6292	36.6153	45.2262	0.410887	1.69709	0.1109		0.331997	1.34384	0.176555		0.16325	0.548913	0.387354		0.0659688	0.338641	0.810711
sp|Q9UKV3|ACINU_HUMAN	ACIN1	Apoptotic chromatin condensation inducer in the nucleus OS=Homo sapiens OX=9606 GN=ACIN1 PE=1 SV=2	450	10	534.929	507.075	542.625	521.921	565.901	541.551	552.316	547.953	546.376	527.418	514.382	493.886	516.688	556.669	552.492	548.267	-0.0508962	0.823349	0.345136		0.0695506	1.36788	0.170578		0.0713802	1.27816	0.0965056		0.0379643	0.637251	0.629211
sp|P25106|ACKR3_HUMAN	ACKR3	Atypical chemokine receptor 3 OS=Homo sapiens OX=9606 GN=ACKR3 PE=1 SV=3	8168	1	24.3064	25.9319	27.2958	28.5502	40.0715	48.322	42.2293	38.4854	46.2983	48.862	34.0097	35.8524	39.8554	33.2259	34.0106	36.7019	0.463036	2.28104	0.0598675		0.386821	2.67993	0.0384481	+	0.713273	2.55136	0.0116948	+	0.743433	2.08194	0.123885
sp|P53396|ACLY_HUMAN	ACLY	ATP-citrate synthase OS=Homo sapiens OX=9606 GN=ACLY PE=1 SV=3	835	16	3026.51	3130.78	2939.36	2992.3	3051.63	2902.33	2937.66	3124.89	2940.15	3009.78	2985.51	2993.75	2976.7	3002.69	3024.19	3053.64	-0.0173519	0.363041	0.66537		0.00254455	0.0422916	0.95342		-0.0280805	0.417311	0.513707		0.00121749	0.0125794	0.994535
sp|P21399|ACOC_HUMAN	ACO1	Cytoplasmic aconitate hydratase OS=Homo sapiens OX=9606 GN=ACO1 PE=1 SV=3	3419	17	1843.88	1894.71	1873.93	1844.76	2027.79	1922.83	2026.04	1827.73	1776.68	1907.98	1994.25	1964.06	1865.44	1867.66	1692.83	1731.18	0.0578449	0.752496	0.383279		-0.0810806	0.710379	0.396809		0.0953786	1.30497	0.0923446		-0.0214612	0.256567	0.862307
tr|A2A274|A2A274_HUMAN	ACO2	Aconitate hydratase, mitochondrial OS=Homo sapiens OX=9606 GN=ACO2 PE=1 SV=1	4769	14	1412.16	1486.06	1385.16	1366.01	893.246	1171.18	1129.3	1473.68	1514.3	1401.07	1032.35	1128.58	1289.61	1375.04	1221.8	1336.15	-0.301562	1.13125	0.233019		-0.1085	0.809402	0.343051		-0.41718	1.15319	0.122744		0.050847	0.535329	0.68405
sp|Q86TX2|ACOT1_HUMAN	ACOT1	Acyl-coenzyme A thioesterase 1 OS=Homo sapiens OX=9606 GN=ACOT1 PE=1 SV=1	982	4	601.662	596.292	543.408	530.802	484.976	574.983	525.467	559.068	571.819	576.786	449.692	498.793	522.308	534.375	489.535	543.816	-0.213036	1.25947	0.191461		-0.119668	0.881888	0.311812		-0.105451	0.541891	0.392777		0.00507734	0.0355236	0.983826
sp|Q9NPJ3|ACO13_HUMAN	ACOT13	Acyl-coenzyme A thioesterase 13 OS=Homo sapiens OX=9606 GN=ACOT13 PE=1 SV=1	6543	3	262.19	279.78	263.648	275.902	199.714	264.262	256.719	276.03	265.563	286.27	287.087	298.909	334.591	297.723	268.603	291.905	0.180112	1.0045	0.273169		0.0805631	0.674052	0.420093		-0.181054	0.534357	0.398277		0.0293333	0.306098	0.83255
sp|Q8N9L9|ACOT4_HUMAN	ACOT4	Peroxisomal succinyl-coenzyme A thioesterase OS=Homo sapiens OX=9606 GN=ACOT4 PE=1 SV=2	2975	1	231.451	241.227	240.058	242.357	264.575	238.518	265.449	247.592	241.265	251.58	244.766	236.1	202.855	256.027	212.649	233.342	-0.0716537	0.318415	0.702977		-0.0329984	0.14665	0.844853		0.0999994	0.746177	0.260953		0.0477964	0.992276	0.4581
sp|O00154|BACH_HUMAN	ACOT7	Cytosolic acyl coenzyme A thioester hydrolase OS=Homo sapiens OX=9606 GN=ACOT7 PE=1 SV=3	907	8	593.491	579.077	592.036	586.008	609.02	599.471	554.496	551.005	548.205	574.96	499.066	488.135	495.474	568.344	533.269	539.126	-0.24979	4.80209	0.00923077	+	-0.104147	1.24194	0.198574		-0.0011111	0.00814858	0.991141		-0.0748158	1.21637	0.362529
sp|O14734|ACOT8_HUMAN	ACOT8	Acyl-coenzyme A thioesterase 8 OS=Homo sapiens OX=9606 GN=ACOT8 PE=1 SV=1	879	2	226.974	237.419	242.484	229.642	260.502	265.925	258.926	237.94	230.594	237.081	243.746	243.948	260.097	257.131	240.181	236.944	0.0901911	1.10297	0.244203		0.063581	0.654706	0.430688		0.161475	2.6924	0.00947027	+	0.006968	0.0964389	0.95433
sp|Q9Y305-4|ACOT9_HUMAN	ACOT9	Isoform 4 of Acyl-coenzyme A thioesterase 9, mitochondrial OS=Homo sapiens OX=9606 GN=ACOT9	5122	6	527.667	613.531	515.795	488.768	484.384	565.971	576.874	566.942	555.385	611.233	532.857	601.435	654.703	633.603	553.896	616.123	0.152821	0.625368	0.459218		0.167293	0.892623	0.307992		0.0168673	0.0550978	0.934175		0.111293	0.626595	0.632439
sp|Q15067-2|ACOX1_HUMAN	ACOX1	Isoform 2 of Peroxisomal acyl-coenzyme A oxidase 1 OS=Homo sapiens OX=9606 GN=ACOX1	1540	5	188.028	201.308	201.947	176.815	230.23	211.934	207.108	183.341	181.747	163.58	186.526	169.973	179.105	195.186	192.007	184.884	-0.10398	0.843933	0.335813		-0.00826609	0.0560211	0.939699		0.173216	1.32845	0.0885475		-0.123657	0.841224	0.523247
sp|O15254|ACOX3_HUMAN	ACOX3	Peroxisomal acyl-coenzyme A oxidase 3 OS=Homo sapiens OX=9606 GN=ACOX3 PE=1 SV=2	5284	3	138.766	150.327	135.703	151.3	143.519	138.572	153.603	140.778	140.74	141.047	177.781	167.644	172.495	159.72	154.531	152.214	0.262696	2.51531	0.0446087	+	0.111858	1.20469	0.207067		0.0123722	0.0740868	0.91228		-0.0304456	0.300071	0.83551
sp|P24666|PPAC_HUMAN	ACP1	Low molecular weight phosphotyrosine protein phosphatase OS=Homo sapiens OX=9606 GN=ACP1 PE=1 SV=3	5414	5	130.092	133.876	126.134	123.665	135.14	119.42	130.319	132.816	131.171	128.189	137.929	132.229	128.217	130.306	115.771	143.197	0.0480613	0.54267	0.517189		0.00993684	0.0348948	0.962148		-0.00294046	0.0162675	0.979673		0.0259274	0.377486	0.783407
tr|A0A5F9ZHR7|A0A5F9ZHR7_HUMAN	ACP2	Lysosomal acid phosphatase OS=Homo sapiens OX=9606 GN=ACP2 PE=4 SV=1	2914	5	512.056	503.394	475.067	475.988	506.2	531.882	533.519	481.403	490.007	479.747	515.006	516.776	543.852	485.349	558.025	531.822	0.095686	1.28128	0.185989		0.0933371	0.599943	0.462178		0.092023	1.2524	0.101523		-0.0226544	0.3131	0.828864
sp|Q9NPH0|PPA6_HUMAN	ACP6	Lysophosphatidic acid phosphatase type 6 OS=Homo sapiens OX=9606 GN=ACP6 PE=1 SV=3	2606	1	76.6537	71.1696	71.2285	67.4366	66.6688	67.5529	69.0833	69.4956	66.9472	64.0612	85.5035	69.2146	94.7952	74.9601	82.7913	75.8123	0.205057	0.583744	0.487248		0.120444	0.977072	0.276066		-0.0784453	0.888413	0.201059		-0.099102	0.959982	0.46917
sp|Q96CM8-2|ACSF2_HUMAN	ACSF2	Isoform 2 of Medium-chain acyl-CoA ligase ACSF2, mitochondrial OS=Homo sapiens OX=9606 GN=ACSF2	543	8	1482.8	1540.9	1494.91	1455.01	1185.63	1535.8	1481.83	1560.66	1508.1	1575.75	1444.1	1617.12	1795.62	1591.13	1465.18	1595.25	0.111064	0.461988	0.583619		0.0533412	0.497596	0.530999		-0.100955	0.319381	0.613171		0.0520127	0.976654	0.461317
tr|A0A3B3ISK9|A0A3B3ISK9_HUMAN	ACSF3	Malonate--CoA ligase ACSF3, mitochondrial OS=Homo sapiens OX=9606 GN=ACSF3 PE=1 SV=1	1871	6	316.551	326.248	329.797	315.648	272.068	330.501	308.824	328.07	298.468	332.795	306.595	337.999	372.276	316.056	306.315	353.608	0.0694997	0.316858	0.704287		0.0120402	0.0614491	0.934203		-0.0886065	0.404058	0.526096		-0.0116709	0.0761217	0.962944
sp|P33121|ACSL1_HUMAN	ACSL1	Long-chain-fatty-acid--CoA ligase 1 OS=Homo sapiens OX=9606 GN=ACSL1 PE=1 SV=1	881	2	268.342	265.956	264.721	286.242	284.681	309.67	293.598	273.305	283.067	285.115	342.425	371.017	317.992	314.262	311.442	302.708	0.339512	1.67324	0.11487		0.190377	2.68888	0.0396818	+	0.125398	1.32929	0.0884133		0.048491	0.709359	0.591179
sp|O95573|ACSL3_HUMAN	ACSL3	Long-chain-fatty-acid--CoA ligase 3 OS=Homo sapiens OX=9606 GN=ACSL3 PE=1 SV=3	841	9	609.284	651.934	616.558	617.088	643.646	629.709	655.09	583.576	636.539	656.412	637.782	672.276	721.434	688.215	683.962	704.541	0.117273	0.866059	0.326761		0.150765	2.59833	0.0426927	+	0.0438269	0.768007	0.250441		0.00286868	0.0167467	0.994112
sp|O60488|ACSL4_HUMAN	ACSL4	Long-chain-fatty-acid--CoA ligase 4 OS=Homo sapiens OX=9606 GN=ACSL4 PE=1 SV=2	841	6	913.914	943.119	883.253	920.386	886.447	889.31	925.293	958.316	909.404	941.714	955.005	996.811	958.774	965.526	982.741	1021.06	0.0843654	1.51591	0.13675		0.113066	1.72521	0.117019		-0.0234306	0.355764	0.576365		0.033263	0.498616	0.708854
sp|Q9ULC5-3|ACSL5_HUMAN	ACSL5	Isoform 2 of Long-chain-fatty-acid--CoA ligase 5 OS=Homo sapiens OX=9606 GN=ACSL5	881	10	628.691	674.523	672.345	674.506	732.68	790.134	821.486	645.757	674.818	724.542	742.309	804.031	853.671	710.746	750.201	740.057	0.270337	1.54534	0.131818		0.147436	2.09631	0.0803235		0.237193	1.66758	0.0493896	+	0.0402068	0.290022	0.840808
sp|Q53FZ2|ACSM3_HUMAN	ACSM3	Acyl-coenzyme A synthetase ACSM3, mitochondrial OS=Homo sapiens OX=9606 GN=ACSM3 PE=1 SV=2	815	6	829.317	861.725	845.499	851.427	612.416	814.043	758.362	907.159	865.612	907.032	831.985	971.958	992.472	869.018	761.627	925.94	0.13395	0.628102	0.458052		0.0042538	0.0159321	0.981632		-0.228041	0.688309	0.293317		0.0765338	1.25732	0.344314
sp|Q9NUB1|ACS2L_HUMAN	ACSS1	Acetyl-coenzyme A synthetase 2-like, mitochondrial OS=Homo sapiens OX=9606 GN=ACSS1 PE=1 SV=2	3676	5	280.548	302.461	291.88	296.806	237.715	293.748	271.323	289.089	312.414	306.488	303.776	340.365	333.371	306.312	281.91	303.949	0.152433	1.12339	0.236057		0.0213822	0.179884	0.804789		-0.135365	0.577263	0.367064		0.0469613	0.497879	0.708819
sp|Q9NR19-2|ACSA_HUMAN	ACSS2	Isoform 2 of Acetyl-coenzyme A synthetase, cytoplasmic OS=Homo sapiens OX=9606 GN=ACSS2	1220	3	122.366	114.026	121.013	130.571	116.877	125.694	124.454	129.285	128.85	124.258	129.813	147.358	135.77	132.449	127.262	134.19	0.173834	1.22406	0.202318		0.107365	1.13862	0.220992		0.00503261	0.0332116	0.960657		0.0647215	0.670277	0.610777
sp|P68133|ACTS_HUMAN	ACTA1	Actin, alpha skeletal muscle OS=Homo sapiens OX=9606 GN=ACTA1 PE=1 SV=1	1664	20	1777.17	1716.18	1782.32	1833.36	1866.64	1847.67	1806.59	1637.57	1633.69	1820.31	2011.93	1956.25	1849.01	1794.72	1827.5	1890.92	0.125217	1.29575	0.182701		0.0483156	0.773689	0.36162		0.0505494	1.04684	0.149271		-0.0679656	0.498459	0.708568
sp|P63261|ACTG_HUMAN	ACTG1	Actin, cytoplasmic 2 OS=Homo sapiens OX=9606 GN=ACTG1 PE=1 SV=1	1664	11	203.014	224.091	236.382	249.256	256.659	259.485	237.807	215.837	201.641	210.883	241.43	237.169	266.854	214.856	227.243	221.276	0.125087	0.722144	0.397314		-0.0416188	0.24265	0.746636		0.142329	0.928717	0.185854		-0.120045	0.804367	0.540862
sp|O96019|ACL6A_HUMAN	ACTL6A	Actin-like protein 6A OS=Homo sapiens OX=9606 GN=ACTL6A PE=1 SV=1	1849	11	482.009	482.118	508.416	487.24	467.715	447.503	457.965	450.854	467.085	474.06	485.04	460.659	440.06	481.29	461.285	450.484	-0.085771	0.808653	0.352239		-0.0775918	1.05939	0.248356		-0.0980173	1.85415	0.0355545	+	-0.078467	1.35051	0.315503
sp|P12814-3|ACTN1_HUMAN	ACTN1	Isoform 3 of Alpha-actinin-1 OS=Homo sapiens OX=9606 GN=ACTN1	183	21	3089.99	3025.33	3015.94	3056.94	3256.67	3252.66	3208.16	2952.98	2938.38	2962.18	3108.87	3055.51	3046.25	3227.22	3075.47	3089.29	0.0109316	0.384464	0.645849		0.0387771	0.667352	0.423752		0.0882402	3.39017	0.00330709	+	-0.0460637	2.22582	0.10476
sp|O43707|ACTN4_HUMAN	ACTN4	Alpha-actinin-4 OS=Homo sapiens OX=9606 GN=ACTN4 PE=1 SV=2	183	15	1729.25	1696.25	1607.91	1547.7	1853.81	1770.42	1773.33	1619.87	1574.36	1630.36	1657.47	1638.19	1730.64	1713.12	1684.5	1633.93	0.0271785	0.249998	0.764051		0.0288124	0.281664	0.712518		0.130063	1.50936	0.0650999		-0.0316739	0.328764	0.816717
sp|Q9NZ32|ARP10_HUMAN	ACTR10	Actin-related protein 10 OS=Homo sapiens OX=9606 GN=ACTR10 PE=1 SV=1	5581	3	94.2085	92.7853	90.4794	99.6841	94.5872	99.4861	108.296	94.2648	102.355	94.6089	97.5066	87.6185	101.584	92.3292	95.2339	95.1721	0.0176023	0.0868383	0.917481		9.04343e-05	0.000895004	0.998662		0.0948394	0.63087	0.327179		0.0418917	0.358733	0.797273
sp|P61163|ACTZ_HUMAN	ACTR1A	Alpha-centractin OS=Homo sapiens OX=9606 GN=ACTR1A PE=1 SV=1	1665	9	1264.33	1366.9	1236.55	1296.75	1334.29	1324.45	1325.84	1248.35	1239.47	1280.46	1313.85	1304.2	1259.66	1228.06	1251.8	1263.49	0.00237466	0.0220193	0.977215		-0.0483589	0.650619	0.432427		0.0418321	0.566209	0.375392		-0.0388227	0.497523	0.709064
sp|P42025|ACTY_HUMAN	ACTR1B	Beta-centractin OS=Homo sapiens OX=9606 GN=ACTR1B PE=1 SV=1	1665	1	13.4582	16.6651	19.9618	11.6587	14.2066	17.0096	11.4928	15.2663	17.3953	15.9104	17.1444	14.1863	19.5357	16.0821	14.2066	17.9944	0.153459	0.29162	0.724679		0.083864	0.16142	0.825445		-0.104777	0.16979	0.791371		0.097015	0.207389	0.892347
sp|P61160|ARP2_HUMAN	ACTR2	Actin-related protein 2 OS=Homo sapiens OX=9606 GN=ACTR2 PE=1 SV=1	3864	8	1097.8	1094.18	1055.06	1020.54	1145.73	1080.52	1084.25	1123.06	1054.95	1049.98	1072.57	1028.12	1090.06	1110.91	1102.45	1049.04	-0.00428478	0.0417067	0.957476		0.0277275	0.32183	0.677893		0.0487826	0.603753	0.346095		0.0122097	0.11107	0.94768
sp|P61158|ARP3_HUMAN	ACTR3	Actin-related protein 3 OS=Homo sapiens OX=9606 GN=ACTR3 PE=1 SV=3	1273	12	591.882	553.904	600.475	594.35	608.893	603.579	592.824	592.503	556.645	571.489	608.572	588.829	600.012	594.733	613.701	601.373	0.0346654	0.514939	0.539278		0.0445888	0.693932	0.407108		0.041021	0.641978	0.321108		-0.0286554	0.321306	0.821347
sp|Q9P1U1|ARP3B_HUMAN	ACTR3B	Actin-related protein 3B OS=Homo sapiens OX=9606 GN=ACTR3B PE=2 SV=1	1273	7	1162.14	1143.08	1179.3	1195	1237.03	1197	1219.13	1145.69	1160.06	1175.58	1293.91	1175.24	1239.84	1208.1	1276.64	1215.91	0.0787859	0.745756	0.386254		0.0762131	1.14539	0.219901		0.0578889	1.48778	0.0673144		-0.0115666	0.26975	0.853626
sp|Q9H9F9|ARP5_HUMAN	ACTR5	Actin-related protein 5 OS=Homo sapiens OX=9606 GN=ACTR5 PE=1 SV=2	453	2	43.3911	45.6075	49.3892	47.2004	42.7889	37.4393	42.9958	41.3198	41.7228	45.3289	35.9226	41.861	34.8474	40.0806	40.8384	40.8152	-0.308566	1.35549	0.168881		-0.191771	1.84422	0.104225		-0.177088	1.03373	0.153407		-0.116383	0.978544	0.460675
sp|Q9GZN1|ARP6_HUMAN	ACTR6	Actin-related protein 6 OS=Homo sapiens OX=9606 GN=ACTR6 PE=1 SV=1	5452	5	158.319	167.443	159.729	168.499	140.534	149.491	154.849	167.359	161.101	178.813	159.774	173.372	142.061	145.853	168.991	162.927	-0.049913	0.210878	0.804593		-0.0401553	0.219764	0.769284		-0.141438	1.2884	0.0948889		0.0477367	0.392409	0.772612
sp|Q9H981|ARP8_HUMAN	ACTR8	Actin-related protein 8 OS=Homo sapiens OX=9606 GN=ACTR8 PE=1 SV=2	3897	3	345.011	350.944	320.92	323.831	330.937	288.291	311.225	322.647	314.054	321.021	365.922	321.469	309.681	317.715	342.787	318.588	-0.0148349	0.0628931	0.941351		-0.0382553	0.330255	0.670338		-0.113154	0.749266	0.259387		-0.0692888	0.924578	0.487517
sp|Q04771|ACVR1_HUMAN	ACVR1	Activin receptor type-1 OS=Homo sapiens OX=9606 GN=ACVR1 PE=1 SV=1	5399	2	219.343	228.946	226.752	220.874	254.679	272.705	262.958	289.554	294.922	320.687	246.637	234.805	252.524	235.651	220.806	234.372	0.126957	1.44642	0.14984		0.0396101	0.490566	0.537594		0.233817	2.30867	0.017239	+	0.428644	2.19591	0.106736
sp|Q96HD9|ACY3_HUMAN	ACY3	N-acyl-aromatic-L-amino acid amidohydrolase (carboxylate-forming) OS=Homo sapiens OX=9606 GN=ACY3 PE=1 SV=1	6986	3	32.2283	27.9655	31.8571	30.5452	33.826	36.1737	30.8428	25.0228	24.4919	25.1145	38.3188	29.2234	35.1289	38.7773	39.3285	39.5104	0.152311	0.497896	0.552022		0.357372	2.41352	0.0559693		0.132368	0.739777	0.263956		-0.298945	2.22935	0.103984
sp|P14621|ACYP2_HUMAN	ACYP2	Acylphosphatase-2 OS=Homo sapiens OX=9606 GN=ACYP2 PE=1 SV=2	7117	2	213.968	201.895	210.591	223.251	192.815	210.378	190.463	221.609	215.112	224.8	236.399	252.98	235.713	227.373	226.936	219.404	0.186399	1.96789	0.0833149		0.0809511	1.15144	0.218467		-0.10279	0.863004	0.211267		0.0545545	0.728704	0.575442
sp|P00813|ADA_HUMAN	ADA	Adenosine deaminase OS=Homo sapiens OX=9606 GN=ADA PE=1 SV=3	3655	6	160.708	177.066	169.122	165.281	165.144	194.733	169.975	172.56	205.445	178.075	186.786	188.108	182.97	190.235	216.182	190.119	0.146923	1.97646	0.0834522		0.241049	1.39396	0.165329		0.0689197	0.342069	0.590304		0.138183	0.681286	0.605998
sp|O14672|ADA10_HUMAN	ADAM10	Disintegrin and metalloproteinase domain-containing protein 10 OS=Homo sapiens OX=9606 GN=ADAM10 PE=1 SV=1	1966	7	170.972	198.272	184.786	182.115	151.668	166.975	162.272	190.414	209.991	194.96	164.576	180.89	190.821	206.968	202.239	202.895	-0.0426244	0.216606	0.79798		0.150748	1.42192	0.160396		-0.198332	1.65509	0.0503738		0.109562	0.870683	0.510347
sp|Q13444|ADA15_HUMAN	ADAM15	Disintegrin and metalloproteinase domain-containing protein 15 OS=Homo sapiens OX=9606 GN=ADAM15 PE=1 SV=4	517	6	239.399	229.828	224.878	233.786	253.786	271.225	271.807	239.952	220.516	249.159	256.614	272.23	295.058	251.051	242.284	232.715	0.241566	1.37204	0.164926		0.0608389	0.728882	0.386622		0.194986	1.97598	0.0297809	+	0.0266563	0.174476	0.909357
sp|P78536|ADA17_HUMAN	ADAM17	Disintegrin and metalloproteinase domain-containing protein 17 OS=Homo sapiens OX=9606 GN=ADAM17 PE=1 SV=1	2739	8	721.644	759.233	712.685	710.668	847.733	904.969	915.728	749.469	760.951	789.45	738.018	746.239	805.805	722.352	697.941	744.832	0.0716739	0.682117	0.421615		-0.00866018	0.0882804	0.90603		0.292565	2.50741	0.0126393	+	0.0786058	1.24806	0.348037
sp|Q9H013|ADA19_HUMAN	ADAM19	Disintegrin and metalloproteinase domain-containing protein 19 OS=Homo sapiens OX=9606 GN=ADAM19 PE=1 SV=3	6670	1	8.12648	15.8529	13.31	12.3075	12.9403	15.402	15.6067	17.0009	14.4304	14.8127	16.2382	17.1464	14.9016	12.672	13.958	12.2219	0.41488	0.875151	0.323309		0.101361	0.179469	0.805041		0.276344	0.55045	0.386153		0.351145	0.729947	0.575552
sp|Q9UKQ2|ADA28_HUMAN	ADAM28	Disintegrin and metalloproteinase domain-containing protein 28 OS=Homo sapiens OX=9606 GN=ADAM28 PE=2 SV=3	3311	1	18.9659	13.1384	17.1523	16.0932	10.8811	13.5408	9.41905	18.1035	19.2601	21.7038	29.8916	18.0181	29.405	30.5382	19.1478	18.6033	0.632904	0.999304	0.274569		0.452271	0.746918	0.377086		-0.537916	1.32883	0.0884804		0.277764	1.0117	0.450895
sp|P78325|ADAM8_HUMAN	ADAM8	Disintegrin and metalloproteinase domain-containing protein 8 OS=Homo sapiens OX=9606 GN=ADAM8 PE=1 SV=2	916	6	596.323	652.01	592.134	591.046	1028.87	1086.76	1043.26	723.58	803.773	775.99	589.618	627.036	672.12	616.609	620.102	624.217	0.0498036	0.311513	0.708845		0.0304242	0.355018	0.650589		0.793447	5.04563	0	+	0.336781	2.44483	0.0767385
sp|Q13443|ADAM9_HUMAN	ADAM9	Disintegrin and metalloproteinase domain-containing protein 9 OS=Homo sapiens OX=9606 GN=ADAM9 PE=1 SV=1	3644	4	293.036	301.399	288.466	271.782	281.493	269.302	289.436	346.19	355.417	340.795	270.682	299.701	326.91	320.389	320.509	316.896	0.0479378	0.210405	0.804429		0.146332	1.76225	0.11115		-0.0432115	0.432644	0.49696		0.268259	2.96875	0.0356364	+
sp|O75689|ADAP1_HUMAN	ADAP1	Arf-GAP with dual PH domain-containing protein 1 OS=Homo sapiens OX=9606 GN=ADAP1 PE=1 SV=2	3498	6	1335.65	1330.03	1301.29	1399.64	1331.21	1347.03	1284.14	1339.66	1363.81	1353.92	1523.68	1575.96	1416.13	1371.04	1450	1445.49	0.165082	1.31564	0.176534		0.0841276	1.18887	0.210522		-0.0223922	0.306294	0.627362		0.0120509	0.197003	0.896974
sp|P55265-4|DSRAD_HUMAN	ADAR	Isoform 4 of Double-stranded RNA-specific adenosine deaminase OS=Homo sapiens OX=9606 GN=ADAR	463	19	1585.92	1551.65	1656.22	1683.23	1654.68	1644.52	1680.2	1700.95	1669.5	1715.46	1621.4	1679.77	1593.56	1598.84	1642.55	1697.12	0.0113565	0.119149	0.886534		0.0241214	0.265961	0.726091		0.0363881	0.553428	0.384578		0.0668883	1.06299	0.429908
sp|Q9BUB4|ADAT1_HUMAN	ADAT1	tRNA-specific adenosine deaminase 1 OS=Homo sapiens OX=9606 GN=ADAT1 PE=1 SV=1	671	3	198.482	178.244	183.332	178.89	183.88	180.923	167.739	183.715	181.006	180.453	192.43	211.642	175.662	184.568	195.632	189.85	0.0621557	0.28195	0.732503		0.04162	0.415671	0.598091		-0.057312	0.460683	0.467286		-0.0223882	0.233431	0.875219
sp|Q86TW2|ADCK1_HUMAN	ADCK1	AarF domain-containing protein kinase 1 OS=Homo sapiens OX=9606 GN=ADCK1 PE=1 SV=2	7689	2	45.5171	57.3524	49.0263	54.3748	39.9019	47.1852	53.0504	52.3729	49.8844	48.6033	54.9088	54.194	60.0013	51.2823	51.7631	63.5766	0.132699	0.710498	0.402904		0.105605	0.348227	0.654754		-0.146637	0.439355	0.489922		-0.0312012	0.142569	0.92909
sp|Q3MIX3|ADCK5_HUMAN	ADCK5	Uncharacterized aarF domain-containing protein kinase 5 OS=Homo sapiens OX=9606 GN=ADCK5 PE=1 SV=3	5456	1	118.661	117.45	119.897	113.854	88.0151	109.279	123.246	108.338	117.265	123.469	125.959	165.588	159.954	133.901	107.232	141.189	0.347435	0.97888	0.284311		0.107875	0.328725	0.671334		-0.150175	0.396321	0.534472		-0.0154814	0.0923031	0.956277
tr|A0A0A0MSC1|A0A0A0MSC1_HUMAN	ADCY3	Adenylate cyclase type 3 OS=Homo sapiens OX=9606 GN=ADCY3 PE=1 SV=1	6410	2	114.514	121.676	106.234	121.936	113.943	109.779	103.454	109.692	149.985	119.889	127.492	138.663	144.263	118.51	119.529	112.393	0.237246	1.63527	0.11803		0.0106559	0.0689187	0.92674		-0.0890166	0.676292	0.300523		0.113674	0.306943	0.833021
sp|O43306|ADCY6_HUMAN	ADCY6	Adenylate cyclase type 6 OS=Homo sapiens OX=9606 GN=ADCY6 PE=1 SV=2	3340	4	465.246	471.263	475.14	466.194	588.193	638.549	608.738	570.714	609.612	586.938	456.58	488.234	506.1	487.288	496.97	498.244	0.0416687	0.356407	0.669934		0.0739763	2.34454	0.0571906		0.381351	2.2056	0.0203307	+	0.327003	2.32925	0.0928789
sp|P51828|ADCY7_HUMAN	ADCY7	Adenylate cyclase type 7 OS=Homo sapiens OX=9606 GN=ADCY7 PE=1 SV=1	3653	3	123.55	159.182	132.448	154.13	177.279	184.75	173.308	143.712	162.032	157.247	171.591	168.862	156.176	153.936	150.199	140.83	0.224661	1.10828	0.242298		0.0663837	0.280517	0.713069		0.333642	1.57386	0.0580605		0.122827	0.54537	0.679723
sp|O60503|ADCY9_HUMAN	ADCY9	Adenylate cyclase type 9 OS=Homo sapiens OX=9606 GN=ADCY9 PE=1 SV=4	4983	4	134.332	145.864	127.845	135.425	129.813	147	140.471	149.035	151.306	160.686	139.125	148.814	162.043	129.056	143.48	142.481	0.14151	0.847432	0.334775		0.0259596	0.154477	0.834752		0.0335953	0.19742	0.756783		0.178542	1.74985	0.190874
sp|P35611-3|ADDA_HUMAN	ADD1	Isoform 3 of Alpha-adducin OS=Homo sapiens OX=9606 GN=ADD1	625	12	1210.86	1154.9	1206.96	1221.54	1161.83	1116.17	1205.44	1272.92	1211.65	1223.05	1253.83	1269.15	1185.43	1194.64	1229.41	1274.21	0.0442352	0.537961	0.51962		0.040412	0.544252	0.498193		-0.0461312	0.533801	0.398824		0.0442296	0.724922	0.578621
sp|Q9UEY8|ADDG_HUMAN	ADD3	Gamma-adducin OS=Homo sapiens OX=9606 GN=ADD3 PE=1 SV=1	1542	11	454.154	450.685	454.437	479.519	500.548	467.999	472.868	474.459	438.811	477.169	489.001	467.957	478.007	468.769	490.45	517.395	0.0575061	1.03639	0.264267		0.0978407	0.9087	0.300915		0.0635747	0.792183	0.240406		0.0112188	0.0887543	0.955711
sp|Q8IWK6|AGRA3_HUMAN	ADGRA3	Adhesion G protein-coupled receptor A3 OS=Homo sapiens OX=9606 GN=ADGRA3 PE=1 SV=2	6003	1	8.70388	8.73219	9.65143	8.54134	7.39205	6.59918	9.04477	6.58833	6.21974	5.41249	7.17707	10.0812	9.14279	7.97418	5.85803	10.2906	-0.0300935	0.0663511	0.938861		-0.183633	0.285872	0.708656		-0.224853	0.64299	0.320351		-0.555615	1.98314	0.141567
sp|Q5T601|AGRF1_HUMAN	ADGRF1	Adhesion G-protein coupled receptor F1 OS=Homo sapiens OX=9606 GN=ADGRF1 PE=1 SV=2	8276	1	11.9927	15.6083	13.6426	15.1952	12.566	9.05352	13.7018	22.1486	18.2223	19.7302	15.7949	19.102	17.4249	14.9147	18.9966	14.1005	0.30906	1.32956	0.172619		0.177023	0.481102	0.545483		-0.27557	0.572304	0.370799		0.508724	2.08181	0.123796
sp|P00326|ADH1G_HUMAN	ADH1C	Alcohol dehydrogenase 1C OS=Homo sapiens OX=9606 GN=ADH1C PE=1 SV=2	5804	5	77.2351	75.5479	82.0128	75.6954	87.2668	70.204	75.2153	83.6635	80.4409	71.9461	142.146	125.478	119.069	101.222	101.842	103.022	0.728454	2.26773	0.0609294		0.395188	3.39392	0.0204068	+	-0.00633833	0.0209716	0.974366		0.0174723	0.0848376	0.957287
sp|P11766|ADHX_HUMAN	ADH5	Alcohol dehydrogenase class-3 OS=Homo sapiens OX=9606 GN=ADH5 PE=1 SV=4	348	8	346.14	346.36	368.457	362.242	376.955	346.091	342.842	330.788	342.838	352.327	341.004	332.127	330.311	319.257	364.505	329.309	-0.0887366	1.62595	0.119225		-0.0771532	0.503984	0.526517		-0.00282367	0.0187629	0.976917		-0.0570698	0.769528	0.557091
sp|Q8IWW8|HOT_HUMAN	ADHFE1	Hydroxyacid-oxoacid transhydrogenase, mitochondrial OS=Homo sapiens OX=9606 GN=ADHFE1 PE=1 SV=1	7701	1	13.3058	14.8385	14.3687	19.1575	9.95522	17.3267	16.9175	16.2308	14.4195	12.9609	25.9837	26.1658	30.2126	22.7535	22.5447	17.6239	0.84292	2.72967	0.0334503	+	0.448244	1.33867	0.177025		-0.095547	0.118612	0.855975		-0.0769194	0.204474	0.892518
sp|Q9BV57|MTND_HUMAN	ADI1	1,2-dihydroxy-3-keto-5-methylthiopentene dioxygenase OS=Homo sapiens OX=9606 GN=ADI1 PE=1 SV=1	7316	6	1388.23	1385.33	1410	1367.64	852.098	812.51	825.153	1250.12	1382.17	1253.17	1126.57	1096.77	1086.45	1175.97	1341.31	1266.01	-0.331108	3.71038	0.0104348	+	-0.140121	0.91444	0.298266		-0.741954	4.00775	0.001125	+	-0.101187	0.785272	0.548934
sp|Q96A54|PAQR1_HUMAN	ADIPOR1	Adiponectin receptor protein 1 OS=Homo sapiens OX=9606 GN=ADIPOR1 PE=1 SV=1	8228	1	58.0068	62.9913	53.3836	60.09	70.6301	70.0863	75.622	61.8947	55.2971	60.473	62.5606	70.2372	73.877	61.0233	52.4044	57.2502	0.232148	1.23647	0.198697		-0.0432811	0.206853	0.781903		0.300683	2.32404	0.017035	+	0.0157129	0.0792638	0.960777
sp|Q15847|ADIRF_HUMAN	ADIRF	Adipogenesis regulatory factor OS=Homo sapiens OX=9606 GN=ADIRF PE=1 SV=1	2605	1	171.746	68.492	97.0884	299.128	82.4334	181.669	176.886	102.39	168.169	265.07	80.6334	124.659	259.496	166.593	151.041	165.655	0.0179452	0.0087773	0.991282		0.243379	0.19415	0.792608		0.0253732	0.0142028	0.983003		0.287016	0.180939	0.904498
sp|P55263|ADK_HUMAN	ADK	Adenosine kinase OS=Homo sapiens OX=9606 GN=ADK PE=1 SV=2	153	10	652.152	685.832	659.187	698.212	702.708	649.513	625.722	609.788	620.416	646.024	670.87	616.383	600.597	657.344	673.126	649.947	-0.0997682	0.792528	0.361339		-0.0292384	0.467396	0.556704		-0.0325856	0.226343	0.72147		-0.107477	1.56375	0.250476
sp|Q9H2P0|ADNP_HUMAN	ADNP	Activity-dependent neuroprotector homeobox protein OS=Homo sapiens OX=9606 GN=ADNP PE=1 SV=1	3346	16	2341.76	2245.5	2292.62	2488.24	2040.8	2027.54	1937.2	2398.17	2333.63	2432.63	2124.05	2141.15	1960.52	2169.83	2225.77	2278.59	-0.174542	1.58467	0.124742		-0.0733456	0.944027	0.285897		-0.225742	2.6145	0.0108108	+	0.0289873	0.330777	0.81553
sp|Q6IQ32|ADNP2_HUMAN	ADNP2	Activity-dependent neuroprotector homeobox protein 2 OS=Homo sapiens OX=9606 GN=ADNP2 PE=1 SV=1	4399	1	73.5057	79.1568	89.3734	90.3308	69.4779	75.6976	80.541	77.5694	92.5216	83.6584	73.4187	83.1957	63.7698	76.156	77.4237	78.5628	-0.180898	0.602714	0.47237		-0.0975485	0.572207	0.47966		-0.140567	0.703875	0.283247		0.0271878	0.095573	0.955145
sp|Q96SZ5|AEDO_HUMAN	ADO	2-aminoethanethiol dioxygenase OS=Homo sapiens OX=9606 GN=ADO PE=1 SV=2	1077	2	78.4368	84.1713	88.0677	88.0537	73.8703	66.3817	73.5366	86.4528	80.664	76.448	70.3387	72.3079	78.7843	77.3794	75.1456	75.4118	-0.198337	1.49245	0.139077		-0.154988	1.62045	0.130472		-0.24905	1.78663	0.0397187	+	-0.0610251	0.40006	0.766907
sp|Q9BRR6|ADPGK_HUMAN	ADPGK	ADP-dependent glucokinase OS=Homo sapiens OX=9606 GN=ADPGK PE=1 SV=1	2869	2	234.817	245.768	237.911	212.772	238.245	238.97	242.845	241.898	230.499	248.436	223.062	255.972	271.909	243.84	267.507	262.228	0.101711	0.440035	0.599755		0.148303	1.23446	0.200068		0.0459627	0.41653	0.514522		0.0468702	0.364025	0.792622
sp|P54922|ADPRH_HUMAN	ADPRH	[Protein ADP-ribosylarginine] hydrolase OS=Homo sapiens OX=9606 GN=ADPRH PE=1 SV=1	6700	1	28.3815	35.3438	34.2301	35.4416	28.4852	29.7166	35.0614	37.3124	29.4805	30.7315	33.3491	29.8227	34.1739	30.5225	30.4715	30.1203	-0.0361281	0.138975	0.868194		-0.129089	0.721623	0.390383		-0.101324	0.357068	0.57468		-0.0387345	0.107778	0.94813
sp|Q16186|ADRM1_HUMAN	ADRM1	Proteasomal ubiquitin receptor ADRM1 OS=Homo sapiens OX=9606 GN=ADRM1 PE=1 SV=2	2659	7	1039.11	1156.63	1047.57	1040.18	1004.29	908.587	916.576	1026.25	1032.41	1053.37	1005.96	826.076	1000.62	1032.79	1046.14	1033.08	-0.186018	0.759551	0.378819		-0.0444306	0.488993	0.539062		-0.183223	1.46929	0.0686848		-0.0444854	0.482994	0.715932
sp|P30566|PUR8_HUMAN	ADSL	Adenylosuccinate lyase OS=Homo sapiens OX=9606 GN=ADSL PE=1 SV=2	260	4	379.428	385.153	392.728	401.623	397.542	353.434	396.98	399.633	405.865	401.61	367.323	451.859	369.032	394.183	385.52	375.416	0.0167317	0.054639	0.950014		-0.017437	0.259545	0.732007		-0.028286	0.172902	0.787521		0.0463327	1.12743	0.400837
sp|Q8N142|PURA1_HUMAN	ADSS1	Adenylosuccinate synthetase isozyme 1 OS=Homo sapiens OX=9606 GN=ADSS1 PE=1 SV=1	1889	1	9.44951	10.1314	11.6303	9.21624	6.21696	12.4449	11.234	8.67506	9.51755	9.18047	9.12312	7.17608	4.81467	9.29247	8.21585	7.95465	-0.564529	0.788057	0.364079		-0.249159	1.23332	0.200214		-0.0767517	0.0802898	0.905326		-0.142572	0.790434	0.546095
sp|P30520|PURA2_HUMAN	ADSS2	Adenylosuccinate synthetase isozyme 2 OS=Homo sapiens OX=9606 GN=ADSS2 PE=1 SV=3	1889	8	724.763	722.025	750.562	724.019	701.097	676.919	693.292	716.343	709.411	704.53	718.584	663.056	704.95	688.225	718.472	700.818	-0.0711197	0.77384	0.372382		-0.0561052	1.17862	0.211565		-0.0810358	1.92165	0.0330695	+	-0.0404114	1.30962	0.325846
sp|Q6ZN18|AEBP2_HUMAN	AEBP2	Zinc finger protein AEBP2 OS=Homo sapiens OX=9606 GN=AEBP2 PE=1 SV=2	5124	2	52.4354	44.6489	50.3479	51.0602	37.5778	35.4536	45.4977	47.1767	51.1908	53.5006	50.092	38.8069	48.8883	60.151	43.2127	44.2228	-0.118197	0.367302	0.663242		-0.0267126	0.0546504	0.940777		-0.334455	1.1446	0.124648		0.0295139	0.150537	0.925112
sp|Q8N556-2|AFAP1_HUMAN	AFAP1	Isoform 2 of Actin filament-associated protein 1 OS=Homo sapiens OX=9606 GN=AFAP1	3485	4	134.616	133.168	135.295	139.355	162.861	156.402	158.805	155.094	138.801	143.666	133.653	132.452	134.701	132.644	130.436	143.058	-0.0213352	0.618908	0.463024		-0.00340873	0.0253995	0.971107		0.23281	3.51426	0.00218966	+	0.103717	0.821421	0.531591
sp|Q8N4X5|AF1L2_HUMAN	AFAP1L2	Actin filament-associated protein 1-like 2 OS=Homo sapiens OX=9606 GN=AFAP1L2 PE=1 SV=1	1041	4	138.688	141.679	156.918	158.518	140.011	137.087	127.558	137.922	150.08	151.954	171.209	149.819	162.42	160.02	157.643	151.095	0.113955	0.71166	0.402251		0.0711748	0.577955	0.476273		-0.141687	1.10671	0.133142		-0.0212086	0.11812	0.940947
sp|P55196-1|AFAD_HUMAN	AFDN	Isoform 2 of Afadin OS=Homo sapiens OX=9606 GN=AFDN	273	19	1242.17	1200.28	1202.39	1156.99	1265.23	1237.42	1229.27	1257.72	1225.94	1210.62	1210.22	1167.96	1141.38	1242.09	1230.05	1229.16	-0.0331156	0.446092	0.594883		0.0399244	0.819703	0.33836		0.0517169	1.03587	0.152793		0.0370197	0.655413	0.619665
sp|P51825-2|AFF1_HUMAN	AFF1	Isoform 2 of AF4/FMR2 family member 1 OS=Homo sapiens OX=9606 GN=AFF1	8250	1	25.022	25.9621	24.4858	24.8802	21.5648	20.7193	26.3142	23.02	17.8046	23.9654	29.3623	27.3562	22.2797	21.7792	19.5259	29.3724	0.0605506	0.177887	0.829796		-0.11237	0.229688	0.75959		-0.141472	0.501741	0.427462		-0.22794	0.637931	0.629493
sp|Q9UHB7|AFF4_HUMAN	AFF4	AF4/FMR2 family member 4 OS=Homo sapiens OX=9606 GN=AFF4 PE=1 SV=1	2890	9	563.043	553.496	599.699	601.052	601.968	621.888	627.379	599.363	608.387	629.253	611.068	613.34	550.571	586.463	622.11	620.591	0.0295963	0.187328	0.822891		0.0742309	0.873418	0.314852		0.0918397	1.2699	0.0980258		0.0806332	1.079	0.423429
sp|Q8WV93|AFG1L_HUMAN	AFG1L	AFG1-like ATPase OS=Homo sapiens OX=9606 GN=AFG1L PE=1 SV=2	6934	2	258.428	298.255	281.424	270.903	225.265	266.222	267.939	281.21	308.586	300.211	264.81	312.516	301.94	287.1	262.547	303.754	0.0785089	0.380938	0.649698		0.0364699	0.184451	0.800699		-0.133822	0.616989	0.336477		0.0985582	0.804339	0.540711
sp|Q9Y4W6|AFG32_HUMAN	AFG3L2	AFG3-like protein 2 OS=Homo sapiens OX=9606 GN=AFG3L2 PE=1 SV=2	3313	7	862.506	945.8	856.453	886.77	651.308	841.665	852.812	865.583	938.344	942.089	857.985	968.712	1078.99	924.189	819.841	905.901	0.120292	0.474802	0.570163		-0.00828909	0.0447679	0.950886		-0.19298	0.578942	0.365678		0.0439666	0.358589	0.79705
tr|J3KMX3|J3KMX3_HUMAN	AFP	Alpha-fetoprotein OS=Homo sapiens OX=9606 GN=AFP PE=1 SV=1	6936	2	204.275	209.249	273.369	266.523	466.954	217.583	193.293	173.608	339.171	168.334	209.997	173.25	166.799	200.411	397.061	231.959	-0.373099	1.23651	0.19881		0.161853	0.184915	0.800128		0.191668	0.165352	0.795393		-0.137153	0.139581	0.93095
sp|Q6ULP2-9|AFTIN_HUMAN	AFTPH	Isoform 5 of Aftiphilin OS=Homo sapiens OX=9606 GN=AFTPH	3632	5	388.4	371.657	389.47	387.033	358.602	367.53	382.608	384.112	368.527	391.227	387.001	395.954	375.249	407.461	396.687	405.846	0.00713521	0.0922587	0.911924		0.0704942	1.77374	0.110297		-0.0560001	0.783471	0.244053		-0.0109365	0.132625	0.933471
tr|E7EUN2|E7EUN2_HUMAN	AGAP1	Arf-GAP with GTPase, ANK repeat and PH domain-containing protein 1 OS=Homo sapiens OX=9606 GN=AGAP1 PE=1 SV=1	4114	3	91.252	124.477	105.336	102.298	98.0537	112.992	99.187	93.5797	96.2095	108.127	113.054	106.707	91.6461	97.2123	107.188	109.648	-0.0246252	0.0671895	0.938346		-0.00881802	0.0279551	0.969231		-0.0275334	0.0872622	0.89678		-0.0858141	0.318328	0.82363
sp|Q96P47-4|AGAP3_HUMAN	AGAP3	Isoform 4 of Arf-GAP with GTPase, ANK repeat and PH domain-containing protein 3 OS=Homo sapiens OX=9606 GN=AGAP3	4114	1	28.3629	23.3495	24.4024	26.6368	26.6339	30.097	28.2849	26.7607	29.9578	34.3857	33.5413	31.9305	29.8875	33.2536	27.7489	25.7892	0.309845	1.94306	0.0848723		0.167276	0.571861	0.479889		0.144012	0.868406	0.208741		0.237992	0.869276	0.511607
sp|P52594-4|AGFG1_HUMAN	AGFG1	Isoform 4 of Arf-GAP domain and FG repeat-containing protein 1 OS=Homo sapiens OX=9606 GN=AGFG1	1747	5	1541.96	1494.26	1509.8	1512.52	1562.21	1458.24	1460.39	1540.74	1529.55	1469.73	1478.08	1490.4	1521.39	1466.22	1525.06	1506.69	-0.0172724	0.483365	0.563357		-0.0147603	0.305106	0.691944		-0.0208203	0.224953	0.722914		-0.00144977	0.0203131	0.990925
sp|O95081|AGFG2_HUMAN	AGFG2	Arf-GAP domain and FG repeat-containing protein 2 OS=Homo sapiens OX=9606 GN=AGFG2 PE=1 SV=2	1029	2	737.988	730.137	769.797	817.232	569.456	618.54	570.732	737.687	803.102	760.706	789.814	865.907	827.177	733.312	860.797	801.696	0.116227	1.07706	0.252566		0.0626381	0.329006	0.671104		-0.381325	2.93879	0.00657859	+	0.00689659	0.0463873	0.97829
sp|Q8N302|AGGF1_HUMAN	AGGF1	Angiogenic factor with G patch and FHA domains 1 OS=Homo sapiens OX=9606 GN=AGGF1 PE=1 SV=2	4644	3	65.7035	65.5717	71.3523	70.8818	61.2118	67.1155	54.3946	69.2498	67.834	63.6683	62.1802	64.3434	57.2867	66.1053	68.3269	65.4262	-0.158872	1.21114	0.207091		-0.0366586	0.411145	0.601866		-0.171048	0.743401	0.262245		-0.0308901	0.250171	0.865712
sp|Q53H12|AGK_HUMAN	AGK	Acylglycerol kinase, mitochondrial OS=Homo sapiens OX=9606 GN=AGK PE=1 SV=2	103	5	669.369	768.059	681.32	659.682	540.484	678.94	676.401	669.876	727.44	729.171	691.429	699.609	796.853	705.179	627.474	689.718	0.0699507	0.352982	0.671764		-0.0423466	0.234151	0.755359		-0.141726	0.486956	0.441681		0.030796	0.185674	0.902645
sp|P35573|GDE_HUMAN	AGL	Glycogen debranching enzyme OS=Homo sapiens OX=9606 GN=AGL PE=1 SV=3	3587	9	327.543	339.466	323.626	341.377	342.073	328.595	324.75	331.046	318.957	330.379	356.893	352.624	358.422	342.419	355.091	378.837	0.0965993	1.99324	0.0814462		0.106682	0.947843	0.285099		-0.00517981	0.0610571	0.926451		-0.0269894	0.464235	0.726528
sp|Q9BSE5|SPEB_HUMAN	AGMAT	Agmatinase, mitochondrial OS=Homo sapiens OX=9606 GN=AGMAT PE=1 SV=2	4120	8	528.174	515.693	535.144	554.559	380.639	481.656	442.729	522.403	584.104	540.003	479.324	511.185	586.306	562.008	536.597	589.913	-0.025865	0.0998241	0.903719		0.0769455	0.743628	0.378957		-0.300415	1.05672	0.146505		0.0400868	0.297841	0.83701
sp|Q6ZNB7|ALKMO_HUMAN	AGMO	Alkylglycerol monooxygenase OS=Homo sapiens OX=9606 GN=AGMO PE=1 SV=1	6793	2	400.063	431.365	395.589	383.816	299.868	296.513	298.663	402.21	458.772	407.708	250.956	302.171	377.359	364.948	363.245	339.95	-0.395476	0.852949	0.332473		-0.17707	1.81245	0.105633		-0.431408	2.97076	0.00618095	+	0.0693658	0.411267	0.759194
sp|Q9UL18|AGO1_HUMAN	AGO1	Protein argonaute-1 OS=Homo sapiens OX=9606 GN=AGO1 PE=1 SV=3	1954	4	89.6497	85.0899	96.2009	92.438	97.7167	100.231	98.1367	81.4495	99.8474	88.9458	114.805	113.8	100.145	86.6089	98.8274	105.415	0.269231	1.52858	0.135292		0.0905225	0.39845	0.613937		0.120929	1.36809	0.0828964		-0.01577	0.0570874	0.97231
sp|Q9UKV8|AGO2_HUMAN	AGO2	Protein argonaute-2 OS=Homo sapiens OX=9606 GN=AGO2 PE=1 SV=3	1954	8	1408.78	1459.99	1429.88	1419.13	1660.41	1632.03	1633.07	1414.7	1455.19	1453.2	1482.85	1507.87	1522.01	1552.62	1451.33	1485.35	0.0736278	2.23539	0.0630503		0.0656347	0.869966	0.315839		0.199938	4.51873	0.000273973	+	0.0116526	0.272075	0.852615
sp|Q9H9G7|AGO3_HUMAN	AGO3	Protein argonaute-3 OS=Homo sapiens OX=9606 GN=AGO3 PE=1 SV=2	1954	7	339.283	354.857	354.51	359.125	389.888	365.303	383.855	338.224	368.448	362.218	406.901	415.768	350.93	346.364	372.543	386.821	0.14887	0.72765	0.393962		0.0654441	0.529764	0.509662		0.109228	1.43095	0.0741543		0.0170896	0.148177	0.926103
sp|Q99943|PLCA_HUMAN	AGPAT1	1-acyl-sn-glycerol-3-phosphate acyltransferase alpha OS=Homo sapiens OX=9606 GN=AGPAT1 PE=1 SV=2	6474	1	42.3765	38.4323	35.842	36.0241	39.8918	33.6943	38.0402	31.7566	37.221	33.8365	33.1225	40.0489	39.0097	35.5945	39.8438	32.5907	-0.031247	0.109502	0.89569		-0.0855593	0.348463	0.654749		-0.0370088	0.150694	0.814514		-0.155131	0.843457	0.522708
sp|Q9NRZ7-3|PLCC_HUMAN	AGPAT3	Isoform 3 of 1-acyl-sn-glycerol-3-phosphate acyltransferase gamma OS=Homo sapiens OX=9606 GN=AGPAT3	4240	3	966.987	1071.31	1031.61	1003.7	1016.73	1097.75	1047.06	1012.51	1054.85	1071.54	1110.81	1186.29	1343.66	1165.38	1215.46	1158.8	0.249453	1.12725	0.234477		0.213019	2.56917	0.0457925	+	0.0496509	0.492778	0.435751		0.039594	0.439449	0.740178
sp|Q9NUQ2|PLCE_HUMAN	AGPAT5	1-acyl-sn-glycerol-3-phosphate acyltransferase epsilon OS=Homo sapiens OX=9606 GN=AGPAT5 PE=1 SV=3	3325	3	619.085	663.739	610.655	643.64	534.757	671.762	685.871	604.653	657.947	647.214	650.965	733.074	696.717	666.597	648.274	664.397	0.128029	0.985262	0.281006		0.0574801	0.897844	0.306241		-0.0160843	0.0442688	0.947755		0.00509928	0.0373742	0.983167
sp|O00116|ADAS_HUMAN	AGPS	Alkyldihydroxyacetonephosphate synthase, peroxisomal OS=Homo sapiens OX=9606 GN=AGPS PE=1 SV=1	527	9	861.624	890.748	840.665	854.936	969.7	940.737	916.975	844.438	835.302	860.862	838.935	838.083	921.084	927.991	937.126	917.213	0.00563917	0.0382387	0.960167		0.105848	2.33649	0.0575446		0.128715	1.94632	0.03188	+	-0.025332	0.529497	0.687857
sp|O95994|AGR2_HUMAN	AGR2	Anterior gradient protein 2 homolog OS=Homo sapiens OX=9606 GN=AGR2 PE=1 SV=1	7172	1	49.426	44.3991	41.1771	39.1453	39.7163	53.7681	44.2645	44.4599	47.1864	44.2229	68.6475	68.935	66.246	54.9856	51.2361	51.5649	0.647472	2.67607	0.0344211	+	0.277581	1.60275	0.132254		0.0709235	0.18021	0.777898		0.061936	0.320739	0.821982
sp|O00468-3|AGRIN_HUMAN	AGRN	Isoform 3 of Agrin OS=Homo sapiens OX=9606 GN=AGRN	2309	11	428.644	383.22	454.501	465.323	610.05	621.393	580.318	450.061	470.95	460.608	403.488	436.099	399.948	437.493	444.459	443.256	-0.0644526	0.370899	0.659571		0.0330329	0.197291	0.789655		0.483642	2.72839	0.00919101	+	0.0929608	0.626084	0.632045
sp|Q6RW13|ATRAP_HUMAN	AGTRAP	Type-1 angiotensin II receptor-associated protein OS=Homo sapiens OX=9606 GN=AGTRAP PE=1 SV=1	6646	3	200.473	227.459	213.098	209.368	188.445	172.836	183.688	205.587	235.908	195.737	221.674	214.844	199.177	222.533	224.748	225.834	-0.00471634	0.0267405	0.973035		0.0792203	0.899579	0.305301		-0.226375	2.07227	0.0261545	+	-0.00434645	0.0158117	0.993782
sp|Q8WYP5-2|ELYS_HUMAN	AHCTF1	Isoform 2 of Protein ELYS OS=Homo sapiens OX=9606 GN=AHCTF1	442	18	1529.73	1382.2	1503.63	1437.86	1601.55	1747.11	1765.24	1428.08	1259.5	1305.37	1572.46	1578.84	1369.49	1330.23	1271.33	1497.71	0.040355	0.201525	0.812601		-0.10123	0.541165	0.500343		0.219947	1.78024	0.0405431	+	-0.137692	0.976304	0.461343
sp|P23526|SAHH_HUMAN	AHCY	Adenosylhomocysteinase OS=Homo sapiens OX=9606 GN=AHCY PE=1 SV=4	1723	12	1107.71	1090.33	1130.82	1156.89	1110.44	1086.42	1078.59	1114.1	1093.73	1123.82	1087.74	1099.76	1096.12	1103.81	1151.59	1124.82	-0.0346821	0.804065	0.355412		0.00694625	0.0983383	0.895903		-0.0383716	0.825559	0.225094		-0.0138094	0.254516	0.862927
sp|O43865|SAHH2_HUMAN	AHCYL1	S-adenosylhomocysteine hydrolase-like protein 1 OS=Homo sapiens OX=9606 GN=AHCYL1 PE=1 SV=2	4567	2	158.127	153.471	178.862	165.979	152.462	141.883	157.149	182.153	205.467	192.396	178.287	168.443	152.141	153.798	179.639	187.353	0.0183993	0.0785007	0.925918		0.0784078	0.316139	0.683157		-0.123796	0.934911	0.184222		0.237154	1.67857	0.212811
sp|Q96HN2|SAHH3_HUMAN	AHCYL2	Adenosylhomocysteinase 3 OS=Homo sapiens OX=9606 GN=AHCYL2 PE=1 SV=1	4567	6	740.785	816.833	781.447	726.635	782.946	726.341	800.19	1013.9	1001.68	893.271	801.329	789.42	814.162	847.169	762.857	717.561	0.0662158	0.737767	0.389904		0.0157693	0.0679619	0.927962		0.0066821	0.0401483	0.952932		0.338478	1.9812	0.141884
sp|Q5TGY3|AHDC1_HUMAN	AHDC1	AT-hook DNA-binding motif-containing protein 1 OS=Homo sapiens OX=9606 GN=AHDC1 PE=1 SV=1	199	2	65.9845	70.2804	75.5655	69.1728	58.5898	74.3036	69.8988	68.8953	72.4556	70.7495	64.386	76.6149	65.3594	58.7662	64.2238	70.3989	-0.0332066	0.132951	0.872024		-0.126246	0.634874	0.440786		-0.0610124	0.204672	0.747779		0.010612	0.0826382	0.959193
sp|Q09666|AHNK_HUMAN	AHNAK	Neuroblast differentiation-associated protein AHNAK OS=Homo sapiens OX=9606 GN=AHNAK PE=1 SV=2	882	14	1272.32	1311.6	1216.99	1164.05	1446.63	1427.25	1423.41	1224.3	1202.85	1230.12	1246.31	1290.87	1300.01	1382.93	1315.27	1365.23	0.0445282	0.461228	0.583924		0.127095	1.43743	0.158929		0.208114	1.99257	0.0292128	+	-0.0245772	0.246175	0.867357
sp|Q8IVF2|AHNK2_HUMAN	AHNAK2	Protein AHNAK2 OS=Homo sapiens OX=9606 GN=AHNAK2 PE=1 SV=2	341	17	2102.6	2004.14	2032.1	2069.73	2576.38	2570.14	2538.69	2050.39	2028.98	2087.44	1987.75	2015.02	2046.59	2035.37	2058.72	2025.71	-0.0251754	0.599983	0.473055		-0.00840414	0.194326	0.792646		0.320199	4.40366	0.00045	+	0.00256966	0.046141	0.977942
sp|P35869|AHR_HUMAN	AHR	Aryl hydrocarbon receptor OS=Homo sapiens OX=9606 GN=AHR PE=1 SV=2	7464	1	16.0834	18.8572	13.8267	16.1574	19.5914	18.5465	21.868	17.3456	16.0479	16.9076	18.7617	16.1417	14.489	18.4236	19.1563	24.9213	0.0210954	0.0515173	0.95137		0.355499	0.988924	0.271881		0.306645	1.34899	0.085069		0.0547904	0.218286	0.884123
sp|O95433|AHSA1_HUMAN	AHSA1	Activator of 90 kDa heat shock protein ATPase homolog 1 OS=Homo sapiens OX=9606 GN=AHSA1 PE=1 SV=1	791	8	620.324	633.656	637.148	646.12	646.861	611.156	602.694	670.955	635.72	636.178	634.908	573.453	611.852	625.89	667.466	667.46	-0.0652363	0.577725	0.49039		0.0427236	0.522442	0.513384		-0.0328974	0.38936	0.542121		0.0296412	0.423279	0.750919
sp|Q96BJ3|AIDA_HUMAN	AIDA	Axin interactor, dorsalization-associated protein OS=Homo sapiens OX=9606 GN=AIDA PE=1 SV=1	3811	4	674.265	662.786	708.186	689.126	698.607	685.953	755.776	582.479	628.724	617.913	707.282	678.015	607.382	657.412	649.941	653.26	-0.0439531	0.238236	0.774749		-0.0644341	1.3093	0.184754		0.0608277	0.532756	0.399675		-0.165343	1.74361	0.191717
sp|O95831|AIFM1_HUMAN	AIFM1	Apoptosis-inducing factor 1, mitochondrial OS=Homo sapiens OX=9606 GN=AIFM1 PE=1 SV=1	402	11	1300.03	1246.89	1351.63	1422.49	957.665	1496.53	1192.13	1513.43	1336.89	1613.34	1142.08	1256.02	1307.24	1159.54	1102.56	1205.27	-0.10765	0.6884	0.417073		-0.202077	1.83175	0.104404		-0.152414	0.30037	0.633619		0.158918	0.763949	0.558917
sp|Q9BRQ8|AIFM2_HUMAN	AIFM2	Apoptosis-inducing factor 2 OS=Homo sapiens OX=9606 GN=AIFM2 PE=1 SV=1	6217	4	136.027	123.093	132.484	125.535	130.173	131.43	127.426	122.849	117.355	133.408	129.03	112.656	112.047	118.65	118.509	132.818	-0.134809	0.774863	0.372279		-0.069001	0.45573	0.566247		0.00540744	0.0515862	0.938113		-0.0548506	0.352661	0.801222
sp|Q12904-2|AIMP1_HUMAN	AIMP1	Isoform 2 of Aminoacyl tRNA synthase complex-interacting multifunctional protein 1 OS=Homo sapiens OX=9606 GN=AIMP1	3051	7	429.25	334.243	461.022	479.97	335.173	392.362	372.133	407.45	393.093	428.736	370.37	313.32	327.728	335.871	319.765	306.538	-0.327923	1.17979	0.216292		-0.397295	1.42969	0.159156		-0.206654	0.717826	0.275417		-0.0437627	0.13003	0.93459
sp|Q13155|AIMP2_HUMAN	AIMP2	Aminoacyl tRNA synthase complex-interacting multifunctional protein 2 OS=Homo sapiens OX=9606 GN=AIMP2 PE=1 SV=2	589	6	315.14	295.213	315.002	317.195	293.071	299.528	320.644	305.543	293.931	313.96	296.868	303.129	290.878	313.565	288.806	287.97	-0.0645642	1.07645	0.252741		-0.0663588	0.615063	0.452173		-0.0296489	0.252268	0.690888		-0.0288088	0.325003	0.819384
sp|O00170|AIP_HUMAN	AIP	AH receptor-interacting protein OS=Homo sapiens OX=9606 GN=AIP PE=1 SV=2	1856	8	1265.52	1277.31	1302.79	1246.53	1305.88	1296.96	1257.98	1298.28	1205.73	1251.46	1283.94	1224.21	1216.86	1251.28	1222.3	1268.41	-0.0362263	0.552731	0.509158		-0.0294155	0.660655	0.426935		0.0156648	0.301089	0.632534		-0.0247167	0.284755	0.843929
sp|Q96IF1|AJUBA_HUMAN	AJUBA	LIM domain-containing protein ajuba OS=Homo sapiens OX=9606 GN=AJUBA PE=1 SV=1	2447	5	221.284	203.009	205.95	189.656	168.967	172.49	177.038	201.172	192.325	208.076	199.141	202.95	187.7	209.389	194.018	190.168	-0.0588327	0.457644	0.587749		-0.0500636	0.338958	0.662279		-0.244176	2.09977	0.0246721	+	-0.0302517	0.211789	0.889504
tr|Q5T9B7|Q5T9B7_HUMAN	AK1	Adenylate kinase isoenzyme 1 OS=Homo sapiens OX=9606 GN=AK1 PE=1 SV=1	3302	8	535.962	561.221	554.078	553.087	554.227	571.652	549.248	558.615	528.223	540.898	587.024	555.769	552.654	578.037	566.751	569.259	0.03602	0.48099	0.565523		0.0522468	1.56005	0.139261		0.0189501	0.35302	0.579197		-0.0226211	0.335852	0.812641
sp|P54819|KAD2_HUMAN	AK2	Adenylate kinase 2, mitochondrial OS=Homo sapiens OX=9606 GN=AK2 PE=1 SV=2	2666	7	598.143	562.514	585.539	620.446	604.455	615.85	595.861	576.267	569.917	583.741	614.173	623.693	646.616	585.459	606.78	596.764	0.0869342	1.1858	0.214493		0.0121048	0.135585	0.855522		0.0338674	0.449047	0.479525		-0.0362567	0.501207	0.708035
sp|Q9UIJ7|KAD3_HUMAN	AK3	GTP:AMP phosphotransferase AK3, mitochondrial OS=Homo sapiens OX=9606 GN=AK3 PE=1 SV=4	3483	3	341.182	354.694	340.833	345.954	303.532	368.598	338.319	380.795	358.101	346.441	349.918	364.683	373.489	402.701	329.526	361.293	0.0690515	0.956935	0.290496		0.0718998	0.317452	0.682012		-0.0417634	0.180808	0.777386		0.0648065	0.617839	0.639839
sp|P27144|KAD4_HUMAN	AK4	Adenylate kinase 4, mitochondrial OS=Homo sapiens OX=9606 GN=AK4 PE=1 SV=1	3235	6	1704.19	1756.74	1663.72	1646.47	1813.36	2433.81	2218.12	1631.83	1637.88	1739.93	1713.56	1905.4	1986.09	1936.37	1748.45	1825.91	0.140063	0.831277	0.340485		0.117072	1.03723	0.254182		0.338129	0.956522	0.176968		-0.0198274	0.209574	0.89046
sp|Q9Y3D8|KAD6_HUMAN	AK6	Adenylate kinase isoenzyme 6 OS=Homo sapiens OX=9606 GN=AK6 PE=1 SV=1	5498	2	132.577	136.339	136.513	141.465	136.958	140.806	130.303	123.667	142.666	130.513	131.566	92.4557	114.245	137.966	134.482	111.968	-0.292627	0.733821	0.390676		-0.099274	0.39172	0.619982		-0.00777387	0.0708688	0.915552		-0.0497796	0.300744	0.835749
sp|Q96M32|KAD7_HUMAN	AK7	Adenylate kinase 7 OS=Homo sapiens OX=9606 GN=AK7 PE=1 SV=3	7927	1	7.76873	8.85655	8.53513	5.99074	8.82185	7.71105	6.82833	9.83731	7.70844	8.22327	9.62172	7.59361	5.70361	3.68553	9.8743	10.6381	-0.0441574	0.0598551	0.945081		-0.0795697	0.0512954	0.94293		0.00803772	0.0162542	0.979601		0.149662	0.391273	0.773137
sp|Q92667|AKAP1_HUMAN	AKAP1	A-kinase anchor protein 1, mitochondrial OS=Homo sapiens OX=9606 GN=AKAP1 PE=1 SV=1	2428	10	648.469	676.133	639.813	643.254	542.314	601.495	604.224	670.704	636.737	662.15	665.672	653.531	680.225	674.869	673.398	674.527	0.0320139	0.600364	0.473104		0.0489685	1.13538	0.221288		-0.163424	1.14848	0.123863		0.0101647	0.129612	0.934537
sp|O43572|AKA10_HUMAN	AKAP10	A-kinase anchor protein 10, mitochondrial OS=Homo sapiens OX=9606 GN=AKAP10 PE=1 SV=2	1824	4	56.5702	61.8912	56.598	60.046	60.7872	44.7039	59.1646	51.2847	58.3962	53.7592	69.5599	59.6865	54.8781	59.2571	50.1355	52.5271	0.0564814	0.196079	0.816268		-0.125521	0.667055	0.42394		-0.111181	0.285976	0.648715		-0.110511	0.76812	0.557396
sp|Q9UKA4|AKA11_HUMAN	AKAP11	A-kinase anchor protein 11 OS=Homo sapiens OX=9606 GN=AKAP11 PE=1 SV=1	621	12	640.203	664.812	641.389	642.264	608.664	575.552	580.418	662.596	640.947	668.125	620.154	595.366	578.423	597.822	610.971	618.391	-0.114451	1.38247	0.163219		-0.0875141	2.11618	0.077791		-0.138066	1.80778	0.0379956	+	0.0221904	0.419221	0.753766
sp|Q02952|AKA12_HUMAN	AKAP12	A-kinase anchor protein 12 OS=Homo sapiens OX=9606 GN=AKAP12 PE=1 SV=4	1347	15	718.178	661.395	753.222	772.914	669.198	591.368	640.636	725.709	683.439	718.775	732.191	712.539	647.131	805.989	855.217	740.79	-0.0585602	0.334265	0.689398		0.140396	0.852472	0.322978		-0.196311	1.35418	0.0843001		-0.0323945	0.227352	0.879065
sp|Q12802-2|AKP13_HUMAN	AKAP13	Isoform 2 of A-kinase anchor protein 13 OS=Homo sapiens OX=9606 GN=AKAP13	839	13	1139.69	1058.65	1163.49	1111.07	1235.76	1144.02	1175.57	1228.04	1131.67	1231.33	1169.79	1092.28	1036.97	1130.24	1097.78	1155.52	-0.0249967	0.158476	0.848781		0.0129346	0.132748	0.858479		0.0839715	0.923298	0.187937		0.0980239	0.921654	0.48842
sp|Q02040|AK17A_HUMAN	AKAP17A	A-kinase anchor protein 17A OS=Homo sapiens OX=9606 GN=AKAP17A PE=1 SV=2	4873	2	90.8751	90.2497	93.4892	82.9519	90.086	97.5308	90.812	89.3303	92.1118	78.549	89.6067	92.7854	93.0454	87.044	87.5459	85.8288	0.0397593	0.413866	0.620546		-0.0409717	0.450515	0.570616		0.0546274	0.464402	0.464066		-0.0466776	0.223695	0.880724
sp|Q9Y2D5-4|AKAP2_HUMAN	AKAP2	Isoform 3 of A-kinase anchor protein 2 OS=Homo sapiens OX=9606 GN=AKAP2	3519	6	811.701	822.021	806.448	844.206	1016.59	1075.02	1076.53	836.583	800.578	910.464	1000.85	1091.41	931.799	921.167	982.856	1016.13	0.293106	1.38227	0.163149		0.244494	1.73524	0.115512		0.362766	2.97365	0.00621053	+	0.0467258	0.314584	0.827164
sp|O43823|AKAP8_HUMAN	AKAP8	A-kinase anchor protein 8 OS=Homo sapiens OX=9606 GN=AKAP8 PE=1 SV=1	5407	7	616.124	613.629	628.434	595.196	636.013	593.752	601.465	610.49	620.661	639.196	620.153	669.816	575.412	577.109	660.239	626.528	0.017233	0.0893763	0.915382		0.016642	0.0967639	0.89683		-0.00729591	0.072895	0.913882		0.0235821	0.398553	0.769124
sp|Q9ULX6|AKP8L_HUMAN	AKAP8L	A-kinase anchor protein 8-like OS=Homo sapiens OX=9606 GN=AKAP8L PE=1 SV=4	4986	5	199.436	201.779	192.42	205.354	184.929	181.984	183.008	196.64	221.489	198.501	184.899	190.671	187.083	197.505	210.439	190.073	-0.0906014	1.87612	0.0894475		-0.00382016	0.0265017	0.96997		-0.123539	2.26626	0.0185674	+	0.0395443	0.254812	0.8625
sp|Q99996-6|AKAP9_HUMAN	AKAP9	Isoform 6 of A-kinase anchor protein 9 OS=Homo sapiens OX=9606 GN=AKAP9	1036	19	1486.54	1483.88	1521.28	1518.67	1588.58	1481.51	1496.71	1536.7	1505.05	1514.33	1445.6	1386.11	1366.93	1441.2	1541.35	1535.82	-0.102807	1.43495	0.152229		0.00280134	0.0274116	0.969582		0.0181769	0.202338	0.749892		0.0154189	0.531274	0.686758
sp|P14550|AK1A1_HUMAN	AKR1A1	Aldo-keto reductase family 1 member A1 OS=Homo sapiens OX=9606 GN=AKR1A1 PE=1 SV=3	4219	8	466.639	454.991	441.067	457.574	473.602	440.431	454.975	429.468	467.071	440.459	495.634	491.712	495.158	459.339	462.27	462.645	0.119206	2.33217	0.0557524		0.0202799	0.498675	0.530464		0.00367253	0.0353221	0.958824		-0.0307202	0.303883	0.833946
sp|P15121|ALDR_HUMAN	AKR1B1	Aldo-keto reductase family 1 member B1 OS=Homo sapiens OX=9606 GN=AKR1B1 PE=1 SV=3	4219	6	783.639	780.916	748.906	756.567	822.743	784.781	737.692	806.183	790.737	751.53	699.876	632.11	650.564	698.479	734.919	726.316	-0.216914	1.57936	0.125387		-0.0924358	1.5431	0.140182		0.0253479	0.191703	0.76327		0.028143	0.328164	0.81689
sp|O60218|AK1BA_HUMAN	AKR1B10	Aldo-keto reductase family 1 member B10 OS=Homo sapiens OX=9606 GN=AKR1B10 PE=1 SV=2	2316	3	278.924	266.882	282.88	267.538	305.628	282.101	255.182	328.981	314.641	285.981	254.882	246.152	239.853	264.834	313.012	306.121	-0.150159	2.06387	0.0790131		0.101134	0.506856	0.523552		0.032503	0.146866	0.819015		0.175208	1.07054	0.426631
sp|C9JRZ8-2|AK1BF_HUMAN	AKR1B15	Isoform 2 of Aldo-keto reductase family 1 member B15 OS=Homo sapiens OX=9606 GN=AKR1B15	2316	1	11.5349	10.4372	20.3352	69.2753	931.786	620.177	67.9667	1.88096	14.4758	9.98869	9.4992	5.8042	3.55464	7.11844	0	5.52493	-1.80474	1.2002	0.210684		-1.69418	1.15465	0.218227		4.06611	1.28338	0.0955786		-1.64716	0.671975	0.609424
sp|Q04828|AK1C1_HUMAN	AKR1C1	Aldo-keto reductase family 1 member C1 OS=Homo sapiens OX=9606 GN=AKR1C1 PE=1 SV=1	1962	6	631.634	712.337	668.338	642.135	745.634	658.02	680.407	762.349	714.36	670.516	525.95	525.478	463.657	545.723	501.749	535.439	-0.394904	2.13428	0.0715181		-0.330157	2.76188	0.0414933	+	0.0655566	0.420098	0.510635		0.108682	0.75423	0.564423
sp|P52895|AK1C2_HUMAN	AKR1C2	Aldo-keto reductase family 1 member C2 OS=Homo sapiens OX=9606 GN=AKR1C2 PE=1 SV=3	1962	2	168.823	178.491	160.764	188.131	170.481	148.704	175.914	199.879	168.31	167.051	133.757	125.871	119.988	138.596	122.409	132.306	-0.458861	2.9726	0.0282759	+	-0.408187	2.53489	0.0478393	+	-0.0780363	0.361341	0.57085		0.0331676	0.122209	0.939769
sp|P42330|AK1C3_HUMAN	AKR1C3	Aldo-keto reductase family 1 member C3 OS=Homo sapiens OX=9606 GN=AKR1C3 PE=1 SV=4	1962	6	391.258	405.163	397.797	403.75	408.389	351.584	385.532	418.498	428.725	410.293	404.62	415.341	354.269	383.322	370.303	378.964	-0.0327929	0.160325	0.848155		-0.081588	1.96434	0.090902		-0.067808	0.404261	0.526005		0.0692799	1.40495	0.301495
sp|P17516|AK1C4_HUMAN	AKR1C4	Aldo-keto reductase family 1 member C4 OS=Homo sapiens OX=9606 GN=AKR1C4 PE=1 SV=3	1962	4	792.582	767.534	778.079	801.257	831.562	660.822	662.719	829.736	700.144	764.368	613.493	476.96	657.574	684.755	600.085	597.824	-0.442887	1.06301	0.256414		-0.325418	1.49207	0.148385		-0.136082	0.467635	0.460951		-0.0407194	0.203827	0.893008
sp|Q96JD6-4|AKCL2_HUMAN	AKR1E2	Isoform 4 of 1,5-anhydro-D-fructose reductase OS=Homo sapiens OX=9606 GN=AKR1E2	4219	1	81.7203	81.5751	76.4621	79.551	90.2852	120.428	114.578	83.2118	85.4688	87.0072	114.789	101.917	134.216	103.567	107.74	122.16	0.542545	1.4219	0.154844		0.474529	1.8156	0.106053		0.431253	1.13035	0.12764		0.0947449	1.64356	0.223196
sp|O43488|ARK72_HUMAN	AKR7A2	Aflatoxin B1 aldehyde reductase member 2 OS=Homo sapiens OX=9606 GN=AKR7A2 PE=1 SV=3	703	6	512.846	538.241	545.633	552.469	553.605	534.235	529.485	518.569	522.966	527.813	576.523	565.292	531.088	534.372	531.695	531.837	0.0532912	0.542987	0.517048		-0.0120081	0.19007	0.796366		0.00515651	0.0590488	0.928897		-0.0380572	0.686955	0.603145
sp|O95154|ARK73_HUMAN	AKR7A3	Aflatoxin B1 aldehyde reductase member 3 OS=Homo sapiens OX=9606 GN=AKR7A3 PE=1 SV=2	703	6	372.471	365.059	376.085	386.145	357.861	340.537	353.269	385.112	351.877	369.54	459.091	439.069	424.529	404.838	403.135	397.322	0.233332	2.12576	0.0730381		0.0999407	2.29706	0.0605679		-0.0970388	1.65725	0.0500985		-0.0243382	0.222498	0.881305
sp|P31749|AKT1_HUMAN	AKT1	RAC-alpha serine/threonine-protein kinase OS=Homo sapiens OX=9606 GN=AKT1 PE=1 SV=2	3947	1	195.301	184.789	188.362	204.8	198.23	201.232	210.245	199.186	178.325	210.294	219.928	205.687	224.353	203.594	197.747	200.484	0.164592	1.587	0.12412		0.0544539	0.705518	0.4002		0.0728767	0.85775	0.212913		0.0171855	0.0763482	0.962985
sp|Q96B36-3|AKTS1_HUMAN	AKT1S1	Isoform 3 of Proline-rich AKT1 substrate 1 OS=Homo sapiens OX=9606 GN=AKT1S1	5291	1	197.119	231.214	236.748	216.572	181.787	178.685	172.761	225.943	206.844	223.374	235.13	224.015	188.037	216.854	230.317	233.644	-0.0339335	0.105752	0.899102		0.0449286	0.268115	0.724218		-0.307142	2.01815	0.0283161	+	-0.0086359	0.0416398	0.980902
sp|P31751|AKT2_HUMAN	AKT2	RAC-beta serine/threonine-protein kinase OS=Homo sapiens OX=9606 GN=AKT2 PE=1 SV=2	3947	7	551.754	579.132	607.017	602.251	530.45	493.49	523.035	536.187	564.541	558.441	558.834	554.172	559.726	543.094	585.039	570.476	-0.0683466	0.929226	0.299525		-0.0468712	0.46456	0.558957		-0.18179	1.96844	0.0300545	+	-0.0804317	1.0278	0.444182
sp|Q9Y243|AKT3_HUMAN	AKT3	RAC-gamma serine/threonine-protein kinase OS=Homo sapiens OX=9606 GN=AKT3 PE=1 SV=1	3947	2	128.706	135.685	137.021	137.26	158.027	132.792	130.27	130.231	144.091	131.179	135.49	123.874	126.848	133.932	124.27	128.494	-0.0655254	0.638655	0.44929		-0.0633523	0.756119	0.372374		0.0547025	0.218965	0.729137		0.00428439	0.0270752	0.986241
sp|Q9H8T0-2|AKTIP_HUMAN	AKTIP	Isoform 2 of AKT-interacting protein OS=Homo sapiens OX=9606 GN=AKTIP	6963	1	135.763	146.429	149.246	142.399	169.133	157.701	148.751	144.625	151.094	128.231	155.936	157.103	161.277	147.258	162.704	159.657	0.141004	1.94433	0.0848541		0.12546	1.08202	0.239379		0.143019	1.01886	0.157993		-0.0242279	0.110732	0.948055
sp|P13716-2|HEM2_HUMAN	ALAD	Isoform 2 of Delta-aminolevulinic acid dehydratase OS=Homo sapiens OX=9606 GN=ALAD	1618	3	163.018	158.256	164.364	162.638	164.318	144.814	156.972	164.278	163.154	159.536	205.03	176.909	182.074	162.178	176.029	149.545	0.211327	1.10351	0.244306		0.00152774	0.00690467	0.991024		-0.0627296	0.443585	0.4853		0.00228934	0.0453002	0.978228
sp|P13196|HEM1_HUMAN	ALAS1	5-aminolevulinate synthase, nonspecific, mitochondrial OS=Homo sapiens OX=9606 GN=ALAS1 PE=1 SV=2	1886	5	284.88	281.831	281.643	270.882	112.76	132.252	139.525	310.418	310.72	316.634	173.073	213.782	208.149	214.413	215.532	231.268	-0.502467	1.50096	0.13912		-0.344892	2.42735	0.056		-1.13182	2.26447	0.0186038	+	0.160035	3.28828	0.0175	+
sp|Q13740|CD166_HUMAN	ALCAM	CD166 antigen OS=Homo sapiens OX=9606 GN=ALCAM PE=1 SV=2	2277	12	582.712	600.686	600.541	592.697	579.376	604.111	669.392	600.19	590.276	615.239	635.614	669.657	663.802	637.594	594.995	628.382	0.143371	1.87474	0.0894364		0.0616479	0.770009	0.363474		0.0533171	0.317945	0.614767		0.0185807	0.378198	0.783068
sp|Q8IZ83|A16A1_HUMAN	ALDH16A1	Aldehyde dehydrogenase family 16 member A1 OS=Homo sapiens OX=9606 GN=ALDH16A1 PE=1 SV=2	152	5	227.646	206.263	221.385	239.824	218.273	206.329	222.343	203.002	223.788	212.012	256.9	227.378	230.691	239.476	247.757	233.652	0.0908011	0.568924	0.496377		0.104437	0.976415	0.276291		-0.0519969	0.404251	0.525921		-0.0706951	0.525027	0.690408
sp|P54886|P5CS_HUMAN	ALDH18A1	Delta-1-pyrroline-5-carboxylate synthase OS=Homo sapiens OX=9606 GN=ALDH18A1 PE=1 SV=2	412	10	823.218	902.05	856.961	860.25	690.862	856.909	875.909	874.118	885.665	947.915	729.538	769.78	854.204	785.176	739.053	772.882	-0.135947	0.776396	0.371397		-0.168303	2.15464	0.0740847		-0.09851	0.332744	0.599065		0.0684988	0.690552	0.601673
sp|P00352|AL1A1_HUMAN	ALDH1A1	Retinal dehydrogenase 1 OS=Homo sapiens OX=9606 GN=ALDH1A1 PE=1 SV=2	227	12	1432.25	1390.32	1452.88	1471.04	1511.34	1431.07	1436.24	1533.03	1439.28	1367.67	1378.58	1409.84	1553.17	1525.68	1485.24	1526.84	0.00894703	0.0532844	0.950781		0.074536	1.71397	0.119396		0.02271	0.296716	0.637665		0.00878804	0.0578285	0.972226
sp|O94788|AL1A2_HUMAN	ALDH1A2	Retinal dehydrogenase 2 OS=Homo sapiens OX=9606 GN=ALDH1A2 PE=1 SV=3	227	2	64.519	70.9439	71.2004	75.975	60.5601	75.0115	58.445	71.4377	73.6968	77.463	70.9391	83.3365	70.9828	71.5297	71.5522	73.5296	0.0858798	0.390679	0.639998		0.0335013	0.261597	0.730724		-0.134267	0.444254	0.484554		0.0721451	0.554421	0.674408
sp|P47895|AL1A3_HUMAN	ALDH1A3	Aldehyde dehydrogenase family 1 member A3 OS=Homo sapiens OX=9606 GN=ALDH1A3 PE=1 SV=2	227	2	79.1141	81.2156	85.3401	82.8012	85.5108	82.2662	83.4321	79.9928	78.1574	86.8572	83.6584	91.671	89.3364	82.7565	88.4064	92.0432	0.102933	1.00155	0.274217		0.0946364	0.810349	0.342783		0.0285279	0.444483	0.484334		-0.00884245	0.0580352	0.972586
sp|P30837|AL1B1_HUMAN	ALDH1B1	Aldehyde dehydrogenase X, mitochondrial OS=Homo sapiens OX=9606 GN=ALDH1B1 PE=1 SV=3	227	4	1156.59	1185.05	1080.72	1106.11	874.58	1085.27	1019.08	1127.73	1188.24	1212.46	974.781	1114.25	1207.36	1145.76	1022.11	1130.41	-0.0477187	0.182538	0.827668		-0.0431778	0.284254	0.709642		-0.194084	0.793012	0.240188		0.0553168	0.583453	0.659923
tr|A0A494C1M4|A0A494C1M4_HUMAN	ALDH1L2	10-formyltetrahydrofolate dehydrogenase OS=Homo sapiens OX=9606 GN=ALDH1L2 PE=1 SV=1	5613	3	81.4172	75.3912	82.1634	82.3051	48.9765	75.8944	79.5435	81.3133	86.0155	79.9541	73.3734	77.6122	86.5996	93.2319	90.8755	84.0207	-0.0228348	0.104375	0.899424		0.153685	1.28482	0.188065		-0.268859	0.455214	0.472987		0.0376182	0.362527	0.793742
sp|P05091|ALDH2_HUMAN	ALDH2	Aldehyde dehydrogenase, mitochondrial OS=Homo sapiens OX=9606 GN=ALDH2 PE=1 SV=2	227	11	650.137	659.823	612.659	594.381	520.523	673.241	642.175	663.044	653.147	677.039	594.479	666.532	770.087	692.241	627.689	674.743	0.0987834	0.335272	0.688787		0.0795637	0.662897	0.426148		-0.04764	0.140905	0.824612		0.0795933	0.96485	0.465467
sp|P30838|AL3A1_HUMAN	ALDH3A1	Aldehyde dehydrogenase, dimeric NADP-preferring OS=Homo sapiens OX=9606 GN=ALDH3A1 PE=1 SV=3	509	12	4003.63	3758.54	3604.42	3513.93	4157.97	3807.59	3643.44	4104.96	3581.39	3414.59	2244.67	2064.84	2604.13	2632.09	2719.54	2580.84	-0.695805	2.00877	0.0809426		-0.491113	3.57118	0.012898	+	0.0564362	0.334787	0.597602		-0.0103834	0.0386199	0.983028
tr|A0A5F9ZHN9|A0A5F9ZHN9_HUMAN	ALDH3A2	Aldehyde dehydrogenase family 3 member A2 OS=Homo sapiens OX=9606 GN=ALDH3A2 PE=4 SV=1	509	7	1875.35	2058.95	1853.07	1836.41	1864.83	1866.09	1846.93	2071.54	2009.18	1913.35	1552.31	1532.6	1773.67	1805.03	1778.27	1774.51	-0.23659	1.30595	0.178793		-0.0923292	1.03698	0.254039		-0.0342379	0.359471	0.572345		0.0688353	0.633013	0.630964
sp|P43353|AL3B1_HUMAN	ALDH3B1	Aldehyde dehydrogenase family 3 member B1 OS=Homo sapiens OX=9606 GN=ALDH3B1 PE=1 SV=1	509	4	354.19	369.701	334.933	363.241	286.992	290.212	291.814	433.873	425.606	453.9	369.071	423.93	414.807	354.084	346.88	416.175	0.177801	1.08056	0.25183		0.0629858	0.270259	0.723406		-0.294532	2.74716	0.0088906	+	0.300801	3.09569	0.027551	+
sp|P30038|AL4A1_HUMAN	ALDH4A1	Delta-1-pyrroline-5-carboxylate dehydrogenase, mitochondrial OS=Homo sapiens OX=9606 GN=ALDH4A1 PE=1 SV=3	3140	4	318.534	306.898	292.848	322.741	239.536	269.302	266.298	288.056	296.267	335.409	291.806	298.055	298.795	299.874	272.315	292.706	-0.0658525	0.903112	0.310187		-0.106072	0.952178	0.283577		-0.264931	1.71605	0.0457404	+	-0.0193777	0.0903807	0.956078
sp|P51649-2|SSDH_HUMAN	ALDH5A1	Isoform 2 of Succinate-semialdehyde dehydrogenase, mitochondrial OS=Homo sapiens OX=9606 GN=ALDH5A1	640	2	75.7411	79.4126	81.6012	86.6887	53.5137	73.1109	68.9029	68.3327	68.2951	85.7201	81.4926	91.0634	78.728	90.2509	77.7154	84.7836	0.0497528	0.260664	0.754526		0.0582561	0.31621	0.683156		-0.3222	0.868493	0.208734		-0.132389	0.454926	0.731949
sp|Q02252|MMSA_HUMAN	ALDH6A1	Methylmalonate-semialdehyde dehydrogenase [acylating], mitochondrial OS=Homo sapiens OX=9606 GN=ALDH6A1 PE=1 SV=2	1662	6	1884.51	1984.32	1940.14	1994.47	1464.26	2006.73	1808.35	2049.47	2028.58	2088.5	2015.96	2332.01	2398.99	2092.07	1979.75	2199.29	0.201406	0.938952	0.296138		0.098679	0.857337	0.320943		-0.160519	0.452632	0.475775		0.075646	1.68307	0.213312
tr|A0A1B0GW77|A0A1B0GW77_HUMAN	ALDH7A1	Alpha-aminoadipic semialdehyde dehydrogenase OS=Homo sapiens OX=9606 GN=ALDH7A1 PE=1 SV=1	4822	12	720.099	746.992	791.713	787.719	647.218	759.234	750.903	759.554	763.306	805.958	833.727	866.618	859.557	750.897	770.699	794.636	0.164868	2.04522	0.0796639		0.0203723	0.197225	0.78954		-0.0855124	0.426297	0.503756		0.0280529	0.267813	0.856257
sp|P49419-2|AL7A1_HUMAN	ALDH7A1	Isoform 2 of Alpha-aminoadipic semialdehyde dehydrogenase OS=Homo sapiens OX=9606 GN=ALDH7A1	4822	1	83.0839	94.6691	79.9944	79.538	54.0838	78.0007	71.6193	75.493	83.5065	77.7235	84.9647	99.7625	105.278	85.6115	72.3186	77.3507	0.194913	0.795983	0.359558		-0.10439	0.502034	0.527769		-0.325907	0.776507	0.247148		-0.0933907	0.591216	0.654294
sp|P49189-3|AL9A1_HUMAN	ALDH9A1	Isoform 3 of 4-trimethylaminobutyraldehyde dehydrogenase OS=Homo sapiens OX=9606 GN=ALDH9A1	1418	11	1786.89	1678.41	1775.28	1850.96	1687.3	1780.28	1765.15	1718.62	1690.47	1755.98	1672.82	1665.11	1668.27	1661.11	1680.67	1659.48	-0.0864657	1.22775	0.201408		-0.0879114	1.26347	0.193946		-0.0230127	0.244633	0.700304		-0.0415661	0.564027	0.66933
sp|P49189|AL9A1_HUMAN	ALDH9A1	4-trimethylaminobutyraldehyde dehydrogenase OS=Homo sapiens OX=9606 GN=ALDH9A1 PE=1 SV=3	1418	3	106.934	117.501	112.576	117.448	72.9326	101.503	112.849	108.558	116.992	120.603	102.09	119.797	119.542	111.625	104.042	113.148	-0.00042849	0.00163917	0.998062		-0.051733	0.456913	0.565109		-0.269562	0.537929	0.395679		0.0219685	0.147116	0.926588
tr|J3KPS3|J3KPS3_HUMAN	ALDOA	Fructose-bisphosphate aldolase OS=Homo sapiens OX=9606 GN=ALDOA PE=1 SV=1	494	1	54.2045	61.0209	54.5268	60.1548	51.4727	47.7963	54.5463	56.8127	62.1092	58.1979	38.6357	37.7552	31.1078	52.7005	50.0024	41.6218	-0.686212	2.02218	0.0801859		-0.261789	0.959166	0.281568		-0.164778	1.11041	0.132278		0.0398221	0.273654	0.852058
sp|P04075-2|ALDOA_HUMAN	ALDOA	Isoform 2 of Fructose-bisphosphate aldolase A OS=Homo sapiens OX=9606 GN=ALDOA	494	17	1161.67	1187.4	1197.19	1209.68	1480.01	1475.11	1426.51	1148.24	1139.29	1180.94	1261.24	1234.54	1125.57	1189.71	1115.32	1157.5	0.0202531	0.136528	0.869677		-0.043211	0.608496	0.456737		0.296735	3.80533	0.00111905	+	-0.040406	0.95561	0.472358
sp|P09972|ALDOC_HUMAN	ALDOC	Fructose-bisphosphate aldolase C OS=Homo sapiens OX=9606 GN=ALDOC PE=1 SV=2	494	8	391.181	409.973	412.835	397.915	850.187	807.274	779.479	379.212	360.11	395.521	528.846	487.318	454.839	430.56	446.98	426.813	0.280675	1.42261	0.15455		0.109662	1.90274	0.0979638		1.01077	3.85106	0.000917197	+	-0.0919488	0.89618	0.499484
sp|Q9BT22|ALG1_HUMAN	ALG1	Chitobiosyldiphosphodolichol beta-mannosyltransferase OS=Homo sapiens OX=9606 GN=ALG1 PE=1 SV=2	3935	5	432.601	473.048	435.376	412.933	432.238	447.08	465.112	409.873	452.948	442.488	438.631	466.345	511.67	476.396	485.736	458.776	0.105741	0.607004	0.470286		0.112576	1.16896	0.214392		0.0325141	0.258286	0.684239		-0.0107447	0.0631672	0.967677
sp|Q5BKT4|AG10A_HUMAN	ALG10	Dol-P-Glc:Glc(2)Man(9)GlcNAc(2)-PP-Dol alpha-1,2-glucosyltransferase OS=Homo sapiens OX=9606 GN=ALG10 PE=2 SV=1	2491	3	288.197	361.692	307.543	318.53	348.088	372.922	377.275	302.834	330.867	292.544	328.092	416.069	463.453	323.957	378.287	348.023	0.32594	0.846558	0.334811		0.136313	0.678307	0.417465		0.202806	1.26343	0.0992765		-0.0440312	0.198005	0.8959
sp|Q2TAA5|ALG11_HUMAN	ALG11	GDP-Man:Man(3)GlcNAc(2)-PP-Dol alpha-1,2-mannosyltransferase OS=Homo sapiens OX=9606 GN=ALG11 PE=1 SV=2	7175	3	189.907	202.758	178.702	183.498	198.237	173.226	183.034	187.894	175.321	185.569	191.077	196.849	202.108	188.307	208.714	206.477	0.0608636	0.60955	0.468683		0.092272	0.69547	0.406036		-0.0305952	0.166957	0.793547		-0.0439685	0.377502	0.783583
sp|Q9NP73-2|ALG13_HUMAN	ALG13	Isoform 2 of Putative bifunctional UDP-N-acetylglucosamine transferase and deubiquitinase ALG13 OS=Homo sapiens OX=9606 GN=ALG13	6446	2	65.5256	56.1699	63.3636	65.5373	55.6763	57.9844	65.1552	66.5697	62.0246	56.0651	64.9439	66.1768	62.5861	66.9204	67.2638	61.123	0.0459974	0.327605	0.695475		0.056874	0.347613	0.655498		-0.0722537	0.349679	0.582263		-0.0261868	0.105796	0.947905
sp|Q96F25|ALG14_HUMAN	ALG14	UDP-N-acetylglucosamine transferase subunit ALG14 homolog OS=Homo sapiens OX=9606 GN=ALG14 PE=1 SV=1	7037	1	18.2435	21.618	19.9804	22.0701	19.2783	18.3131	17.8669	17.3062	25.6127	15.8295	21.846	25.9816	25.0832	21.6988	26.3809	15.4434	0.24712	1.20655	0.208346		0.0179596	0.0245648	0.972487		-0.144359	0.984971	0.167811		-0.0931522	0.148526	0.926167
sp|Q9H553|ALG2_HUMAN	ALG2	Alpha-1,3/1,6-mannosyltransferase ALG2 OS=Homo sapiens OX=9606 GN=ALG2 PE=1 SV=1	6386	5	324.185	338.884	340.04	339.812	399.403	378.801	378.844	332.844	376.923	339.76	377.25	390.447	376.099	357.343	349.044	377.431	0.183574	3.10303	0.0266804	+	0.105298	1.17547	0.212805		0.199951	2.41981	0.0145531	+	0.0575315	0.385576	0.777437
sp|Q9Y673|ALG5_HUMAN	ALG5	Dolichyl-phosphate beta-glucosyltransferase OS=Homo sapiens OX=9606 GN=ALG5 PE=1 SV=1	1890	6	227.308	276.932	259.149	248.761	252.618	261.397	272.101	274.594	237.497	271.809	267.969	282.906	291.598	275.264	264.155	268.59	0.153109	1.08185	0.251444		0.0935215	0.66493	0.425248		0.0534335	0.330377	0.601972		0.0469203	0.202865	0.893451
sp|Q9Y672|ALG6_HUMAN	ALG6	Dolichyl pyrophosphate Man9GlcNAc2 alpha-1,3-glucosyltransferase OS=Homo sapiens OX=9606 GN=ALG6 PE=1 SV=2	7035	1	391.523	462.707	408.869	404.069	395.632	421.715	401.809	384.006	433.399	415.617	392.084	451.456	543.221	427.738	432.135	443.651	0.139403	0.376921	0.654442		0.0628525	0.48607	0.541374		-0.0340467	0.224198	0.723662		-0.0189993	0.0931674	0.956445
sp|Q9BVK2|ALG8_HUMAN	ALG8	Probable dolichyl pyrophosphate Glc1Man9GlcNAc2 alpha-1,3-glucosyltransferase OS=Homo sapiens OX=9606 GN=ALG8 PE=1 SV=2	6720	3	96.8776	104.55	96.0198	89.7724	66.8446	89.9242	112.811	83.0001	112.341	89.1384	75.8373	73.6175	132.536	103.729	91.7247	81.7712	-0.0958824	0.117581	0.887257		-0.0717552	0.252339	0.737608		-0.137853	0.225205	0.72257		-0.0399811	0.0988715	0.952606
sp|Q13686|ALKB1_HUMAN	ALKBH1	Nucleic acid dioxygenase ALKBH1 OS=Homo sapiens OX=9606 GN=ALKBH1 PE=1 SV=2	4705	2	52.5705	48.5996	49.5726	51.539	34.075	44.52	46.852	53.0616	52.3013	51.7453	40.2451	45.6251	47.3403	45.5715	41.9906	47.6606	-0.190365	0.994322	0.277043		-0.16727	1.16299	0.21639		-0.287175	0.750065	0.259046		0.0510462	0.846255	0.522953
sp|Q96Q83|ALKB3_HUMAN	ALKBH3	Alpha-ketoglutarate-dependent dioxygenase alkB homolog 3 OS=Homo sapiens OX=9606 GN=ALKBH3 PE=1 SV=1	7085	1	191.417	182.04	198.49	190.746	168.792	141.241	165.089	204.709	187.661	189.456	185.078	164.267	173.585	180.031	198.881	185.296	-0.130484	0.999043	0.274585		-0.0204293	0.151246	0.838459		-0.27154	1.17502	0.117274		0.0240987	0.193969	0.898558
sp|Q6P6C2-1|ALKB5_HUMAN	ALKBH5	Isoform 1 of RNA demethylase ALKBH5 OS=Homo sapiens OX=9606 GN=ALKBH5	930	1	130.553	117.167	140.715	146.535	144.763	159.539	153.163	108.899	123.572	137.432	125.739	130.511	112.831	115.736	124.835	119.368	-0.11805	0.570758	0.495517		-0.152214	0.920127	0.295025		0.193251	1.15916	0.121356		-0.118619	0.420123	0.753471
sp|Q3KRA9-2|ALKB6_HUMAN	ALKBH6	Isoform 2 of Alpha-ketoglutarate-dependent dioxygenase alkB homolog 6 OS=Homo sapiens OX=9606 GN=ALKBH6	5479	4	97.2793	94.9701	98.3337	98.1879	89.9216	89.2405	89.9891	96.5897	94.1628	93.8476	102.682	97.8428	86.745	93.1482	101.648	92.6472	-0.0249234	0.116483	0.8883		-0.0217809	0.173956	0.811594		-0.115337	2.95632	0.00627103	+	-0.0349272	0.963292	0.465402
sp|Q9BT30|ALKB7_HUMAN	ALKBH7	Alpha-ketoglutarate-dependent dioxygenase alkB homolog 7, mitochondrial OS=Homo sapiens OX=9606 GN=ALKBH7 PE=1 SV=1	4421	2	85.0104	114.856	90.1597	84.5554	49.5347	75.8138	66.3526	94.8253	94.53	94.1286	81.6233	73.921	96.3045	87.1319	84.4739	80.8493	-0.154587	0.443158	0.598013		-0.143129	0.572608	0.479445		-0.561759	1.17133	0.118334		0.0247825	0.0822679	0.959303
sp|Q96BT7-4|ALKB8_HUMAN	ALKBH8	Isoform 4 of Alkylated DNA repair protein alkB homolog 8 OS=Homo sapiens OX=9606 GN=ALKBH8	5511	1	146.745	154.787	140.085	155.739	126.515	119.345	126.382	136.276	132.464	138.358	139.267	134.718	129.71	133.75	144.44	147.216	-0.149562	1.62555	0.119204		-0.0746092	0.612638	0.453207		-0.266511	2.68622	0.0095	+	-0.137078	1.61679	0.230655
sp|Q8TCU4|ALMS1_HUMAN	ALMS1	Alstrom syndrome protein 1 OS=Homo sapiens OX=9606 GN=ALMS1 PE=1 SV=4	2016	11	839.895	827.789	900.214	896.112	783.639	769.77	837.33	800.063	788.976	836.418	809.636	813.581	720.291	758.623	773.912	783.301	-0.149975	0.996708	0.275798		-0.164982	2.07949	0.0828085		-0.119884	1.20191	0.111974		-0.0985817	1.23523	0.354308
sp|P09917|LOX5_HUMAN	ALOX5	Arachidonate 5-lipoxygenase OS=Homo sapiens OX=9606 GN=ALOX5 PE=1 SV=2	2679	1	29.2359	32.3582	29.492	26.2917	35.084	38.7679	32.9707	26.8077	21.8338	37.7523	36.0484	34.538	39.3911	34.632	38.5242	36.4027	0.322796	1.92982	0.0866127		0.318105	2.06105	0.0839083		0.279753	1.49649	0.0666328		-0.0606091	0.0859633	0.957282
sp|Q96QP1|ALPK1_HUMAN	ALPK1	Alpha-protein kinase 1 OS=Homo sapiens OX=9606 GN=ALPK1 PE=1 SV=3	215	3	84.1663	92.8391	93.0351	94.9742	86.863	83.4848	79.9123	82.6396	91.3837	76.8116	74.2439	85.683	82.7484	80.9179	86.6344	83.9841	-0.174984	1.0721	0.253417		-0.12115	1.26248	0.194328		-0.128764	1.24115	0.104116		-0.12829	0.67063	0.610888
sp|P05187|PPB1_HUMAN	ALPP	Alkaline phosphatase, placental type OS=Homo sapiens OX=9606 GN=ALPP PE=1 SV=2	1793	7	591.653	390.158	493.93	609.133	365.49	425.829	468.557	509.011	560.603	518.876	410.247	387.644	587.523	418.986	475.099	426.67	-0.178012	0.304281	0.71457		-0.223885	0.631484	0.443223		-0.297192	0.788464	0.242422		0.0433869	0.100165	0.951588
sp|Q96Q42|ALS2_HUMAN	ALS2	Alsin OS=Homo sapiens OX=9606 GN=ALS2 PE=1 SV=2	4198	2	340.786	326.576	326.689	360.538	364.897	323.96	347.432	364.01	350.94	317.172	340.143	352.427	356.942	348.675	335.089	342.071	0.0477966	0.544705	0.515659		0.0149858	0.149084	0.842159		0.02809	0.176163	0.783115		0.0215675	0.112713	0.946786
sp|Q60I27|AL2CL_HUMAN	ALS2CL	ALS2 C-terminal-like protein OS=Homo sapiens OX=9606 GN=ALS2CL PE=1 SV=1	3818	1	6.1431	11.2369	6.27184	8.85362	9.72921	10.4006	13.7352	9.76595	9.59111	10.3282	8.10303	11.378	8.22231	9.04139	10.7485	11.417	0.212653	0.340298	0.68422		0.395833	0.794251	0.352003		0.504167	0.958256	0.176208		0.329918	0.669964	0.610391
tr|E9PB61|E9PB61_HUMAN	ALYREF	THO complex subunit 4 OS=Homo sapiens OX=9606 GN=ALYREF PE=1 SV=1	1816	4	242.877	128.098	257.706	242.704	155.95	241.719	163.482	207.088	173.435	134.839	215.615	167.569	146.703	142.931	148.262	151.247	-0.268562	0.401807	0.630535		-0.510475	0.915692	0.297689		-0.196084	0.25428	0.688617		-0.311974	0.462992	0.727272
sp|Q9C0C7-5|AMRA1_HUMAN	AMBRA1	Isoform 5 of Activating molecule in BECN1-regulated autophagy protein 1 OS=Homo sapiens OX=9606 GN=AMBRA1	702	8	274.67	276.374	295.714	303.487	207.38	215.491	221.821	304.775	294.427	285.432	247.912	258.745	250.494	283.773	293.137	269.509	-0.187161	2.10532	0.0750648		-0.026991	0.211214	0.779226		-0.419439	3.59643	0.00231579	+	0.037061	0.349074	0.803379
tr|A0A5F9ZHD5|A0A5F9ZHD5_HUMAN	AMD1	S-adenosylmethionine decarboxylase proenzyme OS=Homo sapiens OX=9606 GN=AMD1 PE=4 SV=1	2565	2	196.419	191.608	183.767	187.024	144.133	144.587	137.207	176.777	196.284	176.087	195.076	190.883	192.103	183.709	161.583	164.09	0.0229032	0.428437	0.608669		-0.161903	1.02085	0.260731		-0.418067	3.95982	0.00102128	+	-0.0529112	0.379037	0.782394
sp|Q9Y303-3|NAGA_HUMAN	AMDHD2	Isoform 3 of N-acetylglucosamine-6-phosphate deacetylase OS=Homo sapiens OX=9606 GN=AMDHD2	729	4	127.4	124.809	129.969	138.944	136.859	124.122	118.269	139.292	122.865	131.958	146.007	145.385	122.373	129.7	132.309	114.626	0.0786275	0.341052	0.683682		-0.0550983	0.297909	0.698314		-0.0449326	0.246583	0.698329		0.0113155	0.0626939	0.96822
sp|Q9UKV5|AMFR_HUMAN	AMFR	E3 ubiquitin-protein ligase AMFR OS=Homo sapiens OX=9606 GN=AMFR PE=1 SV=2	2516	2	34.6845	41.0296	40.1224	43.4614	29.7568	32.9135	37.9598	39.167	34.6462	43.1891	30.902	35.9865	33.4501	30.9535	41.5587	45.7477	-0.249719	1.34167	0.170797		-0.029124	0.0531087	0.941941		-0.249984	0.931255	0.185148		-0.031107	0.0967798	0.954411
sp|Q86SJ2|AMGO2_HUMAN	AMIGO2	Amphoterin-induced protein 2 OS=Homo sapiens OX=9606 GN=AMIGO2 PE=1 SV=1	2291	2	248.2	266.43	253.205	242.7	454.048	464.064	405.609	365.02	378.975	334.903	303.105	270.567	287.85	233.172	294.721	260.222	0.184189	1.43451	0.152229		0.0506442	0.179503	0.805091		0.802901	2.84868	0.00721684	+	0.508422	2.55355	0.0661503
sp|Q9Y2J4-4|AMOL2_HUMAN	AMOTL2	Isoform 4 of Angiomotin-like protein 2 OS=Homo sapiens OX=9606 GN=AMOTL2	548	6	71.7617	62.1667	73.4945	83.1556	74.561	73.7435	80.3804	77.1869	70.1518	70.5048	60.1339	66.1821	75.6307	72.826	71.979	72.4975	-0.108671	0.355441	0.670161		0.00345219	0.0129806	0.985038		0.0760588	0.332562	0.599125		0.00565108	0.0194871	0.991536
sp|Q01433|AMPD2_HUMAN	AMPD2	AMP deaminase 2 OS=Homo sapiens OX=9606 GN=AMPD2 PE=1 SV=2	3166	6	272.796	278.458	305.268	303.527	309.228	286.692	295.826	290.563	284.779	302.542	266.244	285.101	283.187	259.16	294.515	273.859	-0.0589701	0.506952	0.544715		-0.0724233	0.463658	0.559533		0.036678	0.287423	0.646859		0.0143138	0.106205	0.948053
sp|Q86W34|AMZ2_HUMAN	AMZ2	Archaemetzincin-2 OS=Homo sapiens OX=9606 GN=AMZ2 PE=1 SV=2	7013	3	168.884	162.669	170.913	169.501	154.371	138.468	148.985	162.408	170.749	165.4	174.108	166.697	159.816	147.917	167.788	146.186	-0.0102578	0.0910653	0.913725		-0.128388	0.756823	0.371953		-0.191092	1.38014	0.0811078		-0.0156457	0.233002	0.875439
sp|Q9H1A4|APC1_HUMAN	ANAPC1	Anaphase-promoting complex subunit 1 OS=Homo sapiens OX=9606 GN=ANAPC1 PE=1 SV=1	4233	12	806.699	858.153	826.396	845.07	827.84	776.597	778.727	839.6	807.933	770.694	779.691	808.152	837.155	860.995	857.602	867.949	-0.0454511	0.560591	0.503106		0.0481821	1.06567	0.245045		-0.0705804	0.892812	0.199238		-0.0497604	0.516884	0.696172
sp|Q9UM13|APC10_HUMAN	ANAPC10	Anaphase-promoting complex subunit 10 OS=Homo sapiens OX=9606 GN=ANAPC10 PE=1 SV=1	4111	1	17.0141	17.403	26.3327	23.5739	20.4966	17.805	22.698	19.1533	26.0747	19.6325	20.2837	26.703	19.4713	22.116	28.4957	24.1192	0.0828624	0.146697	0.860118		0.258644	0.629476	0.444399		-0.0332841	0.0622641	0.924964		0.047801	0.0802954	0.960064
sp|Q9NYG5|APC11_HUMAN	ANAPC11	Anaphase-promoting complex subunit 11 OS=Homo sapiens OX=9606 GN=ANAPC11 PE=1 SV=1	7584	1	48.8734	48.4389	41.8231	41.367	46.5126	37.6562	55.6212	46.5867	43.9436	44.2052	43.5465	50.3098	51.5556	43.1965	46.527	46.8285	0.103676	0.450717	0.591748		0.0159575	0.0749749	0.921419		0.032549	0.062496	0.924926		-0.00290322	0.0135641	0.993354
sp|Q9UJX6|ANC2_HUMAN	ANAPC2	Anaphase-promoting complex subunit 2 OS=Homo sapiens OX=9606 GN=ANAPC2 PE=1 SV=1	4762	5	133.939	125.262	143.213	124.901	128.563	127.573	135.997	145.686	132.116	120.748	130.829	122.169	131.6	131.102	151.932	143.957	-0.0387947	0.272305	0.742441		0.110216	0.640595	0.437778		-0.010577	0.0676493	0.918189		0.00918743	0.0336848	0.984843
sp|Q9UJX5-3|APC4_HUMAN	ANAPC4	Isoform 3 of Anaphase-promoting complex subunit 4 OS=Homo sapiens OX=9606 GN=ANAPC4	2697	7	514.043	499.93	489.619	491.087	537.963	480.059	472.297	464.875	515.615	518.074	478.675	544.232	482.942	501.605	489.88	514.468	0.00722608	0.0379024	0.960774		0.00954054	0.13581	0.85522		-0.00767561	0.0407844	0.952057		0.000951751	0.00560673	0.99657
sp|Q9UJX4|APC5_HUMAN	ANAPC5	Anaphase-promoting complex subunit 5 OS=Homo sapiens OX=9606 GN=ANAPC5 PE=1 SV=2	2535	4	188.029	203.924	209.456	199.309	199.061	179.498	193.658	210.315	205.463	200.795	213.113	192.011	186.285	196.573	208.8	183.302	-0.0233872	0.124849	0.881131		-0.0296904	0.174839	0.810493		-0.0699304	0.557872	0.381242		0.038891	0.442515	0.739088
sp|Q9UJX3|APC7_HUMAN	ANAPC7	Anaphase-promoting complex subunit 7 OS=Homo sapiens OX=9606 GN=ANAPC7 PE=1 SV=4	4855	6	2191.54	2205.11	2161.27	2199.98	1848.26	1817.14	1819.66	2191.53	2202.23	2255.97	2117.64	2101.18	1987.3	2208.33	2130.28	2131.29	-0.0823858	1.01182	0.271734		-0.0219661	0.481071	0.545388		-0.260039	5.15071	0	+	0.0176758	0.510463	0.700916
sp|Q9BY76|ANGL4_HUMAN	ANGPTL4	Angiopoietin-related protein 4 OS=Homo sapiens OX=9606 GN=ANGPTL4 PE=1 SV=2	1669	1	10.8993	8.12305	8.85785	2.37731	97.1478	117.142	99.4153	1.39709	5.68049	7.70617	7.34148	6.28743	2.94696	10.8767	11.1497	8.60989	-0.353528	0.217745	0.79697		0.626581	0.523539	0.512791		3.98709	2.46456	0.0131734	+	-0.737967	0.331921	0.8154
sp|P16157-14|ANK1_HUMAN	ANK1	Isoform Er13 of Ankyrin-1 OS=Homo sapiens OX=9606 GN=ANK1	3313	7	471.352	516.808	484.206	496.207	433.725	415.168	414.512	509.356	492.434	494.809	487.074	493.419	491.091	467.108	489.379	499.082	-0.00393419	0.0461565	0.954936		-0.020254	0.197368	0.789649		-0.224286	2.83169	0.0075299	+	0.0202431	0.252822	0.863714
tr|A0A5F9ZH30|A0A5F9ZH30_HUMAN	ANK2	Ankyrin-2 OS=Homo sapiens OX=9606 GN=ANK2 PE=4 SV=1	3313	1	14.0655	12.4832	11.042	12.8965	13.6454	13.0122	13.566	7.41678	16.7529	8.13094	11.1793	14.2451	18.3568	8.89142	14.3853	8.84228	0.185338	0.327428	0.695631		-0.271342	0.437867	0.580739		0.0922259	0.527018	0.404828		-0.325609	0.323389	0.821185
sp|Q9P2R3-4|ANFY1_HUMAN	ANKFY1	Isoform 4 of Rabankyrin-5 OS=Homo sapiens OX=9606 GN=ANKFY1	998	7	291.195	270.698	297.973	285.926	277.833	288.762	297.446	291.812	299.628	291.142	334.943	315.566	298.029	292.656	296.8	303.769	0.14173	1.10943	0.242069		0.0565172	0.797068	0.350775		0.00820221	0.0707643	0.915667		0.0392715	0.53668	0.683074
sp|Q9HCJ1|ANKH_HUMAN	ANKH	Progressive ankylosis protein homolog OS=Homo sapiens OX=9606 GN=ANKH PE=1 SV=2	3611	1	54.0843	59.0027	59.0768	60.609	50.3892	49.8716	47.9339	48.3088	47.3983	55.7136	68.5762	67.0624	50.0652	54.4168	60.8876	61.557	0.0761448	0.181488	0.827267		0.0178458	0.0939855	0.89979		-0.235402	2.5083	0.0126585	+	-0.207812	1.06489	0.429473
tr|E9PDP5|E9PDP5_HUMAN	ANKHD1	Ankyrin repeat and KH domain-containing protein 1 (Fragment) OS=Homo sapiens OX=9606 GN=ANKHD1 PE=1 SV=1	1266	1	76.1643	62.2314	72.9177	66.0972	60.1166	61.3987	64.7941	66.696	68.0475	64.9609	68.4716	53.2112	61.0309	59.5876	64.529	58.7746	-0.190479	0.67923	0.42353		-0.182686	1.15448	0.218136		-0.155459	1.00598	0.162169		-0.0548327	0.321154	0.821474
sp|Q8IWZ3-6|ANKH1_HUMAN	ANKHD1	Isoform 6 of Ankyrin repeat and KH domain-containing protein 1 OS=Homo sapiens OX=9606 GN=ANKHD1	1266	16	1055.84	1053.33	1044.21	1059.02	1000.27	966.635	961.395	1077.85	1026.3	1024.73	1064.13	1070.34	966.828	973.753	975.451	1004.12	-0.0282644	0.212396	0.80277		-0.097389	1.83386	0.104341		-0.109745	1.68687	0.0482302	+	-0.0143384	0.213129	0.888904
sp|Q9P2G1|AKIB1_HUMAN	ANKIB1	Ankyrin repeat and IBR domain-containing protein 1 OS=Homo sapiens OX=9606 GN=ANKIB1 PE=1 SV=3	1550	1	19.2372	22.9689	23.0464	21.5133	15.5864	22.0458	23.5463	24.2613	20.0566	26.4687	25.324	22.9859	30.4457	22.2034	29.5431	21.8694	0.26916	0.86655	0.326869		0.167501	0.441276	0.578168		-0.107907	0.203701	0.748191		0.115669	0.34954	0.803427
sp|Q86XL3|ANKL2_HUMAN	ANKLE2	Ankyrin repeat and LEM domain-containing protein 2 OS=Homo sapiens OX=9606 GN=ANKLE2 PE=1 SV=4	1381	10	675.476	647.371	661.87	663.893	594.772	618.158	673.255	682.237	680.677	697.082	623.111	652.026	683.419	650.731	673.513	687.161	-0.0212693	0.191546	0.820407		0.0178061	0.265692	0.725725		-0.0765105	0.549394	0.38693		0.0525249	1.59272	0.239602
sp|Q8IV38|ANKY2_HUMAN	ANKMY2	Ankyrin repeat and MYND domain-containing protein 2 OS=Homo sapiens OX=9606 GN=ANKMY2 PE=1 SV=1	3100	8	742.364	713.908	721.829	774.686	784.735	715.888	702.303	718.527	703.797	734.549	730.027	712.237	719.699	763.418	757.847	751.733	-0.0340498	0.528059	0.527546		0.03825	0.6141	0.452596		-0.00860575	0.0519842	0.937654		-0.0375965	0.536076	0.683301
sp|Q9NXR5|ANR10_HUMAN	ANKRD10	Ankyrin repeat domain-containing protein 10 OS=Homo sapiens OX=9606 GN=ANKRD10 PE=1 SV=2	3922	1	65.6656	56.6217	69.4483	67.8792	58.2777	56.8822	69.8078	85.5366	95.0764	89.5103	66.0101	60.8843	76.1711	58.9176	68.618	67.9766	0.0588165	0.195007	0.816624		0.0069242	0.0240212	0.97311		-0.0757473	0.263569	0.67735		0.475377	2.6716	0.0533425
sp|Q6UB99|ANR11_HUMAN	ANKRD11	Ankyrin repeat domain-containing protein 11 OS=Homo sapiens OX=9606 GN=ANKRD11 PE=1 SV=3	884	6	155.557	151.546	154.758	170.894	137.745	152.088	151.422	164.76	156.715	156.718	159.273	153.741	131.39	146.319	141.851	158.246	-0.0981256	0.424811	0.611351		-0.0881912	0.666818	0.423935		-0.104918	0.816802	0.229139		0.0121481	0.0966348	0.954482
sp|Q8IZ07|AN13A_HUMAN	ANKRD13A	Ankyrin repeat domain-containing protein 13A OS=Homo sapiens OX=9606 GN=ANKRD13A PE=1 SV=3	5857	1	15.6424	15.0225	13.8888	9.15478	15.8248	11.8463	15.6964	9.51281	12.2937	11.7496	11.5646	16.4882	20.8203	12.8618	16.4914	17.1626	0.26827	0.368223	0.662701		0.226582	0.454359	0.56775		0.124243	0.218991	0.729201		-0.241952	0.514293	0.697722
sp|Q6ZTN6-3|AN13D_HUMAN	ANKRD13D	Isoform 3 of Ankyrin repeat domain-containing protein 13D OS=Homo sapiens OX=9606 GN=ANKRD13D	6812	1	254.873	238.556	262.053	264.547	228.809	258.86	258.08	250.248	257.158	256.224	270.7	277.047	241.034	248.607	260.458	269.725	0.0426485	0.231534	0.780818		0.0260967	0.214428	0.774832		-0.0379943	0.214596	0.734734		-0.00156588	0.0144001	0.99329
sp|Q6P6B7|ANR16_HUMAN	ANKRD16	Ankyrin repeat domain-containing protein 16 OS=Homo sapiens OX=9606 GN=ANKRD16 PE=1 SV=1	4890	1	19.2327	21.656	19.6085	23.4527	23.5568	24.3225	25.6215	14.1037	18.5925	22.0049	22.7557	17.2994	19.2221	19.1369	18.2615	18.6239	-0.0916517	0.270828	0.743786		-0.164118	1.06377	0.246566		0.22704	1.45836	0.0698025		-0.222017	0.444978	0.738107
sp|O75179|ANR17_HUMAN	ANKRD17	Ankyrin repeat domain-containing protein 17 OS=Homo sapiens OX=9606 GN=ANKRD17 PE=1 SV=3	1266	6	665.483	695.111	664.707	694.557	634.081	610.703	626.766	670.853	708.537	697.135	708.434	751.817	688.799	702.764	695.095	693.806	0.0745851	0.76694	0.375273		0.03648	0.862235	0.318715		-0.124093	2.42219	0.0145734	+	0.0256451	0.362389	0.793534
tr|A0A494C151|A0A494C151_HUMAN	ANKRD20A1	Ankyrin repeat domain-containing protein 20A1 (Fragment) OS=Homo sapiens OX=9606 GN=ANKRD20A1 PE=4 SV=1	880	3	60.5175	56.3659	54.9338	58.696	39.8218	44.7629	49.1673	46.0995	59.1883	57.0779	54.1662	55.5663	53.9521	47.0281	55.2923	58.7613	-0.0780221	1.09044	0.249137		-0.107294	0.418508	0.595224		-0.374596	1.4127	0.076346		-0.0981177	0.320112	0.822378
sp|Q5VYY1|ANR22_HUMAN	ANKRD22	Ankyrin repeat domain-containing protein 22 OS=Homo sapiens OX=9606 GN=ANKRD22 PE=2 SV=1	7714	1	54.9935	56.3885	55.5526	62.9705	62.8054	65.7381	50.9509	67.8952	62.901	65.5605	63.7324	66.2521	64.0153	51.0761	56.2873	65.2821	0.172005	1.59291	0.123935		-0.00341642	0.00974562	0.988508		0.0514438	0.151883	0.812872		0.188942	1.70928	0.20396
sp|Q96NW4|ANR27_HUMAN	ANKRD27	Ankyrin repeat domain-containing protein 27 OS=Homo sapiens OX=9606 GN=ANKRD27 PE=1 SV=2	4682	6	283.823	259.721	295.22	296.461	304.627	314.147	298.105	276.133	290.496	307.594	300.822	294.961	285.415	289.277	314.446	310.33	0.0512684	0.449309	0.592907		0.103459	0.871839	0.315291		0.108538	1.05128	0.147837		0.0387396	0.246061	0.867052
sp|O15084|ANR28_HUMAN	ANKRD28	Serine/threonine-protein phosphatase 6 regulatory ankyrin repeat subunit A OS=Homo sapiens OX=9606 GN=ANKRD28 PE=1 SV=5	3712	4	126.801	124.28	127.071	142.114	133.462	109.52	124.761	133.953	116.414	133.716	148.158	151.935	118.799	144.685	137.498	141.545	0.0958269	0.306347	0.713434		0.120651	1.18513	0.211002		-0.0882808	0.379559	0.551941		-0.0238231	0.106529	0.947727
sp|Q6AI12|ANR40_HUMAN	ANKRD40	Ankyrin repeat domain-containing protein 40 OS=Homo sapiens OX=9606 GN=ANKRD40 PE=1 SV=2	7196	1	173.657	169.403	172.985	145.771	148.302	139.171	145.193	142.514	151.39	153.026	150.172	137.973	163.043	160.399	159.815	161.408	-0.137345	0.693495	0.414837		-0.039836	0.254989	0.73563		-0.194973	1.39001	0.0795882		-0.148379	1.0516	0.435767
tr|A0A2R8Y7Y4|A0A2R8Y7Y4_HUMAN	ANKRD44	Serine/threonine-protein phosphatase 6 regulatory ankyrin repeat subunit B OS=Homo sapiens OX=9606 GN=ANKRD44 PE=1 SV=1	3712	2	47.7985	50.7734	52.8603	59.143	50.9274	57.2513	63.1436	51.6829	44.8493	58.1878	61.9468	72.4882	64.3366	56.6809	48.5486	51.6547	0.332948	1.73277	0.106214		-0.00812689	0.0301412	0.967507		0.116271	0.451548	0.476789		-0.0333612	0.0930713	0.95611
sp|Q9ULJ7|ANR50_HUMAN	ANKRD50	Ankyrin repeat domain-containing protein 50 OS=Homo sapiens OX=9606 GN=ANKRD50 PE=1 SV=4	2948	5	640.213	588.586	635.072	631.787	558.603	542.727	555.415	582.406	574.732	577.734	634.167	612.832	551.255	575.559	621.304	574.612	-0.0595161	0.353779	0.671223		-0.0795904	0.791159	0.35308		-0.175336	2.36099	0.0161849	+	-0.108768	1.55362	0.255184
sp|Q8NB46|ANR52_HUMAN	ANKRD52	Serine/threonine-protein phosphatase 6 regulatory ankyrin repeat subunit C OS=Homo sapiens OX=9606 GN=ANKRD52 PE=1 SV=3	3711	4	182.952	185.602	169.149	203.676	154.409	126.861	122.626	195.786	188.054	196.037	195.217	175.806	168.076	179.603	180.559	185.307	-0.0443364	0.2046	0.809798		-0.0246623	0.161248	0.825527		-0.465639	1.57512	0.0578999		0.0634549	0.465688	0.725832
sp|Q6NXT1|ANR54_HUMAN	ANKRD54	Ankyrin repeat domain-containing protein 54 OS=Homo sapiens OX=9606 GN=ANKRD54 PE=1 SV=2	5037	5	197.087	178.345	194.651	185.968	181.899	167.247	177.115	191.381	198.607	194.706	186.597	156.112	163.928	192.042	184.99	170.789	-0.165505	0.82248	0.345314		-0.0503338	0.345496	0.657938		-0.107427	1.08342	0.140252		0.0451919	0.553761	0.674797
sp|Q3KP44|ANR55_HUMAN	ANKRD55	Ankyrin repeat domain-containing protein 55 OS=Homo sapiens OX=9606 GN=ANKRD55 PE=1 SV=3	7698	1	156.825	155.286	166.755	168.342	163.659	159.563	143.167	172.974	167.572	162.943	155.325	153.288	140.414	162.579	161.675	157.952	-0.112895	0.941189	0.295587		-0.00872762	0.0961232	0.897633		-0.0591294	0.358727	0.573199		0.0532657	0.640052	0.628035
sp|Q92625|ANS1A_HUMAN	ANKS1A	Ankyrin repeat and SAM domain-containing protein 1A OS=Homo sapiens OX=9606 GN=ANKS1A PE=1 SV=4	3174	13	1211.36	1251.6	1280.72	1264.34	1181.97	1107.71	1118.88	1247.49	1205.55	1254.99	1288.96	1346	1212.87	1301.3	1341.62	1294.54	0.0338351	0.276548	0.737968		0.0681878	1.46133	0.155043		-0.140326	1.69387	0.0475178	+	-0.01847	0.306314	0.832664
sp|Q6ZW76|ANKS3_HUMAN	ANKS3	Ankyrin repeat and SAM domain-containing protein 3 OS=Homo sapiens OX=9606 GN=ANKS3 PE=1 SV=1	735	2	120.612	123.671	124.53	127.553	124.827	128.142	122.33	122.419	119.77	128.865	148.729	160.058	118.631	134.648	132.014	127.766	0.188136	0.546682	0.514185		0.0833448	1.41192	0.162089		0.0116996	0.17502	0.78476		-0.00513289	0.0488304	0.97744
sp|Q8N8V4|ANS4B_HUMAN	ANKS4B	Ankyrin repeat and SAM domain-containing protein 4B OS=Homo sapiens OX=9606 GN=ANKS4B PE=1 SV=2	567	4	166.578	156.81	175.997	194.132	137.378	129.371	125.639	202.416	167.305	164.249	212.774	203.043	201.946	182.044	215.535	207.623	0.252241	1.60475	0.122362		0.219274	1.08255	0.239348		-0.403135	2.39429	0.0151771	+	0.0357784	0.110693	0.947603
sp|Q68DC2-4|ANKS6_HUMAN	ANKS6	Isoform 3 of Ankyrin repeat and SAM domain-containing protein 6 OS=Homo sapiens OX=9606 GN=ANKS6	6743	1	17.3333	16.8341	19.5187	13.8008	14.8519	14.5394	15.2499	17.8693	25.2935	21.4529	22.0478	18.6018	16.0015	21.2086	23.07	18.1906	0.161126	0.405514	0.628027		0.307651	1.05601	0.248956		-0.170497	0.701329	0.285197		0.348839	0.907806	0.49332
sp|Q9H8Y5|ANKZ1_HUMAN	ANKZF1	Ankyrin repeat and zinc finger domain-containing protein 1 OS=Homo sapiens OX=9606 GN=ANKZF1 PE=1 SV=1	3077	5	552.965	551.399	566.002	580.984	906.117	889.25	911.272	542.16	498.772	543.811	595.959	564.573	533.112	528.804	561.74	559.985	0.00320632	0.0208359	0.978715		-0.0330563	0.414575	0.599375		0.680992	6.00024	0	+	-0.0923294	0.860287	0.51622
sp|Q9NQW6|ANLN_HUMAN	ANLN	Anillin OS=Homo sapiens OX=9606 GN=ANLN PE=1 SV=2	850	15	1548.08	1456.59	1449.12	1421.72	2076.89	1931.12	1959.83	1463.68	1365.26	1433.27	1635.15	1573	1661.91	1750.21	1761.46	1644.93	0.144622	2.01184	0.0806759		0.226803	2.39206	0.0541		0.437558	3.51856	0.00219913	+	-0.0479436	0.540091	0.682697
sp|Q5XXA6-2|ANO1_HUMAN	ANO1	Isoform 2 of Anoctamin-1 OS=Homo sapiens OX=9606 GN=ANO1	726	1	10.6943	8.40686	7.30066	6.69731	7.53426	10.2869	10.4508	7.60237	8.61587	10.7682	5.27134	6.47691	8.19545	7.53417	6.81438	7.61516	-0.316054	0.60644	0.47044		-0.155185	0.419239	0.594971		0.195095	0.393443	0.53788		0.128564	0.248032	0.866199
sp|Q5XXA6|ANO1_HUMAN	ANO1	Anoctamin-1 OS=Homo sapiens OX=9606 GN=ANO1 PE=1 SV=1	726	8	1292.84	1409.51	1295.42	1330.53	1557.06	1640.65	1625.2	1496.15	1650.79	1641.39	1398.53	1517	1603.28	1427.49	1351.6	1408.98	0.17593	1.15151	0.226249		0.0681437	0.889018	0.309276		0.27178	3.12367	0.00553488	+	0.26032	1.92861	0.152665
sp|Q9NW15|ANO10_HUMAN	ANO10	Anoctamin-10 OS=Homo sapiens OX=9606 GN=ANO10 PE=1 SV=2	7565	1	31.9493	30.0321	36.3885	32.9349	29.7284	34.7956	35.9123	33.6077	40.7717	36.272	36.9948	44.514	40.5206	38.5911	42.0535	33.6735	0.308732	1.48985	0.13966		0.212689	0.869101	0.315746		0.0270609	0.0941729	0.889648		0.167058	0.767453	0.557391
sp|Q4KMQ2-2|ANO6_HUMAN	ANO6	Isoform 2 of Anoctamin-6 OS=Homo sapiens OX=9606 GN=ANO6	4212	9	2147.2	2192.32	2076.78	2145.5	2246.13	2498.33	2418.09	2240.19	2333.38	2412.46	2272.52	2601.02	2511	2320.54	2245.35	2406.07	0.199567	1.177	0.216905		0.118382	1.4847	0.150447		0.156447	1.21354	0.109717		0.121205	1.41535	0.298997
sp|Q9HCE9|ANO8_HUMAN	ANO8	Anoctamin-8 OS=Homo sapiens OX=9606 GN=ANO8 PE=1 SV=3	3948	2	16.9435	20.5992	17.9901	20.0367	23.315	16.1278	16.9852	21.631	20.8659	15.3701	19.2113	23.9189	23.9148	20.6182	24.7628	22.6607	0.239378	0.865796	0.326864		0.264136	1.27624	0.190591		-0.0215967	0.0397792	0.953543		0.0181659	0.0351845	0.983726
sp|P39687|AN32A_HUMAN	ANP32A	Acidic leucine-rich nuclear phosphoprotein 32 family member A OS=Homo sapiens OX=9606 GN=ANP32A PE=1 SV=1	4012	4	823.548	759.099	821.559	837.888	830.949	786.358	744.234	743.489	759.006	772.06	718.989	701.603	764.286	745.129	715.947	751.847	-0.154237	1.53811	0.13334		-0.135222	1.74782	0.112649		-0.0425814	0.309481	0.624061		-0.0954371	1.29138	0.334029
sp|Q92688|AN32B_HUMAN	ANP32B	Acidic leucine-rich nuclear phosphoprotein 32 family member B OS=Homo sapiens OX=9606 GN=ANP32B PE=1 SV=1	4012	7	2870.9	2717.77	2859.12	2887.23	2920.03	2912.04	2777.49	2812.07	2641.71	2609.67	2700.45	2726.02	2597.58	2692.54	2726.68	2767.78	-0.0832412	1.40696	0.1566		-0.0540151	1.13878	0.221049		0.0183025	0.234529	0.712337		-0.0766386	0.877171	0.508159
sp|P15144|AMPN_HUMAN	ANPEP	Aminopeptidase N OS=Homo sapiens OX=9606 GN=ANPEP PE=1 SV=4	335	14	932.132	726.169	1137.69	1034.76	849.839	1139.46	947.759	1166.05	914.056	935.107	872.893	666.204	749.071	682.758	596.261	654.553	-0.317735	0.86371	0.327983		-0.554082	1.65849	0.125021		0.0406378	0.0777881	0.907963		0.080299	0.172385	0.91001
sp|Q9BQD7|ANKMT_HUMAN	ANTKMT	Adenine nucleotide translocase lysine N-methyltransferase OS=Homo sapiens OX=9606 GN=ANTKMT PE=1 SV=1	1614	2	103.845	107.5	112.443	109.018	69.6411	96.9481	111.369	81.3824	111.762	112.999	100.483	128.512	114.661	100.258	87.1302	104.527	0.0756109	0.266983	0.747772		-0.156853	0.74657	0.377048		-0.250251	0.470153	0.458341		-0.099956	0.231306	0.876653
sp|P58335|ANTR2_HUMAN	ANTXR2	Anthrax toxin receptor 2 OS=Homo sapiens OX=9606 GN=ANTXR2 PE=1 SV=5	5477	3	310.652	343.363	314.603	295.375	331.294	351.541	360.193	366.999	393.85	393.481	317.338	341.506	363.464	320.612	346.867	324.835	0.108803	0.691091	0.415313		0.0671942	0.532865	0.506887		0.13908	1.21683	0.109053		0.28546	2.40181	0.0814634
sp|P04083|ANXA1_HUMAN	ANXA1	Annexin A1 OS=Homo sapiens OX=9606 GN=ANXA1 PE=1 SV=2	644	10	866.732	822.853	814.573	834.992	893.326	858.606	845.214	814.372	798.254	849.889	775.342	774.366	741.038	809.916	830.893	822.265	-0.128541	2.07704	0.07728		-0.0236606	0.463887	0.559432		0.0524931	0.800315	0.237328		-0.0244033	0.299136	0.835777
sp|Q9UJ72|ANX10_HUMAN	ANXA10	Annexin A10 OS=Homo sapiens OX=9606 GN=ANXA10 PE=1 SV=3	2357	4	594.659	643.604	578.333	544.131	712.188	602.89	644.591	618.361	650.64	536.236	541.99	450.344	554.877	562.693	449.252	452.025	-0.198035	0.795959	0.359464		-0.279764	0.991994	0.27063		0.145656	0.776271	0.247181		0.0258697	0.0937162	0.955973
sp|P50995|ANX11_HUMAN	ANXA11	Annexin A11 OS=Homo sapiens OX=9606 GN=ANXA11 PE=1 SV=1	1898	9	407.054	450.579	455.274	460.77	432.951	433.475	410.793	436.209	437.182	450.741	476.613	467.613	482.258	448.029	463.267	476.858	0.102367	1.07495	0.252905		0.0627197	0.590886	0.467411		-0.0574242	0.534838	0.398322		-0.00509479	0.0393338	0.982502
sp|P27216-2|ANX13_HUMAN	ANXA13	Isoform B of Annexin A13 OS=Homo sapiens OX=9606 GN=ANXA13	1898	4	252.627	256.624	230.706	260.72	256.037	262.122	263.472	279.158	286.727	275.164	458.991	483.584	456.407	398.701	383.836	388.299	0.899546	4.99508	0.0075	+	0.643016	3.8938	0.00787097	+	0.060108	0.640376	0.322105		0.165712	1.74234	0.191321
sp|P07355-2|ANXA2_HUMAN	ANXA2	Isoform 2 of Annexin A2 OS=Homo sapiens OX=9606 GN=ANXA2	1074	24	908.25	934.474	856.13	852.473	924.315	936.919	901.939	820.732	853.224	871.401	1107.15	1206.31	998.456	1122.05	961.419	948.569	0.311153	1.37046	0.165068		0.183812	0.896578	0.306701		0.0539309	0.68336	0.296717		-0.0647911	0.751874	0.564823
sp|P12429|ANXA3_HUMAN	ANXA3	Annexin A3 OS=Homo sapiens OX=9606 GN=ANXA3 PE=1 SV=3	4704	7	1068.29	1004.58	1050.7	1025.88	1147.76	1176.55	1088.75	1029.77	962.678	990.532	1073.63	960.323	991.503	1056.53	1091.36	1073.74	-0.0419346	0.316127	0.704595		0.0501747	1.051	0.251036		0.132825	1.47084	0.0686304		-0.0612862	0.818481	0.533785
sp|P09525|ANXA4_HUMAN	ANXA4	Annexin A4 OS=Homo sapiens OX=9606 GN=ANXA4 PE=1 SV=4	542	13	1907.1	1872.17	1970.84	1855.85	1865.92	1860.96	1826.31	1980.17	1882.46	1831.22	2349.9	2111.86	2225.89	1918.97	2066.41	2040.6	0.22842	1.65971	0.115588		0.0787384	0.913254	0.298604		-0.038457	0.843973	0.218975		-0.0030628	0.0265542	0.986649
sp|P09525-2|ANXA4_HUMAN	ANXA4	Isoform 2 of Annexin A4 OS=Homo sapiens OX=9606 GN=ANXA4	542	1	7.68349	8.52574	5.63998	4.96709	4.75632	4.97014	6.87855	6.09068	6.96203	5.89988	8.25827	9.60328	6.94478	6.26531	9.62785	10.4139	0.324679	0.66984	0.429338		0.387927	0.599296	0.462317		-0.262007	0.467577	0.460878		-0.0548205	0.0994037	0.95204
sp|P08758|ANXA5_HUMAN	ANXA5	Annexin A5 OS=Homo sapiens OX=9606 GN=ANXA5 PE=1 SV=2	542	17	2240.53	2321.73	2124.62	2126.06	2395.05	2246.2	2293.29	2222.4	2083.37	2135.43	2318.84	2337.89	2234.98	2315.38	2160.8	2237.31	0.0610172	0.786647	0.364759		0.0229197	0.212713	0.777171		0.0697135	0.813445	0.231321		-0.0367521	0.381791	0.78117
sp|P08133|ANXA6_HUMAN	ANXA6	Annexin A6 OS=Homo sapiens OX=9606 GN=ANXA6 PE=1 SV=3	2057	15	1368.04	1380.24	1360.15	1358.51	1405.59	1392.27	1314.02	1360.75	1384.45	1349.26	1282.23	1219.07	1328.82	1329.35	1374.36	1393.2	-0.0991779	0.967184	0.288185		-0.00141074	0.0216541	0.974985		0.00349549	0.0364378	0.957551		-0.00207741	0.0579737	0.972494
sp|P20073|ANXA7_HUMAN	ANXA7	Annexin A7 OS=Homo sapiens OX=9606 GN=ANXA7 PE=1 SV=3	2656	6	269.532	221.929	256.849	309.182	253.486	259.089	253.57	290.074	242.453	321.468	241.391	225.486	236.448	247.498	238.241	262.098	-0.163839	0.706824	0.405562		-0.0758346	0.28686	0.70796		-0.0399036	0.146302	0.819999		0.107118	0.281023	0.84607
tr|A0A087WTN9|A0A087WTN9_HUMAN	ANXA8	Annexin OS=Homo sapiens OX=9606 GN=ANXA8 PE=1 SV=1	5666	4	196.165	193.355	205.34	223.852	193.316	183.626	175.263	192.206	203.723	192.377	211.117	201.872	169.533	204.217	175.448	188.143	-0.0799533	0.290793	0.725641		-0.113311	0.647636	0.434767		-0.151886	1.22098	0.108122		-0.0599037	0.480487	0.718539
sp|P19801-2|AOC1_HUMAN	AOC1	Isoform 2 of Amiloride-sensitive amine oxidase [copper-containing] OS=Homo sapiens OX=9606 GN=AOC1	1835	4	392.079	374.565	419.392	408.953	345.292	384.076	359.81	372.084	377.482	382.76	463.477	457.371	483.682	431.13	453.829	448.96	0.232492	2.4838	0.0467934	+	0.158137	1.82853	0.104863		-0.135334	1.13129	0.127398		-0.07799	0.94135	0.47963
sp|Q10567|AP1B1_HUMAN	AP1B1	AP-1 complex subunit beta-1 OS=Homo sapiens OX=9606 GN=AP1B1 PE=1 SV=2	423	8	666.344	644.7	621.373	595.422	591.144	637.933	675.451	645.724	681.905	640.722	664.605	536.285	682.341	679.895	611.409	573.595	-0.0165701	0.0471971	0.954113		-0.0260728	0.116282	0.876484		0.0056884	0.0288366	0.965224		0.0548288	0.557768	0.67207
sp|O43747-2|AP1G1_HUMAN	AP1G1	Isoform 2 of AP-1 complex subunit gamma-1 OS=Homo sapiens OX=9606 GN=AP1G1	796	8	770.662	805.931	753.739	746.484	879.079	792.241	798.03	802.704	761.13	754.103	787.472	738.773	796.995	813.653	799.359	789.572	0.00957742	0.0805342	0.923748		0.05871	1.01979	0.260372		0.0967256	0.765373	0.251546		0.00652481	0.0610572	0.969363
sp|O75843|AP1G2_HUMAN	AP1G2	AP-1 complex subunit gamma-like 2 OS=Homo sapiens OX=9606 GN=AP1G2 PE=1 SV=1	796	5	270.371	288.145	309.791	309.89	287.445	263.577	290.463	325.501	280.211	273.224	307.258	307.525	315.886	325.757	302.175	287.949	0.0769894	0.691593	0.414994		0.0521345	0.306531	0.691711		-0.0695752	0.47656	0.45177		-0.00977679	0.0356053	0.984151
sp|Q9BXS5-2|AP1M1_HUMAN	AP1M1	Isoform 2 of AP-1 complex subunit mu-1 OS=Homo sapiens OX=9606 GN=AP1M1	1876	8	1697.81	1601.16	1654.46	1536.51	1741.85	1699.32	1745	1565.14	1687.47	1601.2	1691.57	1580.5	1742.29	1613.95	1776.87	1582.07	0.042707	0.340013	0.684579		0.0300466	0.187806	0.797836		0.0923992	1.27895	0.0963692		-0.00376681	0.0285701	0.985819
sp|P61966|AP1S1_HUMAN	AP1S1	AP-1 complex subunit sigma-1A OS=Homo sapiens OX=9606 GN=AP1S1 PE=1 SV=1	1992	1	91.0785	99.8024	111.669	110.744	83.0954	87.5017	86.6846	99.5628	102.371	107.379	108.527	111.743	99.1074	97.8148	92.2748	90.17	0.0462379	0.209191	0.805292		-0.141246	0.857236	0.32062		-0.264173	1.57245	0.0580522		0.00120269	0.00515887	0.996624
sp|P56377|AP1S2_HUMAN	AP1S2	AP-1 complex subunit sigma-2 OS=Homo sapiens OX=9606 GN=AP1S2 PE=1 SV=1	1991	2	24.7999	17.9412	20.4602	21.9424	17.8393	22.5443	25.7949	17.625	22.6429	25.4425	28.2803	18.9154	19.8657	14.8583	26.2109	32.1298	0.0565081	0.0958032	0.908954		0.135078	0.136947	0.854275		0.0449311	0.0860969	0.898023		0.0346027	0.0648232	0.965986
sp|Q96PC3-4|AP1S3_HUMAN	AP1S3	Isoform 4 of AP-1 complex subunit sigma-3 OS=Homo sapiens OX=9606 GN=AP1S3	1974	3	54.4746	55.0405	52.4448	55.1684	56.1265	45.0938	49.7469	49.1068	58.0819	49.2811	48.1267	54.7975	50.9694	50.4233	53.6824	56.6143	-0.0833202	0.585105	0.485929		-0.0202777	0.140708	0.850853		-0.114774	0.474956	0.453637		-0.0618311	0.28214	0.845496
sp|O95782|AP2A1_HUMAN	AP2A1	AP-2 complex subunit alpha-1 OS=Homo sapiens OX=9606 GN=AP2A1 PE=1 SV=3	133	11	617.448	548.799	595.917	581.39	589.186	608.716	620.485	611.072	595.555	570.882	603.886	572.909	621.227	599.596	628.718	622.565	0.0332643	0.274004	0.740321		0.0755728	0.877207	0.312956		0.049993	0.538151	0.395545		0.0169533	0.138806	0.931619
sp|O94973|AP2A2_HUMAN	AP2A2	AP-2 complex subunit alpha-2 OS=Homo sapiens OX=9606 GN=AP2A2 PE=1 SV=2	133	6	2002.12	2017.71	2023.84	2081.38	2168.82	2157.24	2087.07	2126.7	2017.34	2042.73	2164.72	2263.36	2081.44	2187.9	2277.5	2247.06	0.0945221	0.998027	0.275009		0.139458	2.54002	0.0475113	+	0.0736379	1.56594	0.0586382		0.0216357	0.332968	0.8145
sp|P63010-2|AP2B1_HUMAN	AP2B1	Isoform 2 of AP-2 complex subunit beta OS=Homo sapiens OX=9606 GN=AP2B1	423	15	1737.93	1750.15	1709.99	1693.91	1830.68	1723.04	1825.03	1751.03	1786.35	1767.79	1843.88	1874.82	1774.5	1857.75	1853.44	1794.64	0.0875047	1.33275	0.172465		0.0910203	1.94885	0.0925298		0.0569536	0.76319	0.252802		0.0375901	1.40123	0.303406
tr|E9PFW3|E9PFW3_HUMAN	AP2M1	AP-2 complex subunit mu OS=Homo sapiens OX=9606 GN=AP2M1 PE=1 SV=1	3112	10	481.051	448.595	489.049	549.738	482.005	456.45	488.414	531.79	478.68	527.572	505.639	501.27	483.292	466.365	476.845	502.922	0.0171153	0.0948132	0.909769		-0.0266435	0.144491	0.846659		-0.0458784	0.272693	0.665221		0.0613471	0.330424	0.81603
tr|M0QYZ2|M0QYZ2_HUMAN	AP2S1	AP complex subunit sigma OS=Homo sapiens OX=9606 GN=AP2S1 PE=1 SV=1	6357	8	518.853	585.405	534.528	516.969	568.985	554.225	549.955	553.826	552.562	566.542	581.573	618.654	560.008	569.527	607.583	605.674	0.123237	1.02632	0.266915		0.142186	1.38967	0.166363		0.0511159	0.497674	0.430546		0.0509747	0.502254	0.707383
sp|O00203|AP3B1_HUMAN	AP3B1	AP-3 complex subunit beta-1 OS=Homo sapiens OX=9606 GN=AP3B1 PE=1 SV=3	4441	19	1169.1	1214.83	1192.93	1154.37	1290.83	1165.7	1187.39	1247.42	1192.16	1156.28	1130.7	1131.46	1209.05	1268.27	1248.58	1204.75	-0.0321834	0.36062	0.667384		0.068686	1.18261	0.210966		0.0371545	0.296226	0.638144		0.01873	0.196816	0.896796
sp|O14617-5|AP3D1_HUMAN	AP3D1	Isoform 5 of AP-3 complex subunit delta-1 OS=Homo sapiens OX=9606 GN=AP3D1	2213	13	1109.9	1146.16	1122.94	1121.93	1266.26	1171.68	1192.13	1134.55	1151.38	1091.56	1180.75	1223.03	1136.41	1157.61	1194.44	1168.54	0.0680901	0.835268	0.33879		0.0606048	1.65458	0.126342		0.104106	1.08639	0.139575		0.000499813	0.00639958	0.996809
sp|Q9Y2T2|AP3M1_HUMAN	AP3M1	AP-3 complex subunit mu-1 OS=Homo sapiens OX=9606 GN=AP3M1 PE=1 SV=1	5955	2	122.303	129.06	133.269	118.173	128.664	120.219	124.603	125.451	123.192	114.841	139.731	137.267	131.468	130.303	128.757	116.22	0.116347	1.24528	0.196099		-0.00730935	0.0380535	0.959065		-0.0128984	0.097437	0.885893		-0.0525457	0.415304	0.757109
sp|P53677|AP3M2_HUMAN	AP3M2	AP-3 complex subunit mu-2 OS=Homo sapiens OX=9606 GN=AP3M2 PE=2 SV=1	5955	3	427.102	464.143	467.961	494.249	424.936	438.623	446.318	470.277	474.233	474.574	490.686	547.985	442.384	498.29	475.962	511.267	0.0878845	0.35471	0.670696		0.0971089	0.894957	0.307055		-0.0840944	0.816939	0.229115		0.0317192	0.284529	0.844207
sp|Q92572|AP3S1_HUMAN	AP3S1	AP-3 complex subunit sigma-1 OS=Homo sapiens OX=9606 GN=AP3S1 PE=1 SV=1	2039	2	337.563	311.358	312.065	329.526	343.534	309.254	348.401	345.579	332.469	330.587	299.17	289.653	315.587	299.938	301.482	305.551	-0.0978829	1.00833	0.272389		-0.0929427	1.34719	0.175864		0.0476721	0.307407	0.626066		0.060096	0.820746	0.532275
sp|Q9Y6B7|AP4B1_HUMAN	AP4B1	AP-4 complex subunit beta-1 OS=Homo sapiens OX=9606 GN=AP4B1 PE=1 SV=2	1937	9	592.804	598.906	605.761	614.864	593.531	623.232	635.877	580.871	614.762	565.257	674.235	653.229	617.105	642.736	656.054	597.821	0.103227	1.0038	0.273349		0.0670263	0.626119	0.446643		0.0337217	0.425682	0.504369		-0.039841	0.41781	0.754924
sp|Q9UPM8|AP4E1_HUMAN	AP4E1	AP-4 complex subunit epsilon-1 OS=Homo sapiens OX=9606 GN=AP4E1 PE=1 SV=2	5009	3	352.895	342.646	372.325	371.688	370.676	352.176	368.061	343.046	355.909	338.398	390.255	385.294	317.336	361.888	392.331	361.926	0.0121429	0.0392169	0.959324		0.0477834	0.418745	0.595244		0.0154803	0.157286	0.805884		-0.0571093	0.745402	0.569517
tr|C9JC87|C9JC87_HUMAN	AP4M1	AP-4 complex subunit mu-1 OS=Homo sapiens OX=9606 GN=AP4M1 PE=1 SV=1	7610	2	53.7323	64.3091	63.514	56.5452	50.8264	58.2986	62.7925	60.1132	60.9259	61.185	57.5193	69.6995	61.6424	53.2319	52.766	65.4782	0.0803829	0.321515	0.701285		-0.0616848	0.195334	0.792186		-0.0561123	0.196171	0.757398		0.0333156	0.195401	0.897981
sp|Q2VPB7|AP5B1_HUMAN	AP5B1	AP-5 complex subunit beta-1 OS=Homo sapiens OX=9606 GN=AP5B1 PE=1 SV=4	213	2	259.848	259.996	262.967	241.985	242.689	244.006	230.418	280.185	261.38	254.547	283.631	273.915	250.321	261.478	261.727	260.234	0.0706851	0.488495	0.559301		0.0283647	0.421947	0.592299		-0.0997296	1.31591	0.0905063		0.050331	0.429342	0.748925
tr|E7EQ45|E7EQ45_HUMAN	AP5M1	AP-5 complex subunit mu-1 OS=Homo sapiens OX=9606 GN=AP5M1 PE=1 SV=1	3604	2	142.048	170.13	152.389	168.606	118.12	124.753	132.642	132.894	167	160.506	169.213	175.794	138.164	150.325	157.046	163.966	0.0210949	0.0578465	0.946714		-0.00771807	0.0366193	0.959952		-0.336319	2.09754	0.0247247	+	-0.0476906	0.147173	0.926944
sp|O43299|AP5Z1_HUMAN	AP5Z1	AP-5 complex subunit zeta-1 OS=Homo sapiens OX=9606 GN=AP5Z1 PE=1 SV=2	3132	3	204.944	206.871	188.988	189.012	184.16	195.321	183.311	203.894	187.235	195.829	205.997	207.01	187.357	220.005	225.622	215.247	0.0191878	0.118755	0.886642		0.158962	1.84623	0.103967		-0.07315	0.755945	0.256492		-0.0127621	0.0911838	0.955662
sp|O14727|APAF_HUMAN	APAF1	Apoptotic protease-activating factor 1 OS=Homo sapiens OX=9606 GN=APAF1 PE=1 SV=2	1402	5	125.91	140.501	144.628	142.845	167.959	153.743	158.992	145.801	142.919	154.547	172.038	162.133	143.852	149.563	160.932	159.294	0.200721	1.01027	0.271441		0.178856	1.59492	0.133529		0.211752	1.80306	0.0383919	+	0.0949719	0.804319	0.540437
sp|Q92870-4|APBB2_HUMAN	APBB2	Isoform 4 of Amyloid-beta A4 precursor protein-binding family B member 2 OS=Homo sapiens OX=9606 GN=APBB2	193	1	5.05812	7.41535	8.77972	7.24628	7.83707	6.70464	6.56052	5.72899	7.3674	8.11241	5.75085	8.78081	8.60166	6.83103	8.19663	8.73888	0.115782	0.169396	0.837924		0.173061	0.371906	0.63816		0.00462864	0.00821628	0.991481		0.0013895	0.00204525	0.997983
sp|P25054|APC_HUMAN	APC	Adenomatous polyposis coli protein OS=Homo sapiens OX=9606 GN=APC PE=1 SV=2	2546	8	174.204	166.249	169.127	183.772	186.068	178.22	168.326	166.376	179.942	167.14	184.436	161.101	167.693	175.132	186.769	183.595	-0.0202341	0.109001	0.896249		0.069538	0.796073	0.351324		0.0343789	0.261314	0.680039		-0.0181914	0.139968	0.930791
tr|C9JIF9|C9JIF9_HUMAN	APEH	Acylamino-acid-releasing enzyme OS=Homo sapiens OX=9606 GN=APEH PE=1 SV=1	1315	4	195.879	212.077	225.022	221.683	222.822	206.163	208.391	210.721	213.033	210.12	222.565	217.242	212.581	214.603	201.828	199.234	0.0272354	0.216918	0.797668		-0.0568586	0.449393	0.571476		-0.0069554	0.0420861	0.95068		-0.0140706	0.110165	0.947465
sp|P27695|APEX1_HUMAN	APEX1	DNA-(apurinic or apyrimidinic site) lyase OS=Homo sapiens OX=9606 GN=APEX1 PE=1 SV=2	5274	7	657.072	641.399	641.136	672.55	656.323	658.315	646.728	671.692	643.744	700.512	688.254	672.22	643.947	648.519	661.961	653.958	0.0327191	0.41772	0.616479		0.0041446	0.0790424	0.916376		0.00189465	0.0351663	0.959061		0.0406792	0.425972	0.751327
sp|Q9UBZ4|APEX2_HUMAN	APEX2	DNA-(apurinic or apyrimidinic site) lyase 2 OS=Homo sapiens OX=9606 GN=APEX2 PE=1 SV=1	6393	1	169.494	167.91	195.287	181.063	166.429	163.75	163.42	168.16	168.095	171.833	159.984	170.041	145.474	162.315	167.853	169.896	-0.171229	0.977892	0.284681		-0.0958703	0.811664	0.342419		-0.114424	0.971859	0.172432		-0.072713	0.60842	0.644888
sp|Q96BI3|APH1A_HUMAN	APH1A	Gamma-secretase subunit APH-1A OS=Homo sapiens OX=9606 GN=APH1A PE=1 SV=1	825	1	18.6875	19.2657	19.4125	14.825	13.4888	17.9926	17.5315	15.0622	14.58	20.789	16.9317	18.5532	23.0531	19.4198	19.6042	21.1438	0.108837	0.269079	0.745416		0.159694	0.727481	0.387661		-0.14691	0.379264	0.552027		-0.113034	0.231831	0.876198
tr|G3V1C3|G3V1C3_HUMAN	API5	Apoptosis inhibitor 5 OS=Homo sapiens OX=9606 GN=API5 PE=1 SV=1	3107	12	1979.96	1967.3	1999.85	1970.03	2065.24	2049.21	2041.92	1915.84	1958.56	1897.16	2051.26	2009.52	1956.81	1992.93	2047.78	2004.85	0.0190056	0.357824	0.668894		0.025866	0.83154	0.332068		0.0521518	3.08208	0.00555858	+	-0.0410788	1.1067	0.409921
sp|Q96GX9|MTNB_HUMAN	APIP	Methylthioribulose-1-phosphate dehydratase OS=Homo sapiens OX=9606 GN=APIP PE=1 SV=1	610	5	268.856	281.537	301.324	302.17	275.505	261.777	306.715	258.094	314.052	286.139	315.502	317.662	305.281	293.591	243.64	260.173	0.118385	1.25208	0.193601		-0.120699	0.57669	0.477179		-0.0376034	0.17928	0.778713		-0.0148365	0.0548518	0.973695
sp|Q06481|APLP2_HUMAN	APLP2	Amyloid-like protein 2 OS=Homo sapiens OX=9606 GN=APLP2 PE=1 SV=2	917	8	995.293	988.889	921.071	938.905	1090.66	1097.92	1091.16	1246.74	1269.43	1221.75	891.156	955.841	1026.74	926.356	1018.7	1092.04	-0.00632279	0.0319796	0.967948		0.0725873	0.389105	0.621461		0.186735	2.20731	0.0203049	+	0.37522	3.86753	0.00572549	+
sp|Q9HDC9|APMAP_HUMAN	APMAP	Adipocyte plasma membrane-associated protein OS=Homo sapiens OX=9606 GN=APMAP PE=1 SV=2	5262	8	369.2	428.642	369.224	358.617	364.896	379.261	391.42	403.301	425.496	406.276	366.653	424.356	436.867	395.602	417.703	407.801	0.101182	0.446357	0.59495		0.0970185	0.70332	0.401691		-0.00798109	0.0419199	0.950784		0.113375	0.831925	0.526976
sp|P04114|APOB_HUMAN	APOB	Apolipoprotein B-100 OS=Homo sapiens OX=9606 GN=APOB PE=1 SV=2	323	6	570.096	575.502	550.404	544.013	905.341	871.081	877.582	2222.81	2338.57	2110.19	555.75	509.956	606.834	537.602	575.175	553.736	-0.00966923	0.0419674	0.957505		-0.0117935	0.125359	0.866562		0.659895	5.73805	0	+	1.98868	4.33571	0.00634483	+
tr|B0QYD3|B0QYD3_HUMAN	APOBEC3B	DNA dC->dU-editing enzyme APOBEC-3B OS=Homo sapiens OX=9606 GN=APOBEC3B PE=1 SV=1	5135	3	69.9164	79.8993	88.9566	78.2799	63.8445	73.9464	70.9873	72.1911	88.261	81.8505	84.7111	86.7078	89.6657	80.3459	75.3056	80.8824	0.1397	0.843825	0.335746		-0.00312022	0.0131799	0.984748		-0.185188	0.960081	0.175887		0.0274734	0.0888619	0.955785
sp|Q9NRW3|ABC3C_HUMAN	APOBEC3C	DNA dC->dU-editing enzyme APOBEC-3C OS=Homo sapiens OX=9606 GN=APOBEC3C PE=1 SV=2	5135	3	179.322	214.721	182.844	193.194	183.991	145.807	174.029	172.718	173.767	177.218	218.533	193.234	189.26	158.078	191.02	180.863	0.0581034	0.269939	0.744774		-0.125001	0.551813	0.492676		-0.200412	0.754334	0.257392		-0.137721	1.01251	0.450366
sp|Q96AK3|ABC3D_HUMAN	APOBEC3D	DNA dC->dU-editing enzyme APOBEC-3D OS=Homo sapiens OX=9606 GN=APOBEC3D PE=1 SV=1	5135	2	59.298	71.8221	58.3424	55.7785	67.212	56.3311	63.6571	62.7315	65.3928	60.0419	61.9328	57.7534	58.3227	63.3778	58.8376	63.9568	-0.0409439	0.179324	0.828799		0.0234383	0.0941371	0.899539		0.028491	0.0932799	0.890022		0.0389309	0.166756	0.912242
sp|Q8IUX4|ABC3F_HUMAN	APOBEC3F	DNA dC->dU-editing enzyme APOBEC-3F OS=Homo sapiens OX=9606 GN=APOBEC3F PE=1 SV=3	5135	1	30.3899	33.4566	37.9458	34.2929	36.1393	35.8996	35.0776	26.3484	42.1009	37.1636	30.4	35.4869	32.8638	36.9854	40.7933	37.9894	-0.0459808	0.194184	0.816432		0.185028	1.17589	0.212732		0.0740956	0.462545	0.465951		0.0265524	0.0408587	0.980558
sp|Q9HC16|ABC3G_HUMAN	APOBEC3G	DNA dC->dU-editing enzyme APOBEC-3G OS=Homo sapiens OX=9606 GN=APOBEC3G PE=1 SV=1	5798	3	129.657	140.752	144.215	130.626	145.089	128.358	149.935	137.215	137.972	122.007	155.761	145.666	156.55	145.5	150.128	148.506	0.164161	1.62663	0.119048		0.120531	1.33741	0.177142		0.0484365	0.238985	0.706759		-0.0427872	0.241093	0.870031
sp|P02749|APOH_HUMAN	APOH	Beta-2-glycoprotein 1 OS=Homo sapiens OX=9606 GN=APOH PE=1 SV=3	8083	1	300.083	327.309	299.644	296.257	339.542	358.573	247.806	290.563	334.982	247.899	220.278	183.375	221.278	253.372	307.912	285.306	-0.558201	1.8187	0.0960177		-0.119433	0.553488	0.491224		0.0268276	0.0517027	0.937937		-0.0806327	0.228575	0.878399
sp|O14791-2|APOL1_HUMAN	APOL1	Isoform 2 of Apolipoprotein L1 OS=Homo sapiens OX=9606 GN=APOL1	7161	1	100.445	89.8489	93.1628	88.5919	298.234	326.229	283.71	96.5276	121.774	119.362	96.5261	75.6808	101.414	95.7201	106.753	110.257	-0.0380137	0.0952022	0.909651		0.163584	1.01045	0.26357		1.70182	4.52775	0.00028169	+	0.269092	0.939973	0.480157
tr|J3KQL8|J3KQL8_HUMAN	APOL2	Apolipoprotein L2 OS=Homo sapiens OX=9606 GN=APOL2 PE=1 SV=2	2158	6	245.898	219.103	242.762	232.171	357.748	376.882	360.596	239.344	190.19	221.214	240.37	222.591	253.458	237.274	254.61	238.674	0.0226997	0.125184	0.880657		0.0521949	0.465339	0.558677		0.636713	4.34519	0.0004	+	-0.120443	0.464477	0.726477
sp|O95236|APOL3_HUMAN	APOL3	Apolipoprotein L3 OS=Homo sapiens OX=9606 GN=APOL3 PE=1 SV=3	2172	2	156.28	145.975	152.13	153.668	116.943	122.68	111.917	163.509	145.416	173.275	116.366	122.932	116.887	143.539	158.675	137.543	-0.356529	3.56367	0.013	+	-0.0546106	0.326284	0.67386		-0.376032	2.58651	0.0109951	+	0.0771292	0.386504	0.776422
sp|Q9BUR5|MIC26_HUMAN	APOO	MICOS complex subunit MIC26 OS=Homo sapiens OX=9606 GN=APOO PE=1 SV=1	7036	1	11.3032	13.8126	12.5777	12.963	6.47485	12.3894	8.16555	10.5093	14.8808	13.3131	7.9104	14.0322	13.038	10.9824	10.1941	9.25853	-0.159234	0.21768	0.796968		-0.319735	1.63684	0.128715		-0.540447	0.739096	0.264399		0.0156591	0.032071	0.985879
sp|Q6UXV4|MIC27_HUMAN	APOOL	MICOS complex subunit MIC27 OS=Homo sapiens OX=9606 GN=APOOL PE=1 SV=1	4283	3	86.4876	102.267	99.6349	91.1413	84.0659	103.436	111.554	88.7512	101.839	95.2311	103.529	111.532	111.676	95.5897	88.6514	107.555	0.201319	1.50297	0.138737		0.0344543	0.127551	0.864548		0.0644064	0.176573	0.782748		0.00692638	0.0293206	0.985477
sp|P05067|A4_HUMAN	APP	Amyloid-beta precursor protein OS=Homo sapiens OX=9606 GN=APP PE=1 SV=3	917	10	808.9	823.44	812.15	774.475	908.851	884.224	915.123	1097.42	1113.02	1144.55	763.342	820.968	890.305	815.599	796.901	856.358	0.0331709	0.17887	0.829333		0.0320107	0.365019	0.643061		0.165993	2.9804	0.00620823	+	0.474906	4.96824	0	+
sp|P05067-4|A4_HUMAN	APP	Isoform APP695 of Amyloid-beta precursor protein OS=Homo sapiens OX=9606 GN=APP	917	1	7.10521	9.33866	10.1826	8.3002	8.91203	7.1691	9.84438	8.60053	5.42057	9.59855	14.7032	7.52243	13.4736	8.61819	10.0596	9.83407	0.400455	0.49822	0.552003		0.131907	0.435375	0.582711		-0.0143694	0.0275786	0.966974		-0.178089	0.245383	0.867589
sp|Q92624|APBP2_HUMAN	APPBP2	Amyloid protein-binding protein 2 OS=Homo sapiens OX=9606 GN=APPBP2 PE=1 SV=2	4093	2	33.2141	44.4884	52.1258	36.4281	45.2575	34.1923	36.2291	38.8082	40.5183	40.8344	44.6087	37.9189	34.9023	39.9728	42.9247	43.248	-0.0718804	0.1518	0.854816		0.0380848	0.0890316	0.905447		-0.0967428	0.197899	0.756175		-0.0314952	0.0735892	0.964453
sp|Q9UKG1|DP13A_HUMAN	APPL1	DCC-interacting protein 13-alpha OS=Homo sapiens OX=9606 GN=APPL1 PE=1 SV=1	4636	8	412.657	402.732	396.574	397.8	439.768	417.902	451.288	413.055	400.186	408.862	463.691	497.185	450.824	469.081	457.143	458.093	0.224571	1.60732	0.121996		0.197442	3.96502	0.00642857	+	0.116053	1.26352	0.0992744		0.0176071	0.405953	0.763555
sp|Q8NEU8|DP13B_HUMAN	APPL2	DCC-interacting protein 13-beta OS=Homo sapiens OX=9606 GN=APPL2 PE=1 SV=3	2698	14	1577.17	1621.07	1664.81	1648.9	1760.72	1558.17	1645.3	1742.91	1676.22	1649.24	1865.24	1864.43	1867.52	1936.77	1838.03	1816.89	0.196953	2.85789	0.0286027	+	0.194975	2.17287	0.0727046		0.0220031	0.145388	0.820862		0.0533838	0.845338	0.523344
sp|P07741|APT_HUMAN	APRT	Adenine phosphoribosyltransferase OS=Homo sapiens OX=9606 GN=APRT PE=1 SV=2	1214	5	371.719	341.787	349.578	352.042	369.363	343.835	362.594	340.658	323.77	324.346	376.284	361.42	348.955	330.813	341.698	333.767	0.0340118	0.350483	0.67478		-0.0763083	1.27297	0.191338		0.0195357	0.186553	0.769295		-0.101892	1.46013	0.285455
sp|Q7Z2E3|APTX_HUMAN	APTX	Aprataxin OS=Homo sapiens OX=9606 GN=APTX PE=1 SV=2	4583	4	594.427	595.136	591.887	585.167	574.884	579.484	576.82	562.07	596.181	602.11	604.35	601.376	591.571	588.375	604.179	590.869	0.018012	0.73287	0.390695		0.00679445	0.193048	0.793874		-0.036002	2.48571	0.0131055	+	-0.0125466	0.138655	0.931793
sp|O60306|AQR_HUMAN	AQR	RNA helicase aquarius OS=Homo sapiens OX=9606 GN=AQR PE=1 SV=4	3129	13	1285.04	1362.05	1311.35	1262.71	1183.07	1176.68	1227.03	1255.55	1252.33	1250.89	1305.54	1333.72	1187.21	1311.73	1310.93	1302.74	-0.0345664	0.23105	0.781228		0.00407796	0.0585306	0.936892		-0.126316	2.06442	0.0261362	+	-0.0584959	1.05544	0.434199
tr|Q96II5|Q96II5_HUMAN	ARAF	ARAF protein OS=Homo sapiens OX=9606 GN=ARAF PE=1 SV=1	4043	5	1125.17	1141.99	1123.36	1136.85	1106.35	1107.01	1175.94	1117.5	1165.13	1069.77	1080.97	919.942	1002.88	1066.51	1065.12	937.683	-0.179942	0.940067	0.295766		-0.148277	0.864557	0.317198		-0.00320863	0.0346426	0.959461		-0.0192834	0.191341	0.900373
sp|Q96P48|ARAP1_HUMAN	ARAP1	Arf-GAP with Rho-GAP domain, ANK repeat and PH domain-containing protein 1 OS=Homo sapiens OX=9606 GN=ARAP1 PE=1 SV=3	67	8	562.257	550.043	566.043	549.624	748.052	710.364	722.08	537.058	530.946	542.249	618.442	592.247	571.033	557.426	605.779	548.058	0.0919377	1.01045	0.271824		0.0331007	0.268382	0.724158		0.383753	3.22828	0.00436013	+	-0.0533332	1.9042	0.156281
sp|Q8WZ64|ARAP2_HUMAN	ARAP2	Arf-GAP with Rho-GAP domain, ANK repeat and PH domain-containing protein 2 OS=Homo sapiens OX=9606 GN=ARAP2 PE=1 SV=3	4303	2	63.6443	67.9557	67.766	69.5622	63.6477	49.9148	66.0591	74.9635	74.1778	68.9658	68.3895	65.8716	55.9485	52.2756	60.821	64.2085	-0.0891958	0.371984	0.658573		-0.190549	0.807662	0.344338		-0.177262	0.529915	0.402483		0.112646	1.12723	0.40076
sp|Q8WWN8|ARAP3_HUMAN	ARAP3	Arf-GAP with Rho-GAP domain, ANK repeat and PH domain-containing protein 3 OS=Homo sapiens OX=9606 GN=ARAP3 PE=1 SV=1	2921	7	458.163	448.949	454.387	464.74	424.992	402.101	422.377	451.494	446.69	444.038	453.034	450.846	429.178	445.278	448.762	422.436	-0.0394127	0.601718	0.472426		-0.0575596	0.799164	0.349827		-0.132848	1.67161	0.0491227	+	-0.0291348	1.15042	0.394952
tr|B0YIW6|B0YIW6_HUMAN	ARCN1	Coatomer subunit delta OS=Homo sapiens OX=9606 GN=ARCN1 PE=1 SV=1	4569	15	2249.73	2286.11	2175.14	2256.77	2417.56	2286.24	2217.24	2366.27	2116.05	2280.36	2211.86	2136.89	2187.13	2383.9	2222.49	2330.21	-0.041233	0.956004	0.29046		0.04415	0.556597	0.489103		0.0405943	0.411081	0.51936		0.00657978	0.0432846	0.979394
sp|O15033|AREL1_HUMAN	AREL1	Apoptosis-resistant E3 ubiquitin protein ligase 1 OS=Homo sapiens OX=9606 GN=AREL1 PE=1 SV=3	2273	1	52.6775	56.4399	47.902	44.9548	46.9816	48.8404	41.3313	43.4485	59.3924	48.6838	44.0748	37.7645	50.7026	53.4913	53.5777	45.7486	-0.197601	0.601186	0.472524		0.0142723	0.0470574	0.94727		-0.141481	0.639148	0.322651		-0.00627373	0.0135836	0.99346
sp|P84077|ARF1_HUMAN	ARF1	ADP-ribosylation factor 1 OS=Homo sapiens OX=9606 GN=ARF1 PE=1 SV=2	4272	6	754.872	737.644	760.843	747.299	778.754	741.978	744.771	711.786	791.722	705.369	799.564	813.884	797.819	716.577	780.152	792.498	0.0995891	3.13832	0.0243368	+	0.0233178	0.180595	0.805016		0.00933668	0.136867	0.830559		-0.0288384	0.189851	0.9014
sp|P18085|ARF4_HUMAN	ARF4	ADP-ribosylation factor 4 OS=Homo sapiens OX=9606 GN=ARF4 PE=1 SV=3	4272	3	201.871	238.518	226.33	216.819	213.77	233.911	233.492	205.074	209.726	197.556	235.502	230.149	245.955	233.713	236.549	257.864	0.104955	0.861717	0.328444		0.137216	1.00508	0.265538		0.0411847	0.249443	0.694843		-0.111642	0.934799	0.482633
sp|P84085|ARF5_HUMAN	ARF5	ADP-ribosylation factor 5 OS=Homo sapiens OX=9606 GN=ARF5 PE=1 SV=2	4272	3	892.688	890.134	827.919	830.351	906.41	850.065	845.398	848.742	820.224	830.215	795.902	799.426	901.07	869.069	871.628	867.039	-0.0494492	0.295027	0.722317		0.0159127	0.197164	0.789532		0.0119418	0.0977088	0.885408		-0.0455711	0.616736	0.640041
sp|P62330|ARF6_HUMAN	ARF6	ADP-ribosylation factor 6 OS=Homo sapiens OX=9606 GN=ARF6 PE=1 SV=2	4236	4	122.63	132.708	138.209	134.295	144.622	140.353	150.071	126.87	125.295	127.43	149.138	146.579	160.296	145.22	134.828	147.767	0.204316	1.8309	0.0936383		0.112189	0.99505	0.269989		0.136958	1.49806	0.0663489		-0.0592445	0.684192	0.604091
sp|Q8N6T3|ARFG1_HUMAN	ARFGAP1	ADP-ribosylation factor GTPase-activating protein 1 OS=Homo sapiens OX=9606 GN=ARFGAP1 PE=1 SV=2	1408	3	77.5901	71.1772	79.4906	69.8997	61.6521	63.3074	72.5703	76.127	65.1303	63.0303	64.1354	77.6878	67.5672	68.6758	87.7568	75.4773	-0.0974622	0.428305	0.608453		0.047279	0.151868	0.837864		-0.180538	0.946064	0.180363		-0.133245	0.596635	0.650813
sp|Q8N6H7|ARFG2_HUMAN	ARFGAP2	ADP-ribosylation factor GTPase-activating protein 2 OS=Homo sapiens OX=9606 GN=ARFGAP2 PE=1 SV=1	682	7	867.97	885.156	919.553	903.838	855.395	789.951	766.584	858.219	815.035	838.295	915.429	875.673	858.151	858.758	861.835	864.471	-0.0181195	0.211683	0.80366		-0.0529831	1.22643	0.201522		-0.154544	1.1771	0.116979		-0.0949215	1.61346	0.23175
sp|Q9NP61|ARFG3_HUMAN	ARFGAP3	ADP-ribosylation factor GTPase-activating protein 3 OS=Homo sapiens OX=9606 GN=ARFGAP3 PE=1 SV=1	3334	3	178.669	141.027	167.262	155.642	183.183	153.993	174.102	180.324	158.169	154.121	187.289	174.602	179.45	176.371	179.246	184.875	0.172572	1.01947	0.269397		0.170634	1.00607	0.26515		0.0869606	0.35253	0.579852		0.0336401	0.122816	0.939631
sp|Q9Y6D6|BIG1_HUMAN	ARFGEF1	Brefeldin A-inhibited guanine nucleotide-exchange protein 1 OS=Homo sapiens OX=9606 GN=ARFGEF1 PE=1 SV=2	679	13	1086.43	1038.1	1092.45	1128.9	1256	1143.71	1137.75	1090.25	1026.88	1028.57	1183.21	1162.96	1182.92	1124.39	1153.14	1144.16	0.11528	1.83773	0.093148		0.0706599	1.22598	0.201639		0.117241	0.966535	0.173649		-0.0511509	0.620064	0.638738
sp|Q9Y6D5|BIG2_HUMAN	ARFGEF2	Brefeldin A-inhibited guanine nucleotide-exchange protein 2 OS=Homo sapiens OX=9606 GN=ARFGEF2 PE=1 SV=3	679	10	1411.61	1519.89	1508.76	1506.25	1419.56	1437.23	1442.73	1460.32	1364.85	1438.56	1478.29	1539.36	1450.49	1562.16	1490.63	1497.05	0.00285851	0.0273205	0.972496		0.0291207	0.379934	0.630013		-0.0522296	0.906745	0.194103		-0.0648575	0.789488	0.54664
sp|Q5TH69|BIG3_HUMAN	ARFGEF3	Brefeldin A-inhibited guanine nucleotide-exchange protein 3 OS=Homo sapiens OX=9606 GN=ARFGEF3 PE=1 SV=3	5347	3	91.8961	89.4507	96.2105	104.704	166.798	155.833	147.439	90.2075	90.0859	95.9472	99.4943	101.282	102.446	87.8497	99.108	106.703	0.0833533	0.715234	0.399487		0.0326387	0.123291	0.868837		0.714118	3.62814	0.0022266	+	-0.0516207	0.378968	0.782389
sp|P53367|ARFP1_HUMAN	ARFIP1	Arfaptin-1 OS=Homo sapiens OX=9606 GN=ARFIP1 PE=1 SV=2	4247	7	507.866	535.81	539.114	533.351	533.42	510.706	521.251	528.395	478.819	545.731	540.417	507.085	520.871	564.504	518.019	530.158	-0.017219	0.200022	0.813007		0.0225092	0.202341	0.785769		-0.0197136	0.304725	0.628953		-0.0331988	0.20321	0.893359
tr|A0A087X1E4|A0A087X1E4_HUMAN	ARFIP2	Arfaptin-2 OS=Homo sapiens OX=9606 GN=ARFIP2 PE=1 SV=1	4247	5	185.122	190.338	188.204	179.453	213.767	191.299	195.324	195.25	180.03	180.792	193.591	184.828	179.876	180.997	198.579	200.434	0.00216349	0.0197688	0.980254		0.0563662	0.448703	0.572007		0.10601	0.818191	0.228473		-0.00393891	0.0306842	0.986359
sp|Q13795|ARFRP_HUMAN	ARFRP1	ADP-ribosylation factor-related protein 1 OS=Homo sapiens OX=9606 GN=ARFRP1 PE=1 SV=1	5634	3	670.191	697.755	684.765	679.03	724.395	696.6	691.734	733.989	684.695	704.039	684.372	747.039	801.328	730.454	709.716	730.37	0.121191	0.690756	0.415457		0.0832933	2.093	0.080301		0.0441806	0.814243	0.230881		0.0506975	0.664435	0.613109
sp|Q9NWB6|ARGL1_HUMAN	ARGLU1	Arginine and glutamate-rich protein 1 OS=Homo sapiens OX=9606 GN=ARGLU1 PE=1 SV=1	7045	4	841.915	799.67	790.968	758.49	861.776	803.447	817.655	823.725	774.261	766.656	686.74	704.721	725.826	765.044	779.622	742.049	-0.176144	2.21033	0.0652615		-0.0650132	0.842902	0.327094		0.0533788	0.56073	0.379376		-0.0171032	0.143013	0.928633
sp|Q07960|RHG01_HUMAN	ARHGAP1	Rho GTPase-activating protein 1 OS=Homo sapiens OX=9606 GN=ARHGAP1 PE=1 SV=1	4280	10	2213.7	2276.16	2171.89	2188.17	2267.63	2213.52	2149.81	2221.36	2105.18	2167.06	2217.1	2193.13	2238.62	2389.28	2247.42	2196.83	0.00265727	0.0538631	0.950763		0.0413219	0.424289	0.590265		-0.0015221	0.0188286	0.97703		-0.0317257	0.51076	0.700793
sp|A1A4S6|RHG10_HUMAN	ARHGAP10	Rho GTPase-activating protein 10 OS=Homo sapiens OX=9606 GN=ARHGAP10 PE=1 SV=1	1960	3	223.627	228.476	218.771	237.353	250.917	210.256	227.666	210.432	221.443	227.471	241.368	253.01	244.454	243.752	252.301	260.006	0.117599	1.82991	0.0935976		0.150637	1.96086	0.0909474		0.0130272	0.0555585	0.933573		-0.0470742	0.497856	0.708657
sp|Q6P4F7|RHGBA_HUMAN	ARHGAP11A	Rho GTPase-activating protein 11A OS=Homo sapiens OX=9606 GN=ARHGAP11A PE=1 SV=2	4174	6	131.094	135.676	119.92	134.99	98.173	94.8047	102.391	117.53	124.411	125.573	151.062	144.976	139.846	138.802	132.781	143.267	0.156842	1.51961	0.136194		0.0855047	0.791009	0.3531		-0.404584	3.23567	0.00438835	+	-0.0891999	0.850813	0.52047
sp|Q8IWW6|RHG12_HUMAN	ARHGAP12	Rho GTPase-activating protein 12 OS=Homo sapiens OX=9606 GN=ARHGAP12 PE=1 SV=1	1568	10	999.786	966.56	997.889	1012.04	992.971	894.574	961.489	1008.6	944.781	968.146	1000.11	977.123	963.141	994.492	977.396	956.829	-0.0203468	0.413148	0.620707		-0.0260834	0.546882	0.496172		-0.0670638	0.573142	0.370255		-0.0299759	0.394812	0.771777
sp|Q68EM7|RHG17_HUMAN	ARHGAP17	Rho GTPase-activating protein 17 OS=Homo sapiens OX=9606 GN=ARHGAP17 PE=1 SV=1	344	7	574.767	538.869	583.674	580.626	548.648	494.063	533.784	574.711	582.406	552.446	594.63	570.894	550.037	571.872	619.395	606.969	0.00599366	0.0490982	0.953344		0.073804	0.784374	0.356604		-0.116644	0.985387	0.167754		0.00131087	0.0124569	0.994547
sp|Q8N392|RHG18_HUMAN	ARHGAP18	Rho GTPase-activating protein 18 OS=Homo sapiens OX=9606 GN=ARHGAP18 PE=1 SV=3	1499	14	1193.31	1198.28	1239.14	1234.91	1076.51	1060.68	1042.91	1293.22	1249.26	1227.01	1128.05	1097.78	1014.75	1126.9	1178.78	1162.94	-0.172572	1.27681	0.187021		-0.0732763	1.42396	0.159852		-0.198431	3.77186	0.00116571	+	0.046643	0.794245	0.545095
sp|Q14CB8-2|RHG19_HUMAN	ARHGAP19	Isoform 2 of Rho GTPase-activating protein 19 OS=Homo sapiens OX=9606 GN=ARHGAP19	7043	1	13.8398	16.2676	14.7486	14.6018	12.4423	12.6447	15.0025	14.0569	11.4056	11.5824	17.9876	15.2007	15.8134	11.0457	10.396	11.2821	0.134709	0.68477	0.419708		-0.444871	3.12804	0.0241277	+	-0.156391	0.686784	0.294194		-0.271735	1.05898	0.431101
sp|Q5T5U3|RHG21_HUMAN	ARHGAP21	Rho GTPase-activating protein 21 OS=Homo sapiens OX=9606 GN=ARHGAP21 PE=1 SV=2	1154	8	452.081	447.927	462.013	484.965	496.005	504.492	516.739	499.829	467.242	508.829	505.912	494.03	456.791	503.219	438.122	483.371	0.071925	0.605576	0.470749		0.0388019	0.226092	0.762613		0.131793	2.07125	0.0260899	+	0.0911804	0.923165	0.487138
sp|Q9P227|RHG23_HUMAN	ARHGAP23	Rho GTPase-activating protein 23 OS=Homo sapiens OX=9606 GN=ARHGAP23 PE=1 SV=2	1154	5	137.246	147.912	143.59	150.911	160.672	156.02	169.692	133.189	132.249	129.929	148.117	145.343	133.007	141.367	137.664	143.182	-0.0283888	0.190822	0.821004		-0.0414735	0.546997	0.496273		0.161967	1.66362	0.0496178	+	-0.136137	1.8343	0.176076
sp|Q9UNA1|RHG26_HUMAN	ARHGAP26	Rho GTPase-activating protein 26 OS=Homo sapiens OX=9606 GN=ARHGAP26 PE=1 SV=1	6105	2	62.3322	55.4029	68.95	67.9659	53.9857	68.5073	71.1534	59.4615	56.6256	56.5885	73.3252	73.0588	60.5865	48.9622	65.257	61.8045	0.115713	0.427839	0.608888		-0.123238	0.340352	0.661724		0.0148474	0.0343699	0.959844		-0.140435	0.832041	0.527345
tr|A0A0G2JNY3|A0A0G2JNY3_HUMAN	ARHGAP27	Rho GTPase-activating protein 27 OS=Homo sapiens OX=9606 GN=ARHGAP27 PE=1 SV=1	756	8	650.455	618.37	682.518	672.634	705.379	702.901	708.951	669.789	664.226	655.719	789.557	754.774	694.953	724.505	728.362	737.132	0.185349	1.28679	0.185339		0.155206	1.86226	0.102621		0.106483	1.37175	0.0823159		0.0168341	0.194446	0.898424
sp|Q52LW3|RHG29_HUMAN	ARHGAP29	Rho GTPase-activating protein 29 OS=Homo sapiens OX=9606 GN=ARHGAP29 PE=1 SV=2	1107	8	1423.79	1485.45	1390.96	1426.33	1589.07	1562.8	1499.28	1361.06	1208.13	1400.24	1263.49	1156.34	1235.06	1458.11	1399.15	1347.02	-0.233403	1.92823	0.087065		-0.0311158	0.326786	0.673399		0.114939	1.68282	0.0483355	+	-0.116196	0.676917	0.607619
sp|A7KAX9|RHG32_HUMAN	ARHGAP32	Rho GTPase-activating protein 32 OS=Homo sapiens OX=9606 GN=ARHGAP32 PE=1 SV=1	8078	1	13.3985	16.5147	17.8153	14.1171	15.8157	15.022	16.2141	14.1845	16.8321	15.5786	13.1811	16.5608	11.8333	11.0717	16.0712	17.6274	-0.162731	0.395825	0.635838		-0.069371	0.107851	0.884663		0.0294654	0.104142	0.87657		0.012603	0.0361295	0.984018
sp|Q9NRY4|RHG35_HUMAN	ARHGAP35	Rho GTPase-activating protein 35 OS=Homo sapiens OX=9606 GN=ARHGAP35 PE=1 SV=3	1815	16	2737.08	2791.14	2791.28	2884.72	2818.58	2721.68	2729.1	2830.79	2829.86	2774.69	2716.8	2697.63	2681.06	2827.12	2876.8	2841.16	-0.0535778	1.44119	0.151344		0.0243802	0.63661	0.439897		-0.0230821	0.448561	0.479847		0.00570806	0.113698	0.945532
sp|Q9C0H5-2|RHG39_HUMAN	ARHGAP39	Isoform 2 of Rho GTPase-activating protein 39 OS=Homo sapiens OX=9606 GN=ARHGAP39	935	1	74.4909	74.9265	77.2241	76.1638	67.6032	74.6647	75.1689	69.2323	76.7167	70.8928	73.6886	77.5894	67.4984	76.1495	64.1802	87.9025	-0.0561228	0.355664	0.66999		-0.00455193	0.0107633	0.986916		-0.0642896	0.491733	0.436479		-0.0679659	0.576654	0.662964
sp|P98171-2|RHG04_HUMAN	ARHGAP4	Isoform 2 of Rho GTPase-activating protein 4 OS=Homo sapiens OX=9606 GN=ARHGAP4	1349	4	159.313	164.346	162.459	167.387	178.141	159.398	159.857	170.537	157.196	161.232	186.242	160.822	158.531	175.569	161.216	152.461	0.0411702	0.19543	0.816722		-0.00480808	0.02518	0.97139		0.0195125	0.12388	0.848734		-0.00403671	0.0351387	0.983685
sp|Q5TG30|RHG40_HUMAN	ARHGAP40	Rho GTPase-activating protein 40 OS=Homo sapiens OX=9606 GN=ARHGAP40 PE=3 SV=3	2369	1	21.9705	21.3919	19.4751	21.9416	17.4599	19.3631	22.7086	17.8691	24.3364	18.4426	23.4044	15.7864	20.0939	16.0745	23.9257	23.8292	-0.11791	0.256877	0.757052		-0.0166277	0.0272796	0.969429		-0.101785	0.336771	0.59545		-0.0807747	0.199597	0.895419
sp|A6NI28|RHG42_HUMAN	ARHGAP42	Rho GTPase-activating protein 42 OS=Homo sapiens OX=9606 GN=ARHGAP42 PE=1 SV=3	1960	4	195.666	197.612	198.023	220.951	218.188	218.422	208.073	176.858	207.997	223.148	238.962	226.438	173.794	198.059	197.05	214.939	0.057644	0.137083	0.869096		0.00269192	0.0155513	0.981582		0.0831454	0.835406	0.22163		-0.0077295	0.0233247	0.989453
sp|Q92619|HMHA1_HUMAN	ARHGAP45	Rho GTPase-activating protein 45 OS=Homo sapiens OX=9606 GN=ARHGAP45 PE=1 SV=2	1091	8	616.566	624.588	637.73	640.27	613.803	621.791	607.024	645.993	619.423	652.402	640.199	565.159	580.138	646.751	635.947	616.408	-0.0835055	0.578512	0.490093		0.00730425	0.108976	0.883954		-0.0360437	1.10928	0.132446		0.0213716	0.326303	0.818077
sp|Q13017|RHG05_HUMAN	ARHGAP5	Rho GTPase-activating protein 5 OS=Homo sapiens OX=9606 GN=ARHGAP5 PE=1 SV=2	4122	10	343.922	369.543	365.541	369.223	382.326	358.32	375.323	373.575	340.05	347.661	379.981	380.014	372.482	370.163	358.431	360.092	0.0607962	1.06205	0.257049		0.00381992	0.04589	0.948941		0.0391409	0.460745	0.467408		-0.0339786	0.281527	0.846249
sp|P52565|GDIR1_HUMAN	ARHGDIA	Rho GDP-dissociation inhibitor 1 OS=Homo sapiens OX=9606 GN=ARHGDIA PE=1 SV=3	1142	4	356.346	369.304	380.895	379.882	377.204	359.766	382.372	371.608	369.124	368.851	368.916	364.078	378.77	345.097	384.87	366.226	-0.00363744	0.0449524	0.956078		-0.0252223	0.184851	0.80011		0.00586886	0.0586805	0.929209		-0.00628304	0.0975776	0.953661
sp|P52566|GDIR2_HUMAN	ARHGDIB	Rho GDP-dissociation inhibitor 2 OS=Homo sapiens OX=9606 GN=ARHGDIB PE=1 SV=3	2796	6	701.4	786.052	749.763	767.542	736.523	736.011	691.183	759.274	719.344	713.965	834.574	863.835	842.37	802.826	804.222	820.884	0.174198	1.96918	0.083107		0.108734	1.30339	0.186141		-0.0580438	0.570688	0.372103		-0.0388337	0.367851	0.790464
tr|M0QZR4|M0QZR4_HUMAN	ARHGEF1	Rho guanine nucleotide exchange factor 1 OS=Homo sapiens OX=9606 GN=ARHGEF1 PE=1 SV=1	900	16	1054.63	1034.53	1006.13	1065.18	1168.07	1130.32	1136.7	1061.09	1010.75	1106.33	1191.28	1134.56	1073.28	1082.51	1053.9	1085.68	0.122484	1.04836	0.260586		0.0464991	1.01827	0.261013		0.13883	2.72125	0.00920965	+	0.0258451	0.235749	0.873761
sp|Q9HCE6|ARGAL_HUMAN	ARHGEF10L	Rho guanine nucleotide exchange factor 10-like protein OS=Homo sapiens OX=9606 GN=ARHGEF10L PE=1 SV=4	1097	6	366.341	389.325	409.445	409.766	375.267	380.073	358.382	407.125	375.901	377.929	505.515	447.156	426.962	456.099	460.07	436.596	0.221889	1.1483	0.227345		0.196842	2.08255	0.0825524		-0.0837607	0.882674	0.202719		-0.0243448	0.175371	0.908822
sp|O15085-2|ARHGB_HUMAN	ARHGEF11	Isoform 2 of Rho guanine nucleotide exchange factor 11 OS=Homo sapiens OX=9606 GN=ARHGEF11	3185	4	474.918	467.661	490.387	472.644	517.836	497.397	511.112	497.321	462.482	466.334	527.944	498.333	511.989	489.475	536.037	515.78	0.105915	1.58898	0.124034		0.108154	1.05079	0.251083		0.0948901	1.96012	0.030662	+	-0.0036413	0.0330434	0.985599
sp|Q9NZN5|ARHGC_HUMAN	ARHGEF12	Rho guanine nucleotide exchange factor 12 OS=Homo sapiens OX=9606 GN=ARHGEF12 PE=1 SV=1	4366	11	808.019	802.104	836.937	875.996	822.011	814.344	805.777	838.607	833.24	837.201	899.83	831.846	809.21	862.836	873.928	872.864	0.0272722	0.190397	0.821308		0.0672305	0.993513	0.270413		-0.0284966	0.39093	0.540668		0.0105448	0.129927	0.934491
sp|Q5VV41|ARHGG_HUMAN	ARHGEF16	Rho guanine nucleotide exchange factor 16 OS=Homo sapiens OX=9606 GN=ARHGEF16 PE=1 SV=1	4371	8	452.299	435.199	447.286	437.956	450.171	458.641	456.197	452.685	444.158	432.318	429.483	460.235	427.552	428.604	465.387	433.84	-0.0140434	0.135654	0.870004		-0.0026541	0.0217723	0.974784		0.0380979	1.23909	0.104511		-0.000509448	0.00716828	0.996806
sp|Q96PE2|ARHGH_HUMAN	ARHGEF17	Rho guanine nucleotide exchange factor 17 OS=Homo sapiens OX=9606 GN=ARHGEF17 PE=1 SV=1	4333	3	157.788	159.446	163.31	166.293	164.357	153.825	160.309	174.109	161.913	171.852	161.408	155.632	152.269	175.193	170.899	174.302	-0.0479412	0.727214	0.393823		0.10146	2.33108	0.0582426		-0.0201062	0.239237	0.706643		0.0656931	0.779356	0.551839
sp|Q6ZSZ5-5|ARHGI_HUMAN	ARHGEF18	Isoform 2 of Rho guanine nucleotide exchange factor 18 OS=Homo sapiens OX=9606 GN=ARHGEF18	1706	9	659.217	678.497	669.17	662.863	764.868	770.394	733.118	629.166	667.935	671.883	692.194	697.53	641.439	671.009	671.458	664.25	0.0197031	0.177744	0.82984		0.00324032	0.113858	0.878724		0.179739	2.13341	0.0230519	+	-0.0247587	0.297315	0.836708
tr|A0A5F9ZI21|A0A5F9ZI21_HUMAN	ARHGEF2	Rho guanine nucleotide exchange factor 2 OS=Homo sapiens OX=9606 GN=ARHGEF2 PE=4 SV=1	1576	10	702.924	708.417	679.445	682.747	845.481	811.38	803.542	682.571	654.247	667.851	764.751	739.986	691.274	717.664	740.321	739.269	0.077163	0.685401	0.419274		0.0791008	1.86307	0.102576		0.242089	2.90601	0.00698667	+	-0.0533053	1.1144	0.405257
sp|Q96DR7|ARHGQ_HUMAN	ARHGEF26	Rho guanine nucleotide exchange factor 26 OS=Homo sapiens OX=9606 GN=ARHGEF26 PE=1 SV=4	3602	4	125.897	145.541	138.376	150.544	109.219	105.367	109.147	130.413	136.398	144.666	136.264	140.846	123.037	136.137	135.985	131.38	-0.0699071	0.36543	0.664775		-0.0556947	0.395089	0.61694		-0.373472	2.32772	0.0170214	+	-0.0285668	0.152547	0.923588
sp|Q8N1W1-6|ARG28_HUMAN	ARHGEF28	Isoform 6 of Rho guanine nucleotide exchange factor 28 OS=Homo sapiens OX=9606 GN=ARHGEF28	3685	4	533.663	532.93	540.394	565.667	468.837	469.294	466.658	628.294	545.288	610.764	534.839	496.015	494.081	501.964	505.373	534.088	-0.0962146	0.987161	0.280399		-0.08029	1.07399	0.241846		-0.213645	2.79351	0.00820842	+	0.128731	0.77932	0.551333
tr|A0A5F9ZH52|A0A5F9ZH52_HUMAN	ARHGEF35	Rho guanine nucleotide exchange factor 35 OS=Homo sapiens OX=9606 GN=ARHGEF35 PE=4 SV=1	1127	1	16.3108	15.4442	20.7514	19.7544	19.175	15.7381	12.1013	16.7379	11.8623	22.5545	20.7778	16.1811	16.2852	23.25	21.5452	18.3056	-0.0244308	0.0537585	0.950876		0.223559	0.729581	0.386191		-0.219185	0.412915	0.517719		-0.121096	0.151431	0.924689
tr|E7EV07|E7EV07_HUMAN	ARHGEF4	Rho guanine nucleotide exchange factor 4 OS=Homo sapiens OX=9606 GN=ARHGEF4 PE=1 SV=2	4666	1	20.7803	18.5605	20.722	19.2483	17.1776	20.2445	20.1109	14.0923	21.5127	21.523	16.6653	18.6747	19.8001	18.7996	25.8702	18.7608	-0.111357	0.570757	0.4954		0.0774016	0.174116	0.811369		-0.0504912	0.21988	0.728444		-0.083845	0.141029	0.92998
tr|A0A0C4DFY6|A0A0C4DFY6_HUMAN	ARHGEF4	Rho guanine nucleotide exchange factor 4 (Fragment) OS=Homo sapiens OX=9606 GN=ARHGEF4 PE=1 SV=2	4666	1	10.0179	6.4628	5.20464	11.8575	12.7649	9.68049	10.0973	9.03577	8.58824	10.1825	10.7167	8.5974	9.57525	10.4058	8.34165	9.91967	0.270618	0.389208	0.641351		0.258932	0.368335	0.641004		0.437314	0.659324	0.310378		0.217628	0.306646	0.833012
sp|Q8TER5|ARH40_HUMAN	ARHGEF40	Rho guanine nucleotide exchange factor 40 OS=Homo sapiens OX=9606 GN=ARHGEF40 PE=1 SV=3	854	6	172.294	162.741	181.64	180.25	170.936	168.75	170.564	179.204	188.713	172.924	204.17	203.509	179.479	190.631	200.039	199.27	0.166593	1.0389	0.262906		0.17563	1.97299	0.090499		-0.0334139	0.367381	0.56595		0.0496787	0.417767	0.754852
tr|A0A2R8YF49|A0A2R8YF49_HUMAN	ARHGEF5	Rho guanine nucleotide exchange factor 5 OS=Homo sapiens OX=9606 GN=ARHGEF5 PE=1 SV=1	1127	5	210.996	221.686	244.853	240.452	231.982	211.255	213.829	247.562	235.356	234.559	251.842	222.449	224.957	218.615	240.328	231.996	0.0226981	0.108449	0.896384		0.00664949	0.035474	0.961509		-0.0660309	0.441404	0.487371		0.0616789	0.480209	0.718239
sp|Q14155-5|ARHG7_HUMAN	ARHGEF7	Isoform 5 of Rho guanine nucleotide exchange factor 7 OS=Homo sapiens OX=9606 GN=ARHGEF7	5789	9	743.857	767.036	784.218	779.355	847.733	817.801	877.72	725.95	736.11	771.137	790.56	749.543	751.154	817.21	741.045	731.637	-0.00929877	0.110348	0.894512		-0.0114984	0.0728757	0.923618		0.141076	1.679	0.0486619	+	-0.0463708	0.655665	0.61988
sp|O14497|ARI1A_HUMAN	ARID1A	AT-rich interactive domain-containing protein 1A OS=Homo sapiens OX=9606 GN=ARID1A PE=1 SV=3	36	14	998.165	909.233	972.443	960.422	941.106	887.883	860.558	1067.2	995.439	1006.36	956.166	955.617	889.666	933.979	1012.46	1038.92	-0.0399835	0.378714	0.652365		0.051096	0.389969	0.620403		-0.0989696	0.983499	0.168179		0.0917527	1.06359	0.429872
tr|A0A3F2YNW7|A0A3F2YNW7_HUMAN	ARID1B	AT-rich interactive domain-containing protein 1B OS=Homo sapiens OX=9606 GN=ARID1B PE=1 SV=1	36	8	402.984	381.701	395.737	401.15	379.851	342.531	375.631	386.133	386.882	398.036	412.389	393.538	384.262	377.829	385.198	387.322	0.00457069	0.0443448	0.956638		-0.0440067	1.03787	0.254286		-0.112634	0.896926	0.198076		-0.0183322	0.341149	0.808181
sp|Q68CP9|ARID2_HUMAN	ARID2	AT-rich interactive domain-containing protein 2 OS=Homo sapiens OX=9606 GN=ARID2 PE=1 SV=2	3589	7	862.082	862.758	851.516	887.775	854.87	810.717	832.334	812.896	858.425	832.803	797.902	848.656	780.095	831.871	795.636	815.167	-0.0992385	1.00614	0.272757		-0.0890642	1.72597	0.116982		-0.0568968	0.98497	0.167762		-0.0533395	0.897931	0.499095
sp|Q99856|ARI3A_HUMAN	ARID3A	AT-rich interactive domain-containing protein 3A OS=Homo sapiens OX=9606 GN=ARID3A PE=1 SV=2	7488	1	64.9003	139.541	53.1504	54.5963	83.4514	78.206	86.8531	55.4352	46.5979	54.7633	114.056	72.5832	42.3907	66.6517	71.9645	53.7787	-0.0215803	0.0135904	0.986902		-0.169611	0.183857	0.80142		0.208999	0.243965	0.70119		-0.458506	0.588726	0.65618
sp|P29374|ARI4A_HUMAN	ARID4A	AT-rich interactive domain-containing protein 4A OS=Homo sapiens OX=9606 GN=ARID4A PE=1 SV=3	117	3	154.516	159.423	157.93	147.723	156.338	154.327	153.917	139.684	156.07	156.788	159.794	171.778	141.02	141.966	154.589	151.873	0.0201872	0.0785322	0.925966		-0.0517494	0.49796	0.530772		0.000238272	0.00303021	0.996358		-0.0396406	0.253958	0.863163
sp|Q4LE39|ARI4B_HUMAN	ARID4B	AT-rich interactive domain-containing protein 4B OS=Homo sapiens OX=9606 GN=ARID4B PE=1 SV=2	6544	7	685.112	637.266	701.167	694.884	585.679	635.625	626.008	711.06	712.961	730.751	660.037	620.159	622.126	641.269	680.818	647.774	-0.0995609	1.16243	0.221984		-0.0491283	0.542938	0.498912		-0.142202	1.44232	0.0721665		0.0807	1.11293	0.40648
sp|Q9Y4X5|ARI1_HUMAN	ARIH1	E3 ubiquitin-protein ligase ARIH1 OS=Homo sapiens OX=9606 GN=ARIH1 PE=1 SV=2	3756	7	1023.23	1081.13	1050.29	1058.69	1077.58	1078.24	1043.02	1052.48	1065.02	1023.3	982.049	967.064	1006.63	1085.75	1028.96	1060.88	-0.0963234	1.97958	0.0833887		0.00702884	0.0898992	0.905339		0.0177289	0.325219	0.60695		-0.00871704	0.137308	0.932176
sp|O95376|ARI2_HUMAN	ARIH2	E3 ubiquitin-protein ligase ARIH2 OS=Homo sapiens OX=9606 GN=ARIH2 PE=1 SV=1	970	2	117.17	104.693	124.84	116.888	110.023	104.449	122.52	114.719	118.73	129.217	107.706	134.2	103.891	106.094	110.007	112.721	-0.0144759	0.037745	0.960849		-0.0780956	0.602539	0.460166		-0.0454535	0.204983	0.747685		0.0618677	0.357859	0.796642
tr|F8VYN9|F8VYN9_HUMAN	ARL1	ADP-ribosylation factor-like protein 1 OS=Homo sapiens OX=9606 GN=ARL1 PE=1 SV=1	2051	5	807.041	907.312	815.245	761.449	920.835	841.043	836.952	832.062	857.854	724.718	819.255	792.113	894.51	785.411	847.952	862.708	0.0228167	0.112724	0.892653		0.0178788	0.0965465	0.897246		0.0758669	0.49112	0.437091		-0.0326079	0.130558	0.934472
sp|Q8N8R7|AL14E_HUMAN	ARL14EP	ARL14 effector protein OS=Homo sapiens OX=9606 GN=ARL14EP PE=1 SV=1	4107	2	79.0597	75.7268	79.9001	79.2022	60.5651	69.0678	63.736	70.3948	79.3569	85.7473	74.0882	75.7486	65.4512	69.3784	76.065	84.4358	-0.131577	0.754411	0.382596		-0.0386796	0.163708	0.822807		-0.285668	1.57866	0.0575164		-0.00389907	0.0145196	0.993904
sp|P0DKL9|A14EL_HUMAN	ARL14EPL	ARL14 effector protein-like OS=Homo sapiens OX=9606 GN=ARL14EPL PE=4 SV=1	7653	1	102.82	92.3178	113.386	126.194	72.7972	76.8116	76.762	109.594	115.472	113.364	103.238	105.812	92.5262	93.1582	100.937	116.786	-0.105285	0.400007	0.632217		-0.0653961	0.186449	0.798642		-0.51715	1.99749	0.0290257	+	0.0631363	0.248057	0.866292
sp|Q0P5N6|ARL16_HUMAN	ARL16	ADP-ribosylation factor-like protein 16 OS=Homo sapiens OX=9606 GN=ARL16 PE=1 SV=1	7849	1	14.1753	11.0997	6.44782	8.49963	8.9199	6.82449	8.26203	7.10891	5.89276	8.0387	8.1167	14.7342	11.0834	8.10778	10.229	10.3651	0.188948	0.212929	0.8023		-0.0193045	0.0239056	0.972972		-0.277077	0.441682	0.487127		-0.469981	0.798752	0.543456
sp|P36404|ARL2_HUMAN	ARL2	ADP-ribosylation factor-like protein 2 OS=Homo sapiens OX=9606 GN=ARL2 PE=1 SV=4	5862	10	1117.62	1157.96	1121.11	1139.19	1020.41	1110.15	1098.26	1147.17	1084.3	1132.57	1089.54	1084.02	985.203	992.492	982.561	1102.05	-0.10837	0.848797	0.334364		-0.146592	0.98726	0.272408		-0.0761968	0.754297	0.257373		-0.0164233	0.228592	0.878491
tr|H3BM52|H3BM52_HUMAN	ARL2BP	ADP-ribosylation factor-like protein 2-binding protein (Fragment) OS=Homo sapiens OX=9606 GN=ARL2BP PE=1 SV=1	7182	2	29.7785	30.4976	33.8053	35.1472	25.3303	27.5682	35.6261	35.2595	40.2491	30.1426	25.7752	19.8507	25.6121	31.1502	29.8899	26.2652	-0.451073	1.30987	0.177929		-0.151056	0.743731	0.379098		-0.142805	0.353171	0.579166		0.117851	0.352236	0.801543
sp|P36405|ARL3_HUMAN	ARL3	ADP-ribosylation factor-like protein 3 OS=Homo sapiens OX=9606 GN=ARL3 PE=1 SV=2	7792	1	16.2338	20.8215	18.5451	17.8636	16.14	14.4822	16.506	16.0858	15.8349	16.5401	17.4153	21.4265	21.8731	15.7794	14.3109	21.3184	0.138353	0.462685	0.583106		-0.115532	0.231671	0.757541		-0.22198	1.18403	0.115671		-0.179663	1.04079	0.438609
sp|P40617|ARL4A_HUMAN	ARL4A	ADP-ribosylation factor-like protein 4A OS=Homo sapiens OX=9606 GN=ARL4A PE=1 SV=2	7204	2	105.878	122.946	130.44	123.841	98.6592	98.9438	104.05	121.009	116.936	105.439	117.198	128.688	127.897	123.142	138.342	122.656	0.0478602	0.246156	0.767437		0.0863175	0.440115	0.579133		-0.260581	1.66825	0.0493881	+	-0.0756617	0.366356	0.790966
sp|P56559-2|ARL4C_HUMAN	ARL4C	Isoform 2 of ADP-ribosylation factor-like protein 4C OS=Homo sapiens OX=9606 GN=ARL4C	7575	1	7.71897	8.17095	6.07507	9.36214	8.05646	7.82553	6.27681	6.28606	7.5502	8.90058	7.47546	8.02959	8.13544	6.92636	6.17091	9.2384	0.0250734	0.0636917	0.942011		-0.0770884	0.130916	0.860699		-0.0760408	0.168447	0.792475		-0.0446395	0.0815948	0.959786
sp|Q9H0F7-2|ARL6_HUMAN	ARL6	Isoform 2 of ADP-ribosylation factor-like protein 6 OS=Homo sapiens OX=9606 GN=ARL6	8032	1	50.6164	60.1608	66.9131	57.0076	69.1651	68.0337	67.2903	62.5571	56.4898	65.3834	56.513	64.6976	54.2709	46.5207	59.6787	65.4639	-0.00130995	0.00381844	0.996972		-0.0435384	0.0902324	0.904716		0.22343	1.12772	0.127971		0.0718949	0.282157	0.845626
sp|Q66PJ3|AR6P4_HUMAN	ARL6IP4	ADP-ribosylation factor-like protein 6-interacting protein 4 OS=Homo sapiens OX=9606 GN=ARL6IP4 PE=1 SV=2	1055	1	11.4097	11.8619	9.60336	11.2589	7.45779	9.79934	10.8657	12.8633	13.1781	10.4543	6.98644	10.0397	13.0002	14.6521	13.3614	10.1461	-0.181692	0.251145	0.762375		0.192716	0.451417	0.570006		-0.248199	0.58252	0.363149		0.137848	0.467324	0.724608
sp|Q66PJ3-3|AR6P4_HUMAN	ARL6IP4	Isoform 3 of ADP-ribosylation factor-like protein 6-interacting protein 4 OS=Homo sapiens OX=9606 GN=ARL6IP4	1055	1	8.2843	8.48292	6.11986	5.3054	12.7539	15.9457	10.1956	9.38432	4.85064	7.46506	11.9239	12.7334	11.3444	8.41427	11.8121	13.3082	0.794438	1.85684	0.0905941		0.66745	1.24967	0.197805		0.883637	1.70993	0.0461561	+	0.0138852	0.0139855	0.993125
sp|O75915|PRAF3_HUMAN	ARL6IP5	PRA1 family protein 3 OS=Homo sapiens OX=9606 GN=ARL6IP5 PE=1 SV=1	3618	1	15.501	18.8863	14.9285	11.9066	11.1962	17.6642	18.3955	18.8972	13.8267	18.2911	18.5671	26.0362	21.3761	10.363	15.4508	17.9397	0.528206	1.33706	0.171606		-0.0874567	0.114764	0.877578		0.0261804	0.0327077	0.961482		0.157374	0.333236	0.814662
sp|Q8N6S5|AR6P6_HUMAN	ARL6IP6	ADP-ribosylation factor-like protein 6-interacting protein 6 OS=Homo sapiens OX=9606 GN=ARL6IP6 PE=1 SV=1	1156	1	9.83366	11.5047	11.5763	12.7515	10.7194	14.0311	10.6265	15.1102	11.3602	11.6638	9.61329	14.5151	11.6246	14.3856	8.46209	12.9849	0.0476464	0.0873966	0.917166		0.0352158	0.0469509	0.947355		0.04054	0.0935656	0.889969		0.148883	0.40479	0.76348
sp|Q96BM9|ARL8A_HUMAN	ARL8A	ADP-ribosylation factor-like protein 8A OS=Homo sapiens OX=9606 GN=ARL8A PE=1 SV=1	4820	3	107.123	119.752	99.4731	95.7979	113.007	102.46	128.365	105.518	106.405	118.18	114.903	124.733	130.976	116.292	119.295	116.41	0.230413	1.29718	0.182064		0.15806	0.955945	0.282455		0.118134	0.429043	0.50148		0.063573	0.297484	0.836716
sp|Q9NVJ2|ARL8B_HUMAN	ARL8B	ADP-ribosylation factor-like protein 8B OS=Homo sapiens OX=9606 GN=ARL8B PE=1 SV=1	4820	1	116.672	115.049	119.24	112.647	116.077	125.757	141.609	126.846	147.9	131.817	140.421	166.024	162.081	133.139	132.624	142.43	0.426693	1.60216	0.122611		0.230913	2.08781	0.0809378		0.136615	0.620212	0.334427		0.222816	1.15227	0.393227
sp|Q9NVT9|ARMC1_HUMAN	ARMC1	Armadillo repeat-containing protein 1 OS=Homo sapiens OX=9606 GN=ARMC1 PE=1 SV=1	2966	3	1218.14	1138.53	1222.63	1223.26	1096.51	1120.52	1112.62	1092.81	1137.3	1142.38	1113.77	1007.43	1121.08	1108.07	1194.96	1103.89	-0.152803	1.14791	0.227229		-0.0806069	0.81542	0.340735		-0.112793	1.79721	0.0388423	+	-0.0945768	1.47556	0.28084
sp|Q8N2F6|ARM10_HUMAN	ARMC10	Armadillo repeat-containing protein 10 OS=Homo sapiens OX=9606 GN=ARMC10 PE=1 SV=1	2347	3	68.5585	78.5014	76.2159	61.8573	55.4475	65.7226	75.4668	72.5018	80.6137	76.649	67.3882	69.8072	87.0057	84.4051	65.6624	67.9462	0.0650548	0.176133	0.831097		0.024991	0.0627819	0.93238		-0.126154	0.34074	0.59186		0.108497	0.542507	0.681674
tr|J3KQ26|J3KQ26_HUMAN	ARMC5	Armadillo repeat-containing protein 5 OS=Homo sapiens OX=9606 GN=ARMC5 PE=1 SV=1	4931	2	58.9107	59.3508	63.2036	53.5213	61.4769	63.6326	58.0034	60.4325	55.8824	63.2594	56.6058	44.8886	61.8818	64.3168	59.8015	58.0929	-0.119708	0.314855	0.705698		0.0492671	0.310477	0.687274		0.05667	0.387498	0.544364		0.0276869	0.144328	0.928247
sp|Q6NXE6|ARMC6_HUMAN	ARMC6	Armadillo repeat-containing protein 6 OS=Homo sapiens OX=9606 GN=ARMC6 PE=1 SV=2	748	4	661.021	688.324	690.615	660.838	603.111	575.922	641.052	642.074	623.825	659.538	646.055	593.027	599.537	630.956	675.581	628.41	-0.140456	1.30106	0.180839		-0.0665324	0.75085	0.375741		-0.155411	1.23613	0.105203		-0.0732117	1.18892	0.375816
sp|Q8IUR7|ARMC8_HUMAN	ARMC8	Armadillo repeat-containing protein 8 OS=Homo sapiens OX=9606 GN=ARMC8 PE=1 SV=2	2719	10	299.28	331.081	312.752	310.312	337.587	313.912	316.29	284.568	312.019	315.32	370.791	358.117	339.203	314.577	339.698	345.73	0.184207	1.78137	0.100508		0.0889159	0.79248	0.352329		0.0421012	0.402979	0.52726		-0.0444467	0.322769	0.82076
sp|Q9UH62|ARMX3_HUMAN	ARMCX3	Armadillo repeat-containing X-linked protein 3 OS=Homo sapiens OX=9606 GN=ARMCX3 PE=1 SV=1	2349	8	594.541	623.874	608.703	594.164	559.153	632.66	648.511	645.795	624.055	633.367	588.577	673.46	695.637	647.37	616.01	659.073	0.104978	0.539194	0.518736		0.0819198	1.0701	0.24375		0.0165271	0.0815124	0.904221		0.067856	1.56192	0.25081
sp|Q5T2E6|ARMD3_HUMAN	ARMH3	Armadillo-like helical domain-containing protein 3 OS=Homo sapiens OX=9606 GN=ARMH3 PE=1 SV=1	5594	2	377.865	385.644	394.145	383.725	414.128	399.602	410.944	390.371	395.06	367.314	427.023	399.343	387.483	395.351	424.005	398.651	0.0693735	0.637126	0.450536		0.0747956	0.888258	0.309584		0.0832091	1.89635	0.0340532	+	-0.00467443	0.0442852	0.97966
sp|Q9H993|ARMT1_HUMAN	ARMT1	Damage-control phosphatase ARMT1 OS=Homo sapiens OX=9606 GN=ARMT1 PE=1 SV=1	1894	5	2124.04	2100.8	1993.34	2233.95	2110.15	2100.68	1904.21	2158.13	1973.14	2167.8	2130.81	2075.4	2038.95	2095.97	2100.99	2143.81	-0.0205943	0.209183	0.805168		0.00148789	0.0138493	0.983685		-0.0523354	0.369617	0.563132		-0.009298	0.0579178	0.972314
sp|P27540|ARNT_HUMAN	ARNT	Aryl hydrocarbon receptor nuclear translocator OS=Homo sapiens OX=9606 GN=ARNT PE=1 SV=1	3628	4	224.586	222.543	225.91	247.259	230.498	219.728	231.113	218.268	219.772	222.693	232.394	240.23	212.973	209.371	243.704	243.997	-0.0102276	0.0560664	0.948822		0.0119042	0.0490534	0.945224		-0.017757	0.158404	0.804897		-0.061726	0.747497	0.568619
sp|Q8WYA1|BMAL2_HUMAN	ARNTL2	Aryl hydrocarbon receptor nuclear translocator-like protein 2 OS=Homo sapiens OX=9606 GN=ARNTL2 PE=1 SV=2	5488	1	128.582	141.02	144.079	133.057	242.823	243.451	240.415	120.565	124.306	141.787	175.649	175.46	168.655	162.973	161.986	153.872	0.343264	3.04783	0.0269057	+	0.224704	2.31862	0.0597308		0.826981	3.7885	0.00118605	+	-0.0868958	0.443632	0.73911
sp|Q92747|ARC1A_HUMAN	ARPC1A	Actin-related protein 2/3 complex subunit 1A OS=Homo sapiens OX=9606 GN=ARPC1A PE=2 SV=2	3219	5	160.046	161.667	166.698	174.303	157.335	160.19	170.094	173.157	157.265	170.734	192.458	193.187	168.387	169.024	161.069	177.217	0.154521	0.899362	0.31228		0.0292215	0.236157	0.753896		-0.0276012	0.251041	0.692807		0.0114231	0.0776897	0.961478
sp|O15143|ARC1B_HUMAN	ARPC1B	Actin-related protein 2/3 complex subunit 1B OS=Homo sapiens OX=9606 GN=ARPC1B PE=1 SV=3	3219	8	459.947	459.942	495.744	501.858	536.567	481.336	482.574	479.487	488.32	497.413	521.633	492.034	496.989	491.545	489.321	478.619	0.0717205	0.810422	0.351646		0.022379	0.243951	0.745424		0.0605691	0.411779	0.518807		0.0279724	0.306681	0.833139
sp|O15144|ARPC2_HUMAN	ARPC2	Actin-related protein 2/3 complex subunit 2 OS=Homo sapiens OX=9606 GN=ARPC2 PE=1 SV=1	3072	16	2143.82	2317.48	2055.9	2059.87	2507.71	2287.65	2348.89	2172.7	2170.42	2113.7	2366.01	2537.45	2361.98	2480.23	2393.12	2432.58	0.176511	1.68658	0.113046		0.185185	1.84198	0.104328		0.151973	1.35134	0.0846633		0.00697857	0.0563956	0.972395
sp|O15145|ARPC3_HUMAN	ARPC3	Actin-related protein 2/3 complex subunit 3 OS=Homo sapiens OX=9606 GN=ARPC3 PE=1 SV=3	3672	6	2510.54	2476.57	2419.09	2442.14	2590.38	2497.34	2524.39	2356.1	2412.1	2449.14	2593.46	2547.84	2577.61	2522.97	2591.21	2506.7	0.0636577	2.17295	0.0688571		0.0451082	1.15204	0.218727		0.0434257	1.04526	0.149653		-0.0334159	0.764005	0.559109
sp|P59998-3|ARPC4_HUMAN	ARPC4	Isoform 3 of Actin-related protein 2/3 complex subunit 4 OS=Homo sapiens OX=9606 GN=ARPC4	1253	3	387.508	362.737	354.666	361.321	388.871	386.756	386.926	344.727	379.018	340.316	399.845	370.359	404.301	402.672	393.865	364.743	0.0947086	0.899199	0.312264		0.0781725	0.675267	0.419403		0.0810346	1.20946	0.110816		-0.0483578	0.347508	0.803892
sp|O15511|ARPC5_HUMAN	ARPC5	Actin-related protein 2/3 complex subunit 5 OS=Homo sapiens OX=9606 GN=ARPC5 PE=1 SV=3	2146	4	121.396	103.029	117.179	125.861	120.363	112.815	124.683	103.625	103.337	97.4374	132.195	116.499	109.355	123.052	117.219	121.486	0.029839	0.105621	0.898563		0.0489257	0.296491	0.698439		0.032376	0.162736	0.799156		-0.200404	1.36955	0.309573
sp|Q9BPX5|ARP5L_HUMAN	ARPC5L	Actin-related protein 2/3 complex subunit 5-like protein OS=Homo sapiens OX=9606 GN=ARPC5L PE=1 SV=1	2183	4	309.048	281.941	321.141	340.738	299.311	303.129	305.312	323.168	303.032	332.206	327.462	303.363	303.268	301.964	324.479	328.223	-0.00611817	0.030539	0.969034		0.0252859	0.137862	0.853274		-0.0464863	0.319888	0.612377		0.0308374	0.169905	0.911087
sp|Q7Z6K5-2|ARPIN_HUMAN	ARPIN	Isoform C15orf38-AP3S2 of Arpin OS=Homo sapiens OX=9606 GN=ARPIN	7951	3	336.907	316.739	345.462	323.284	358.263	310.758	320.371	358.689	329.696	353.791	341.684	346.165	337.083	358.043	328.504	323.599	0.0481653	0.718745	0.398167		0.0258401	0.181734	0.803416		-0.00539213	0.0257168	0.968849		0.0713455	0.690578	0.601906
tr|H3BMD8|H3BMD8_HUMAN	ARPP19	cAMP-regulated phosphoprotein 19 OS=Homo sapiens OX=9606 GN=ARPP19 PE=1 SV=1	7299	1	115.746	100.926	96.9172	98.7523	87.3902	95.4204	89.2987	94.5462	72.5843	94.8839	103.239	90.8508	75.0948	101.78	98.1233	106.078	-0.208795	0.594957	0.47794		-0.0124937	0.0658265	0.929997		-0.182035	1.30866	0.0919947		-0.246557	0.737104	0.574209
sp|P49407-2|ARRB1_HUMAN	ARRB1	Isoform 1B of Beta-arrestin-1 OS=Homo sapiens OX=9606 GN=ARRB1	697	10	1032.11	1044.35	999.759	1029.71	1043.94	1018.88	1047.95	1073.2	1054.71	1039.75	1072.96	963.666	1048.18	1131.25	1078.51	1057.03	0.00117283	0.00754475	0.992918		0.0848015	1.09175	0.23677		0.0146745	0.334007	0.597874		0.0408109	1.07511	0.426302
sp|P32121-4|ARRB2_HUMAN	ARRB2	Isoform 4 of Beta-arrestin-2 OS=Homo sapiens OX=9606 GN=ARRB2	697	3	382.944	372.205	380.134	362.612	381.142	367.178	369.201	379.762	384.863	372.863	386.19	390.53	386.829	377.603	403.902	409.137	0.0509386	1.23079	0.200053		0.0832784	0.887406	0.309897		-0.00746987	0.112501	0.864298		0.0181539	0.348186	0.80372
sp|Q8N5I2|ARRD1_HUMAN	ARRDC1	Arrestin domain-containing protein 1 OS=Homo sapiens OX=9606 GN=ARRDC1 PE=1 SV=1	5154	1	33.6806	33.2824	30.7124	26.3603	37.046	34.8061	34.7579	39.0483	28.9037	31.3061	29.9654	29.2045	32.6416	31.2218	31.1905	38.5347	-0.0138997	0.0508179	0.951805		0.117306	0.381436	0.629177		0.2027	1.07681	0.141874		0.0883529	0.222549	0.881381
sp|Q96B67|ARRD3_HUMAN	ARRDC3	Arrestin domain-containing protein 3 OS=Homo sapiens OX=9606 GN=ARRDC3 PE=1 SV=1	330	3	42.7303	56.1258	48.9837	54.9797	82.7052	78.0522	73.769	138.473	134.805	135.379	51.3285	40.4012	54.8483	49.5893	48.1638	47.9227	-0.057246	0.129384	0.877007		-0.0542186	0.226085	0.762498		0.631363	2.59119	0.0109639	+	1.43397	3.3357	0.0154286	+
tr|A0A0C4DFZ2|A0A0C4DFZ2_HUMAN	ARSA	Arylsulfatase A OS=Homo sapiens OX=9606 GN=ARSA PE=1 SV=1	6933	1	5.35233	10.3836	8.72823	7.60698	13.6862	11.884	10.6065	9.72184	8.10535	8.83567	15.3201	10.8685	12.3191	10.8024	12.6617	10.3499	0.705066	1.42812	0.152641		0.526721	1.12282	0.22636		0.621805	1.31647	0.090566		0.185461	0.354258	0.799638
sp|P15848|ARSB_HUMAN	ARSB	Arylsulfatase B OS=Homo sapiens OX=9606 GN=ARSB PE=1 SV=1	7090	1	17.4398	12.9491	14.9239	13.8142	15.5143	15.5337	14.1031	12.8515	12.0405	13.0386	9.01914	11.4636	11.5066	14.4233	11.5512	11.4532	-0.471225	1.50212	0.139106		-0.244021	0.805921	0.344955		0.0335845	0.11882	0.855718		-0.217213	1.01467	0.449826
sp|P51689|ARSD_HUMAN	ARSD	Arylsulfatase D OS=Homo sapiens OX=9606 GN=ARSD PE=1 SV=2	4572	2	83.9329	104.429	100.267	105.205	85.8375	92.0048	94.0511	94.8798	106.759	86.1414	98.6504	111.355	91.0887	93.8929	112.803	102.824	0.0285822	0.0902267	0.914607		0.0693033	0.259224	0.731966		-0.114728	0.60585	0.344893		-0.0372838	0.115913	0.942771
tr|F5GYY5|F5GYY5_HUMAN	ARSL	Arylsulfatase L OS=Homo sapiens OX=9606 GN=ARSL PE=1 SV=1	6929	1	14.466	21.5624	12.3818	15.0549	16.1059	9.99133	15.5547	17.3951	16.9405	16.5589	20.5582	20.7818	17.383	13.7117	17.033	18.3435	0.329328	0.81989	0.346989		0.0647601	0.112778	0.880389		-0.19368	0.279942	0.656346		0.127345	0.294352	0.836718
sp|Q9H2C2|ARV1_HUMAN	ARV1	Protein ARV1 OS=Homo sapiens OX=9606 GN=ARV1 PE=1 SV=1	6777	1	13.433	9.56245	12.6326	12.6065	6.13876	10.584	9.41167	14.9941	11.9386	16.0895	14.028	16.7089	11.0077	8.58905	11.057	10.1021	0.197675	0.399381	0.633006		-0.278076	0.884496	0.311251		-0.494663	0.792664	0.240396		0.250578	0.68107	0.605835
sp|Q9HBK9|AS3MT_HUMAN	AS3MT	Arsenite methyltransferase OS=Homo sapiens OX=9606 GN=AS3MT PE=1 SV=3	4141	3	94.9995	98.759	96.6686	93.4035	100.407	79.504	87.8018	92.0488	95.8741	98.5137	87.6147	87.8328	88.8481	111.639	101.118	98.4249	-0.122998	2.48747	0.0467884	+	0.110498	0.7567	0.37198		-0.111067	0.42836	0.502201		-0.00746755	0.0782591	0.961153
sp|Q13510-2|ASAH1_HUMAN	ASAH1	Isoform 2 of Acid ceramidase OS=Homo sapiens OX=9606 GN=ASAH1	7003	5	825.189	860.237	834.839	864.781	871.481	843.334	908.047	584.566	573.977	593.476	1105.32	1198.38	1076.42	1039.21	1054.94	1121.16	0.411702	2.16138	0.0702727		0.340319	2.53554	0.0480538	+	0.0466239	0.56685	0.374839		-0.534973	5.69797	0	+
sp|Q9ULH1-2|ASAP1_HUMAN	ASAP1	Isoform 1 of Arf-GAP with SH3 domain, ANK repeat and PH domain-containing protein 1 OS=Homo sapiens OX=9606 GN=ASAP1	2025	9	1021.18	1015.4	1024.27	1036.86	1165.82	1156.33	1184.33	979.395	962.268	1005.25	1107.17	1099.01	1018.6	1034.77	1076.71	1044.98	0.0684473	0.668645	0.429777		0.0383628	0.842029	0.327383		0.190214	3.6824	0.00188482	+	-0.0607664	1.17634	0.381555
sp|O43150-2|ASAP2_HUMAN	ASAP2	Isoform 2 of Arf-GAP with SH3 domain, ANK repeat and PH domain-containing protein 2 OS=Homo sapiens OX=9606 GN=ASAP2	2025	8	615.997	589.091	622.211	614.039	650.608	674.938	669.199	592.619	613.349	596.375	728.457	685.812	668.122	650.605	702.857	701.388	0.184969	1.6624	0.115524		0.165788	1.5504	0.140256		0.123706	2.45353	0.0132224	+	-0.0226094	0.427516	0.750194
sp|Q9Y576|ASB1_HUMAN	ASB1	Ankyrin repeat and SOCS box protein 1 OS=Homo sapiens OX=9606 GN=ASB1 PE=1 SV=1	1774	3	190.798	185.35	199.684	176.614	159.105	194.786	180.618	167.306	176.259	186.343	204.138	190.67	192.442	192.938	191.935	189.689	0.0581946	0.549689	0.511929		0.0273096	0.284505	0.709877		-0.0818839	0.348725	0.583551		-0.0907719	0.723638	0.579913
sp|Q8WXK3|ASB13_HUMAN	ASB13	Ankyrin repeat and SOCS box protein 13 OS=Homo sapiens OX=9606 GN=ASB13 PE=1 SV=2	7398	1	23.7528	25.5796	29.5125	34.9681	16.07	17.8319	19.7727	29.175	26.2651	28.5806	28.8932	28.609	29.1427	20.7842	24.7865	31.1287	0.0374969	0.107487	0.897683		-0.158185	0.308587	0.689007		-0.658501	2.12534	0.0233431	+	-0.00830894	0.0209975	0.990593
sp|Q9NWX5|ASB6_HUMAN	ASB6	Ankyrin repeat and SOCS box protein 6 OS=Homo sapiens OX=9606 GN=ASB6 PE=1 SV=1	7502	2	67.6708	79.0818	78.8607	75.8166	66.2653	66.4482	73.901	66.8046	65.6462	66.0813	73.2896	77.4541	58.5079	63.5939	68.8482	68.1149	-0.119064	0.349631	0.674958		-0.170832	1.34625	0.176072		-0.128899	0.843231	0.218968		-0.184625	1.4207	0.297514
sp|Q9H765|ASB8_HUMAN	ASB8	Ankyrin repeat and SOCS box protein 8 OS=Homo sapiens OX=9606 GN=ASB8 PE=2 SV=1	5444	1	54.6042	50.9336	50.3732	50.3771	63.5867	56.9876	60.4154	49.6582	52.6632	54.343	59.4094	51.3286	49.1611	63.4324	63.5168	63.7404	0.0435603	0.18126	0.827318		0.302425	2.78798	0.0425278	+	0.225666	1.7369	0.0440464	+	0.0178769	0.139787	0.930734
sp|Q96DX5|ASB9_HUMAN	ASB9	Ankyrin repeat and SOCS box protein 9 OS=Homo sapiens OX=9606 GN=ASB9 PE=1 SV=1	3816	3	174.92	183.962	166.927	191.083	176.343	151.515	167.795	164.33	183.561	183.86	204.077	164.182	148.195	172.505	171.126	158.59	-0.0692445	0.175154	0.831932		-0.097547	0.820904	0.337737		-0.118365	0.685074	0.295487		-0.0160589	0.0833043	0.958533
tr|A0A5F9ZHP1|A0A5F9ZHP1_HUMAN	ASCC1	Activating signal cointegrator 1 complex subunit 1 OS=Homo sapiens OX=9606 GN=ASCC1 PE=4 SV=1	6431	5	314.534	293.398	307.393	304.312	290.798	304.863	321.813	281.617	291.627	297.901	301.397	300.557	308.19	302.725	302.298	295.099	-0.00688639	0.104883	0.899209		-0.0228682	0.409337	0.603234		0.00353942	0.0246213	0.970342		-0.0703637	1.08638	0.419971
sp|Q9H1I8|ASCC2_HUMAN	ASCC2	Activating signal cointegrator 1 complex subunit 2 OS=Homo sapiens OX=9606 GN=ASCC2 PE=1 SV=3	4899	4	443.286	444.861	477.194	457.132	449.622	440.969	441.223	440.464	449.06	455.41	454.715	465.263	461.312	432.346	458.719	453.5	0.0157225	0.233327	0.779809		-0.0235616	0.265712	0.725927		-0.0368955	0.627372	0.329751		-0.0228287	0.338098	0.811081
sp|Q8N3C0|ASCC3_HUMAN	ASCC3	Activating signal cointegrator 1 complex subunit 3 OS=Homo sapiens OX=9606 GN=ASCC3 PE=1 SV=3	1646	16	1575.83	1597.16	1572.54	1594.89	1607.83	1534.25	1585.23	1537.52	1561.89	1585.04	1633.6	1583.48	1583.62	1593.03	1665.13	1638.55	0.0135829	0.329857	0.6931		0.0420657	0.844186	0.32624		-0.00876338	0.149007	0.816859		-0.0217379	0.654019	0.620405
sp|Q9Y294|ASF1A_HUMAN	ASF1A	Histone chaperone ASF1A OS=Homo sapiens OX=9606 GN=ASF1A PE=1 SV=1	5948	1	42.1683	50.4155	58.0859	53.2154	48.2533	40.1552	46.8677	52.7446	50.6034	53.5355	52.3169	54.1888	40.9407	48.779	53.1296	52.4265	-0.0537453	0.122713	0.882726		0.0220096	0.0735506	0.923078		-0.171745	0.627011	0.329931		0.0462367	0.171621	0.910532
sp|Q9NVP2|ASF1B_HUMAN	ASF1B	Histone chaperone ASF1B OS=Homo sapiens OX=9606 GN=ASF1B PE=1 SV=1	6344	3	218.719	215.898	223.225	222.816	219.336	225.185	215.279	208.831	206.774	206.927	222.574	220.704	216.478	220.495	225.816	221.898	-0.00157217	0.032442	0.967486		0.0168185	0.487495	0.539918		-0.00162461	0.0244108	0.970372		-0.0852741	2.58935	0.0632547
sp|Q9NR48|ASH1L_HUMAN	ASH1L	Histone-lysine N-methyltransferase ASH1L OS=Homo sapiens OX=9606 GN=ASH1L PE=1 SV=2	1046	8	515.228	552.112	551.303	568.816	407.305	428.202	444.2	558.308	529.404	571.129	522.727	528.4	495.128	501.613	500.142	517.769	-0.0850816	1.00233	0.273929		-0.109838	1.54809	0.140422		-0.358375	2.93892	0.00659361	+	0.0161708	0.13598	0.933099
sp|Q9UBL3|ASH2L_HUMAN	ASH2L	Set1/Ash2 histone methyltransferase complex subunit ASH2 OS=Homo sapiens OX=9606 GN=ASH2L PE=1 SV=1	4685	8	605.963	609.317	604.409	595.271	622.079	606.215	635.666	614.711	578.589	591.698	603.246	580.568	602.85	630.886	591.411	580.175	-0.0198701	0.402764	0.630165		-0.00786403	0.0699838	0.926206		0.0411918	0.790658	0.241302		-0.0214375	0.307065	0.83302
sp|P04424|ARLY_HUMAN	ASL	Argininosuccinate lyase OS=Homo sapiens OX=9606 GN=ASL PE=1 SV=4	1034	12	1092.32	1191.17	1124	1127.86	1158.37	1184.86	1171.85	1092.3	1078.59	1107.12	1429.65	1418.65	1363.19	1223.98	1326.42	1292.87	0.308555	3.58565	0.0132364	+	0.176064	1.844	0.104191		0.0480324	0.786448	0.243036		-0.0527255	0.864844	0.514997
sp|O95671|ASML_HUMAN	ASMTL	Probable bifunctional dTTP/UTP pyrophosphatase/methyltransferase protein OS=Homo sapiens OX=9606 GN=ASMTL PE=1 SV=3	1038	4	289.669	288.499	298.679	294.226	256.923	264.727	270.99	283.107	273.506	287.731	286.72	289.98	264.702	275.552	267.1	282.6	-0.0629681	0.577834	0.490327		-0.0901344	1.37403	0.168732		-0.148263	2.03897	0.0272366	+	-0.0570762	1.00828	0.451925
sp|O43681|ASNA_HUMAN	ASNA1	ATPase ASNA1 OS=Homo sapiens OX=9606 GN=ASNA1 PE=1 SV=2	6124	4	235.848	235.951	210.374	222.095	252.005	243.377	243.219	234.349	250.098	208.462	229.12	227.017	227.253	223.493	248.382	224.046	0.0126149	0.112057	0.892998		0.0370756	0.227513	0.760731		0.124514	1.34615	0.085448		0.028526	0.117534	0.941275
sp|P08243|ASNS_HUMAN	ASNS	Asparagine synthetase [glutamine-hydrolyzing] OS=Homo sapiens OX=9606 GN=ASNS PE=1 SV=4	2664	3	190.185	194.845	198.154	188.846	198.031	204.477	190.621	182.336	196.898	185.909	171.944	159.991	186.411	153.67	155.165	172.952	-0.162252	0.928177	0.300113		-0.267054	1.50792	0.146991		0.0343999	0.426969	0.50307		-0.0355092	0.388542	0.775345
sp|Q9NWL6|ASND1_HUMAN	ASNSD1	Asparagine synthetase domain-containing protein 1 OS=Homo sapiens OX=9606 GN=ASNSD1 PE=2 SV=2	4447	2	36.2765	27.7481	29.7597	31.2351	18.0642	18.3035	20.3134	30.1641	27.9376	21.3667	22.9072	23.8967	24.1731	29.0406	31.4061	26.9507	-0.394983	1.86885	0.0904896		-0.0971751	0.406591	0.605743		-0.721093	3.06449	0.005728	+	-0.246853	0.617579	0.639278
sp|Q12797|ASPH_HUMAN	ASPH	Aspartyl/asparaginyl beta-hydroxylase OS=Homo sapiens OX=9606 GN=ASPH PE=1 SV=3	1209	14	1013.36	1057.5	1041.78	1040.69	1140.82	1288.94	1200	1077.62	1077.52	1093.15	1057.02	1135.65	1157.86	1036	1075.75	1103.37	0.104228	0.960178	0.289788		0.045329	0.653942	0.430844		0.218998	1.36428	0.083257		0.060586	1.947	0.1487
sp|Q5U4P2|ASPH1_HUMAN	ASPHD1	Aspartate beta-hydroxylase domain-containing protein 1 OS=Homo sapiens OX=9606 GN=ASPHD1 PE=1 SV=3	3854	2	54.386	51.9642	59.2059	63.5088	38.6328	48.366	39.1034	63.2434	66.9383	74.8605	53.0667	63.4253	59.2621	52.3384	57.5151	61.3065	0.0332956	0.124078	0.881793		-0.0040792	0.0147625	0.982726		-0.449658	1.55064	0.0601866		0.255954	1.30806	0.325662
sp|Q8IZT6|ASPM_HUMAN	ASPM	Abnormal spindle-like microcephaly-associated protein OS=Homo sapiens OX=9606 GN=ASPM PE=1 SV=2	575	7	191.927	210.553	212.492	215.415	178.634	168.284	171.75	209.33	211.493	197.624	222.012	210.913	217.123	216.405	238.195	229.956	0.062949	0.670938	0.428965		0.136761	1.22042	0.203251		-0.262912	2.61057	0.0107023	+	-0.00926807	0.0674129	0.964399
sp|Q9BZE9-2|ASPC1_HUMAN	ASPSCR1	Isoform 2 of Tether containing UBX domain for GLUT4 OS=Homo sapiens OX=9606 GN=ASPSCR1	286	4	149.674	142.92	175.745	172.676	146.371	150.554	140.289	140.469	154.005	149.607	151.389	125.93	133.479	122.504	136.638	123.162	-0.225481	1.02288	0.268354		-0.326731	1.79944	0.107213		-0.131875	0.753171	0.257985		-0.109843	0.593354	0.652468
sp|P00966|ASSY_HUMAN	ASS1	Argininosuccinate synthase OS=Homo sapiens OX=9606 GN=ASS1 PE=1 SV=2	5415	1	129.158	128.046	143.948	128.791	135.073	121.76	127.281	132.212	137.165	121.762	189.611	166.212	174.883	142.994	169.707	161.719	0.416724	2.41802	0.0527424		0.253402	1.28136	0.189066		-0.0488291	0.345857	0.586562		-0.0231515	0.131439	0.934519
sp|Q8IXJ9|ASXL1_HUMAN	ASXL1	Polycomb group protein ASXL1 OS=Homo sapiens OX=9606 GN=ASXL1 PE=1 SV=4	5543	1	31.0023	27.7877	24.4592	28.7967	21.369	20.4754	26.4396	28.6139	25.4323	22.3666	26.9337	33.7695	29.1756	24.555	31.3505	29.4743	0.0958563	0.331133	0.691945		0.0205453	0.0552574	0.940561		-0.303405	1.01576	0.158864		-0.139201	0.480338	0.718238
sp|Q76L83|ASXL2_HUMAN	ASXL2	Putative Polycomb group protein ASXL2 OS=Homo sapiens OX=9606 GN=ASXL2 PE=1 SV=1	4406	3	370.429	357.88	340.172	372.369	334.958	316.835	332.891	383.452	352.835	386.617	333.516	357.958	365.427	344.034	371.48	350.352	-0.0322077	0.256607	0.757297		-0.019704	0.166883	0.820064		-0.133664	1.71403	0.0457828	+	0.055064	0.457269	0.730168
sp|Q8NBU5|ATAD1_HUMAN	ATAD1	ATPase family AAA domain-containing protein 1 OS=Homo sapiens OX=9606 GN=ATAD1 PE=1 SV=1	4190	5	738.159	815.032	749.833	749.487	597.563	741.037	742.949	759.156	727.886	782.291	697.184	794.89	826.358	733.993	698.789	713.998	0.0155386	0.0649889	0.940602		-0.0919675	1.18908	0.210417		-0.143515	0.522794	0.408055		-0.0122105	0.100169	0.951727
sp|Q6PL18|ATAD2_HUMAN	ATAD2	ATPase family AAA domain-containing protein 2 OS=Homo sapiens OX=9606 GN=ATAD2 PE=1 SV=1	533	9	625.297	657.098	643.204	612.287	509.321	526.811	540.616	680.804	624.783	651.249	567.196	531.976	578.606	609.748	556.578	557.853	-0.182437	1.74888	0.104709		-0.143473	1.23013	0.200847		-0.271545	3.14784	0.00517365	+	0.0395677	0.38901	0.774994
sp|Q9ULI0|ATD2B_HUMAN	ATAD2B	ATPase family AAA domain-containing protein 2B OS=Homo sapiens OX=9606 GN=ATAD2B PE=1 SV=3	533	3	88.0084	92.2195	92.2334	96.1656	83.522	84.8978	84.2608	98.2478	83.9022	90.9285	88.4199	87.3289	77.2522	81.3319	84.0429	91.0195	-0.129912	0.797726	0.358615		-0.109673	0.871239	0.315585		-0.129132	1.88591	0.0342233	+	-0.020092	0.0984337	0.952724
sp|Q9NVI7-2|ATD3A_HUMAN	ATAD3A	Isoform 2 of ATPase family AAA domain-containing protein 3A OS=Homo sapiens OX=9606 GN=ATAD3A	3338	5	103.332	124.856	112.482	114.683	78.8966	103.044	105.746	114.525	119.013	123.162	105.963	114.614	132.487	106.194	103.816	136.399	0.0450071	0.15093	0.855016		0.0124635	0.0295875	0.968256		-0.256425	0.725685	0.271458		0.0653885	0.447158	0.735771
sp|Q5T9A4|ATD3B_HUMAN	ATAD3B	ATPase family AAA domain-containing protein 3B OS=Homo sapiens OX=9606 GN=ATAD3B PE=1 SV=1	3338	7	1066.59	1120.79	1008.37	1015.05	757.866	1023.91	944.536	1063.51	1071.51	1079.97	937.343	1077.1	1186.06	1082.91	983.941	1072.97	0.0138849	0.0436459	0.95686		-0.00838548	0.0511234	0.942958		-0.222181	0.650121	0.315778		0.0270489	0.296729	0.836818
sp|Q96QE3|ATAD5_HUMAN	ATAD5	ATPase family AAA domain-containing protein 5 OS=Homo sapiens OX=9606 GN=ATAD5 PE=1 SV=4	4335	1	43.4074	39.7262	44.4913	39.1601	47.1853	41.7593	40.7544	44.4102	32.1651	37.8025	43.4151	49.7354	43.3453	39.6557	44.9849	40.967	0.125047	0.705343	0.406161		0.00607554	0.0288257	0.96904		0.0513954	0.254702	0.688238		-0.139445	0.384985	0.777976
sp|Q5SQI0|ATAT_HUMAN	ATAT1	Alpha-tubulin N-acetyltransferase 1 OS=Homo sapiens OX=9606 GN=ATAT1 PE=1 SV=1	85	1	38.8346	32.7505	41.708	38.5646	35.4584	28.0445	32.4474	34.1413	38.8291	35.9791	25.4162	19.4132	32.5273	35.1609	34.161	28.9694	-0.584303	0.999733	0.27463		-0.212164	0.885919	0.310578		-0.248466	0.945138	0.18057		-0.0605101	0.26975	0.853798
sp|O95260-2|ATE1_HUMAN	ATE1	Isoform ATE1-2 of Arginyl-tRNA--protein transferase 1 OS=Homo sapiens OX=9606 GN=ATE1	2054	2	513.537	471.561	489.449	482.068	507.326	485.301	487.213	534.947	471.595	514.477	505.33	488.961	472.346	479.229	466.28	516.842	-0.000647217	0.00557912	0.994725		-0.00569861	0.0370648	0.959745		0.0125382	0.14219	0.823244		0.05044	0.33575	0.812565
sp|O95260|ATE1_HUMAN	ATE1	Arginyl-tRNA--protein transferase 1 OS=Homo sapiens OX=9606 GN=ATE1 PE=1 SV=2	2054	1	397.472	424.864	419.851	411.523	457.522	426.318	445.255	404.999	405.742	401.998	449.822	441.598	405.254	396.686	425.416	432.982	0.0631286	0.511352	0.542097		0.0165501	0.136591	0.854738		0.0996248	1.26772	0.098554		-0.0319531	0.64463	0.625175
sp|P18846|ATF1_HUMAN	ATF1	Cyclic AMP-dependent transcription factor ATF-1 OS=Homo sapiens OX=9606 GN=ATF1 PE=1 SV=2	1882	2	235.948	269.959	243.584	246.499	230.773	231.419	237.141	241.42	247.948	245.514	252.573	283.338	246.436	287.682	239.231	253.661	0.0658433	0.364827	0.664808		0.0609578	0.267406	0.724313		-0.0933937	0.96805	0.173198		-0.0218399	0.191381	0.900617
sp|P15336|ATF2_HUMAN	ATF2	Cyclic AMP-dependent transcription factor ATF-2 OS=Homo sapiens OX=9606 GN=ATF2 PE=1 SV=4	34	3	91.3046	91.9812	97.2034	101.365	89.0111	80.6959	82.0801	95.5213	105.63	106.514	92.6173	93.8872	82.3594	90.1386	87.3449	100.418	-0.092249	0.571213	0.495653		-0.0446921	0.246281	0.742736		-0.185793	1.56739	0.0585465		0.10295	0.760152	0.560721
sp|P18850|ATF6A_HUMAN	ATF6	Cyclic AMP-dependent transcription factor ATF-6 alpha OS=Homo sapiens OX=9606 GN=ATF6 PE=1 SV=3	1284	3	47.82	63.4046	67.5309	59.2545	42.9145	35.9165	47.2141	56.4001	58.0688	53.8331	54.7332	58.8201	57.9717	64.6781	56.0095	49.6719	-0.0464771	0.152224	0.854936		-0.0640423	0.157194	0.831218		-0.499392	1.55455	0.059742		-0.0738504	0.257043	0.862363
sp|Q99941|ATF6B_HUMAN	ATF6B	Cyclic AMP-dependent transcription factor ATF-6 beta OS=Homo sapiens OX=9606 GN=ATF6B PE=1 SV=2	7290	3	41.5935	46.2271	42.6777	47.6527	33.9102	34.292	33.5861	41.3423	46.3318	52.237	46.0346	45.8809	38.9886	37.2645	36.7614	48.7376	-0.0315628	0.12421	0.881805		-0.132441	0.369065	0.640657		-0.390299	2.53922	0.0118056	+	0.0621135	0.21723	0.884373
sp|P17544-6|ATF7_HUMAN	ATF7	Isoform 6 of Cyclic AMP-dependent transcription factor ATF-7 OS=Homo sapiens OX=9606 GN=ATF7	34	4	211.162	220.141	226.968	206.507	227.611	214.372	243.309	218.331	229.89	227.221	202.23	209.958	226.497	205.97	193.152	217.946	-0.0228345	0.147962	0.858596		-0.0726506	0.530525	0.508844		0.078461	0.552213	0.38505		0.0591546	0.745525	0.569576
sp|Q6VMQ6-5|MCAF1_HUMAN	ATF7IP	Isoform 4 of Activating transcription factor 7-interacting protein 1 OS=Homo sapiens OX=9606 GN=ATF7IP	926	3	156.866	154.508	163.984	158.161	102.606	102.703	102.677	162.642	150.85	164.97	144.211	133.399	120.606	141.165	141.073	145.447	-0.258297	1.17523	0.216893		-0.151601	2.89073	0.0368855	+	-0.625139	4.26666	0.000367347	+	0.00929865	0.0721556	0.963989
sp|Q5U623|MCAF2_HUMAN	ATF7IP2	Activating transcription factor 7-interacting protein 2 OS=Homo sapiens OX=9606 GN=ATF7IP2 PE=1 SV=2	8202	1	14.3884	11.5724	14.5053	15.7188	13.5299	9.62723	11.5063	14.9108	15.1531	15.2456	12.7605	13.7179	11.1389	9.84406	12.7869	12.4835	-0.160049	0.566125	0.499125		-0.263828	0.803797	0.346469		-0.286577	0.759487	0.254551		0.113622	0.499491	0.708413
sp|Q9BSB4|ATGA1_HUMAN	ATG101	Autophagy-related protein 101 OS=Homo sapiens OX=9606 GN=ATG101 PE=1 SV=1	7130	1	15.2807	14.9503	11.5805	14.7612	14.2845	13.7546	12.6973	13.205	15.3995	18.2572	14.6408	15.7981	13.7408	16.4383	13.8712	12.2142	0.0647224	0.23316	0.779726		0.00122296	0.00257023	0.995707		-0.0517193	0.187205	0.768723		0.139463	0.350451	0.803331
sp|O94817|ATG12_HUMAN	ATG12	Ubiquitin-like protein ATG12 OS=Homo sapiens OX=9606 GN=ATG12 PE=1 SV=1	3461	2	345.936	372.768	344.592	343.194	408.925	371.886	387.51	374.181	344.708	345.611	362.328	356.664	335.794	362.88	379.823	340.909	-2.80713e-05	0.000209452	0.999695		0.038228	0.285138	0.709122		0.147136	1.39062	0.0796205		0.0129126	0.0958477	0.955138
sp|O75143-5|ATG13_HUMAN	ATG13	Isoform 5 of Autophagy-related protein 13 OS=Homo sapiens OX=9606 GN=ATG13	2166	5	218.952	204.948	249.039	214.799	191.12	174.09	207.65	205.325	223.868	203.844	225.858	198.651	188.386	182.613	224.006	199.311	-0.11986	0.5413	0.517568		-0.137192	0.582013	0.473984		-0.216819	1.09756	0.136022		-0.0703002	0.411982	0.759222
tr|E7EVC7|E7EVC7_HUMAN	ATG16L1	Autophagy-related protein 16-1 OS=Homo sapiens OX=9606 GN=ATG16L1 PE=1 SV=1	3520	5	298.014	328.094	311.607	339.607	363.776	366.066	331.637	334.67	304.787	307.639	344.431	338.895	329.835	332.108	341.009	358.392	0.0823284	0.847305	0.334731		0.107729	1.02059	0.260656		0.148316	1.17387	0.11757		-0.0160111	0.0970923	0.954272
sp|Q2TAZ0|ATG2A_HUMAN	ATG2A	Autophagy-related protein 2 homolog A OS=Homo sapiens OX=9606 GN=ATG2A PE=1 SV=3	1531	6	211.532	227.809	222.84	243.254	207.435	192.999	201.666	229.547	222.593	221.867	227.326	228.427	214.092	202.976	233.804	233.146	-0.0185509	0.134665	0.870725		-0.0208456	0.0929941	0.900859		-0.172386	1.67989	0.0485589	+	-0.00916219	0.0717324	0.964034
sp|Q96BY7|ATG2B_HUMAN	ATG2B	Autophagy-related protein 2 homolog B OS=Homo sapiens OX=9606 GN=ATG2B PE=1 SV=5	1531	9	274.73	301.251	288.526	287.634	285.524	280.544	264.134	303.556	304.729	262.973	296.494	263.327	279.454	274.775	305.005	277.341	-0.0429893	0.302692	0.715426		-0.0125642	0.0790168	0.916183		-0.057776	0.599177	0.349366		0.00932236	0.0409199	0.980721
sp|Q9NT62|ATG3_HUMAN	ATG3	Ubiquitin-like-conjugating enzyme ATG3 OS=Homo sapiens OX=9606 GN=ATG3 PE=1 SV=1	2139	4	181.923	157.251	193.143	186.942	158.592	185.503	158.048	188.824	164.63	176.241	167.958	162.645	145.949	135.878	167.555	162.289	-0.177067	0.973104	0.286053		-0.21366	0.856393	0.320811		-0.103123	0.44684	0.482218		-0.0242246	0.101521	0.951391
sp|Q9Y4P1-2|ATG4B_HUMAN	ATG4B	Isoform 2 of Cysteine protease ATG4B OS=Homo sapiens OX=9606 GN=ATG4B	4427	4	403.114	429.534	434.166	407.046	395.634	410.616	428.419	414.704	430.979	414.692	428.549	444.034	373.055	397.962	380.809	397.76	-0.0145101	0.0596029	0.944721		-0.0931509	1.3786	0.168056		-0.0240235	0.220053	0.728322		0.00623022	0.0671623	0.964175
sp|Q9H1Y0|ATG5_HUMAN	ATG5	Autophagy protein 5 OS=Homo sapiens OX=9606 GN=ATG5 PE=1 SV=2	6288	4	1122.3	1116.16	1106.13	1096.95	1170.99	1139.95	1091.52	1091.59	1035.72	1063.86	1068.53	1055.6	1067.86	1091.79	1082.4	1115.53	-0.0615342	2.93734	0.0304194	+	-0.0181191	0.51845	0.515493		0.0300074	0.378773	0.552418		-0.0622141	1.03524	0.442963
sp|O95352|ATG7_HUMAN	ATG7	Ubiquitin-like modifier-activating enzyme ATG7 OS=Homo sapiens OX=9606 GN=ATG7 PE=1 SV=1	2142	8	259.18	221.218	268.585	270.487	240.718	232.419	251.034	239.873	229.322	297.797	267.059	238.649	226.894	253.572	231.777	227.087	-0.0604012	0.249698	0.764042		-0.0989643	0.536519	0.503213		-0.0744387	0.425375	0.50436		-0.000431993	0.00103325	0.999566
sp|Q7Z3C6|ATG9A_HUMAN	ATG9A	Autophagy-related protein 9A OS=Homo sapiens OX=9606 GN=ATG9A PE=1 SV=3	2244	8	429.27	477.527	457.363	448.453	558.593	528.921	535.651	510.506	555.305	529.775	446.334	501.74	526.115	472.294	485.66	462.081	0.11454	0.61828	0.463047		0.0636515	0.80144	0.347851		0.25644	2.86094	0.00730917	+	0.231255	2.23916	0.103763
sp|P31939|PUR9_HUMAN	ATIC	Bifunctional purine biosynthesis protein PURH OS=Homo sapiens OX=9606 GN=ATIC PE=1 SV=3	1534	17	2587.61	2536.72	2457.67	2538.4	2668.35	2466.12	2399.94	2513.29	2380.01	2497.42	2433.97	2361.58	2359	2632.09	2542.91	2423.73	-0.0852024	1.95939	0.0836812		0.00102392	0.0086892	0.989233		-0.0118857	0.0835538	0.901367		-0.0386211	0.575051	0.663357
sp|Q8NHH9|ATLA2_HUMAN	ATL2	Atlastin-2 OS=Homo sapiens OX=9606 GN=ATL2 PE=1 SV=2	1749	9	467.035	459.228	454.638	466.136	481.791	463.139	473.354	464.163	479.542	478.556	449.396	489.808	489.33	488.701	494.427	505.118	0.0432845	0.393312	0.63706		0.103391	2.33336	0.0580395		0.0338714	0.785453	0.243587		0.0379395	0.95405	0.473574
sp|Q6DD88|ATLA3_HUMAN	ATL3	Atlastin-3 OS=Homo sapiens OX=9606 GN=ATL3 PE=1 SV=1	1749	10	679.063	741.181	733.667	715.228	714.906	678.302	732.909	668.665	712.984	703.528	714.354	764.454	787.904	710.221	747.611	739.078	0.0746379	0.661335	0.434635		0.0303692	0.358607	0.647034		-0.0172865	0.149573	0.816014		-0.0451379	0.506953	0.703585
sp|Q13315|ATM_HUMAN	ATM	Serine-protein kinase ATM OS=Homo sapiens OX=9606 GN=ATM PE=1 SV=4	424	15	1418.25	1443.48	1457.02	1413.49	1530.04	1476.23	1496.86	1481.8	1450.97	1371.84	1467.26	1494.93	1430.7	1537.92	1500.31	1396.53	0.0309882	0.636233	0.451		0.0437096	0.391512	0.619957		0.0668224	1.6242	0.0529268		0.0011739	0.0106884	0.995636
sp|P54259|ATN1_HUMAN	ATN1	Atrophin-1 OS=Homo sapiens OX=9606 GN=ATN1 PE=1 SV=3	3191	1	38.0674	32.9213	33.4065	36.1361	33.2387	31.7226	30.5365	33.775	34.3402	40.2257	27.0948	21.975	32.6332	39.2054	28.9854	31.1893	-0.383547	0.867004	0.326835		-0.0944768	0.25502	0.735684		-0.14065	1.16209	0.120832		0.0377039	0.147169	0.926668
tr|E5RIM7|E5RIM7_HUMAN	ATOX1	Copper transport protein ATOX1 OS=Homo sapiens OX=9606 GN=ATOX1 PE=1 SV=1	6955	4	307.084	275.569	270.827	237.472	267.869	227.411	202.81	229.9	232.073	202.564	284.501	202.063	204.256	233.093	247.784	226.023	-0.257005	0.602164	0.47253		-0.206058	1.16441	0.215796		-0.232558	0.75173	0.258456		-0.29689	1.52213	0.265508
tr|E9PEJ6|E9PEJ6_HUMAN	ATP11A	Phospholipid-transporting ATPase OS=Homo sapiens OX=9606 GN=ATP11A PE=1 SV=1	2192	6	414.727	466.297	460.686	463.458	454.721	489.855	500.373	437.119	494.407	478.285	512.189	543.498	554.71	454.209	487.447	501.687	0.251153	2.28474	0.0593474		0.0927213	0.748458	0.37664		0.0943717	0.773575	0.248565		0.0581235	0.365122	0.791396
sp|Q9Y2G3|AT11B_HUMAN	ATP11B	Probable phospholipid-transporting ATPase IF OS=Homo sapiens OX=9606 GN=ATP11B PE=1 SV=2	2192	7	193.224	195.458	175.855	185.898	213.26	212.476	209.005	198.815	192.698	220.329	207.447	199.886	205.754	205.88	208.461	222.549	0.124439	1.54004	0.133091		0.178727	1.79678	0.107928		0.174643	1.92136	0.0330678	+	0.119302	0.77814	0.550759
sp|Q8NB49|AT11C_HUMAN	ATP11C	Phospholipid-transporting ATPase IG OS=Homo sapiens OX=9606 GN=ATP11C PE=1 SV=3	2192	5	389.868	421.41	418.621	405.07	393.432	445.789	427.55	415.907	446.097	474.273	441.028	441.648	447.765	401.426	425.841	451.676	0.11833	1.79668	0.0993048		0.0597392	0.445999	0.574968		0.045683	0.305021	0.628819		0.122606	0.856209	0.518799
sp|Q9HD20|AT131_HUMAN	ATP13A1	Manganese-transporting ATPase 13A1 OS=Homo sapiens OX=9606 GN=ATP13A1 PE=1 SV=2	1927	12	666.336	774.745	657.312	715.02	769.82	681.247	720.613	692.68	685.002	717.685	881.404	916.01	1006.73	879.993	827.181	801.674	0.411124	2.38927	0.0534624		0.25177	1.8626	0.102619		0.0428413	0.22838	0.718967		-0.00725067	0.0423611	0.980021
sp|Q9NQ11|AT132_HUMAN	ATP13A2	Cation-transporting ATPase 13A2 OS=Homo sapiens OX=9606 GN=ATP13A2 PE=1 SV=2	2123	4	180.731	173.03	202.812	169.863	195.411	188.747	205.152	192.457	202.851	205.638	201.976	214.422	232.462	196.77	200.157	219.836	0.253199	1.53307	0.134486		0.180678	1.19782	0.208999		0.115874	0.825995	0.225074		0.144343	1.0781	0.423935
tr|A0A2R8YDN7|A0A2R8YDN7_HUMAN	ATP13A3	Cation-transporting ATPase OS=Homo sapiens OX=9606 GN=ATP13A3 PE=1 SV=1	4293	5	137.059	136.754	128.702	130.244	147.343	153.415	162.287	142.509	149.603	140.385	137.102	143.891	136.396	133.162	147.241	141.322	0.0631012	0.898191	0.312538		0.077208	0.696615	0.405749		0.212147	1.79712	0.0388144	+	0.114286	1.51725	0.265666
sp|P05023-4|AT1A1_HUMAN	ATP1A1	Isoform 4 of Sodium/potassium-transporting ATPase subunit alpha-1 OS=Homo sapiens OX=9606 GN=ATP1A1	614	10	965.977	1003.88	927.322	906.393	1026.53	1080.6	1096.91	1010.09	1089.61	1057.44	961.188	1022.18	1191.24	912.275	933.972	976.396	0.149418	0.618815	0.462978		-0.0147395	0.126	0.866347		0.168102	1.91789	0.0331664	+	0.146708	1.61175	0.23149
tr|A0A0A0MT26|A0A0A0MT26_HUMAN	ATP1A3	Sodium/potassium-transporting ATPase subunit alpha-3 OS=Homo sapiens OX=9606 GN=ATP1A3 PE=1 SV=1	614	12	1524.87	1595.56	1500.6	1562.86	1322.21	1361.87	1405.87	1718.82	1893.06	1663.75	1469.24	1440.9	1586.29	1530.22	1580.1	1584.33	-0.0455537	0.393868	0.636668		0.0177567	0.289137	0.706597		-0.181451	2.34115	0.0164598	+	0.184073	1.169	0.383113
sp|P05026|AT1B1_HUMAN	ATP1B1	Sodium/potassium-transporting ATPase subunit beta-1 OS=Homo sapiens OX=9606 GN=ATP1B1 PE=1 SV=1	4365	5	374.457	371.982	394.503	419.732	353.404	392.16	387.04	434.085	418.208	494.753	374.92	402.021	429.962	362.414	363.514	383.696	0.0436365	0.246015	0.767425		-0.0758466	0.743389	0.37912		-0.0473033	0.314172	0.619621		0.200584	1.03923	0.439775
sp|P54709|AT1B3_HUMAN	ATP1B3	Sodium/potassium-transporting ATPase subunit beta-3 OS=Homo sapiens OX=9606 GN=ATP1B3 PE=1 SV=1	4995	6	164.686	141.657	173.197	173.342	136.322	160.636	152.666	182.727	176.779	184.608	153.511	127.575	153.807	142.559	139.541	141.164	-0.171769	0.697264	0.413016		-0.205499	1.2445	0.19803		-0.121641	0.564554	0.376884		0.156662	0.98311	0.46011
sp|P16615|AT2A2_HUMAN	ATP2A2	Sarcoplasmic/endoplasmic reticulum calcium ATPase 2 OS=Homo sapiens OX=9606 GN=ATP2A2 PE=1 SV=1	1188	15	1846.16	1883.98	1900.29	1967.15	1785.87	1920.49	1912.04	1853.24	2000.13	1951.63	1879.05	2052.97	2210.01	2041.84	2105.12	1982.27	0.10543	0.592394	0.479638		0.105149	1.55291	0.139706		-0.0207547	0.201778	0.750379		0.0264482	0.277483	0.848777
sp|Q93084-5|AT2A3_HUMAN	ATP2A3	Isoform SERCA3E of Sarcoplasmic/endoplasmic reticulum calcium ATPase 3 OS=Homo sapiens OX=9606 GN=ATP2A3	1188	2	80.5986	91.2124	88.9625	78.5723	83.3092	92.6947	89.2863	71.9331	90.6002	84.6883	77.2841	90.1501	105.979	98.8564	100.086	95.3934	0.0942683	0.252486	0.761754		0.21233	1.67322	0.124214		0.0613331	0.379756	0.551743		-0.0456898	0.149009	0.926123
sp|P20020-1|AT2B1_HUMAN	ATP2B1	Isoform D of Plasma membrane calcium-transporting ATPase 1 OS=Homo sapiens OX=9606 GN=ATP2B1	1004	15	1272.61	1299.66	1269.14	1253.83	1429.9	1495.96	1547.73	1304.56	1377.41	1312.41	1336.42	1394.67	1495.64	1329.14	1312.88	1367.93	0.143991	1.06332	0.256467		0.0693781	1.45536	0.155182		0.226684	1.86536	0.0349029	+	0.0635505	0.966656	0.46537
sp|P23634|AT2B4_HUMAN	ATP2B4	Plasma membrane calcium-transporting ATPase 4 OS=Homo sapiens OX=9606 GN=ATP2B4 PE=1 SV=2	1004	7	566.528	631.417	579.551	572.591	770.253	821.903	853.48	606.138	646.821	618.514	711.63	682.25	761.713	708.095	595.98	625.693	0.290263	2.14687	0.0701373		0.128259	0.660425	0.427077		0.472591	3.11429	0.0056	+	0.0873111	0.95297	0.474049
sp|P98194-7|AT2C1_HUMAN	ATP2C1	Isoform 7 of Calcium-transporting ATPase type 2C member 1 OS=Homo sapiens OX=9606 GN=ATP2C1	128	8	312.456	338.279	312.589	324.593	362.353	350.659	370.673	340.899	381.432	364.605	307.855	376.46	366.922	334.727	332.74	346.796	0.117216	0.485868	0.560878		0.0709644	1.06664	0.244737		0.166346	2.24904	0.018806	+	0.16951	1.33715	0.320081
sp|P25705|ATPA_HUMAN	ATP5F1A	ATP synthase subunit alpha, mitochondrial OS=Homo sapiens OX=9606 GN=ATP5F1A PE=1 SV=1	2813	17	2056.12	2123.91	1929.09	1840.66	1524.42	1929.96	1889.91	2022.44	1998.14	2069.09	1720.65	1957.92	2332.56	1957.14	1809.62	1969.61	0.0026989	0.00631991	0.993824		-0.0545831	0.387497	0.623254		-0.163648	0.571142	0.371903		0.0325527	0.26507	0.858098
sp|P06576|ATPB_HUMAN	ATP5F1B	ATP synthase subunit beta, mitochondrial OS=Homo sapiens OX=9606 GN=ATP5F1B PE=1 SV=3	1944	12	1279.09	1388.46	1219.14	1193.55	972.44	1283.6	1217.11	1299.43	1295.61	1331.86	1124.21	1259.12	1555.95	1340.43	1230.26	1323.79	0.0372761	0.0874551	0.917277		0.0330129	0.209876	0.779664		-0.141319	0.428881	0.501632		0.0458861	0.377282	0.783326
sp|P36542|ATPG_HUMAN	ATP5F1C	ATP synthase subunit gamma, mitochondrial OS=Homo sapiens OX=9606 GN=ATP5F1C PE=1 SV=1	5821	8	819.049	870.902	829.578	856.966	571.86	717.924	715.876	863.7	919.045	876.061	799.597	924.916	951.063	815.242	778.013	879.062	0.0756931	0.362099	0.666095		-0.0360231	0.246711	0.742491		-0.343951	1.08491	0.13989		0.0702134	0.972015	0.463236
sp|Q9UII2|ATIF1_HUMAN	ATP5IF1	ATPase inhibitor, mitochondrial OS=Homo sapiens OX=9606 GN=ATP5IF1 PE=1 SV=1	5311	3	1240.41	956.175	985.89	863.403	857.508	1175.85	944.999	1137.26	955.686	1108.65	940.838	887.252	1174.63	1153.06	1193.54	1286.04	-0.0128953	0.0263258	0.973624		0.271108	1.0619	0.246976		-0.0266718	0.0529703	0.93655		0.0862162	0.257775	0.862684
sp|Q06055-2|AT5G2_HUMAN	ATP5MC2	Isoform 2 of ATP synthase F(0) complex subunit C2, mitochondrial OS=Homo sapiens OX=9606 GN=ATP5MC2	4672	1	69.2184	59.5888	52.6914	54.6496	56.1262	46.0575	40.9411	37.7336	59.7692	37.2346	49.8571	44.4618	71.4462	42.0129	42.4854	38.0041	-0.117753	0.194653	0.816798		-0.525509	2.34886	0.0571448		-0.311607	0.891782	0.199686		-0.422862	0.719318	0.580709
sp|Q96IX5|ATPMD_HUMAN	ATP5MD	ATP synthase membrane subunit DAPIT, mitochondrial OS=Homo sapiens OX=9606 GN=ATP5MD PE=1 SV=1	8283	1	5.27472	9.22526	8.52188	6.56335	8.57061	6.93325	6.3801	7.13818	8.02097	10.6271	8.42049	13.3229	7.42974	10.5107	8.6216	6.50352	0.381779	0.531382	0.524816		0.215082	0.329235	0.671027		0.00293083	0.00434096	0.994946		0.230431	0.39689	0.770206
sp|P56385|ATP5I_HUMAN	ATP5ME	ATP synthase subunit e, mitochondrial OS=Homo sapiens OX=9606 GN=ATP5ME PE=1 SV=2	5755	2	62.8462	61.3737	66.2431	57.4071	43.4846	64.0696	59.1228	65.0745	61.6132	64.5551	56.0198	65.7585	73.7093	60.0767	63.2097	61.1934	0.0653756	0.196217	0.816353		-0.00950213	0.0696573	0.926151		-0.174992	0.383173	0.548721		0.0423429	0.362508	0.793573
tr|G3V325|G3V325_HUMAN	ATP5MF-PTCD1	ATP5MF-PTCD1 readthrough OS=Homo sapiens OX=9606 GN=ATP5MF-PTCD1 PE=4 SV=1	2396	7	292.258	294.526	300.532	295.648	197.007	252.369	233.725	274.878	293.527	311.529	252.515	275.895	302.427	265.8	256.282	284.85	-0.0985674	0.495644	0.554457		-0.138167	1.06645	0.244758		-0.384728	1.17485	0.11725		-0.0137088	0.0870076	0.956564
sp|O75964|ATP5L_HUMAN	ATP5MG	ATP synthase subunit g, mitochondrial OS=Homo sapiens OX=9606 GN=ATP5MG PE=1 SV=3	6697	2	276.682	312.779	293.701	273.811	232.035	309.373	276.013	298.279	337.635	312.117	271.952	320.685	388.064	326.532	289.818	336.351	0.163376	0.412473	0.621523		0.133888	0.765636	0.366515		-0.0940833	0.279252	0.657109		0.127846	0.889706	0.503899
tr|G3V556|G3V556_HUMAN	ATP5MPL	ATP synthase subunit ATP5MPL, mitochondrial OS=Homo sapiens OX=9606 GN=ATP5MPL PE=1 SV=1	7622	2	77.9081	76.7944	77.2756	67.2456	62.9029	83.2716	72.7366	70.3411	86.6469	84.4522	72.3285	88.8564	100.383	76.3341	75.2119	82.4521	0.210604	0.580839	0.488316		0.0617248	0.412349	0.60119		-0.0426793	0.118419	0.856148		0.101994	0.387823	0.77524
sp|P24539|AT5F1_HUMAN	ATP5PB	ATP synthase F(0) complex subunit B1, mitochondrial OS=Homo sapiens OX=9606 GN=ATP5PB PE=1 SV=2	2934	7	1632.61	1705.16	1528.95	1517.7	1186.82	1513.24	1506.93	1662.95	1673.04	1700.92	1428.56	1613.36	2001.83	1628.44	1475.93	1622.44	0.0624377	0.149479	0.857288		-0.0184521	0.109539	0.883418		-0.194094	0.638651	0.323001		0.0746319	0.800167	0.543065
sp|O75947|ATP5H_HUMAN	ATP5PD	ATP synthase subunit d, mitochondrial OS=Homo sapiens OX=9606 GN=ATP5PD PE=1 SV=3	1752	5	192.062	188.612	177.911	167.887	137.55	172.271	177.09	175.022	180.849	198.998	187.103	174.556	242.175	173.023	177.454	196.97	0.135614	0.348006	0.676346		0.00655164	0.0306145	0.96727		-0.169204	0.556599	0.382216		0.0261153	0.136478	0.932727
sp|P48047|ATPO_HUMAN	ATP5PO	ATP synthase subunit O, mitochondrial OS=Homo sapiens OX=9606 GN=ATP5PO PE=1 SV=1	6614	4	473.762	459.026	444.076	493.899	393.282	498.374	440.168	489.35	453.337	513.121	476.303	472.898	552.987	473.471	469.088	509.66	0.0957778	0.487607	0.559956		0.049783	0.430945	0.586		-0.0808245	0.296656	0.637688		0.0524763	0.34921	0.803444
sp|Q15904|VAS1_HUMAN	ATP6AP1	V-type proton ATPase subunit S1 OS=Homo sapiens OX=9606 GN=ATP6AP1 PE=1 SV=2	5168	1	8.82983	10.8366	7.15231	8.61512	8.98171	4.52749	7.9151	10.7461	7.53646	6.21443	8.36415	5.43479	7.3675	10.3344	9.09717	7.77778	-0.335504	0.676511	0.425216		0.0400098	0.0840097	0.911586		-0.354607	0.435119	0.494213		-0.139626	0.200942	0.89501
sp|O75787|RENR_HUMAN	ATP6AP2	Renin receptor OS=Homo sapiens OX=9606 GN=ATP6AP2 PE=1 SV=2	7168	2	1248.41	1354.58	1237.26	1204.07	1159.59	1230.91	1267.16	1142.2	1236.02	1276.54	1129.22	1256.77	1239.11	1219.36	1281.4	1268.96	-0.0618009	0.437239	0.601945		-0.0040875	0.0326247	0.965029		-0.0482717	0.395395	0.535583		-0.0499993	0.345853	0.805725
sp|Q93050-3|VPP1_HUMAN	ATP6V0A1	Isoform 3 of V-type proton ATPase 116 kDa subunit a isoform 1 OS=Homo sapiens OX=9606 GN=ATP6V0A1	2712	6	142.162	139.315	132.995	154.559	153.808	145.447	152.82	145.451	173.227	148.992	146.455	134.356	136.145	154.611	147.905	143.223	-0.0324666	0.215198	0.798935		0.0641716	0.522075	0.513696		0.0847984	0.769658	0.250179		0.12979	0.617737	0.639796
sp|Q9Y487|VPP2_HUMAN	ATP6V0A2	V-type proton ATPase 116 kDa subunit a isoform 2 OS=Homo sapiens OX=9606 GN=ATP6V0A2 PE=1 SV=2	4815	4	308.792	368.268	354.038	357.324	315.94	333.495	327.366	352.372	395.463	387.67	329.044	350.37	359.763	334.134	338.814	331.256	-0.000729943	0.00353891	0.996986		-0.0491765	0.346177	0.657256		-0.089392	0.661627	0.309071		0.126358	0.797221	0.543657
sp|P38606|VATA_HUMAN	ATP6V1A	V-type proton ATPase catalytic subunit A OS=Homo sapiens OX=9606 GN=ATP6V1A PE=1 SV=2	2205	7	818.236	881.352	871.641	871.408	888.424	811.463	814.189	879.619	829.629	870.82	885.661	839.99	827.358	875.345	846.032	889.666	-0.0162833	0.159472	0.848563		0.0164465	0.198002	0.788968		-0.039117	0.318232	0.614664		-0.000922957	0.00857631	0.996361
sp|P21281|VATB2_HUMAN	ATP6V1B2	V-type proton ATPase subunit B, brain isoform OS=Homo sapiens OX=9606 GN=ATP6V1B2 PE=1 SV=3	3601	9	803.258	838.404	830.772	879.253	808.429	808.22	811.047	840.843	828.671	839.278	840.902	818.296	742.034	776.338	824.743	808.898	-0.0673781	0.454602	0.5893		-0.0605309	0.778968	0.358608		-0.0495085	0.78786	0.24277		-0.00213179	0.0254671	0.987318
sp|P21283|VATC1_HUMAN	ATP6V1C1	V-type proton ATPase subunit C 1 OS=Homo sapiens OX=9606 GN=ATP6V1C1 PE=1 SV=4	4521	5	489.851	444.755	489.055	467.917	502.262	464.701	485.292	461.3	482.951	471.54	510.523	475.867	471.424	471.122	529.143	498.33	0.0394524	0.336994	0.6876		0.0785525	0.593423	0.46657		0.0341311	0.305851	0.627804		-0.00208005	0.0183129	0.991847
sp|Q9Y5K8|VATD_HUMAN	ATP6V1D	V-type proton ATPase subunit D OS=Homo sapiens OX=9606 GN=ATP6V1D PE=1 SV=1	252	5	559.71	640.544	585.136	583.045	612.313	588.749	612.729	625.434	577.108	566.593	646.397	661.462	570.378	602.291	621.58	631.681	0.0792432	0.425553	0.610822		0.0644432	0.64256	0.436698		0.0316346	0.282451	0.652851		-0.00541855	0.0306733	0.986247
sp|P36543|VATE1_HUMAN	ATP6V1E1	V-type proton ATPase subunit E 1 OS=Homo sapiens OX=9606 GN=ATP6V1E1 PE=1 SV=1	1105	8	339.908	341.302	361.578	369.793	333.824	355.392	349.188	333.122	329.354	338.119	376.506	337.277	336.232	340.805	387.705	348.25	-0.0139498	0.0786058	0.926294		0.0220386	0.121323	0.870573		-0.0284702	0.289096	0.64482		-0.0815642	1.16135	0.386793
sp|O75348|VATG1_HUMAN	ATP6V1G1	V-type proton ATPase subunit G 1 OS=Homo sapiens OX=9606 GN=ATP6V1G1 PE=1 SV=3	5459	3	1365.01	1262.91	1270.39	1248.03	1397	1289.59	1288.88	1382.95	1358.43	1285.9	1181.25	1169.85	1290.05	1307.55	1312.73	1313.87	-0.0846252	0.70638	0.405748		0.0284395	0.394745	0.617392		0.042474	0.367236	0.566048		0.0615091	0.663908	0.613653
sp|Q9UI12|VATH_HUMAN	ATP6V1H	V-type proton ATPase subunit H OS=Homo sapiens OX=9606 GN=ATP6V1H PE=1 SV=1	6556	6	1398.79	1415.08	1447.15	1433.45	1301.34	1316.22	1278.73	1477.82	1392.81	1426.61	1314.73	1267.59	1274.4	1330.44	1326.77	1296.74	-0.147218	2.60843	0.0382718	+	-0.111205	2.89071	0.0366061	+	-0.132405	3.14501	0.00515821	+	0.00857773	0.111498	0.94722
sp|Q04656-3|ATP7A_HUMAN	ATP7A	Isoform 2 of Copper-transporting ATPase 1 OS=Homo sapiens OX=9606 GN=ATP7A	2829	3	317.178	375.231	342.662	342.447	347.224	341.041	368.251	341.277	391.861	360.982	367.406	382.482	462.705	298.128	327.955	347.774	0.226185	0.843468	0.335718		-0.0855747	0.453463	0.568297		0.0340658	0.22596	0.721774		0.0829694	0.478697	0.719481
sp|O43520|AT8B1_HUMAN	ATP8B1	Phospholipid-transporting ATPase IC OS=Homo sapiens OX=9606 GN=ATP8B1 PE=1 SV=3	6468	2	23.2501	26.4614	24.337	27.2101	22.4891	24.4332	26.403	22.752	30.0679	29.4684	26.3808	26.1036	26.9319	22.3634	26.8548	32.4326	0.067246	0.53119	0.524979		0.0908164	0.204163	0.783427		-0.0508481	0.235945	0.710847		0.107357	0.296957	0.837016
sp|O75110|ATP9A_HUMAN	ATP9A	Probable phospholipid-transporting ATPase IIA OS=Homo sapiens OX=9606 GN=ATP9A PE=1 SV=3	1805	3	41.369	30.9455	38.0263	39.325	42.916	45.123	41.26	40.0463	44.7586	39.1389	49.338	54.9082	56.4512	42.0045	45.3024	52.8317	0.523727	2.25443	0.0622377		0.321997	1.18887	0.210398		0.211526	0.99314	0.165999		0.148965	0.629233	0.631661
sp|O43861|ATP9B_HUMAN	ATP9B	Probable phospholipid-transporting ATPase IIB OS=Homo sapiens OX=9606 GN=ATP9B PE=2 SV=4	1805	5	124.963	134.109	141.016	145.295	131.436	158.557	132.66	128.634	163.22	153.278	155.798	167.66	186.012	147.134	149.993	158.622	0.315266	1.55347	0.129916		0.157602	1.37453	0.168796		0.0440941	0.162432	0.799452		0.117142	0.419754	0.754012
tr|I3L448|I3L448_HUMAN	ATPAF1	ATP synthase mitochondrial F1 complex assembly factor 1 OS=Homo sapiens OX=9606 GN=ATPAF1 PE=1 SV=1	2303	1	6.22832	9.08533	8.31073	5.20108	4.96355	6.91378	7.00558	8.05874	7.56325	5.50567	9.23102	8.81812	12.3363	6.89894	6.79068	7.69772	0.509891	1.0609	0.257606		0.0174119	0.0299023	0.967799		-0.177592	0.297163	0.636997		-0.0172158	0.0231008	0.989571
sp|Q13535|ATR_HUMAN	ATR	Serine/threonine-protein kinase ATR OS=Homo sapiens OX=9606 GN=ATR PE=1 SV=3	2080	14	1088.38	1094.08	1089.07	1097.25	1054.02	988.904	1032.24	1131.49	1141.89	1120.68	1083.8	1093.27	1076.68	1054.99	1143.2	1106.06	-0.0101098	0.601966	0.47252		0.0113565	0.114621	0.87753		-0.092028	1.12349	0.128734		0.0507849	1.84377	0.173621
sp|Q8WXE1|ATRIP_HUMAN	ATRIP	ATR-interacting protein OS=Homo sapiens OX=9606 GN=ATRIP PE=1 SV=1	2540	2	67.1312	77.6512	64.4794	60.941	66.9029	62.2984	67.2004	65.8705	67.5135	63.1473	75.7309	66.1618	71.9985	76.0728	54.2698	59.2253	0.081555	0.371808	0.658607		-0.105479	0.247736	0.741693		-0.0401495	0.186094	0.770107		-0.0388843	0.185145	0.902176
sp|O75882|ATRN_HUMAN	ATRN	Attractin OS=Homo sapiens OX=9606 GN=ATRN PE=1 SV=2	4112	3	56.2523	57.8599	62.2428	66.4303	61.1323	63.525	74.5924	58.5187	75.7059	83.3342	61.0773	71.805	68.2302	61.0035	63.3275	64.7487	0.143154	0.758016	0.380088		0.056969	0.407439	0.604922		0.12754	0.532106	0.400264		0.244181	0.611148	0.644768
sp|P46100|ATRX_HUMAN	ATRX	Transcriptional regulator ATRX OS=Homo sapiens OX=9606 GN=ATRX PE=1 SV=5	2552	10	547.904	509.79	547.676	552.486	551.264	540.328	557.552	539.389	581.165	531.297	513.269	546.588	510.115	501.065	558.674	548.833	-0.0437746	0.457026	0.588349		-0.00964785	0.0591198	0.936957		0.02779	0.391081	0.5406		0.0291591	0.235828	0.873784
sp|Q9UBB4|ATX10_HUMAN	ATXN10	Ataxin-10 OS=Homo sapiens OX=9606 GN=ATXN10 PE=1 SV=1	3844	4	754.745	741.391	750.476	676.5	752.109	718.085	705.026	745.049	701.12	728.474	737.98	670.624	687.255	746.549	710.483	695.878	-0.0647195	0.520601	0.535116		-0.0254062	0.209577	0.779807		-0.010439	0.0806442	0.905187		-0.0107386	0.085571	0.957469
sp|P0C7T5|ATX1L_HUMAN	ATXN1L	Ataxin-1-like OS=Homo sapiens OX=9606 GN=ATXN1L PE=1 SV=1	376	2	22.7208	16.469	13.866	20.2381	24.4403	21.7689	22.6524	25.7571	20.6992	17.7811	15.768	19.6023	22.6391	16.3673	19.3268	20.6018	0.0875151	0.150949	0.85512		0.0532985	0.103981	0.889997		0.348967	0.953862	0.177882		0.233532	0.466623	0.724905
sp|Q99700|ATX2_HUMAN	ATXN2	Ataxin-2 OS=Homo sapiens OX=9606 GN=ATXN2 PE=1 SV=2	2735	9	429.162	462.114	437.54	433.114	465.898	461.798	443.243	452.876	453.858	468.576	474.525	464.575	418.436	428.321	445.148	464.604	0.0373177	0.23083	0.781242		0.0178431	0.161109	0.82553		0.053308	0.785005	0.243713		0.0580635	0.993938	0.457804
sp|Q8WWM7-3|ATX2L_HUMAN	ATXN2L	Isoform 3 of Ataxin-2-like protein OS=Homo sapiens OX=9606 GN=ATXN2L	2735	11	1481.82	1513.4	1402.92	1569.82	1505.94	1477.29	1352.8	1601.44	1443.77	1552.97	1447.69	1457.17	1373.35	1548.46	1515.76	1559.46	-0.0645084	0.705395	0.406223		0.0479251	0.586725	0.469687		-0.0461935	0.323364	0.60875		0.038698	0.279482	0.848291
tr|F5H211|F5H211_HUMAN	ATXN3	Ataxin-3 OS=Homo sapiens OX=9606 GN=ATXN3 PE=1 SV=2	5689	2	377.199	377.683	366.472	395.398	391.813	401.364	361.088	383.399	363.852	333.316	357.724	360.076	350.796	354.661	371.295	355.018	-0.089784	1.67123	0.114816		-0.0734113	1.16609	0.214931		0.0200981	0.141274	0.82407		-0.0760146	0.485873	0.713688
sp|O15265-2|ATX7_HUMAN	ATXN7	Isoform b of Ataxin-7 OS=Homo sapiens OX=9606 GN=ATXN7	4	2	80.2441	81.5507	77.4243	78.0518	95.2313	88.6467	85.0826	65.1846	63.6232	60.3212	87.0378	87.4675	76.3515	72.0107	69.527	85.6661	0.0736875	0.431247	0.607435		-0.0724914	0.284472	0.709827		0.175461	1.28361	0.0955453		-0.331745	2.58108	0.0636098
sp|Q9ULK2|AT7L1_HUMAN	ATXN7L1	Ataxin-7-like protein 1 OS=Homo sapiens OX=9606 GN=ATXN7L1 PE=1 SV=3	7722	1	39.263	34.557	39.7347	45.7326	40.8763	43.7317	40.1396	38.5345	35.8855	26.5349	38.4202	43.5411	38.9048	39.147	33.3162	40.0253	0.021621	0.0764823	0.928444		-0.0844301	0.29613	0.698652		0.0685474	0.308705	0.625138		-0.253962	0.581096	0.660817
sp|Q96GX2|A7L3B_HUMAN	ATXN7L3B	Ataxin-7-like protein 3B OS=Homo sapiens OX=9606 GN=ATXN7L3B PE=1 SV=2	4486	1	32.2733	37.7066	39.7337	36.1997	25.5556	35.118	31.6059	25.125	30.2554	31.0688	34.0458	32.4058	34.6875	39.7415	41.5912	25.7807	-0.11016	0.722824	0.396709		-0.0584694	0.0866346	0.908339		-0.254193	0.720913	0.27363		-0.342281	1.33485	0.320109
sp|Q13825|AUHM_HUMAN	AUH	Methylglutaconyl-CoA hydratase, mitochondrial OS=Homo sapiens OX=9606 GN=AUH PE=1 SV=1	2008	3	83.1064	72.5988	70.8576	90.624	54.6775	79.8838	58.2573	76.7949	75.6523	78.5168	60.3395	70.715	87.343	79.6484	63.7172	79.3127	-0.13266	0.298771	0.719784		-0.0956369	0.286414	0.7079		-0.316167	0.714292	0.277827		-0.035465	0.15287	0.923667
sp|Q9Y679|AUP1_HUMAN	AUP1	Ancient ubiquitous protein 1 OS=Homo sapiens OX=9606 GN=AUP1 PE=1 SV=2	6203	6	883.572	963.245	933.861	883.649	847.902	858.387	860.885	922.087	952.177	984.879	840.193	913.068	982.456	945.19	911.02	922.773	-0.00853765	0.0392936	0.959251		0.0168714	0.187515	0.798081		-0.0973675	1.31869	0.0900261		0.0575434	0.652306	0.621136
sp|O14965|AURKA_HUMAN	AURKA	Aurora kinase A OS=Homo sapiens OX=9606 GN=AURKA PE=1 SV=2	3267	5	426.523	398.653	454.828	459.39	313.515	313.302	322.685	423.414	443.141	473.329	462.558	449.723	371.83	455.086	456.99	436.068	-0.0270947	0.085528	0.918157		0.0494189	0.403321	0.608721		-0.456128	2.85634	0.00727813	+	0.03936	0.236109	0.873821
sp|Q8WXX7|AUTS2_HUMAN	AUTS2	Autism susceptibility gene 2 protein OS=Homo sapiens OX=9606 GN=AUTS2 PE=1 SV=1	6553	1	4.955	3.96739	7.11834	8.56166	4.67552	3.07753	9.19634	9.15479	10.5776	5.59755	8.2624	10.208	7.8398	7.05137	8.7196	8.76556	0.566375	0.969868	0.286969		0.468044	0.794903	0.351819		-0.207307	0.144228	0.821088		0.470794	0.570534	0.66484
sp|Q9NQS1|AVEN_HUMAN	AVEN	Cell death regulator Aven OS=Homo sapiens OX=9606 GN=AVEN PE=1 SV=1	4911	3	87.59	81.6624	84.4536	88.89	65.7138	77.0437	75.9176	79.184	74.7521	87.4064	92.5004	82.1967	76.7273	77.3806	82.2818	82.9383	-0.0348945	0.149314	0.857201		-0.0827933	0.951255	0.283724		-0.235552	1.15775	0.121701		-0.0926339	0.531558	0.686684
sp|Q8NBF6|AVL9_HUMAN	AVL9	Late secretory pathway protein AVL9 homolog OS=Homo sapiens OX=9606 GN=AVL9 PE=1 SV=1	3468	7	1134.08	1127.03	1034.36	1074.12	1234.1	1159.19	1129.84	1059.15	1204.85	1011.61	1072.32	1005.13	1110.98	1067.45	1145.84	1031.81	-0.0398353	0.308829	0.711585		-0.0145684	0.0954249	0.898492		0.104413	1.02078	0.157455		-0.00368088	0.0144848	0.993703
sp|O15169|AXIN1_HUMAN	AXIN1	Axin-1 OS=Homo sapiens OX=9606 GN=AXIN1 PE=1 SV=2	4121	1	9.84752	14.2071	16.6656	18.846	13.4403	12.3372	13.7404	16.64	15.4452	14.764	16.9891	12.6784	12.6253	15.5256	14.9687	16.4197	-0.0527941	0.0757752	0.929312		0.110115	0.201186	0.786681		-0.137893	0.258206	0.684276		0.107405	0.193915	0.898568
sp|P30530|UFO_HUMAN	AXL	Tyrosine-protein kinase receptor UFO OS=Homo sapiens OX=9606 GN=AXL PE=1 SV=4	1307	4	94.8712	89.322	77.1023	94.3592	80.0172	83.2123	86.1521	117.514	127.236	121.196	79.2802	80.525	80.4006	84.3844	82.2459	89.6119	-0.14628	0.898675	0.312442		-0.053944	0.277372	0.715728		-0.0928164	0.538455	0.395454		0.460341	2.46732	0.0743542
sp|Q9H6S1|AZI2_HUMAN	AZI2	5-azacytidine-induced protein 2 OS=Homo sapiens OX=9606 GN=AZI2 PE=1 SV=1	8023	1	36.7487	36.0819	34.156	38.6627	39.1549	22.85	25.3286	38.648	47.5002	56.6829	42.9867	37.8059	34.4685	38.1003	30.742	36.2811	0.0729143	0.281397	0.732862		-0.0599353	0.222581	0.766866		-0.362294	0.574971	0.369081		0.370735	0.855021	0.519982
sp|P61769|B2MG_HUMAN	B2M	Beta-2-microglobulin OS=Homo sapiens OX=9606 GN=B2M PE=1 SV=1	7001	1	132.451	118.547	126.541	102.674	127.878	104.432	112.718	110.902	113.94	110.731	120.893	125.769	126.243	126.034	131.523	149.558	0.0564218	0.268991	0.745437		0.179463	0.79039	0.353621		-0.0604651	0.201622	0.750592		-0.0956088	0.495164	0.708731
tr|A0A0A0MS93|A0A0A0MS93_HUMAN	B3GALT5	Hexosyltransferase OS=Homo sapiens OX=9606 GN=B3GALT5 PE=1 SV=1	6036	6	504.833	538.801	470.912	480.146	455.708	443.077	468.732	508.018	545.113	523.019	538.399	521.223	570.505	556.06	568.328	550.757	0.124816	1.07919	0.252222		0.165004	1.56796	0.136845		-0.127979	1.26429	0.0991217		0.0766437	0.687218	0.603194
sp|Q96L58|B3GT6_HUMAN	B3GALT6	Beta-1,3-galactosyltransferase 6 OS=Homo sapiens OX=9606 GN=B3GALT6 PE=1 SV=2	3699	2	138.826	144.055	131.708	136.551	180.635	188.748	176.147	125.016	134.728	154.298	185.042	177.06	170.066	148.495	136.222	157.898	0.364392	2.96603	0.0286441	+	0.0967856	0.595573	0.465313		0.400436	3.59714	0.00232692	+	-0.00237618	0.00807695	0.996441
sp|O94766|B3GA3_HUMAN	B3GAT3	Galactosylgalactosylxylosylprotein 3-beta-glucuronosyltransferase 3 OS=Homo sapiens OX=9606 GN=B3GAT3 PE=1 SV=2	4964	2	157.685	143.571	138.125	143.97	139.793	128.054	147.551	157.321	142.85	141.279	150.06	157.629	148.533	151.029	156.871	149.374	0.0616472	0.583585	0.487305		0.0651397	0.653752	0.430804		-0.0755521	0.447044	0.482098		0.0129483	0.0714099	0.96368
sp|Q6Y288|B3GLT_HUMAN	B3GLCT	Beta-1,3-glucosyltransferase OS=Homo sapiens OX=9606 GN=B3GLCT PE=1 SV=2	4679	2	178.388	179.855	171.727	169.664	180.586	178.335	186.782	180.78	174.089	191.184	184.292	193.44	188.727	189.133	178.845	189.101	0.110564	1.88868	0.0885197		0.08626	1.20863	0.205888		0.0567146	0.974529	0.171687		0.0568448	0.541793	0.681994
sp|Q9NY97|B3GN2_HUMAN	B3GNT2	N-acetyllactosaminide beta-1,3-N-acetylglucosaminyltransferase 2 OS=Homo sapiens OX=9606 GN=B3GNT2 PE=1 SV=2	4761	1	24.3798	21.6378	28.0233	27.4603	33.9286	29.6566	24.4596	22.4925	28.2866	26.9028	31.0936	28.1665	29.6716	30.3723	30.1518	31.397	0.230757	1.15253	0.22566		0.279405	1.34555	0.175859		0.204615	0.547716	0.388199		0.0299694	0.0804215	0.960049
sp|Q9Y2A9|B3GN3_HUMAN	B3GNT3	N-acetyllactosaminide beta-1,3-N-acetylglucosaminyltransferase 3 OS=Homo sapiens OX=9606 GN=B3GNT3 PE=1 SV=2	6978	1	69.5986	72.3013	72.9039	69.741	70.4214	59.3361	61.5383	87.8513	83.4513	65.4553	59.8936	60.2722	73.7753	67.4691	63.5468	65.6468	-0.144593	0.554108	0.508472		-0.118014	1.70815	0.11972		-0.161468	0.798952	0.237688		0.138565	0.396894	0.770394
sp|Q67FW5|B3GNL_HUMAN	B3GNTL1	UDP-GlcNAc:betaGal beta-1,3-N-acetylglucosaminyltransferase-like protein 1 OS=Homo sapiens OX=9606 GN=B3GNTL1 PE=2 SV=2	7184	1	19.2752	20.4408	18.1894	21.0784	17.7279	13.4147	15.6425	19.7011	23.2314	24.115	24.5775	17.8757	22.5207	19.9339	20.6385	22.2171	0.122931	0.32768	0.695457		0.0848123	0.591332	0.467199		-0.347496	1.09876	0.135644		0.175496	0.748566	0.56798
sp|P15291|B4GT1_HUMAN	B4GALT1	Beta-1,4-galactosyltransferase 1 OS=Homo sapiens OX=9606 GN=B4GALT1 PE=1 SV=5	6149	2	580.517	602.687	591.35	577.508	645.104	613.437	649.113	556.851	560.682	537.714	566.651	566.243	569.719	599.744	616.001	596.99	-0.0509393	1.47852	0.141365		0.0393453	0.970367	0.278391		0.112655	1.54656	0.0604384		-0.0918791	1.77486	0.186428
sp|O60512|B4GT3_HUMAN	B4GALT3	Beta-1,4-galactosyltransferase 3 OS=Homo sapiens OX=9606 GN=B4GALT3 PE=1 SV=2	7026	1	191.118	207.349	207.81	219.144	181.266	181.944	191.14	180.857	208.334	211.221	175.198	186.504	197.418	192.949	194.389	200.768	-0.146935	1.09823	0.245489		-0.0725187	0.75137	0.375569		-0.158006	1.63124	0.0521695		-0.0459169	0.212593	0.889031
sp|O60513|B4GT4_HUMAN	B4GALT4	Beta-1,4-galactosyltransferase 4 OS=Homo sapiens OX=9606 GN=B4GALT4 PE=1 SV=1	6764	3	64.8485	69.8287	71.2095	59.4528	63.9728	69.3644	73.1913	67.3566	69.3521	74.9375	57.7948	64.06	67.6074	70.4838	69.9319	79.8233	-0.0703287	0.329621	0.693296		0.147174	0.825114	0.334986		0.0549318	0.274051	0.663322		0.090972	0.555038	0.673917
sp|O43286|B4GT5_HUMAN	B4GALT5	Beta-1,4-galactosyltransferase 5 OS=Homo sapiens OX=9606 GN=B4GALT5 PE=1 SV=1	4738	1	95.3802	83.9212	86.9958	95.7034	74.0735	78.5847	69.1579	111.165	117.951	123.56	91.4205	79.9369	90.6199	96.8729	93.5099	104.732	-0.0518245	0.26333	0.751973		0.121054	0.861878	0.318755		-0.291194	1.93142	0.0326835	+	0.378402	2.653	0.0554094
sp|Q9UBV7|B4GT7_HUMAN	B4GALT7	Beta-1,4-galactosyltransferase 7 OS=Homo sapiens OX=9606 GN=B4GALT7 PE=1 SV=1	731	6	359.458	389.446	374.889	367.253	388.753	393.342	401.392	355.471	376.151	375.748	377.04	424.262	355.349	360.059	368.497	376.822	0.0453488	0.211138	0.804399		-0.0163646	0.206989	0.781879		0.0822622	1.42796	0.0744699		-0.014018	0.143901	0.928472
sp|Q9BPU9|B9D2_HUMAN	B9D2	B9 domain-containing protein 2 OS=Homo sapiens OX=9606 GN=B9D2 PE=1 SV=2	1552	1	10.8868	17.5561	14.3177	11.6252	12.7318	13.5425	13.192	14.6454	10.4465	12.5971	12.947	10.0325	11.0082	11.2357	10.7412	9.51639	-0.245443	0.596113	0.47657		-0.350825	0.963952	0.279715		-0.022204	0.0472478	0.944011		-0.101882	0.187826	0.902997
sp|Q9NWV8|BABA1_HUMAN	BABAM1	BRISC and BRCA1-A complex member 1 OS=Homo sapiens OX=9606 GN=BABAM1 PE=1 SV=1	3459	3	235.282	255.721	261.418	293.814	276.385	285.075	264.733	282.19	256.568	288.138	268.042	272.908	240.887	273.571	272.681	300.47	-0.00281238	0.0108174	0.989605		0.112894	0.655676	0.429653		0.0782972	0.466294	0.462341		0.0783668	0.405788	0.763647
sp|Q9NXR7-1|BABA2_HUMAN	BABAM2	Isoform 1 of BRISC and BRCA1-A complex member 2 OS=Homo sapiens OX=9606 GN=BABAM2	7389	3	382.633	396.077	377.554	363.293	354.73	383.807	399.333	383.344	392.174	333.286	393.004	299.713	377.746	381.028	352.651	339.378	-0.099709	0.299728	0.71842		-0.0878793	0.68097	0.416062		-0.00332481	0.0192379	0.976322		-0.0425916	0.201345	0.894347
sp|O14867|BACH1_HUMAN	BACH1	Transcription regulator protein BACH1 OS=Homo sapiens OX=9606 GN=BACH1 PE=1 SV=2	4188	5	331.528	323.775	358.471	340.872	651.09	631.893	631.558	328.489	338.502	343.631	365.131	393.601	344.838	365.683	409.005	393.674	0.11822	0.81779	0.347997		0.201102	1.55733	0.139262		0.915015	5.02817	0	+	-0.00684567	0.0651837	0.965923
sp|Q92934|BAD_HUMAN	BAD	Bcl2-associated agonist of cell death OS=Homo sapiens OX=9606 GN=BAD PE=1 SV=3	6730	1	18.35	20.0078	20.2041	22.4513	15.2779	19.3752	20.7499	19.8251	23.4703	20.1026	20.273	20.4891	22.1829	20.4725	19.1899	20.9835	0.0535073	0.306672	0.713518		-1.74537e-05	8.09623e-05	0.999863		-0.141527	0.387363	0.544356		0.0607348	0.244836	0.867263
sp|Q99933|BAG1_HUMAN	BAG1	BAG family molecular chaperone regulator 1 OS=Homo sapiens OX=9606 GN=BAG1 PE=1 SV=4	3327	3	99.7774	97.4513	101.625	97.887	100.811	85.5939	95.0501	89.5814	93.0191	92.7959	111.22	108.961	116.621	100.392	102.527	93.9733	0.178356	1.90473	0.0869632		-0.0040054	0.0323697	0.965159		-0.0833314	0.455429	0.473159		-0.111661	2.17477	0.109658
sp|O95816|BAG2_HUMAN	BAG2	BAG family molecular chaperone regulator 2 OS=Homo sapiens OX=9606 GN=BAG2 PE=1 SV=1	5281	4	232.113	232.537	233.593	232.569	201.531	191.648	190.309	211.502	215.814	223.642	184.451	191.711	201.533	210.167	219.59	199.694	-0.27409	1.7568	0.103524		-0.150439	1.20431	0.207116		-0.259218	2.01657	0.0285188	+	-0.101269	1.30868	0.325729
sp|O95817|BAG3_HUMAN	BAG3	BAG family molecular chaperone regulator 3 OS=Homo sapiens OX=9606 GN=BAG3 PE=1 SV=3	480	3	144.913	97.8627	149.848	129.747	119.093	140.716	111.307	142.75	118.692	136.422	123.489	99.5565	79.093	108.462	83.8701	103.016	-0.379274	0.751967	0.383581		-0.397043	1.10648	0.231155		-0.0659983	0.14437	0.821036		0.0371252	0.0822098	0.959352
sp|Q9UL15-2|BAG5_HUMAN	BAG5	Isoform 2 of BAG family molecular chaperone regulator 5 OS=Homo sapiens OX=9606 GN=BAG5	5724	2	530.768	522.735	529.286	514.198	563.519	528.583	552.98	545.177	554.15	537.862	488.247	471.555	519.522	508.596	533.111	521.295	-0.0893925	0.814581	0.349773		-0.00911443	0.149901	0.841001		0.064474	0.887939	0.201253		0.057946	1.69404	0.209513
sp|P46379-3|BAG6_HUMAN	BAG6	Isoform 3 of Large proline-rich protein BAG6 OS=Homo sapiens OX=9606 GN=BAG6	1817	13	1003.68	966.549	1004.47	1044.99	951.5	896.646	944.648	1004.8	1007.93	1046.02	983.637	1030.8	876.798	986.457	927.791	946.225	-0.0631082	0.333365	0.689852		-0.0757161	1.05896	0.248093		-0.11029	1.50289	0.0657582		0.0212036	0.296146	0.836405
sp|Q9P281|BAHC1_HUMAN	BAHCC1	BAH and coiled-coil domain-containing protein 1 OS=Homo sapiens OX=9606 GN=BAHCC1 PE=1 SV=4	2390	2	62.4942	58.8305	62.0835	60.8069	48.3881	63.5257	55.4287	59.2773	61.916	62.0675	56.1715	53.4208	50.1112	54.5894	69.5421	59.9074	-0.198892	1.42686	0.152972		6.43879e-05	0.00019243	0.99978		-0.138808	0.462237	0.466099		0.000860482	0.00980258	0.995586
sp|Q8TBE0|BAHD1_HUMAN	BAHD1	Bromo adjacent homology domain-containing 1 protein OS=Homo sapiens OX=9606 GN=BAHD1 PE=1 SV=2	4546	3	206.939	196.808	206.774	221.725	191.842	182.389	185.907	207.843	226.405	218.709	210.085	185.93	198.418	211.14	217.76	215.908	-0.0709466	0.495992	0.554631		0.0480801	0.560208	0.486947		-0.155199	1.82427	0.0371866	+	0.0654324	0.597081	0.650518
sp|Q9UQB8|BAIP2_HUMAN	BAIAP2	Brain-specific angiogenesis inhibitor 1-associated protein 2 OS=Homo sapiens OX=9606 GN=BAIAP2 PE=1 SV=1	1485	11	593.849	611.17	636.48	600.371	625.632	611.534	666.988	577.525	593.064	620.598	644.057	631.308	609.534	644.007	633.2	634.67	0.0416699	0.597098	0.475504		0.0625049	1.22385	0.202386		0.0557261	0.550917	0.385969		-0.0321664	0.35724	0.796686
sp|Q9UHR4|BI2L1_HUMAN	BAIAP2L1	Brain-specific angiogenesis inhibitor 1-associated protein 2-like protein 1 OS=Homo sapiens OX=9606 GN=BAIAP2L1 PE=1 SV=2	2770	8	791.067	771.974	802.393	802.242	838.24	789.358	810.773	828.75	791.812	815.239	920.935	863.404	911.276	868.94	887.95	878.405	0.181833	1.91208	0.0872857		0.149699	3.57976	0.0137391	+	0.0372724	0.557631	0.381417		0.0359313	0.694165	0.600362
sp|Q6UXY1|BI2L2_HUMAN	BAIAP2L2	Brain-specific angiogenesis inhibitor 1-associated protein 2-like protein 2 OS=Homo sapiens OX=9606 GN=BAIAP2L2 PE=1 SV=1	1923	1	8.18448	6.05303	9.13611	4.31921	9.87076	3.58374	6.57452	10.6364	9.15785	11.4216	8.08071	8.97781	10.7615	9.10161	10.3714	6.12095	0.46966	0.814381	0.34994		0.324915	0.425517	0.589465		-0.11272	0.0802218	0.905188		0.639989	1.14096	0.397116
sp|Q16611|BAK_HUMAN	BAK1	Bcl-2 homologous antagonist/killer OS=Homo sapiens OX=9606 GN=BAK1 PE=1 SV=1	7009	2	41.0796	37.134	38.0995	37.3835	33.9494	38.6196	41.2551	36.8987	43.5031	43.4113	37.5996	35.4869	46.6381	40.2661	37.8292	42.9108	0.0456702	0.128033	0.878171		0.0693015	0.474945	0.551273		-0.0217368	0.0836481	0.901339		0.100085	0.476572	0.719919
sp|O75531|BAF_HUMAN	BANF1	Barrier-to-autointegration factor OS=Homo sapiens OX=9606 GN=BANF1 PE=1 SV=1	4295	1	173.504	121.267	133.168	94.8002	217.457	249.516	236.467	185.255	122.897	101.283	161.707	129.779	176.793	181.005	158.718	148.764	0.278159	0.569823	0.495819		0.346166	0.813263	0.341855		0.874826	1.89654	0.0340806	+	0.0494434	0.0541784	0.974316
sp|Q8N9N5|BANP_HUMAN	BANP	Protein BANP OS=Homo sapiens OX=9606 GN=BANP PE=1 SV=3	7180	1	9.20577	6.82008	11.5211	11.01	9.35625	6.40984	5.34902	9.30094	7.70159	7.14936	7.50493	9.73006	9.35835	10.6182	7.7587	7.94624	-0.100972	0.18869	0.822275		-0.121634	0.213311	0.776355		-0.464655	0.722296	0.273473		-0.239703	0.526086	0.689837
sp|Q92560|BAP1_HUMAN	BAP1	Ubiquitin carboxyl-terminal hydrolase BAP1 OS=Homo sapiens OX=9606 GN=BAP1 PE=1 SV=2	5828	3	125.145	130.139	130.863	131.61	114.657	113.716	116.885	121.129	121.515	127.983	136.016	129.293	120.262	127.308	132.55	133.249	-0.0117946	0.0733965	0.931552		0.0176664	0.267509	0.724383		-0.169379	3.36614	0.00358621	+	-0.0674514	1.00017	0.454724
sp|Q8IXM2-3|BAP18_HUMAN	BAP18	Isoform 3 of Chromatin complexes subunit BAP18 OS=Homo sapiens OX=9606 GN=BAP18	1014	3	366.5	319.497	369.267	392.892	402.404	360.585	391.313	356.993	367.21	369.865	355.317	360.761	355.066	335.41	343.944	363.291	-0.0160241	0.0881661	0.91692		-0.0556948	0.322786	0.67697		0.0903325	0.517139	0.413355		0.0143968	0.0772421	0.961743
sp|Q99728|BARD1_HUMAN	BARD1	BRCA1-associated RING domain protein 1 OS=Homo sapiens OX=9606 GN=BARD1 PE=1 SV=2	3255	3	49.3479	42.0071	50.6552	51.6071	46.3545	53.9338	46.5538	53.0131	46.9908	42.7567	62.3075	62.1439	50.3685	48.8479	50.8453	52.7157	0.265371	0.993802	0.276992		0.0737392	0.421286	0.592992		0.0171239	0.0606285	0.926831		-0.0255162	0.0800675	0.960471
sp|Q07812-2|BAX_HUMAN	BAX	Isoform Beta of Apoptosis regulator BAX OS=Homo sapiens OX=9606 GN=BAX	6654	2	259.156	241.603	258.573	266.304	256.338	259.711	231.607	248.921	252.585	256.586	257.952	243.391	237.614	241.117	253.48	235.682	-0.0578601	0.564636	0.499808		-0.0747106	0.833186	0.331162		-0.0419818	0.274519	0.662859		-0.0202264	0.246309	0.867225
sp|Q9NRL2|BAZ1A_HUMAN	BAZ1A	Bromodomain adjacent to zinc finger domain protein 1A OS=Homo sapiens OX=9606 GN=BAZ1A PE=1 SV=2	4837	8	482.171	520.3	489.846	466.703	474.374	452.252	464.376	515.46	472.572	455.877	492.837	458.492	435.839	471.282	507.679	523.184	-0.0836629	0.601354	0.472604		0.0316781	0.222358	0.767105		-0.0781154	0.992091	0.166137		-0.0259173	0.154703	0.922181
sp|Q9UIG0|BAZ1B_HUMAN	BAZ1B	Tyrosine-protein kinase BAZ1B OS=Homo sapiens OX=9606 GN=BAZ1B PE=1 SV=2	2867	12	1196.26	1129.33	1275.81	1304.38	1263.72	1530.96	1488.85	1389.04	1111.81	1155.46	1543.86	1568.85	1286.48	1323.09	1225.8	1376.8	0.254366	1.05031	0.26043		0.094124	0.640748	0.437624		0.216577	0.959139	0.175909		-0.0137054	0.041567	0.980866
sp|Q9UIF9|BAZ2A_HUMAN	BAZ2A	Bromodomain adjacent to zinc finger domain protein 2A OS=Homo sapiens OX=9606 GN=BAZ2A PE=1 SV=4	2406	7	130.15	126.614	116.594	132.217	129.325	139.944	145.275	108.277	127.574	130.43	128.621	138.797	116.857	134.154	129.1	144.49	0.0173622	0.0728205	0.932182		0.104863	0.789927	0.353596		0.128626	0.960657	0.175762		-0.0531411	0.21336	0.888879
sp|Q9UIF8|BAZ2B_HUMAN	BAZ2B	Bromodomain adjacent to zinc finger domain protein 2B OS=Homo sapiens OX=9606 GN=BAZ2B PE=1 SV=3	6507	1	107.477	123.771	123.396	117.375	100.667	113.631	114.774	112.134	105.474	111.304	118.884	117.349	94.4925	129.029	119.102	112.193	-0.103653	0.34965	0.675039		0.025428	0.124012	0.868011		-0.105616	0.618953	0.335476		-0.104325	0.914463	0.491497
sp|Q8NFJ9-2|BBS1_HUMAN	BBS1	Isoform 3 of Bardet-Biedl syndrome 1 protein OS=Homo sapiens OX=9606 GN=BBS1	1506	1	11.9321	16.42	15.3455	15.6436	12.9418	10.0415	10.1072	13.5535	13.4163	12.7151	10.8948	15.5864	12.3276	18.1659	11.3353	11.1464	-0.203149	0.476476	0.568821		-0.158878	0.238537	0.75075		-0.42729	1.30996	0.0917981		-0.155358	0.635439	0.629539
sp|Q96RK4-2|BBS4_HUMAN	BBS4	Isoform 2 of Bardet-Biedl syndrome 4 protein OS=Homo sapiens OX=9606 GN=BBS4	314	1	10.4551	17.3739	11.8072	11.8398	5.78853	9.43372	10.7734	9.02854	14.0195	8.64508	9.54105	6.35694	14.5506	8.07794	11.8848	13.7422	-0.396209	0.423605	0.612536		-0.202847	0.293375	0.7015		-0.59123	0.828883	0.223968		-0.292793	0.459933	0.728619
sp|Q8IWZ6|BBS7_HUMAN	BBS7	Bardet-Biedl syndrome 7 protein OS=Homo sapiens OX=9606 GN=BBS7 PE=1 SV=2	5968	1	19.0474	21.9076	25.7135	23.6302	19.2433	14.8462	20.9921	22.7807	22.9712	23.1186	19.1016	26.5895	16.897	22.2078	20.7556	20.6371	-0.132273	0.232926	0.779883		-0.0827767	0.348395	0.654729		-0.304614	0.770335	0.249989		0.0328516	0.128038	0.935394
sp|Q8WY36|BBX_HUMAN	BBX	HMG box transcription factor BBX OS=Homo sapiens OX=9606 GN=BBX PE=1 SV=1	6107	4	94.0251	94.7962	97.1893	97.4498	138.142	122.902	122.272	94.1218	101.094	105.165	107.665	99.763	94.725	93.9916	90.8932	99.3038	0.0694096	0.489521	0.558768		-0.0179819	0.164392	0.821939		0.412347	1.81697	0.037577	+	0.0614128	0.496337	0.709114
sp|P50895|BCAM_HUMAN	BCAM	Basal cell adhesion molecule OS=Homo sapiens OX=9606 GN=BCAM PE=1 SV=2	1574	7	116.385	124.364	120.096	118.72	110.387	130.868	133.201	107.78	124.399	126.091	151.979	148.118	138.914	135.325	137.633	134.931	0.286964	2.18573	0.0681875		0.181853	2.96533	0.0335862	+	0.0534562	0.219916	0.728491		-0.00879643	0.0379958	0.982852
sp|Q9UHQ4|BAP29_HUMAN	BCAP29	B-cell receptor-associated protein 29 OS=Homo sapiens OX=9606 GN=BCAP29 PE=1 SV=2	3024	6	229.51	285.237	264.855	253.089	262.786	293.847	293.515	213.124	253.495	236.189	262.521	302.565	284.6	266.674	275.824	275.049	0.135646	0.730015	0.392818		0.0822799	0.520691	0.514314		0.136905	0.778407	0.246377		-0.139361	0.659384	0.616633
sp|P51572-2|BAP31_HUMAN	BCAP31	Isoform 2 of B-cell receptor-associated protein 31 OS=Homo sapiens OX=9606 GN=BCAP31	1265	11	989.914	1016.37	974.269	908.514	1053.64	1085.24	1037.28	946.453	979.392	954.141	978.274	1123.53	1192.58	1085.67	1084.38	1035.34	0.171952	0.775392	0.372064		0.136993	1.64959	0.126684		0.123874	1.52408	0.0629505		-0.0172482	0.173556	0.909289
sp|P56945-3|BCAR1_HUMAN	BCAR1	Isoform 3 of Breast cancer anti-estrogen resistance protein 1 OS=Homo sapiens OX=9606 GN=BCAR1	47	16	1599.18	1597.43	1720.76	1676.91	1610.42	1529.75	1589.04	1611.82	1655.8	1602.53	1673.43	1597.4	1464.1	1533.46	1656.08	1601.31	-0.0643014	0.41861	0.616575		-0.0458789	0.483975	0.542927		-0.064188	0.911937	0.192608		-0.0216273	0.292671	0.838597
sp|O75815|BCAR3_HUMAN	BCAR3	Breast cancer anti-estrogen resistance protein 3 OS=Homo sapiens OX=9606 GN=BCAR3 PE=1 SV=1	3924	6	134.219	138.746	141.051	137.536	166.909	168.632	169.86	143.751	145.216	137.405	163.553	158.39	137.542	151.935	144.676	140.913	0.147772	0.720574	0.397533		0.0804295	0.95965	0.281474		0.289163	4.38307	0.000433735	+	0.0434703	0.666216	0.612758
sp|O75934|SPF27_HUMAN	BCAS2	Pre-mRNA-splicing factor SPF27 OS=Homo sapiens OX=9606 GN=BCAS2 PE=1 SV=1	5267	4	291.123	281.795	310.291	289.248	309.046	246.536	302.819	269.231	321.742	286.201	280.901	281.293	314.919	298.605	295.534	284.26	-0.00484551	0.0257257	0.973405		-0.000959732	0.00873445	0.989384		-0.0411924	0.133411	0.835699		-0.00662506	0.0265769	0.986864
sp|Q9H6U6-8|BCAS3_HUMAN	BCAS3	Isoform 4 of Breast carcinoma-amplified sequence 3 OS=Homo sapiens OX=9606 GN=BCAS3	5228	7	747.314	760.385	759.751	777.057	752.283	741.861	786.69	798.405	764.43	740.846	829.135	840.329	742.442	724.55	766.978	774.427	0.0769486	0.514747	0.539454		-0.0115314	0.126884	0.865438		-0.00192472	0.0223635	0.973149		0.0122283	0.129476	0.934633
sp|O15382|BCAT2_HUMAN	BCAT2	Branched-chain-amino-acid aminotransferase, mitochondrial OS=Homo sapiens OX=9606 GN=BCAT2 PE=1 SV=2	135	7	441.905	512.801	493.243	478.815	387.592	520.489	476.367	519.733	488.789	519.215	471.982	538.699	559.985	496.457	431.313	507.428	0.118558	0.589751	0.481515		-0.0114398	0.0448109	0.950934		-0.0704822	0.192864	0.761174		0.0817959	0.712728	0.587135
sp|Q9P287|BCCIP_HUMAN	BCCIP	BRCA2 and CDKN1A-interacting protein OS=Homo sapiens OX=9606 GN=BCCIP PE=1 SV=1	381	2	165.86	161.817	176.83	182.5	171.864	153.369	169.145	178.24	171.397	163.223	148.998	150.514	158.965	155.58	149.154	148.451	-0.167347	1.69612	0.110913		-0.183832	1.89273	0.0994286		-0.0598022	0.38827	0.543467		-0.005978	0.0376994	0.983169
sp|Q9P287-2|BCCIP_HUMAN	BCCIP	Isoform 2 of BRCA2 and CDKN1A-interacting protein OS=Homo sapiens OX=9606 GN=BCCIP	381	5	1008.88	960.589	974.062	1048.28	972.279	925.55	1000.28	1022.36	892.877	1036.19	958.061	922.741	873.58	966.214	879.768	978.211	-0.120481	1.17829	0.216765		-0.0849381	0.66314	0.426085		-0.0468042	0.476475	0.451818		-0.0229721	0.108354	0.947557
sp|P21953|ODBB_HUMAN	BCKDHB	2-oxoisovalerate dehydrogenase subunit beta, mitochondrial OS=Homo sapiens OX=9606 GN=BCKDHB PE=1 SV=2	6174	1	48.5863	49.0151	49.3961	35.7871	43.7862	47.3736	47.867	44.4653	47.9935	45.3616	39.1599	46.5151	53.9797	48.8714	47.1897	51.8297	0.0270946	0.053512	0.950841		0.121011	0.425872	0.589111		0.0317939	0.0937771	0.889743		0.0195937	0.056798	0.972472
sp|O95999|BCL10_HUMAN	BCL10	B-cell lymphoma/leukemia 10 OS=Homo sapiens OX=9606 GN=BCL10 PE=1 SV=1	4082	1	36.7352	38.7821	39.3557	35.7188	39.5883	28.9128	36.7179	35.4045	40.5988	43.5361	44.8967	37.5152	40.2293	30.5672	46.6979	49.1873	0.115991	0.584099	0.487004		0.13309	0.218917	0.770314		-0.113697	0.304757	0.629012		0.0777415	0.322264	0.821348
sp|Q07817|B2CL1_HUMAN	BCL2L1	Bcl-2-like protein 1 OS=Homo sapiens OX=9606 GN=BCL2L1 PE=1 SV=1	5308	5	875.927	899.649	871.119	862.438	920.629	858.652	888.3	860.387	863.412	869.134	884.098	895.894	893.075	897.561	885.054	840.052	0.0225727	0.728036	0.393671		-0.00544789	0.0576224	0.93756		0.0190476	0.226088	0.721718		-0.0213281	0.694815	0.599653
sp|Q9HB09-3|B2L12_HUMAN	BCL2L12	Isoform 3 of Bcl-2-like protein 12 OS=Homo sapiens OX=9606 GN=BCL2L12	727	1	24.5304	26.8452	31.1717	36.5201	29.0165	37.155	32.3723	23.1536	27.8309	29.7295	30.276	36.3302	35.9768	34.002	33.521	36.8615	0.211763	0.648705	0.441683		0.240559	0.819559	0.338328		0.151356	0.40304	0.527286		-0.137101	0.350438	0.803166
tr|A0A087WX97|A0A087WX97_HUMAN	BCL2L13	Bcl-2-like protein 13 OS=Homo sapiens OX=9606 GN=BCL2L13 PE=1 SV=1	2482	3	206.474	227.059	202.972	193.691	187.317	215.187	214.361	214.789	222.3	223.301	199.676	215.988	230.389	242.149	178.004	206.869	0.0532117	0.280866	0.7335		0.00115784	0.00267244	0.995792		-0.0139778	0.0593455	0.928564		0.087123	0.77185	0.556052
sp|Q5TBC7|B2L15_HUMAN	BCL2L15	Bcl-2-like protein 15 OS=Homo sapiens OX=9606 GN=BCL2L15 PE=1 SV=1	7615	1	105.538	85.2178	109.922	137.453	93.5624	95.7289	85.1647	96.383	120.561	107.999	112.81	120.391	127.686	113.954	145.118	125.637	0.154139	0.435346	0.603118		0.241045	0.64758	0.434669		-0.240817	0.722812	0.273214		-0.00139134	0.00271313	0.997554
sp|Q4VC05-2|BCL7A_HUMAN	BCL7A	Isoform 2 of B-cell CLL/lymphoma 7 protein family member A OS=Homo sapiens OX=9606 GN=BCL7A	4944	1	22.3478	26.3689	31.3992	23.3144	32.3578	34.2947	31.0565	24.9047	29.191	35.9277	34.9523	38.6879	33.1251	31.9579	18.5846	27.6202	0.470668	1.7839	0.100498		-0.0123951	0.0155439	0.981469		0.344602	1.34134	0.0862662		0.211283	0.486123	0.713445
tr|I3L1Q2|I3L1Q2_HUMAN	BCL7C	B-cell CLL/lymphoma 7 protein family member C (Fragment) OS=Homo sapiens OX=9606 GN=BCL7C PE=1 SV=1	4944	2	103.04	91.4381	111.21	91.496	101.796	87.6473	100.29	98.3634	94.1404	107.865	94.0729	94.6928	103.026	101.309	106.521	104.733	-0.026056	0.118106	0.887351		0.0740874	0.430512	0.586189		-0.038238	0.14768	0.818135		0.0146507	0.0568067	0.972605
sp|Q86UU0|BCL9L_HUMAN	BCL9L	B-cell CLL/lymphoma 9-like protein OS=Homo sapiens OX=9606 GN=BCL9L PE=1 SV=1	959	8	657.1	626.594	661.973	633.144	628.22	584.844	605.439	676.483	671.71	649.187	679.565	615.021	573.871	675.93	603.669	596.789	-0.0529129	0.269884	0.744788		-0.04562	0.286871	0.708073		-0.0891364	1.13768	0.126198		0.0466046	0.842708	0.522748
sp|Q9NYF8|BCLF1_HUMAN	BCLAF1	Bcl-2-associated transcription factor 1 OS=Homo sapiens OX=9606 GN=BCLAF1 PE=1 SV=2	3293	9	1673.69	1618.5	1618.67	1609.59	1677.95	1665.71	1594.65	1623.83	1609.84	1593.93	1418.61	1501	1469.52	1524.02	1590.5	1545.37	-0.156216	2.05307	0.0787804		-0.0696931	1.43513	0.15922		0.0138943	0.199752	0.753259		-0.0184959	0.557226	0.672639
sp|A2AJT9|BCLA3_HUMAN	BCLAF3	BCLAF1 and THRAP3 family member 3 OS=Homo sapiens OX=9606 GN=BCLAF3 PE=1 SV=1	6094	3	107.156	107.049	117.416	112.346	118.829	123.246	122.027	104.498	107.606	117.799	148.843	157.852	133.766	142.213	139.916	151.471	0.401301	1.80448	0.0979195		0.381162	3.15446	0.0226957	+	0.129819	1.71068	0.0460067	+	-0.0142033	0.0814328	0.959838
sp|Q6W2J9|BCOR_HUMAN	BCOR	BCL-6 corepressor OS=Homo sapiens OX=9606 GN=BCOR PE=1 SV=1	4533	4	350.004	317.851	366.212	391.764	314.351	323.837	314.308	334.199	347.569	369.995	367.576	352.105	303.928	338.621	341.775	330.056	-0.0636705	0.240832	0.772248		-0.0777868	0.508828	0.522239		-0.162989	1.1018	0.134417		-0.0210923	0.100297	0.951772
sp|Q5H9F3-3|BCORL_HUMAN	BCORL1	Isoform 3 of BCL-6 corepressor-like protein 1 OS=Homo sapiens OX=9606 GN=BCORL1	5051	1	92.4637	92.1511	99.9184	93.436	89.8948	115.318	102.855	83.6633	100.016	73.1388	99.2151	100.59	87.9303	95.8837	97.1155	95.3081	0.0197073	0.102076	0.900833		0.0251243	0.360764	0.644929		0.11337	0.408969	0.521322		-0.153607	0.442613	0.739283
sp|P11274|BCR_HUMAN	BCR	Breakpoint cluster region protein OS=Homo sapiens OX=9606 GN=BCR PE=1 SV=2	84	9	1650.92	1638.9	1631.41	1694.41	1633.43	1583.97	1618.62	1617.27	1606.46	1627.7	1661.47	1678.07	1565.65	1578.9	1592.98	1594.19	-0.0170502	0.186521	0.823517		-0.0579013	1.8886	0.0998014		-0.0369871	1.00552	0.162255		-0.0322983	1.14285	0.395504
sp|Q9Y276|BCS1_HUMAN	BCS1L	Mitochondrial chaperone BCS1 OS=Homo sapiens OX=9606 GN=BCS1L PE=1 SV=1	3352	7	863.978	980.435	882.141	845.776	669.231	870.003	852.236	865.258	947.441	901.062	882.155	966.336	1107.14	903.45	832.525	938.898	0.137682	0.543113	0.517018		-0.00178973	0.0085177	0.989143		-0.171499	0.534645	0.398312		0.0198389	0.121102	0.939765
sp|Q02338|BDH_HUMAN	BDH1	D-beta-hydroxybutyrate dehydrogenase, mitochondrial OS=Homo sapiens OX=9606 GN=BDH1 PE=1 SV=3	5776	3	76.4143	80.8051	75.8863	82.1519	55.998	77.0038	82.5972	84.5466	98.1243	96.0154	103.232	112.972	106.749	86.5247	105.242	95.4497	0.449682	3.18272	0.0207391	+	0.276892	1.19839	0.20895		-0.15214	0.326148	0.606429		0.234935	1.25893	0.344784
sp|Q9BUT1|BDH2_HUMAN	BDH2	3-hydroxybutyrate dehydrogenase type 2 OS=Homo sapiens OX=9606 GN=BDH2 PE=1 SV=2	4157	6	865.487	856.973	853.033	842.431	878.108	802.276	817.9	899.834	831.782	814.925	983.062	963.661	991.526	950.47	986.831	949.8	0.196839	3.53377	0.0136949	+	0.171375	2.36318	0.0562055		-0.0381733	0.358422	0.573477		-0.0108033	0.0815213	0.959795
sp|A6H8Y1|BDP1_HUMAN	BDP1	Transcription factor TFIIIB component B'' homolog OS=Homo sapiens OX=9606 GN=BDP1 PE=1 SV=3	2191	6	130.778	130.575	114.412	109.248	133.882	124.222	130.717	103.916	107.305	100.446	136.466	130.265	122.943	119.323	108.492	113.831	0.102533	0.593135	0.478861		-0.0870095	0.501304	0.528338		0.0999822	0.614768	0.337887		-0.218943	1.4106	0.300331
sp|Q14457|BECN1_HUMAN	BECN1	Beclin-1 OS=Homo sapiens OX=9606 GN=BECN1 PE=1 SV=2	5760	2	49.5703	50.9117	49.3042	49.6959	48.619	42.6928	43.3859	47.2862	48.6607	48.3408	53.6077	58.1572	42.777	54.9171	52.5126	54.3074	0.0350001	0.0879318	0.917341		0.112278	1.87827	0.100694		-0.153831	0.931807	0.185074		-0.0522718	1.54174	0.261086
sp|Q5T5X7|BEND3_HUMAN	BEND3	BEN domain-containing protein 3 OS=Homo sapiens OX=9606 GN=BEND3 PE=1 SV=1	4300	10	647.073	631.018	651.95	653.629	566.696	524.491	568.068	626.835	624.713	619.596	633.836	653.386	608.963	641.174	639.09	603.832	-0.0317442	0.399347	0.632807		-0.0409167	0.551815	0.492799		-0.224692	1.70655	0.046408	+	-0.0503417	1.78938	0.185285
sp|O15155|BET1_HUMAN	BET1	BET1 homolog OS=Homo sapiens OX=9606 GN=BET1 PE=1 SV=1	1729	1	17.7375	10.607	12.3487	20.2305	14.4848	11.0174	14.2099	17.3929	16.8644	12.0958	11.6735	15.6253	14.2368	13.6199	17.3455	10.1985	-0.0992623	0.148598	0.857744		-0.135299	0.166011	0.820543		-0.164438	0.262813	0.678256		0.0508176	0.0651333	0.965904
tr|B8ZZS0|B8ZZS0_HUMAN	BET1L	BET1-like protein OS=Homo sapiens OX=9606 GN=BET1L PE=1 SV=1	3046	1	28.0778	25.5348	19.178	23.3658	24.111	22.6543	25.2302	25.6975	24.2621	23.544	21.6361	28.5295	23.8999	20.2127	25.9379	25.8337	0.0428635	0.0935312	0.911011		0.0017563	0.00347264	0.995264		0.0101063	0.0269222	0.96808		0.0404609	0.118937	0.940223
sp|Q9NZS9|BFAR_HUMAN	BFAR	Bifunctional apoptosis regulator OS=Homo sapiens OX=9606 GN=BFAR PE=1 SV=1	2315	1	20.9825	19.1405	20.9039	15.6029	20.5486	23.0353	24.4722	20.7116	19.7697	20.7263	18.66	22.276	24.18	22.5058	23.6298	24.2759	0.181901	0.550928	0.510392		0.302293	1.28824	0.187902		0.25016	0.994837	0.165595		0.100547	0.404968	0.763711
sp|Q9H694|BICC1_HUMAN	BICC1	Protein bicaudal C homolog 1 OS=Homo sapiens OX=9606 GN=BICC1 PE=1 SV=2	5807	6	256.197	233.427	259.217	265.872	230.601	213.519	230.756	246.305	265.15	255.086	287.179	257.363	226.25	237.108	252.559	244.22	0.0132783	0.0407774	0.957827		-0.051164	0.463727	0.559537		-0.172569	1.57384	0.057993		0.0114668	0.0799986	0.960527
sp|Q96G01|BICD1_HUMAN	BICD1	Protein bicaudal D homolog 1 OS=Homo sapiens OX=9606 GN=BICD1 PE=1 SV=3	1210	12	1062.57	1101.9	1096.56	1114.33	920.81	960.88	917.285	1132.14	1101.29	1123.17	1039.72	1056.84	1055.73	1070.55	1095.52	1078.95	-0.0577806	1.6602	0.115767		-0.0159795	0.38916	0.621531		-0.229563	2.92221	0.0068623	+	0.0327629	0.844114	0.52273
sp|Q8TD16-2|BICD2_HUMAN	BICD2	Isoform 2 of Protein bicaudal D homolog 2 OS=Homo sapiens OX=9606 GN=BICD2	1210	6	518.671	484.059	532.073	552.131	467.383	496.624	466.845	483.235	494.4	498.096	503.905	442.889	469.596	487.631	501.467	477.133	-0.144487	1.01125	0.272012		-0.0928806	0.988211	0.272009		-0.128425	1.30393	0.092504		-0.0833835	0.89841	0.498595
sp|Q9NZM4|BICRA_HUMAN	BICRA	BRD4-interacting chromatin-remodeling complex-associated protein OS=Homo sapiens OX=9606 GN=BICRA PE=1 SV=2	557	4	220.464	222.072	208.505	226.909	192.598	195.862	191.054	194.724	206.22	208.81	204.752	205.668	187.482	199.191	205.815	195.829	-0.139793	1.21399	0.20578		-0.131743	1.95931	0.0907883		-0.183638	2.51657	0.0124136	+	-0.11084	1.32494	0.32429
sp|Q6AI39|BICRL_HUMAN	BICRAL	BRD4-interacting chromatin-remodeling complex-associated protein-like OS=Homo sapiens OX=9606 GN=BICRAL PE=1 SV=2	7986	2	15.3995	20.2714	23.2833	21.1392	16.4435	25.6194	17.7143	22.1508	18.0183	17.6423	19.3377	24.7088	19.2189	17.6637	16.4953	21.4304	0.0809359	0.178237	0.829382		-0.104553	0.246317	0.742911		-0.0188302	0.0266331	0.968348		-0.0467662	0.10316	0.951035
sp|P55957-2|BID_HUMAN	BID	Isoform 2 of BH3-interacting domain death agonist OS=Homo sapiens OX=9606 GN=BID	6975	3	288.708	284.756	297.751	302.805	306.256	283.999	278.065	281.033	281.651	277.55	274.401	260.431	244.619	247.851	258.371	235.197	-0.17705	1.3094	0.178072		-0.248696	1.98081	0.0900972		-0.0209428	0.163575	0.798323		-0.0671596	1.40105	0.302256
sp|O00499|BIN1_HUMAN	BIN1	Myc box-dependent-interacting protein 1 OS=Homo sapiens OX=9606 GN=BIN1 PE=1 SV=1	834	9	1243.55	1216.61	1296.4	1213.2	1246.54	1153.02	1198.37	1187.82	1276.78	1174.2	1188.45	1077.2	1042.55	1165.17	1234.62	1126.41	-0.173837	1.11663	0.23931		-0.0805517	0.796066	0.351217		-0.0511915	0.573667	0.369877		-0.0351634	0.323081	0.82052
sp|Q9NQY0|BIN3_HUMAN	BIN3	Bridging integrator 3 OS=Homo sapiens OX=9606 GN=BIN3 PE=1 SV=1	2508	4	199.365	184.462	201.978	196.518	173.015	182.32	177.372	194.046	198.463	208.458	219.171	189.988	191.911	170.743	193.059	193.675	0.0325687	0.163663	0.844301		-0.0753968	0.467465	0.556909		-0.138849	1.90474	0.0337626	+	0.0347763	0.34801	0.803855
sp|Q13490|BIRC2_HUMAN	BIRC2	Baculoviral IAP repeat-containing protein 2 OS=Homo sapiens OX=9606 GN=BIRC2 PE=1 SV=2	1677	1	55.187	49.3441	51.2077	49.5189	42.6475	48.4642	43.0398	43.9045	45.1879	48.2875	50.8	53.8975	49.8731	51.4955	53.725	49.6528	0.00654971	0.0448882	0.956097		0.00941848	0.0667289	0.929301		-0.199536	1.26674	0.0987974		-0.163901	1.46146	0.285093
sp|O15392-2|BIRC5_HUMAN	BIRC5	Isoform 2 of Baculoviral IAP repeat-containing protein 5 OS=Homo sapiens OX=9606 GN=BIRC5	1994	2	111.972	89.7481	86.9548	93.0353	67.8732	71.5784	68.1459	93.4967	87.6951	91.3238	89.7571	90.6333	94.3094	103.39	96.4142	100.976	-0.0527582	0.242554	0.770411		0.0778224	0.372113	0.637942		-0.456917	2.07929	0.0258828	+	-0.064447	0.301316	0.836028
sp|Q9NR09|BIRC6_HUMAN	BIRC6	Baculoviral IAP repeat-containing protein 6 OS=Homo sapiens OX=9606 GN=BIRC6 PE=1 SV=2	683	17	1410.4	1362.2	1490.57	1476.29	1430.03	1392.36	1397.76	1461.11	1420.68	1451.52	1461.31	1421.63	1391.97	1443.69	1490.21	1453.65	-0.0093253	0.0924515	0.911956		0.028348	0.356176	0.649185		-0.0277393	0.353789	0.578601		0.0104328	0.116258	0.943225
tr|R4GMW8|R4GMW8_HUMAN	BIVM-ERCC5	BIVM-ERCC5 readthrough OS=Homo sapiens OX=9606 GN=BIVM-ERCC5 PE=1 SV=2	2200	12	959.423	964.984	1011.69	987.618	1121.36	1068.51	1113.23	972.934	984.473	962.565	1053.69	1014.41	1019.01	1006.78	1030.55	1024.36	0.0691845	1.41024	0.156648		0.0573932	1.39874	0.164873		0.166632	2.49078	0.0129419	+	-0.010971	0.216962	0.884119
sp|P54132|BLM_HUMAN	BLM	Bloom syndrome protein OS=Homo sapiens OX=9606 GN=BLM PE=1 SV=1	3930	4	165.025	165.723	185.817	175.582	178.996	192.406	195.97	154.214	185.384	181.47	193.302	196.885	181.365	181.74	184.119	182.071	0.139664	1.30583	0.178788		0.0796337	0.84682	0.324712		0.128866	1.12871	0.127898		0.00235568	0.00813882	0.996537
sp|Q13867|BLMH_HUMAN	BLMH	Bleomycin hydrolase OS=Homo sapiens OX=9606 GN=BLMH PE=1 SV=1	2987	7	1511.56	1404.92	1370.29	1359.68	1432.45	1315.01	1306.68	1443	1452.46	1406.18	1351.78	1270.57	1456.6	1527.3	1550.24	1498.29	-0.0550884	0.334799	0.688786		0.112862	1.38809	0.166705		-0.0629139	0.503614	0.425734		0.023715	0.249275	0.866206
sp|P78537|BL1S1_HUMAN	BLOC1S1	Biogenesis of lysosome-related organelles complex 1 subunit 1 OS=Homo sapiens OX=9606 GN=BLOC1S1 PE=1 SV=2	5713	1	8.03456	8.33761	7.00999	7.8209	3.41493	7.94432	10.6944	7.91104	8.1816	8.37489	10.2251	9.09043	10.4854	6.96991	8.56524	11.6181	0.348917	1.9473	0.0846061		0.185329	0.318013	0.681208		-0.233795	0.165601	0.795243		0.0667902	0.495844	0.709157
sp|Q6QNY1|BL1S2_HUMAN	BLOC1S2	Biogenesis of lysosome-related organelles complex 1 subunit 2 OS=Homo sapiens OX=9606 GN=BLOC1S2 PE=1 SV=1	4326	3	209.679	190.804	202.132	197.364	194.229	182.077	175.171	178.565	202.049	182.801	167.074	160.153	180.634	182.905	207.776	176.939	-0.241438	1.65988	0.115649		-0.0826491	0.435829	0.58273		-0.122084	1.07018	0.143454		-0.0919648	0.637744	0.629177
sp|Q6QNY0|BL1S3_HUMAN	BLOC1S3	Biogenesis of lysosome-related organelles complex 1 subunit 3 OS=Homo sapiens OX=9606 GN=BLOC1S3 PE=1 SV=1	6058	1	44.8336	50.1406	47.7206	58.0237	44.8449	45.4507	39.642	44.3644	41.6	47.0462	46.2042	43.779	44.8153	45.3435	48.825	51.0476	-0.153035	0.830629	0.340636		-0.0470005	0.195047	0.792132		-0.208361	1.02498	0.156324		-0.173765	0.893817	0.500844
sp|Q9NUP1|BL1S4_HUMAN	BLOC1S4	Biogenesis of lysosome-related organelles complex 1 subunit 4 OS=Homo sapiens OX=9606 GN=BLOC1S4 PE=1 SV=1	1031	2	131.674	130.991	128.817	139.694	136.568	145.652	136.895	122.886	128.858	129.933	134.15	140.2	129.645	134.009	149.58	126.926	0.0201255	0.185854	0.823592		0.0405705	0.201441	0.786246		0.0732305	0.876914	0.205177		-0.061551	0.830412	0.527941
sp|Q8TDH9|BL1S5_HUMAN	BLOC1S5	Biogenesis of lysosome-related organelles complex 1 subunit 5 OS=Homo sapiens OX=9606 GN=BLOC1S5 PE=1 SV=1	5078	2	50.3349	47.8382	51.2735	51.9481	49.1923	57.1442	50.9178	47.9622	41.1675	46.0789	57.839	45.3947	46.6529	50.9224	61.6348	51.662	-0.0190739	0.0551918	0.949352		0.115798	0.494861	0.533425		0.0558182	0.307416	0.626166		-0.162082	0.925211	0.488211
sp|P53004|BIEA_HUMAN	BLVRA	Biliverdin reductase A OS=Homo sapiens OX=9606 GN=BLVRA PE=1 SV=2	6331	4	284.025	277.22	273.784	292.402	297.946	272.048	290.88	290.755	281.244	288.471	288.415	271.594	291.373	293.788	287.454	300.08	0.00964487	0.089945	0.914849		0.0599745	1.08875	0.237757		0.0252686	0.215932	0.733033		0.0255074	0.439693	0.740143
sp|P30043|BLVRB_HUMAN	BLVRB	Flavin reductase (NADPH) OS=Homo sapiens OX=9606 GN=BLVRB PE=1 SV=3	6952	7	1220.07	1176.24	1268.73	1237.61	1213.58	1186.67	1158.51	1290.95	1242.58	1273.34	1248.43	1213.45	1120.68	1193.12	1175.39	1215.11	-0.0384874	0.290107	0.725697		-0.0367002	0.6354	0.440478		-0.0468692	0.749568	0.259222		0.0504412	0.879899	0.507058
sp|Q9H2G9|GO45_HUMAN	BLZF1	Golgin-45 OS=Homo sapiens OX=9606 GN=BLZF1 PE=1 SV=2	327	2	156.198	145.778	169.834	183.072	180.337	162.124	164.901	170.681	178.469	195.059	176.867	176.926	172.266	166.374	192.086	174.395	0.104228	0.617097	0.464177		0.120259	0.590141	0.467501		0.0505431	0.234542	0.712417		0.151041	0.799765	0.542651
sp|Q9NSY1|BMP2K_HUMAN	BMP2K	BMP-2-inducible protein kinase OS=Homo sapiens OX=9606 GN=BMP2K PE=1 SV=2	1802	5	224.197	217.524	237.701	247.616	255.69	246.301	245.218	219.921	227.249	230.438	288.669	267.576	249.936	255.5	257.187	251.27	0.212843	1.3342	0.17209		0.137661	1.36904	0.170396		0.105496	1.08557	0.13981		-0.0355858	0.314818	0.826894
sp|Q13873|BMPR2_HUMAN	BMPR2	Bone morphogenetic protein receptor type-2 OS=Homo sapiens OX=9606 GN=BMPR2 PE=1 SV=2	6033	6	147.705	160.451	157.502	164.603	150.066	137.489	142.99	277.473	289.884	273.019	156.354	157.539	157.65	158.365	158.452	159.309	-0.00238623	0.0233311	0.976111		0.0115727	0.123776	0.868042		-0.134527	1.34056	0.0862936		0.830805	5.19537	0	+
sp|Q14692|BMS1_HUMAN	BMS1	Ribosome biogenesis protein BMS1 homolog OS=Homo sapiens OX=9606 GN=BMS1 PE=1 SV=1	1388	8	804.054	758.046	763.672	770.099	799.133	760.022	767.417	783.915	753.224	769.514	782.028	743.19	763.003	785.32	805.052	764.376	-0.0210137	0.303386	0.715053		0.0203213	0.288053	0.707521		0.00293544	0.0341482	0.959898		-0.00931909	0.138052	0.931996
sp|Q6ZN30|BNC2_HUMAN	BNC2	Zinc finger protein basonuclin-2 OS=Homo sapiens OX=9606 GN=BNC2 PE=1 SV=1	3367	1	68.6297	58.2996	67.688	59.7397	43.3914	62.1614	64.5698	56.736	51.1814	56.1815	65.7723	90.5302	81.1978	52.7054	48.4436	57.474	0.307463	0.866598	0.326943		-0.265922	1.38011	0.168271		-0.183548	0.371822	0.561108		-0.214984	1.41776	0.299146
sp|Q12981-1|SEC20_HUMAN	BNIP1	Isoform 3 of Vesicle transport protein SEC20 OS=Homo sapiens OX=9606 GN=BNIP1	1227	5	386.387	439.725	380.214	398.41	349.462	388.148	378.297	393.308	402.513	413.943	354.208	373.708	406.307	376.251	371.844	381.522	-0.0855689	0.508679	0.543468		-0.0892086	0.815692	0.340709		-0.108174	0.792578	0.240448		0.00944732	0.0637346	0.967105
tr|J3KN59|J3KN59_HUMAN	BNIP2	BCL2/adenovirus E1B 19 kDa protein-interacting protein 2 OS=Homo sapiens OX=9606 GN=BNIP2 PE=1 SV=1	4173	2	17.4489	21.704	17.332	15.9025	13.9722	18.5768	17.5192	12.669	15.5717	18.302	15.6648	6.71825	10.8902	15.9494	17.2549	13.8576	-0.780376	0.822851	0.345324		-0.202219	0.719511	0.391298		-0.117614	0.304319	0.629392		-0.228537	0.546522	0.679926
sp|Q96IK1|BOD1_HUMAN	BOD1	Biorientation of chromosomes in cell division protein 1 OS=Homo sapiens OX=9606 GN=BOD1 PE=1 SV=2	613	2	148.093	149.464	173.831	165.047	132.392	110.987	129.329	153.833	160.323	153.782	151.58	141.951	148.095	136.299	148.007	132.555	-0.109384	0.819711	0.34708		-0.193705	1.3297	0.179589		-0.357965	1.63945	0.0514743		-0.0256383	0.160508	0.916322
sp|Q8NFC6|BD1L1_HUMAN	BOD1L1	Biorientation of chromosomes in cell division protein 1-like 1 OS=Homo sapiens OX=9606 GN=BOD1L1 PE=1 SV=2	3234	11	405.11	389.028	393.577	402.516	405.218	371.011	386.735	377.534	434.998	406.814	402.89	388.25	345.463	366.664	391.563	400.965	-0.0723356	0.405857	0.627858		-0.0419102	0.404045	0.608186		-0.0371348	0.372406	0.560317		0.0296916	0.174955	0.908999
tr|A0A087WZT3|A0A087WZT3_HUMAN	BOLA2B	BolA-like protein 2 OS=Homo sapiens OX=9606 GN=BOLA2B PE=1 SV=2	4739	3	985.473	905.187	824.967	752.165	933.054	740.296	758.05	725.262	773.242	644.683	941.835	700.946	766.278	770.296	748.846	695.899	-0.114389	0.304469	0.714674		-0.225618	1.15075	0.218519		-0.0978192	0.294039	0.639757		-0.275934	1.21753	0.362036
sp|Q53S33|BOLA3_HUMAN	BOLA3	BolA-like protein 3 OS=Homo sapiens OX=9606 GN=BOLA3 PE=1 SV=1	8167	3	582.23	637.854	696.689	604.463	474.775	605.105	556.753	556.348	604.415	582.955	622.007	613.841	676.433	575.521	572.231	634.972	0.0181683	0.0920714	0.912096		-0.0833596	0.503965	0.526399		-0.212257	0.790632	0.241252		-0.114442	0.832213	0.527994
sp|Q14137|BOP1_HUMAN	BOP1	Ribosome biogenesis protein BOP1 OS=Homo sapiens OX=9606 GN=BOP1 PE=1 SV=2	3525	6	777.33	765.741	782.105	773.905	760.942	755.343	709.353	749.918	763.885	757.783	746.385	772.268	741.162	757.932	761.073	763.491	-0.0407888	0.840262	0.336536		-0.0261542	1.70614	0.119575		-0.0632516	0.735714	0.265997		-0.0331013	1.57694	0.247124
tr|A0A087WV86|A0A087WV86_HUMAN	BORA	Protein aurora borealis OS=Homo sapiens OX=9606 GN=BORA PE=1 SV=1	4105	1	43.2658	43.1532	39.8916	42.4737	37.1627	33.5325	35.3808	39.089	42.6375	38.018	36.9901	37.2958	40.527	44.8629	33.2307	35.3273	-0.141325	1.26829	0.189331		-0.170063	0.486896	0.54043		-0.255543	2.00675	0.0288976	+	-0.0811479	0.613526	0.643377
sp|Q969J3|BORC5_HUMAN	BORCS5	BLOC-1-related complex subunit 5 OS=Homo sapiens OX=9606 GN=BORCS5 PE=1 SV=1	7194	3	102.407	95.3778	97.6538	109.017	110.648	91.8641	106.474	101.828	103.577	106.215	101.985	98.0521	107.604	102.867	99.2901	100.559	0.0211511	0.137376	0.868901		-0.00123716	0.00898202	0.989033		0.023932	0.0906492	0.892902		0.0405232	0.367086	0.790839
sp|Q96GS4|BORC6_HUMAN	BORCS6	BLOC-1-related complex subunit 6 OS=Homo sapiens OX=9606 GN=BORCS6 PE=1 SV=2	4269	1	13.9667	19.9876	19.143	21.2127	19.7161	18.7518	20.4623	15.5281	16.2255	18.7616	18.8942	25.1858	21.6074	19.8907	18.4273	23.7491	0.244983	0.633343	0.453189		0.164893	0.415583	0.598129		0.0974135	0.276066	0.660574		-0.128735	0.342505	0.807254
sp|Q96B45|BORC7_HUMAN	BORCS7	BLOC-1-related complex subunit 7 OS=Homo sapiens OX=9606 GN=BORCS7 PE=3 SV=2	7696	1	30.1486	23.9567	30.7067	31.6224	22.8503	23.1188	22.3915	22.5322	31.0409	29.1759	30.2837	23.1514	27.3235	25.7058	36.0954	31.6291	-0.113077	0.320553	0.701831		0.0920487	0.208165	0.780768		-0.344928	1.49928	0.0661215		-0.0826932	0.185482	0.902557
sp|P07738|PMGE_HUMAN	BPGM	Bisphosphoglycerate mutase OS=Homo sapiens OX=9606 GN=BPGM PE=1 SV=2	6026	1	13.9741	15.9376	13.9873	14.8631	15.4137	18.909	16.319	15.2172	11.6332	14.7599	17.4274	12.587	14.7761	17.4145	13.1208	17.1392	0.0127585	0.0289102	0.970938		0.103721	0.281756	0.712586		0.197186	0.85956	0.212409		-0.0908826	0.264166	0.858855
sp|Q86WA6|BPHL_HUMAN	BPHL	Valacyclovir hydrolase OS=Homo sapiens OX=9606 GN=BPHL PE=1 SV=1	4268	2	123.299	111.474	115.272	124.193	101.802	135.01	120.6	126.174	123.418	120.28	132.471	151.201	139.418	131.509	122.702	139.435	0.24973	1.63746	0.117776		0.145847	1.03709	0.254109		-0.00110295	0.00278865	0.996521		0.0576644	0.61368	0.643296
sp|O95861|BPNT1_HUMAN	BPNT1	3'(2'),5'-bisphosphate nucleotidase 1 OS=Homo sapiens OX=9606 GN=BPNT1 PE=1 SV=1	1946	5	334.64	348.103	358.15	367.864	374.279	380.812	369.393	342.682	342.518	329.892	383.064	355.274	371.557	392.415	383.364	378.607	0.0712352	0.787247	0.364322		0.128467	1.82783	0.104688		0.0906513	1.33431	0.0876299		-0.0571172	0.791878	0.545329
sp|Q12830|BPTF_HUMAN	BPTF	Nucleosome-remodeling factor subunit BPTF OS=Homo sapiens OX=9606 GN=BPTF PE=1 SV=3	114	12	900.937	878.498	921.02	857.82	915.354	894.828	925.345	825.015	874.463	786.865	842.344	849.393	865.121	828.348	826.048	864.924	-0.0613452	1.1869	0.214484		-0.0829145	1.34739	0.17606		0.0360507	0.632813	0.326067		-0.102949	0.894151	0.500809
tr|A0A2R8Y8E0|A0A2R8Y8E0_HUMAN	BRAF	Serine/threonine-protein kinase B-raf OS=Homo sapiens OX=9606 GN=BRAF PE=1 SV=1	4043	3	169.645	171.219	169.457	187.722	184.366	162	157.53	155.975	173.105	167.558	189.521	178.33	161.774	181.701	182.088	166.079	0.0149926	0.068177	0.937413		0.0173876	0.112076	0.880944		-0.0572387	0.285707	0.649037		-0.0760954	0.604041	0.646635
sp|Q7Z569|BRAP_HUMAN	BRAP	BRCA1-associated protein OS=Homo sapiens OX=9606 GN=BRAP PE=1 SV=2	2736	7	224.719	222.225	236.565	230.361	198.281	200.055	197.897	217.937	241.792	221.502	212.318	203.429	217.755	219.379	235.914	220.253	-0.11375	1.4766	0.141695		-0.0212864	0.20504	0.782699		-0.200671	2.83657	0.00737759	+	-0.00990331	0.0661963	0.964958
sp|Q6PJG6|BRAT1_HUMAN	BRAT1	BRCA1-associated ATM activator 1 OS=Homo sapiens OX=9606 GN=BRAT1 PE=1 SV=2	1657	8	274.35	291.077	278.572	278.064	228.568	224.524	236.088	277.673	292.236	261.954	272.309	272.583	263.56	283.667	268.593	266.426	-0.0576975	1.18675	0.214322		-0.0399364	0.507851	0.522771		-0.288115	3.54833	0.0021704	+	-0.0177767	0.128046	0.935523
sp|P38398-7|BRCA1_HUMAN	BRCA1	Isoform 7 of Breast cancer type 1 susceptibility protein OS=Homo sapiens OX=9606 GN=BRCA1	4430	4	168.764	156.886	182.511	177.161	152.944	144.252	154.502	165.125	176.852	155.746	190.668	178.422	173.83	170.458	196.502	181.508	0.0802357	0.597983	0.474588		0.0935557	0.548418	0.495293		-0.184702	1.61766	0.0534116		-0.04601	0.259966	0.861964
sp|P51587|BRCA2_HUMAN	BRCA2	Breast cancer type 2 susceptibility protein OS=Homo sapiens OX=9606 GN=BRCA2 PE=1 SV=3	601	11	826.679	840.562	832.101	890.691	769.634	746.757	791.692	831.806	771.404	836.298	837.094	821.826	737.789	810.943	851.432	794.523	-0.086781	0.579882	0.488991		-0.0493977	0.578905	0.475838		-0.139341	1.96479	0.0303538	+	-0.0600077	0.586088	0.657995
sp|P46736|BRCC3_HUMAN	BRCC3	Lys-63-specific deubiquitinase BRCC36 OS=Homo sapiens OX=9606 GN=BRCC3 PE=1 SV=2	5505	3	351.56	332.756	351.654	342.377	399.678	352.836	330.659	357.773	363.398	362.816	403.14	406.941	347.585	351.446	373.358	375.93	0.159994	0.809894	0.35158		0.090281	1.11346	0.228429		0.0632322	0.287185	0.647163		0.0687831	1.52628	0.263263
sp|O95696|BRD1_HUMAN	BRD1	Bromodomain-containing protein 1 OS=Homo sapiens OX=9606 GN=BRD1 PE=1 SV=1	5641	4	353.458	345.676	363.133	363.915	349.133	349.892	358.574	349.55	339.222	355.924	390.442	395.447	370.147	350.387	355.69	377.928	0.111799	1.41412	0.156245		0.0187957	0.186099	0.799056		-0.0161123	0.311507	0.62219		-0.0339988	0.573766	0.662981
tr|A0A0G2JK44|A0A0G2JK44_HUMAN	BRD2	Bromodomain-containing protein 2 OS=Homo sapiens OX=9606 GN=BRD2 PE=1 SV=1	565	5	315.723	335.771	352.578	315.538	312.309	282.189	314.474	315.82	324.371	334.142	315.906	323.547	295.327	326.857	311.698	318.879	-0.0818786	0.69633	0.41342		-0.0465341	0.468022	0.556282		-0.122948	0.907102	0.194136		-0.0214037	0.181978	0.904762
sp|Q15059|BRD3_HUMAN	BRD3	Bromodomain-containing protein 3 OS=Homo sapiens OX=9606 GN=BRD3 PE=1 SV=1	565	4	144.315	140.067	133.999	136.586	143.523	138.969	148.982	119	131.032	145.162	145.443	139.128	142.402	131.261	139.149	127.244	0.0371028	0.574858	0.492962		-0.0662871	0.657365	0.429065		0.0518851	0.636032	0.324664		-0.0789944	0.353102	0.800836
sp|O60885|BRD4_HUMAN	BRD4	Bromodomain-containing protein 4 OS=Homo sapiens OX=9606 GN=BRD4 PE=1 SV=2	565	8	1764.04	1807.95	1826.83	1824.96	1715.67	1695.99	1730.06	1752.19	1757.16	1801.37	1772.8	1766.95	1682.44	1708.52	1725.01	1656.59	-0.0533293	0.836311	0.338467		-0.0900886	1.80762	0.106554		-0.0753707	2.45142	0.0133352	+	-0.0287782	0.791982	0.545523
sp|Q9NPI1|BRD7_HUMAN	BRD7	Bromodomain-containing protein 7 OS=Homo sapiens OX=9606 GN=BRD7 PE=1 SV=1	5854	4	478.388	500.868	532.732	554.916	438.984	461.882	477.142	469.104	508.461	521.632	538.402	527.731	428.898	463.192	443.578	469.924	-0.0573657	0.184192	0.825636		-0.169331	1.52421	0.14389		-0.168369	1.44651	0.0717293		-0.0473803	0.29537	0.83604
sp|Q9H0E9-2|BRD8_HUMAN	BRD8	Isoform 2 of Bromodomain-containing protein 8 OS=Homo sapiens OX=9606 GN=BRD8	3717	3	473.28	485.138	502.595	507.461	483.142	438.059	483.571	475.198	499.759	501.94	474.037	470.464	432.117	455.727	495.15	475.085	-0.10161	0.908371	0.308541		-0.0503719	0.526138	0.51157		-0.0726789	0.580359	0.364678		0.000646447	0.00621647	0.996852
sp|Q9H8M2|BRD9_HUMAN	BRD9	Bromodomain-containing protein 9 OS=Homo sapiens OX=9606 GN=BRD9 PE=1 SV=2	7152	1	570.862	441.225	496.956	517.217	672.735	805.419	524.695	490.084	575.394	499.018	616.263	532.883	609.247	590.895	641.089	539.284	0.213495	1.03967	0.263016		0.223521	1.05345	0.249906		0.38245	0.814466	0.23083		0.0442543	0.158336	0.91897
sp|Q92994|TF3B_HUMAN	BRF1	Transcription factor IIIB 90 kDa subunit OS=Homo sapiens OX=9606 GN=BRF1 PE=1 SV=1	3050	6	494.706	504.641	536.001	515.951	449.299	433.843	441.439	490.414	486.409	488.854	478.013	458.437	435.108	469.597	491.663	471.06	-0.166109	1.54558	0.131935		-0.102823	1.58966	0.133838		-0.21547	3.02165	0.00609137	+	-0.0693	1.17572	0.381029
tr|A0A5F9ZHY7|A0A5F9ZHY7_HUMAN	BRI3BP	BRI3-binding protein OS=Homo sapiens OX=9606 GN=BRI3BP PE=4 SV=1	8029	1	16.5525	14.8486	12.9766	12.737	10.5917	11.8381	14.8738	13.0848	12.6946	15.2915	16.9903	20.3931	17.4243	10.6686	15.0105	16.2914	0.359053	1.49497	0.13904		-0.0444273	0.0735243	0.923014		-0.205864	0.522588	0.408287		-0.0572995	0.18188	0.904613
sp|Q9BX63|FANCJ_HUMAN	BRIP1	Fanconi anemia group J protein OS=Homo sapiens OX=9606 GN=BRIP1 PE=1 SV=2	4445	2	76.1353	75.5832	80.7291	82.3317	72.6281	68.7848	72.0045	83.0396	68.2506	73.8381	86.867	79.7031	76.7037	75.1047	79.2067	63.8605	0.0422881	0.271275	0.743407		-0.118809	0.479931	0.546565		-0.145057	1.8566	0.0354765	+	-0.0722898	0.319078	0.823344
sp|Q8TDN6|BRX1_HUMAN	BRIX1	Ribosome biogenesis protein BRX1 homolog OS=Homo sapiens OX=9606 GN=BRIX1 PE=1 SV=2	3909	9	1397.91	1382.93	1323.12	1327.59	1299.59	1285.54	1316.67	1328.79	1314.1	1383.36	1354.09	1371.4	1267.82	1329.78	1309.17	1388.16	-0.029164	0.284598	0.730563		-0.0166004	0.198113	0.789115		-0.0618301	1.31508	0.0906182		-0.0168167	0.218526	0.883802
sp|Q8WUW1-2|BRK1_HUMAN	BRK1	Isoform 2 of Protein BRICK1 OS=Homo sapiens OX=9606 GN=BRK1	5717	4	353.338	304.783	312.61	314.963	372.111	318.432	343.467	308.228	335.728	292.749	360.181	343.398	379.749	363.532	351.619	314.162	0.169122	1.35148	0.169589		0.0937736	0.518602	0.515437		0.100202	0.55097	0.386013		-0.0417761	0.219347	0.882831
tr|G5E9I4|G5E9I4_HUMAN	BRMS1	Breast cancer metastasis suppressor 1, isoform CRA_c OS=Homo sapiens OX=9606 GN=BRMS1 PE=1 SV=1	2802	5	681.957	719.376	677.303	713.333	666.557	680.338	650.009	699.565	722.318	707.227	662.495	673.354	654.314	693.634	686.451	687.76	-0.0729484	1.40866	0.156715		-0.0176221	0.310951	0.687349		-0.0682211	1.17521	0.117318		0.0243876	0.405043	0.763818
sp|Q5PSV4|BRM1L_HUMAN	BRMS1L	Breast cancer metastasis-suppressor 1-like protein OS=Homo sapiens OX=9606 GN=BRMS1L PE=1 SV=2	7526	1	47.762	44.6387	45.0337	53.8814	48.7212	47.8417	38.1528	48.5649	43.9094	45.9585	48.5741	39.8155	46.6283	40.3757	43.1524	46.891	-0.0888299	0.340667	0.684074		-0.136325	0.730645	0.386366		-0.0955352	0.291404	0.642153		-0.0488124	0.262306	0.860027
sp|Q5VW32|BROX_HUMAN	BROX	BRO1 domain-containing protein BROX OS=Homo sapiens OX=9606 GN=BROX PE=1 SV=1	3268	2	436.917	398.389	440.604	441.227	434.38	428.526	428.213	474.324	450.351	463.371	405.479	368.172	396.915	416.619	435.026	400.728	-0.137689	1.20803	0.207704		-0.0398173	0.339401	0.662252		0.00492121	0.0457183	0.945666		0.109062	1.29615	0.332335
tr|A0A5F9ZH11|A0A5F9ZH11_HUMAN	BRPF1	Peregrin (Fragment) OS=Homo sapiens OX=9606 GN=BRPF1 PE=4 SV=1	5641	5	218.421	196.338	232.789	225.1	226.704	221.114	231.086	221.299	226.315	216.301	240.291	237.19	218.335	213.993	216.175	240.02	0.0899464	0.608197	0.469484		0.0351293	0.180459	0.804474		0.0555	0.415562	0.515256		0.0232798	0.153388	0.923216
sp|Q9ULD4|BRPF3_HUMAN	BRPF3	Bromodomain and PHD finger-containing protein 3 OS=Homo sapiens OX=9606 GN=BRPF3 PE=1 SV=2	5641	2	60.5282	57.7275	60.9927	57.2227	64.0757	70.1044	52.752	56.2905	53.1866	52.1734	59.8313	58.28	64.5799	58.8053	58.4909	57.1727	0.041973	0.334822	0.688906		-0.0231943	0.36987	0.6395		0.0664801	0.193511	0.76058		-0.133933	1.51052	0.266333
sp|Q9NSI6|BRWD1_HUMAN	BRWD1	Bromodomain and WD repeat-containing protein 1 OS=Homo sapiens OX=9606 GN=BRWD1 PE=1 SV=4	2678	9	265.993	297.941	307.943	301.942	305.739	294.444	304.821	314.252	297.281	281.06	327.186	297.66	295.625	287.957	284.754	312.992	0.0650107	0.42256	0.613396		0.00972763	0.0528775	0.942097		0.0419146	0.340293	0.591915		0.020705	0.114424	0.943991
sp|P35613|BASI_HUMAN	BSG	Basigin OS=Homo sapiens OX=9606 GN=BSG PE=1 SV=2	2417	12	573.39	605.479	570.202	534.326	631.927	659.139	684.284	566.827	554.431	541.296	534.055	564.326	583.807	591.132	537.8	507.622	-0.0253605	0.186487	0.823323		-0.0669285	0.370258	0.639671		0.206615	2.04721	0.0269682	+	-0.0415854	0.432083	0.74615
sp|Q10589|BST2_HUMAN	BST2	Bone marrow stromal antigen 2 OS=Homo sapiens OX=9606 GN=BST2 PE=1 SV=1	7282	1	18.4187	17.0169	15.6645	18.71	12.6542	12.7466	12.0288	11.5728	14.22	15.8415	14.3046	12.8114	22.0026	14.1858	13.2479	14.4363	-0.129335	0.190161	0.821268		-0.319891	2.16971	0.072841		-0.481121	2.79168	0.00823154	+	-0.339072	0.965066	0.465877
tr|A0A0A0MTH9|A0A0A0MTH9_HUMAN	BTAF1	TATA-binding protein-associated factor 172 OS=Homo sapiens OX=9606 GN=BTAF1 PE=1 SV=1	991	13	758.661	744.407	763.183	774.237	900.39	827.392	842.291	816.381	745	727.249	807.877	763.596	674.981	763.031	825.048	791.577	-0.0254904	0.112325	0.892959		0.0608953	0.712785	0.395154		0.171725	1.47138	0.0686356		0.00355633	0.0216887	0.990397
sp|Q9BSF8-2|BTBDA_HUMAN	BTBD10	Isoform 2 of BTB/POZ domain-containing protein 10 OS=Homo sapiens OX=9606 GN=BTBD10	4830	4	124.097	130.695	146.967	138.927	134.975	130.359	128.111	144.883	141.666	154.952	160.467	147.682	136.574	156.54	146.59	142.367	0.132945	0.716752	0.39897		0.137438	1.02468	0.258189		-0.041014	0.288341	0.645691		0.124528	0.931404	0.484456
sp|A6QL63|BTBDB_HUMAN	BTBD11	Ankyrin repeat and BTB/POZ domain-containing protein BTBD11 OS=Homo sapiens OX=9606 GN=BTBD11 PE=2 SV=3	803	4	152.938	142.81	158.732	165.048	191.362	177.211	186.633	139.113	136.597	139.123	183.743	165.666	198.798	178.39	167.17	151.213	0.236626	1.1754	0.216937		0.0951803	0.49596	0.53242		0.258195	2.25507	0.0186838	+	-0.161616	1.4774	0.280934
sp|Q9Y2F9|BTBD3_HUMAN	BTBD3	BTB/POZ domain-containing protein 3 OS=Homo sapiens OX=9606 GN=BTBD3 PE=2 SV=1	768	1	86.4474	80.8799	85.7839	81.6561	69.1002	76.4761	80.6368	73.6459	84.7278	84.6151	92.712	80.2364	77.8331	83.345	83.6902	77.646	-0.0053356	0.020947	0.978697		-0.0374459	0.363707	0.643619		-0.152755	0.881337	0.203389		-0.0496826	0.263727	0.859515
sp|Q9P203|BTBD7_HUMAN	BTBD7	BTB/POZ domain-containing protein 7 OS=Homo sapiens OX=9606 GN=BTBD7 PE=1 SV=3	2035	1	38.3029	41.9335	40.6576	46.162	34.3707	34.3962	40.1454	37.2185	41.1768	45.4931	29.625	36.896	40.2229	41.083	34.6426	34.2504	-0.239515	0.697217	0.412929		-0.189877	0.847717	0.324472		-0.202726	1.02341	0.156887		-0.0177805	0.0609166	0.969506
sp|Q96Q07|BTBD9_HUMAN	BTBD9	BTB/POZ domain-containing protein 9 OS=Homo sapiens OX=9606 GN=BTBD9 PE=1 SV=2	5520	1	17.3266	22.5302	20.8969	18.7364	28.5848	32.9917	36.2246	20.6139	17.1432	19.9275	22.3642	20.651	20.3052	22.6698	27.1258	18.4129	0.092922	0.425521	0.610742		0.183556	0.41372	0.599763		0.714612	2.38902	0.0153696	+	-0.0448238	0.14391	0.928603
sp|P43251-2|BTD_HUMAN	BTD	Isoform 2 of Biotinidase OS=Homo sapiens OX=9606 GN=BTD	7527	2	196.428	195.854	190.353	178.361	181.409	165.436	182.74	171.5	210.073	196.188	242.221	252.954	223.385	214.542	211.219	218.719	0.33143	2.0648	0.079046		0.176212	2.14079	0.0757121		-0.108377	0.885696	0.201744		0.0136312	0.0492092	0.97797
sp|P20290|BTF3_HUMAN	BTF3	Transcription factor BTF3 OS=Homo sapiens OX=9606 GN=BTF3 PE=1 SV=1	2835	7	545.499	512.363	579.271	583.33	420.285	451.944	437.597	520.434	539.802	538.833	553.603	514.014	500.55	488.483	528.582	504.761	-0.0860989	0.650801	0.440862		-0.128811	1.18317	0.21092		-0.345118	2.85065	0.00723207	+	-0.0568288	0.530648	0.687066
sp|Q96K17|BT3L4_HUMAN	BTF3L4	Transcription factor BTF3 homolog 4 OS=Homo sapiens OX=9606 GN=BTF3L4 PE=1 SV=1	2835	3	293.643	306.526	326.842	332.253	301.626	293.477	307.422	326.29	307.98	321.674	300.485	319.241	293.879	311.02	315.066	304.85	-0.0470167	0.367665	0.662823		-0.01915	0.164048	0.822212		-0.0639942	0.635732	0.324789		0.0187932	0.145884	0.927144
sp|P62324|BTG1_HUMAN	BTG1	Protein BTG1 OS=Homo sapiens OX=9606 GN=BTG1 PE=1 SV=1	5504	1	27.3197	29.0793	20.1378	22.6808	41.6368	44.1985	42.1835	25.1839	25.2564	33.1572	31.5133	31.1197	32.5326	25.5773	23.5048	25.7693	0.369897	1.26492	0.189902		0.0224963	0.0600979	0.935921		0.797517	2.22796	0.0197084	+	0.17083	0.411323	0.759488
sp|Q14201-2|BTG3_HUMAN	BTG3	Isoform 2 of Protein BTG3 OS=Homo sapiens OX=9606 GN=BTG3	676	1	65.643	56.4321	59.9923	54.873	38.5447	42.1454	47.6447	60.8328	55.1336	51.1261	50.9646	57.4597	57.529	46.8149	52.5747	60.3006	-0.0975626	0.541873	0.517372		-0.158505	0.562076	0.485677		-0.4716	1.85214	0.0357796	+	-0.0890607	0.411456	0.759492
sp|Q7KYR7-1|BT2A1_HUMAN	BTN2A1	Isoform 2 of Butyrophilin subfamily 2 member A1 OS=Homo sapiens OX=9606 GN=BTN2A1	5481	3	341.007	359.779	363.573	348.247	339.146	362.47	370.057	363.363	366.961	372.373	313.353	319.441	361.166	352.582	350.099	353.585	-0.0944836	0.559772	0.503553		-0.00389084	0.0613008	0.934237		0.0160215	0.133417	0.835806		0.0581118	1.17708	0.381449
sp|P78410|BT3A2_HUMAN	BTN3A2	Butyrophilin subfamily 3 member A2 OS=Homo sapiens OX=9606 GN=BTN3A2 PE=1 SV=2	4038	1	7.6703	8.49835	10.1334	8.82362	6.80136	4.40945	10.3116	8.80028	5.26988	10.1189	7.85568	9.78508	8.44811	8.75661	7.49564	5.26859	-0.0129046	0.0352255	0.963634		-0.31594	0.553152	0.491474		-0.369681	0.390596	0.540866		-0.169121	0.207556	0.89254
sp|O00478|BT3A3_HUMAN	BTN3A3	Butyrophilin subfamily 3 member A3 OS=Homo sapiens OX=9606 GN=BTN3A3 PE=1 SV=1	4038	2	373.714	396.599	395.178	379.364	357.967	388.171	363.326	381.465	398.597	373.99	378.105	391.929	378.572	378.384	389.839	408.153	-0.0122763	0.172819	0.834184		0.0216879	0.219233	0.769962		-0.0629974	0.660108	0.310099		-0.00576487	0.0578418	0.972343
sp|Q9Y297|FBW1A_HUMAN	BTRC	F-box/WD repeat-containing protein 1A OS=Homo sapiens OX=9606 GN=BTRC PE=1 SV=1	6685	3	112.37	118.532	105.714	75.7927	98.384	85.5519	99.8785	105.419	111.651	102.704	90.3168	84.3015	96.3494	94.9461	92.4272	97.4733	-0.172443	0.478889	0.567168		-0.0985747	0.261271	0.730543		-0.10692	0.26574	0.674929		0.0677501	0.168813	0.911099
sp|O43683|BUB1_HUMAN	BUB1	Mitotic checkpoint serine/threonine-protein kinase BUB1 OS=Homo sapiens OX=9606 GN=BUB1 PE=1 SV=1	2773	7	384.317	383.272	384.722	423.459	202.064	214.529	211.113	367.472	381.104	380.801	405.296	399.197	345.222	389.537	414.043	418.59	-0.0421423	0.191972	0.819931		0.049017	0.452885	0.56849		-0.912009	5.29067	0	+	-0.0643906	0.764922	0.559238
sp|O60566-3|BUB1B_HUMAN	BUB1B	Isoform 3 of Mitotic checkpoint serine/threonine-protein kinase BUB1 beta OS=Homo sapiens OX=9606 GN=BUB1B	782	11	1190.91	1192.5	1222.3	1204	989	921.531	962.087	1089.84	1134.53	1119.13	1240.81	1243.42	1140.37	1199.66	1212.67	1173.33	0.00582744	0.0450594	0.955961		-0.00873134	0.202124	0.785695		-0.329076	2.31049	0.0172534	+	-0.109676	1.99255	0.139506
sp|O43684|BUB3_HUMAN	BUB3	Mitotic checkpoint protein BUB3 OS=Homo sapiens OX=9606 GN=BUB3 PE=1 SV=1	4124	6	227.414	201.517	237.018	225.278	212.703	194.617	198.229	215.892	211.587	262.002	213.389	173.656	180.325	213.508	160.226	174.817	-0.239792	1.00158	0.274325		-0.29315	0.904518	0.303072		-0.141016	1.11285	0.131763		0.0404814	0.132121	0.93419
sp|Q9BRD0|BUD13_HUMAN	BUD13	BUD13 homolog OS=Homo sapiens OX=9606 GN=BUD13 PE=1 SV=1	5055	6	286.849	285.195	287.13	291.062	289.768	287.146	293.815	271.154	281.89	294.159	294.007	295.704	286.497	324.399	290.917	285.919	0.0223571	0.605976	0.47039		0.0608434	0.400445	0.611835		0.0133792	0.50213	0.427054		-0.0268707	0.289891	0.840729
sp|O43709-3|BUD23_HUMAN	BUD23	Isoform 3 of Probable 18S rRNA (guanine-N(7))-methyltransferase OS=Homo sapiens OX=9606 GN=BUD23	1672	3	157.923	171.976	174.896	148.198	134.928	138.574	133.933	161.123	169.073	164.139	142.994	156.316	164.377	149.992	142.878	155.945	-0.0780535	0.417655	0.616413		-0.123627	0.902956	0.303861		-0.26241	1.82624	0.0372975	+	0.0163793	0.0986106	0.952763
sp|P41223|BUD31_HUMAN	BUD31	Protein BUD31 homolog OS=Homo sapiens OX=9606 GN=BUD31 PE=1 SV=2	2858	1	176.342	195.479	187.689	171.551	197.843	198.322	174.967	203.003	180.679	182.319	197.64	206.417	195.919	201.772	205.207	205.765	0.131472	1.31831	0.175602		0.162175	1.53118	0.142282		0.058335	0.325772	0.606419		0.0457054	0.26647	0.857584
sp|Q13895|BYST_HUMAN	BYSL	Bystin OS=Homo sapiens OX=9606 GN=BYSL PE=1 SV=3	1988	6	766.805	746.831	767.355	774.005	638.668	614.602	651.55	729.205	736.396	745.193	714.52	702.513	699.915	733.682	732.869	699.843	-0.114077	3.28107	0.0205926	+	-0.0810558	1.31574	0.182779		-0.266771	2.54027	0.0118239	+	-0.0514961	1.80155	0.183744
sp|Q7L1Q6-3|BZW1_HUMAN	BZW1	Isoform 3 of Basic leucine zipper and W2 domain-containing protein 1 OS=Homo sapiens OX=9606 GN=BZW1	1406	12	4014.54	3925.24	4173.17	4145.42	4789.54	4967.78	4712.81	3776.28	3660.79	3946.78	4109.75	3888.51	3979.22	4016.34	3929.11	3844.96	-0.0257515	0.348928	0.675639		-0.0483185	0.855793	0.32111		0.247023	3.16724	0.00520245	+	-0.0994038	1.19765	0.370878
sp|Q9Y6E2|BZW2_HUMAN	BZW2	Basic leucine zipper and W2 domain-containing protein 2 OS=Homo sapiens OX=9606 GN=BZW2 PE=1 SV=1	1406	6	2559.46	2603.04	2571.13	2691.98	2355.19	2490.06	2376.03	2525.18	2331.53	2571.51	2453.29	2518.56	2403.79	2608.51	2440.88	2570.7	-0.0842342	1.58487	0.124862		-0.0375139	0.47207	0.553104		-0.114918	1.6646	0.0495714	+	-0.0750172	0.659657	0.616758
sp|Q9H3H3|CK068_HUMAN	C11orf68	UPF0696 protein C11orf68 OS=Homo sapiens OX=9606 GN=C11orf68 PE=1 SV=3	6650	8	967.105	980.563	1009.95	1029.34	1093.5	1011.42	974.727	950.788	990.136	991.343	1076.96	1042.71	999.719	1051.21	935.923	1002.44	0.0607749	0.734509	0.390663		-0.00151466	0.00918674	0.98888		0.0412777	0.302505	0.630967		-0.028074	0.432373	0.746024
sp|E9PRG8|CK098_HUMAN	C11orf98	Uncharacterized protein C11orf98 OS=Homo sapiens OX=9606 GN=C11orf98 PE=4 SV=2	2868	1	33.4174	31.3553	37.6683	48.7251	30.817	32.909	30.7872	36.4847	39.421	32.1316	32.8295	37.2478	36.8187	34.1273	34.9358	35.5546	-0.065969	0.163069	0.845		-0.0949416	0.260475	0.731219		-0.241985	0.737494	0.265488		-0.0534149	0.119398	0.940569
sp|Q9HB07|MYG1_HUMAN	C12orf10	UPF0160 protein MYG1, mitochondrial OS=Homo sapiens OX=9606 GN=C12orf10 PE=1 SV=2	2555	8	1673.13	1712.95	1737.63	1729.41	1568.57	1563.07	1567.39	1665.28	1637.42	1695.34	1735.66	1605.17	1581.85	1649.42	1649.17	1642.4	-0.0633339	0.579509	0.489132		-0.0567735	1.76898	0.110592		-0.12921	2.80258	0.00815354	+	-0.0403538	1.02767	0.44352
sp|Q8N999|CL029_HUMAN	C12orf29	Uncharacterized protein C12orf29 OS=Homo sapiens OX=9606 GN=C12orf29 PE=1 SV=2	3929	2	778.981	787.75	776.263	789.828	666.076	678.883	698.816	757.806	693.073	752.089	727.627	701.054	671.166	719.145	737.534	694.957	-0.162888	1.43727	0.152493		-0.12738	1.52201	0.143683		-0.201432	2.22098	0.0199547	+	-0.094106	0.831952	0.527145
sp|Q9NQ89|CL004_HUMAN	C12orf4	Protein C12orf4 OS=Homo sapiens OX=9606 GN=C12orf4 PE=1 SV=1	4474	4	100.386	92.8664	89.4533	96.8156	88.2466	95.5325	95.7868	96.7043	94.209	84.8317	110.582	112.172	104.005	100.266	111.276	111.368	0.199668	1.99624	0.0811085		0.18161	1.35636	0.173321		-0.0256346	0.186696	0.769143		-0.0467382	0.271548	0.852983
tr|F5H7W8|F5H7W8_HUMAN	C12orf43	Chromosome 12 open reading frame 43 OS=Homo sapiens OX=9606 GN=C12orf43 PE=1 SV=2	1575	5	109.911	120.53	122.076	113.35	123.331	138.819	123.797	110.777	115.639	120.337	115.436	107.612	118.199	116.539	117.108	111.527	-0.0338563	0.249391	0.76431		-0.0165578	0.146752	0.844883		0.142666	0.971862	0.172488		-0.0104508	0.0744548	0.964175
tr|A0A087WT30|A0A087WT30_HUMAN	C12orf45	Uncharacterized protein C12orf45 OS=Homo sapiens OX=9606 GN=C12orf45 PE=1 SV=2	5102	4	136.331	137.24	142.036	138.295	89.0941	83.0424	89.165	138.863	128.034	138.806	127.14	114.996	123.021	125.211	118.078	130.654	-0.187153	1.4148	0.156524		-0.152837	1.23631	0.199888		-0.669498	3.08658	0.00554945	+	-0.0350354	0.329095	0.816837
sp|Q99622|C10_HUMAN	C12orf57	Protein C10 OS=Homo sapiens OX=9606 GN=C12orf57 PE=1 SV=1	4886	2	47.8071	44.4525	46.148	76.7639	39.5301	54.5087	50.5801	45.4224	44.5728	57.8354	45.9271	45.3707	69.2209	52.3945	53.8901	56.2348	0.001725	0.00208258	0.99815		0.0479199	0.0893978	0.905483		-0.133044	0.228141	0.719223		-0.0985397	0.170576	0.911006
sp|Q9H3J6|CL065_HUMAN	C12orf65	Probable peptide chain release factor C12orf65, mitochondrial OS=Homo sapiens OX=9606 GN=C12orf65 PE=2 SV=1	8191	1	22.5651	29.6605	28.3643	25.5974	25.499	21.7348	25.6175	25.0937	21.6964	24.3413	21.1634	28.7201	26.1524	26.3846	20.9338	27.0682	-0.0704856	0.168473	0.838421		-0.0999676	0.272812	0.72071		-0.124818	0.473278	0.455095		-0.157948	0.686505	0.603081
tr|J3KNH0|J3KNH0_HUMAN	C12orf66	KICSTOR complex protein C12orf66 OS=Homo sapiens OX=9606 GN=C12orf66 PE=1 SV=2	7376	1	74.3627	73.4898	84.8584	78.8724	75.2647	76.4666	82.3121	73.9323	80.8091	85.4514	92.2983	87.2805	70.2716	75.2274	84.0686	93.8259	0.0891264	0.263101	0.752275		0.111762	0.446087	0.575066		0.00346059	0.0188003	0.976962		0.0394336	0.19696	0.896718
sp|Q69YU5|CL073_HUMAN	C12orf73	Uncharacterized protein C12orf73 OS=Homo sapiens OX=9606 GN=C12orf73 PE=3 SV=2	7763	1	20.1234	27.863	26.1945	29.0083	21.8637	25.849	25.7546	28.1635	31.4689	33.9173	20.1543	25.4276	25.3044	19.7678	21.875	23.4262	-0.120948	0.309687	0.711121		-0.239719	0.828871	0.333095		-0.0654132	0.175822	0.783537		0.283353	0.979452	0.459836
tr|F8VQD4|F8VQD4_HUMAN	C12orf75	Chromosome 12 open reading frame 75 (Fragment) OS=Homo sapiens OX=9606 GN=C12orf75 PE=1 SV=2	5220	3	201.892	188.54	201.739	174.813	185.128	164.881	172.741	186.307	229.009	188.095	189.394	174.281	191.607	200.598	238.991	222.445	-0.0497038	0.316575	0.704372		0.201548	1.04628	0.252207		-0.13717	0.972842	0.172108		0.0648267	0.226924	0.879126
sp|Q6ZRI6|CO039_HUMAN	C15orf39	Uncharacterized protein C15orf39 OS=Homo sapiens OX=9606 GN=C15orf39 PE=1 SV=3	1590	6	541.458	493.092	551.022	558.477	505.454	541.979	515.95	522.54	509.439	548.449	508.068	529.784	480.195	515.258	546.101	544.817	-0.0825631	0.667708	0.43003		-0.000500328	0.00337459	0.995231		-0.0395625	0.329326	0.60318		-0.0239757	0.180761	0.90469
sp|Q8WUR7-3|CO040_HUMAN	C15orf40	Isoform 3 of UPF0235 protein C15orf40 OS=Homo sapiens OX=9606 GN=C15orf40	5978	1	78.5139	83.2247	81.5528	80.8582	78.3936	79.6884	70.682	84.1897	75.093	73.1474	72.8696	88.8923	85.7894	74.2461	87.9382	81.5436	0.0211196	0.0783789	0.925811		0.000520193	0.00222936	0.996214		-0.0894559	0.628931	0.32846		-0.0672292	0.403765	0.764512
tr|H3BS01|H3BS01_HUMAN	C15orf41	Protein C15orf41 OS=Homo sapiens OX=9606 GN=C15orf41 PE=1 SV=1	6398	2	35.595	37.5543	35.487	44.7718	29.9251	36.6149	30.4931	37.3789	31.7182	34.5964	39.6612	29.3431	29.342	30.3609	28.8608	33.8062	-0.234728	0.61043	0.468745		-0.303096	1.48184	0.150777		-0.24521	0.966477	0.173616		-0.146581	0.658247	0.617912
sp|Q96GQ5|RUS1_HUMAN	C16orf58	RUS1 family protein C16orf58 OS=Homo sapiens OX=9606 GN=C16orf58 PE=1 SV=2	407	5	515.129	573.27	531.595	569.855	576.86	538.648	570.822	502.999	571.46	514.042	546.322	591.616	651.718	592.654	630.865	604.319	0.121619	0.626337	0.459089		0.155343	1.67942	0.123638		0.0389339	0.335928	0.596107		-0.048903	0.286493	0.842885
sp|Q8N3J3|CQ053_HUMAN	C17orf53	Uncharacterized protein C17orf53 OS=Homo sapiens OX=9606 GN=C17orf53 PE=1 SV=1	7427	2	59.7792	55.1067	53.4353	62.4529	58.7297	55.7653	59.9596	59.5122	56.0113	60.0048	51.5961	51.8379	47.4272	62.3373	47.8665	59.0108	-0.196614	1.49858	0.138974		-0.0389113	0.107395	0.884916		0.0135413	0.0796858	0.906097		0.0223855	0.137862	0.9315
tr|J9JIC5|J9JIC5_HUMAN	C17orf75	Protein Njmu-R1 OS=Homo sapiens OX=9606 GN=C17orf75 PE=1 SV=1	2074	2	66.2032	65.7381	63.2129	58.4039	84.6273	67.0275	72.1183	67.0462	75.8374	62.2654	62.5201	62.5095	78.4148	56.3517	61.9193	63.203	0.0906952	0.299663	0.718433		-0.0675315	0.445285	0.57524		0.229602	0.877862	0.205039		0.106353	0.475286	0.719286
sp|Q9BSJ5|CQ080_HUMAN	C17orf80	Uncharacterized protein C17orf80 OS=Homo sapiens OX=9606 GN=C17orf80 PE=2 SV=2	2969	3	130.339	127.575	127.615	136.502	106.957	130.676	133.623	146.608	143.482	129.999	126.747	125.165	117.679	118.922	124.13	142.792	-0.0833704	0.955167	0.290602		-0.0249894	0.103522	0.890419		-0.0831858	0.298187	0.636044		0.100194	0.717516	0.582909
sp|Q32NC0|CR021_HUMAN	C18orf21	UPF0711 protein C18orf21 OS=Homo sapiens OX=9606 GN=C18orf21 PE=1 SV=1	7619	1	75.3633	88.7444	86.2625	90.3383	101.088	90.3737	108.539	97.29	100.262	104.494	82.378	71.435	83.8527	86.854	93.285	79.0216	-0.104648	0.487806	0.559936		0.0205974	0.0801758	0.915835		0.230964	1.12886	0.127952		0.244217	1.7284	0.195187
sp|Q96B23|CR025_HUMAN	C18orf25	Uncharacterized protein C18orf25 OS=Homo sapiens OX=9606 GN=C18orf25 PE=1 SV=3	3116	2	17.7483	15.9076	22.5453	28.8353	20.4126	17.3988	16.1484	21.1826	18.9133	23.2471	21.8194	18.357	19.7363	22.1379	21.0298	20.2818	-0.0552505	0.0965214	0.907927		0.0301981	0.0526645	0.941868		-0.209569	0.418737	0.51209		0.0235955	0.0382892	0.982717
sp|Q8TCD1|CR032_HUMAN	C18orf32	UPF0729 protein C18orf32 OS=Homo sapiens OX=9606 GN=C18orf32 PE=3 SV=1	2077	3	59.7213	60.3479	67.0937	62.07	65.7307	66.9512	59.5463	56.3216	69.206	66.7327	68.4046	65.7864	71.7172	62.2268	65.6316	65.7316	0.140162	1.34802	0.169869		0.051599	0.5027	0.527393		0.0399908	0.243299	0.701838		0.0364208	0.130607	0.934525
sp|Q9NSK7|CS012_HUMAN	C19orf12	Protein C19orf12 OS=Homo sapiens OX=9606 GN=C19orf12 PE=1 SV=3	1197	2	159.06	150.295	133.62	143.447	163.351	144.4	154.246	150.146	150.324	148.531	166.963	134.825	158.276	152.448	174.974	153.117	0.0620142	0.222558	0.791521		0.127692	0.700415	0.403012		0.0720876	0.425023	0.504741		0.0327298	0.234273	0.874601
tr|E7EP72|E7EP72_HUMAN	C19orf25	UPF0449 protein C19orf25 OS=Homo sapiens OX=9606 GN=C19orf25 PE=1 SV=1	7623	1	15.1264	11.0578	17.4025	14.7094	18.3179	12.95	11.3198	13.0257	13.2085	15.855	16.9132	17.4187	12.294	13.9814	15.7922	15.8664	0.0943722	0.169762	0.837808		0.0783571	0.202074	0.785671		-0.0495233	0.069355	0.917196		-0.041953	0.091754	0.955956
sp|Q8N9M1|CS047_HUMAN	C19orf47	Uncharacterized protein C19orf47 OS=Homo sapiens OX=9606 GN=C19orf47 PE=1 SV=1	993	2	35.8256	32.2366	29.7909	34.3027	35.6684	34.3007	39.6217	25.9225	36.753	29.9814	41.9997	32.1015	35.1009	34.3211	28.1628	37.6646	0.134121	0.431212	0.607324		0.00797752	0.0189892	0.977677		0.145671	0.82056	0.227069		-0.108676	0.263548	0.859511
sp|Q9UNZ5|L10K_HUMAN	C19orf53	Leydig cell tumor 10 kDa protein homolog OS=Homo sapiens OX=9606 GN=C19orf53 PE=1 SV=1	6509	2	296.817	277.264	315.099	318.512	281.937	318.744	319.215	337.926	294.851	288.663	369.46	325.86	296.185	319.424	334.133	321.797	0.126726	0.512685	0.540872		0.108685	1.01768	0.261063		0.0221031	0.106348	0.873666		0.0233631	0.0979811	0.953307
sp|Q9NS00|C1GLT_HUMAN	C1GALT1	Glycoprotein-N-acetylgalactosamine 3-beta-galactosyltransferase 1 OS=Homo sapiens OX=9606 GN=C1GALT1 PE=1 SV=1	806	4	106.304	113.844	117.786	98.5486	137.688	131.219	128.945	110.638	122.277	117.46	109.608	118.723	142.486	114.151	121.139	116.794	0.174342	0.587606	0.483531		0.107942	0.804824	0.345676		0.284129	2.02173	0.0280075	+	0.100141	0.66484	0.612977
sp|Q96EU7|C1GLC_HUMAN	C1GALT1C1	C1GALT1-specific chaperone 1 OS=Homo sapiens OX=9606 GN=C1GALT1C1 PE=1 SV=1	1151	2	329.866	376.283	342.155	323.487	386.573	370.898	356.261	367.707	380.446	333.937	337.395	372.876	397.392	342.542	366.942	360.014	0.105718	0.553621	0.508539		0.0577813	0.445671	0.575276		0.116052	0.965311	0.174119		0.0730941	0.425101	0.751187
sp|Q9NSG2|CA112_HUMAN	C1orf112	Uncharacterized protein C1orf112 OS=Homo sapiens OX=9606 GN=C1orf112 PE=1 SV=1	6211	1	67.5039	73.9739	61.352	71.0774	63.4463	55.2864	59.3808	61.7167	64.5249	64.9097	67.8553	61.9687	66.3181	73.4	71.9606	60.7735	-0.0643208	0.394051	0.6364		0.00335442	0.0105586	0.987286		-0.204636	1.25143	0.101732		-0.100805	0.731631	0.576337
sp|Q8NDD1-5|CA131_HUMAN	C1orf131	Isoform 2 of Uncharacterized protein C1orf131 OS=Homo sapiens OX=9606 GN=C1orf131	6041	3	199.496	197.584	203.768	221.577	159.171	176.631	187.764	225.366	222.952	200.624	204.275	195.373	200.113	190.174	218.145	202.811	-0.0392042	0.397821	0.634003		-0.0141426	0.071945	0.924501		-0.238312	1.27258	0.0974998		0.0727754	0.480482	0.718361
sp|Q9H425|CA198_HUMAN	C1orf198	Uncharacterized protein C1orf198 OS=Homo sapiens OX=9606 GN=C1orf198 PE=1 SV=1	4942	2	88.0588	82.7482	90.0504	85.2422	77.3002	75.7227	73.1269	93.6532	94.4388	100.141	90.1888	83.6194	86.2913	75.7711	82.4072	83.0748	0.00295979	0.0240276	0.974859		-0.106098	0.954403	0.282967		-0.198507	2.59147	0.0109819	+	0.151182	1.78572	0.185875
sp|Q9BWL3|CA043_HUMAN	C1orf43	Uncharacterized protein C1orf43 OS=Homo sapiens OX=9606 GN=C1orf43 PE=2 SV=1	7437	1	8.83158	9.68788	7.77894	7.03925	5.63455	10.0837	6.36046	6.43056	9.73214	9.39216	8.55578	8.17518	8.53534	6.25745	5.06524	8.09451	0.0254042	0.0858432	0.918305		-0.380746	0.744298	0.378794		-0.216	0.303794	0.629806		0.0179242	0.0273192	0.985941
sp|Q8N6N3|CA052_HUMAN	C1orf52	UPF0690 protein C1orf52 OS=Homo sapiens OX=9606 GN=C1orf52 PE=1 SV=1	7743	1	110.099	114.221	140.674	120.444	95.7313	105.259	113.206	115.034	116.826	112.059	106.42	119.54	99.2622	105.254	131.281	119.543	-0.160644	0.682479	0.421623		-0.0314826	0.0935511	0.90016		-0.209518	0.989864	0.166836		-0.0759435	0.391822	0.773041
sp|Q07021|C1QBP_HUMAN	C1QBP	Complement component 1 Q subcomponent-binding protein, mitochondrial OS=Homo sapiens OX=9606 GN=C1QBP PE=1 SV=1	2562	2	17.9154	26.5743	23.4248	19.0724	16.713	20.4712	29.0328	23.9901	16.7418	22.5611	23.4347	20.9564	26.7972	25.2801	21.3336	16.947	0.136684	0.346812	0.677155		-0.0386356	0.0632918	0.931506		0.00139459	0.00167945	0.998052		-0.0427784	0.0726401	0.964594
sp|Q9BXI9|C1QT6_HUMAN	C1QTNF6	Complement C1q tumor necrosis factor-related protein 6 OS=Homo sapiens OX=9606 GN=C1QTNF6 PE=1 SV=4	6171	1	86.3817	89.0781	95.0945	92.7214	84.6973	86.3249	80.415	92.3682	121.311	73.6221	114.961	109.721	103.138	93.4553	109.982	101.467	0.266433	2.00769	0.0808757		0.160122	0.899	0.305475		-0.115496	1.33396	0.0877125		0.047376	0.0746477	0.964035
sp|Q9GZN8-2|CT027_HUMAN	C20orf27	Isoform 2 of UPF0687 protein C20orf27 OS=Homo sapiens OX=9606 GN=C20orf27	5495	1	10.5497	11.0542	16.326	15.5573	14.7823	11.2582	9.25478	11.2351	10.0937	12.6587	15.2341	15.5105	12.7303	8.47368	16.5236	12.1076	0.137965	0.303551	0.714943		-0.137806	0.157799	0.830459		-0.183934	0.294426	0.639621		-0.217774	0.515794	0.696856
tr|H7BZW1|H7BZW1_HUMAN	C21orf59-TCP10L	Uncharacterized protein (Fragment) OS=Homo sapiens OX=9606 GN=C21orf59-TCP10L PE=4 SV=1	4143	2	66.9014	71.4653	70.8398	65.5675	52.3108	49.5083	49.6789	56.462	61.5916	63.5664	72.1737	73.5749	63.2233	63.7217	62.0353	66.0246	0.0178427	0.0815204	0.92293		-0.103246	1.30129	0.186746		-0.443401	3.98493	0.00107463	+	-0.183112	1.3356	0.320357
sp|Q9Y426|C2CD2_HUMAN	C2CD2	C2 domain-containing protein 2 OS=Homo sapiens OX=9606 GN=C2CD2 PE=1 SV=2	2289	1	46.4069	65.6007	61.0315	62.706	56.6115	65.918	59.3857	53.9318	67.2554	59.5476	55.1773	71.3045	68.3418	60.7346	65.327	61.5299	0.143727	0.383006	0.647372		0.0972765	0.337036	0.664103		0.0507424	0.146266	0.819949		0.0383912	0.0955052	0.955039
sp|Q4AC94|C2CD3_HUMAN	C2CD3	C2 domain-containing protein 3 OS=Homo sapiens OX=9606 GN=C2CD3 PE=1 SV=4	3377	1	89.8863	101.356	107.899	110.016	89.179	80.9018	84.2921	101.045	91.0886	119.553	113.15	96.5545	79.0569	85.494	92.6685	86.6271	-0.0987115	0.227944	0.784857		-0.209271	1.36208	0.171736		-0.26742	1.70056	0.0467593	+	0.017747	0.0454064	0.978117
sp|Q86YS7-3|C2CD5_HUMAN	C2CD5	Isoform 3 of C2 domain-containing protein 5 OS=Homo sapiens OX=9606 GN=C2CD5	2012	4	863.403	869.206	872.154	883.681	868.549	834.454	833.277	872.532	938.457	889.769	849.116	816.291	876.079	813.97	896.213	891.864	-0.0424248	0.545483	0.514937		-0.00924654	0.0667018	0.929235		-0.0450483	0.865678	0.210286		0.0451829	0.545632	0.679875
sp|Q9BVC5|ASHWN_HUMAN	C2orf49	Ashwin OS=Homo sapiens OX=9606 GN=C2orf49 PE=1 SV=1	5080	4	105.392	112.925	112.771	106.738	100.211	100.403	106.845	108.362	107.173	100.827	97.0791	95.5195	111.25	103.421	103.318	109.154	-0.114682	0.6271	0.458944		-0.0556548	0.709875	0.39677		-0.0948625	1.15105	0.123362		-0.0537559	0.582398	0.660911
sp|Q8N8R5|CB069_HUMAN	C2orf69	UPF0565 protein C2orf69 OS=Homo sapiens OX=9606 GN=C2orf69 PE=1 SV=1	4071	2	117.405	111.437	137.957	144.024	98.5838	106.517	112.123	127.736	113.648	128.261	133.644	134.051	145.81	119.677	132.624	135.539	0.117193	0.527064	0.528591		0.0238361	0.0809209	0.914918		-0.266033	1.262	0.0994381		-0.0456225	0.163851	0.914903
sp|A6NCS6|CB072_HUMAN	C2orf72	Uncharacterized protein C2orf72 OS=Homo sapiens OX=9606 GN=C2orf72 PE=1 SV=2	665	1	21.387	24.7176	23.2369	22.6707	27.1849	30.0942	31.6984	24.9737	24.4292	27.9741	24.7795	27.6509	31.1193	30.4179	36.5422	32.1298	0.271548	1.07115	0.253635		0.519586	2.0714	0.0828558		0.365687	1.93757	0.0324809	+	0.164489	1.02887	0.444734
sp|Q3KRA6|CB076_HUMAN	C2orf76	UPF0538 protein C2orf76 OS=Homo sapiens OX=9606 GN=C2orf76 PE=1 SV=3	2733	2	219.02	227.278	244.818	211.231	238.686	237.566	221.168	222.452	219.885	211.651	259.361	247.588	232.118	233.062	224.519	221.685	0.127741	0.960721	0.289617		0.00717457	0.0489659	0.945307		0.044682	0.324037	0.608089		-0.0475361	0.401499	0.765447
sp|P01024|CO3_HUMAN	C3	Complement C3 OS=Homo sapiens OX=9606 GN=C3 PE=1 SV=2	677	3	107.58	86.8312	113.822	101.211	166.871	116.782	84.9407	90.1102	134.823	96.9025	91.8354	84.7811	89.844	101.643	126.701	105.815	-0.198317	1.01785	0.269706		0.122367	0.407242	0.605085		0.2159	0.277046	0.659588		0.0520181	0.091468	0.95576
sp|Q6P1S2|CC033_HUMAN	C3orf33	Protein C3orf33 OS=Homo sapiens OX=9606 GN=C3orf33 PE=1 SV=2	6475	1	19.3047	19.3065	22.9571	22.2668	12.0075	17.2034	23.1175	22.2305	24.8915	18.7587	19.1376	26.2779	25.4314	20.9886	24.2443	23.1375	0.162655	0.412043	0.621502		0.12286	0.632928	0.442178		-0.311097	0.428014	0.502367		0.0622828	0.170183	0.911114
sp|Q5JPI3|CC038_HUMAN	C3orf38	Uncharacterized protein C3orf38 OS=Homo sapiens OX=9606 GN=C3orf38 PE=1 SV=1	7560	2	123.678	139.963	133.843	134.334	120.837	122.353	121.098	131.255	148.894	134.009	148.742	131.179	139.577	126.008	137.488	128.408	0.0723032	0.48778	0.559858		-0.0249814	0.180108	0.804529		-0.129405	1.41109	0.076572		0.0534958	0.322044	0.821693
sp|P04003|C4BPA_HUMAN	C4BPA	C4b-binding protein alpha chain OS=Homo sapiens OX=9606 GN=C4BPA PE=1 SV=2	8169	1	258.181	257.127	212.092	202.317	210.351	229.997	176.014	279.447	298.746	278.5	184.81	180.705	184.312	186.721	235.11	229.725	-0.3341	1.4556	0.147272		-0.0966669	0.280398	0.713139		-0.178008	0.543754	0.391235		0.305014	1.40915	0.299957
sp|Q49AR2|CE022_HUMAN	C5orf22	UPF0489 protein C5orf22 OS=Homo sapiens OX=9606 GN=C5orf22 PE=1 SV=2	7163	3	468.337	456.001	447.24	460.661	439.78	422.524	444.227	473.566	479.659	456.91	493.585	460.819	456.543	478.592	489.945	463.78	0.0374151	0.389308	0.641697		0.0596175	0.993411	0.270354		-0.0729639	1.24863	0.102362		0.0371602	0.657463	0.618715
sp|Q96GV9|CE030_HUMAN	C5orf30	UNC119-binding protein C5orf30 OS=Homo sapiens OX=9606 GN=C5orf30 PE=1 SV=1	4087	1	6.60579	5.67053	10.5736	10.0616	8.04656	9.61891	9.73015	8.87626	7.78205	7.60046	10.02	7.66889	5.5026	7.41532	7.18839	12.5984	-0.0821187	0.0878202	0.91735		0.140349	0.15331	0.835834		0.19547	0.33583	0.59618		0.0219636	0.0315251	0.985526
sp|Q96MH7|CE034_HUMAN	C5orf34	Uncharacterized protein C5orf34 OS=Homo sapiens OX=9606 GN=C5orf34 PE=2 SV=2	6970	1	9.60559	8.95969	10.5528	9.32762	9.00823	10.5278	10.0584	8.95187	8.8609	8.66326	7.56086	9.51012	8.70578	9.84964	10.5635	12.7491	-0.165434	0.651907	0.439883		0.195707	0.672461	0.421016		0.0371384	0.167865	0.793188		-0.120579	1.03491	0.442927
sp|A6NDU8|CE051_HUMAN	C5orf51	UPF0600 protein C5orf51 OS=Homo sapiens OX=9606 GN=C5orf51 PE=1 SV=1	6018	2	334.376	351.823	319.57	343.46	346.966	314.461	344.788	342.344	337.464	379.671	347.834	322.925	326.267	324.083	343.391	329.837	-0.0212651	0.182335	0.827704		-0.0204925	0.208511	0.780387		-0.00868716	0.0544301	0.934171		0.0651612	0.442945	0.739113
sp|Q5T0Z8|CF132_HUMAN	C6orf132	Uncharacterized protein C6orf132 OS=Homo sapiens OX=9606 GN=C6orf132 PE=1 SV=4	305	6	168.831	158.814	183.822	167.222	176.713	181.214	171.919	160.15	166.568	157.718	197.019	183.072	168.781	183.013	179.658	173.242	0.107885	0.614517	0.465918		0.0759147	0.713355	0.394917		0.0595291	0.543302	0.391584		-0.0697872	0.646446	0.62449
sp|Q5SZD1|CF141_HUMAN	C6orf141	Uncharacterized protein C6orf141 OS=Homo sapiens OX=9606 GN=C6orf141 PE=2 SV=3	5552	1	18.576	21.7976	20.3778	21.2393	18.6752	23.9751	17.2684	17.7092	20.024	19.6099	25.0338	24.3085	21.2549	23.7751	23.1018	19.2909	0.198209	1.03586	0.264447		0.10229	0.390427	0.620471		-0.0492376	0.113353	0.862885		-0.100232	0.618135	0.639966
sp|O95873|CF047_HUMAN	C6orf47	Uncharacterized protein C6orf47 OS=Homo sapiens OX=9606 GN=C6orf47 PE=1 SV=2	5533	2	148.833	143.805	152.911	161.896	151.536	167.118	148.872	152.475	175.535	153.656	145.617	165.154	167.792	177.934	161.562	162.428	0.0694962	0.384159	0.646241		0.139685	1.1561	0.217786		0.0368081	0.226981	0.720874		0.0786199	0.433628	0.745469
sp|Q9GZU0|CF062_HUMAN	C6orf62	Uncharacterized protein C6orf62 OS=Homo sapiens OX=9606 GN=C6orf62 PE=2 SV=1	7821	1	46.025	51.2728	66.0741	63.38	35.0544	34.4688	34.3455	46.7868	42.7833	43.0969	59.3736	59.2184	45.5457	40.7918	48.1604	50.4602	-0.0461203	0.0937099	0.910724		-0.276757	0.869335	0.315629		-0.695512	1.95786	0.0309097	+	-0.343603	1.19035	0.375208
sp|Q6UWU4-2|CF089_HUMAN	C6orf89	Isoform 2 of Bombesin receptor-activated protein C6orf89 OS=Homo sapiens OX=9606 GN=C6orf89	5800	3	463.126	514.874	460.363	458.619	441.57	442.34	420.659	490.647	463.615	511.129	411.237	469.542	532.337	530.143	499.543	472.505	-0.0160684	0.0462816	0.954891		0.0785169	0.564574	0.484477		-0.123773	1.30814	0.0919661		0.043177	0.312877	0.828961
sp|Q9BPX7-2|CG025_HUMAN	C7orf25	Isoform 2 of UPF0415 protein C7orf25 OS=Homo sapiens OX=9606 GN=C7orf25	7251	1	86.4501	73.3279	77.0751	76.8054	76.435	77.6114	71.0749	96.6507	68.6228	87.7809	79.7836	75.2475	78.5492	79.6423	75.4193	88.4395	-0.00798144	0.0486352	0.953658		0.0492942	0.229357	0.759573		-0.0618116	0.42231	0.507859		0.0933661	0.222743	0.881449
sp|Q9BRJ6|CG050_HUMAN	C7orf50	Uncharacterized protein C7orf50 OS=Homo sapiens OX=9606 GN=C7orf50 PE=1 SV=1	3083	2	138.72	143.071	147.585	146.922	140.887	159.931	151.231	132.973	136.389	120.782	138.356	129.087	149.253	126.02	133.806	135.13	-0.0548796	0.331996	0.691462		-0.130328	1.52408	0.143772		0.0632047	0.446623	0.482283		-0.149287	1.03424	0.443073
sp|Q9H7E9-2|CH033_HUMAN	C8orf33	Isoform 2 of UPF0488 protein C8orf33 OS=Homo sapiens OX=9606 GN=C8orf33	1904	1	12.3934	14.2562	16.2744	14.8568	15.6906	16.0387	11.1946	16.1894	13.7819	12.8515	13.4201	15.1707	14.8337	12.8031	14.8412	17.3826	0.00779818	0.0269198	0.973096		0.0508593	0.121702	0.870159		-0.0256354	0.0459288	0.945572		-0.0171353	0.0459542	0.9777
sp|Q96K31|CH076_HUMAN	C8orf76	Uncharacterized protein C8orf76 OS=Homo sapiens OX=9606 GN=C8orf76 PE=2 SV=1	2533	1	33.1953	33.4498	34.5348	37.6333	30.5245	34.0443	35.0582	24.6132	38.7198	38.3867	33.7285	39.5483	32.3098	31.943	35.4078	31.8696	0.0165926	0.0571749	0.94741		-0.0693434	0.465864	0.558096		-0.064215	0.361435	0.570776		-0.0622225	0.0957922	0.955114
tr|H0YF29|H0YF29_HUMAN	C8orf82	UPF0598 protein C8orf82 (Fragment) OS=Homo sapiens OX=9606 GN=C8orf82 PE=1 SV=1	1711	2	162.302	182.282	152.259	152.482	163.886	178.807	156.466	185.569	175.03	194.307	188.324	196.582	230.12	196.181	163.875	195.317	0.33524	1.42474	0.153437		0.188528	0.826301	0.334531		0.0373102	0.172336	0.788107		0.19096	1.28259	0.336705
sp|Q5T6V5|QSPP_HUMAN	C9orf64	Queuosine salvage protein OS=Homo sapiens OX=9606 GN=C9orf64 PE=1 SV=1	4308	9	1973.03	2105.04	1998.6	1946.4	2144.76	1949.32	2001.84	1980.21	1938.72	1909.13	2120.07	2037.05	2017.27	2074.52	2027.03	2105.56	0.0374845	0.510961	0.541985		0.0452684	0.728035	0.387323		0.0181899	0.138617	0.827053		-0.0456236	0.742837	0.570429
sp|Q9NZ63|TLS1_HUMAN	C9orf78	Telomere length and silencing protein 1 homolog OS=Homo sapiens OX=9606 GN=C9orf78 PE=1 SV=1	3279	4	1142.25	1098.99	1156.25	1168.76	922.551	873.796	959.028	1050.9	1091.43	1124.96	1143.85	1150.38	1002.08	1040.79	1092.51	1112.64	-0.0576202	0.324854	0.698085		-0.077518	1.02677	0.257343		-0.314384	2.25786	0.0187245	+	-0.0680493	0.907653	0.492953
sp|O43570|CAH12_HUMAN	CA12	Carbonic anhydrase 12 OS=Homo sapiens OX=9606 GN=CA12 PE=1 SV=1	6851	2	330.74	362.175	338.834	358.123	350.794	330.065	335.658	387.877	367.259	370.862	335.117	348.055	372.178	438.236	361.755	404.373	0.0174697	0.116814	0.88803		0.204948	0.957572	0.282007		-0.0357325	0.374149	0.557913		0.111905	1.42818	0.294721
sp|Q8N1Q1|CAH13_HUMAN	CA13	Carbonic anhydrase 13 OS=Homo sapiens OX=9606 GN=CA13 PE=1 SV=1	7218	2	133	150.419	149.006	144.787	155.972	162.717	145.82	157.691	138.74	150.423	158.743	165.487	178.03	148.274	160.753	178.172	0.214415	1.62278	0.119815		0.168032	0.839229	0.329063		0.101851	0.785399	0.24355		0.0454075	0.269938	0.853749
sp|P00918|CAH2_HUMAN	CA2	Carbonic anhydrase 2 OS=Homo sapiens OX=9606 GN=CA2 PE=1 SV=2	7457	3	344.941	358.284	365.792	374.584	390.252	399.179	388.375	398.54	367.513	372.57	376.237	366.317	359.569	389.296	387.586	402.786	0.0260595	0.350029	0.674945		0.124191	1.98506	0.0893821		0.122023	1.96976	0.030083	+	0.0724023	0.746886	0.568695
sp|Q9Y2D0|CAH5B_HUMAN	CA5B	Carbonic anhydrase 5B, mitochondrial OS=Homo sapiens OX=9606 GN=CA5B PE=1 SV=1	2324	1	13.3212	14.9911	17.7543	17.7231	17.8328	20.9221	24.2168	21.8019	14.6028	15.8037	21.469	14.1411	17.8265	11.5076	14.5506	20.1945	0.14915	0.294338	0.722843		-0.0770314	0.105213	0.887776		0.395616	1.16248	0.120778		0.11408	0.213807	0.888449
sp|Q16790|CAH9_HUMAN	CA9	Carbonic anhydrase 9 OS=Homo sapiens OX=9606 GN=CA9 PE=1 SV=2	3362	1	113.791	115.232	113.848	124.372	124.734	149.026	155.501	114.343	110.894	118.718	208.077	229.041	207.026	174.47	161.295	164.121	0.877671	3.71117	0.0106667	+	0.512639	3.741	0.00845714	+	0.287273	1.06204	0.145589		-0.0264786	0.255166	0.862317
sp|Q9H8G2|CAAP1_HUMAN	CAAP1	Caspase activity and apoptosis inhibitor 1 OS=Homo sapiens OX=9606 GN=CAAP1 PE=1 SV=2	5914	2	194.094	195.188	205.721	216.317	203.209	203.662	190.686	201.817	208.387	208.583	186.78	207.917	188.218	210.769	195.42	198.146	-0.0622799	0.430285	0.607304		-0.00926241	0.0657296	0.929985		-0.0254173	0.207674	0.743513		0.0254475	0.253322	0.863228
sp|Q9Y376|CAB39_HUMAN	CAB39	Calcium-binding protein 39 OS=Homo sapiens OX=9606 GN=CAB39 PE=1 SV=1	3294	10	623.424	665.247	622.934	634.261	676.381	675.572	602.231	651.12	636.556	655.641	659.213	654.551	676.923	686.586	693.583	654.445	0.0605157	1.12597	0.235162		0.0916954	1.30926	0.184651		0.0318559	0.196602	0.757185		0.0258074	0.436871	0.743023
sp|Q9H9S4|CB39L_HUMAN	CAB39L	Calcium-binding protein 39-like OS=Homo sapiens OX=9606 GN=CAB39L PE=1 SV=3	3294	2	39.5536	41.5133	37.5751	35.9056	37.1755	40.4486	38.3002	35.1412	31.6617	43.9819	44.2283	42.0326	44.6654	33.2233	38.3396	32.6332	0.17737	1.64563	0.117457		-0.155385	0.803182	0.346493		0.00142251	0.00820887	0.991375		-0.0769047	0.190475	0.900743
sp|Q9Y6J0|CABIN_HUMAN	CABIN1	Calcineurin-binding protein cabin-1 OS=Homo sapiens OX=9606 GN=CABIN1 PE=1 SV=1	194	7	210.481	203.648	208.033	223.586	214.471	204.782	202.043	215.35	226.121	226.584	221.452	224.823	196.737	211.592	213.026	215.426	0.0179982	0.0930146	0.911716		0.0138165	0.172867	0.812592		-0.0295079	0.316167	0.617483		0.0752556	0.994026	0.457972
sp|P54289|CA2D1_HUMAN	CACNA2D1	Voltage-dependent calcium channel subunit alpha-2/delta-1 OS=Homo sapiens OX=9606 GN=CACNA2D1 PE=1 SV=3	3437	7	685.874	749.257	700.919	699.996	718.749	798.217	763.49	691.469	687.521	743.072	749.676	767.07	758.825	742.291	747.079	784.973	0.0981312	1.48547	0.14025		0.0969633	1.29685	0.187256		0.0999598	0.868309	0.208743		-0.0034762	0.025629	0.987341
sp|Q9BXT2|CCG6_HUMAN	CACNG6	Voltage-dependent calcium channel gamma-6 subunit OS=Homo sapiens OX=9606 GN=CACNG6 PE=1 SV=1	6322	1	14.3272	13.8553	9.65988	12.5865	11.9582	8.17378	12.3529	11.3554	8.38992	8.61299	9.84813	6.98821	6.79081	8.08404	10.6562	9.08695	-0.683596	1.47711	0.141793		-0.435551	1.26959	0.192341		-0.227145	0.41532	0.515391		-0.412889	1.06398	0.430046
sp|Q8WUQ7-2|CATIN_HUMAN	CACTIN	Isoform 2 of Cactin OS=Homo sapiens OX=9606 GN=CACTIN	6	5	392.922	391.779	405.514	395.257	398.115	388.092	408.236	406.863	383.465	398.511	379.209	406.024	377.534	368.78	411.056	416.606	-0.0329848	0.358042	0.66874		0.00688655	0.0391122	0.957659		0.00628937	0.0920856	0.891417		-0.00062057	0.00723378	0.996898
sp|Q86Y37|CACL1_HUMAN	CACUL1	CDK2-associated and cullin domain-containing protein 1 OS=Homo sapiens OX=9606 GN=CACUL1 PE=1 SV=1	449	1	14.6188	20.4475	17.7629	20.2908	19.5238	16.2079	21.8571	16.2162	19.6063	21.2932	20.8593	12.2147	12.5806	21.1129	24.0534	21.0961	-0.297191	0.439643	0.599907		0.283087	1.06229	0.24687		0.0726505	0.162903	0.798894		0.0623547	0.144179	0.928293
sp|Q9HB71|CYBP_HUMAN	CACYBP	Calcyclin-binding protein OS=Homo sapiens OX=9606 GN=CACYBP PE=1 SV=2	1223	5	338.398	307.464	390.423	364.211	309.094	348.585	331.778	338.328	317.465	319.182	344.934	276.296	295.022	287.711	300.974	284.278	-0.197785	0.762011	0.378308		-0.261717	1.48822	0.149216		-0.082313	0.397649	0.532611		-0.102438	0.570684	0.665016
sp|P27708|PYR1_HUMAN	CAD	CAD protein OS=Homo sapiens OX=9606 GN=CAD PE=1 SV=3	208	16	2363.73	2314.53	2394.99	2365.46	2429.43	2345.64	2481.76	2233.57	2395.62	2348.03	2395.3	2350.02	2252.23	2331.23	2370.37	2272.49	-0.0170701	0.226789	0.785191		-0.0216554	0.443316	0.57653		0.0355065	0.567576	0.374281		-0.0214141	0.253711	0.86337
sp|P22676|CALB2_HUMAN	CALB2	Calretinin OS=Homo sapiens OX=9606 GN=CALB2 PE=2 SV=2	5792	4	355.626	353.401	346.983	311.173	329.475	288.483	283.043	315.232	309.493	306.216	392.123	353.013	366.757	373.66	397.557	356.334	0.117555	0.906584	0.308863		0.137644	1.05771	0.248094		-0.187837	1.0389	0.152353		-0.137439	1.291	0.334027
sp|Q9P1Z2|CACO1_HUMAN	CALCOCO1	Calcium-binding and coiled-coil domain-containing protein 1 OS=Homo sapiens OX=9606 GN=CALCOCO1 PE=1 SV=2	3386	5	135.801	111.858	121.153	124.925	169.452	167.821	166.873	151.064	143.262	142.272	141.066	134.455	137.39	140.826	142.925	144.992	0.160327	1.19399	0.212265		0.214785	1.50541	0.146951		0.448586	2.38101	0.0155243	+	0.240559	1.73821	0.192
sp|Q13137-4|CACO2_HUMAN	CALCOCO2	Isoform 4 of Calcium-binding and coiled-coil domain-containing protein 2 OS=Homo sapiens OX=9606 GN=CALCOCO2	4339	8	578.447	547.64	621.785	577.29	516.695	472.942	533.851	1106.28	1140.24	1025.39	587.581	551.146	576.05	596.403	627.485	631.046	-0.0233091	0.195472	0.816884		0.0900901	0.970439	0.278314		-0.19531	1.40113	0.0785531		0.907889	4.20733	0.00541176	+
tr|E7EMB3|E7EMB3_HUMAN	CALM2	Calmodulin-2 OS=Homo sapiens OX=9606 GN=CALM2 PE=1 SV=1	4543	4	138.619	191.64	139.156	121.881	209.378	142.644	119.043	162.948	126.73	126.528	164.347	153.519	163.379	150.737	72.9366	69.192	0.138203	0.40007	0.632277		-0.67445	0.710356	0.396706		0.0670789	0.0844918	0.900298		-0.0810495	0.16817	0.91159
sp|Q96GE6|CALL4_HUMAN	CALML4	Calmodulin-like protein 4 OS=Homo sapiens OX=9606 GN=CALML4 PE=2 SV=3	3284	5	409.674	367.292	394.319	405.183	372.781	307.179	325.642	420.131	419.047	367.282	556.461	503.635	551.648	507.669	542.056	515.607	0.446801	2.86175	0.0284966	+	0.405532	3.52927	0.0145098	+	-0.237104	1.06686	0.14419		0.0276114	0.136964	0.932462
sp|P27797|CALR_HUMAN	CALR	Calreticulin OS=Homo sapiens OX=9606 GN=CALR PE=1 SV=1	4337	17	3280.06	2358.55	3559.46	3473.86	2530.52	3415.45	2783.94	3331.44	2693.07	2945.11	2877.24	2598.95	2041.38	2442.54	2085.56	2110.75	-0.334235	0.790049	0.36314		-0.502764	1.55082	0.140285		-0.115409	0.246915	0.69806		-0.0703821	0.163238	0.914848
sp|O43852-3|CALU_HUMAN	CALU	Isoform 3 of Calumenin OS=Homo sapiens OX=9606 GN=CALU	4565	10	534.448	422.422	549.944	547.007	559.854	607.094	620.053	517.339	555.19	544.104	585.407	593.415	559.04	556.178	583.51	595.795	0.181916	0.856318	0.331054		0.179812	0.84546	0.32547		0.221226	1.0373	0.152494		0.07743	0.326864	0.817774
sp|O43852-4|CALU_HUMAN	CALU	Isoform 4 of Calumenin OS=Homo sapiens OX=9606 GN=CALU	4565	1	14.5087	12.5722	9.49208	9.78732	12.4268	11.6799	17.0597	14.6824	7.65331	10.8068	14.6514	12.0927	16.0706	17.1393	11.1349	14.4472	0.312965	0.793414	0.360987		0.297495	0.573784	0.478519		0.245791	0.483471	0.445011		-0.09684	0.11164	0.947305
sp|Q14012|KCC1A_HUMAN	CAMK1	Calcium/calmodulin-dependent protein kinase type 1 OS=Homo sapiens OX=9606 GN=CAMK1 PE=1 SV=1	1372	2	108.883	113.144	121.941	129.292	105.035	118.299	127.599	118.917	123.657	118.71	122.216	127.009	94.2652	130.45	149.142	131.366	-0.0563851	0.137913	0.868459		0.21182	1.2382	0.199472		-0.0177972	0.0623548	0.924971		0.0284746	0.184129	0.902874
tr|E9PF82|E9PF82_HUMAN	CAMK2D	Calcium/calmodulin-dependent protein kinase type II subunit delta OS=Homo sapiens OX=9606 GN=CAMK2D PE=1 SV=1	5932	5	716.593	708.136	730.523	724.442	803.781	785.744	743.912	726.599	694.476	711.25	777.361	779.588	805.694	767.435	739.664	778.189	0.129431	2.33152	0.0557532		0.0812667	1.32583	0.180271		0.11092	1.16414	0.120083		-0.0185981	0.35277	0.801147
sp|Q13555-7|KCC2G_HUMAN	CAMK2G	Isoform 7 of Calcium/calmodulin-dependent protein kinase type II subunit gamma OS=Homo sapiens OX=9606 GN=CAMK2G	5932	4	470.065	492.123	505.015	487.612	515.965	486.663	477.07	507.126	477.289	473.04	485.459	471.552	492.919	498.644	479.849	505.97	-0.0157791	0.219459	0.79494		0.0180628	0.228843	0.759814		0.012981	0.116618	0.858261		-0.0087616	0.0808139	0.960112
tr|J3KPJ3|J3KPJ3_HUMAN	CAMKK1	Calcium/calmodulin-dependent protein kinase kinase 1 OS=Homo sapiens OX=9606 GN=CAMKK1 PE=1 SV=1	5184	2	57.3686	58.3021	64.532	63.4894	70.8684	52.9145	66.122	52.7261	50.5773	54.3571	47.3406	55.2211	61.5273	60.1338	58.9746	57.8802	-0.16191	0.56044	0.502948		-0.0446384	0.412832	0.600796		0.0462271	0.120491	0.853626		-0.211926	1.99014	0.139777
sp|Q96RR4|KKCC2_HUMAN	CAMKK2	Calcium/calmodulin-dependent protein kinase kinase 2 OS=Homo sapiens OX=9606 GN=CAMKK2 PE=1 SV=2	7042	3	202.901	220.468	220.966	211.914	231.226	224.766	229.25	219.812	202.789	196.543	209.42	220.799	210.795	204.968	215.367	223.408	-0.00217094	0.0194271	0.980367		0.0034634	0.0251762	0.971266		0.0943876	1.39454	0.0789845		-0.053464	0.394299	0.771598
sp|Q7Z624|CMKMT_HUMAN	CAMKMT	Calmodulin-lysine N-methyltransferase OS=Homo sapiens OX=9606 GN=CAMKMT PE=1 SV=2	1667	4	151.49	146.188	144.159	152.012	123.653	125.064	122.165	156.038	149.592	166.086	145.98	135.737	121.137	126.938	135.187	137.513	-0.148649	0.714848	0.399695		-0.156841	1.57352	0.135945		-0.263792	3.82631	0.00116049	+	0.0818969	0.71452	0.585719
sp|P49069|CAMLG_HUMAN	CAMLG	Calcium signal-modulating cyclophilin ligand OS=Homo sapiens OX=9606 GN=CAMLG PE=1 SV=1	7329	2	90.5744	91.0015	89.0349	97.1571	92.2667	89.1488	89.7751	89.1972	98.0899	101.821	86.7757	92.213	102.647	85.9523	100.183	97.7332	0.0273726	0.127297	0.878933		0.0390626	0.195255	0.791939		-0.0238074	0.311706	0.62194		0.0664344	0.429833	0.748581
sp|Q5T5Y3-3|CAMP1_HUMAN	CAMSAP1	Isoform 3 of Calmodulin-regulated spectrin-associated protein 1 OS=Homo sapiens OX=9606 GN=CAMSAP1	1069	8	664.911	665.058	708.75	685.69	695.99	705.99	683.24	646.933	620.093	611.396	683.476	684.209	626.699	681.389	664.678	660.113	-0.0356685	0.297057	0.721658		-0.0260863	0.439381	0.579408		0.0296669	0.514229	0.415977		-0.121299	1.77535	0.186556
sp|Q08AD1|CAMP2_HUMAN	CAMSAP2	Calmodulin-regulated spectrin-associated protein 2 OS=Homo sapiens OX=9606 GN=CAMSAP2 PE=1 SV=3	1009	8	643.359	645.577	654.691	640.549	691.55	708.211	696.502	665.749	609.408	648.791	707.402	706.542	620.169	649.764	680.551	665.09	0.0670716	0.399441	0.632999		0.0418055	0.820173	0.33821		0.113129	2.9603	0.00628571	+	-0.0115372	0.101779	0.95125
sp|Q9P1Y5-2|CAMP3_HUMAN	CAMSAP3	Isoform 2 of Calmodulin-regulated spectrin-associated protein 3 OS=Homo sapiens OX=9606 GN=CAMSAP3	1030	9	247.615	277.117	271.385	243.57	258.819	223.365	251.245	264.428	260.403	248.433	299.435	251.461	265.616	300.03	265.993	260.326	0.064822	0.295444	0.722518		0.0831203	0.452947	0.568623		-0.089004	0.482576	0.445647		-0.0103252	0.0673636	0.964118
sp|Q86VP6|CAND1_HUMAN	CAND1	Cullin-associated NEDD8-dissociated protein 1 OS=Homo sapiens OX=9606 GN=CAND1 PE=1 SV=2	127	15	1925.39	1953.9	1916.5	1904.94	2188.09	2051.14	2009.6	2048.82	1916.73	1941.98	1936.47	1892	1995.26	1981.07	2049.77	1976.02	0.0117076	0.181053	0.827311		0.0565148	1.21466	0.204154		0.112737	1.06048	0.145998		0.0320579	0.40822	0.761596
sp|Q8WVQ1|CANT1_HUMAN	CANT1	Soluble calcium-activated nucleotidase 1 OS=Homo sapiens OX=9606 GN=CANT1 PE=1 SV=1	1369	9	1290.16	1261.54	1289.68	1250.53	1263.34	1256.09	1316.36	1228.25	1312.25	1259.57	1186.43	1251.52	1257.67	1283.53	1250.85	1299.64	-0.0477182	0.67676	0.42513		0.00564042	0.101849	0.891576		0.00617347	0.0893532	0.894092		-0.00754609	0.0863151	0.957444
sp|P27824-2|CALX_HUMAN	CANX	Isoform 2 of Calnexin OS=Homo sapiens OX=9606 GN=CANX	1096	12	1337.41	1459.12	1372.66	1305.92	1360.92	1469.23	1378.88	1320.7	1390.88	1435.52	1183.68	1307.41	1411.57	1411.92	1332.4	1283.06	-0.0758815	0.375158	0.655493		-0.0278872	0.205241	0.783082		0.0360678	0.308472	0.625323		0.0146461	0.108891	0.947458
sp|Q01518|CAP1_HUMAN	CAP1	Adenylyl cyclase-associated protein 1 OS=Homo sapiens OX=9606 GN=CAP1 PE=1 SV=5	2412	15	849.745	877.704	864.803	883.966	955.106	971.308	932.75	877.991	856.782	872.294	972.706	917.454	872.408	953.633	916.927	912.281	0.0822658	0.6872	0.418083		0.0939581	1.66282	0.125417		0.133078	2.49144	0.0129612	+	3.45403e-05	0.000693352	0.999815
sp|P40123|CAP2_HUMAN	CAP2	Adenylyl cyclase-associated protein 2 OS=Homo sapiens OX=9606 GN=CAP2 PE=1 SV=1	1458	5	222.013	236.823	198.715	234.274	205.234	194.996	203.553	202.919	205.94	224.588	205.171	215.959	210.643	229.846	207.666	212.029	-0.0792096	0.564403	0.499892		-0.040273	0.217822	0.771126		-0.144631	1.08021	0.140933		-0.0765347	0.459716	0.728699
sp|P40121|CAPG_HUMAN	CAPG	Macrophage-capping protein OS=Homo sapiens OX=9606 GN=CAPG PE=1 SV=2	2677	7	456.704	441.537	444.69	402.807	507.812	462.148	460.618	436.559	443.259	403.687	509.87	395.759	475.616	452.76	490.833	447.903	0.070679	0.22733	0.785117		0.0882177	0.724346	0.389271		0.127903	1.01665	0.158738		-0.028316	0.190801	0.900607
sp|P07384|CAN1_HUMAN	CAPN1	Calpain-1 catalytic subunit OS=Homo sapiens OX=9606 GN=CAPN1 PE=1 SV=1	2881	13	1104.05	1083.62	1090.33	1071.95	1169.85	1033.45	1100.05	1061.2	1037.3	1101.8	1227.14	1113.94	1146.89	1130.57	1106.07	1044.91	0.0953161	0.847269	0.334617		0.00770724	0.0736613	0.922986		0.0162037	0.105193	0.875188		-0.0281193	0.413231	0.75861
sp|O75808|CAN15_HUMAN	CAPN15	Calpain-15 OS=Homo sapiens OX=9606 GN=CAPN15 PE=1 SV=1	1979	5	135.354	156.625	151.86	149.852	162.343	175.596	164.477	150.341	144.313	151.849	192.829	167.405	172.726	161.987	182.115	168.073	0.2588	1.548	0.131415		0.202355	1.47278	0.152456		0.175481	1.54499	0.0606294		0.00577592	0.0387125	0.983204
sp|P17655|CAN2_HUMAN	CAPN2	Calpain-2 catalytic subunit OS=Homo sapiens OX=9606 GN=CAPN2 PE=1 SV=6	3957	9	342.267	377.763	376.184	393.527	416.039	394.735	415.413	378.201	354.004	385.893	429.851	388.964	395.107	380.902	408.606	400.511	0.120113	0.945639	0.294039		0.0921978	0.858291	0.320571		0.13559	1.35383	0.0842944		0.00191371	0.0112449	0.995305
tr|H3BUR3|H3BUR3_HUMAN	CAPN3	Calpain-3 (Fragment) OS=Homo sapiens OX=9606 GN=CAPN3 PE=1 SV=1	8000	1	87.8666	88.392	83.5643	85.2477	75.5553	95.6043	77.7749	72.2079	88.4953	80.5086	86.8527	60.2826	76.2863	73.6362	77.508	81.478	-0.227866	0.558094	0.504848		-0.154721	1.31492	0.182763		-0.0638068	0.212445	0.737091		-0.106144	0.473113	0.719877
tr|E7EV01|E7EV01_HUMAN	CAPN5	Calpain-5 OS=Homo sapiens OX=9606 GN=CAPN5 PE=1 SV=2	558	3	66.4216	61.2754	61.126	60.8153	52.036	56.633	71.6053	62.9443	68.9381	58.0048	74.6105	83.3944	74.3169	67.1235	75.6934	72.8632	0.310211	1.88241	0.0891093		0.203263	1.45683	0.154842		-0.0670554	0.168989	0.792251		0.0177213	0.0775502	0.961643
sp|Q9Y6W3|CAN7_HUMAN	CAPN7	Calpain-7 OS=Homo sapiens OX=9606 GN=CAPN7 PE=1 SV=1	4282	8	333.124	326.104	366.939	339.366	343.487	318.04	340.787	354.334	344.811	344.844	346.924	342.423	309.97	316.751	354.588	342.11	-0.0357675	0.219742	0.794693		-0.0152924	0.0898365	0.90537		-0.0304988	0.238164	0.707529		0.0290098	0.296816	0.837126
tr|A0A0C4DGQ5|A0A0C4DGQ5_HUMAN	CAPNS1	Calpain small subunit 1 OS=Homo sapiens OX=9606 GN=CAPNS1 PE=1 SV=1	6651	10	865.957	832.691	824.828	857.583	871.831	853.426	835.708	820.074	766.094	782.624	904.84	792.39	904.889	881.857	940.047	879.674	0.0347598	0.190281	0.821366		0.0909707	1.09883	0.23391		0.0143263	0.234381	0.71239		-0.0985799	1.27224	0.340353
sp|Q14444|CAPR1_HUMAN	CAPRIN1	Caprin-1 OS=Homo sapiens OX=9606 GN=CAPRIN1 PE=1 SV=2	4629	5	1674.49	1565.48	1615.31	1535.47	1479.67	1448.7	1466.53	1604.19	1620.62	1594.07	1551.31	1555.24	1546.41	1520.7	1591.81	1473.28	-0.0420222	0.653326	0.438549		-0.0637261	0.696299	0.405815		-0.124391	1.80821	0.0379913	+	0.00849739	0.107356	0.948107
sp|Q6IMN6|CAPR2_HUMAN	CAPRIN2	Caprin-2 OS=Homo sapiens OX=9606 GN=CAPRIN2 PE=1 SV=1	7811	1	34.8523	40.2182	41.5369	42.9754	55.1181	67.9382	63.9304	39.5977	38.1587	39.6629	47.4676	48.1892	47.9215	51.2578	40.5906	40.9424	0.267024	1.56767	0.127493		0.145753	0.480851	0.545506		0.642665	2.34593	0.0163571	+	-0.0233455	0.122431	0.939882
sp|Q13938|CAYP1_HUMAN	CAPS	Calcyphosin OS=Homo sapiens OX=9606 GN=CAPS PE=1 SV=2	7671	1	19.8329	18.8794	17.2016	20.966	22.2459	18.7595	17.0014	21.3082	17.4313	18.1767	23.5728	18.5503	20.0681	20.1858	19.4854	24.874	0.105664	0.365503	0.664797		0.157965	0.534515	0.505034		0.00344572	0.00867655	0.990926		-0.0204327	0.0662919	0.965046
sp|P52907|CAZA1_HUMAN	CAPZA1	F-actin-capping protein subunit alpha-1 OS=Homo sapiens OX=9606 GN=CAPZA1 PE=1 SV=3	5216	7	652.162	633.692	647.726	658.223	731.861	680.224	696.67	660.782	674.391	657.947	667.983	693.279	685.59	721.061	692.807	680.496	0.0744548	1.70428	0.110214		0.107311	1.50494	0.147006		0.116942	1.30548	0.0923397		0.0361673	1.12671	0.400429
sp|P47755|CAZA2_HUMAN	CAPZA2	F-actin-capping protein subunit alpha-2 OS=Homo sapiens OX=9606 GN=CAPZA2 PE=1 SV=3	5216	6	337.434	354.882	370.624	385.833	450.848	385.897	407.236	399.145	378.583	370.732	462.862	458.229	391.399	454.98	402.598	438.707	0.270128	1.27691	0.187075		0.254498	1.76236	0.111109		0.193938	1.12195	0.128949		0.080997	0.739743	0.573189
tr|B1AK88|B1AK88_HUMAN	CAPZB	F-actin-capping protein subunit beta OS=Homo sapiens OX=9606 GN=CAPZB PE=1 SV=1	4464	9	432.809	330.419	546.375	502.371	400.775	508.884	376.407	478.114	417.327	347.953	381.389	359.705	354.573	342.503	334.255	352.372	-0.286115	0.770633	0.373799		-0.376113	1.00843	0.264206		-0.0666938	0.118868	0.855736		-0.115026	0.21968	0.883146
sp|Q9BWT7|CAR10_HUMAN	CARD10	Caspase recruitment domain-containing protein 10 OS=Homo sapiens OX=9606 GN=CARD10 PE=1 SV=2	2973	1	16.4502	17.2914	16.1475	14.5658	13.0083	13.0396	14.6229	15.9666	19.4119	22.837	19.5443	22.8977	16.246	17.5055	21.1531	13.5565	0.268498	0.715412	0.399701		0.0903735	0.167354	0.819828		-0.24866	1.60453	0.0545798		0.25561	0.652939	0.620746
sp|Q9BXL7|CAR11_HUMAN	CARD11	Caspase recruitment domain-containing protein 11 OS=Homo sapiens OX=9606 GN=CARD11 PE=1 SV=3	4063	10	338.996	349.387	380.825	380.751	370.039	401.92	372.111	344.246	362.086	366.177	426.096	365.155	381.547	362.593	406.865	403.855	0.107832	0.600302	0.473018		0.109562	0.738085	0.381679		0.0740887	0.591544	0.355281		-0.0185797	0.135812	0.933023
sp|Q96LW7-2|CAR19_HUMAN	CARD19	Isoform 2 of Caspase recruitment domain-containing protein 19 OS=Homo sapiens OX=9606 GN=CARD19	2581	2	144.845	136.795	140.798	130.796	124.43	173.587	150.909	134.4	159.26	163.193	154.995	153.583	157.264	162.661	134.65	125.987	0.167942	2.02771	0.0798208		0.0212515	0.0614647	0.934298		0.101356	0.263404	0.677548		0.134631	0.581831	0.660785
sp|Q9BX69|CARD6_HUMAN	CARD6	Caspase recruitment domain-containing protein 6 OS=Homo sapiens OX=9606 GN=CARD6 PE=1 SV=2	4152	6	428.652	415.893	461.167	443.91	422.068	432.397	420.351	438.777	428.028	421.882	446.777	456.319	458.319	431.28	462.479	446.115	0.0540893	0.713173	0.400822		0.0305822	0.290272	0.705539		-0.0407518	0.514128	0.416066		-0.0252164	0.282941	0.845533
sp|Q9Y2G2-5|CARD8_HUMAN	CARD8	Isoform 5 of Caspase recruitment domain-containing protein 8 OS=Homo sapiens OX=9606 GN=CARD8	5884	2	44.1892	39.4678	42.3403	34.377	30.2375	37.6698	26.9967	28.6823	36.1809	35.1454	40.5418	32.7073	32.7949	27.4931	37.7291	33.9	-0.182797	0.639182	0.44904		-0.28495	0.810616	0.342927		-0.349451	0.947722	0.179594		-0.267386	0.951328	0.475513
sp|Q9Y2V2|CHSP1_HUMAN	CARHSP1	Calcium-regulated heat-stable protein 1 OS=Homo sapiens OX=9606 GN=CARHSP1 PE=1 SV=2	3203	1	13.877	15.3294	15.096	16.241	11.9527	18.5986	13.2673	15.6185	16.2414	12.2972	15.6214	16.086	17.6041	11.4559	20.1007	14.6848	0.119379	0.812697	0.350572		-0.0098142	0.0128846	0.98517		-0.0755658	0.133065	0.836174		-0.0486137	0.128195	0.935531
sp|Q86X55|CARM1_HUMAN	CARM1	Histone-arginine methyltransferase CARM1 OS=Homo sapiens OX=9606 GN=CARM1 PE=1 SV=3	1637	9	1190.05	1238.49	1153.4	1170.69	1270.61	1178.93	1183.64	1153.56	1138.13	1157.39	1096.31	1112.94	1136.27	1138.52	1233.56	1208.95	-0.0911016	1.69922	0.110667		0.00636659	0.0528013	0.941877		0.0271958	0.25778	0.684385		-0.0470029	0.916497	0.491076
sp|Q5VZK9|CARL1_HUMAN	CARMIL1	F-actin-uncapping protein LRRC16A OS=Homo sapiens OX=9606 GN=CARMIL1 PE=1 SV=1	2241	9	472.817	517.88	502.922	523.168	515.16	495.088	489.458	513.25	468.819	483.396	560.444	551.031	460.468	554.821	549.437	540.347	0.0510577	0.19421	0.816535		0.121744	1.54511	0.140354		-0.0115803	0.106395	0.873708		-0.0455777	0.383857	0.779393
sp|Q8N4J0|CARME_HUMAN	CARNMT1	Carnosine N-methyltransferase OS=Homo sapiens OX=9606 GN=CARNMT1 PE=1 SV=1	4201	5	1550.37	1601.68	1607.72	1670.27	1498.44	1490.15	1480.74	1524.21	1458.48	1508.49	1365.15	1368.24	1302.62	1395.87	1446.33	1412.5	-0.256725	3.19313	0.0202198	+	-0.180387	2.92439	0.034112	+	-0.109245	1.87223	0.03482	+	-0.102447	1.7634	0.186621
sp|A5YM72-3|CRNS1_HUMAN	CARNS1	Isoform 3 of Carnosine synthase 1 OS=Homo sapiens OX=9606 GN=CARNS1	5271	1	57.6292	49.0167	59.1157	57.781	69.0056	61.4959	64.6617	66.5229	58.8726	59.3299	83.0342	80.1687	75.4332	81.0273	70.7317	74.2276	0.512096	2.93147	0.030176	+	0.432354	2.40746	0.0556679		0.221486	1.42576	0.0748749		0.141516	0.80875	0.53799
sp|P49589-3|SYCC_HUMAN	CARS	Isoform 3 of Cysteine--tRNA ligase, cytoplasmic OS=Homo sapiens OX=9606 GN=CARS	2188	14	1495.07	1493.04	1529.89	1581.2	1661.9	1631.35	1603.96	1539.7	1458.14	1580.54	1501.3	1484.09	1440.17	1469.09	1502.24	1452.5	-0.0475517	0.879888	0.321177		-0.0480363	0.987905	0.271982		0.0986176	2.00331	0.0289593	+	0.000836989	0.00688895	0.996404
sp|Q9HA77|SYCM_HUMAN	CARS2	Probable cysteine--tRNA ligase, mitochondrial OS=Homo sapiens OX=9606 GN=CARS2 PE=1 SV=1	336	4	226.51	240.513	243.234	240.408	199.075	222.855	250.088	255.028	242.805	251.325	252.82	275.929	310.835	252.619	243.12	258.08	0.231139	0.970451	0.286887		0.0804368	1.15392	0.218185		-0.0910954	0.355778	0.576455		0.0716228	1.14499	0.396799
sp|O15234|CASC3_HUMAN	CASC3	Protein CASC3 OS=Homo sapiens OX=9606 GN=CASC3 PE=1 SV=2	7350	3	129.387	136.551	135.222	123.869	124.51	117.739	121.078	110.799	126.734	118.949	128.593	130.877	126.323	130.11	140.791	142.216	-0.0286058	0.333215	0.690001		0.0691375	0.602004	0.460401		-0.115389	1.4635	0.0692058		-0.144622	0.987473	0.45964
sp|Q6P4E1|CASC4_HUMAN	CASC4	Protein CASC4 OS=Homo sapiens OX=9606 GN=CASC4 PE=1 SV=2	5859	8	347.823	364.319	366.66	362.123	324.901	323.579	345.372	362.196	377.573	387.474	316.772	335.876	290.846	320.612	334.19	373.274	-0.198077	1.14474	0.228527		-0.0747089	0.428724	0.587404		-0.121196	1.45005	0.0711386		0.060589	0.814342	0.535647
tr|A0A2R8YFN5|A0A2R8YFN5_HUMAN	CASK	Peripheral plasma membrane protein CASK OS=Homo sapiens OX=9606 GN=CASK PE=1 SV=1	781	1	102.014	96.8793	92.5695	116.466	101.132	85.7345	97.002	107.25	103.706	92.1966	108.438	102.588	95.042	130.449	115.459	141.825	0.00390349	0.0144668	0.985711		0.342106	1.46757	0.153554		-0.106128	0.462928	0.465589		-0.0107988	0.038015	0.982954
tr|A0A2R8YEK3|A0A2R8YEK3_HUMAN	CASK	Peripheral plasma membrane protein CASK OS=Homo sapiens OX=9606 GN=CASK PE=1 SV=1	781	10	1395.87	1536.54	1368.76	1338.34	1427.41	1453.45	1576.18	1429.58	1410.33	1424.2	1560.8	1637.76	1592.64	1631.83	1507.38	1524.66	0.181602	1.72953	0.10622		0.142133	1.27073	0.19216		0.0762302	0.558387	0.381011		0.0137176	0.110092	0.947246
sp|Q8WXE0|CSKI2_HUMAN	CASKIN2	Caskin-2 OS=Homo sapiens OX=9606 GN=CASKIN2 PE=1 SV=2	1640	9	436.004	416.052	448.741	461.968	381.183	374.077	381.832	451.658	412.1	438.384	431.898	408.182	412.345	430.521	448.075	427.355	-0.0774436	0.934465	0.297252		-0.0169423	0.167903	0.819294		-0.216443	2.33406	0.0168384	+	-0.0218885	0.163936	0.915063
sp|P29466|CASP1_HUMAN	CASP1	Caspase-1 OS=Homo sapiens OX=9606 GN=CASP1 PE=1 SV=1	2334	4	237.819	225.436	253.748	251	200.956	186.815	206.769	246.376	242.216	249.149	227.132	232.847	220.435	222.653	222.612	247.734	-0.0923276	0.986653	0.280371		-0.0673763	0.449543	0.571387		-0.287913	2.24491	0.0189057	+	0.0246384	0.233014	0.875591
sp|Q92851-4|CASPA_HUMAN	CASP10	Isoform D of Caspase-10 OS=Homo sapiens OX=9606 GN=CASP10	3349	3	88.6106	82.6227	72.8538	77.1009	83.2736	79.3402	70.6068	82.2689	68.7458	68.615	97.4772	77.4894	80.5475	78.2775	85.8362	82.8651	0.0815255	0.269298	0.745129		0.0388739	0.210599	0.779703		-0.0462029	0.190764	0.764389		-0.134728	0.559101	0.671338
sp|P42575|CASP2_HUMAN	CASP2	Caspase-2 OS=Homo sapiens OX=9606 GN=CASP2 PE=1 SV=2	669	3	221.879	235.197	210.418	221.553	224.264	195.33	198.524	208.985	213.066	204.018	229.126	234.019	218.555	209.622	218.952	221.332	0.0324496	0.306955	0.713223		-0.0362659	0.383532	0.627003		-0.110996	0.671307	0.303363		-0.0900061	1.17148	0.381666
sp|P42574|CASP3_HUMAN	CASP3	Caspase-3 OS=Homo sapiens OX=9606 GN=CASP3 PE=1 SV=2	6681	3	59.856	64.4352	62.3621	62.3443	69.3185	64.128	64.6464	56.4003	76.1447	66.5333	61.6448	73.7684	63.6348	67.3417	51.1098	59.3445	0.0880314	0.413339	0.620582		-0.0794966	0.249558	0.740284		0.0846869	0.907652	0.19394		0.0819397	0.235174	0.873658
sp|P49662|CASP4_HUMAN	CASP4	Caspase-4 OS=Homo sapiens OX=9606 GN=CASP4 PE=1 SV=1	3021	5	232.433	231.936	243.485	252.379	206.224	217.618	218.569	228.595	248.122	232.414	232.117	232.974	208.904	213.278	217.261	236.297	-0.0965379	0.711039	0.402509		-0.11157	0.935026	0.289196		-0.164459	2.02971	0.0277002	+	-0.0223115	0.183973	0.90275
sp|P55212|CASP6_HUMAN	CASP6	Caspase-6 OS=Homo sapiens OX=9606 GN=CASP6 PE=1 SV=2	6681	3	85.2446	100.814	98.8958	99.8371	91.7336	77.9597	85.5894	94.1398	101.335	91.2944	99.6717	96.2615	94.1168	92.6962	97.9907	97.5552	0.0101856	0.0565875	0.948175		0.00111186	0.00581156	0.992378		-0.176809	0.952381	0.178008		-0.00721552	0.0339723	0.984806
tr|A0A0A0MRL7|A0A0A0MRL7_HUMAN	CASP7	Caspase-7 OS=Homo sapiens OX=9606 GN=CASP7 PE=1 SV=1	3895	3	750.061	725.189	746.997	741.376	774.607	746.207	753.901	717.672	711.588	691.303	733.934	701.816	719.352	704.502	713.844	721.088	-0.0446879	0.916043	0.304709		-0.0550389	1.88264	0.10057		0.0333036	0.778957	0.246368		-0.0679399	1.53059	0.263282
sp|Q14790-4|CASP8_HUMAN	CASP8	Isoform 4 of Caspase-8 OS=Homo sapiens OX=9606 GN=CASP8	2995	1	17.2832	14.4132	19.5199	21.9665	18.347	18.168	16.2982	13.9386	18.4909	14.7491	16.1535	15.9529	19.5803	15.0369	19.4328	18.1107	-0.0758968	0.181827	0.827134		-0.0529719	0.114376	0.877872		-0.0403675	0.103021	0.878071		-0.212077	0.533336	0.685885
sp|Q14790-9|CASP8_HUMAN	CASP8	Isoform 9 of Caspase-8 OS=Homo sapiens OX=9606 GN=CASP8	2995	9	832.243	822.655	853.169	823.801	871.536	795.759	818.822	782.348	764.556	837.482	852.174	833.64	806.377	841.101	828.554	816.274	-0.00409592	0.052937	0.951037		-0.00746214	0.162931	0.823557		-0.00829105	0.068402	0.917607		-0.068608	0.661294	0.616176
sp|Q9UKL3|C8AP2_HUMAN	CASP8AP2	CASP8-associated protein 2 OS=Homo sapiens OX=9606 GN=CASP8AP2 PE=1 SV=1	7847	3	58.8461	73.5205	66.2771	70.381	49.7007	54.0371	53.3901	63.3913	54.6695	66.8668	69.9701	72.6476	69.6611	63.5556	72.0423	65.7282	0.0779715	0.455325	0.588734		-0.000238827	0.000893724	0.998545		-0.356768	2.0724	0.0261807	+	-0.125927	0.497204	0.709049
tr|F8VVS7|F8VVS7_HUMAN	CASP9	Caspase-9 OS=Homo sapiens OX=9606 GN=CASP9 PE=1 SV=1	7360	1	50.9814	58.945	57.9944	58.0248	49.5394	46.5135	49.3763	55.7052	55.4294	53.2986	56.7799	59.3084	49.2123	48.5687	54.3802	55.737	-0.0379357	0.146948	0.859826		-0.0948997	0.539634	0.501237		-0.218799	1.85664	0.0355039	+	-0.0412939	0.320079	0.822232
sp|P20810-6|ICAL_HUMAN	CAST	Isoform 6 of Calpastatin OS=Homo sapiens OX=9606 GN=CAST	56	14	1737.55	1631.55	1813.11	1790.88	1767.15	1693.45	1668.64	1765.19	1644.22	1781.97	1908.87	1792.82	1755.94	1788.32	1873.41	1869.25	0.0617895	0.564865	0.499982		0.0816355	0.991055	0.270792		-0.027254	0.262703	0.678208		-0.0103749	0.0734807	0.964374
sp|A6NHX0|CAST2_HUMAN	CASTOR2	Cytosolic arginine sensor for mTORC1 subunit 2 OS=Homo sapiens OX=9606 GN=CASTOR2 PE=1 SV=3	4954	2	125.927	123.46	128.591	134.236	90.1133	92.7567	96.9073	131.348	130.926	131.361	119.269	118.623	110.882	118.449	139.207	140.938	-0.139505	1.52806	0.135412		0.0494713	0.214897	0.77427		-0.457377	3.71067	0.00195652	+	0.0358462	0.585369	0.658169
sp|P04040|CATA_HUMAN	CAT	Catalase OS=Homo sapiens OX=9606 GN=CAT PE=1 SV=3	1008	10	769.135	781.138	749.104	720.211	876.314	793.653	785.367	766.577	742.772	720.665	687.312	667.964	771.005	805.864	772.535	760.309	-0.0931081	0.558574	0.504454		0.0466409	0.599356	0.462359		0.115508	0.877861	0.204992		-0.0220403	0.242998	0.867887
sp|Q03135|CAV1_HUMAN	CAV1	Caveolin-1 OS=Homo sapiens OX=9606 GN=CAV1 PE=1 SV=4	2595	6	231.423	246.74	247.108	229.549	242.03	274.653	289.158	233.853	253.895	236.418	256.615	237.342	257.361	250.329	234.214	241.681	0.0690885	0.653925	0.438557		0.0205519	0.200895	0.786627		0.167184	0.831259	0.222764		0.0160243	0.124929	0.936249
sp|P51636|CAV2_HUMAN	CAV2	Caveolin-2 OS=Homo sapiens OX=9606 GN=CAV2 PE=1 SV=2	3822	1	27.2238	35.0106	28.2244	23.4747	34.5153	30.5356	33.5814	22.1682	25.381	22.6398	29.7728	39.3745	49.5305	27.8302	34.3397	29.4648	0.458014	0.825203	0.344089		0.109996	0.305244	0.692029		0.219953	0.780665	0.24537		-0.271477	0.971929	0.462986
sp|Q6NZI2|CAVN1_HUMAN	CAVIN1	Caveolae-associated protein 1 OS=Homo sapiens OX=9606 GN=CAVIN1 PE=1 SV=1	3299	3	45.9055	47.0242	52.916	48.3131	42.5766	56.2395	49.0348	37.7914	46.0953	43.3311	43.3023	50.2735	49.424	44.3466	46.6179	40.6611	-0.0272294	0.12115	0.884711		-0.145928	0.943705	0.28595		0.0147696	0.0390727	0.95447		-0.197687	0.893911	0.500913
sp|O95810|CAVN2_HUMAN	CAVIN2	Caveolae-associated protein 2 OS=Homo sapiens OX=9606 GN=CAVIN2 PE=1 SV=3	5506	2	129.547	131.127	115.912	108.026	115.355	119.382	125.203	128.063	135.53	130.948	126.918	152.106	156.647	124.807	140.045	148.005	0.259951	1.03882	0.262868		0.184866	0.90511	0.302976		-0.0102339	0.0468156	0.944444		0.122608	0.78317	0.549965
tr|A0A140LJL2|A0A140LJL2_HUMAN	CBARP	Voltage-dependent calcium channel beta subunit-associated regulatory protein OS=Homo sapiens OX=9606 GN=CBARP PE=1 SV=1	539	1	76.1385	89.6851	94.4188	82.5453	73.9707	76.2552	90.1205	96.1702	95.4902	97.1057	87.9724	83.5371	93.0607	100.595	90.91	89.4216	0.0447747	0.216054	0.798129		0.130744	0.719275	0.391241		-0.0978903	0.367199	0.565999		0.172394	1.07144	0.427047
sp|Q13951-2|PEBB_HUMAN	CBFB	Isoform 2 of Core-binding factor subunit beta OS=Homo sapiens OX=9606 GN=CBFB	2845	7	1244.63	1270.1	1274.56	1266.81	1194.74	1152.14	1151.59	1221.44	1287.66	1269.72	1159.69	1094.26	1092.53	1212.09	1225.54	1222.59	-0.180842	1.74515	0.104329		-0.0510129	2.54372	0.0483519	+	-0.116418	1.9455	0.0319555	+	-0.00534957	0.0752119	0.963447
sp|P22681|CBL_HUMAN	CBL	E3 ubiquitin-protein ligase CBL OS=Homo sapiens OX=9606 GN=CBL PE=1 SV=2	2002	5	149.297	144.343	151.714	173.42	158.961	159.713	171.118	145.583	171.492	163.053	152.538	129.834	152.986	146.011	153.37	146.183	-0.0927488	0.403387	0.629825		-0.0555381	0.370014	0.639515		0.0805543	0.53693	0.396409		0.0492804	0.211634	0.889206
tr|H0Y3L9|H0Y3L9_HUMAN	CBLB	E3 ubiquitin-protein ligase CBL-B OS=Homo sapiens OX=9606 GN=CBLB PE=1 SV=1	2002	3	95.3506	99.4908	114.043	111.011	100.595	105.857	92.5447	120.738	126.966	116.356	96.4865	92.7315	90.1157	105.217	110.34	114.998	-0.169597	1.1829	0.215268		0.0729201	0.441494	0.577957		-0.0730915	0.373123	0.559397		0.212232	1.45536	0.285699
sp|Q75N03|HAKAI_HUMAN	CBLL1	E3 ubiquitin-protein ligase Hakai OS=Homo sapiens OX=9606 GN=CBLL1 PE=1 SV=1	2854	2	126.753	147.321	132.939	126.371	122.628	116.565	120.174	119.659	126.232	118.06	128.183	115.827	139.831	121.685	116.367	107.72	-0.0610663	0.256135	0.757807		-0.209313	1.43814	0.159049		-0.152171	1.26971	0.0980455		-0.134178	1.10226	0.412248
sp|P16152|CBR1_HUMAN	CBR1	Carbonyl reductase [NADPH] 1 OS=Homo sapiens OX=9606 GN=CBR1 PE=1 SV=3	1416	10	845.33	837.533	881.062	894.305	890.624	806.347	813.001	906.429	905.355	886.794	887.407	999.247	817.94	887.35	806.295	846.969	0.0560597	0.238524	0.774424		-0.0303777	0.257901	0.733862		-0.0482596	0.380179	0.551381		0.0576745	1.08857	0.420613
sp|O75828|CBR3_HUMAN	CBR3	Carbonyl reductase [NADPH] 3 OS=Homo sapiens OX=9606 GN=CBR3 PE=1 SV=3	1416	3	379.222	380.461	393.088	404.492	373.034	381.081	389.074	407.507	405.602	401.965	379.766	398.403	374.648	368.077	386.062	359.13	-0.0188137	0.211265	0.804328		-0.0693232	0.849313	0.324423		-0.0306222	0.487742	0.440498		0.0575478	1.12518	0.39957
sp|Q8N4T8|CBR4_HUMAN	CBR4	Carbonyl reductase family member 4 OS=Homo sapiens OX=9606 GN=CBR4 PE=1 SV=3	3410	1	76.7049	81.0012	79.6699	83.32	57.2958	85.4841	83.3361	76.9744	84.8525	87.9944	91.7104	98.3397	94.0807	79.8751	76.2318	83.5478	0.240429	2.6106	0.0380488	+	-0.00557636	0.0413834	0.955083		-0.111481	0.213303	0.736194		0.0530927	0.332648	0.814667
sp|Q8IUF1|CBWD2_HUMAN	CBWD2	COBW domain-containing protein 2 OS=Homo sapiens OX=9606 GN=CBWD2 PE=2 SV=1	7745	2	160.821	179.785	195.062	197.216	191.283	194.224	175.952	181.526	192.632	178.398	166.129	176.138	160.588	171	186.238	188.84	-0.124735	0.749692	0.384596		-0.00608999	0.0253131	0.971183		0.0340112	0.15909	0.803942		0.0115149	0.0524639	0.975138
sp|Q5RIA9|CBWD5_HUMAN	CBWD5	COBW domain-containing protein 5 OS=Homo sapiens OX=9606 GN=CBWD5 PE=2 SV=1	7745	1	32.8568	36.5019	37.6982	35.9233	32.5178	38	38.1686	31.3656	33.4185	36.748	39.466	30.8906	27.7586	44.7583	38.5821	38.351	-0.142324	0.35013	0.674948		0.180556	0.9477	0.284944		0.0173103	0.068416	0.917686		-0.0800628	0.42779	0.749871
sp|P83916|CBX1_HUMAN	CBX1	Chromobox protein homolog 1 OS=Homo sapiens OX=9606 GN=CBX1 PE=1 SV=1	4016	4	511.381	524.283	515.57	490.69	503.7	475.044	534.508	504.503	513.48	462.449	525.969	567.174	514.209	532.766	595.396	618.866	0.0689435	0.612413	0.467333		0.187562	1.04583	0.25206		-0.0184853	0.122974	0.849928		-0.0499427	0.393126	0.772056
sp|Q14781|CBX2_HUMAN	CBX2	Chromobox protein homolog 2 OS=Homo sapiens OX=9606 GN=CBX2 PE=1 SV=2	6827	1	18.2215	17.7715	17.3847	21.3707	18.2658	25.2389	18.4829	19.7802	19.4689	20.347	26.8704	24.9143	21.0674	19.4286	22.5478	17.5069	0.375503	1.35692	0.168572		0.0825325	0.258644	0.73277		0.133163	0.311962	0.62183		0.0928499	0.5744	0.66335
sp|Q13185|CBX3_HUMAN	CBX3	Chromobox protein homolog 3 OS=Homo sapiens OX=9606 GN=CBX3 PE=1 SV=4	4016	7	618.515	581.338	641.954	592.028	590.091	579.481	593.772	623.135	631.124	595.315	598.271	534.113	585.104	544.652	625.555	545.105	-0.0885346	0.659581	0.435785		-0.0917451	0.517675	0.515524		-0.0488776	0.639253	0.322731		0.0196269	0.184986	0.902031
sp|O00257|CBX4_HUMAN	CBX4	E3 SUMO-protein ligase CBX4 OS=Homo sapiens OX=9606 GN=CBX4 PE=1 SV=3	238	6	320.953	305.164	308.743	339.643	272.14	259.332	289.215	298.885	292.905	284.809	332.475	332.724	264.346	304.033	291.159	297.633	-0.04726	0.14461	0.863175		-0.0974033	1.20207	0.207901		-0.220163	1.75257	0.0426354	+	-0.12392	1.51063	0.266698
sp|P45973|CBX5_HUMAN	CBX5	Chromobox protein homolog 5 OS=Homo sapiens OX=9606 GN=CBX5 PE=1 SV=1	4016	6	925.427	1123.76	976.612	806.956	922.597	887.45	1094.38	842.133	897.096	823.509	910.701	893.324	916.435	1072.71	733.633	729.021	-0.069433	0.272374	0.742603		-0.195428	0.38089	0.62959		0.0189719	0.0485175	0.942185		-0.156466	0.665432	0.613044
sp|O95503|CBX6_HUMAN	CBX6	Chromobox protein homolog 6 OS=Homo sapiens OX=9606 GN=CBX6 PE=1 SV=1	5563	1	112.798	96.2244	111.47	121.316	64.4936	74.9045	90.8218	93.8516	97.3985	97.722	120.091	128.599	110.438	93.1852	101.622	97.5617	0.118338	0.573984	0.49355		-0.176486	1.07907	0.239883		-0.534589	1.35041	0.0848817		-0.192684	1.17596	0.381335
sp|Q9HC52|CBX8_HUMAN	CBX8	Chromobox protein homolog 8 OS=Homo sapiens OX=9606 GN=CBX8 PE=1 SV=3	5903	2	171.667	177.638	188.576	178.367	204.533	209.686	204.762	189.802	184.122	178.67	200.923	215.149	211.883	187.003	185.75	195.675	0.225445	2.47158	0.0486066	+	0.0819908	1.12199	0.226427		0.2052	2.58308	0.010961	+	0.0411813	0.488405	0.711942
sp|Q6P1N0|C2D1A_HUMAN	CC2D1A	Coiled-coil and C2 domain-containing protein 1A OS=Homo sapiens OX=9606 GN=CC2D1A PE=1 SV=1	3003	12	562.36	551.011	552.403	562.651	498.864	482.377	498.6	592.948	588.005	573.346	537.672	550.73	518.124	539.311	543.055	542.719	-0.0574278	0.841176	0.336507		-0.0404104	1.97451	0.0908008		-0.175654	2.65621	0.0100767	+	0.0698292	1.66658	0.215273
sp|Q5T0F9-2|C2D1B_HUMAN	CC2D1B	Isoform 2 of Coiled-coil and C2 domain-containing protein 1B OS=Homo sapiens OX=9606 GN=CC2D1B	1140	5	397.888	390.111	438.585	390.458	420.859	407.745	379.998	380.223	390.343	406.318	460.082	449.267	413.381	418.688	420.641	416.965	0.125411	0.977824	0.284582		0.0525627	0.547488	0.496122		-0.0045691	0.0260253	0.968928		-0.0421686	0.366958	0.790519
sp|Q8IX12|CCAR1_HUMAN	CCAR1	Cell division cycle and apoptosis regulator protein 1 OS=Homo sapiens OX=9606 GN=CCAR1 PE=1 SV=2	4563	11	906.339	861.412	920.06	904.822	915.82	878.731	881.956	862.627	861.972	901.659	887.581	871.145	830.849	838.773	875.962	847.808	-0.057403	0.749165	0.384748		-0.0722336	1.30331	0.1861		-0.00946492	0.124806	0.847306		-0.0368758	0.562474	0.668852
sp|Q8N163-2|CCAR2_HUMAN	CCAR2	Isoform 2 of Cell cycle and apoptosis regulator protein 2 OS=Homo sapiens OX=9606 GN=CCAR2	149	15	1352.3	1336.48	1386.26	1399.19	1405.47	1321.9	1379.21	1309.99	1304.27	1344.84	1379.76	1385.72	1399.04	1332.19	1377.71	1361.02	0.0207526	0.554785	0.508143		-0.0121574	0.23187	0.757609		9.18006e-05	0.000975514	0.998799		-0.0523332	1.27835	0.337848
sp|Q96A19|C102A_HUMAN	CCDC102A	Coiled-coil domain-containing protein 102A OS=Homo sapiens OX=9606 GN=CCDC102A PE=1 SV=2	3198	3	328.198	335.068	360.442	361.166	323.877	306.128	344.734	343.703	337.51	317.208	336.706	342.693	335.125	354.66	344.476	343.652	-0.0326605	0.361938	0.666097		0.00690045	0.0620943	0.933272		-0.0920075	0.683002	0.296865		-0.0565217	0.506976	0.703769
sp|Q96NT0|CC115_HUMAN	CCDC115	Coiled-coil domain-containing protein 115 OS=Homo sapiens OX=9606 GN=CCDC115 PE=1 SV=1	1837	1	11.6235	14.1911	14.0069	12.1287	14.0451	9.2621	11.1318	11.3485	12.4135	15.9646	13.714	15.3454	12.7829	13.188	13.6966	17.7308	0.104242	0.429018	0.608353		0.188119	0.52093	0.514302		-0.193593	0.412212	0.51827		0.0181143	0.0365684	0.983436
sp|Q8IWD4|CC117_HUMAN	CCDC117	Coiled-coil domain-containing protein 117 OS=Homo sapiens OX=9606 GN=CCDC117 PE=1 SV=1	1493	1	8.87501	8.60675	9.68233	9.86084	7.89921	7.87868	9.80756	13.7008	6.89263	8.15083	6.57247	7.88772	8.75648	9.17926	9.35649	8.19876	-0.265939	0.835185	0.33859		-0.0548202	0.292815	0.702126		-0.123552	0.436972	0.492221		-0.0120073	0.0124444	0.994447
tr|J3KR35|J3KR35_HUMAN	CCDC12	Coiled-coil domain containing 12, isoform CRA_a OS=Homo sapiens OX=9606 GN=CCDC12 PE=1 SV=1	4717	1	11.0954	14.5881	16.8117	12.6564	11.9911	13.3739	12.6936	11.0677	13.4966	15.9516	18.8449	11.2879	17.3799	11.3032	12.2478	15.9806	0.182769	0.272367	0.742484		-0.0641631	0.118287	0.874189		-0.104193	0.307352	0.626059		-0.0284708	0.049131	0.977962
sp|Q96CT7|CC124_HUMAN	CCDC124	Coiled-coil domain-containing protein 124 OS=Homo sapiens OX=9606 GN=CCDC124 PE=1 SV=1	2989	5	480.878	436.167	463.788	465.687	472.518	437.117	459.739	439.632	413.23	432.386	449.606	459.528	407.008	384.625	410.749	419.826	-0.074554	0.512875	0.540839		-0.188677	1.7931	0.108654		-0.0161098	0.135824	0.832362		-0.107324	1.36482	0.310888
sp|Q96BQ5|CC127_HUMAN	CCDC127	Coiled-coil domain-containing protein 127 OS=Homo sapiens OX=9606 GN=CCDC127 PE=1 SV=1	3411	2	360.653	431.161	366.708	355.711	326.439	429.045	404.685	326.744	417.512	378.887	392.111	440.183	469.865	369.833	344.116	350.462	0.197827	0.947805	0.292705		-0.0897015	0.558248	0.488033		0.0255368	0.0641373	0.923002		-0.0187952	0.0528196	0.975162
sp|P13994|CC130_HUMAN	CCDC130	Coiled-coil domain-containing protein 130 OS=Homo sapiens OX=9606 GN=CCDC130 PE=1 SV=2	2075	1	45.111	52.3981	54.1322	52.1332	42.4331	36.2158	50.0513	52.6802	50.5907	56.1591	57.204	57.0945	57.7469	51.5679	49.7362	50.5947	0.174316	1.23514	0.198711		-0.00550215	0.0302959	0.967364		-0.257015	0.729451	0.269616		0.0631302	0.36866	0.790046
sp|Q9H6E4|CC134_HUMAN	CCDC134	Coiled-coil domain-containing protein 134 OS=Homo sapiens OX=9606 GN=CCDC134 PE=1 SV=1	5084	6	382.89	405.523	398.068	399.469	378.913	389.279	400.893	385.003	373.585	403.673	396.018	384.578	392.703	392.925	410.965	405.601	-0.0195261	0.387627	0.642441		0.0241572	0.397343	0.614805		-0.0249902	0.354006	0.578347		-0.0337886	0.371318	0.78693
sp|Q6PK04|CC137_HUMAN	CCDC137	Coiled-coil domain-containing protein 137 OS=Homo sapiens OX=9606 GN=CCDC137 PE=1 SV=1	523	5	434.817	403.865	431.014	419.321	456.55	476.817	476.134	455.857	428.828	413.98	504.831	442.581	354.29	439.42	462.639	432.511	0.0247064	0.0533464	0.950881		0.0752236	0.946156	0.285143		0.154341	2.34221	0.0164661	+	0.0353294	0.298697	0.836036
sp|Q49A88|CCD14_HUMAN	CCDC14	Coiled-coil domain-containing protein 14 OS=Homo sapiens OX=9606 GN=CCDC14 PE=1 SV=3	2543	2	31.3709	29.4427	26.0904	26.226	17.8442	17.71	18.8346	33.7645	23.925	31.4046	20.9685	26.7405	21.6953	25.332	29.5372	24.2963	-0.293919	1.02376	0.268187		-0.10072	0.396188	0.615843		-0.637662	3.07191	0.00580541	+	0.0595373	0.128562	0.935307
tr|A0A0U1RQD2|A0A0U1RQD2_HUMAN	CCDC149	Coiled-coil domain-containing protein 149 OS=Homo sapiens OX=9606 GN=CCDC149 PE=1 SV=1	3240	1	14.1618	10.2293	14.8002	10.4296	11.0732	13.4198	9.08023	10.1417	12.4489	12.599	10.4585	10.3179	8.50712	13.6553	11.6524	11.0863	-0.331397	0.950854	0.291297		-0.0172978	0.0352028	0.961797		-0.146174	0.274785	0.662454		-0.0670441	0.144995	0.927803
sp|Q6PII3|CC174_HUMAN	CCDC174	Coiled-coil domain-containing protein 174 OS=Homo sapiens OX=9606 GN=CCDC174 PE=1 SV=3	4818	3	75.7496	76.2891	72.0744	67.5569	71.3315	64.7584	74.2322	66.8039	75.8656	73.5052	68.7377	87.423	68.4708	76.742	81.6261	78.1703	0.0302914	0.0835836	0.920309		0.11398	1.17316	0.213368		-0.0573591	0.330207	0.602198		-0.0175015	0.0910552	0.955404
sp|Q7Z3E2|CC186_HUMAN	CCDC186	Coiled-coil domain-containing protein 186 OS=Homo sapiens OX=9606 GN=CCDC186 PE=1 SV=2	1196	2	38.8404	38.6785	44.224	52.2223	45.1834	38.475	45.2034	36.8531	46.9791	47.2425	50.2547	42.5965	35.9693	41.1067	43.4083	41.7512	-0.0207265	0.040816	0.957887		-0.0365923	0.126211	0.866366		-0.0109312	0.0290399	0.965321		0.0083171	0.0178116	0.99236
sp|O60826|CCD22_HUMAN	CCDC22	Coiled-coil domain-containing protein 22 OS=Homo sapiens OX=9606 GN=CCDC22 PE=1 SV=1	17	7	272.586	276.741	275.118	294.987	274.384	291.244	297.788	274.505	255.007	289.79	292.495	307.761	282.725	273.658	271.729	268.705	0.0725532	0.755392	0.382005		-0.0437989	0.719686	0.391339		0.0402493	0.387025	0.544455		-0.0365284	0.234353	0.874622
sp|Q8N4L8|CCD24_HUMAN	CCDC24	Coiled-coil domain-containing protein 24 OS=Homo sapiens OX=9606 GN=CCDC24 PE=1 SV=1	7841	1	16.4502	19.1752	17.4565	20.4279	13.2976	17.6168	17.4276	13.8443	17.6811	12.0509	16.3576	14.355	18.7906	13.6918	17.8427	19.3155	-0.159071	0.518052	0.536372		-0.126778	0.299607	0.697149		-0.196416	0.554753	0.38375		-0.352699	0.832071	0.527625
sp|Q86WR0|CCD25_HUMAN	CCDC25	Coiled-coil domain-containing protein 25 OS=Homo sapiens OX=9606 GN=CCDC25 PE=1 SV=2	6607	2	193.94	224.882	223.859	216.497	191.045	193.232	192.285	207.941	207.984	211.604	220.683	231.347	202.213	211.109	211.673	207.383	0.0222075	0.106765	0.898613		-0.0297213	0.22466	0.764299		-0.157931	1.30331	0.0925195		-0.0357578	0.277861	0.84871
tr|Q86WV7|Q86WV7_HUMAN	CCDC43	CCDC43 protein OS=Homo sapiens OX=9606 GN=CCDC43 PE=1 SV=1	4380	9	1126.76	1159.4	1149.92	1146.41	1022.7	923.577	973.609	1135.32	1126.9	1151.68	1093.4	1103.67	1059.86	1062.88	1105.25	1092.57	-0.0777192	1.52885	0.135383		-0.0760281	1.58167	0.134984		-0.236353	1.57251	0.0580858		-0.00965433	0.317018	0.825016
sp|Q96A33|CCD47_HUMAN	CCDC47	Coiled-coil domain-containing protein 47 OS=Homo sapiens OX=9606 GN=CCDC47 PE=1 SV=1	5835	6	1833.13	2167.23	1727.84	1825.36	2012.16	2149.66	1999.5	2148.44	1944.51	2090.42	1699.18	1908.05	2008.57	2164.28	1996.81	1990.59	-0.0107925	0.0367656	0.961737		0.123099	0.709145	0.397375		0.12567	0.74369	0.262114		0.130335	0.744446	0.569245
sp|Q8IVM0|CCD50_HUMAN	CCDC50	Coiled-coil domain-containing protein 50 OS=Homo sapiens OX=9606 GN=CCDC50 PE=1 SV=1	520	4	226.001	222.557	239.127	245.205	203.526	216.054	215.179	218.341	218.531	234.327	239.16	226.405	235.614	238.583	236.448	242.627	0.00386837	0.0324847	0.967496		0.0376841	0.460773	0.562636		-0.139853	1.63673	0.0517305		-0.059586	0.575367	0.663635
sp|Q96ER9|MITOK_HUMAN	CCDC51	Mitochondrial potassium channel OS=Homo sapiens OX=9606 GN=CCDC51 PE=1 SV=2	4780	4	438.793	484.851	464.509	440.56	350.859	461.42	412.922	435.382	432.274	479.92	394.081	426.918	511.768	454.839	442.526	464.41	-0.0488847	0.148724	0.857744		-0.00935933	0.0841257	0.911617		-0.170585	0.565044	0.376532		-0.0258578	0.162973	0.914914
sp|Q4VC31|CCD58_HUMAN	CCDC58	Coiled-coil domain-containing protein 58 OS=Homo sapiens OX=9606 GN=CCDC58 PE=1 SV=1	7073	5	1370.06	1108.82	1279.16	1372.99	1052.25	1265.44	971.943	1403.99	1235.94	1214.63	1353.2	1103.89	1130.02	1294.35	1331.7	1437.76	-0.102172	0.363962	0.665557		0.0824944	0.419763	0.594314		-0.229925	0.770634	0.249923		0.00460721	0.0157966	0.99368
sp|Q9P031|TAP26_HUMAN	CCDC59	Thyroid transcription factor 1-associated protein 26 OS=Homo sapiens OX=9606 GN=CCDC59 PE=1 SV=2	2955	4	307.53	266.707	305.11	307.489	289.656	310.326	327.816	301.536	278.907	282.137	281.488	283.206	262.903	287.338	299.179	283.208	-0.10331	0.814641	0.349861		-0.0312552	0.219062	0.770145		0.060542	0.354624	0.57778		-0.043625	0.292206	0.83892
sp|Q16204|CCDC6_HUMAN	CCDC6	Coiled-coil domain-containing protein 6 OS=Homo sapiens OX=9606 GN=CCDC6 PE=1 SV=2	1215	6	636.727	625.754	684.284	640.437	636.187	572.5	593.181	662.464	641.034	637.73	618.475	582.25	601.837	620.799	608.516	616.494	-0.105905	1.41528	0.156778		-0.0713112	1.08692	0.238269		-0.107414	0.916612	0.190784		0.00124894	0.012577	0.994413
sp|Q9Y6R9|CCD61_HUMAN	CCDC61	Coiled-coil domain-containing protein 61 OS=Homo sapiens OX=9606 GN=CCDC61 PE=1 SV=3	5925	1	109.095	104.603	112.27	116.41	66.7201	83.2204	80.6795	109.623	110.444	104.284	121.113	121.901	99.9605	90.1956	95.2481	96.3842	0.0429905	0.154843	0.852352		-0.234921	2.49772	0.0498644	+	-0.530349	1.615	0.0536798		-0.0320464	0.3214	0.821681
sp|Q8N9Z2|CC71L_HUMAN	CCDC71L	Coiled-coil domain-containing protein 71L OS=Homo sapiens OX=9606 GN=CCDC71L PE=1 SV=2	5233	1	11.1267	9.94858	10.9223	16.32	11.1524	8.63667	13.1427	12.3956	13.249	11.262	10.7199	10.1323	16.6727	13.2115	17.8949	12.7461	0.0404538	0.0500505	0.952499		0.28534	0.592193	0.466858		-0.131739	0.219014	0.729262		0.0505983	0.106196	0.947927
sp|Q8N4S0|CCD82_HUMAN	CCDC82	Coiled-coil domain-containing protein 82 OS=Homo sapiens OX=9606 GN=CCDC82 PE=1 SV=2	7676	1	229.562	183.756	252.307	243.42	253.35	253.583	265.645	208.035	236.937	216.341	221.766	181.101	200.2	198.163	234.505	222.431	-0.171401	0.596244	0.476512		-0.0506044	0.152987	0.836086		0.190537	0.797768	0.238		-0.0356135	0.11127	0.947354
sp|Q86UT8|CCD84_HUMAN	CCDC84	Coiled-coil domain-containing protein 84 OS=Homo sapiens OX=9606 GN=CCDC84 PE=1 SV=1	6724	2	21.138	31.9805	25.3718	27.2383	28.1522	25.8121	21.1362	30.7906	20.8095	31.7429	26.5638	31.4592	25.2371	27.2476	32.185	25.5735	0.0796897	0.19877	0.814034		0.109249	0.282945	0.711494		-0.0728031	0.158753	0.804345		0.0622486	0.0951075	0.955082
sp|A6NKD9|CC85C_HUMAN	CCDC85C	Coiled-coil domain-containing protein 85C OS=Homo sapiens OX=9606 GN=CCDC85C PE=1 SV=1	333	1	25.9059	28.7037	20.2932	19.5716	19.3894	24.0962	20.6633	24.0908	27.9949	28.6244	25.9711	21.4406	19.5129	24.5815	19.6229	24.925	-0.073842	0.154567	0.852519		-0.0251673	0.050026	0.944147		-0.130687	0.336037	0.596299		0.202562	0.594624	0.651654
sp|Q9H6F5|CCD86_HUMAN	CCDC86	Coiled-coil domain-containing protein 86 OS=Homo sapiens OX=9606 GN=CCDC86 PE=1 SV=1	1363	5	836.877	808.295	811.982	761.805	684.647	667.577	695.441	778.798	824.214	798.045	717.487	731.306	753.961	736.766	729.926	729.505	-0.131719	1.86511	0.0900886		-0.135734	1.79595	0.107994		-0.236951	2.95454	0.00624186	+	-0.00744566	0.0714805	0.963779
sp|Q3V6T2|GRDN_HUMAN	CCDC88A	Girdin OS=Homo sapiens OX=9606 GN=CCDC88A PE=1 SV=2	1611	14	826.558	787.635	801.674	817.495	921.822	880.723	879.56	790.085	765.308	810.192	823.356	811.996	771.663	787.119	803.739	804.103	-0.0110639	0.122801	0.88293		-0.0178208	0.42041	0.593595		0.145269	2.17015	0.0216306	+	-0.0359464	0.552339	0.675518
sp|Q9P219|DAPLE_HUMAN	CCDC88C	Protein Daple OS=Homo sapiens OX=9606 GN=CCDC88C PE=1 SV=3	1517	8	201.049	175.18	188.471	196.159	168.495	170.897	172.675	182.885	191.06	201.421	187.424	190.007	161.397	170.232	191.99	187.061	-0.0846971	0.402173	0.630474		-0.055007	0.33473	0.666442		-0.15439	1.4614	0.0695439		0.0127044	0.07637	0.96309
tr|A0A2R8Y4Z8|A0A2R8Y4Z8_HUMAN	CCDC9	Coiled-coil domain-containing protein 9 OS=Homo sapiens OX=9606 GN=CCDC9 PE=1 SV=1	1732	6	583.074	592.071	614.03	580.985	623.804	572.358	609.94	591.196	606.215	602.304	643.882	601.374	563.367	574.465	584.151	600.998	0.0231464	0.139886	0.868132		-0.0145913	0.218311	0.77103		0.0223278	0.20227	0.74991		0.0180878	0.360723	0.795916
sp|Q7Z6B0|CCD91_HUMAN	CCDC91	Coiled-coil domain-containing protein 91 OS=Homo sapiens OX=9606 GN=CCDC91 PE=1 SV=2	317	6	607.979	623.285	597.353	591.518	673.237	623.82	640.374	600.821	599.632	612.901	625.712	614.657	632.539	587.684	617.014	583.448	0.0454151	1.10769	0.242531		-0.0217472	0.287372	0.707348		0.0936565	1.09575	0.136841		-0.00117428	0.0203607	0.99109
sp|Q567U6|CCD93_HUMAN	CCDC93	Coiled-coil domain-containing protein 93 OS=Homo sapiens OX=9606 GN=CCDC93 PE=1 SV=2	1222	6	486.142	503.434	519.833	483.014	520.677	521.545	515.787	474.854	486.756	480.253	533.448	533.336	477.934	517.531	496.904	515.646	0.0465778	0.314592	0.706008		0.0345078	0.501941	0.527752		0.0608285	1.06061	0.146063		-0.0509976	0.891052	0.502728
sp|Q6ZUT6|CCD9B_HUMAN	CCDC9B	Coiled-coil domain-containing protein 9B OS=Homo sapiens OX=9606 GN=CCDC9B PE=1 SV=1	4253	6	569.488	589.695	584.886	606.233	678.203	661.628	688.809	569.474	600.013	591.903	655.695	643.009	607.917	555.831	561.479	645.056	0.112831	1.28658	0.185172		-0.00331463	0.0146337	0.982757		0.202865	3.30249	0.0043045	+	-0.00108738	0.01234	0.994482
sp|Q8TD31-2|CCHCR_HUMAN	CCHCR1	Isoform 2 of Coiled-coil alpha-helical rod protein 1 OS=Homo sapiens OX=9606 GN=CCHCR1	5462	2	62.1885	51.6678	60.1839	57.2487	53.3416	57.7813	53.6592	59.2088	56.8068	54.3481	54.3683	64.9094	46.6913	51.4963	50.9869	58.5043	-0.0733512	0.180571	0.827953		-0.107087	0.560128	0.486956		-0.0715703	0.45527	0.473016		-0.0234318	0.126792	0.935425
sp|Q9BSQ5-2|CCM2_HUMAN	CCM2	Isoform 2 of Cerebral cavernous malformations 2 protein OS=Homo sapiens OX=9606 GN=CCM2	4552	1	24.4678	20.3038	24.583	25.6446	24.4383	28.763	27.8365	24.6703	22.1191	29.4078	28.8348	20.9937	24.4653	23.9963	30.7103	28.6864	0.0539305	0.128176	0.878131		0.225063	0.79312	0.352127		0.187874	0.880291	0.203806		0.092518	0.257383	0.862516
sp|O00622|CCN1_HUMAN	CCN1	CCN family member 1 OS=Homo sapiens OX=9606 GN=CCN1 PE=1 SV=1	3042	3	269.174	265.004	264.693	263.457	238.095	238.454	267.386	339.827	356.015	325.04	253.598	232.548	241.401	263.897	240.175	237.15	-0.131942	1.19939	0.211013		-0.105823	0.798139	0.350065		-0.101053	0.681003	0.298229		0.356675	2.02744	0.13143
sp|P29279|CCN2_HUMAN	CCN2	CCN family member 2 OS=Homo sapiens OX=9606 GN=CCN2 PE=1 SV=2	4535	4	235.307	236.459	262.292	256.113	178.319	204.001	213.712	344.406	350.258	332.362	270.668	264.793	264.666	267.542	281.399	251.098	0.109165	1.17083	0.217979		0.107522	0.81754	0.339581		-0.319787	1.45487	0.0702801		0.469072	3.56901	0.00847761	+
sp|P48745|CCN3_HUMAN	CCN3	CCN family member 3 OS=Homo sapiens OX=9606 GN=CCN3 PE=1 SV=1	2018	1	108.596	106.655	107.543	120.319	88.892	92.4928	111.588	119.465	120.677	119.656	102.986	97.6416	102.309	96.9142	102.018	120.462	-0.132275	1.38096	0.163049		-0.0618646	0.226017	0.762475		-0.187352	0.707571	0.281342		0.116285	1.19601	0.371495
sp|P20248|CCNA2_HUMAN	CCNA2	Cyclin-A2 OS=Homo sapiens OX=9606 GN=CCNA2 PE=1 SV=2	342	5	292.109	288.751	292.563	304.583	315.792	318.465	325.679	261.027	241.823	285.768	334.863	299.369	311.756	324.774	313.24	281.252	0.0973255	0.781874	0.368357		0.0548771	0.323457	0.676742		0.119875	2.59713	0.0107261	+	-0.166981	0.880589	0.507606
sp|P14635|CCNB1_HUMAN	CCNB1	G2/mitotic-specific cyclin-B1 OS=Homo sapiens OX=9606 GN=CCNB1 PE=1 SV=1	4715	2	24.0587	22.5369	31.3058	22.436	17.6668	27.1951	23.0522	27.8702	28.8115	28.5806	32.3868	28.0064	32.146	28.0848	25.4132	25.8817	0.309161	1.14981	0.226533		0.08966	0.297236	0.698454		-0.156343	0.291967	0.641471		0.194028	0.730838	0.575971
sp|O95067|CCNB2_HUMAN	CCNB2	G2/mitotic-specific cyclin-B2 OS=Homo sapiens OX=9606 GN=CCNB2 PE=1 SV=1	4715	4	108.195	114.476	119.274	112.551	99.655	86.6506	96.1527	112.867	108.717	113.439	134.425	120.204	111.757	123.171	143.086	126.655	0.100833	0.490688	0.557965		0.202765	1.12868	0.223873		-0.272819	1.55109	0.0601799		-0.024345	0.285216	0.843511
sp|P24863|CCNC_HUMAN	CCNC	Cyclin-C OS=Homo sapiens OX=9606 GN=CCNC PE=1 SV=2	5898	1	9.40639	9.78794	7.51726	7.10954	12.255	9.8202	8.50916	12.2953	12.3216	8.01375	8.86325	11.3508	5.75225	8.61449	11.1738	10.4944	-0.00725767	0.00748948	0.992881		0.260635	0.771893	0.362766		0.267204	0.629404	0.328465		0.349058	0.638559	0.6292
sp|P24385|CCND1_HUMAN	CCND1	G1/S-specific cyclin-D1 OS=Homo sapiens OX=9606 GN=CCND1 PE=1 SV=1	1136	5	813.428	790.022	789.327	814.748	646.844	685.142	667.567	793.134	743.4	766.189	866.373	864.131	797.161	850.697	823.122	763.698	0.0704821	0.680134	0.422871		0.0176969	0.129402	0.862416		-0.266977	2.71947	0.0091756	+	-0.0634199	0.896441	0.499776
sp|P30281|CCND3_HUMAN	CCND3	G1/S-specific cyclin-D3 OS=Homo sapiens OX=9606 GN=CCND3 PE=1 SV=2	3261	3	47.7726	45.6663	45.5377	49.8459	46.5854	42.5084	41.7558	42.62	44.2571	52.07	45.7831	55.7016	44.6008	50.5621	51.7036	54.7908	0.0385721	0.127642	0.878571		0.149456	1.5728	0.136205		-0.114762	0.894719	0.198718		-0.0319984	0.119264	0.940384
sp|O95273|CCDB1_HUMAN	CCNDBP1	Cyclin-D1-binding protein 1 OS=Homo sapiens OX=9606 GN=CCNDBP1 PE=1 SV=2	5880	1	14.0046	17.547	18.4876	15.2623	9.28004	11.2244	16.6452	16.1542	12.8592	21.982	16.2925	16.9036	15.1544	11.2803	17.0629	18.4344	-0.0113221	0.0375116	0.960978		-0.089391	0.133647	0.857528		-0.433765	0.666876	0.305961		0.0319304	0.0436474	0.97969
sp|P24864|CCNE1_HUMAN	CCNE1	G1/S-specific cyclin-E1 OS=Homo sapiens OX=9606 GN=CCNE1 PE=1 SV=2	7874	2	73.2645	56.6695	70.8747	63.0739	70.772	71.8576	70.6882	66.4754	64.5914	67.3407	64.5328	44.8137	52.1238	53.2933	54.095	47.0471	-0.302529	0.756526	0.381135		-0.353315	1.68188	0.122724		0.115429	0.576043	0.368127		0.0107136	0.041678	0.981083
sp|P41002|CCNF_HUMAN	CCNF	Cyclin-F OS=Homo sapiens OX=9606 GN=CCNF PE=1 SV=2	5380	1	64.8331	67.693	73.9731	75.6778	51.9302	54.363	54.0518	68.1184	67.1103	66.9496	69.9612	77.9456	65.6788	65.0955	66.5692	78.007	0.0124981	0.0479078	0.953772		-0.0153132	0.0536597	0.942017		-0.397805	2.60975	0.0106845	+	-0.0631006	0.497353	0.708914
tr|A0A2R8YEM2|A0A2R8YEM2_HUMAN	CCNH	Cyclin-H OS=Homo sapiens OX=9606 GN=CCNH PE=1 SV=1	6099	3	392.588	419.377	393.797	359.976	423.009	392.537	428.363	381.981	381.279	401.311	380.106	371.274	369.706	386.892	375.112	409.7	-0.0648993	0.602574	0.472211		-0.00204743	0.0116661	0.98588		0.0841294	0.658091	0.311019		-0.0102979	0.0706486	0.963819
sp|O75909-4|CCNK_HUMAN	CCNK	Isoform 4 of Cyclin-K OS=Homo sapiens OX=9606 GN=CCNK	5956	3	313.767	334.112	329.162	307.337	334.408	292.723	298.501	296.563	319.47	295.748	301.366	294.136	332.501	332.034	325.546	324.13	-0.0550416	0.364552	0.665014		0.0280939	0.387934	0.622771		-0.0592007	0.357048	0.574608		-0.0793653	0.799981	0.542876
sp|Q9UK58|CCNL1_HUMAN	CCNL1	Cyclin-L1 OS=Homo sapiens OX=9606 GN=CCNL1 PE=1 SV=1	2475	2	50.3562	52.8588	62.7235	54.5265	56.2357	55.8599	48.2577	47.2761	52.6121	53.1284	46.731	57.4145	54.9627	48.8248	49.3157	51.8424	-0.0561532	0.190188	0.821304		-0.136305	0.859181	0.319766		-0.042883	0.164714	0.796185		-0.108906	0.576421	0.662797
sp|Q96S94|CCNL2_HUMAN	CCNL2	Cyclin-L2 OS=Homo sapiens OX=9606 GN=CCNL2 PE=1 SV=1	2475	2	34.7671	41.9529	43.3042	43.0405	30.0787	37.0228	36.7538	35.8991	36.9726	35.4581	43.7609	45.4919	39.0354	27.2928	40.1504	40.0605	0.0716713	0.294919	0.722107		-0.202969	0.405769	0.606901		-0.236657	0.897443	0.197802		-0.169501	0.969412	0.46378
sp|Q8N1B3|CCNQ_HUMAN	CCNQ	Cyclin-Q OS=Homo sapiens OX=9606 GN=CCNQ PE=1 SV=2	6787	1	24.3931	22.6695	25.2183	25.2226	24.0777	24.6061	23.4563	14.8002	22.0345	19.208	31.2175	27.716	30.0881	25.4592	28.109	26.8636	0.283319	1.95182	0.0844029		0.137521	1.22323	0.20253		-0.0185404	0.170637	0.790267		-0.401741	0.872669	0.509531
sp|O60563|CCNT1_HUMAN	CCNT1	Cyclin-T1 OS=Homo sapiens OX=9606 GN=CCNT1 PE=1 SV=1	4655	5	197.403	191.768	186.614	200.987	197.172	182.762	200.568	177.046	192.291	195.97	183.231	179.851	172.663	181.793	176.282	175.513	-0.120775	1.70693	0.10975		-0.12633	2.14046	0.0756103		-0.00574551	0.0406302	0.952156		-0.0442335	0.350708	0.802939
sp|O60583|CCNT2_HUMAN	CCNT2	Cyclin-T2 OS=Homo sapiens OX=9606 GN=CCNT2 PE=1 SV=2	4655	3	61.5363	67.0303	71.1318	76.8271	69.6527	76.0364	71.6215	68.0411	65.0535	59.1429	74.1941	81.7058	77.572	79.4977	76.9794	69.6379	0.174503	1.08729	0.249926		0.127162	0.674171	0.420053		0.0711638	0.393596	0.537639		-0.107178	0.540098	0.682893
sp|Q8ND76|CCNY_HUMAN	CCNY	Cyclin-Y OS=Homo sapiens OX=9606 GN=CCNY PE=1 SV=2	4710	3	89.9829	74.7974	77.0033	86.241	99.582	92.7249	84.403	87.2193	92.9031	76.3799	97.1476	105.391	84.803	86.1844	79.2917	87.7535	0.222508	0.920247	0.303281		0.0445344	0.226167	0.762599		0.170562	0.87168	0.207678		0.0597057	0.222461	0.881209
sp|Q8N7R7|CCYL1_HUMAN	CCNYL1	Cyclin-Y-like protein 1 OS=Homo sapiens OX=9606 GN=CCNYL1 PE=1 SV=2	4710	3	364.107	399.671	383.157	362.542	379.55	409.352	411.76	345.254	358.229	384.702	437.978	433.03	405.645	417.469	394.662	398.891	0.1737	1.77677	0.101354		0.0979456	1.18337	0.210917		0.084997	0.79803	0.23796		-0.0573876	0.432715	0.745527
sp|O43303|CP110_HUMAN	CCP110	Centriolar coiled-coil protein of 110 kDa OS=Homo sapiens OX=9606 GN=CCP110 PE=1 SV=3	1687	3	215.163	214.981	231.004	235.103	210.259	225.057	230.952	200.326	200.304	212.352	201.364	211.882	192.304	217.306	215.788	216.555	-0.150561	1.3807	0.162986		-0.0480204	0.600506	0.461755		-0.0126955	0.0859345	0.898087		-0.13238	1.52732	0.263075
sp|Q9ULG6-5|CCPG1_HUMAN	CCPG1	Isoform 5 of Cell cycle progression protein 1 OS=Homo sapiens OX=9606 GN=CCPG1	4162	4	208.963	237.94	202.565	219.911	70.8672	73.4481	83.6866	320.721	325.537	294.696	189.002	214.731	224.881	221.741	225.401	242.886	-0.0539229	0.232345	0.780376		0.0832621	0.592506	0.467024		-1.51694	4.01446	0.00114286	+	0.530502	3.25634	0.018	+
sp|O14618|CCS_HUMAN	CCS	Copper chaperone for superoxide dismutase OS=Homo sapiens OX=9606 GN=CCS PE=1 SV=1	6062	4	238.246	222.267	248.542	235.384	258.688	211.947	230.061	217.994	239.693	209.724	239.948	239.58	278.391	244.704	266.527	228.837	0.0951344	0.495683	0.554675		0.061567	0.34423	0.658892		-0.0193352	0.073108	0.913526		-0.0869902	0.56521	0.668173
sp|Q4G0I0|CSMT1_HUMAN	CCSMST1	Protein CCSMST1 OS=Homo sapiens OX=9606 GN=CCSMST1 PE=2 SV=1	1902	1	69.6118	68.6512	78.0497	65.0737	54.0384	62.8732	73.1243	58.3026	79.5563	64.5724	80.2852	82.979	85.0223	64.6743	78.9665	73.3175	0.237303	1.77726	0.101361		0.0382592	0.139838	0.85147		-0.159011	0.471838	0.456807		-0.0691198	0.176989	0.908346
sp|P78371|TCPB_HUMAN	CCT2	T-complex protein 1 subunit beta OS=Homo sapiens OX=9606 GN=CCT2 PE=1 SV=4	307	15	3074.93	2979.01	2913.62	2995.7	3089.51	2907.23	2895.43	2957.62	2706.81	2922.35	2731.22	2550.1	2705.76	2920.5	2807.2	2720.97	-0.168229	1.79021	0.099775		-0.087117	1.11571	0.227875		-0.0133395	0.141521	0.823954		-0.06422	0.61119	0.64492
sp|P49368|TCPG_HUMAN	CCT3	T-complex protein 1 subunit gamma OS=Homo sapiens OX=9606 GN=CCT3 PE=1 SV=4	758	15	2222.9	2301.37	2299.69	2270.63	2288.99	2151.85	2292.95	2191.22	2163.85	2183.42	2202.38	2188.38	2139.38	2245.17	2186.21	2135.19	-0.0628272	1.76562	0.102654		-0.0549933	1.00338	0.26604		-0.0190359	0.219694	0.728699		-0.0608922	2.07554	0.125031
sp|P50991|TCPD_HUMAN	CCT4	T-complex protein 1 subunit delta OS=Homo sapiens OX=9606 GN=CCT4 PE=1 SV=4	2332	14	2558.02	2593.53	2387.12	2498.76	2532.82	2473.06	2442.31	2533.6	2294.38	2378.89	2207.22	2092.15	2179.27	2355.56	2283.84	2207	-0.216253	2.77541	0.0323951	+	-0.136734	1.77686	0.110524		-0.0148443	0.188479	0.767218		-0.0634131	0.557748	0.671878
sp|P48643|TCPE_HUMAN	CCT5	T-complex protein 1 subunit epsilon OS=Homo sapiens OX=9606 GN=CCT5 PE=1 SV=1	2332	14	1568.86	1508.54	1597.27	1622.39	1497.85	1468.14	1484.07	1624.11	1532.94	1639.23	1430.01	1331.09	1407.09	1420.28	1410.16	1456.79	-0.180367	1.99974	0.0811774		-0.139207	2.39491	0.0540215		-0.0853357	1.57717	0.0577516		0.0221734	0.230208	0.877202
sp|P40227|TCPZ_HUMAN	CCT6A	T-complex protein 1 subunit zeta OS=Homo sapiens OX=9606 GN=CCT6A PE=1 SV=3	2467	9	1924.17	2033.67	1940.61	1904.65	1835.87	1847.35	1905.5	1853.09	1710.35	1773.71	1889.91	1618.78	1768.3	1951.44	1783.36	1719.03	-0.151727	0.876407	0.322783		-0.103345	0.725742	0.388665		-0.0662259	1.253	0.101498		-0.133258	1.46926	0.282799
sp|Q99832|TCPH_HUMAN	CCT7	T-complex protein 1 subunit eta OS=Homo sapiens OX=9606 GN=CCT7 PE=1 SV=2	2034	8	2009.69	1916.43	1861.69	1864.52	1910.86	1768.71	1815.96	1854.78	1765.16	1759.48	1732.01	1693.24	1690.64	1682.86	1756.72	1676.97	-0.165268	2.3892	0.0532714		-0.165317	2.35622	0.0564898		-0.0626522	0.69014	0.292534		-0.0931374	1.31264	0.325308
sp|P50990|TCPQ_HUMAN	CCT8	T-complex protein 1 subunit theta OS=Homo sapiens OX=9606 GN=CCT8 PE=1 SV=4	1868	17	2620.63	2527.25	2493.78	2417.9	2571.67	2399.63	2416.29	2461.33	2387.6	2377.17	2312.08	2243.19	2265.56	2378.27	2431.14	2297.25	-0.145022	2.34308	0.0544238		-0.086075	1.27242	0.191473		-0.0304557	0.312752	0.621011		-0.0618113	1.06198	0.429995
sp|P86791|CCZ1_HUMAN	CCZ1	Vacuolar fusion protein CCZ1 homolog OS=Homo sapiens OX=9606 GN=CCZ1 PE=1 SV=1	1246	3	141.796	148.084	139.639	133.183	141.908	142.631	146.817	139	139.836	138.56	158.792	139.455	138.04	144.339	134.526	150.217	0.0460053	0.243705	0.769409		0.023462	0.155324	0.833468		0.032418	0.392508	0.539141		-0.0148922	0.173492	0.909162
sp|Q6YHK3|CD109_HUMAN	CD109	CD109 antigen OS=Homo sapiens OX=9606 GN=CD109 PE=1 SV=2	1294	9	1257.06	1192.35	1160.42	1166.13	1319.83	1254.33	1292.94	1151.16	1198.95	1168.45	1141.21	1136.76	1191.57	1113.69	1248.03	1218.53	-0.0456074	0.619495	0.462961		-0.00167856	0.00960428	0.988689		0.110915	1.65234	0.0505069		-0.0252407	0.336612	0.811754
sp|P08571|CD14_HUMAN	CD14	Monocyte differentiation antigen CD14 OS=Homo sapiens OX=9606 GN=CD14 PE=1 SV=2	5878	1	52.0297	59.2979	59.0445	62.6019	40.5698	42.871	45.3032	49.9769	52.0063	54.9046	68.1235	70.88	81.7646	71.5929	57.0349	71.7792	0.336171	1.55229	0.130126		0.192911	0.667588	0.423641		-0.438824	2.74126	0.00895238	+	-0.153206	1.10863	0.409166
sp|P48509|CD151_HUMAN	CD151	CD151 antigen OS=Homo sapiens OX=9606 GN=CD151 PE=1 SV=3	4634	5	431.611	418.103	360.162	378.895	482.628	470.981	506.798	469.527	499.523	512.193	432.242	436.91	675.791	431.444	405.065	382.113	0.345909	0.619238	0.463147		0.0344335	0.166567	0.820232		0.296655	1.98947	0.0291543	+	0.316807	2.10448	0.120671
sp|Q9Y5K6|CD2AP_HUMAN	CD2AP	CD2-associated protein OS=Homo sapiens OX=9606 GN=CD2AP PE=1 SV=1	2140	12	1778.93	1710.1	1725.35	1763.37	1891.72	1731.79	1789.7	1730.76	1676.52	1742.07	1763.81	1668.74	1658.84	1773.58	1692.94	1703.12	-0.0400356	0.534533	0.522069		-0.0177869	0.284299	0.70995		0.0479814	0.486828	0.441704		-0.0233527	0.469202	0.723566
sp|O95400|CD2B2_HUMAN	CD2BP2	CD2 antigen cytoplasmic tail-binding protein 2 OS=Homo sapiens OX=9606 GN=CD2BP2 PE=1 SV=1	5121	6	174.907	184.142	184.029	162.027	170.605	165.445	178.624	184.958	183.227	187.306	194.238	180.452	179.293	174.138	170.996	181.173	0.0680264	0.541453	0.517374		-0.00537301	0.0366794	0.95994		-0.0379144	0.288294	0.645697		0.0728487	0.715424	0.584466
sp|Q9NPF0|CD320_HUMAN	CD320	CD320 antigen OS=Homo sapiens OX=9606 GN=CD320 PE=1 SV=1	4103	2	112.253	123.503	114.382	126.014	106.405	102.985	102.891	178.458	196.619	164.489	116.787	105.221	136.463	110.524	119.099	113.539	-0.00108198	0.00293853	0.997246		-0.0564497	0.489329	0.538879		-0.19198	1.88704	0.0341995	+	0.593307	2.31147	0.0939738
sp|O15446-2|RPA34_HUMAN	CD3EAP	Isoform 2 of DNA-directed RNA polymerase I subunit RPA34 OS=Homo sapiens OX=9606 GN=CD3EAP	6135	5	382.286	385.803	391.656	406.16	361.135	389.352	402.161	362.159	376.58	388.667	386.801	363.976	373.298	345.7	364.749	399.3	-0.0632838	0.930582	0.299051		-0.0839055	0.524432	0.512183		-0.0280758	0.21006	0.740239		-0.0591666	0.756167	0.562558
sp|P25942|TNR5_HUMAN	CD40	Tumor necrosis factor receptor superfamily member 5 OS=Homo sapiens OX=9606 GN=CD40 PE=1 SV=1	3871	4	228.118	227.674	196.082	172.415	258.525	250.11	256.17	195.608	219.672	232.821	218.938	227.481	298.246	238.683	238.705	219.652	0.264067	0.697797	0.412405		0.181658	0.796164	0.351322		0.316466	1.34071	0.0862928		0.0739895	0.243528	0.867643
sp|P16070|CD44_HUMAN	CD44	CD44 antigen OS=Homo sapiens OX=9606 GN=CD44 PE=1 SV=3	2506	7	556.87	561.071	577.995	569.84	528.227	550.915	560.253	637.661	610.699	643.22	556.34	560.047	612.82	577.358	591.249	593.602	0.0238749	0.184845	0.824678		0.0524581	1.50409	0.146736		-0.0520957	0.789686	0.24164		0.154403	2.04393	0.12916
sp|P15529-3|MCP_HUMAN	CD46	Isoform D of Membrane cofactor protein OS=Homo sapiens OX=9606 GN=CD46	858	1	88.5156	98.5007	88.7325	75.0052	65.5	69.9046	60.8789	92.6326	96.8425	98.7446	71.5146	84.7845	99.3292	95.529	92.1037	95.6935	-0.0475443	0.106458	0.898654		0.113577	0.588012	0.468933		-0.418022	2.05301	0.0268093	+	0.137991	0.722223	0.580093
sp|P15529|MCP_HUMAN	CD46	Membrane cofactor protein OS=Homo sapiens OX=9606 GN=CD46 PE=1 SV=3	858	3	472.923	511.303	472.713	466.686	529.027	483.395	507.558	654.566	642.496	692.606	487.468	516.32	542.69	496.94	436.227	489.975	0.099767	0.843329	0.335546		-0.0211805	0.112579	0.880645		0.0752387	0.722113	0.273315		0.463954	3.66702	0.00706667	+
sp|Q08722|CD47_HUMAN	CD47	Leukocyte surface antigen CD47 OS=Homo sapiens OX=9606 GN=CD47 PE=1 SV=1	5622	2	148.621	140.412	126.058	128.502	165.271	154.907	161.74	146.612	152.705	142.999	132.83	126.558	200.291	141.608	152.765	129.878	0.14453	0.246454	0.767145		0.0574956	0.263663	0.728064		0.244008	1.8213	0.0373728	+	0.120289	0.919836	0.489657
tr|B1AP13|B1AP13_HUMAN	CD55	Complement decay-accelerating factor OS=Homo sapiens OX=9606 GN=CD55 PE=1 SV=1	6846	4	197.599	187.246	190.095	174.106	217.676	204.188	205.045	182.118	192.424	178.155	189.463	198.289	221.054	191.595	206.414	191.475	0.114424	0.653717	0.438566		0.0700363	0.618589	0.449964		0.159124	1.65915	0.0499874	+	-0.0227842	0.173318	0.908922
sp|P13987-2|CD59_HUMAN	CD59	Isoform 2 of CD59 glycoprotein OS=Homo sapiens OX=9606 GN=CD59	5927	1	34.1989	42.2233	33.02	34.1342	62.6498	59.2722	49.8126	36.6085	34.4063	46.8636	52.5277	66.609	71.1698	41.8954	40.1838	32.7978	0.816717	2.0249	0.0798702		0.0923648	0.272172	0.721438		0.673755	2.2805	0.017819	+	0.12447	0.315455	0.826818
sp|P08962|CD63_HUMAN	CD63	CD63 antigen OS=Homo sapiens OX=9606 GN=CD63 PE=1 SV=2	7716	3	751.598	782.205	661.099	625.603	724.261	783.032	720.834	823.037	1034.1	811.233	640.092	605.78	844.855	671.757	632.024	594.528	-0.0266464	0.0539968	0.950747		-0.152018	0.798281	0.350119		0.079844	0.399921	0.530371		0.331887	1.11332	0.406295
sp|P04233-2|HG2A_HUMAN	CD74	Isoform 2 of HLA class II histocompatibility antigen gamma chain OS=Homo sapiens OX=9606 GN=CD74	6084	5	728.592	780.846	743.803	742.289	620.511	661.87	650.668	807.367	832.295	835.536	579.098	680.984	673.577	650.056	688.137	684.381	-0.219839	1.04289	0.261916		-0.151576	2.03085	0.0855859		-0.216954	2.4934	0.0128563	+	0.140078	2.48022	0.0752649
sp|P27701|CD82_HUMAN	CD82	CD82 antigen OS=Homo sapiens OX=9606 GN=CD82 PE=1 SV=1	6598	3	215.346	257.691	229.416	223.592	218.365	228.448	258.182	233.876	233.255	200.729	254.345	259.111	258.54	246.985	255.091	251.525	0.155798	1.17478	0.216865		0.120929	0.932953	0.289765		0.0212153	0.0823487	0.902767		-0.0568163	0.245054	0.867151
tr|G8JLH6|G8JLH6_HUMAN	CD9	Tetraspanin OS=Homo sapiens OX=9606 GN=CD9 PE=1 SV=2	5193	3	267.099	260.723	223.756	266.728	414.516	335.049	386.957	305.341	259.903	353.538	260.913	246.363	327.904	269.583	212.099	243.148	0.121579	0.346414	0.677383		-0.0785296	0.26297	0.72925		0.571694	2.1138	0.023772	+	0.259123	0.77389	0.555635
sp|P48960|CD97_HUMAN	CD97	CD97 antigen OS=Homo sapiens OX=9606 GN=CD97 PE=1 SV=4	3984	6	389.279	403.003	428.749	428.716	364.708	406.36	397.016	415.885	426.103	432.512	451.227	443.447	413.862	400.946	400.922	420.469	0.0809839	0.741574	0.388785		-0.0166947	0.152315	0.837061		-0.0833719	0.639778	0.322385		0.0437713	0.50352	0.706591
sp|P32320|CDD_HUMAN	CDA	Cytidine deaminase OS=Homo sapiens OX=9606 GN=CDA PE=1 SV=2	1949	4	115.667	130.986	114.161	120.685	134.409	126.053	126.851	122.819	115.081	126.578	142.458	128.562	125.702	132.278	114.514	115.132	0.135576	0.899536	0.312272		0.00203543	0.00816517	0.989242		0.102505	0.935066	0.184246		0.0143102	0.0850662	0.957529
sp|Q8IWY9|CDAN1_HUMAN	CDAN1	Codanin-1 OS=Homo sapiens OX=9606 GN=CDAN1 PE=1 SV=4	641	1	20.5189	16.941	14.4275	14.8629	12.8055	15.8366	16.2226	17.6498	16.0252	15.3187	18.371	17.8108	17.1559	15.9491	14.8317	14.769	0.105127	0.360326	0.667613		-0.122925	0.426928	0.588241		-0.151825	0.416783	0.514241		-0.0194063	0.0514177	0.975046
sp|O75794|CD123_HUMAN	CDC123	Cell division cycle protein 123 homolog OS=Homo sapiens OX=9606 GN=CDC123 PE=1 SV=1	3902	6	599.9	589.376	584.882	612.334	425.594	376.304	412.493	570.973	574.086	548.253	596.198	552.344	522.221	531.344	539.801	525.153	-0.101254	0.69168	0.41514		-0.16499	3.50562	0.0152453	+	-0.561345	2.23811	0.0192514	+	-0.0800833	1.42781	0.294661
sp|Q13042|CDC16_HUMAN	CDC16	Cell division cycle protein 16 homolog OS=Homo sapiens OX=9606 GN=CDC16 PE=1 SV=2	2009	7	1360.64	1356.75	1326.14	1393.63	1326.3	1238.48	1310.56	1245.28	1313.71	1275.28	1362.16	1374.2	1246.68	1298.27	1348.7	1302.47	-0.0351038	0.282086	0.73265		-0.0461602	0.96464	0.279598		-0.0739098	0.92439	0.187648		-0.0889865	1.47591	0.281039
sp|Q12834|CDC20_HUMAN	CDC20	Cell division cycle protein 20 homolog OS=Homo sapiens OX=9606 GN=CDC20 PE=1 SV=2	3617	3	480.016	587.528	484.28	407.477	284.965	289.248	367.803	369.089	379.578	380.191	494.644	509.763	455.022	622.056	392.982	388.189	0.000642806	0.00177201	0.998131		-0.0906528	0.130757	0.860529		-0.6394	1.89752	0.0340922	+	-0.368379	1.38808	0.30593
sp|Q9UJX2|CDC23_HUMAN	CDC23	Cell division cycle protein 23 homolog OS=Homo sapiens OX=9606 GN=CDC23 PE=1 SV=3	2505	8	381.495	404.522	391.84	383.851	405.485	402.987	340.59	393.252	417.689	365.967	383.714	401.576	356.511	367.724	405.526	397.505	-0.038123	0.271469	0.743644		-0.00154308	0.0105219	0.987242		-0.0318673	0.13108	0.838709		0.00519226	0.0288426	0.985779
sp|P30305-4|MPIP2_HUMAN	CDC25B	Isoform 4 of M-phase inducer phosphatase 2 OS=Homo sapiens OX=9606 GN=CDC25B	8073	1	70.8981	77.6689	85.2611	81.9431	37.0283	30.0883	47.802	64.623	78.3805	75.1625	85.1377	76.3884	67.9258	81.6711	71.8701	66.3856	-0.0483614	0.163002	0.845001		-0.108703	0.441853	0.577713		-1.06576	1.62792	0.0524945		-0.11988	0.508177	0.703063
sp|P30307|MPIP3_HUMAN	CDC25C	M-phase inducer phosphatase 3 OS=Homo sapiens OX=9606 GN=CDC25C PE=1 SV=2	4919	3	117.934	131.537	125.264	129.135	75.8206	59.1908	74.1672	119.135	131.871	117.444	124.204	127.719	106.161	119.118	136.332	127.887	-0.0811789	0.356753	0.669442		0.0196367	0.106254	0.886108		-0.860838	1.9377	0.0325085	+	-0.0372592	0.230234	0.877329
tr|G5EA36|G5EA36_HUMAN	CDC27	Cell division cycle 27, isoform CRA_c OS=Homo sapiens OX=9606 GN=CDC27 PE=1 SV=1	33	8	657.752	692.359	661.998	666.505	629.135	633.081	614.064	692.58	696.772	679.097	663.85	697.461	668.795	686.925	725.883	724.28	0.0150514	0.210689	0.804638		0.0890191	1.28895	0.187879		-0.0984104	2.23793	0.019289	+	0.0423017	1.04576	0.436313
sp|P49427|UB2R1_HUMAN	CDC34	Ubiquitin-conjugating enzyme E2 R1 OS=Homo sapiens OX=9606 GN=CDC34 PE=1 SV=2	2385	2	13.6691	19.2276	18.1855	21.3241	15.3504	14.923	13.3362	13.307	18.2632	12.6066	18.5012	17.8889	18.0844	13.3685	18.3931	14.1637	0.0231339	0.056815	0.94792		-0.237276	0.544142	0.49824		-0.300289	0.937676	0.183328		-0.298908	0.6311	0.630868
sp|Q16543|CDC37_HUMAN	CDC37	Hsp90 co-chaperone Cdc37 OS=Homo sapiens OX=9606 GN=CDC37 PE=1 SV=1	3105	9	1660.82	1608.75	1800.29	1766.66	1531.39	1664.28	1561.61	1619.38	1622.49	1676.44	1706.34	1720.24	1544.33	1522.62	1538.45	1555.32	-0.0449404	0.28987	0.725938		-0.150024	1.59058	0.134202		-0.107514	1.01317	0.159594		-0.0587551	0.64369	0.625332
sp|Q7L3B6|CD37L_HUMAN	CDC37L1	Hsp90 co-chaperone Cdc37-like 1 OS=Homo sapiens OX=9606 GN=CDC37L1 PE=1 SV=1	1106	3	94.5701	91.5381	104.172	94.9485	80.3937	89.7587	85.6432	98.7005	98.9628	102.111	100.639	91.1787	92.73	78.1662	99.2307	99.9296	-0.0216658	0.135496	0.870091		-0.0665348	0.198067	0.789076		-0.175458	1.40066	0.0786027		0.0547207	0.560424	0.669982
sp|O60508|PRP17_HUMAN	CDC40	Pre-mRNA-processing factor 17 OS=Homo sapiens OX=9606 GN=CDC40 PE=1 SV=1	4009	6	146.89	165.818	173.122	144.261	150.727	161.035	163.893	141.805	150.105	149.689	167.208	161.491	141.316	155.26	143.012	173.112	-0.00719436	0.0246626	0.974201		-0.00369248	0.0119097	0.985651		0.0128203	0.060163	0.927394		-0.093919	0.598949	0.649019
sp|P60953|CDC42_HUMAN	CDC42	Cell division control protein 42 homolog OS=Homo sapiens OX=9606 GN=CDC42 PE=1 SV=2	3026	4	317.693	325.153	305.205	311.457	331.85	322.906	294.784	314.244	285.994	335.202	297.287	285.063	329.217	341.59	266.699	294.037	-0.0536656	0.317748	0.703587		-0.0732323	0.255135	0.735747		0.00604369	0.0358295	0.958587		-0.0167573	0.0817185	0.959691
sp|Q5VT25-3|MRCKA_HUMAN	CDC42BPA	Isoform 3 of Serine/threonine-protein kinase MRCK alpha OS=Homo sapiens OX=9606 GN=CDC42BPA	1333	1	112.74	106.803	98.7256	102.571	115.441	107.656	103.477	108.942	103.971	115.979	99.8194	99.0486	104.799	107.431	118.653	113.411	-0.0544425	0.503736	0.54699		0.105722	0.878967	0.313157		0.0494472	0.334376	0.597964		0.059684	0.420608	0.753227
sp|Q5VT25-2|MRCKA_HUMAN	CDC42BPA	Isoform 2 of Serine/threonine-protein kinase MRCK alpha OS=Homo sapiens OX=9606 GN=CDC42BPA	1333	13	867.696	821.714	877.255	858.669	919.281	867.283	925.801	913.835	893.727	871.297	916.322	918.971	914.847	880.918	942.313	949.811	0.0987371	1.76927	0.102135		0.109887	1.20535	0.206981		0.0781725	0.994326	0.165655		0.0605797	1.04656	0.436375
sp|Q9Y5S2|MRCKB_HUMAN	CDC42BPB	Serine/threonine-protein kinase MRCK beta OS=Homo sapiens OX=9606 GN=CDC42BPB PE=1 SV=2	1333	8	553.351	527.422	523.156	494.275	627.289	570.97	573.03	510.628	517.743	504.164	593.119	483.842	541.775	526.814	549.136	515.103	0.0369235	0.144731	0.863089		0.0165125	0.144785	0.84641		0.170458	1.43351	0.0736909		-0.0371263	0.448197	0.734836
sp|Q6DT37|MRCKG_HUMAN	CDC42BPG	Serine/threonine-protein kinase MRCK gamma OS=Homo sapiens OX=9606 GN=CDC42BPG PE=1 SV=2	1333	4	117.535	98.6197	103.998	108.161	84.1878	67.5857	76.6502	110.411	110.441	93.583	108.669	113.775	98.3404	123.895	118.995	115.075	-0.00170018	0.00686033	0.993638		0.158504	1.26606	0.193423		-0.494749	1.82987	0.0372162	+	-0.0322008	0.122083	0.939756
sp|O14613|BORG1_HUMAN	CDC42EP2	Cdc42 effector protein 2 OS=Homo sapiens OX=9606 GN=CDC42EP2 PE=1 SV=1	4805	1	18.675	20.838	15.9435	19.68	33.8475	34.8817	28.5033	24.004	19.4781	16.8986	21.2128	17.349	25.0056	27.1522	22.2347	20.9364	0.16484	0.388307	0.641996		0.317459	1.05849	0.248205		0.788377	2.73031	0.00922556	+	0.0915046	0.205633	0.892419
sp|Q9UKI2|BORG2_HUMAN	CDC42EP3	Cdc42 effector protein 3 OS=Homo sapiens OX=9606 GN=CDC42EP3 PE=1 SV=1	1892	3	66.1419	60.5746	70.4031	68.9271	66.6784	61.0563	68.1537	60.5211	66.0538	67.0647	70.6962	52.3529	62.6809	65.2456	62.3324	61.9976	-0.111938	0.322556	0.700147		-0.0718885	0.609959	0.455656		-0.025863	0.142177	0.823145		-0.0423692	0.257119	0.862377
sp|Q9H3Q1|BORG4_HUMAN	CDC42EP4	Cdc42 effector protein 4 OS=Homo sapiens OX=9606 GN=CDC42EP4 PE=1 SV=1	1624	4	363.86	363.834	357.911	349.149	413.628	401.299	403.801	351.627	318.718	337.995	344.031	331.35	367.15	355.579	361.896	359.175	-0.0467722	0.40338	0.629691		0.000950532	0.020059	0.976029		0.179692	3.56225	0.00225116	+	-0.0947508	0.864295	0.515222
sp|Q9NRR3|C42S2_HUMAN	CDC42SE2	CDC42 small effector protein 2 OS=Homo sapiens OX=9606 GN=CDC42SE2 PE=1 SV=1	6677	3	89.3987	91.0657	86.1923	92.9972	89.093	96.5919	95.2211	99.9059	101.129	99.2682	114.386	103.816	101.92	89.3417	101.6	99.5296	0.245743	1.59064	0.123854		0.105119	0.698247	0.404804		0.0581882	0.597362	0.350495		0.155365	2.36537	0.0861296
sp|Q99459|CDC5L_HUMAN	CDC5L	Cell division cycle 5-like protein OS=Homo sapiens OX=9606 GN=CDC5L PE=1 SV=2	4824	7	745.085	715.602	715.411	731.302	719.043	739.016	736.839	737.66	736.217	708.982	686.108	733.703	704.276	681.486	695.249	727.459	-0.0381929	0.505966	0.54561		-0.0517573	0.709355	0.397237		0.00956044	0.197967	0.756191		0.00149484	0.0213687	0.990693
sp|O00311|CDC7_HUMAN	CDC7	Cell division cycle 7-related protein kinase OS=Homo sapiens OX=9606 GN=CDC7 PE=1 SV=1	3096	2	113.315	109.089	115.384	119.09	90.6787	85.5655	100.958	106.185	102.36	102.376	112.824	111.701	113.302	121.053	111.117	122.138	-0.0197885	0.289444	0.725892		0.0476585	0.387234	0.623662		-0.308521	1.46374	0.069236		-0.139715	2.11914	0.117267
sp|Q6P1J9|CDC73_HUMAN	CDC73	Parafibromin OS=Homo sapiens OX=9606 GN=CDC73 PE=1 SV=1	119	7	1330.61	1373.89	1336.79	1362.2	1281.09	1313.39	1303.01	1336.17	1253.41	1353.95	1288.48	1373.12	1252.15	1325.34	1260.53	1374.11	-0.0512546	0.493304	0.555778		-0.0341362	0.348968	0.65484		-0.0562613	1.82736	0.0373623	+	-0.0400542	0.437401	0.742279
sp|Q69YH5|CDCA2_HUMAN	CDCA2	Cell division cycle-associated protein 2 OS=Homo sapiens OX=9606 GN=CDCA2 PE=1 SV=2	6061	4	166.65	161.788	188.354	166.454	123.327	114.687	129.824	170.242	155.671	158.886	178.015	191.178	153.155	164.787	165.856	170.181	0.0240952	0.0784264	0.925865		-0.0306728	0.233887	0.755564		-0.477625	2.83704	0.00739293	+	-0.0785143	0.576893	0.662787
sp|Q99618|CDCA3_HUMAN	CDCA3	Cell division cycle-associated protein 3 OS=Homo sapiens OX=9606 GN=CDCA3 PE=1 SV=1	7845	5	253.588	217.689	242.296	211.306	215.037	222.698	211.059	239.305	228.912	219.162	247.932	228.348	239.842	252.454	290.551	274.539	0.0492062	0.280647	0.733418		0.238726	1.40143	0.164404		-0.0927749	0.621162	0.333958		-0.0100011	0.0477547	0.977358
sp|Q9BXL8|CDCA4_HUMAN	CDCA4	Cell division cycle-associated protein 4 OS=Homo sapiens OX=9606 GN=CDCA4 PE=1 SV=1	6987	1	15.0904	15.2522	15.319	13.4483	12.4761	11.6014	11.3066	13.2068	10.1881	12.6635	14.3002	11.8789	11.7819	14.74	6.9745	11.4112	-0.227679	0.950801	0.291208		-0.484566	0.577646	0.47645		-0.324472	2.44954	0.0133619	+	-0.305068	0.98115	0.460346
tr|B5MBX0|B5MBX0_HUMAN	CDCA5	Sororin OS=Homo sapiens OX=9606 GN=CDCA5 PE=1 SV=1	5928	2	109.346	104.083	103.188	115.319	129.288	105.808	122.448	101.148	100.12	86.3489	103.117	115.568	95.4454	104.763	108.385	116.229	-0.0474612	0.200727	0.812526		0.0240364	0.157379	0.83091		0.138684	0.61173	0.340513		-0.173903	0.901643	0.4981
sp|Q9BWT1-2|CDCA7_HUMAN	CDCA7	Isoform 2 of Cell division cycle-associated protein 7 OS=Homo sapiens OX=9606 GN=CDCA7	3732	3	67.5919	53.2766	59.367	67.8091	48.2222	38.7171	43.8197	71.4896	59.5842	61.5997	67.1755	60.1585	56.4638	53.8838	53.9382	54.8487	-0.0140297	0.0436104	0.956796		-0.186501	0.953748	0.283193		-0.50729	1.94725	0.0317459	+	0.0531558	0.175759	0.908276
[truncated: 7,013 more rows]

## Sheet: Fig5_Proteome
Protein Id	Gene Symbol	Description	Number of peptides	KPC_1_sn_sum	KPC_2_sn_sum	KPC_3_sn_sum	KPC_4_sn_sum	KPC_5_sn_sum	KPCN_1_sn_sum	KPCN_2_sn_sum	KPCN_3_sn_sum	KPCN_4_sn_sum	KPCN_5_sn_sum	Log2FC(KPCN/KPC)	negLog10(p-val KPCN/KPC)	qval(KPCN/KPC)	qval (KPCN/KPC)	KPCN/KPC Welch's T-test Significant: S=0, FDR=10%
[truncated: 9,259 more rows]
