# Supplementary material for: NCOA4-Mediated Ferritinophagy Is a Pancreatic Cancer Dependency via Maintenance of Iron Bioavailability for Iron–Sulfur Cluster Proteins
Source: Oxford University Press journal article supplement (doi:10.1158/2159-8290.cd-22-0043), 2022-06-30
Supplement: cd-22-0043_supplementary_table_2_suppst2.xlsx [file cd-22-0043_supplementary_table_2_suppst2.xlsx]

## Sheet: Supp_Table_Contents
Table of contents
REACTOME_up_in_sgNCOA4-1
REACTOME_up_in_sgControl
GOMF_up_in_sgNCOA4-1
GOMF_up_in_sgControl
KEGG_up_in_sgNCOA4-1
KEGG_up_in_sgControl
REACTOME_up_in_KPCN
REACTOME_up_in_KPC

## Sheet: REACTOME_up_in_sgNCOA4-1
NAME	GS<br> follow link to MSigDB	GS DETAILS	SIZE	ES	NES	NOM p-val	FDR q-val	FWER p-val	RANK AT MAX	LEADING EDGE
REACTOME_COLLAGEN_FORMATION	REACTOME_COLLAGEN_FORMATION	Details ...	32	0.666222	1.99349	0	0.0237732	0.03	530	tags=38%, list=7%, signal=40%
REACTOME_CELL_JUNCTION_ORGANIZATION	REACTOME_CELL_JUNCTION_ORGANIZATION	Details ...	39	0.631186	1.99013	0	0.0122587	0.031	765	tags=33%, list=10%, signal=37%
REACTOME_GLYCEROPHOSPHOLIPID_BIOSYNTHESIS	REACTOME_GLYCEROPHOSPHOLIPID_BIOSYNTHESIS	Details ...	74	0.557219	1.97155	0	0.0106909	0.04	2134	tags=58%, list=27%, signal=79%
REACTOME_COLLAGEN_BIOSYNTHESIS_AND_MODIFYING_ENZYMES	REACTOME_COLLAGEN_BIOSYNTHESIS_AND_MODIFYING_ENZYMES	Details ...	19	0.716609	1.95898	0	0.00915413	0.045	1219	tags=42%, list=15%, signal=50%
REACTOME_CA2_PATHWAY	REACTOME_CA2_PATHWAY	Details ...	31	0.637772	1.95124	0	0.0080782	0.049	1312	tags=45%, list=16%, signal=54%
REACTOME_CELL_CELL_COMMUNICATION	REACTOME_CELL_CELL_COMMUNICATION	Details ...	61	0.567698	1.94612	0	0.00762741	0.055	1726	tags=41%, list=22%, signal=52%
REACTOME_SPHINGOLIPID_METABOLISM	REACTOME_SPHINGOLIPID_METABOLISM	Details ...	54	0.565427	1.9025	0	0.0140429	0.118	1154	tags=44%, list=14%, signal=52%
REACTOME_ASSEMBLY_OF_COLLAGEN_FIBRILS_AND_OTHER_MULTIMERIC_STRUCTURES	REACTOME_ASSEMBLY_OF_COLLAGEN_FIBRILS_AND_OTHER_MULTIMERIC_STRUCTURES	Details ...	18	0.697754	1.90171	0	0.0124741	0.12	530	tags=50%, list=7%, signal=53%
REACTOME_PHOSPHOLIPID_METABOLISM	REACTOME_PHOSPHOLIPID_METABOLISM	Details ...	132	0.492938	1.89859	0	0.0115173	0.124	2138	tags=50%, list=27%, signal=67%
REACTOME_G_ALPHA_Z_SIGNALLING_EVENTS	REACTOME_G_ALPHA_Z_SIGNALLING_EVENTS	Details ...	21	0.669272	1.87338	0.00154799	0.0161668	0.19	1500	tags=67%, list=19%, signal=82%
REACTOME_ANTI_INFLAMMATORY_RESPONSE_FAVOURING_LEISHMANIA_PARASITE_INFECTION	REACTOME_ANTI_INFLAMMATORY_RESPONSE_FAVOURING_LEISHMANIA_PARASITE_INFECTION	Details ...	39	0.58536	1.86307	0	0.0169827	0.218	1500	tags=51%, list=19%, signal=63%
REACTOME_TRANSPORT_OF_BILE_SALTS_AND_ORGANIC_ACIDS_METAL_IONS_AND_AMINE_COMPOUNDS	REACTOME_TRANSPORT_OF_BILE_SALTS_AND_ORGANIC_ACIDS_METAL_IONS_AND_AMINE_COMPOUNDS	Details ...	24	0.649839	1.85553	0	0.017356	0.242	982	tags=42%, list=12%, signal=47%
REACTOME_POST_TRANSLATIONAL_MODIFICATION_SYNTHESIS_OF_GPI_ANCHORED_PROTEINS	REACTOME_POST_TRANSLATIONAL_MODIFICATION_SYNTHESIS_OF_GPI_ANCHORED_PROTEINS	Details ...	19	0.690459	1.84072	0	0.0209164	0.302	1923	tags=79%, list=24%, signal=104%
REACTOME_GABA_RECEPTOR_ACTIVATION	REACTOME_GABA_RECEPTOR_ACTIVATION	Details ...	15	0.710051	1.82348	0	0.0246055	0.369	1500	tags=73%, list=19%, signal=90%
REACTOME_SPHINGOLIPID_DE_NOVO_BIOSYNTHESIS	REACTOME_SPHINGOLIPID_DE_NOVO_BIOSYNTHESIS	Details ...	26	0.620759	1.8162	0.00298954	0.025207	0.397	1154	tags=42%, list=14%, signal=49%
REACTOME_DEGRADATION_OF_THE_EXTRACELLULAR_MATRIX	REACTOME_DEGRADATION_OF_THE_EXTRACELLULAR_MATRIX	Details ...	47	0.559336	1.8154	0.0028777	0.0237258	0.399	599	tags=28%, list=8%, signal=30%
REACTOME_RAB_GERANYLGERANYLATION	REACTOME_RAB_GERANYLGERANYLATION	Details ...	45	0.557487	1.80305	0	0.0261449	0.444	3147	tags=82%, list=40%, signal=135%
REACTOME_ION_TRANSPORT_BY_P_TYPE_ATPASES	REACTOME_ION_TRANSPORT_BY_P_TYPE_ATPASES	Details ...	23	0.635585	1.79734	0	0.0267699	0.469	1936	tags=70%, list=24%, signal=92%
REACTOME_NON_INTEGRIN_MEMBRANE_ECM_INTERACTIONS	REACTOME_NON_INTEGRIN_MEMBRANE_ECM_INTERACTIONS	Details ...	27	0.600145	1.78984	0.0030303	0.027332	0.498	992	tags=37%, list=12%, signal=42%
REACTOME_G_ALPHA_12_13_SIGNALLING_EVENTS	REACTOME_G_ALPHA_12_13_SIGNALLING_EVENTS	Details ...	45	0.537025	1.76848	0.00148148	0.0349223	0.614	1625	tags=42%, list=20%, signal=53%
REACTOME_HDMS_DEMETHYLATE_HISTONES	REACTOME_HDMS_DEMETHYLATE_HISTONES		19	0.642236	1.75784	0.00160772	0.0390364	0.671	1516	tags=53%, list=19%, signal=65%
REACTOME_FATTY_ACID_METABOLISM	REACTOME_FATTY_ACID_METABOLISM		104	0.463931	1.7336	0.00134589	0.0497973	0.764	1437	tags=38%, list=18%, signal=45%
REACTOME_LAMININ_INTERACTIONS	REACTOME_LAMININ_INTERACTIONS		18	0.656828	1.72927	0.00322581	0.0502511	0.785	793	tags=44%, list=10%, signal=49%
REACTOME_MET_ACTIVATES_PTK2_SIGNALING	REACTOME_MET_ACTIVATES_PTK2_SIGNALING		15	0.665873	1.71784	0.00797448	0.0540094	0.82	1093	tags=40%, list=14%, signal=46%
REACTOME_THROMBIN_SIGNALLING_THROUGH_PROTEINASE_ACTIVATED_RECEPTORS_PARS	REACTOME_THROMBIN_SIGNALLING_THROUGH_PROTEINASE_ACTIVATED_RECEPTORS_PARS		19	0.633486	1.71204	0.00657895	0.0550865	0.838	1605	tags=47%, list=20%, signal=59%
REACTOME_SIGNAL_AMPLIFICATION	REACTOME_SIGNAL_AMPLIFICATION		17	0.64692	1.70718	0.00492611	0.0561353	0.853	1605	tags=59%, list=20%, signal=74%
REACTOME_SYNDECAN_INTERACTIONS	REACTOME_SYNDECAN_INTERACTIONS		15	0.671273	1.7066	0.00325203	0.0544512	0.855	1856	tags=60%, list=23%, signal=78%
REACTOME_G_ALPHA_Q_SIGNALLING_EVENTS	REACTOME_G_ALPHA_Q_SIGNALLING_EVENTS		53	0.508261	1.70172	0.00140647	0.0560194	0.873	2031	tags=47%, list=25%, signal=63%
REACTOME_SIGNALING_BY_RETINOIC_ACID	REACTOME_SIGNALING_BY_RETINOIC_ACID		25	0.596408	1.69586	0.00925926	0.0567763	0.883	1160	tags=36%, list=15%, signal=42%
REACTOME_FATTY_ACYL_COA_BIOSYNTHESIS	REACTOME_FATTY_ACYL_COA_BIOSYNTHESIS		24	0.596	1.69408	0.00627943	0.0559025	0.892	1067	tags=46%, list=13%, signal=53%
REACTOME_CELL_CELL_JUNCTION_ORGANIZATION	REACTOME_CELL_CELL_JUNCTION_ORGANIZATION		19	0.634358	1.68662	0.00491803	0.0582632	0.909	1104	tags=42%, list=14%, signal=49%
REACTOME_G_ALPHA_I_SIGNALLING_EVENTS	REACTOME_G_ALPHA_I_SIGNALLING_EVENTS		67	0.480218	1.68185	0.00416089	0.0599657	0.922	1546	tags=39%, list=19%, signal=48%
REACTOME_G_ALPHA_S_SIGNALLING_EVENTS	REACTOME_G_ALPHA_S_SIGNALLING_EVENTS		29	0.555438	1.67836	0.00306748	0.0607649	0.926	1500	tags=45%, list=19%, signal=55%
REACTOME_CYTOCHROME_P450_ARRANGED_BY_SUBSTRATE_TYPE	REACTOME_CYTOCHROME_P450_ARRANGED_BY_SUBSTRATE_TYPE		19	0.627299	1.66769	0.00465839	0.066893	0.944	796	tags=37%, list=10%, signal=41%
REACTOME_SLC_MEDIATED_TRANSMEMBRANE_TRANSPORT	REACTOME_SLC_MEDIATED_TRANSMEMBRANE_TRANSPORT		71	0.470367	1.65877	0.0014556	0.0720005	0.958	2161	tags=49%, list=27%, signal=67%
REACTOME_COLLAGEN_DEGRADATION	REACTOME_COLLAGEN_DEGRADATION		16	0.635518	1.65354	0.0162866	0.0733537	0.968	599	tags=31%, list=8%, signal=34%
REACTOME_O_LINKED_GLYCOSYLATION_OF_MUCINS	REACTOME_O_LINKED_GLYCOSYLATION_OF_MUCINS		22	0.596042	1.64807	0.00963082	0.0749179	0.972	1668	tags=50%, list=21%, signal=63%
REACTOME_EXTRACELLULAR_MATRIX_ORGANIZATION	REACTOME_EXTRACELLULAR_MATRIX_ORGANIZATION		105	0.440649	1.64352	0.00132275	0.0763187	0.974	992	tags=28%, list=12%, signal=31%
REACTOME_BIOLOGICAL_OXIDATIONS	REACTOME_BIOLOGICAL_OXIDATIONS		93	0.444294	1.64227	0.0027137	0.0753791	0.976	1050	tags=30%, list=13%, signal=34%
REACTOME_OPIOID_SIGNALLING	REACTOME_OPIOID_SIGNALLING		49	0.496419	1.6414	0.00418994	0.0741998	0.978	1534	tags=41%, list=19%, signal=50%
REACTOME_GLUCAGON_LIKE_PEPTIDE_1_GLP1_REGULATES_INSULIN_SECRETION	REACTOME_GLUCAGON_LIKE_PEPTIDE_1_GLP1_REGULATES_INSULIN_SECRETION		20	0.593562	1.63367	0.00907716	0.0782715	0.984	1493	tags=50%, list=19%, signal=61%
REACTOME_MET_PROMOTES_CELL_MOTILITY	REACTOME_MET_PROMOTES_CELL_MOTILITY		24	0.561239	1.63022	0.019174	0.0792529	0.984	1587	tags=38%, list=20%, signal=47%
REACTOME_BIOSYNTHESIS_OF_THE_N_GLYCAN_PRECURSOR_DOLICHOL_LIPID_LINKED_OLIGOSACCHARIDE_LLO_AND_TRANSFER_TO_A_NASCENT_PROTEIN	REACTOME_BIOSYNTHESIS_OF_THE_N_GLYCAN_PRECURSOR_DOLICHOL_LIPID_LINKED_OLIGOSACCHARIDE_LLO_AND_TRANSFER_TO_A_NASCENT_PROTEIN		43	0.499843	1.62876	0.0060423	0.0785452	0.986	1972	tags=47%, list=25%, signal=61%
REACTOME_SIGNALING_BY_GPCR	REACTOME_SIGNALING_BY_GPCR		154	0.407521	1.61942	0	0.0844068	0.99	1625	tags=33%, list=20%, signal=41%
REACTOME_GLYCOSPHINGOLIPID_METABOLISM	REACTOME_GLYCOSPHINGOLIPID_METABOLISM		28	0.551018	1.60731	0.00603318	0.0926935	0.998	1508	tags=57%, list=19%, signal=70%
REACTOME_NEUTROPHIL_DEGRANULATION	REACTOME_NEUTROPHIL_DEGRANULATION		295	0.385642	1.60396	0	0.0934652	0.999	2341	tags=44%, list=29%, signal=61%
REACTOME_PHASE_I_FUNCTIONALIZATION_OF_COMPOUNDS	REACTOME_PHASE_I_FUNCTIONALIZATION_OF_COMPOUNDS		40	0.503753	1.59689	0.0122511	0.0972535	0.999	1050	tags=38%, list=13%, signal=43%
REACTOME_METABOLISM_OF_LIPIDS	REACTOME_METABOLISM_OF_LIPIDS		442	0.36925	1.59603	0	0.0960248	0.999	1574	tags=32%, list=20%, signal=38%
REACTOME_PLATELET_HOMEOSTASIS	REACTOME_PLATELET_HOMEOSTASIS		38	0.508432	1.5939	0.00757576	0.095991	1	1936	tags=55%, list=24%, signal=73%
REACTOME_O_LINKED_GLYCOSYLATION	REACTOME_O_LINKED_GLYCOSYLATION		32	0.525687	1.58919	0.0148368	0.0982849	1	1890	tags=41%, list=24%, signal=53%
REACTOME_ARACHIDONIC_ACID_METABOLISM	REACTOME_ARACHIDONIC_ACID_METABOLISM		21	0.565059	1.58046	0.0267559	0.104539	1	664	tags=24%, list=8%, signal=26%
REACTOME_LEISHMANIA_INFECTION	REACTOME_LEISHMANIA_INFECTION		95	0.427638	1.569	0.00273973	0.113555	1	1640	tags=36%, list=21%, signal=45%
REACTOME_ADORA2B_MEDIATED_ANTI_INFLAMMATORY_CYTOKINES_PRODUCTION	REACTOME_ADORA2B_MEDIATED_ANTI_INFLAMMATORY_CYTOKINES_PRODUCTION		23	0.555104	1.5611	0.0331825	0.12022	1	1500	tags=52%, list=19%, signal=64%
REACTOME_GLUCAGON_SIGNALING_IN_METABOLIC_REGULATION	REACTOME_GLUCAGON_SIGNALING_IN_METABOLIC_REGULATION		17	0.597764	1.55693	0.0244698	0.123004	1	2607	tags=82%, list=33%, signal=122%
REACTOME_HEMOSTASIS	REACTOME_HEMOSTASIS		303	0.372708	1.55679	0	0.120905	1	1896	tags=35%, list=24%, signal=44%
REACTOME_AQUAPORIN_MEDIATED_TRANSPORT	REACTOME_AQUAPORIN_MEDIATED_TRANSPORT		21	0.568167	1.54937	0.0333333	0.126965	1	2607	tags=76%, list=33%, signal=113%
REACTOME_VASOPRESSIN_REGULATES_RENAL_WATER_HOMEOSTASIS_VIA_AQUAPORINS	REACTOME_VASOPRESSIN_REGULATES_RENAL_WATER_HOMEOSTASIS_VIA_AQUAPORINS		21	0.568167	1.54727	0.0348101	0.127133	1	2607	tags=76%, list=33%, signal=113%
REACTOME_G_PROTEIN_MEDIATED_EVENTS	REACTOME_G_PROTEIN_MEDIATED_EVENTS		31	0.511644	1.53961	0.0209268	0.133708	1	1534	tags=45%, list=19%, signal=56%
REACTOME_TRANSPORT_OF_SMALL_MOLECULES	REACTOME_TRANSPORT_OF_SMALL_MOLECULES		311	0.365524	1.53586	0.00117371	0.135903	1	1952	tags=36%, list=25%, signal=46%
REACTOME_GLYCOGEN_METABOLISM	REACTOME_GLYCOGEN_METABOLISM		18	0.5721	1.53415	0.0346908	0.13568	1	2348	tags=61%, list=29%, signal=86%
REACTOME_NEUROTRANSMITTER_RECEPTORS_AND_POSTSYNAPTIC_SIGNAL_TRANSMISSION	REACTOME_NEUROTRANSMITTER_RECEPTORS_AND_POSTSYNAPTIC_SIGNAL_TRANSMISSION		71	0.43446	1.53173	0.00964187	0.136074	1	2638	tags=51%, list=33%, signal=75%
REACTOME_ION_CHANNEL_TRANSPORT	REACTOME_ION_CHANNEL_TRANSPORT		67	0.432094	1.52666	0.00894188	0.139813	1	1936	tags=42%, list=24%, signal=55%
REACTOME_NRAGE_SIGNALS_DEATH_THROUGH_JNK	REACTOME_NRAGE_SIGNALS_DEATH_THROUGH_JNK		36	0.486785	1.52212	0.0239521	0.143042	1	2462	tags=50%, list=31%, signal=72%
REACTOME_PLATELET_ACTIVATION_SIGNALING_AND_AGGREGATION	REACTOME_PLATELET_ACTIVATION_SIGNALING_AND_AGGREGATION		138	0.384138	1.50618	0.00125945	0.160566	1	1616	tags=33%, list=20%, signal=40%
REACTOME_FCGR3A_MEDIATED_IL10_SYNTHESIS	REACTOME_FCGR3A_MEDIATED_IL10_SYNTHESIS		19	0.545139	1.49483	0.0387597	0.172244	1	1362	tags=42%, list=17%, signal=51%
REACTOME_FCERI_MEDIATED_CA_2_MOBILIZATION	REACTOME_FCERI_MEDIATED_CA_2_MOBILIZATION		18	0.555353	1.49046	0.0415335	0.175863	1	1721	tags=44%, list=22%, signal=57%
REACTOME_EXTRA_NUCLEAR_ESTROGEN_SIGNALING	REACTOME_EXTRA_NUCLEAR_ESTROGEN_SIGNALING		43	0.465536	1.4886	0.033189	0.175913	1	1827	tags=44%, list=23%, signal=57%
REACTOME_IRON_UPTAKE_AND_TRANSPORT	REACTOME_IRON_UPTAKE_AND_TRANSPORT		33	0.493966	1.48778	0.0310559	0.174471	1	953	tags=33%, list=12%, signal=38%
REACTOME_CELL_SURFACE_INTERACTIONS_AT_THE_VASCULAR_WALL	REACTOME_CELL_SURFACE_INTERACTIONS_AT_THE_VASCULAR_WALL		58	0.428833	1.48062	0.0289436	0.182645	1	1587	tags=33%, list=20%, signal=41%
REACTOME_HEPARAN_SULFATE_HEPARIN_HS_GAG_METABOLISM	REACTOME_HEPARAN_SULFATE_HEPARIN_HS_GAG_METABOLISM		20	0.537235	1.47935	0.0514469	0.181902	1	1164	tags=40%, list=15%, signal=47%
REACTOME_G_PROTEIN_BETA_GAMMA_SIGNALLING	REACTOME_G_PROTEIN_BETA_GAMMA_SIGNALLING		16	0.561141	1.46539	0.0454545	0.199551	1	1312	tags=44%, list=16%, signal=52%
REACTOME_RAB_GEFS_EXCHANGE_GTP_FOR_GDP_ON_RABS	REACTOME_RAB_GEFS_EXCHANGE_GTP_FOR_GDP_ON_RABS		73	0.412346	1.46331	0.0284091	0.200061	1	3126	tags=71%, list=39%, signal=116%
REACTOME_RAB_REGULATION_OF_TRAFFICKING	REACTOME_RAB_REGULATION_OF_TRAFFICKING		99	0.391919	1.45794	0.0166436	0.205411	1	3037	tags=62%, list=38%, signal=98%
REACTOME_TRAFFICKING_OF_AMPA_RECEPTORS	REACTOME_TRAFFICKING_OF_AMPA_RECEPTORS		15	0.57333	1.45605	0.0655462	0.20546	1	2574	tags=67%, list=32%, signal=98%
REACTOME_CLASS_I_PEROXISOMAL_MEMBRANE_PROTEIN_IMPORT	REACTOME_CLASS_I_PEROXISOMAL_MEMBRANE_PROTEIN_IMPORT		17	0.547866	1.45495	0.0623053	0.204498	1	1629	tags=53%, list=20%, signal=66%
REACTOME_SHC1_EVENTS_IN_ERBB2_SIGNALING	REACTOME_SHC1_EVENTS_IN_ERBB2_SIGNALING		15	0.572542	1.44797	0.0705128	0.212671	1	1896	tags=53%, list=24%, signal=70%
REACTOME_GLUCONEOGENESIS	REACTOME_GLUCONEOGENESIS		26	0.498644	1.44302	0.0631741	0.217839	1	1633	tags=50%, list=20%, signal=63%
REACTOME_INTEGRATION_OF_ENERGY_METABOLISM	REACTOME_INTEGRATION_OF_ENERGY_METABOLISM		54	0.423481	1.44179	0.042029	0.217051	1	1500	tags=41%, list=19%, signal=50%
REACTOME_TP53_REGULATES_TRANSCRIPTION_OF_CELL_DEATH_GENES	REACTOME_TP53_REGULATES_TRANSCRIPTION_OF_CELL_DEATH_GENES		26	0.484516	1.43686	0.0437406	0.222528	1	898	tags=27%, list=11%, signal=30%
REACTOME_RAS_PROCESSING	REACTOME_RAS_PROCESSING		15	0.559148	1.43541	0.0697306	0.221953	1	1576	tags=40%, list=20%, signal=50%
REACTOME_TRANSMISSION_ACROSS_CHEMICAL_SYNAPSES	REACTOME_TRANSMISSION_ACROSS_CHEMICAL_SYNAPSES		90	0.391577	1.43322	0.0177839	0.222673	1	2638	tags=51%, list=33%, signal=76%
REACTOME_CLASS_B_2_SECRETIN_FAMILY_RECEPTORS	REACTOME_CLASS_B_2_SECRETIN_FAMILY_RECEPTORS		16	0.556114	1.41939	0.0632091	0.24236	1	2398	tags=75%, list=30%, signal=107%
REACTOME_AMYLOID_FIBER_FORMATION	REACTOME_AMYLOID_FIBER_FORMATION		30	0.471223	1.41564	0.0607903	0.245873	1	1115	tags=30%, list=14%, signal=35%
REACTOME_ROLE_OF_PHOSPHOLIPIDS_IN_PHAGOCYTOSIS	REACTOME_ROLE_OF_PHOSPHOLIPIDS_IN_PHAGOCYTOSIS		15	0.547999	1.41348	0.0909091	0.247041	1	1896	tags=60%, list=24%, signal=79%
REACTOME_CELL_DEATH_SIGNALLING_VIA_NRAGE_NRIF_AND_NADE	REACTOME_CELL_DEATH_SIGNALLING_VIA_NRAGE_NRIF_AND_NADE		47	0.428269	1.41282	0.0541728	0.245445	1	2462	tags=49%, list=31%, signal=70%
REACTOME_SIGNALING_BY_MET	REACTOME_SIGNALING_BY_MET		56	0.415923	1.41004	0.0442478	0.247389	1	1587	tags=27%, list=20%, signal=33%
REACTOME_NUCLEOTIDE_SALVAGE	REACTOME_NUCLEOTIDE_SALVAGE		17	0.536538	1.40746	0.0838509	0.248893	1	1638	tags=41%, list=21%, signal=52%
REACTOME_ION_HOMEOSTASIS	REACTOME_ION_HOMEOSTASIS		20	0.519435	1.40665	0.0849057	0.247491	1	2108	tags=60%, list=26%, signal=81%
REACTOME_NCAM_SIGNALING_FOR_NEURITE_OUT_GROWTH	REACTOME_NCAM_SIGNALING_FOR_NEURITE_OUT_GROWTH		23	0.494146	1.40618	0.0783699	0.245527	1	1576	tags=39%, list=20%, signal=49%
REACTOME_REGULATION_OF_INSULIN_SECRETION	REACTOME_REGULATION_OF_INSULIN_SECRETION		35	0.457435	1.40245	0.0817236	0.249322	1	1778	tags=54%, list=22%, signal=70%
REACTOME_EPH_EPHRIN_MEDIATED_REPULSION_OF_CELLS	REACTOME_EPH_EPHRIN_MEDIATED_REPULSION_OF_CELLS		28	0.470491	1.402	0.0715397	0.247253	1	2294	tags=50%, list=29%, signal=70%
REACTOME_REGULATION_OF_TNFR1_SIGNALING	REACTOME_REGULATION_OF_TNFR1_SIGNALING		26	0.480713	1.40199	0.0741886	0.244565	1	953	tags=15%, list=12%, signal=17%
REACTOME_IMMUNOREGULATORY_INTERACTIONS_BETWEEN_A_LYMPHOID_AND_A_NON_LYMPHOID_CELL	REACTOME_IMMUNOREGULATORY_INTERACTIONS_BETWEEN_A_LYMPHOID_AND_A_NON_LYMPHOID_CELL		18	0.529029	1.39629	0.0889236	0.25147	1	1719	tags=61%, list=22%, signal=78%
REACTOME_SYNTHESIS_OF_SUBSTRATES_IN_N_GLYCAN_BIOSYTHESIS	REACTOME_SYNTHESIS_OF_SUBSTRATES_IN_N_GLYCAN_BIOSYTHESIS		33	0.454002	1.39001	0.0543807	0.259462	1	1972	tags=42%, list=25%, signal=56%
REACTOME_TRANSLATION_OF_SARS_COV_2_STRUCTURAL_PROTEINS	REACTOME_TRANSLATION_OF_SARS_COV_2_STRUCTURAL_PROTEINS		29	0.459528	1.38479	0.0822981	0.266218	1	2674	tags=52%, list=34%, signal=78%
REACTOME_SYNTHESIS_OF_PA	REACTOME_SYNTHESIS_OF_PA		22	0.49133	1.38264	0.0892019	0.267389	1	2054	tags=59%, list=26%, signal=79%
REACTOME_RHO_GTPASES_ACTIVATE_IQGAPS	REACTOME_RHO_GTPASES_ACTIVATE_IQGAPS		18	0.51252	1.37888	0.11353	0.270835	1	1667	tags=39%, list=21%, signal=49%
REACTOME_CARGO_CONCENTRATION_IN_THE_ER	REACTOME_CARGO_CONCENTRATION_IN_THE_ER		22	0.491419	1.37836	0.0866142	0.269026	1	2423	tags=45%, list=30%, signal=65%
REACTOME_INTEGRIN_CELL_SURFACE_INTERACTIONS	REACTOME_INTEGRIN_CELL_SURFACE_INTERACTIONS		31	0.445353	1.37295	0.0875576	0.276471	1	1322	tags=42%, list=17%, signal=50%
REACTOME_RHOG_GTPASE_CYCLE	REACTOME_RHOG_GTPASE_CYCLE		62	0.403569	1.3725	0.057423	0.274562	1	1587	tags=27%, list=20%, signal=34%
REACTOME_CLATHRIN_MEDIATED_ENDOCYTOSIS	REACTOME_CLATHRIN_MEDIATED_ENDOCYTOSIS		102	0.367326	1.36802	0.0380079	0.27986	1	2212	tags=35%, list=28%, signal=48%
REACTOME_SIGNALING_BY_ERYTHROPOIETIN	REACTOME_SIGNALING_BY_ERYTHROPOIETIN		18	0.511795	1.36402	0.0993485	0.284307	1	1726	tags=44%, list=22%, signal=57%
REACTOME_SIGNALING_BY_VEGF	REACTOME_SIGNALING_BY_VEGF		71	0.38115	1.35244	0.0749319	0.303509	1	1934	tags=38%, list=24%, signal=50%
REACTOME_BRANCHED_CHAIN_AMINO_ACID_CATABOLISM	REACTOME_BRANCHED_CHAIN_AMINO_ACID_CATABOLISM		17	0.510262	1.35022	0.104235	0.304616	1	1691	tags=41%, list=21%, signal=52%
REACTOME_SARS_COV_2_INFECTION	REACTOME_SARS_COV_2_INFECTION		48	0.411471	1.34525	0.0793201	0.311857	1	3039	tags=54%, list=38%, signal=87%
REACTOME_DEATH_RECEPTOR_SIGNALLING	REACTOME_DEATH_RECEPTOR_SIGNALLING		96	0.361045	1.34425	0.052774	0.310913	1	2484	tags=38%, list=31%, signal=54%
REACTOME_VXPX_CARGO_TARGETING_TO_CILIUM	REACTOME_VXPX_CARGO_TARGETING_TO_CILIUM		15	0.519237	1.33958	0.137763	0.317752	1	2803	tags=87%, list=35%, signal=133%
REACTOME_NEURONAL_SYSTEM	REACTOME_NEURONAL_SYSTEM		111	0.356166	1.33669	0.0419947	0.320851	1	2398	tags=43%, list=30%, signal=61%
REACTOME_DISEASES_OF_METABOLISM	REACTOME_DISEASES_OF_METABOLISM		113	0.35205	1.33576	0.0288336	0.319673	1	1111	tags=28%, list=14%, signal=32%
REACTOME_TRANSPORT_OF_INORGANIC_CATIONS_ANIONS_AND_AMINO_ACIDS_OLIGOPEPTIDES	REACTOME_TRANSPORT_OF_INORGANIC_CATIONS_ANIONS_AND_AMINO_ACIDS_OLIGOPEPTIDES		30	0.453494	1.33508	0.0988024	0.318087	1	2161	tags=53%, list=27%, signal=73%
REACTOME_P75_NTR_RECEPTOR_MEDIATED_SIGNALLING	REACTOME_P75_NTR_RECEPTOR_MEDIATED_SIGNALLING		63	0.386931	1.33465	0.0805085	0.316024	1	2484	tags=43%, list=31%, signal=62%
REACTOME_TRANSFERRIN_ENDOCYTOSIS_AND_RECYCLING	REACTOME_TRANSFERRIN_ENDOCYTOSIS_AND_RECYCLING		17	0.502737	1.33441	0.110236	0.313707	1	898	tags=29%, list=11%, signal=33%
REACTOME_PEROXISOMAL_LIPID_METABOLISM	REACTOME_PEROXISOMAL_LIPID_METABOLISM		22	0.466346	1.3338	0.114729	0.3122	1	1200	tags=36%, list=15%, signal=43%
REACTOME_PEROXISOMAL_PROTEIN_IMPORT	REACTOME_PEROXISOMAL_PROTEIN_IMPORT		43	0.413166	1.33284	0.0870871	0.311438	1	1290	tags=33%, list=16%, signal=39%
REACTOME_MATURATION_OF_SARS_COV_2_SPIKE_PROTEIN	REACTOME_MATURATION_OF_SARS_COV_2_SPIKE_PROTEIN		18	0.501341	1.33197	0.127625	0.310329	1	2985	tags=67%, list=37%, signal=106%
REACTOME_DOWNREGULATION_OF_ERBB2_SIGNALING	REACTOME_DOWNREGULATION_OF_ERBB2_SIGNALING		18	0.500682	1.32848	0.136842	0.314334	1	1531	tags=39%, list=19%, signal=48%
REACTOME_SIGNALING_BY_ERBB4	REACTOME_SIGNALING_BY_ERBB4		32	0.437071	1.32715	0.088647	0.314035	1	1783	tags=34%, list=22%, signal=44%
REACTOME_ANTIGEN_ACTIVATES_B_CELL_RECEPTOR_BCR_LEADING_TO_GENERATION_OF_SECOND_MESSENGERS	REACTOME_ANTIGEN_ACTIVATES_B_CELL_RECEPTOR_BCR_LEADING_TO_GENERATION_OF_SECOND_MESSENGERS		15	0.513323	1.32151	0.126418	0.322754	1	1057	tags=33%, list=13%, signal=38%
REACTOME_GPCR_LIGAND_BINDING	REACTOME_GPCR_LIGAND_BINDING		31	0.435391	1.3178	0.126154	0.327281	1	2398	tags=61%, list=30%, signal=87%
REACTOME_ASPARAGINE_N_LINKED_GLYCOSYLATION	REACTOME_ASPARAGINE_N_LINKED_GLYCOSYLATION		212	0.326728	1.31551	0.032491	0.329063	1	2438	tags=40%, list=31%, signal=56%
REACTOME_GPVI_MEDIATED_ACTIVATION_CASCADE	REACTOME_GPVI_MEDIATED_ACTIVATION_CASCADE		16	0.499816	1.3063	0.152459	0.344634	1	2718	tags=63%, list=34%, signal=95%
REACTOME_MITOCHONDRIAL_FATTY_ACID_BETA_OXIDATION	REACTOME_MITOCHONDRIAL_FATTY_ACID_BETA_OXIDATION		28	0.442804	1.30627	0.134441	0.341897	1	2195	tags=61%, list=28%, signal=84%
REACTOME_L1CAM_INTERACTIONS	REACTOME_L1CAM_INTERACTIONS		70	0.367198	1.30452	0.0808926	0.342722	1	2294	tags=41%, list=29%, signal=58%
REACTOME_PHASE_II_CONJUGATION_OF_COMPOUNDS	REACTOME_PHASE_II_CONJUGATION_OF_COMPOUNDS		50	0.394818	1.29413	0.10745	0.36181	1	1009	tags=24%, list=13%, signal=27%
REACTOME_OXIDATIVE_STRESS_INDUCED_SENESCENCE	REACTOME_OXIDATIVE_STRESS_INDUCED_SENESCENCE		52	0.383816	1.29371	0.120991	0.359874	1	2535	tags=44%, list=32%, signal=64%
REACTOME_GLYCOSAMINOGLYCAN_METABOLISM	REACTOME_GLYCOSAMINOGLYCAN_METABOLISM		48	0.386985	1.29202	0.127566	0.360584	1	1164	tags=29%, list=15%, signal=34%
REACTOME_GLUTATHIONE_CONJUGATION	REACTOME_GLUTATHIONE_CONJUGATION		22	0.460633	1.28438	0.148148	0.37377	1	966	tags=32%, list=12%, signal=36%
REACTOME_CDC42_GTPASE_CYCLE	REACTOME_CDC42_GTPASE_CYCLE		111	0.336035	1.28304	0.1	0.373486	1	2028	tags=32%, list=25%, signal=42%
REACTOME_STIMULI_SENSING_CHANNELS	REACTOME_STIMULI_SENSING_CHANNELS		34	0.416057	1.27967	0.11128	0.378051	1	1117	tags=29%, list=14%, signal=34%
REACTOME_INTERFERON_ALPHA_BETA_SIGNALING	REACTOME_INTERFERON_ALPHA_BETA_SIGNALING		39	0.405784	1.27923	0.136637	0.376017	1	1449	tags=31%, list=18%, signal=37%
REACTOME_SIGNALING_BY_ERBB2	REACTOME_SIGNALING_BY_ERBB2		37	0.409375	1.27844	0.137168	0.374771	1	1576	tags=30%, list=20%, signal=37%
REACTOME_FLT3_SIGNALING_IN_DISEASE	REACTOME_FLT3_SIGNALING_IN_DISEASE		23	0.445162	1.27711	0.162826	0.374792	1	1646	tags=35%, list=21%, signal=44%
REACTOME_RHOB_GTPASE_CYCLE	REACTOME_RHOB_GTPASE_CYCLE		59	0.371427	1.2741	0.106038	0.378446	1	2838	tags=54%, list=36%, signal=84%
REACTOME_PRC2_METHYLATES_HISTONES_AND_DNA	REACTOME_PRC2_METHYLATES_HISTONES_AND_DNA		16	0.485521	1.27317	0.161238	0.377527	1	2256	tags=50%, list=28%, signal=70%
REACTOME_ASSEMBLY_AND_CELL_SURFACE_PRESENTATION_OF_NMDA_RECEPTORS	REACTOME_ASSEMBLY_AND_CELL_SURFACE_PRESENTATION_OF_NMDA_RECEPTORS		15	0.495145	1.27138	0.175325	0.378701	1	1667	tags=40%, list=21%, signal=50%
REACTOME_COPI_MEDIATED_ANTEROGRADE_TRANSPORT	REACTOME_COPI_MEDIATED_ANTEROGRADE_TRANSPORT		78	0.356856	1.27094	0.0991735	0.377029	1	2850	tags=47%, list=36%, signal=73%
REACTOME_RAC1_GTPASE_CYCLE	REACTOME_RAC1_GTPASE_CYCLE		123	0.330634	1.26366	0.107868	0.389366	1	2792	tags=46%, list=35%, signal=69%
REACTOME_SIGNALING_BY_PTK6	REACTOME_SIGNALING_BY_PTK6		38	0.397799	1.26331	0.144597	0.387224	1	1576	tags=29%, list=20%, signal=36%
REACTOME_SYNTHESIS_OF_PIPS_AT_THE_PLASMA_MEMBRANE	REACTOME_SYNTHESIS_OF_PIPS_AT_THE_PLASMA_MEMBRANE		41	0.396338	1.25631	0.156977	0.399485	1	3009	tags=56%, list=38%, signal=90%
REACTOME_PI_METABOLISM	REACTOME_PI_METABOLISM		59	0.368917	1.2556	0.133333	0.398117	1	3009	tags=58%, list=38%, signal=92%
REACTOME_CASPASE_ACTIVATION_VIA_EXTRINSIC_APOPTOTIC_SIGNALLING_PATHWAY	REACTOME_CASPASE_ACTIVATION_VIA_EXTRINSIC_APOPTOTIC_SIGNALLING_PATHWAY		17	0.480304	1.25478	0.189711	0.396962	1	2340	tags=47%, list=29%, signal=66%
REACTOME_METABOLISM_OF_VITAMINS_AND_COFACTORS	REACTOME_METABOLISM_OF_VITAMINS_AND_COFACTORS		111	0.327343	1.25396	0.0972037	0.39606	1	1707	tags=33%, list=21%, signal=42%
REACTOME_RHOC_GTPASE_CYCLE	REACTOME_RHOC_GTPASE_CYCLE		65	0.35693	1.25379	0.126761	0.393697	1	2838	tags=51%, list=36%, signal=78%
REACTOME_SIGNALING_BY_NUCLEAR_RECEPTORS	REACTOME_SIGNALING_BY_NUCLEAR_RECEPTORS		157	0.317857	1.24864	0.0918239	0.402073	1	1597	tags=25%, list=20%, signal=30%
REACTOME_INTERLEUKIN_4_AND_INTERLEUKIN_13_SIGNALING	REACTOME_INTERLEUKIN_4_AND_INTERLEUKIN_13_SIGNALING		37	0.395434	1.24654	0.181149	0.403812	1	380	tags=16%, list=5%, signal=17%
REACTOME_TRANSPORT_TO_THE_GOLGI_AND_SUBSEQUENT_MODIFICATION	REACTOME_TRANSPORT_TO_THE_GOLGI_AND_SUBSEQUENT_MODIFICATION		132	0.32612	1.24349	0.0942211	0.407849	1	2803	tags=45%, list=35%, signal=68%
REACTOME_TRANSLATION_OF_SARS_COV_1_STRUCTURAL_PROTEINS	REACTOME_TRANSLATION_OF_SARS_COV_1_STRUCTURAL_PROTEINS		18	0.469363	1.24257	0.199021	0.40712	1	1431	tags=28%, list=18%, signal=34%
REACTOME_INITIATION_OF_NUCLEAR_ENVELOPE_NE_REFORMATION	REACTOME_INITIATION_OF_NUCLEAR_ENVELOPE_NE_REFORMATION		18	0.461017	1.23908	0.192557	0.412169	1	1960	tags=39%, list=25%, signal=51%
REACTOME_SIGNALING_BY_CSF3_G_CSF	REACTOME_SIGNALING_BY_CSF3_G_CSF		19	0.459149	1.238	0.192846	0.411686	1	1961	tags=37%, list=25%, signal=49%
REACTOME_ER_TO_GOLGI_ANTEROGRADE_TRANSPORT	REACTOME_ER_TO_GOLGI_ANTEROGRADE_TRANSPORT		118	0.328288	1.23703	0.113429	0.411119	1	3029	tags=51%, list=38%, signal=81%
REACTOME_TNFR1_INDUCED_NFKAPPAB_SIGNALING_PATHWAY	REACTOME_TNFR1_INDUCED_NFKAPPAB_SIGNALING_PATHWAY		23	0.435632	1.23641	0.205008	0.409739	1	953	tags=13%, list=12%, signal=15%
REACTOME_RAC2_GTPASE_CYCLE	REACTOME_RAC2_GTPASE_CYCLE		68	0.347446	1.2331	0.123563	0.414228	1	2641	tags=44%, list=33%, signal=65%
REACTOME_RAF_ACTIVATION	REACTOME_RAF_ACTIVATION		29	0.415022	1.23224	0.199067	0.413602	1	1834	tags=34%, list=23%, signal=45%
REACTOME_CARGO_RECOGNITION_FOR_CLATHRIN_MEDIATED_ENDOCYTOSIS	REACTOME_CARGO_RECOGNITION_FOR_CLATHRIN_MEDIATED_ENDOCYTOSIS		67	0.346831	1.22862	0.14978	0.419194	1	2205	tags=30%, list=28%, signal=41%
REACTOME_RETROGRADE_TRANSPORT_AT_THE_TRANS_GOLGI_NETWORK	REACTOME_RETROGRADE_TRANSPORT_AT_THE_TRANS_GOLGI_NETWORK		44	0.377187	1.22594	0.175182	0.422531	1	2530	tags=43%, list=32%, signal=63%
REACTOME_SIGNALING_BY_RECEPTOR_TYROSINE_KINASES	REACTOME_SIGNALING_BY_RECEPTOR_TYROSINE_KINASES		280	0.291788	1.22267	0.0725327	0.427403	1	1678	tags=25%, list=21%, signal=31%
REACTOME_DAG_AND_IP3_SIGNALING	REACTOME_DAG_AND_IP3_SIGNALING		26	0.414823	1.21822	0.20916	0.435097	1	1896	tags=42%, list=24%, signal=55%
REACTOME_METABOLISM_OF_CARBOHYDRATES	REACTOME_METABOLISM_OF_CARBOHYDRATES		177	0.304753	1.21534	0.132005	0.438873	1	1684	tags=29%, list=21%, signal=36%
REACTOME_APOPTOTIC_CLEAVAGE_OF_CELLULAR_PROTEINS	REACTOME_APOPTOTIC_CLEAVAGE_OF_CELLULAR_PROTEINS		27	0.410595	1.21501	0.197853	0.436964	1	2285	tags=33%, list=29%, signal=47%
REACTOME_NEGATIVE_REGULATION_OF_MAPK_PATHWAY	REACTOME_NEGATIVE_REGULATION_OF_MAPK_PATHWAY		32	0.399788	1.21478	0.197785	0.434753	1	1834	tags=34%, list=23%, signal=44%
REACTOME_RESPONSE_OF_MTB_TO_PHAGOCYTOSIS	REACTOME_RESPONSE_OF_MTB_TO_PHAGOCYTOSIS		19	0.443564	1.21233	0.212418	0.437503	1	953	tags=21%, list=12%, signal=24%
REACTOME_DISEASES_OF_CARBOHYDRATE_METABOLISM	REACTOME_DISEASES_OF_CARBOHYDRATE_METABOLISM		21	0.439931	1.2115	0.236593	0.436587	1	1062	tags=38%, list=13%, signal=44%
REACTOME_INTERLEUKIN_2_FAMILY_SIGNALING	REACTOME_INTERLEUKIN_2_FAMILY_SIGNALING		19	0.442798	1.20873	0.222045	0.440046	1	1961	tags=37%, list=25%, signal=49%
REACTOME_RHOF_GTPASE_CYCLE	REACTOME_RHOF_GTPASE_CYCLE		39	0.378469	1.20463	0.20524	0.446519	1	2818	tags=54%, list=35%, signal=83%
REACTOME_EPH_EPHRIN_SIGNALING	REACTOME_EPH_EPHRIN_SIGNALING		63	0.344731	1.20237	0.180536	0.448889	1	2702	tags=46%, list=34%, signal=69%
REACTOME_ONCOGENE_INDUCED_SENESCENCE	REACTOME_ONCOGENE_INDUCED_SENESCENCE		21	0.428642	1.19847	0.238924	0.455391	1	2016	tags=33%, list=25%, signal=45%
REACTOME_DEFECTS_IN_VITAMIN_AND_COFACTOR_METABOLISM	REACTOME_DEFECTS_IN_VITAMIN_AND_COFACTOR_METABOLISM		19	0.437616	1.19652	0.242236	0.45732	1	2133	tags=58%, list=27%, signal=79%
REACTOME_TBC_RABGAPS	REACTOME_TBC_RABGAPS		36	0.388698	1.19227	0.199706	0.464602	1	2977	tags=56%, list=37%, signal=88%
REACTOME_SENESCENCE_ASSOCIATED_SECRETORY_PHENOTYPE_SASP	REACTOME_SENESCENCE_ASSOCIATED_SECRETORY_PHENOTYPE_SASP		43	0.367967	1.19201	0.211511	0.462479	1	2372	tags=35%, list=30%, signal=49%
REACTOME_CRISTAE_FORMATION	REACTOME_CRISTAE_FORMATION		21	0.423431	1.19178	0.250814	0.460279	1	3014	tags=67%, list=38%, signal=107%
REACTOME_GAP_JUNCTION_TRAFFICKING_AND_REGULATION	REACTOME_GAP_JUNCTION_TRAFFICKING_AND_REGULATION		20	0.434616	1.19077	0.242765	0.460015	1	349	tags=15%, list=4%, signal=16%
REACTOME_METABOLISM_OF_WATER_SOLUBLE_VITAMINS_AND_COFACTORS	REACTOME_METABOLISM_OF_WATER_SOLUBLE_VITAMINS_AND_COFACTORS		83	0.328155	1.19055	0.173735	0.457892	1	1707	tags=31%, list=21%, signal=39%
REACTOME_DAP12_INTERACTIONS	REACTOME_DAP12_INTERACTIONS		18	0.444396	1.1807	0.254962	0.478429	1	3093	tags=72%, list=39%, signal=118%
REACTOME_COPII_MEDIATED_VESICLE_TRANSPORT	REACTOME_COPII_MEDIATED_VESICLE_TRANSPORT		54	0.349202	1.18023	0.196023	0.476806	1	3029	tags=56%, list=38%, signal=89%
REACTOME_DISEASES_OF_GLYCOSYLATION	REACTOME_DISEASES_OF_GLYCOSYLATION		59	0.345578	1.17971	0.217391	0.475234	1	1890	tags=39%, list=24%, signal=51%
REACTOME_TNF_SIGNALING	REACTOME_TNF_SIGNALING		33	0.385606	1.17645	0.229068	0.480367	1	1914	tags=24%, list=24%, signal=32%
REACTOME_MUSCLE_CONTRACTION	REACTOME_MUSCLE_CONTRACTION		50	0.353719	1.17287	0.213235	0.485963	1	2184	tags=46%, list=27%, signal=63%
REACTOME_EPHA_MEDIATED_GROWTH_CONE_COLLAPSE	REACTOME_EPHA_MEDIATED_GROWTH_CONE_COLLAPSE		17	0.445166	1.17107	0.273752	0.487512	1	1057	tags=24%, list=13%, signal=27%
REACTOME_SLC_TRANSPORTER_DISORDERS	REACTOME_SLC_TRANSPORTER_DISORDERS		46	0.358123	1.16981	0.230769	0.487702	1	1940	tags=28%, list=24%, signal=37%
REACTOME_RHOA_GTPASE_CYCLE	REACTOME_RHOA_GTPASE_CYCLE		113	0.306868	1.16677	0.176692	0.49219	1	2204	tags=37%, list=28%, signal=51%
REACTOME_INTERLEUKIN_12_SIGNALING	REACTOME_INTERLEUKIN_12_SIGNALING		35	0.378909	1.16372	0.24424	0.496528	1	289	tags=9%, list=4%, signal=9%
REACTOME_SIGNALING_BY_KIT_IN_DISEASE	REACTOME_SIGNALING_BY_KIT_IN_DISEASE		16	0.456844	1.16133	0.277419	0.499131	1	1646	tags=31%, list=21%, signal=39%
REACTOME_SYNTHESIS_OF_PC	REACTOME_SYNTHESIS_OF_PC		17	0.441059	1.16114	0.267717	0.496797	1	1329	tags=29%, list=17%, signal=35%
REACTOME_SIGNALING_BY_MODERATE_KINASE_ACTIVITY_BRAF_MUTANTS	REACTOME_SIGNALING_BY_MODERATE_KINASE_ACTIVITY_BRAF_MUTANTS		32	0.382764	1.15934	0.260677	0.49831	1	2122	tags=28%, list=27%, signal=38%
REACTOME_MEMBRANE_TRAFFICKING	REACTOME_MEMBRANE_TRAFFICKING		472	0.266686	1.15695	0.112676	0.500946	1	2455	tags=34%, list=31%, signal=46%
REACTOME_PROTEIN_LOCALIZATION	REACTOME_PROTEIN_LOCALIZATION		116	0.305659	1.15342	0.194892	0.50674	1	1446	tags=26%, list=18%, signal=31%
REACTOME_SEALING_OF_THE_NUCLEAR_ENVELOPE_NE_BY_ESCRT_III	REACTOME_SEALING_OF_THE_NUCLEAR_ENVELOPE_NE_BY_ESCRT_III		19	0.423029	1.15298	0.276699	0.505054	1	2547	tags=47%, list=32%, signal=69%
REACTOME_RAC3_GTPASE_CYCLE	REACTOME_RAC3_GTPASE_CYCLE		70	0.329439	1.15133	0.227011	0.506336	1	1960	tags=31%, list=25%, signal=41%
REACTOME_EPHB_MEDIATED_FORWARD_SIGNALING	REACTOME_EPHB_MEDIATED_FORWARD_SIGNALING		31	0.381511	1.14964	0.257967	0.50786	1	1634	tags=32%, list=21%, signal=40%
REACTOME_ECM_PROTEOGLYCANS	REACTOME_ECM_PROTEOGLYCANS		25	0.393428	1.13929	0.286159	0.529625	1	793	tags=28%, list=10%, signal=31%
REACTOME_SYNTHESIS_OF_IP3_AND_IP4_IN_THE_CYTOSOL	REACTOME_SYNTHESIS_OF_IP3_AND_IP4_IN_THE_CYTOSOL		16	0.438551	1.13263	0.315271	0.543026	1	1158	tags=31%, list=15%, signal=36%
REACTOME_DNA_DOUBLE_STRAND_BREAK_RESPONSE	REACTOME_DNA_DOUBLE_STRAND_BREAK_RESPONSE		37	0.367003	1.12835	0.301349	0.550521	1	1431	tags=24%, list=18%, signal=30%
REACTOME_INHIBITION_OF_DNA_RECOMBINATION_AT_TELOMERE	REACTOME_INHIBITION_OF_DNA_RECOMBINATION_AT_TELOMERE		19	0.415351	1.12718	0.310937	0.550549	1	131	tags=11%, list=2%, signal=11%
REACTOME_CREB1_PHOSPHORYLATION_THROUGH_NMDA_RECEPTOR_MEDIATED_ACTIVATION_OF_RAS_SIGNALING	REACTOME_CREB1_PHOSPHORYLATION_THROUGH_NMDA_RECEPTOR_MEDIATED_ACTIVATION_OF_RAS_SIGNALING		15	0.441657	1.12384	0.327815	0.555984	1	1576	tags=33%, list=20%, signal=41%
REACTOME_INTERLEUKIN_12_FAMILY_SIGNALING	REACTOME_INTERLEUKIN_12_FAMILY_SIGNALING		40	0.353295	1.11853	0.284444	0.566454	1	289	tags=8%, list=4%, signal=8%
REACTOME_FCGAMMA_RECEPTOR_FCGR_DEPENDENT_PHAGOCYTOSIS	REACTOME_FCGAMMA_RECEPTOR_FCGR_DEPENDENT_PHAGOCYTOSIS		60	0.333602	1.11715	0.280802	0.566902	1	1896	tags=32%, list=24%, signal=41%
REACTOME_NEGATIVE_REGULATION_OF_MET_ACTIVITY	REACTOME_NEGATIVE_REGULATION_OF_MET_ACTIVITY		16	0.428354	1.10955	0.334385	0.583506	1	953	tags=19%, list=12%, signal=21%
REACTOME_DISASSEMBLY_OF_THE_DESTRUCTION_COMPLEX_AND_RECRUITMENT_OF_AXIN_TO_THE_MEMBRANE	REACTOME_DISASSEMBLY_OF_THE_DESTRUCTION_COMPLEX_AND_RECRUITMENT_OF_AXIN_TO_THE_MEMBRANE		22	0.389788	1.10827	0.309451	0.583931	1	849	tags=27%, list=11%, signal=30%
REACTOME_TRANSCRIPTIONAL_REGULATION_OF_GRANULOPOIESIS	REACTOME_TRANSCRIPTIONAL_REGULATION_OF_GRANULOPOIESIS		23	0.387379	1.10809	0.327074	0.581439	1	380	tags=13%, list=5%, signal=14%
REACTOME_PEPTIDE_HORMONE_METABOLISM	REACTOME_PEPTIDE_HORMONE_METABOLISM		31	0.36249	1.09952	0.330218	0.600473	1	2452	tags=58%, list=31%, signal=84%
REACTOME_SIGNALING_BY_PDGF	REACTOME_SIGNALING_BY_PDGF		32	0.361624	1.09698	0.322727	0.604065	1	1726	tags=28%, list=22%, signal=36%
REACTOME_ENDOSOMAL_SORTING_COMPLEX_REQUIRED_FOR_TRANSPORT_ESCRT	REACTOME_ENDOSOMAL_SORTING_COMPLEX_REQUIRED_FOR_TRANSPORT_ESCRT		25	0.380131	1.09109	0.349693	0.615962	1	2847	tags=40%, list=36%, signal=62%
REACTOME_VESICLE_MEDIATED_TRANSPORT	REACTOME_VESICLE_MEDIATED_TRANSPORT		482	0.252332	1.08958	0.227669	0.616921	1	2455	tags=34%, list=31%, signal=46%
REACTOME_ONCOGENIC_MAPK_SIGNALING	REACTOME_ONCOGENIC_MAPK_SIGNALING		56	0.319218	1.0876	0.334752	0.618879	1	1842	tags=23%, list=23%, signal=30%
REACTOME_CHONDROITIN_SULFATE_DERMATAN_SULFATE_METABOLISM	REACTOME_CHONDROITIN_SULFATE_DERMATAN_SULFATE_METABOLISM		19	0.403409	1.08585	0.364472	0.620281	1	706	tags=26%, list=9%, signal=29%
REACTOME_REGULATION_OF_INSULIN_LIKE_GROWTH_FACTOR_IGF_TRANSPORT_AND_UPTAKE_BY_INSULIN_LIKE_GROWTH_FACTOR_BINDING_PROTEINS_IGFBPS	REACTOME_REGULATION_OF_INSULIN_LIKE_GROWTH_FACTOR_IGF_TRANSPORT_AND_UPTAKE_BY_INSULIN_LIKE_GROWTH_FACTOR_BINDING_PROTEINS_IGFBPS		58	0.318195	1.08533	0.332865	0.618563	1	1510	tags=31%, list=19%, signal=38%
REACTOME_SIGNALING_BY_FLT3_FUSION_PROTEINS	REACTOME_SIGNALING_BY_FLT3_FUSION_PROTEINS		17	0.415586	1.08524	0.362245	0.615759	1	1646	tags=35%, list=21%, signal=44%
REACTOME_DAP12_SIGNALING	REACTOME_DAP12_SIGNALING		16	0.416977	1.08388	0.379705	0.616342	1	3093	tags=69%, list=39%, signal=112%
REACTOME_LISTERIA_MONOCYTOGENES_ENTRY_INTO_HOST_CELLS	REACTOME_LISTERIA_MONOCYTOGENES_ENTRY_INTO_HOST_CELLS		17	0.413965	1.08247	0.363349	0.617073	1	953	tags=18%, list=12%, signal=20%
REACTOME_INFECTION_WITH_MYCOBACTERIUM_TUBERCULOSIS	REACTOME_INFECTION_WITH_MYCOBACTERIUM_TUBERCULOSIS		21	0.392244	1.07463	0.38924	0.634427	1	953	tags=19%, list=12%, signal=22%
REACTOME_NEGATIVE_REGULATION_OF_THE_PI3K_AKT_NETWORK	REACTOME_NEGATIVE_REGULATION_OF_THE_PI3K_AKT_NETWORK		48	0.324518	1.07266	0.351695	0.636432	1	1997	tags=33%, list=25%, signal=44%
REACTOME_BASIGIN_INTERACTIONS	REACTOME_BASIGIN_INTERACTIONS		16	0.41908	1.06444	0.382677	0.654716	1	982	tags=25%, list=12%, signal=28%
REACTOME_RIPK1_MEDIATED_REGULATED_NECROSIS	REACTOME_RIPK1_MEDIATED_REGULATED_NECROSIS		24	0.376654	1.06336	0.387247	0.654651	1	1914	tags=29%, list=24%, signal=38%
REACTOME_RHOD_GTPASE_CYCLE	REACTOME_RHOD_GTPASE_CYCLE		48	0.319329	1.06314	0.37574	0.65225	1	2818	tags=52%, list=35%, signal=80%
REACTOME_EGFR_DOWNREGULATION	REACTOME_EGFR_DOWNREGULATION		22	0.382535	1.05931	0.392523	0.658984	1	1586	tags=23%, list=20%, signal=28%
REACTOME_CONSTITUTIVE_SIGNALING_BY_ABERRANT_PI3K_IN_CANCER	REACTOME_CONSTITUTIVE_SIGNALING_BY_ABERRANT_PI3K_IN_CANCER		22	0.378949	1.05548	0.415123	0.665789	1	1726	tags=36%, list=22%, signal=46%
REACTOME_FORMATION_OF_THE_BETA_CATENIN_TCF_TRANSACTIVATING_COMPLEX	REACTOME_FORMATION_OF_THE_BETA_CATENIN_TCF_TRANSACTIVATING_COMPLEX		26	0.362381	1.05475	0.372274	0.664501	1	976	tags=15%, list=12%, signal=17%
REACTOME_RHO_GTPASE_CYCLE	REACTOME_RHO_GTPASE_CYCLE		319	0.248743	1.0521	0.333333	0.668637	1	2028	tags=28%, list=25%, signal=36%
REACTOME_PARASITE_INFECTION	REACTOME_PARASITE_INFECTION		39	0.333109	1.05159	0.37931	0.6668	1	2780	tags=44%, list=35%, signal=67%
REACTOME_SARS_COV_1_INFECTION	REACTOME_SARS_COV_1_INFECTION		36	0.336263	1.05032	0.38009	0.667061	1	3039	tags=44%, list=38%, signal=72%
REACTOME_PLASMA_LIPOPROTEIN_CLEARANCE	REACTOME_PLASMA_LIPOPROTEIN_CLEARANCE		17	0.405067	1.04931	0.404878	0.666614	1	2205	tags=47%, list=28%, signal=65%
REACTOME_CARDIAC_CONDUCTION	REACTOME_CARDIAC_CONDUCTION		24	0.367942	1.04832	0.383758	0.666196	1	2108	tags=54%, list=26%, signal=73%
REACTOME_NUCLEAR_SIGNALING_BY_ERBB4	REACTOME_NUCLEAR_SIGNALING_BY_ERBB4		15	0.414543	1.04705	0.398413	0.666552	1	1783	tags=33%, list=22%, signal=43%
REACTOME_MITOCHONDRIAL_TRNA_AMINOACYLATION	REACTOME_MITOCHONDRIAL_TRNA_AMINOACYLATION		20	0.385102	1.04514	0.406863	0.668356	1	2011	tags=45%, list=25%, signal=60%
REACTOME_SIGNALING_BY_ERBB2_IN_CANCER	REACTOME_SIGNALING_BY_ERBB2_IN_CANCER		18	0.391354	1.04226	0.401587	0.672734	1	1576	tags=28%, list=20%, signal=35%
REACTOME_INTEGRIN_SIGNALING	REACTOME_INTEGRIN_SIGNALING		15	0.400155	1.04139	0.400668	0.672072	1	3093	tags=53%, list=39%, signal=87%
REACTOME_CONDENSATION_OF_PROPHASE_CHROMOSOMES	REACTOME_CONDENSATION_OF_PROPHASE_CHROMOSOMES		20	0.38693	1.04054	0.417476	0.671307	1	976	tags=25%, list=12%, signal=28%
REACTOME_PYRUVATE_METABOLISM_AND_CITRIC_ACID_TCA_CYCLE	REACTOME_PYRUVATE_METABOLISM_AND_CITRIC_ACID_TCA_CYCLE		45	0.316727	1.03944	0.387481	0.671046	1	2176	tags=38%, list=27%, signal=52%
REACTOME_NEGATIVE_REGULATORS_OF_DDX58_IFIH1_SIGNALING	REACTOME_NEGATIVE_REGULATORS_OF_DDX58_IFIH1_SIGNALING		27	0.355848	1.03452	0.416801	0.680654	1	1155	tags=22%, list=14%, signal=26%
REACTOME_NICOTINATE_METABOLISM	REACTOME_NICOTINATE_METABOLISM		19	0.387029	1.03317	0.408064	0.681006	1	1695	tags=37%, list=21%, signal=47%
REACTOME_BETA_CATENIN_INDEPENDENT_WNT_SIGNALING	REACTOME_BETA_CATENIN_INDEPENDENT_WNT_SIGNALING		99	0.277332	1.03131	0.384	0.683014	1	1312	tags=19%, list=16%, signal=23%
REACTOME_ANTIGEN_PRESENTATION_FOLDING_ASSEMBLY_AND_PEPTIDE_LOADING_OF_CLASS_I_MHC	REACTOME_ANTIGEN_PRESENTATION_FOLDING_ASSEMBLY_AND_PEPTIDE_LOADING_OF_CLASS_I_MHC		23	0.356885	1.02166	0.434375	0.704538	1	1283	tags=26%, list=16%, signal=31%
REACTOME_ERCC6_CSB_AND_EHMT2_G9A_POSITIVELY_REGULATE_RRNA_EXPRESSION	REACTOME_ERCC6_CSB_AND_EHMT2_G9A_POSITIVELY_REGULATE_RRNA_EXPRESSION		23	0.362477	1.02144	0.422648	0.702019	1	976	tags=17%, list=12%, signal=20%
REACTOME_BUDDING_AND_MATURATION_OF_HIV_VIRION	REACTOME_BUDDING_AND_MATURATION_OF_HIV_VIRION		22	0.363457	1.02026	0.431962	0.702034	1	2847	tags=41%, list=36%, signal=63%
REACTOME_GLUCOSE_METABOLISM	REACTOME_GLUCOSE_METABOLISM		78	0.286898	1.01956	0.432961	0.700741	1	1994	tags=29%, list=25%, signal=39%
REACTOME_PLATELET_AGGREGATION_PLUG_FORMATION	REACTOME_PLATELET_AGGREGATION_PLUG_FORMATION		15	0.400155	1.01869	0.469551	0.699965	1	3093	tags=53%, list=39%, signal=87%
REACTOME_INTERFERON_GAMMA_SIGNALING	REACTOME_INTERFERON_GAMMA_SIGNALING		55	0.301577	1.01253	0.434426	0.712728	1	1771	tags=35%, list=22%, signal=44%
REACTOME_DISEASES_OF_PROGRAMMED_CELL_DEATH	REACTOME_DISEASES_OF_PROGRAMMED_CELL_DEATH		41	0.311534	1.00181	0.442478	0.737188	1	2340	tags=41%, list=29%, signal=58%
REACTOME_NOD1_2_SIGNALING_PATHWAY	REACTOME_NOD1_2_SIGNALING_PATHWAY		27	0.341428	0.999708	0.483969	0.73962	1	1631	tags=22%, list=20%, signal=28%
REACTOME_TP53_REGULATES_TRANSCRIPTION_OF_CELL_CYCLE_GENES	REACTOME_TP53_REGULATES_TRANSCRIPTION_OF_CELL_CYCLE_GENES		37	0.32022	0.997034	0.462575	0.743447	1	393	tags=11%, list=5%, signal=11%
REACTOME_MAP2K_AND_MAPK_ACTIVATION	REACTOME_MAP2K_AND_MAPK_ACTIVATION		28	0.340486	0.991069	0.471927	0.755898	1	3012	tags=46%, list=38%, signal=74%
REACTOME_ESTROGEN_DEPENDENT_NUCLEAR_EVENTS_DOWNSTREAM_OF_ESR_MEMBRANE_SIGNALING	REACTOME_ESTROGEN_DEPENDENT_NUCLEAR_EVENTS_DOWNSTREAM_OF_ESR_MEMBRANE_SIGNALING		15	0.386249	0.989695	0.483607	0.756343	1	1801	tags=40%, list=23%, signal=52%
REACTOME_ACTIVATED_NOTCH1_TRANSMITS_SIGNAL_TO_THE_NUCLEUS	REACTOME_ACTIVATED_NOTCH1_TRANSMITS_SIGNAL_TO_THE_NUCLEUS		18	0.377901	0.98856	0.468315	0.756011	1	953	tags=22%, list=12%, signal=25%
REACTOME_MEIOTIC_RECOMBINATION	REACTOME_MEIOTIC_RECOMBINATION		27	0.342236	0.985446	0.491704	0.761116	1	2362	tags=41%, list=30%, signal=58%
REACTOME_TRANSLOCATION_OF_SLC2A4_GLUT4_TO_THE_PLASMA_MEMBRANE	REACTOME_TRANSLOCATION_OF_SLC2A4_GLUT4_TO_THE_PLASMA_MEMBRANE		52	0.293701	0.985258	0.486252	0.758514	1	2934	tags=54%, list=37%, signal=85%
REACTOME_PI3K_AKT_SIGNALING_IN_CANCER	REACTOME_PI3K_AKT_SIGNALING_IN_CANCER		44	0.308224	0.980242	0.501429	0.768292	1	2494	tags=41%, list=31%, signal=59%
REACTOME_VISUAL_PHOTOTRANSDUCTION	REACTOME_VISUAL_PHOTOTRANSDUCTION		31	0.327992	0.976379	0.49771	0.775188	1	1530	tags=32%, list=19%, signal=40%
REACTOME_SMOOTH_MUSCLE_CONTRACTION	REACTOME_SMOOTH_MUSCLE_CONTRACTION		21	0.354008	0.974821	0.50546	0.775875	1	440	tags=14%, list=6%, signal=15%
REACTOME_VEGFR2_MEDIATED_VASCULAR_PERMEABILITY	REACTOME_VEGFR2_MEDIATED_VASCULAR_PERMEABILITY		18	0.372561	0.97159	0.500838	0.781018	1	2557	tags=56%, list=32%, signal=82%
REACTOME_RUNX1_REGULATES_GENES_INVOLVED_IN_MEGAKARYOCYTE_DIFFERENTIATION_AND_PLATELET_FUNCTION	REACTOME_RUNX1_REGULATES_GENES_INVOLVED_IN_MEGAKARYOCYTE_DIFFERENTIATION_AND_PLATELET_FUNCTION		33	0.320303	0.971395	0.500756	0.778374	1	1259	tags=15%, list=16%, signal=18%
REACTOME_REPRODUCTION	REACTOME_REPRODUCTION		49	0.292029	0.965023	0.51768	0.791154	1	2362	tags=35%, list=30%, signal=49%
REACTOME_GENE_AND_PROTEIN_EXPRESSION_BY_JAK_STAT_SIGNALING_AFTER_INTERLEUKIN_12_STIMULATION	REACTOME_GENE_AND_PROTEIN_EXPRESSION_BY_JAK_STAT_SIGNALING_AFTER_INTERLEUKIN_12_STIMULATION		30	0.322294	0.963552	0.527692	0.791771	1	289	tags=7%, list=4%, signal=7%
REACTOME_SIGNALING_BY_FGFR3	REACTOME_SIGNALING_BY_FGFR3		23	0.337179	0.962047	0.521944	0.792474	1	1576	tags=22%, list=20%, signal=27%
REACTOME_NUCLEAR_ENVELOPE_NE_REASSEMBLY	REACTOME_NUCLEAR_ENVELOPE_NE_REASSEMBLY		62	0.275566	0.960453	0.537143	0.79333	1	2333	tags=29%, list=29%, signal=41%
REACTOME_ESR_MEDIATED_SIGNALING	REACTOME_ESR_MEDIATED_SIGNALING		114	0.254993	0.958254	0.540155	0.795851	1	1597	tags=23%, list=20%, signal=28%
REACTOME_SIGNALING_BY_EGFR_IN_CANCER	REACTOME_SIGNALING_BY_EGFR_IN_CANCER		18	0.356112	0.948317	0.524193	0.817968	1	1576	tags=28%, list=20%, signal=35%
REACTOME_SIGNALING_BY_BRAF_AND_RAF_FUSIONS	REACTOME_SIGNALING_BY_BRAF_AND_RAF_FUSIONS		45	0.287854	0.947611	0.548781	0.816495	1	1842	tags=20%, list=23%, signal=26%
REACTOME_INSULIN_PROCESSING	REACTOME_INSULIN_PROCESSING		17	0.359144	0.947057	0.527646	0.814748	1	2452	tags=65%, list=31%, signal=93%
REACTOME_MITOCHONDRIAL_CALCIUM_ION_TRANSPORT	REACTOME_MITOCHONDRIAL_CALCIUM_ION_TRANSPORT		19	0.353671	0.945	0.566667	0.816783	1	2808	tags=47%, list=35%, signal=73%
REACTOME_ENERGY_DEPENDENT_REGULATION_OF_MTOR_BY_LKB1_AMPK	REACTOME_ENERGY_DEPENDENT_REGULATION_OF_MTOR_BY_LKB1_AMPK		19	0.34085	0.943889	0.53211	0.816416	1	3578	tags=68%, list=45%, signal=124%
REACTOME_COOPERATION_OF_PDCL_PHLP1_AND_TRIC_CCT_IN_G_PROTEIN_BETA_FOLDING	REACTOME_COOPERATION_OF_PDCL_PHLP1_AND_TRIC_CCT_IN_G_PROTEIN_BETA_FOLDING		23	0.331052	0.937432	0.55887	0.829155	1	1312	tags=30%, list=16%, signal=36%
REACTOME_CELLULAR_SENESCENCE	REACTOME_CELLULAR_SENESCENCE		105	0.252747	0.936895	0.589947	0.827278	1	976	tags=13%, list=12%, signal=15%
REACTOME_SIGNALING_BY_RHO_GTPASES_MIRO_GTPASES_AND_RHOBTB3	REACTOME_SIGNALING_BY_RHO_GTPASES_MIRO_GTPASES_AND_RHOBTB3		492	0.214926	0.932424	0.687912	0.835281	1	2045	tags=26%, list=26%, signal=33%
REACTOME_NEUREXINS_AND_NEUROLIGINS	REACTOME_NEUREXINS_AND_NEUROLIGINS		18	0.343208	0.923252	0.585089	0.854985	1	2238	tags=44%, list=28%, signal=62%
REACTOME_MEIOTIC_SYNAPSIS	REACTOME_MEIOTIC_SYNAPSIS		25	0.31731	0.912416	0.595813	0.87818	1	2533	tags=40%, list=32%, signal=58%
REACTOME_MAPK_FAMILY_SIGNALING_CASCADES	REACTOME_MAPK_FAMILY_SIGNALING_CASCADES		183	0.226767	0.910704	0.663354	0.879217	1	1842	tags=26%, list=23%, signal=33%
REACTOME_PRE_NOTCH_EXPRESSION_AND_PROCESSING	REACTOME_PRE_NOTCH_EXPRESSION_AND_PROCESSING		37	0.290429	0.908191	0.587597	0.882121	1	2585	tags=49%, list=32%, signal=72%
REACTOME_PROTEIN_PROTEIN_INTERACTIONS_AT_SYNAPSES	REACTOME_PROTEIN_PROTEIN_INTERACTIONS_AT_SYNAPSES		29	0.30104	0.90639	0.58466	0.883269	1	1749	tags=34%, list=22%, signal=44%
REACTOME_LATE_ENDOSOMAL_MICROAUTOPHAGY	REACTOME_LATE_ENDOSOMAL_MICROAUTOPHAGY		22	0.322313	0.902187	0.599688	0.890501	1	2847	tags=50%, list=36%, signal=78%
REACTOME_RHOQ_GTPASE_CYCLE	REACTOME_RHOQ_GTPASE_CYCLE		46	0.273205	0.898734	0.627907	0.895363	1	2093	tags=30%, list=26%, signal=41%
REACTOME_RESPONSE_TO_ELEVATED_PLATELET_CYTOSOLIC_CA2	REACTOME_RESPONSE_TO_ELEVATED_PLATELET_CYTOSOLIC_CA2		72	0.2515	0.895791	0.650406	0.899297	1	1616	tags=24%, list=20%, signal=29%
REACTOME_INTRA_GOLGI_AND_RETROGRADE_GOLGI_TO_ER_TRAFFIC	REACTOME_INTRA_GOLGI_AND_RETROGRADE_GOLGI_TO_ER_TRAFFIC		160	0.227049	0.893507	0.698595	0.901374	1	2438	tags=32%, list=31%, signal=45%
REACTOME_NEPHRIN_FAMILY_INTERACTIONS	REACTOME_NEPHRIN_FAMILY_INTERACTIONS		15	0.348883	0.892231	0.623605	0.901095	1	3536	tags=73%, list=44%, signal=132%
REACTOME_APC_C_CDC20_MEDIATED_DEGRADATION_OF_CYCLIN_B	REACTOME_APC_C_CDC20_MEDIATED_DEGRADATION_OF_CYCLIN_B		19	0.327344	0.885667	0.617694	0.913179	1	953	tags=16%, list=12%, signal=18%
REACTOME_RHO_GTPASES_ACTIVATE_WASPS_AND_WAVES	REACTOME_RHO_GTPASES_ACTIVATE_WASPS_AND_WAVES		27	0.305398	0.883612	0.640867	0.914825	1	3178	tags=52%, list=40%, signal=86%
REACTOME_SIGNALING_BY_SCF_KIT	REACTOME_SIGNALING_BY_SCF_KIT		30	0.290746	0.880764	0.634029	0.918434	1	1646	tags=27%, list=21%, signal=33%
REACTOME_TP53_REGULATES_TRANSCRIPTION_OF_ADDITIONAL_CELL_CYCLE_GENES_WHOSE_EXACT_ROLE_IN_THE_P53_PATHWAY_REMAIN_UNCERTAIN	REACTOME_TP53_REGULATES_TRANSCRIPTION_OF_ADDITIONAL_CELL_CYCLE_GENES_WHOSE_EXACT_ROLE_IN_THE_P53_PATHWAY_REMAIN_UNCERTAIN		16	0.343456	0.879376	0.650741	0.918331	1	2194	tags=31%, list=28%, signal=43%
REACTOME_DISEASES_ASSOCIATED_WITH_O_GLYCOSYLATION_OF_PROTEINS	REACTOME_DISEASES_ASSOCIATED_WITH_O_GLYCOSYLATION_OF_PROTEINS		18	0.333419	0.877588	0.639291	0.919232	1	484	tags=17%, list=6%, signal=18%
REACTOME_PYRUVATE_METABOLISM	REACTOME_PYRUVATE_METABOLISM		21	0.313643	0.877205	0.623639	0.916829	1	225	tags=10%, list=3%, signal=10%
REACTOME_RHOV_GTPASE_CYCLE	REACTOME_RHOV_GTPASE_CYCLE		32	0.282671	0.877145	0.639319	0.913721	1	1785	tags=22%, list=22%, signal=28%
REACTOME_MEIOSIS	REACTOME_MEIOSIS		46	0.271181	0.876427	0.675872	0.912078	1	2362	tags=33%, list=30%, signal=46%
REACTOME_SIGNALLING_TO_ERKS	REACTOME_SIGNALLING_TO_ERKS		26	0.302689	0.873982	0.63964	0.91439	1	2057	tags=27%, list=26%, signal=36%
REACTOME_CTLA4_INHIBITORY_SIGNALING	REACTOME_CTLA4_INHIBITORY_SIGNALING		15	0.336675	0.867926	0.64297	0.92443	1	1834	tags=33%, list=23%, signal=43%
REACTOME_NUCLEOTIDE_BINDING_DOMAIN_LEUCINE_RICH_REPEAT_CONTAINING_RECEPTOR_NLR_SIGNALING_PATHWAYS	REACTOME_NUCLEOTIDE_BINDING_DOMAIN_LEUCINE_RICH_REPEAT_CONTAINING_RECEPTOR_NLR_SIGNALING_PATHWAYS		38	0.277587	0.866039	0.687776	0.925623	1	1631	tags=21%, list=20%, signal=26%
REACTOME_REGULATED_NECROSIS	REACTOME_REGULATED_NECROSIS		41	0.268569	0.86571	0.700599	0.923111	1	2878	tags=44%, list=36%, signal=68%
REACTOME_ACTIVATION_OF_NMDA_RECEPTORS_AND_POSTSYNAPTIC_EVENTS	REACTOME_ACTIVATION_OF_NMDA_RECEPTORS_AND_POSTSYNAPTIC_EVENTS		44	0.266021	0.864877	0.688501	0.921759	1	3012	tags=45%, list=38%, signal=73%
REACTOME_OVARIAN_TUMOR_DOMAIN_PROTEASES	REACTOME_OVARIAN_TUMOR_DOMAIN_PROTEASES		25	0.297702	0.862078	0.684127	0.924766	1	953	tags=12%, list=12%, signal=14%
REACTOME_INTERFERON_SIGNALING	REACTOME_INTERFERON_SIGNALING		135	0.220462	0.858989	0.777045	0.928285	1	1449	tags=20%, list=18%, signal=24%
REACTOME_COPI_DEPENDENT_GOLGI_TO_ER_RETROGRADE_TRAFFIC	REACTOME_COPI_DEPENDENT_GOLGI_TO_ER_RETROGRADE_TRAFFIC		71	0.242731	0.856865	0.74548	0.929561	1	2803	tags=39%, list=35%, signal=60%
REACTOME_FACTORS_INVOLVED_IN_MEGAKARYOCYTE_DEVELOPMENT_AND_PLATELET_PRODUCTION	REACTOME_FACTORS_INVOLVED_IN_MEGAKARYOCYTE_DEVELOPMENT_AND_PLATELET_PRODUCTION		86	0.232685	0.849883	0.743692	0.941272	1	976	tags=13%, list=12%, signal=14%
REACTOME_B_WICH_COMPLEX_POSITIVELY_REGULATES_RRNA_EXPRESSION	REACTOME_B_WICH_COMPLEX_POSITIVELY_REGULATES_RRNA_EXPRESSION		32	0.274265	0.848758	0.685841	0.940335	1	976	tags=19%, list=12%, signal=21%
REACTOME_NEF_MEDIATES_DOWN_MODULATION_OF_CELL_SURFACE_RECEPTORS_BY_RECRUITING_THEM_TO_CLATHRIN_ADAPTERS	REACTOME_NEF_MEDIATES_DOWN_MODULATION_OF_CELL_SURFACE_RECEPTORS_BY_RECRUITING_THEM_TO_CLATHRIN_ADAPTERS		16	0.317144	0.84643	0.68254	0.941998	1	3139	tags=56%, list=39%, signal=93%
REACTOME_SIGNALING_BY_WNT	REACTOME_SIGNALING_BY_WNT		173	0.213521	0.845816	0.786531	0.940048	1	1312	tags=16%, list=16%, signal=19%
REACTOME_CYCLIN_D_ASSOCIATED_EVENTS_IN_G1	REACTOME_CYCLIN_D_ASSOCIATED_EVENTS_IN_G1		31	0.279639	0.844107	0.681388	0.94039	1	1136	tags=19%, list=14%, signal=22%
REACTOME_RHO_GTPASE_EFFECTORS	REACTOME_RHO_GTPASE_EFFECTORS		205	0.207671	0.841993	0.835396	0.941569	1	1676	tags=21%, list=21%, signal=26%
REACTOME_SIGNALING_BY_FGFR1	REACTOME_SIGNALING_BY_FGFR1		26	0.291005	0.838834	0.702955	0.945003	1	2032	tags=27%, list=26%, signal=36%
REACTOME_INTERLEUKIN_3_INTERLEUKIN_5_AND_GM_CSF_SIGNALING	REACTOME_INTERLEUKIN_3_INTERLEUKIN_5_AND_GM_CSF_SIGNALING		28	0.282709	0.838832	0.704441	0.941826	1	1961	tags=29%, list=25%, signal=38%
REACTOME_MITOTIC_PROPHASE	REACTOME_MITOTIC_PROPHASE		85	0.230486	0.838589	0.772135	0.939163	1	2043	tags=25%, list=26%, signal=33%
REACTOME_SEMAPHORIN_INTERACTIONS	REACTOME_SEMAPHORIN_INTERACTIONS		43	0.265035	0.838072	0.732224	0.937107	1	2606	tags=40%, list=33%, signal=58%
REACTOME_CA_DEPENDENT_EVENTS	REACTOME_CA_DEPENDENT_EVENTS		21	0.298727	0.822144	0.723473	0.966249	1	2638	tags=52%, list=33%, signal=78%
REACTOME_NR1H3_NR1H2_REGULATE_GENE_EXPRESSION_LINKED_TO_CHOLESTEROL_TRANSPORT_AND_EFFLUX	REACTOME_NR1H3_NR1H2_REGULATE_GENE_EXPRESSION_LINKED_TO_CHOLESTEROL_TRANSPORT_AND_EFFLUX		26	0.281354	0.820901	0.716772	0.965385	1	1343	tags=19%, list=17%, signal=23%
REACTOME_RMTS_METHYLATE_HISTONE_ARGININES	REACTOME_RMTS_METHYLATE_HISTONE_ARGININES		32	0.267752	0.820674	0.728083	0.962605	1	104	tags=6%, list=1%, signal=6%
REACTOME_TRANSCRIPTIONAL_REGULATION_BY_SMALL_RNAS	REACTOME_TRANSCRIPTIONAL_REGULATION_BY_SMALL_RNAS		49	0.247003	0.81534	0.782609	0.969662	1	3378	tags=49%, list=42%, signal=85%
REACTOME_GOLGI_TO_ER_RETROGRADE_TRANSPORT	REACTOME_GOLGI_TO_ER_RETROGRADE_TRANSPORT		100	0.221121	0.814711	0.832197	0.967728	1	2831	tags=39%, list=36%, signal=60%
REACTOME_RHOJ_GTPASE_CYCLE	REACTOME_RHOJ_GTPASE_CYCLE		43	0.250621	0.811074	0.763425	0.971357	1	2028	tags=26%, list=25%, signal=34%
REACTOME_SARS_COV_INFECTIONS	REACTOME_SARS_COV_INFECTIONS		107	0.215167	0.808913	0.837178	0.972291	1	2210	tags=24%, list=28%, signal=33%
REACTOME_INTRA_GOLGI_TRAFFIC	REACTOME_INTRA_GOLGI_TRAFFIC		39	0.251342	0.808116	0.771472	0.970463	1	2313	tags=36%, list=29%, signal=50%
REACTOME_CONSTITUTIVE_SIGNALING_BY_AKT1_E17K_IN_CANCER	REACTOME_CONSTITUTIVE_SIGNALING_BY_AKT1_E17K_IN_CANCER		21	0.289324	0.80388	0.756289	0.97527	1	2399	tags=38%, list=30%, signal=54%
REACTOME_RND1_GTPASE_CYCLE	REACTOME_RND1_GTPASE_CYCLE		28	0.263844	0.787483	0.75663	1	1	1781	tags=25%, list=22%, signal=32%
REACTOME_E3_UBIQUITIN_LIGASES_UBIQUITINATE_TARGET_PROTEINS	REACTOME_E3_UBIQUITIN_LIGASES_UBIQUITINATE_TARGET_PROTEINS		35	0.248497	0.784556	0.81791	1	1	1290	tags=23%, list=16%, signal=27%
REACTOME_NERVOUS_SYSTEM_DEVELOPMENT	REACTOME_NERVOUS_SYSTEM_DEVELOPMENT		358	0.185251	0.784025	0.965909	1	1	2610	tags=32%, list=33%, signal=46%
REACTOME_INTRACELLULAR_SIGNALING_BY_SECOND_MESSENGERS	REACTOME_INTRACELLULAR_SIGNALING_BY_SECOND_MESSENGERS		199	0.195599	0.780933	0.922604	1	1	1834	tags=22%, list=23%, signal=27%
REACTOME_SYNTHESIS_OF_ACTIVE_UBIQUITIN_ROLES_OF_E1_AND_E2_ENZYMES	REACTOME_SYNTHESIS_OF_ACTIVE_UBIQUITIN_ROLES_OF_E1_AND_E2_ENZYMES		23	0.278844	0.779469	0.764521	1	1	953	tags=17%, list=12%, signal=20%
REACTOME_RND3_GTPASE_CYCLE	REACTOME_RND3_GTPASE_CYCLE		29	0.25473	0.771035	0.782324	1	1	2835	tags=45%, list=36%, signal=69%
REACTOME_COPI_INDEPENDENT_GOLGI_TO_ER_RETROGRADE_TRAFFIC	REACTOME_COPI_INDEPENDENT_GOLGI_TO_ER_RETROGRADE_TRAFFIC		36	0.245596	0.766637	0.822388	1	1	2438	tags=36%, list=31%, signal=52%
REACTOME_REGULATION_OF_TP53_EXPRESSION_AND_DEGRADATION	REACTOME_REGULATION_OF_TP53_EXPRESSION_AND_DEGRADATION		26	0.26212	0.765957	0.812303	1	1	2497	tags=42%, list=31%, signal=61%
REACTOME_SENSORY_PROCESSING_OF_SOUND_BY_OUTER_HAIR_CELLS_OF_THE_COCHLEA	REACTOME_SENSORY_PROCESSING_OF_SOUND_BY_OUTER_HAIR_CELLS_OF_THE_COCHLEA		22	0.275372	0.765914	0.787167	1	1	2606	tags=59%, list=33%, signal=88%
REACTOME_FLT3_SIGNALING	REACTOME_FLT3_SIGNALING		25	0.26427	0.762489	0.807813	1	1	1801	tags=32%, list=23%, signal=41%
REACTOME_DNA_DAMAGE_TELOMERE_STRESS_INDUCED_SENESCENCE	REACTOME_DNA_DAMAGE_TELOMERE_STRESS_INDUCED_SENESCENCE		30	0.253351	0.758953	0.797256	1	1	380	tags=10%, list=5%, signal=10%
REACTOME_ANTIVIRAL_MECHANISM_BY_IFN_STIMULATED_GENES	REACTOME_ANTIVIRAL_MECHANISM_BY_IFN_STIMULATED_GENES		75	0.211603	0.756128	0.888889	1	1	1155	tags=15%, list=14%, signal=17%
REACTOME_THE_ROLE_OF_NEF_IN_HIV_1_REPLICATION_AND_DISEASE_PATHOGENESIS	REACTOME_THE_ROLE_OF_NEF_IN_HIV_1_REPLICATION_AND_DISEASE_PATHOGENESIS		18	0.287487	0.755875	0.801029	1	1	3139	tags=56%, list=39%, signal=91%
REACTOME_FANCONI_ANEMIA_PATHWAY	REACTOME_FANCONI_ANEMIA_PATHWAY		25	0.259069	0.752625	0.810769	1	1	2925	tags=44%, list=37%, signal=69%
REACTOME_RET_SIGNALING	REACTOME_RET_SIGNALING		22	0.270176	0.750547	0.806854	1	1	2641	tags=36%, list=33%, signal=54%
REACTOME_METABOLISM_OF_AMINO_ACIDS_AND_DERIVATIVES	REACTOME_METABOLISM_OF_AMINO_ACIDS_AND_DERIVATIVES		254	0.181958	0.750423	0.973995	1	1	1152	tags=13%, list=14%, signal=15%
REACTOME_SIGNALING_BY_EGFR	REACTOME_SIGNALING_BY_EGFR		37	0.239684	0.747874	0.869955	1	1	1586	tags=16%, list=20%, signal=20%
REACTOME_LYSOSOME_VESICLE_BIOGENESIS	REACTOME_LYSOSOME_VESICLE_BIOGENESIS		28	0.250567	0.747074	0.84139	1	1	2634	tags=36%, list=33%, signal=53%
REACTOME_RHO_GTPASES_ACTIVATE_PKNS	REACTOME_RHO_GTPASES_ACTIVATE_PKNS		35	0.23771	0.743785	0.851163	1	1	976	tags=14%, list=12%, signal=16%
REACTOME_METALLOPROTEASE_DUBS	REACTOME_METALLOPROTEASE_DUBS		17	0.28154	0.741965	0.814876	1	1	1161	tags=24%, list=15%, signal=27%
REACTOME_GLYOXYLATE_METABOLISM_AND_GLYCINE_DEGRADATION	REACTOME_GLYOXYLATE_METABOLISM_AND_GLYCINE_DEGRADATION		19	0.269648	0.729654	0.837539	1	1	1963	tags=32%, list=25%, signal=42%
REACTOME_PURINERGIC_SIGNALING_IN_LEISHMANIASIS_INFECTION	REACTOME_PURINERGIC_SIGNALING_IN_LEISHMANIASIS_INFECTION		15	0.287087	0.723722	0.829966	1	1	1383	tags=27%, list=17%, signal=32%
REACTOME_SIGNALING_BY_FGFR4	REACTOME_SIGNALING_BY_FGFR4		22	0.258846	0.721901	0.830941	1	1	1576	tags=18%, list=20%, signal=23%
REACTOME_RUNX1_INTERACTS_WITH_CO_FACTORS_WHOSE_PRECISE_EFFECT_ON_RUNX1_TARGETS_IS_NOT_KNOWN	REACTOME_RUNX1_INTERACTS_WITH_CO_FACTORS_WHOSE_PRECISE_EFFECT_ON_RUNX1_TARGETS_IS_NOT_KNOWN		31	0.238108	0.715433	0.872111	1	1	655	tags=10%, list=8%, signal=11%
REACTOME_REGULATION_OF_MECP2_EXPRESSION_AND_ACTIVITY	REACTOME_REGULATION_OF_MECP2_EXPRESSION_AND_ACTIVITY		23	0.251104	0.713505	0.845541	1	1	1534	tags=17%, list=19%, signal=21%
REACTOME_APOPTOTIC_EXECUTION_PHASE	REACTOME_APOPTOTIC_EXECUTION_PHASE		38	0.2266	0.713435	0.896652	1	1	1541	tags=18%, list=19%, signal=23%
REACTOME_SMAD2_SMAD3_SMAD4_HETEROTRIMER_REGULATES_TRANSCRIPTION	REACTOME_SMAD2_SMAD3_SMAD4_HETEROTRIMER_REGULATES_TRANSCRIPTION		24	0.245777	0.710425	0.868078	1	1	1116	tags=17%, list=14%, signal=19%
REACTOME_DNA_DAMAGE_RECOGNITION_IN_GG_NER	REACTOME_DNA_DAMAGE_RECOGNITION_IN_GG_NER		33	0.227644	0.705864	0.894574	1	1	953	tags=15%, list=12%, signal=17%
REACTOME_DEREGULATED_CDK5_TRIGGERS_MULTIPLE_NEURODEGENERATIVE_PATHWAYS_IN_ALZHEIMER_S_DISEASE_MODELS	REACTOME_DEREGULATED_CDK5_TRIGGERS_MULTIPLE_NEURODEGENERATIVE_PATHWAYS_IN_ALZHEIMER_S_DISEASE_MODELS		17	0.262784	0.702896	0.865815	1	1	3515	tags=71%, list=44%, signal=126%
REACTOME_APOPTOTIC_FACTOR_MEDIATED_RESPONSE	REACTOME_APOPTOTIC_FACTOR_MEDIATED_RESPONSE		18	0.259168	0.702594	0.872868	1	1	2341	tags=33%, list=29%, signal=47%
REACTOME_SIGNALING_BY_TGFB_FAMILY_MEMBERS	REACTOME_SIGNALING_BY_TGFB_FAMILY_MEMBERS		60	0.203907	0.696444	0.938307	1	1	1533	tags=20%, list=19%, signal=25%
REACTOME_DISORDERS_OF_TRANSMEMBRANE_TRANSPORTERS	REACTOME_DISORDERS_OF_TRANSMEMBRANE_TRANSPORTERS		105	0.186612	0.694406	0.972405	1	1	1069	tags=11%, list=13%, signal=13%
REACTOME_CD28_CO_STIMULATION	REACTOME_CD28_CO_STIMULATION		20	0.252707	0.692487	0.861852	1	1	2641	tags=40%, list=33%, signal=60%
REACTOME_PINK1_PRKN_MEDIATED_MITOPHAGY	REACTOME_PINK1_PRKN_MEDIATED_MITOPHAGY		17	0.262551	0.687066	0.876423	1	1	1886	tags=29%, list=24%, signal=38%
REACTOME_CONSTITUTIVE_SIGNALING_BY_LIGAND_RESPONSIVE_EGFR_CANCER_VARIANTS	REACTOME_CONSTITUTIVE_SIGNALING_BY_LIGAND_RESPONSIVE_EGFR_CANCER_VARIANTS		16	0.264886	0.684955	0.883987	1	1	1576	tags=25%, list=20%, signal=31%
REACTOME_DEPOSITION_OF_NEW_CENPA_CONTAINING_NUCLEOSOMES_AT_THE_CENTROMERE	REACTOME_DEPOSITION_OF_NEW_CENPA_CONTAINING_NUCLEOSOMES_AT_THE_CENTROMERE		22	0.242523	0.670846	0.933333	1	1	2256	tags=27%, list=28%, signal=38%
REACTOME_ACTIVATED_TAK1_MEDIATES_P38_MAPK_ACTIVATION	REACTOME_ACTIVATED_TAK1_MEDIATES_P38_MAPK_ACTIVATION		16	0.254326	0.669792	0.889752	1	1	2531	tags=38%, list=32%, signal=55%
REACTOME_REGULATION_OF_RUNX1_EXPRESSION_AND_ACTIVITY	REACTOME_REGULATION_OF_RUNX1_EXPRESSION_AND_ACTIVITY		15	0.267059	0.669341	0.871383	1	1	3451	tags=60%, list=43%, signal=106%
REACTOME_GENE_SILENCING_BY_RNA	REACTOME_GENE_SILENCING_BY_RNA		63	0.190171	0.661707	0.95754	1	1	2791	tags=32%, list=35%, signal=48%
REACTOME_SRP_DEPENDENT_COTRANSLATIONAL_PROTEIN_TARGETING_TO_MEMBRANE	REACTOME_SRP_DEPENDENT_COTRANSLATIONAL_PROTEIN_TARGETING_TO_MEMBRANE		96	0.175822	0.65393	0.974755	1	1	3227	tags=48%, list=41%, signal=80%
REACTOME_SUMOYLATION_OF_TRANSCRIPTION_COFACTORS	REACTOME_SUMOYLATION_OF_TRANSCRIPTION_COFACTORS		31	0.217457	0.653675	0.940092	1	1	1431	tags=16%, list=18%, signal=20%
REACTOME_TOLL_LIKE_RECEPTOR_CASCADES	REACTOME_TOLL_LIKE_RECEPTOR_CASCADES		91	0.176107	0.64326	0.984765	1	1	1295	tags=14%, list=16%, signal=17%
REACTOME_DOWNSTREAM_SIGNAL_TRANSDUCTION	REACTOME_DOWNSTREAM_SIGNAL_TRANSDUCTION		25	0.223266	0.638602	0.943307	1	1	3096	tags=48%, list=39%, signal=78%
REACTOME_FCERI_MEDIATED_MAPK_ACTIVATION	REACTOME_FCERI_MEDIATED_MAPK_ACTIVATION		21	0.234095	0.633314	0.918306	1	1	2462	tags=38%, list=31%, signal=55%
REACTOME_TRANSCRIPTIONAL_REGULATION_BY_VENTX	REACTOME_TRANSCRIPTIONAL_REGULATION_BY_VENTX		28	0.217135	0.631493	0.958064	1	1	2578	tags=32%, list=32%, signal=47%
REACTOME_INOSITOL_PHOSPHATE_METABOLISM	REACTOME_INOSITOL_PHOSPHATE_METABOLISM		31	0.208859	0.629959	0.942424	1	1	2103	tags=32%, list=26%, signal=44%
REACTOME_HCMV_LATE_EVENTS	REACTOME_HCMV_LATE_EVENTS		52	0.18832	0.628761	0.960526	1	1	3426	tags=52%, list=43%, signal=91%
REACTOME_NUCLEAR_ENVELOPE_BREAKDOWN	REACTOME_NUCLEAR_ENVELOPE_BREAKDOWN		50	0.185763	0.616057	0.967359	1	1	1960	tags=20%, list=25%, signal=26%
REACTOME_SIGNALING_BY_WNT_IN_CANCER	REACTOME_SIGNALING_BY_WNT_IN_CANCER		23	0.215955	0.606061	0.950845	1	1	765	tags=13%, list=10%, signal=14%
REACTOME_HDR_THROUGH_SINGLE_STRAND_ANNEALING_SSA	REACTOME_HDR_THROUGH_SINGLE_STRAND_ANNEALING_SSA		33	0.197419	0.605911	0.968391	1	1	600	tags=9%, list=8%, signal=10%
REACTOME_SIGNALING_BY_NOTCH2	REACTOME_SIGNALING_BY_NOTCH2		17	0.228349	0.603461	0.941463	1	1	953	tags=18%, list=12%, signal=20%
REACTOME_SEMA4D_IN_SEMAPHORIN_SIGNALING	REACTOME_SEMA4D_IN_SEMAPHORIN_SIGNALING		20	0.217158	0.602908	0.956857	1	1	2838	tags=45%, list=36%, signal=70%
REACTOME_DDX58_IFIH1_MEDIATED_INDUCTION_OF_INTERFERON_ALPHA_BETA	REACTOME_DDX58_IFIH1_MEDIATED_INDUCTION_OF_INTERFERON_ALPHA_BETA		54	0.180944	0.602821	0.978947	1	1	1660	tags=17%, list=21%, signal=21%
REACTOME_PROCESSING_OF_DNA_DOUBLE_STRAND_BREAK_ENDS	REACTOME_PROCESSING_OF_DNA_DOUBLE_STRAND_BREAK_ENDS		57	0.176589	0.5971	0.989986	1	1	2377	tags=26%, list=30%, signal=37%
REACTOME_RHOH_GTPASE_CYCLE	REACTOME_RHOH_GTPASE_CYCLE		29	0.199072	0.588638	0.978193	1	1	1063	tags=10%, list=13%, signal=12%
REACTOME_SIGNALING_BY_NTRKS	REACTOME_SIGNALING_BY_NTRKS		83	0.158773	0.578438	0.998645	1	1	2345	tags=28%, list=29%, signal=39%
REACTOME_TRANSLESION_SYNTHESIS_BY_POLH	REACTOME_TRANSLESION_SYNTHESIS_BY_POLH		17	0.219983	0.572553	0.967374	1	1	953	tags=12%, list=12%, signal=13%
REACTOME_JNK_C_JUN_KINASES_PHOSPHORYLATION_AND_ACTIVATION_MEDIATED_BY_ACTIVATED_HUMAN_TAK1	REACTOME_JNK_C_JUN_KINASES_PHOSPHORYLATION_AND_ACTIVATION_MEDIATED_BY_ACTIVATED_HUMAN_TAK1		15	0.222051	0.569009	0.96395	1	1	2299	tags=33%, list=29%, signal=47%
REACTOME_MITOCHONDRIAL_PROTEIN_IMPORT	REACTOME_MITOCHONDRIAL_PROTEIN_IMPORT		45	0.173051	0.567372	0.992424	1	1	2078	tags=27%, list=26%, signal=36%
REACTOME_SUMOYLATION_OF_CHROMATIN_ORGANIZATION_PROTEINS	REACTOME_SUMOYLATION_OF_CHROMATIN_ORGANIZATION_PROTEINS		51	0.167416	0.564479	0.988588	1	1	168	tags=4%, list=2%, signal=4%
REACTOME_RECYCLING_PATHWAY_OF_L1	REACTOME_RECYCLING_PATHWAY_OF_L1		32	0.183035	0.548784	0.98941	1	1	2273	tags=31%, list=29%, signal=44%
REACTOME_RND2_GTPASE_CYCLE	REACTOME_RND2_GTPASE_CYCLE		31	0.182534	0.541023	0.989045	1	1	1668	tags=16%, list=21%, signal=20%
REACTOME_DEADENYLATION_OF_MRNA	REACTOME_DEADENYLATION_OF_MRNA		25	0.184801	0.540972	0.992355	1	1	198	tags=4%, list=2%, signal=4%
REACTOME_RHO_GTPASES_ACTIVATE_CIT	REACTOME_RHO_GTPASES_ACTIVATE_CIT		17	0.197098	0.520026	0.970126	1	1	2606	tags=41%, list=33%, signal=61%
REACTOME_MICRORNA_MIRNA_BIOGENESIS	REACTOME_MICRORNA_MIRNA_BIOGENESIS		17	0.191963	0.518381	0.980296	1	1	2791	tags=35%, list=35%, signal=54%
REACTOME_PHOSPHORYLATION_OF_THE_APC_C	REACTOME_PHOSPHORYLATION_OF_THE_APC_C		16	0.196312	0.511989	0.991653	1	1	328	tags=6%, list=4%, signal=7%
REACTOME_SIGNAL_TRANSDUCTION_BY_L1	REACTOME_SIGNAL_TRANSDUCTION_BY_L1		18	0.193945	0.511404	0.987241	1	1	2294	tags=33%, list=29%, signal=47%
REACTOME_G2_M_DNA_DAMAGE_CHECKPOINT	REACTOME_G2_M_DNA_DAMAGE_CHECKPOINT		56	0.151795	0.506879	0.998547	1	1	424	tags=5%, list=5%, signal=6%
REACTOME_SIGNALING_BY_FGFR	REACTOME_SIGNALING_BY_FGFR		48	0.145913	0.484079	0.995608	1	1	1678	tags=15%, list=21%, signal=18%
REACTOME_APC_CDC20_MEDIATED_DEGRADATION_OF_NEK2A	REACTOME_APC_CDC20_MEDIATED_DEGRADATION_OF_NEK2A		21	0.176688	0.483145	0.99686	1	1	2578	tags=29%, list=32%, signal=42%
REACTOME_PYROPTOSIS	REACTOME_PYROPTOSIS		17	0.176478	0.464712	0.991667	1	1	169	tags=6%, list=2%, signal=6%
REACTOME_TAK1_ACTIVATES_NFKB_BY_PHOSPHORYLATION_AND_ACTIVATION_OF_IKKS_COMPLEX	REACTOME_TAK1_ACTIVATES_NFKB_BY_PHOSPHORYLATION_AND_ACTIVATION_OF_IKKS_COMPLEX		20	0.157298	0.425073	0.998476	1	1	2312	tags=25%, list=29%, signal=35%
REACTOME_INTERACTIONS_OF_VPR_WITH_HOST_CELLULAR_PROTEINS	REACTOME_INTERACTIONS_OF_VPR_WITH_HOST_CELLULAR_PROTEINS		36	0.112918	0.349657	1	0.999922	1	3378	tags=44%, list=42%, signal=77%

## Sheet: REACTOME_up_in_sgControl
NAME	GS<br> follow link to MSigDB	GS DETAILS	SIZE	ES	NES	NOM p-val	FDR q-val	FWER p-val	RANK AT MAX	LEADING EDGE
REACTOME_RESOLUTION_OF_ABASIC_SITES_AP_SITES	REACTOME_RESOLUTION_OF_ABASIC_SITES_AP_SITES	Details ...	31	-0.736431	-2.45341	0	0	0	189	tags=26%, list=2%, signal=26%
REACTOME_RNA_POLYMERASE_III_TRANSCRIPTION	REACTOME_RNA_POLYMERASE_III_TRANSCRIPTION	Details ...	32	-0.695506	-2.35404	0	0	0	1761	tags=63%, list=22%, signal=80%
REACTOME_RNA_POLYMERASE_I_TRANSCRIPTION_TERMINATION	REACTOME_RNA_POLYMERASE_I_TRANSCRIPTION_TERMINATION	Details ...	26	-0.712118	-2.28582	0	0.000527653	0.001	1445	tags=54%, list=18%, signal=66%
REACTOME_DUAL_INCISION_IN_TC_NER	REACTOME_DUAL_INCISION_IN_TC_NER	Details ...	54	-0.599397	-2.248	0	0.00113448	0.003	893	tags=35%, list=11%, signal=39%
REACTOME_DUAL_INCISION_IN_GG_NER	REACTOME_DUAL_INCISION_IN_GG_NER	Details ...	36	-0.636612	-2.24601	0	0.000907587	0.003	893	tags=42%, list=11%, signal=47%
REACTOME_RNA_POLYMERASE_III_TRANSCRIPTION_INITIATION_FROM_TYPE_1_PROMOTER	REACTOME_RNA_POLYMERASE_III_TRANSCRIPTION_INITIATION_FROM_TYPE_1_PROMOTER	Details ...	22	-0.723159	-2.20544	0	0.00124357	0.005	680	tags=41%, list=9%, signal=45%
REACTOME_RNA_POLYMERASE_I_TRANSCRIPTION_INITIATION	REACTOME_RNA_POLYMERASE_I_TRANSCRIPTION_INITIATION	Details ...	40	-0.615229	-2.2016	0	0.00106592	0.005	2119	tags=63%, list=27%, signal=85%
REACTOME_RNA_POLYMERASE_III_TRANSCRIPTION_INITIATION_FROM_TYPE_3_PROMOTER	REACTOME_RNA_POLYMERASE_III_TRANSCRIPTION_INITIATION_FROM_TYPE_3_PROMOTER	Details ...	20	-0.729799	-2.18656	0	0.000932681	0.005	639	tags=45%, list=8%, signal=49%
REACTOME_TRANSCRIPTION_COUPLED_NUCLEOTIDE_EXCISION_REPAIR_TC_NER	REACTOME_TRANSCRIPTION_COUPLED_NUCLEOTIDE_EXCISION_REPAIR_TC_NER	Details ...	67	-0.552088	-2.18648	0	0.000829049	0.005	893	tags=28%, list=11%, signal=32%
REACTOME_HIV_TRANSCRIPTION_INITIATION	REACTOME_HIV_TRANSCRIPTION_INITIATION	Details ...	31	-0.636394	-2.16236	0	0.0016351	0.011	2168	tags=68%, list=27%, signal=93%
REACTOME_RNA_POLYMERASE_III_TRANSCRIPTION_TERMINATION	REACTOME_RNA_POLYMERASE_III_TRANSCRIPTION_TERMINATION	Details ...	16	-0.753193	-2.14986	0	0.00162908	0.012	1286	tags=69%, list=16%, signal=82%
REACTOME_PCNA_DEPENDENT_LONG_PATCH_BASE_EXCISION_REPAIR	REACTOME_PCNA_DEPENDENT_LONG_PATCH_BASE_EXCISION_REPAIR	Details ...	20	-0.71498	-2.14871	0	0.00149332	0.012	182	tags=30%, list=2%, signal=31%
REACTOME_ATTENUATION_PHASE	REACTOME_ATTENUATION_PHASE	Details ...	19	-0.73031	-2.13926	0	0.00162247	0.014	1111	tags=63%, list=14%, signal=73%
REACTOME_DNA_REPLICATION	REACTOME_DNA_REPLICATION	Details ...	108	-0.496485	-2.12016	0	0.00245893	0.023	1981	tags=46%, list=25%, signal=61%
REACTOME_POLYMERASE_SWITCHING_ON_THE_C_STRAND_OF_THE_TELOMERE	REACTOME_POLYMERASE_SWITCHING_ON_THE_C_STRAND_OF_THE_TELOMERE	Details ...	23	-0.671501	-2.11403	0	0.002295	0.023	1783	tags=61%, list=22%, signal=78%
REACTOME_BASE_EXCISION_REPAIR	REACTOME_BASE_EXCISION_REPAIR	Details ...	40	-0.596846	-2.09021	0	0.00281346	0.03	189	tags=20%, list=2%, signal=20%
REACTOME_TRANSCRIPTION_OF_THE_HIV_GENOME	REACTOME_TRANSCRIPTION_OF_THE_HIV_GENOME	Details ...	53	-0.553618	-2.08486	0	0.00273069	0.031	2344	tags=60%, list=29%, signal=85%
REACTOME_HSF1_DEPENDENT_TRANSACTIVATION	REACTOME_HSF1_DEPENDENT_TRANSACTIVATION	Details ...	26	-0.640213	-2.07282	0	0.00299044	0.036	1111	tags=50%, list=14%, signal=58%
REACTOME_HSF1_ACTIVATION	REACTOME_HSF1_ACTIVATION	Details ...	22	-0.686517	-2.07072	0	0.00291245	0.037	1111	tags=50%, list=14%, signal=58%
REACTOME_RESOLUTION_OF_AP_SITES_VIA_THE_MULTIPLE_NUCLEOTIDE_PATCH_REPLACEMENT_PATHWAY	REACTOME_RESOLUTION_OF_AP_SITES_VIA_THE_MULTIPLE_NUCLEOTIDE_PATCH_REPLACEMENT_PATHWAY	Details ...	23	-0.657972	-2.06398	0	0.00300917	0.04	182	tags=26%, list=2%, signal=27%
REACTOME_TRANSLESION_SYNTHESIS_BY_Y_FAMILY_DNA_POLYMERASES_BYPASSES_LESIONS_ON_DNA_TEMPLATE	REACTOME_TRANSLESION_SYNTHESIS_BY_Y_FAMILY_DNA_POLYMERASES_BYPASSES_LESIONS_ON_DNA_TEMPLATE		32	-0.62246	-2.06283	0	0.00286588	0.04	782	tags=34%, list=10%, signal=38%
REACTOME_DNA_DAMAGE_BYPASS	REACTOME_DNA_DAMAGE_BYPASS		40	-0.580652	-2.05854	0	0.00300727	0.044	807	tags=35%, list=10%, signal=39%
REACTOME_HIV_TRANSCRIPTION_ELONGATION	REACTOME_HIV_TRANSCRIPTION_ELONGATION		35	-0.589885	-2.02043	0	0.004555	0.069	2043	tags=51%, list=26%, signal=69%
REACTOME_DNA_STRAND_ELONGATION	REACTOME_DNA_STRAND_ELONGATION		30	-0.603668	-1.9975	0	0.0060314	0.091	1977	tags=53%, list=25%, signal=71%
REACTOME_GAP_FILLING_DNA_REPAIR_SYNTHESIS_AND_LIGATION_IN_GG_NER	REACTOME_GAP_FILLING_DNA_REPAIR_SYNTHESIS_AND_LIGATION_IN_GG_NER		23	-0.646711	-1.99685	0	0.00585207	0.092	745	tags=35%, list=9%, signal=38%
REACTOME_S_PHASE	REACTOME_S_PHASE		138	-0.43698	-1.9792	0	0.00712701	0.117	2672	tags=59%, list=34%, signal=87%
REACTOME_CROSS_PRESENTATION_OF_SOLUBLE_EXOGENOUS_ANTIGENS_ENDOSOMES	REACTOME_CROSS_PRESENTATION_OF_SOLUBLE_EXOGENOUS_ANTIGENS_ENDOSOMES		42	-0.539759	-1.9576	0	0.00881437	0.149	2308	tags=62%, list=29%, signal=87%
REACTOME_DNA_REPLICATION_PRE_INITIATION	REACTOME_DNA_REPLICATION_PRE_INITIATION		72	-0.486387	-1.94693	0	0.00992778	0.168	2308	tags=57%, list=29%, signal=79%
REACTOME_EXTENSION_OF_TELOMERES	REACTOME_EXTENSION_OF_TELOMERES		45	-0.535365	-1.94256	0	0.0103623	0.181	1974	tags=53%, list=25%, signal=71%
REACTOME_MRNA_CAPPING	REACTOME_MRNA_CAPPING		22	-0.641507	-1.94032	0	0.0104144	0.186	2043	tags=64%, list=26%, signal=85%
REACTOME_LAGGING_STRAND_SYNTHESIS	REACTOME_LAGGING_STRAND_SYNTHESIS		20	-0.644837	-1.93732	0	0.0104572	0.191	1974	tags=60%, list=25%, signal=80%
REACTOME_PERK_REGULATES_GENE_EXPRESSION	REACTOME_PERK_REGULATES_GENE_EXPRESSION		25	-0.622238	-1.93663	0.00296736	0.0102193	0.192	2248	tags=68%, list=28%, signal=94%
REACTOME_INTRAFLAGELLAR_TRANSPORT	REACTOME_INTRAFLAGELLAR_TRANSPORT		37	-0.554498	-1.93617	0	0.009955	0.193	2275	tags=57%, list=29%, signal=79%
REACTOME_TERMINATION_OF_TRANSLESION_DNA_SYNTHESIS	REACTOME_TERMINATION_OF_TRANSLESION_DNA_SYNTHESIS		27	-0.603845	-1.93235	0	0.0103323	0.204	745	tags=33%, list=9%, signal=37%
REACTOME_METABOLISM_OF_POLYAMINES	REACTOME_METABOLISM_OF_POLYAMINES		48	-0.52775	-1.9296	0	0.0103761	0.21	2308	tags=56%, list=29%, signal=79%
REACTOME_FORMATION_OF_RNA_POL_II_ELONGATION_COMPLEX	REACTOME_FORMATION_OF_RNA_POL_II_ELONGATION_COMPLEX		49	-0.513765	-1.9171	0	0.0113145	0.231	1906	tags=41%, list=24%, signal=53%
REACTOME_CELLULAR_RESPONSE_TO_HEAT_STRESS	REACTOME_CELLULAR_RESPONSE_TO_HEAT_STRESS		86	-0.466856	-1.90918	0	0.0119897	0.25	1111	tags=30%, list=14%, signal=35%
REACTOME_FORMATION_OF_THE_EARLY_ELONGATION_COMPLEX	REACTOME_FORMATION_OF_THE_EARLY_ELONGATION_COMPLEX		26	-0.614804	-1.90435	0	0.0121825	0.259	2043	tags=54%, list=26%, signal=72%
REACTOME_PROCESSIVE_SYNTHESIS_ON_THE_LAGGING_STRAND	REACTOME_PROCESSIVE_SYNTHESIS_ON_THE_LAGGING_STRAND		15	-0.691812	-1.89919	0	0.0125683	0.27	1287	tags=53%, list=16%, signal=63%
REACTOME_COOPERATION_OF_PREFOLDIN_AND_TRIC_CCT_IN_ACTIN_AND_TUBULIN_FOLDING	REACTOME_COOPERATION_OF_PREFOLDIN_AND_TRIC_CCT_IN_ACTIN_AND_TUBULIN_FOLDING		21	-0.627371	-1.89149	0	0.0133336	0.291	1061	tags=62%, list=13%, signal=71%
REACTOME_NOTCH_HLH_TRANSCRIPTION_PATHWAY	REACTOME_NOTCH_HLH_TRANSCRIPTION_PATHWAY		18	-0.648739	-1.88886	0.00265957	0.0134391	0.299	1437	tags=50%, list=18%, signal=61%
REACTOME_RECOGNITION_OF_DNA_DAMAGE_BY_PCNA_CONTAINING_REPLICATION_COMPLEX	REACTOME_RECOGNITION_OF_DNA_DAMAGE_BY_PCNA_CONTAINING_REPLICATION_COMPLEX		27	-0.587506	-1.88852	0.00578035	0.0131191	0.299	807	tags=37%, list=10%, signal=41%
REACTOME_TELOMERE_C_STRAND_LAGGING_STRAND_SYNTHESIS	REACTOME_TELOMERE_C_STRAND_LAGGING_STRAND_SYNTHESIS		31	-0.564778	-1.87478	0	0.0145225	0.336	1783	tags=48%, list=22%, signal=62%
REACTOME_TP53_REGULATES_TRANSCRIPTION_OF_DNA_REPAIR_GENES	REACTOME_TP53_REGULATES_TRANSCRIPTION_OF_DNA_REPAIR_GENES		51	-0.506894	-1.8743	0	0.0142592	0.337	2177	tags=47%, list=27%, signal=64%
REACTOME_REGULATION_OF_MRNA_STABILITY_BY_PROTEINS_THAT_BIND_AU_RICH_ELEMENTS	REACTOME_REGULATION_OF_MRNA_STABILITY_BY_PROTEINS_THAT_BIND_AU_RICH_ELEMENTS		79	-0.463087	-1.87263	0	0.0141467	0.34	2308	tags=58%, list=29%, signal=81%
REACTOME_DECTIN_1_MEDIATED_NONCANONICAL_NF_KB_SIGNALING	REACTOME_DECTIN_1_MEDIATED_NONCANONICAL_NF_KB_SIGNALING		55	-0.489119	-1.86801	0	0.0147864	0.359	1391	tags=40%, list=17%, signal=48%
REACTOME_HEDGEHOG_ON_STATE	REACTOME_HEDGEHOG_ON_STATE		63	-0.471287	-1.83018	0	0.0212544	0.483	2308	tags=56%, list=29%, signal=78%
REACTOME_GLOBAL_GENOME_NUCLEOTIDE_EXCISION_REPAIR_GG_NER	REACTOME_GLOBAL_GENOME_NUCLEOTIDE_EXCISION_REPAIR_GG_NER		73	-0.460545	-1.82555	0.00689655	0.0218137	0.503	1783	tags=42%, list=22%, signal=54%
REACTOME_NUCLEOTIDE_EXCISION_REPAIR	REACTOME_NUCLEOTIDE_EXCISION_REPAIR		93	-0.434594	-1.82509	0	0.0214304	0.504	1974	tags=42%, list=25%, signal=55%
REACTOME_ATF4_ACTIVATES_GENES_IN_RESPONSE_TO_ENDOPLASMIC_RETICULUM_STRESS	REACTOME_ATF4_ACTIVATES_GENES_IN_RESPONSE_TO_ENDOPLASMIC_RETICULUM_STRESS		20	-0.609082	-1.82295	0.00526316	0.0215738	0.511	2248	tags=70%, list=28%, signal=97%
REACTOME_TCR_SIGNALING	REACTOME_TCR_SIGNALING		85	-0.445939	-1.81663	0	0.0222424	0.532	1405	tags=35%, list=18%, signal=42%
REACTOME_ACTIVATION_OF_THE_PRE_REPLICATIVE_COMPLEX	REACTOME_ACTIVATION_OF_THE_PRE_REPLICATIVE_COMPLEX		27	-0.550496	-1.80698	0.00304878	0.023882	0.568	2091	tags=56%, list=26%, signal=75%
REACTOME_ORC1_REMOVAL_FROM_CHROMATIN	REACTOME_ORC1_REMOVAL_FROM_CHROMATIN		63	-0.459071	-1.792	0	0.0267724	0.618	2772	tags=68%, list=35%, signal=104%
REACTOME_RESPIRATORY_ELECTRON_TRANSPORT	REACTOME_RESPIRATORY_ELECTRON_TRANSPORT		83	-0.429777	-1.7851	0	0.0279777	0.639	1722	tags=37%, list=22%, signal=47%
REACTOME_CYTOSOLIC_TRNA_AMINOACYLATION	REACTOME_CYTOSOLIC_TRNA_AMINOACYLATION		23	-0.572546	-1.78196	0.00837989	0.0283655	0.656	1738	tags=43%, list=22%, signal=55%
REACTOME_KSRP_KHSRP_BINDS_AND_DESTABILIZES_MRNA	REACTOME_KSRP_KHSRP_BINDS_AND_DESTABILIZES_MRNA		16	-0.630038	-1.78039	0.0144928	0.028264	0.659	2104	tags=75%, list=26%, signal=102%
REACTOME_DEGRADATION_OF_GLI1_BY_THE_PROTEASOME	REACTOME_DEGRADATION_OF_GLI1_BY_THE_PROTEASOME		54	-0.467357	-1.77759	0	0.0281946	0.665	2308	tags=56%, list=29%, signal=78%
REACTOME_REGULATION_OF_HSF1_MEDIATED_HEAT_SHOCK_RESPONSE	REACTOME_REGULATION_OF_HSF1_MEDIATED_HEAT_SHOCK_RESPONSE		70	-0.446916	-1.77563	0	0.02846	0.675	1083	tags=27%, list=14%, signal=31%
REACTOME_AUF1_HNRNP_D0_BINDS_AND_DESTABILIZES_MRNA	REACTOME_AUF1_HNRNP_D0_BINDS_AND_DESTABILIZES_MRNA		50	-0.482762	-1.77122	0.0122699	0.0288355	0.688	2308	tags=60%, list=29%, signal=84%
REACTOME_NEGATIVE_REGULATION_OF_NOTCH4_SIGNALING	REACTOME_NEGATIVE_REGULATION_OF_NOTCH4_SIGNALING		50	-0.473737	-1.77	0	0.0285805	0.691	2308	tags=58%, list=29%, signal=81%
REACTOME_ASSOCIATION_OF_TRIC_CCT_WITH_TARGET_PROTEINS_DURING_BIOSYNTHESIS	REACTOME_ASSOCIATION_OF_TRIC_CCT_WITH_TARGET_PROTEINS_DURING_BIOSYNTHESIS		27	-0.546828	-1.76223	0.00564972	0.030005	0.711	1185	tags=48%, list=15%, signal=56%
REACTOME_SWITCHING_OF_ORIGINS_TO_A_POST_REPLICATIVE_STATE	REACTOME_SWITCHING_OF_ORIGINS_TO_A_POST_REPLICATIVE_STATE		78	-0.426721	-1.74479	0	0.0339232	0.759	2890	tags=67%, list=36%, signal=104%
REACTOME_FORMATION_OF_TC_NER_PRE_INCISION_COMPLEX	REACTOME_FORMATION_OF_TC_NER_PRE_INCISION_COMPLEX		43	-0.480753	-1.74418	0.003003	0.0334983	0.759	893	tags=26%, list=11%, signal=29%
REACTOME_PROCESSIVE_SYNTHESIS_ON_THE_C_STRAND_OF_THE_TELOMERE	REACTOME_PROCESSIVE_SYNTHESIS_ON_THE_C_STRAND_OF_THE_TELOMERE		17	-0.601762	-1.73655	0.00849858	0.0351602	0.787	182	tags=24%, list=2%, signal=24%
REACTOME_ASSEMBLY_OF_THE_PRE_REPLICATIVE_COMPLEX	REACTOME_ASSEMBLY_OF_THE_PRE_REPLICATIVE_COMPLEX		59	-0.453717	-1.73123	0	0.036097	0.803	2772	tags=68%, list=35%, signal=103%
REACTOME_NUCLEOBASE_BIOSYNTHESIS	REACTOME_NUCLEOBASE_BIOSYNTHESIS		15	-0.620554	-1.72441	0.00804289	0.0379075	0.824	142	tags=20%, list=2%, signal=20%
REACTOME_DEGRADATION_OF_DVL	REACTOME_DEGRADATION_OF_DVL		51	-0.450362	-1.71649	0.00299401	0.0401649	0.845	2308	tags=61%, list=29%, signal=85%
REACTOME_MRNA_DECAY_BY_3_TO_5_EXORIBONUCLEASE	REACTOME_MRNA_DECAY_BY_3_TO_5_EXORIBONUCLEASE		16	-0.596248	-1.70861	0.0183727	0.0424668	0.865	2104	tags=56%, list=26%, signal=76%
REACTOME_DNA_REPAIR	REACTOME_DNA_REPAIR		228	-0.36103	-1.69983	0	0.0446368	0.881	1992	tags=36%, list=25%, signal=47%
REACTOME_COMPLEX_I_BIOGENESIS	REACTOME_COMPLEX_I_BIOGENESIS		48	-0.455542	-1.68766	0.00600601	0.0483914	0.901	2350	tags=50%, list=29%, signal=70%
REACTOME_SIGNALING_BY_NOTCH4	REACTOME_SIGNALING_BY_NOTCH4		64	-0.42476	-1.68184	0	0.0498941	0.909	1981	tags=48%, list=25%, signal=64%
REACTOME_REGULATION_OF_RUNX3_EXPRESSION_AND_ACTIVITY	REACTOME_REGULATION_OF_RUNX3_EXPRESSION_AND_ACTIVITY		50	-0.460012	-1.67812	0.0096463	0.0504687	0.914	2308	tags=58%, list=29%, signal=81%
REACTOME_TNFR2_NON_CANONICAL_NF_KB_PATHWAY	REACTOME_TNFR2_NON_CANONICAL_NF_KB_PATHWAY		61	-0.421806	-1.67147	0.00347222	0.052834	0.929	2308	tags=52%, list=29%, signal=73%
REACTOME_TRNA_MODIFICATION_IN_THE_NUCLEUS_AND_CYTOSOL	REACTOME_TRNA_MODIFICATION_IN_THE_NUCLEUS_AND_CYTOSOL		35	-0.47348	-1.64163	0.0171429	0.0660326	0.963	2629	tags=57%, list=33%, signal=85%
REACTOME_HIV_INFECTION	REACTOME_HIV_INFECTION		192	-0.348454	-1.63848	0	0.0665241	0.966	2344	tags=43%, list=29%, signal=59%
REACTOME_CILIUM_ASSEMBLY	REACTOME_CILIUM_ASSEMBLY		140	-0.371806	-1.63838	0	0.0657081	0.966	1373	tags=29%, list=17%, signal=35%
REACTOME_ANTIGEN_PROCESSING_UBIQUITINATION_PROTEASOME_DEGRADATION	REACTOME_ANTIGEN_PROCESSING_UBIQUITINATION_PROTEASOME_DEGRADATION		203	-0.351288	-1.63562	0	0.0662496	0.968	1534	tags=32%, list=19%, signal=38%
REACTOME_HDR_THROUGH_HOMOLOGOUS_RECOMBINATION_HRR	REACTOME_HDR_THROUGH_HOMOLOGOUS_RECOMBINATION_HRR		56	-0.437504	-1.63223	0.00332226	0.0669311	0.971	1783	tags=41%, list=22%, signal=53%
REACTOME_DEGRADATION_OF_AXIN	REACTOME_DEGRADATION_OF_AXIN		49	-0.431229	-1.60988	0.0058997	0.0774167	0.986	2308	tags=57%, list=29%, signal=80%
REACTOME_RHOBTB2_GTPASE_CYCLE	REACTOME_RHOBTB2_GTPASE_CYCLE		23	-0.523487	-1.6085	0.0236842	0.0773225	0.987	1739	tags=43%, list=22%, signal=55%
REACTOME_REGULATION_OF_HMOX1_EXPRESSION_AND_ACTIVITY	REACTOME_REGULATION_OF_HMOX1_EXPRESSION_AND_ACTIVITY		57	-0.418904	-1.60157	0.0106007	0.0802271	0.987	2369	tags=56%, list=30%, signal=79%
REACTOME_TRNA_PROCESSING	REACTOME_TRNA_PROCESSING		97	-0.377979	-1.58463	0.00395257	0.089458	0.993	1681	tags=29%, list=21%, signal=36%
REACTOME_TRANSCRIPTIONAL_ACTIVATION_OF_MITOCHONDRIAL_BIOGENESIS	REACTOME_TRANSCRIPTIONAL_ACTIVATION_OF_MITOCHONDRIAL_BIOGENESIS		43	-0.439898	-1.5829	0.022293	0.0892832	0.993	1564	tags=37%, list=20%, signal=46%
REACTOME_FORMATION_OF_TUBULIN_FOLDING_INTERMEDIATES_BY_CCT_TRIC	REACTOME_FORMATION_OF_TUBULIN_FOLDING_INTERMEDIATES_BY_CCT_TRIC		15	-0.567742	-1.58273	0.0399002	0.0883644	0.993	862	tags=53%, list=11%, signal=60%
REACTOME_ORGANELLE_BIOGENESIS_AND_MAINTENANCE	REACTOME_ORGANELLE_BIOGENESIS_AND_MAINTENANCE		209	-0.33574	-1.57132	0	0.0941605	0.996	1373	tags=27%, list=17%, signal=32%
REACTOME_FCERI_MEDIATED_NF_KB_ACTIVATION	REACTOME_FCERI_MEDIATED_NF_KB_ACTIVATION		65	-0.404112	-1.56197	0.0107143	0.0995219	0.999	2308	tags=52%, list=29%, signal=73%
REACTOME_REGULATION_OF_RUNX2_EXPRESSION_AND_ACTIVITY	REACTOME_REGULATION_OF_RUNX2_EXPRESSION_AND_ACTIVITY		56	-0.409089	-1.55769	0.00333333	0.101149	0.999	1391	tags=38%, list=17%, signal=45%
REACTOME_NEGATIVE_EPIGENETIC_REGULATION_OF_RRNA_EXPRESSION	REACTOME_NEGATIVE_EPIGENETIC_REGULATION_OF_RRNA_EXPRESSION		50	-0.417436	-1.55332	0.0201342	0.102952	0.999	1449	tags=34%, list=18%, signal=41%
REACTOME_STABILIZATION_OF_P53	REACTOME_STABILIZATION_OF_P53		49	-0.423679	-1.55289	0.019802	0.102049	0.999	2308	tags=55%, list=29%, signal=77%
REACTOME_PROCESSING_OF_INTRONLESS_PRE_MRNAS	REACTOME_PROCESSING_OF_INTRONLESS_PRE_MRNAS		19	-0.526381	-1.55182	0.0441558	0.101639	0.999	2680	tags=68%, list=34%, signal=103%
REACTOME_BILE_ACID_AND_BILE_SALT_METABOLISM	REACTOME_BILE_ACID_AND_BILE_SALT_METABOLISM		22	-0.50298	-1.55095	0.0460358	0.100977	0.999	122	tags=18%, list=2%, signal=18%
REACTOME_RNA_POLYMERASE_I_PROMOTER_ESCAPE	REACTOME_RNA_POLYMERASE_I_PROMOTER_ESCAPE		33	-0.45855	-1.54859	0.0208955	0.101412	0.999	1479	tags=45%, list=19%, signal=56%
REACTOME_TRISTETRAPROLIN_TTP_ZFP36_BINDS_AND_DESTABILIZES_MRNA	REACTOME_TRISTETRAPROLIN_TTP_ZFP36_BINDS_AND_DESTABILIZES_MRNA		16	-0.536519	-1.54855	0.0349127	0.100369	0.999	2104	tags=56%, list=26%, signal=76%
REACTOME_DEFECTIVE_CFTR_CAUSES_CYSTIC_FIBROSIS	REACTOME_DEFECTIVE_CFTR_CAUSES_CYSTIC_FIBROSIS		54	-0.402739	-1.53917	0.0033557	0.105511	0.999	2308	tags=52%, list=29%, signal=73%
REACTOME_RESPIRATORY_ELECTRON_TRANSPORT_ATP_SYNTHESIS_BY_CHEMIOSMOTIC_COUPLING_AND_HEAT_PRODUCTION_BY_UNCOUPLING_PROTEINS	REACTOME_RESPIRATORY_ELECTRON_TRANSPORT_ATP_SYNTHESIS_BY_CHEMIOSMOTIC_COUPLING_AND_HEAT_PRODUCTION_BY_UNCOUPLING_PROTEINS		94	-0.368769	-1.53771	0	0.105708	0.999	1722	tags=34%, list=22%, signal=43%
REACTOME_RNA_POLYMERASE_I_TRANSCRIPTION	REACTOME_RNA_POLYMERASE_I_TRANSCRIPTION		51	-0.410803	-1.53171	0.00970874	0.108573	0.999	1644	tags=41%, list=21%, signal=52%
REACTOME_REGULATION_OF_LIPID_METABOLISM_BY_PPARALPHA	REACTOME_REGULATION_OF_LIPID_METABOLISM_BY_PPARALPHA		84	-0.373007	-1.53033	0.00395257	0.108397	0.999	1560	tags=27%, list=20%, signal=34%
REACTOME_CYTOSOLIC_SENSORS_OF_PATHOGEN_ASSOCIATED_DNA	REACTOME_CYTOSOLIC_SENSORS_OF_PATHOGEN_ASSOCIATED_DNA		49	-0.409209	-1.52203	0.0212121	0.112752	1	1637	tags=37%, list=21%, signal=46%
REACTOME_CYCLIN_A_CDK2_ASSOCIATED_EVENTS_AT_S_PHASE_ENTRY	REACTOME_CYCLIN_A_CDK2_ASSOCIATED_EVENTS_AT_S_PHASE_ENTRY		72	-0.37433	-1.51966	0.0107914	0.113103	1	2308	tags=51%, list=29%, signal=72%
REACTOME_MRNA_SPLICING	REACTOME_MRNA_SPLICING		172	-0.33148	-1.5172	0.00961539	0.113868	1	2620	tags=46%, list=33%, signal=67%
REACTOME_HEDGEHOG_OFF_STATE	REACTOME_HEDGEHOG_OFF_STATE		84	-0.367271	-1.51237	0.00371747	0.116452	1	1391	tags=33%, list=17%, signal=40%
REACTOME_COSTIMULATION_BY_THE_CD28_FAMILY	REACTOME_COSTIMULATION_BY_THE_CD28_FAMILY		38	-0.433362	-1.49677	0.0235294	0.126515	1	161	tags=16%, list=2%, signal=16%
REACTOME_TELOMERE_MAINTENANCE	REACTOME_TELOMERE_MAINTENANCE		60	-0.379959	-1.49285	0.0306748	0.128577	1	1974	tags=43%, list=25%, signal=57%
REACTOME_G1_S_DNA_DAMAGE_CHECKPOINTS	REACTOME_G1_S_DNA_DAMAGE_CHECKPOINTS		54	-0.394095	-1.48952	0.0185759	0.129948	1	2308	tags=56%, list=29%, signal=78%
REACTOME_APC_C_CDH1_MEDIATED_DEGRADATION_OF_CDC20_AND_OTHER_APC_C_CDH1_TARGETED_PROTEINS_IN_LATE_MITOSIS_EARLY_G1	REACTOME_APC_C_CDH1_MEDIATED_DEGRADATION_OF_CDC20_AND_OTHER_APC_C_CDH1_TARGETED_PROTEINS_IN_LATE_MITOSIS_EARLY_G1		63	-0.372972	-1.48759	0.0231023	0.130266	1	2308	tags=46%, list=29%, signal=64%
REACTOME_APC_C_MEDIATED_DEGRADATION_OF_CELL_CYCLE_PROTEINS	REACTOME_APC_C_MEDIATED_DEGRADATION_OF_CELL_CYCLE_PROTEINS		75	-0.364539	-1.48662	0.0167224	0.129664	1	2308	tags=48%, list=29%, signal=67%
REACTOME_SCF_SKP2_MEDIATED_DEGRADATION_OF_P27_P21	REACTOME_SCF_SKP2_MEDIATED_DEGRADATION_OF_P27_P21		54	-0.398163	-1.48564	0.015674	0.129222	1	2308	tags=56%, list=29%, signal=78%
REACTOME_DEGRADATION_OF_BETA_CATENIN_BY_THE_DESTRUCTION_COMPLEX	REACTOME_DEGRADATION_OF_BETA_CATENIN_BY_THE_DESTRUCTION_COMPLEX		69	-0.375744	-1.48508	0.020979	0.128533	1	1391	tags=35%, list=17%, signal=42%
REACTOME_ASYMMETRIC_LOCALIZATION_OF_PCP_PROTEINS	REACTOME_ASYMMETRIC_LOCALIZATION_OF_PCP_PROTEINS		52	-0.400255	-1.48054	0.0337423	0.1312	1	2308	tags=54%, list=29%, signal=75%
REACTOME_MITOTIC_G1_PHASE_AND_G1_S_TRANSITION	REACTOME_MITOTIC_G1_PHASE_AND_G1_S_TRANSITION		120	-0.342026	-1.47643	0.0042735	0.133364	1	2108	tags=44%, list=26%, signal=59%
REACTOME_HSP90_CHAPERONE_CYCLE_FOR_STEROID_HORMONE_RECEPTORS_SHR	REACTOME_HSP90_CHAPERONE_CYCLE_FOR_STEROID_HORMONE_RECEPTORS_SHR		39	-0.422679	-1.47597	0.0341615	0.13261	1	1111	tags=33%, list=14%, signal=39%
REACTOME_UPTAKE_AND_ACTIONS_OF_BACTERIAL_TOXINS	REACTOME_UPTAKE_AND_ACTIONS_OF_BACTERIAL_TOXINS		17	-0.515954	-1.47559	0.046832	0.131592	1	1413	tags=47%, list=18%, signal=57%
REACTOME_SIGNALING_BY_HEDGEHOG	REACTOME_SIGNALING_BY_HEDGEHOG		103	-0.343214	-1.47277	0.00775194	0.132952	1	1297	tags=30%, list=16%, signal=35%
REACTOME_RNA_POLYMERASE_II_TRANSCRIPTION_TERMINATION	REACTOME_RNA_POLYMERASE_II_TRANSCRIPTION_TERMINATION		56	-0.376365	-1.47235	0.0177936	0.131972	1	2680	tags=55%, list=34%, signal=83%
REACTOME_SYNTHESIS_OF_BILE_ACIDS_AND_BILE_SALTS	REACTOME_SYNTHESIS_OF_BILE_ACIDS_AND_BILE_SALTS		20	-0.479987	-1.46225	0.0517711	0.138945	1	86	tags=15%, list=1%, signal=15%
REACTOME_CHROMOSOME_MAINTENANCE	REACTOME_CHROMOSOME_MAINTENANCE		76	-0.35491	-1.44607	0.0169492	0.151615	1	1974	tags=39%, list=25%, signal=52%
REACTOME_RRNA_MODIFICATION_IN_THE_NUCLEUS_AND_CYTOSOL	REACTOME_RRNA_MODIFICATION_IN_THE_NUCLEUS_AND_CYTOSOL		58	-0.377009	-1.44588	0.0302013	0.150422	1	1812	tags=31%, list=23%, signal=40%
REACTOME_UNFOLDED_PROTEIN_RESPONSE_UPR	REACTOME_UNFOLDED_PROTEIN_RESPONSE_UPR		67	-0.36659	-1.44327	0.016835	0.151539	1	1952	tags=37%, list=25%, signal=49%
REACTOME_CELLULAR_RESPONSE_TO_CHEMICAL_STRESS	REACTOME_CELLULAR_RESPONSE_TO_CHEMICAL_STRESS		125	-0.328491	-1.44135	0.00917431	0.151901	1	1736	tags=34%, list=22%, signal=43%
REACTOME_TRNA_PROCESSING_IN_THE_NUCLEUS	REACTOME_TRNA_PROCESSING_IN_THE_NUCLEUS		55	-0.379286	-1.44044	0.0353698	0.151262	1	1681	tags=27%, list=21%, signal=34%
REACTOME_G1_S_SPECIFIC_TRANSCRIPTION	REACTOME_G1_S_SPECIFIC_TRANSCRIPTION		20	-0.480385	-1.43729	0.0662983	0.152722	1	2616	tags=65%, list=33%, signal=97%
REACTOME_HEDGEHOG_LIGAND_BIOGENESIS	REACTOME_HEDGEHOG_LIGAND_BIOGENESIS		54	-0.37997	-1.42629	0.04	0.161581	1	2316	tags=52%, list=29%, signal=73%
REACTOME_INTERLEUKIN_1_SIGNALING	REACTOME_INTERLEUKIN_1_SIGNALING		77	-0.351544	-1.42493	0.0468227	0.161559	1	2308	tags=48%, list=29%, signal=67%
REACTOME_CYTOPROTECTION_BY_HMOX1	REACTOME_CYTOPROTECTION_BY_HMOX1		102	-0.334142	-1.42222	0.00766283	0.162639	1	2308	tags=45%, list=29%, signal=63%
REACTOME_HIV_LIFE_CYCLE	REACTOME_HIV_LIFE_CYCLE		123	-0.330453	-1.41679	0.0221239	0.166355	1	2344	tags=39%, list=29%, signal=54%
REACTOME_RNA_POLYMERASE_II_TRANSCRIBES_SNRNA_GENES	REACTOME_RNA_POLYMERASE_II_TRANSCRIBES_SNRNA_GENES		59	-0.37208	-1.40738	0.0231788	0.173865	1	1963	tags=32%, list=25%, signal=42%
REACTOME_MAPK6_MAPK4_SIGNALING	REACTOME_MAPK6_MAPK4_SIGNALING		74	-0.349659	-1.40654	0.0170648	0.173477	1	1391	tags=34%, list=17%, signal=41%
REACTOME_FORMATION_OF_INCISION_COMPLEX_IN_GG_NER	REACTOME_FORMATION_OF_INCISION_COMPLEX_IN_GG_NER		37	-0.410184	-1.40494	0.0648968	0.173899	1	1441	tags=41%, list=18%, signal=49%
REACTOME_DOWNSTREAM_SIGNALING_EVENTS_OF_B_CELL_RECEPTOR_BCR	REACTOME_DOWNSTREAM_SIGNALING_EVENTS_OF_B_CELL_RECEPTOR_BCR		71	-0.347565	-1.40298	0.0220588	0.174344	1	2308	tags=46%, list=29%, signal=65%
REACTOME_METABOLISM_OF_NUCLEOTIDES	REACTOME_METABOLISM_OF_NUCLEOTIDES		72	-0.355681	-1.39912	0.0439189	0.176914	1	268	tags=11%, list=3%, signal=11%
REACTOME_REGULATION_OF_PTEN_STABILITY_AND_ACTIVITY	REACTOME_REGULATION_OF_PTEN_STABILITY_AND_ACTIVITY		61	-0.359897	-1.39587	0.0620915	0.17897	1	2369	tags=52%, list=30%, signal=74%
REACTOME_TELOMERE_EXTENSION_BY_TELOMERASE	REACTOME_TELOMERE_EXTENSION_BY_TELOMERASE		18	-0.479532	-1.39563	0.100737	0.177805	1	1955	tags=56%, list=25%, signal=73%
REACTOME_UCH_PROTEINASES	REACTOME_UCH_PROTEINASES		73	-0.339883	-1.39193	0.0275862	0.180544	1	2308	tags=48%, list=29%, signal=67%
REACTOME_RHOBTB_GTPASE_CYCLE	REACTOME_RHOBTB_GTPASE_CYCLE		33	-0.405412	-1.38894	0.0746269	0.182182	1	1739	tags=33%, list=22%, signal=42%
REACTOME_SEPARATION_OF_SISTER_CHROMATIDS	REACTOME_SEPARATION_OF_SISTER_CHROMATIDS		154	-0.305282	-1.38612	0.010101	0.184013	1	2308	tags=39%, list=29%, signal=54%
REACTOME_UB_SPECIFIC_PROCESSING_PROTEASES	REACTOME_UB_SPECIFIC_PROCESSING_PROTEASES		132	-0.311311	-1.38362	0.00877193	0.185335	1	2308	tags=44%, list=29%, signal=61%
REACTOME_TRANSCRIPTIONAL_REGULATION_BY_RUNX2	REACTOME_TRANSCRIPTIONAL_REGULATION_BY_RUNX2		85	-0.33605	-1.37903	0.0613718	0.188682	1	2308	tags=49%, list=29%, signal=69%
REACTOME_EPIGENETIC_REGULATION_OF_GENE_EXPRESSION	REACTOME_EPIGENETIC_REGULATION_OF_GENE_EXPRESSION		78	-0.33249	-1.3663	0.0398551	0.201092	1	2167	tags=46%, list=27%, signal=63%
REACTOME_DNA_DOUBLE_STRAND_BREAK_REPAIR	REACTOME_DNA_DOUBLE_STRAND_BREAK_REPAIR		114	-0.311894	-1.36584	0.029661	0.200177	1	1287	tags=24%, list=16%, signal=28%
REACTOME_HIV_ELONGATION_ARREST_AND_RECOVERY	REACTOME_HIV_ELONGATION_ARREST_AND_RECOVERY		27	-0.421554	-1.35734	0.112637	0.2083	1	2966	tags=67%, list=37%, signal=106%
REACTOME_ANCHORING_OF_THE_BASAL_BODY_TO_THE_PLASMA_MEMBRANE	REACTOME_ANCHORING_OF_THE_BASAL_BODY_TO_THE_PLASMA_MEMBRANE		75	-0.337159	-1.35666	0.0376712	0.207553	1	1373	tags=28%, list=17%, signal=34%
REACTOME_CLASS_I_MHC_MEDIATED_ANTIGEN_PROCESSING_PRESENTATION	REACTOME_CLASS_I_MHC_MEDIATED_ANTIGEN_PROCESSING_PRESENTATION		244	-0.283769	-1.35539	0	0.207571	1	1297	tags=25%, list=16%, signal=29%
REACTOME_PROCESSING_OF_CAPPED_INTRON_CONTAINING_PRE_MRNA	REACTOME_PROCESSING_OF_CAPPED_INTRON_CONTAINING_PRE_MRNA		222	-0.284677	-1.34491	0.0232558	0.218611	1	2620	tags=42%, list=33%, signal=61%
REACTOME_HOMOLOGY_DIRECTED_REPAIR	REACTOME_HOMOLOGY_DIRECTED_REPAIR		90	-0.323523	-1.34212	0.0437956	0.220528	1	1783	tags=32%, list=22%, signal=41%
REACTOME_HOST_INTERACTIONS_OF_HIV_FACTORS	REACTOME_HOST_INTERACTIONS_OF_HIV_FACTORS		116	-0.307733	-1.32917	0.0220264	0.235115	1	2308	tags=41%, list=29%, signal=57%
REACTOME_RHOBTB1_GTPASE_CYCLE	REACTOME_RHOBTB1_GTPASE_CYCLE		21	-0.442403	-1.32674	0.127226	0.236583	1	2798	tags=62%, list=35%, signal=95%
REACTOME_THE_ROLE_OF_GTSE1_IN_G2_M_PROGRESSION_AFTER_G2_CHECKPOINT	REACTOME_THE_ROLE_OF_GTSE1_IN_G2_M_PROGRESSION_AFTER_G2_CHECKPOINT		62	-0.337886	-1.31386	0.0758123	0.252135	1	1391	tags=37%, list=17%, signal=45%
REACTOME_TRANSCRIPTIONAL_REGULATION_BY_THE_AP_2_TFAP2_FAMILY_OF_TRANSCRIPTION_FACTORS	REACTOME_TRANSCRIPTIONAL_REGULATION_BY_THE_AP_2_TFAP2_FAMILY_OF_TRANSCRIPTION_FACTORS		20	-0.4354	-1.29777	0.15736	0.271789	1	1511	tags=50%, list=19%, signal=62%
REACTOME_HEME_SIGNALING	REACTOME_HEME_SIGNALING		30	-0.395851	-1.29724	0.134454	0.270725	1	2288	tags=47%, list=29%, signal=65%
REACTOME_TRANSLESION_SYNTHESIS_BY_POLK	REACTOME_TRANSLESION_SYNTHESIS_BY_POLK		15	-0.465444	-1.29676	0.143258	0.269493	1	745	tags=20%, list=9%, signal=22%
REACTOME_RUNX1_REGULATES_TRANSCRIPTION_OF_GENES_INVOLVED_IN_DIFFERENTIATION_OF_HSCS	REACTOME_RUNX1_REGULATES_TRANSCRIPTION_OF_GENES_INVOLVED_IN_DIFFERENTIATION_OF_HSCS		65	-0.331371	-1.29531	0.0863309	0.27009	1	1391	tags=35%, list=17%, signal=43%
REACTOME_MITOTIC_G2_G2_M_PHASES	REACTOME_MITOTIC_G2_G2_M_PHASES		168	-0.281012	-1.28939	0.0166667	0.276639	1	1391	tags=28%, list=17%, signal=33%
REACTOME_INTERLEUKIN_1_FAMILY_SIGNALING	REACTOME_INTERLEUKIN_1_FAMILY_SIGNALING		93	-0.305629	-1.28938	0.0756972	0.274871	1	2308	tags=44%, list=29%, signal=61%
REACTOME_REGULATION_OF_RAS_BY_GAPS	REACTOME_REGULATION_OF_RAS_BY_GAPS		59	-0.333223	-1.2878	0.0928571	0.27526	1	2308	tags=49%, list=29%, signal=69%
REACTOME_GAMMA_CARBOXYLATION_HYPUSINE_FORMATION_AND_ARYLSULFATASE_ACTIVATION	REACTOME_GAMMA_CARBOXYLATION_HYPUSINE_FORMATION_AND_ARYLSULFATASE_ACTIVATION		21	-0.419268	-1.28743	0.144444	0.273928	1	55	tags=19%, list=1%, signal=19%
REACTOME_SELECTIVE_AUTOPHAGY	REACTOME_SELECTIVE_AUTOPHAGY		55	-0.342251	-1.27826	0.0980392	0.285688	1	917	tags=20%, list=12%, signal=22%
REACTOME_TRANSCRIPTIONAL_REGULATION_BY_RUNX3	REACTOME_TRANSCRIPTIONAL_REGULATION_BY_RUNX3		75	-0.314448	-1.2672	0.0912162	0.300408	1	1981	tags=43%, list=25%, signal=56%
REACTOME_NEDDYLATION	REACTOME_NEDDYLATION		155	-0.280653	-1.26712	0.0476191	0.298629	1	1988	tags=37%, list=25%, signal=49%
REACTOME_PROTEIN_FOLDING	REACTOME_PROTEIN_FOLDING		61	-0.335146	-1.26592	0.103448	0.298311	1	1496	tags=43%, list=19%, signal=52%
REACTOME_MYOGENESIS	REACTOME_MYOGENESIS		15	-0.443962	-1.25727	0.172043	0.309474	1	1291	tags=47%, list=16%, signal=56%
REACTOME_TRANSCRIPTIONAL_REGULATION_OF_WHITE_ADIPOCYTE_DIFFERENTIATION	REACTOME_TRANSCRIPTIONAL_REGULATION_OF_WHITE_ADIPOCYTE_DIFFERENTIATION		61	-0.31785	-1.25556	0.0841751	0.310316	1	2746	tags=46%, list=34%, signal=70%
REACTOME_REGULATION_OF_EXPRESSION_OF_SLITS_AND_ROBOS	REACTOME_REGULATION_OF_EXPRESSION_OF_SLITS_AND_ROBOS		141	-0.284257	-1.2555	0.039604	0.308509	1	2312	tags=38%, list=29%, signal=52%
REACTOME_MTORC1_MEDIATED_SIGNALLING	REACTOME_MTORC1_MEDIATED_SIGNALLING		19	-0.422359	-1.24094	0.190601	0.330534	1	399	tags=16%, list=5%, signal=17%
REACTOME_TRANSCRIPTIONAL_REGULATION_BY_TP53	REACTOME_TRANSCRIPTIONAL_REGULATION_BY_TP53		270	-0.257185	-1.24029	0.027972	0.329709	1	1924	tags=31%, list=24%, signal=40%
REACTOME_SIGNALING_BY_NOTCH1_PEST_DOMAIN_MUTANTS_IN_CANCER	REACTOME_SIGNALING_BY_NOTCH1_PEST_DOMAIN_MUTANTS_IN_CANCER		35	-0.362199	-1.22986	0.167173	0.34494	1	1511	tags=34%, list=19%, signal=42%
REACTOME_CITRIC_ACID_CYCLE_TCA_CYCLE	REACTOME_CITRIC_ACID_CYCLE_TCA_CYCLE		22	-0.39362	-1.22948	0.1875	0.343458	1	247	tags=14%, list=3%, signal=14%
REACTOME_ABORTIVE_ELONGATION_OF_HIV_1_TRANSCRIPT_IN_THE_ABSENCE_OF_TAT	REACTOME_ABORTIVE_ELONGATION_OF_HIV_1_TRANSCRIPT_IN_THE_ABSENCE_OF_TAT		18	-0.411916	-1.22526	0.208763	0.348542	1	1906	tags=33%, list=24%, signal=44%
REACTOME_CELLULAR_RESPONSES_TO_EXTERNAL_STIMULI	REACTOME_CELLULAR_RESPONSES_TO_EXTERNAL_STIMULI		469	-0.240225	-1.22478	0.012987	0.347198	1	1618	tags=26%, list=20%, signal=31%
REACTOME_RESOLUTION_OF_D_LOOP_STRUCTURES	REACTOME_RESOLUTION_OF_D_LOOP_STRUCTURES		27	-0.374126	-1.22376	0.196581	0.347064	1	1680	tags=44%, list=21%, signal=56%
REACTOME_TP53_REGULATES_METABOLIC_GENES	REACTOME_TP53_REGULATES_METABOLIC_GENES		64	-0.314641	-1.2214	0.10101	0.348717	1	1614	tags=28%, list=20%, signal=35%
REACTOME_DOWNREGULATION_OF_SMAD2_3_SMAD4_TRANSCRIPTIONAL_ACTIVITY	REACTOME_DOWNREGULATION_OF_SMAD2_3_SMAD4_TRANSCRIPTIONAL_ACTIVITY		18	-0.419765	-1.21547	0.210938	0.356637	1	1404	tags=33%, list=18%, signal=40%
REACTOME_E2F_MEDIATED_REGULATION_OF_DNA_REPLICATION	REACTOME_E2F_MEDIATED_REGULATION_OF_DNA_REPLICATION		17	-0.426051	-1.21376	0.229111	0.35751	1	1687	tags=53%, list=21%, signal=67%
REACTOME_HDACS_DEACETYLATE_HISTONES	REACTOME_HDACS_DEACETYLATE_HISTONES		35	-0.357736	-1.21305	0.209375	0.356653	1	2167	tags=49%, list=27%, signal=66%
REACTOME_G0_AND_EARLY_G1	REACTOME_G0_AND_EARLY_G1		18	-0.425587	-1.21242	0.207792	0.355579	1	2616	tags=56%, list=33%, signal=83%
REACTOME_RESOLUTION_OF_D_LOOP_STRUCTURES_THROUGH_SYNTHESIS_DEPENDENT_STRAND_ANNEALING_SDSA	REACTOME_RESOLUTION_OF_D_LOOP_STRUCTURES_THROUGH_SYNTHESIS_DEPENDENT_STRAND_ANNEALING_SDSA		22	-0.399178	-1.21134	0.216	0.355299	1	1680	tags=50%, list=21%, signal=63%
REACTOME_ABC_TRANSPORTER_DISORDERS	REACTOME_ABC_TRANSPORTER_DISORDERS		59	-0.313523	-1.20782	0.131944	0.359221	1	1391	tags=32%, list=17%, signal=39%
REACTOME_CELL_CYCLE_MITOTIC	REACTOME_CELL_CYCLE_MITOTIC		429	-0.24132	-1.20724	0.0238095	0.358166	1	2323	tags=38%, list=29%, signal=50%
REACTOME_DETOXIFICATION_OF_REACTIVE_OXYGEN_SPECIES	REACTOME_DETOXIFICATION_OF_REACTIVE_OXYGEN_SPECIES		24	-0.394114	-1.20532	0.213873	0.359611	1	1567	tags=42%, list=20%, signal=52%
REACTOME_NOTCH1_INTRACELLULAR_DOMAIN_REGULATES_TRANSCRIPTION	REACTOME_NOTCH1_INTRACELLULAR_DOMAIN_REGULATES_TRANSCRIPTION		31	-0.364139	-1.20271	0.187861	0.362093	1	1511	tags=42%, list=19%, signal=52%
REACTOME_CELL_CYCLE_CHECKPOINTS	REACTOME_CELL_CYCLE_CHECKPOINTS		217	-0.259926	-1.19603	0.0508475	0.371347	1	2308	tags=38%, list=29%, signal=52%
REACTOME_RORA_ACTIVATES_GENE_EXPRESSION	REACTOME_RORA_ACTIVATES_GENE_EXPRESSION		16	-0.438145	-1.19144	0.22365	0.377532	1	2740	tags=63%, list=34%, signal=95%
REACTOME_G2_M_CHECKPOINTS	REACTOME_G2_M_CHECKPOINTS		120	-0.267637	-1.17773	0.136	0.400492	1	2308	tags=41%, list=29%, signal=57%
REACTOME_METABOLISM_OF_FAT_SOLUBLE_VITAMINS	REACTOME_METABOLISM_OF_FAT_SOLUBLE_VITAMINS		18	-0.403481	-1.16943	0.252033	0.414525	1	814	tags=28%, list=10%, signal=31%
REACTOME_REGULATION_OF_PLK1_ACTIVITY_AT_G2_M_TRANSITION	REACTOME_REGULATION_OF_PLK1_ACTIVITY_AT_G2_M_TRANSITION		78	-0.286106	-1.16376	0.156364	0.423417	1	1373	tags=27%, list=17%, signal=32%
REACTOME_METABOLISM_OF_STEROIDS	REACTOME_METABOLISM_OF_STEROIDS		89	-0.28022	-1.16167	0.161157	0.424914	1	1144	tags=21%, list=14%, signal=25%
REACTOME_SIGNALING_BY_NOTCH	REACTOME_SIGNALING_BY_NOTCH		130	-0.262573	-1.15717	0.128906	0.431518	1	1437	tags=28%, list=18%, signal=34%
REACTOME_PCP_CE_PATHWAY	REACTOME_PCP_CE_PATHWAY		71	-0.286489	-1.14769	0.154717	0.448414	1	2403	tags=48%, list=30%, signal=68%
REACTOME_RRNA_PROCESSING	REACTOME_RRNA_PROCESSING		185	-0.244758	-1.14353	0.154286	0.454969	1	1862	tags=28%, list=23%, signal=36%
REACTOME_EUKARYOTIC_TRANSLATION_INITIATION	REACTOME_EUKARYOTIC_TRANSLATION_INITIATION		108	-0.267608	-1.14234	0.191235	0.454981	1	1499	tags=20%, list=19%, signal=25%
REACTOME_CHROMATIN_MODIFYING_ENZYMES	REACTOME_CHROMATIN_MODIFYING_ENZYMES		178	-0.251151	-1.14016	0.172249	0.45714	1	2402	tags=42%, list=30%, signal=58%
REACTOME_CLEC7A_DECTIN_1_SIGNALING	REACTOME_CLEC7A_DECTIN_1_SIGNALING		82	-0.278599	-1.13832	0.235294	0.458299	1	2308	tags=45%, list=29%, signal=63%
REACTOME_MITOTIC_SPINDLE_CHECKPOINT	REACTOME_MITOTIC_SPINDLE_CHECKPOINT		92	-0.277767	-1.13409	0.19697	0.46509	1	1786	tags=27%, list=22%, signal=35%
REACTOME_ACTIVATION_OF_BH3_ONLY_PROTEINS	REACTOME_ACTIVATION_OF_BH3_ONLY_PROTEINS		19	-0.38296	-1.12818	0.28169	0.475473	1	2086	tags=37%, list=26%, signal=50%
REACTOME_AURKA_ACTIVATION_BY_TPX2	REACTOME_AURKA_ACTIVATION_BY_TPX2		64	-0.288786	-1.12816	0.251572	0.473045	1	1373	tags=25%, list=17%, signal=30%
REACTOME_INTERCONVERSION_OF_NUCLEOTIDE_DI_AND_TRIPHOSPHATES	REACTOME_INTERCONVERSION_OF_NUCLEOTIDE_DI_AND_TRIPHOSPHATES		23	-0.364697	-1.12789	0.285714	0.471237	1	747	tags=26%, list=9%, signal=29%
REACTOME_MITOCHONDRIAL_BIOGENESIS	REACTOME_MITOCHONDRIAL_BIOGENESIS		69	-0.280238	-1.1264	0.233813	0.472271	1	1798	tags=30%, list=23%, signal=39%
REACTOME_DEUBIQUITINATION	REACTOME_DEUBIQUITINATION		185	-0.243606	-1.125	0.162162	0.472976	1	2308	tags=39%, list=29%, signal=54%
REACTOME_HATS_ACETYLATE_HISTONES	REACTOME_HATS_ACETYLATE_HISTONES		70	-0.282243	-1.12116	0.229391	0.478729	1	2268	tags=40%, list=28%, signal=55%
REACTOME_CALNEXIN_CALRETICULIN_CYCLE	REACTOME_CALNEXIN_CALRETICULIN_CYCLE		23	-0.357319	-1.11682	0.294461	0.485893	1	365	tags=17%, list=5%, signal=18%
REACTOME_ADAPTIVE_IMMUNE_SYSTEM	REACTOME_ADAPTIVE_IMMUNE_SYSTEM		423	-0.220615	-1.11407	0.0941176	0.489539	1	1297	tags=21%, list=16%, signal=24%
REACTOME_SENSORY_PROCESSING_OF_SOUND	REACTOME_SENSORY_PROCESSING_OF_SOUND		31	-0.337851	-1.11332	0.325905	0.488748	1	192	tags=16%, list=2%, signal=16%
REACTOME_CELLULAR_RESPONSE_TO_HYPOXIA	REACTOME_CELLULAR_RESPONSE_TO_HYPOXIA		57	-0.289188	-1.10303	0.264026	0.50866	1	2308	tags=58%, list=29%, signal=81%
REACTOME_MITOTIC_PROMETAPHASE	REACTOME_MITOTIC_PROMETAPHASE		168	-0.244385	-1.10146	0.225806	0.50975	1	1575	tags=25%, list=20%, signal=31%
REACTOME_BUTYRATE_RESPONSE_FACTOR_1_BRF1_BINDS_AND_DESTABILIZES_MRNA	REACTOME_BUTYRATE_RESPONSE_FACTOR_1_BRF1_BINDS_AND_DESTABILIZES_MRNA		17	-0.384019	-1.09104	0.331671	0.530702	1	2104	tags=47%, list=26%, signal=64%
REACTOME_MHC_CLASS_II_ANTIGEN_PRESENTATION	REACTOME_MHC_CLASS_II_ANTIGEN_PRESENTATION		93	-0.261626	-1.09005	0.246154	0.530293	1	474	tags=12%, list=6%, signal=12%
REACTOME_REGULATION_OF_TP53_ACTIVITY_THROUGH_PHOSPHORYLATION	REACTOME_REGULATION_OF_TP53_ACTIVITY_THROUGH_PHOSPHORYLATION		65	-0.28009	-1.0893	0.295302	0.529399	1	2425	tags=40%, list=30%, signal=57%
REACTOME_RESOLUTION_OF_SISTER_CHROMATID_COHESION	REACTOME_RESOLUTION_OF_SISTER_CHROMATID_COHESION		98	-0.256113	-1.08693	0.254032	0.532403	1	1388	tags=22%, list=17%, signal=27%
REACTOME_TCF_DEPENDENT_SIGNALING_IN_RESPONSE_TO_WNT	REACTOME_TCF_DEPENDENT_SIGNALING_IN_RESPONSE_TO_WNT		120	-0.254028	-1.08642	0.285714	0.530878	1	2438	tags=49%, list=31%, signal=70%
REACTOME_ESTROGEN_DEPENDENT_GENE_EXPRESSION	REACTOME_ESTROGEN_DEPENDENT_GENE_EXPRESSION		71	-0.273487	-1.08358	0.286232	0.535031	1	1564	tags=30%, list=20%, signal=36%
REACTOME_REGULATION_OF_TP53_ACTIVITY	REACTOME_REGULATION_OF_TP53_ACTIVITY		119	-0.250354	-1.08033	0.273973	0.539467	1	2458	tags=42%, list=31%, signal=60%
REACTOME_SELENOAMINO_ACID_METABOLISM	REACTOME_SELENOAMINO_ACID_METABOLISM		99	-0.252875	-1.08024	0.24359	0.53719	1	1548	tags=22%, list=19%, signal=27%
REACTOME_NUCLEOBASE_CATABOLISM	REACTOME_NUCLEOBASE_CATABOLISM		20	-0.352288	-1.07808	0.367521	0.53959	1	3	tags=5%, list=0%, signal=5%
REACTOME_THE_CITRIC_ACID_TCA_CYCLE_AND_RESPIRATORY_ELECTRON_TRANSPORT	REACTOME_THE_CITRIC_ACID_TCA_CYCLE_AND_RESPIRATORY_ELECTRON_TRANSPORT		135	-0.237198	-1.06425	0.294872	0.569268	1	1368	tags=21%, list=17%, signal=25%
REACTOME_REGULATION_OF_CHOLESTEROL_BIOSYNTHESIS_BY_SREBP_SREBF	REACTOME_REGULATION_OF_CHOLESTEROL_BIOSYNTHESIS_BY_SREBP_SREBF		49	-0.291055	-1.0636	0.353896	0.568266	1	2796	tags=55%, list=35%, signal=84%
REACTOME_DEACTIVATION_OF_THE_BETA_CATENIN_TRANSACTIVATING_COMPLEX	REACTOME_DEACTIVATION_OF_THE_BETA_CATENIN_TRANSACTIVATING_COMPLEX		26	-0.327177	-1.05996	0.357955	0.574229	1	681	tags=15%, list=9%, signal=17%
REACTOME_TRANSCRIPTIONAL_ACTIVITY_OF_SMAD2_SMAD3_SMAD4_HETEROTRIMER	REACTOME_TRANSCRIPTIONAL_ACTIVITY_OF_SMAD2_SMAD3_SMAD4_HETEROTRIMER		34	-0.308511	-1.05916	0.383721	0.573492	1	1404	tags=26%, list=18%, signal=32%
REACTOME_PROCESSING_OF_CAPPED_INTRONLESS_PRE_MRNA	REACTOME_PROCESSING_OF_CAPPED_INTRONLESS_PRE_MRNA		24	-0.340042	-1.05888	0.360882	0.571472	1	2680	tags=58%, list=34%, signal=88%
REACTOME_SENSORY_PERCEPTION	REACTOME_SENSORY_PERCEPTION		63	-0.26511	-1.05776	0.353135	0.571517	1	873	tags=21%, list=11%, signal=23%
REACTOME_ACTIVATION_OF_THE_MRNA_UPON_BINDING_OF_THE_CAP_BINDING_COMPLEX_AND_EIFS_AND_SUBSEQUENT_BINDING_TO_43S	REACTOME_ACTIVATION_OF_THE_MRNA_UPON_BINDING_OF_THE_CAP_BINDING_COMPLEX_AND_EIFS_AND_SUBSEQUENT_BINDING_TO_43S		56	-0.277201	-1.05351	0.378472	0.579034	1	1008	tags=16%, list=13%, signal=18%
REACTOME_GOLGI_ASSOCIATED_VESICLE_BIOGENESIS	REACTOME_GOLGI_ASSOCIATED_VESICLE_BIOGENESIS		49	-0.287527	-1.05243	0.336667	0.578925	1	825	tags=12%, list=10%, signal=14%
REACTOME_CARGO_TRAFFICKING_TO_THE_PERICILIARY_MEMBRANE	REACTOME_CARGO_TRAFFICKING_TO_THE_PERICILIARY_MEMBRANE		30	-0.32066	-1.05036	0.368571	0.581396	1	862	tags=27%, list=11%, signal=30%
REACTOME_RHO_GTPASES_ACTIVATE_ROCKS	REACTOME_RHO_GTPASES_ACTIVATE_ROCKS		18	-0.355382	-1.04859	0.367021	0.583207	1	1025	tags=28%, list=13%, signal=32%
REACTOME_FGFR2_ALTERNATIVE_SPLICING	REACTOME_FGFR2_ALTERNATIVE_SPLICING		19	-0.354231	-1.04858	0.378446	0.580627	1	2015	tags=32%, list=25%, signal=42%
REACTOME_MITOTIC_METAPHASE_AND_ANAPHASE	REACTOME_MITOTIC_METAPHASE_AND_ANAPHASE		198	-0.220633	-1.04855	0.285714	0.578127	1	2308	tags=36%, list=29%, signal=49%
REACTOME_TRANSPORT_OF_MATURE_TRANSCRIPT_TO_CYTOPLASM	REACTOME_TRANSPORT_OF_MATURE_TRANSCRIPT_TO_CYTOPLASM		76	-0.260888	-1.04325	0.379928	0.588933	1	2680	tags=42%, list=34%, signal=63%
REACTOME_TRANSCRIPTIONAL_REGULATION_BY_RUNX1	REACTOME_TRANSCRIPTIONAL_REGULATION_BY_RUNX1		134	-0.236852	-1.04294	0.350427	0.587062	1	2369	tags=44%, list=30%, signal=62%
REACTOME_MTOR_SIGNALLING	REACTOME_MTOR_SIGNALLING		31	-0.308238	-1.0413	0.405099	0.588641	1	399	tags=10%, list=5%, signal=10%
REACTOME_SIGNALING_BY_NOTCH3	REACTOME_SIGNALING_BY_NOTCH3		26	-0.320512	-1.04068	0.393678	0.587543	1	1511	tags=35%, list=19%, signal=43%
REACTOME_RUNX2_REGULATES_BONE_DEVELOPMENT	REACTOME_RUNX2_REGULATES_BONE_DEVELOPMENT		17	-0.359909	-1.03571	0.394022	0.596873	1	573	tags=18%, list=7%, signal=19%
REACTOME_SIGNALING_BY_ROBO_RECEPTORS	REACTOME_SIGNALING_BY_ROBO_RECEPTORS		176	-0.221363	-1.0275	0.372881	0.614709	1	2342	tags=35%, list=29%, signal=48%
REACTOME_INTERACTIONS_OF_REV_WITH_HOST_CELLULAR_PROTEINS	REACTOME_INTERACTIONS_OF_REV_WITH_HOST_CELLULAR_PROTEINS		37	-0.297661	-1.02283	0.4	0.62359	1	2292	tags=32%, list=29%, signal=45%
REACTOME_ACTIVATION_OF_GENE_EXPRESSION_BY_SREBF_SREBP	REACTOME_ACTIVATION_OF_GENE_EXPRESSION_BY_SREBF_SREBP		39	-0.288073	-1.01344	0.427184	0.644219	1	2293	tags=44%, list=29%, signal=61%
REACTOME_INSERTION_OF_TAIL_ANCHORED_PROTEINS_INTO_THE_ENDOPLASMIC_RETICULUM_MEMBRANE	REACTOME_INSERTION_OF_TAIL_ANCHORED_PROTEINS_INTO_THE_ENDOPLASMIC_RETICULUM_MEMBRANE		16	-0.362104	-1.01086	0.434316	0.647679	1	737	tags=19%, list=9%, signal=21%
REACTOME_SULFUR_AMINO_ACID_METABOLISM	REACTOME_SULFUR_AMINO_ACID_METABOLISM		19	-0.341405	-1.00159	0.443804	0.669328	1	480	tags=21%, list=6%, signal=22%
REACTOME_ZBP1_DAI_MEDIATED_INDUCTION_OF_TYPE_I_IFNS	REACTOME_ZBP1_DAI_MEDIATED_INDUCTION_OF_TYPE_I_IFNS		16	-0.366581	-1.00135	0.444444	0.667059	1	2728	tags=44%, list=34%, signal=66%
REACTOME_NGF_STIMULATED_TRANSCRIPTION	REACTOME_NGF_STIMULATED_TRANSCRIPTION		20	-0.3301	-0.995465	0.457672	0.679757	1	1564	tags=40%, list=20%, signal=50%
REACTOME_TRANSLATION	REACTOME_TRANSLATION		265	-0.206412	-0.993376	0.477419	0.682489	1	1738	tags=21%, list=22%, signal=26%
REACTOME_PTEN_REGULATION	REACTOME_PTEN_REGULATION		116	-0.229532	-0.990698	0.491667	0.686518	1	2108	tags=37%, list=26%, signal=50%
REACTOME_DEADENYLATION_DEPENDENT_MRNA_DECAY	REACTOME_DEADENYLATION_DEPENDENT_MRNA_DECAY		55	-0.26225	-0.990033	0.458861	0.685294	1	2104	tags=31%, list=26%, signal=42%
REACTOME_SIGNALING_BY_THE_B_CELL_RECEPTOR_BCR	REACTOME_SIGNALING_BY_THE_B_CELL_RECEPTOR_BCR		86	-0.238642	-0.989812	0.491039	0.682955	1	1405	tags=27%, list=18%, signal=32%
REACTOME_VIRAL_MESSENGER_RNA_SYNTHESIS	REACTOME_VIRAL_MESSENGER_RNA_SYNTHESIS		39	-0.275171	-0.985788	0.479751	0.690295	1	1906	tags=26%, list=24%, signal=34%
REACTOME_SNRNP_ASSEMBLY	REACTOME_SNRNP_ASSEMBLY		48	-0.27535	-0.982263	0.472892	0.696245	1	1888	tags=31%, list=24%, signal=41%
REACTOME_CYTOKINE_SIGNALING_IN_IMMUNE_SYSTEM	REACTOME_CYTOKINE_SIGNALING_IN_IMMUNE_SYSTEM		368	-0.195782	-0.9818	0.549451	0.694638	1	999	tags=16%, list=13%, signal=18%
REACTOME_SIGNALING_BY_FGFR_IN_DISEASE	REACTOME_SIGNALING_BY_FGFR_IN_DISEASE		38	-0.26649	-0.9678	0.515235	0.729023	1	2072	tags=32%, list=26%, signal=42%
REACTOME_TRNA_AMINOACYLATION	REACTOME_TRNA_AMINOACYLATION		41	-0.269989	-0.962186	0.537791	0.741394	1	1548	tags=24%, list=19%, signal=30%
REACTOME_NEUROTRANSMITTER_RELEASE_CYCLE	REACTOME_NEUROTRANSMITTER_RELEASE_CYCLE		16	-0.34961	-0.959404	0.483029	0.745789	1	503	tags=25%, list=6%, signal=27%
REACTOME_REGULATION_OF_BETA_CELL_DEVELOPMENT	REACTOME_REGULATION_OF_BETA_CELL_DEVELOPMENT		17	-0.326508	-0.958426	0.498645	0.745307	1	1511	tags=47%, list=19%, signal=58%
REACTOME_TRIGLYCERIDE_METABOLISM	REACTOME_TRIGLYCERIDE_METABOLISM		20	-0.325386	-0.957625	0.49866	0.744286	1	917	tags=25%, list=12%, signal=28%
REACTOME_INFLUENZA_INFECTION	REACTOME_INFLUENZA_INFECTION		136	-0.216381	-0.954063	0.571429	0.750599	1	1547	tags=18%, list=19%, signal=22%
REACTOME_SIGNALING_BY_NOTCH1	REACTOME_SIGNALING_BY_NOTCH1		45	-0.261292	-0.951107	0.510769	0.755844	1	1511	tags=31%, list=19%, signal=38%
REACTOME_ABC_FAMILY_PROTEINS_MEDIATED_TRANSPORT	REACTOME_ABC_FAMILY_PROTEINS_MEDIATED_TRANSPORT		75	-0.236858	-0.950947	0.566176	0.753274	1	1391	tags=29%, list=17%, signal=35%
REACTOME_IRE1ALPHA_ACTIVATES_CHAPERONES	REACTOME_IRE1ALPHA_ACTIVATES_CHAPERONES		38	-0.269803	-0.945118	0.538462	0.766177	1	354	tags=8%, list=4%, signal=8%
REACTOME_N_GLYCAN_TRIMMING_IN_THE_ER_AND_CALNEXIN_CALRETICULIN_CYCLE	REACTOME_N_GLYCAN_TRIMMING_IN_THE_ER_AND_CALNEXIN_CALRETICULIN_CYCLE		32	-0.287306	-0.944309	0.564669	0.765037	1	1211	tags=22%, list=15%, signal=26%
REACTOME_M_PHASE	REACTOME_M_PHASE		315	-0.18999	-0.934721	0.742424	0.787461	1	2323	tags=35%, list=29%, signal=47%
REACTOME_NUCLEAR_EVENTS_KINASE_AND_TRANSCRIPTION_FACTOR_ACTIVATION	REACTOME_NUCLEAR_EVENTS_KINASE_AND_TRANSCRIPTION_FACTOR_ACTIVATION		37	-0.265166	-0.925442	0.536232	0.808928	1	1564	tags=32%, list=20%, signal=40%
REACTOME_INHIBITION_OF_THE_PROTEOLYTIC_ACTIVITY_OF_APC_C_REQUIRED_FOR_THE_ONSET_OF_ANAPHASE_BY_MITOTIC_SPINDLE_CHECKPOINT_COMPONENTS	REACTOME_INHIBITION_OF_THE_PROTEOLYTIC_ACTIVITY_OF_APC_C_REQUIRED_FOR_THE_ONSET_OF_ANAPHASE_BY_MITOTIC_SPINDLE_CHECKPOINT_COMPONENTS		17	-0.319432	-0.921323	0.562802	0.81661	1	2835	tags=47%, list=36%, signal=73%
REACTOME_PROTEIN_UBIQUITINATION	REACTOME_PROTEIN_UBIQUITINATION		52	-0.242808	-0.920596	0.603175	0.815449	1	1232	tags=21%, list=15%, signal=25%
REACTOME_DISEASES_ASSOCIATED_WITH_GLYCOSAMINOGLYCAN_METABOLISM	REACTOME_DISEASES_ASSOCIATED_WITH_GLYCOSAMINOGLYCAN_METABOLISM		16	-0.326596	-0.917059	0.554667	0.821068	1	933	tags=25%, list=12%, signal=28%
REACTOME_FC_EPSILON_RECEPTOR_FCERI_SIGNALING	REACTOME_FC_EPSILON_RECEPTOR_FCERI_SIGNALING		101	-0.215585	-0.911265	0.676471	0.833146	1	2308	tags=42%, list=29%, signal=58%
REACTOME_NOTCH3_ACTIVATION_AND_TRANSMISSION_OF_SIGNAL_TO_THE_NUCLEUS	REACTOME_NOTCH3_ACTIVATION_AND_TRANSMISSION_OF_SIGNAL_TO_THE_NUCLEUS		15	-0.332042	-0.907312	0.563307	0.840092	1	15	tags=7%, list=0%, signal=7%
REACTOME_PLASMA_LIPOPROTEIN_ASSEMBLY_REMODELING_AND_CLEARANCE	REACTOME_PLASMA_LIPOPROTEIN_ASSEMBLY_REMODELING_AND_CLEARANCE		30	-0.275286	-0.905187	0.635616	0.842236	1	708	tags=20%, list=9%, signal=22%
REACTOME_ER_QUALITY_CONTROL_COMPARTMENT_ERQC	REACTOME_ER_QUALITY_CONTROL_COMPARTMENT_ERQC		18	-0.311893	-0.897333	0.623978	0.858815	1	365	tags=17%, list=5%, signal=17%
REACTOME_RECRUITMENT_OF_MITOTIC_CENTROSOME_PROTEINS_AND_COMPLEXES	REACTOME_RECRUITMENT_OF_MITOTIC_CENTROSOME_PROTEINS_AND_COMPLEXES		72	-0.224562	-0.89669	0.698246	0.857151	1	1373	tags=24%, list=17%, signal=28%
REACTOME_PKMTS_METHYLATE_HISTONE_LYSINES	REACTOME_PKMTS_METHYLATE_HISTONE_LYSINES		40	-0.257374	-0.896424	0.649275	0.854656	1	2528	tags=50%, list=32%, signal=73%
REACTOME_RECRUITMENT_OF_NUMA_TO_MITOTIC_CENTROSOMES	REACTOME_RECRUITMENT_OF_NUMA_TO_MITOTIC_CENTROSOMES		76	-0.225491	-0.895575	0.6787	0.853379	1	1448	tags=25%, list=18%, signal=30%
REACTOME_C_TYPE_LECTIN_RECEPTORS_CLRS	REACTOME_C_TYPE_LECTIN_RECEPTORS_CLRS		98	-0.214289	-0.893086	0.709544	0.856554	1	1405	tags=27%, list=18%, signal=32%
REACTOME_NS1_MEDIATED_EFFECTS_ON_HOST_PATHWAYS	REACTOME_NS1_MEDIATED_EFFECTS_ON_HOST_PATHWAYS		39	-0.249061	-0.889922	0.646526	0.861202	1	2292	tags=31%, list=29%, signal=43%
REACTOME_MRNA_SPLICING_MINOR_PATHWAY	REACTOME_MRNA_SPLICING_MINOR_PATHWAY		43	-0.247547	-0.88802	0.636066	0.862635	1	1926	tags=28%, list=24%, signal=37%
REACTOME_SIGNALING_BY_TGF_BETA_RECEPTOR_COMPLEX	REACTOME_SIGNALING_BY_TGF_BETA_RECEPTOR_COMPLEX		55	-0.232217	-0.882049	0.668965	0.874251	1	1550	tags=25%, list=19%, signal=31%
REACTOME_REGULATION_OF_TP53_ACTIVITY_THROUGH_ACETYLATION	REACTOME_REGULATION_OF_TP53_ACTIVITY_THROUGH_ACETYLATION		28	-0.276648	-0.881236	0.623595	0.873009	1	2458	tags=50%, list=31%, signal=72%
REACTOME_ACTIVATION_OF_ATR_IN_RESPONSE_TO_REPLICATION_STRESS	REACTOME_ACTIVATION_OF_ATR_IN_RESPONSE_TO_REPLICATION_STRESS		31	-0.262097	-0.875918	0.663793	0.882729	1	2772	tags=52%, list=35%, signal=79%
REACTOME_TRANS_GOLGI_NETWORK_VESICLE_BUDDING	REACTOME_TRANS_GOLGI_NETWORK_VESICLE_BUDDING		62	-0.225782	-0.872878	0.710884	0.887049	1	825	tags=10%, list=10%, signal=11%
REACTOME_ANTIGEN_PROCESSING_CROSS_PRESENTATION	REACTOME_ANTIGEN_PROCESSING_CROSS_PRESENTATION		75	-0.218177	-0.868187	0.735294	0.894741	1	1391	tags=25%, list=17%, signal=30%
REACTOME_DISEASES_OF_SIGNAL_TRANSDUCTION_BY_GROWTH_FACTOR_RECEPTORS_AND_SECOND_MESSENGERS	REACTOME_DISEASES_OF_SIGNAL_TRANSDUCTION_BY_GROWTH_FACTOR_RECEPTORS_AND_SECOND_MESSENGERS		253	-0.181416	-0.86444	0.882716	0.899944	1	1437	tags=22%, list=18%, signal=26%
REACTOME_SIGNALING_BY_INTERLEUKINS	REACTOME_SIGNALING_BY_INTERLEUKINS		223	-0.18138	-0.863367	0.898734	0.899001	1	1564	tags=26%, list=20%, signal=31%
REACTOME_CIRCADIAN_CLOCK	REACTOME_CIRCADIAN_CLOCK		49	-0.235354	-0.856318	0.721683	0.911404	1	2028	tags=41%, list=25%, signal=54%
REACTOME_TGF_BETA_RECEPTOR_SIGNALING_ACTIVATES_SMADS	REACTOME_TGF_BETA_RECEPTOR_SIGNALING_ACTIVATES_SMADS		22	-0.274672	-0.852185	0.677835	0.917242	1	1550	tags=32%, list=19%, signal=39%
REACTOME_CYCLIN_A_B1_B2_ASSOCIATED_EVENTS_DURING_G2_M_TRANSITION	REACTOME_CYCLIN_A_B1_B2_ASSOCIATED_EVENTS_DURING_G2_M_TRANSITION		21	-0.285954	-0.849171	0.709762	0.920552	1	1169	tags=29%, list=15%, signal=33%
REACTOME_APOPTOSIS	REACTOME_APOPTOSIS		138	-0.184365	-0.836512	0.873874	0.944542	1	2308	tags=36%, list=29%, signal=50%
REACTOME_NR1H2_AND_NR1H3_MEDIATED_SIGNALING	REACTOME_NR1H2_AND_NR1H3_MEDIATED_SIGNALING		31	-0.246364	-0.835481	0.75	0.943324	1	2028	tags=35%, list=25%, signal=47%
REACTOME_AUTOPHAGY	REACTOME_AUTOPHAGY		103	-0.193188	-0.826092	0.859504	0.960159	1	1136	tags=16%, list=14%, signal=18%
REACTOME_HOMOLOGOUS_DNA_PAIRING_AND_STRAND_EXCHANGE	REACTOME_HOMOLOGOUS_DNA_PAIRING_AND_STRAND_EXCHANGE		36	-0.238011	-0.82275	0.754601	0.963361	1	1774	tags=33%, list=22%, signal=43%
REACTOME_MAPK_TARGETS_NUCLEAR_EVENTS_MEDIATED_BY_MAP_KINASES	REACTOME_MAPK_TARGETS_NUCLEAR_EVENTS_MEDIATED_BY_MAP_KINASES		24	-0.26332	-0.820606	0.734417	0.96431	1	1564	tags=33%, list=20%, signal=41%
REACTOME_NETRIN_1_SIGNALING	REACTOME_NETRIN_1_SIGNALING		21	-0.26576	-0.819094	0.745856	0.963873	1	1751	tags=38%, list=22%, signal=49%
REACTOME_POSITIVE_EPIGENETIC_REGULATION_OF_RRNA_EXPRESSION	REACTOME_POSITIVE_EPIGENETIC_REGULATION_OF_RRNA_EXPRESSION		47	-0.229856	-0.817879	0.794304	0.962943	1	1910	tags=40%, list=24%, signal=53%
REACTOME_DOWNREGULATION_OF_TGF_BETA_RECEPTOR_SIGNALING	REACTOME_DOWNREGULATION_OF_TGF_BETA_RECEPTOR_SIGNALING		18	-0.281898	-0.814796	0.702703	0.965411	1	1309	tags=28%, list=16%, signal=33%
REACTOME_RHO_GTPASES_ACTIVATE_FORMINS	REACTOME_RHO_GTPASES_ACTIVATE_FORMINS		110	-0.186006	-0.810727	0.914163	0.969595	1	1388	tags=21%, list=17%, signal=25%
REACTOME_RESPONSE_OF_EIF2AK4_GCN2_TO_AMINO_ACID_DEFICIENCY	REACTOME_RESPONSE_OF_EIF2AK4_GCN2_TO_AMINO_ACID_DEFICIENCY		85	-0.19465	-0.803399	0.86747	0.980008	1	1564	tags=20%, list=20%, signal=25%
REACTOME_CHOLESTEROL_BIOSYNTHESIS	REACTOME_CHOLESTEROL_BIOSYNTHESIS		22	-0.262562	-0.803068	0.744361	0.977222	1	1107	tags=27%, list=14%, signal=32%
REACTOME_NONHOMOLOGOUS_END_JOINING_NHEJ	REACTOME_NONHOMOLOGOUS_END_JOINING_NHEJ		34	-0.232844	-0.790666	0.804805	0.996161	1	1992	tags=32%, list=25%, signal=43%
REACTOME_INTERLEUKIN_17_SIGNALING	REACTOME_INTERLEUKIN_17_SIGNALING		49	-0.213476	-0.788754	0.841216	0.996039	1	1564	tags=27%, list=20%, signal=33%
REACTOME_SIGNALING_BY_FGFR2_IN_DISEASE	REACTOME_SIGNALING_BY_FGFR2_IN_DISEASE		19	-0.264928	-0.788592	0.802667	0.992885	1	1906	tags=26%, list=24%, signal=35%
REACTOME_ERK_MAPK_TARGETS	REACTOME_ERK_MAPK_TARGETS		17	-0.273275	-0.778448	0.77551	1	1	1283	tags=29%, list=16%, signal=35%
REACTOME_HCMV_EARLY_EVENTS	REACTOME_HCMV_EARLY_EVENTS		67	-0.195094	-0.774592	0.859873	1	1	2028	tags=30%, list=25%, signal=40%
REACTOME_PROGRAMMED_CELL_DEATH	REACTOME_PROGRAMMED_CELL_DEATH		158	-0.170617	-0.767691	0.963158	1	1	2308	tags=36%, list=29%, signal=50%
REACTOME_CELLULAR_RESPONSE_TO_STARVATION	REACTOME_CELLULAR_RESPONSE_TO_STARVATION		120	-0.173639	-0.751888	0.963964	1	1	1772	tags=23%, list=22%, signal=28%
REACTOME_TP53_REGULATES_TRANSCRIPTION_OF_GENES_INVOLVED_IN_G2_CELL_CYCLE_ARREST	REACTOME_TP53_REGULATES_TRANSCRIPTION_OF_GENES_INVOLVED_IN_G2_CELL_CYCLE_ARREST		15	-0.266474	-0.749348	0.789062	1	1	2616	tags=53%, list=33%, signal=79%
REACTOME_BMAL1_CLOCK_NPAS2_ACTIVATES_CIRCADIAN_GENE_EXPRESSION	REACTOME_BMAL1_CLOCK_NPAS2_ACTIVATES_CIRCADIAN_GENE_EXPRESSION		18	-0.260289	-0.749265	0.852332	1	1	2231	tags=44%, list=28%, signal=62%
REACTOME_TRANSPORT_OF_VITAMINS_NUCLEOSIDES_AND_RELATED_MOLECULES	REACTOME_TRANSPORT_OF_VITAMINS_NUCLEOSIDES_AND_RELATED_MOLECULES		16	-0.266871	-0.743682	0.824742	1	1	59	tags=6%, list=1%, signal=6%
REACTOME_FOXO_MEDIATED_TRANSCRIPTION	REACTOME_FOXO_MEDIATED_TRANSCRIPTION		36	-0.213023	-0.742009	0.882166	1	1	2101	tags=39%, list=26%, signal=53%
REACTOME_TOLL_LIKE_RECEPTOR_TLR1_TLR2_CASCADE	REACTOME_TOLL_LIKE_RECEPTOR_TLR1_TLR2_CASCADE		60	-0.189467	-0.736148	0.949527	1	1	1564	tags=23%, list=20%, signal=29%
REACTOME_NUCLEAR_RECEPTOR_TRANSCRIPTION_PATHWAY	REACTOME_NUCLEAR_RECEPTOR_TRANSCRIPTION_PATHWAY		17	-0.253324	-0.734452	0.856383	1	1	1890	tags=41%, list=24%, signal=54%
REACTOME_SUMOYLATION_OF_UBIQUITINYLATION_PROTEINS	REACTOME_SUMOYLATION_OF_UBIQUITINYLATION_PROTEINS		36	-0.209884	-0.729969	0.890578	1	1	2292	tags=31%, list=29%, signal=43%
REACTOME_MYD88_INDEPENDENT_TLR4_CASCADE	REACTOME_MYD88_INDEPENDENT_TLR4_CASCADE		69	-0.183385	-0.724669	0.954545	1	1	1564	tags=22%, list=20%, signal=27%
REACTOME_NUCLEAR_IMPORT_OF_REV_PROTEIN	REACTOME_NUCLEAR_IMPORT_OF_REV_PROTEIN		34	-0.208676	-0.719136	0.905488	1	1	2292	tags=29%, list=29%, signal=41%
REACTOME_SUMOYLATION_OF_SUMOYLATION_PROTEINS	REACTOME_SUMOYLATION_OF_SUMOYLATION_PROTEINS		33	-0.211567	-0.718876	0.895044	1	1	2292	tags=30%, list=29%, signal=42%
REACTOME_AGGREPHAGY	REACTOME_AGGREPHAGY		24	-0.2334	-0.709482	0.87664	1	1	1337	tags=25%, list=17%, signal=30%
REACTOME_TOLL_LIKE_RECEPTOR_9_TLR9_CASCADE	REACTOME_TOLL_LIKE_RECEPTOR_9_TLR9_CASCADE		65	-0.182557	-0.707954	0.962457	1	1	1432	tags=20%, list=18%, signal=24%
REACTOME_MITOPHAGY	REACTOME_MITOPHAGY		23	-0.229797	-0.705995	0.851064	1	1	451	tags=9%, list=6%, signal=9%
REACTOME_RHO_GTPASES_ACTIVATE_PAKS	REACTOME_RHO_GTPASES_ACTIVATE_PAKS		18	-0.243747	-0.70265	0.867347	1	1	1025	tags=17%, list=13%, signal=19%
REACTOME_MITOCHONDRIAL_TRANSLATION	REACTOME_MITOCHONDRIAL_TRANSLATION		85	-0.173941	-0.701839	0.959839	1	1	412	tags=6%, list=5%, signal=6%
REACTOME_ACTIVATION_OF_ANTERIOR_HOX_GENES_IN_HINDBRAIN_DEVELOPMENT_DURING_EARLY_EMBRYOGENESIS	REACTOME_ACTIVATION_OF_ANTERIOR_HOX_GENES_IN_HINDBRAIN_DEVELOPMENT_DURING_EARLY_EMBRYOGENESIS		44	-0.19409	-0.68905	0.942771	1	1	2196	tags=39%, list=28%, signal=53%
REACTOME_INTRINSIC_PATHWAY_FOR_APOPTOSIS	REACTOME_INTRINSIC_PATHWAY_FOR_APOPTOSIS		41	-0.191405	-0.68849	0.932886	1	1	1364	tags=15%, list=17%, signal=18%
REACTOME_NONSENSE_MEDIATED_DECAY_NMD	REACTOME_NONSENSE_MEDIATED_DECAY_NMD		100	-0.162134	-0.682357	0.989091	1	1	1523	tags=16%, list=19%, signal=20%
REACTOME_SIGNALING_BY_HIPPO	REACTOME_SIGNALING_BY_HIPPO		16	-0.242432	-0.681311	0.882199	1	1	2213	tags=38%, list=28%, signal=52%
REACTOME_TRANSPORT_OF_MATURE_MRNAS_DERIVED_FROM_INTRONLESS_TRANSCRIPTS	REACTOME_TRANSPORT_OF_MATURE_MRNAS_DERIVED_FROM_INTRONLESS_TRANSCRIPTS		43	-0.187362	-0.678845	0.955696	1	1	1888	tags=23%, list=24%, signal=30%
REACTOME_GLYCOLYSIS	REACTOME_GLYCOLYSIS		62	-0.173898	-0.678727	0.991045	1	1	1959	tags=26%, list=25%, signal=34%
REACTOME_POTENTIAL_THERAPEUTICS_FOR_SARS	REACTOME_POTENTIAL_THERAPEUTICS_FOR_SARS		60	-0.174466	-0.678047	0.967971	1	1	2458	tags=42%, list=31%, signal=60%
REACTOME_TRANSCRIPTIONAL_REGULATION_BY_E2F6	REACTOME_TRANSCRIPTIONAL_REGULATION_BY_E2F6		26	-0.207883	-0.6737	0.931759	1	1	2196	tags=50%, list=28%, signal=69%
REACTOME_EUKARYOTIC_TRANSLATION_ELONGATION	REACTOME_EUKARYOTIC_TRANSLATION_ELONGATION		82	-0.166302	-0.671449	0.992857	1	1	1499	tags=17%, list=19%, signal=21%
REACTOME_FGFR1_MUTANT_RECEPTOR_ACTIVATION	REACTOME_FGFR1_MUTANT_RECEPTOR_ACTIVATION		20	-0.224798	-0.668561	0.902507	1	1	2072	tags=30%, list=26%, signal=40%
REACTOME_ABERRANT_REGULATION_OF_MITOTIC_EXIT_IN_CANCER_DUE_TO_RB1_DEFECTS	REACTOME_ABERRANT_REGULATION_OF_MITOTIC_EXIT_IN_CANCER_DUE_TO_RB1_DEFECTS		15	-0.243838	-0.667077	0.894578	1	1	6029	tags=100%, list=76%, signal=410%
REACTOME_TRANSCRIPTIONAL_REGULATION_BY_MECP2	REACTOME_TRANSCRIPTIONAL_REGULATION_BY_MECP2		34	-0.197341	-0.664425	0.949685	1	1	1597	tags=24%, list=20%, signal=29%
REACTOME_CONVERSION_FROM_APC_C_CDC20_TO_APC_C_CDH1_IN_LATE_ANAPHASE	REACTOME_CONVERSION_FROM_APC_C_CDC20_TO_APC_C_CDH1_IN_LATE_ANAPHASE		15	-0.243838	-0.663981	0.880829	1	1	6029	tags=100%, list=76%, signal=410%
REACTOME_RHOU_GTPASE_CYCLE	REACTOME_RHOU_GTPASE_CYCLE		31	-0.197488	-0.663042	0.961877	1	1	1827	tags=29%, list=23%, signal=38%
REACTOME_SIGNALING_BY_INSULIN_RECEPTOR	REACTOME_SIGNALING_BY_INSULIN_RECEPTOR		37	-0.191301	-0.661765	0.957143	1	1	2071	tags=27%, list=26%, signal=36%
REACTOME_SEMA4D_INDUCED_CELL_MIGRATION_AND_GROWTH_CONE_COLLAPSE	REACTOME_SEMA4D_INDUCED_CELL_MIGRATION_AND_GROWTH_CONE_COLLAPSE		16	-0.230653	-0.65918	0.901449	1	1	1007	tags=19%, list=13%, signal=21%
REACTOME_CD209_DC_SIGN_SIGNALING	REACTOME_CD209_DC_SIGN_SIGNALING		16	-0.238972	-0.650846	0.91	1	1	1647	tags=31%, list=21%, signal=39%
REACTOME_SUMOYLATION_OF_DNA_DAMAGE_RESPONSE_AND_REPAIR_PROTEINS	REACTOME_SUMOYLATION_OF_DNA_DAMAGE_RESPONSE_AND_REPAIR_PROTEINS		68	-0.161416	-0.642485	1	1	1	1681	tags=22%, list=21%, signal=28%
REACTOME_SIGNALING_BY_CYTOSOLIC_FGFR1_FUSION_MUTANTS	REACTOME_SIGNALING_BY_CYTOSOLIC_FGFR1_FUSION_MUTANTS		18	-0.220122	-0.629126	0.910811	1	1	2072	tags=28%, list=26%, signal=37%
REACTOME_DARPP_32_EVENTS	REACTOME_DARPP_32_EVENTS		15	-0.22692	-0.628286	0.912195	1	1	1214	tags=20%, list=15%, signal=24%
REACTOME_SUMOYLATION	REACTOME_SUMOYLATION		130	-0.140358	-0.616492	1	1	1	2061	tags=25%, list=26%, signal=34%
REACTOME_EXPORT_OF_VIRAL_RIBONUCLEOPROTEINS_FROM_NUCLEUS	REACTOME_EXPORT_OF_VIRAL_RIBONUCLEOPROTEINS_FROM_NUCLEUS		32	-0.182105	-0.611247	0.957983	1	1	6523	tags=100%, list=82%, signal=550%
REACTOME_SIGNALING_BY_TYPE_1_INSULIN_LIKE_GROWTH_FACTOR_1_RECEPTOR_IGF1R	REACTOME_SIGNALING_BY_TYPE_1_INSULIN_LIKE_GROWTH_FACTOR_1_RECEPTOR_IGF1R		24	-0.196743	-0.610092	0.971671	1	1	2007	tags=29%, list=25%, signal=39%
REACTOME_REGULATION_OF_PTEN_GENE_TRANSCRIPTION	REACTOME_REGULATION_OF_PTEN_GENE_TRANSCRIPTION		47	-0.165026	-0.599778	0.98503	1	1	1644	tags=26%, list=21%, signal=32%
REACTOME_TRANSPORT_OF_THE_SLBP_DEPENDANT_MATURE_MRNA	REACTOME_TRANSPORT_OF_THE_SLBP_DEPENDANT_MATURE_MRNA		36	-0.169534	-0.599309	0.994065	1	1	1888	tags=22%, list=24%, signal=29%
REACTOME_REGULATION_OF_GLUCOKINASE_BY_GLUCOKINASE_REGULATORY_PROTEIN	REACTOME_REGULATION_OF_GLUCOKINASE_BY_GLUCOKINASE_REGULATORY_PROTEIN		31	-0.182082	-0.595801	0.982955	1	1	6523	tags=100%, list=82%, signal=550%
REACTOME_KINESINS	REACTOME_KINESINS		36	-0.173549	-0.595509	0.988571	1	1	2453	tags=44%, list=31%, signal=64%
REACTOME_SYNTHESIS_OF_PIPS_AT_THE_EARLY_ENDOSOME_MEMBRANE	REACTOME_SYNTHESIS_OF_PIPS_AT_THE_EARLY_ENDOSOME_MEMBRANE		16	-0.210904	-0.590503	0.956164	1	1	1021	tags=19%, list=13%, signal=21%
REACTOME_TRAF6_MEDIATED_NF_KB_ACTIVATION	REACTOME_TRAF6_MEDIATED_NF_KB_ACTIVATION		18	-0.202919	-0.587964	0.961039	1	1	6355	tags=100%, list=80%, signal=493%
REACTOME_POSTMITOTIC_NUCLEAR_PORE_COMPLEX_NPC_REFORMATION	REACTOME_POSTMITOTIC_NUCLEAR_PORE_COMPLEX_NPC_REFORMATION		27	-0.180227	-0.587726	0.974432	1	1	6537	tags=100%, list=82%, signal=555%
REACTOME_SIGNALING_BY_FGFR1_IN_DISEASE	REACTOME_SIGNALING_BY_FGFR1_IN_DISEASE		25	-0.184569	-0.580995	0.982857	1	1	2072	tags=28%, list=26%, signal=38%
REACTOME_HCMV_INFECTION	REACTOME_HCMV_INFECTION		85	-0.137796	-0.573675	1	1	1	2028	tags=27%, list=25%, signal=36%
REACTOME_SIGNALING_BY_PDGFR_IN_DISEASE	REACTOME_SIGNALING_BY_PDGFR_IN_DISEASE		17	-0.198239	-0.570729	0.952381	1	1	6392	tags=100%, list=80%, signal=505%
REACTOME_IRS_MEDIATED_SIGNALLING	REACTOME_IRS_MEDIATED_SIGNALLING		21	-0.18493	-0.557018	0.978667	1	1	2007	tags=29%, list=25%, signal=38%
REACTOME_AMINO_ACIDS_REGULATE_MTORC1	REACTOME_AMINO_ACIDS_REGULATE_MTORC1		35	-0.159326	-0.552479	0.987461	1	1	922	tags=14%, list=12%, signal=16%
REACTOME_TRAF6_MEDIATED_IRF7_ACTIVATION	REACTOME_TRAF6_MEDIATED_IRF7_ACTIVATION		15	-0.202842	-0.549198	0.962217	1	1	6355	tags=100%, list=80%, signal=493%
REACTOME_SUMOYLATION_OF_RNA_BINDING_PROTEINS	REACTOME_SUMOYLATION_OF_RNA_BINDING_PROTEINS		44	-0.14351	-0.527287	1	1	1	1681	tags=23%, list=21%, signal=29%
REACTOME_SUMOYLATION_OF_DNA_REPLICATION_PROTEINS	REACTOME_SUMOYLATION_OF_DNA_REPLICATION_PROTEINS		43	-0.145346	-0.514993	1	1	1	1144	tags=14%, list=14%, signal=16%
REACTOME_SIGNALING_BY_FGFR2	REACTOME_SIGNALING_BY_FGFR2		40	-0.137534	-0.487884	1	1	1	2015	tags=23%, list=25%, signal=30%
REACTOME_NUCLEAR_PORE_COMPLEX_NPC_DISASSEMBLY	REACTOME_NUCLEAR_PORE_COMPLEX_NPC_DISASSEMBLY		36	-0.133669	-0.459289	1	1	1	2292	tags=28%, list=29%, signal=39%
REACTOME_INSULIN_RECEPTOR_SIGNALLING_CASCADE	REACTOME_INSULIN_RECEPTOR_SIGNALLING_CASCADE		26	-0.136129	-0.435845	1	1	1	6887	tags=100%, list=86%, signal=735%
REACTOME_DISEASES_OF_MITOTIC_CELL_CYCLE	REACTOME_DISEASES_OF_MITOTIC_CELL_CYCLE		25	-0.132661	-0.428749	1	0.999159	1	2835	tags=44%, list=36%, signal=68%

## Sheet: GOMF_up_in_sgNCOA4-1
NAME	GS<br> follow link to MSigDB	GS DETAILS	SIZE	ES	NES	NOM p-val	FDR q-val	FWER p-val	RANK AT MAX	LEADING EDGE
GOMF_TRANSFERASE_ACTIVITY_TRANSFERRING_HEXOSYL_GROUPS	GOMF_TRANSFERASE_ACTIVITY_TRANSFERRING_HEXOSYL_GROUPS	Details ...	87	0.584608	2.11243	0	0	0	1923	tags=52%, list=24%, signal=67%
GOMF_TRANSPORTER_ACTIVITY	GOMF_TRANSPORTER_ACTIVITY	Details ...	347	0.479521	2.05158	0	0.00169246	0.004	2186	tags=50%, list=27%, signal=66%
GOMF_ANION_TRANSMEMBRANE_TRANSPORTER_ACTIVITY	GOMF_ANION_TRANSMEMBRANE_TRANSPORTER_ACTIVITY	Details ...	146	0.508815	1.99605	0	0.00305903	0.011	2186	tags=49%, list=27%, signal=67%
GOMF_ION_TRANSMEMBRANE_TRANSPORTER_ACTIVITY	GOMF_ION_TRANSMEMBRANE_TRANSPORTER_ACTIVITY	Details ...	260	0.473803	1.96225	0	0.00457092	0.022	2186	tags=50%, list=27%, signal=66%
GOMF_ACTIVE_TRANSMEMBRANE_TRANSPORTER_ACTIVITY	GOMF_ACTIVE_TRANSMEMBRANE_TRANSPORTER_ACTIVITY	Details ...	94	0.520811	1.94064	0	0.00613118	0.037	2090	tags=48%, list=26%, signal=64%
GOMF_LIPID_TRANSPORTER_ACTIVITY	GOMF_LIPID_TRANSPORTER_ACTIVITY	Details ...	67	0.561012	1.92763	0	0.00732945	0.053	1919	tags=60%, list=24%, signal=78%
GOMF_TRANSFERASE_ACTIVITY_TRANSFERRING_GLYCOSYL_GROUPS	GOMF_TRANSFERASE_ACTIVITY_TRANSFERRING_GLYCOSYL_GROUPS	Details ...	119	0.498537	1.91528	0	0.00805139	0.067	1923	tags=45%, list=24%, signal=58%
GOMF_PASSIVE_TRANSMEMBRANE_TRANSPORTER_ACTIVITY	GOMF_PASSIVE_TRANSMEMBRANE_TRANSPORTER_ACTIVITY	Details ...	81	0.52516	1.89067	0	0.0114197	0.104	1061	tags=38%, list=13%, signal=44%
GOMF_UDP_GLYCOSYLTRANSFERASE_ACTIVITY	GOMF_UDP_GLYCOSYLTRANSFERASE_ACTIVITY	Details ...	56	0.550243	1.87669	0	0.0125621	0.127	1923	tags=46%, list=24%, signal=61%
GOMF_ALCOHOL_BINDING	GOMF_ALCOHOL_BINDING	Details ...	37	0.598937	1.87642	0.00151745	0.0114665	0.129	1896	tags=57%, list=24%, signal=74%
GOMF_GDP_BINDING	GOMF_GDP_BINDING	Details ...	50	0.553087	1.86517	0	0.012516	0.154	2116	tags=58%, list=27%, signal=78%
GOMF_INORGANIC_ANION_TRANSMEMBRANE_TRANSPORTER_ACTIVITY	GOMF_INORGANIC_ANION_TRANSMEMBRANE_TRANSPORTER_ACTIVITY	Details ...	47	0.569899	1.86156	0	0.0121685	0.162	1980	tags=51%, list=25%, signal=68%
GOMF_CELL_ADHESION_MEDIATOR_ACTIVITY	GOMF_CELL_ADHESION_MEDIATOR_ACTIVITY	Details ...	34	0.608107	1.85682	0	0.0119965	0.174	1729	tags=65%, list=22%, signal=82%
GOMF_PRIMARY_ACTIVE_TRANSMEMBRANE_TRANSPORTER_ACTIVITY	GOMF_PRIMARY_ACTIVE_TRANSMEMBRANE_TRANSPORTER_ACTIVITY	Details ...	28	0.627814	1.85292	0	0.0120939	0.185	907	tags=39%, list=11%, signal=44%
GOMF_MOLECULAR_TRANSDUCER_ACTIVITY	GOMF_MOLECULAR_TRANSDUCER_ACTIVITY	Details ...	176	0.456633	1.82959	0	0.0152658	0.241	1109	tags=32%, list=14%, signal=37%
GOMF_TRANSITION_METAL_ION_TRANSMEMBRANE_TRANSPORTER_ACTIVITY	GOMF_TRANSITION_METAL_ION_TRANSMEMBRANE_TRANSPORTER_ACTIVITY	Details ...	18	0.6748	1.8156	0.00309598	0.0170967	0.28	1980	tags=67%, list=25%, signal=89%
GOMF_GATED_CHANNEL_ACTIVITY	GOMF_GATED_CHANNEL_ACTIVITY	Details ...	48	0.550322	1.81473	0	0.0161364	0.281	1061	tags=44%, list=13%, signal=50%
GOMF_ORGANIC_ANION_TRANSMEMBRANE_TRANSPORTER_ACTIVITY	GOMF_ORGANIC_ANION_TRANSMEMBRANE_TRANSPORTER_ACTIVITY	Details ...	56	0.528854	1.80362	0.00142857	0.0177676	0.318	2161	tags=50%, list=27%, signal=68%
GOMF_EXTRACELLULAR_MATRIX_STRUCTURAL_CONSTITUENT	GOMF_EXTRACELLULAR_MATRIX_STRUCTURAL_CONSTITUENT	Details ...	39	0.570354	1.79862	0	0.0177062	0.334	530	tags=33%, list=7%, signal=36%
GOMF_PHOSPHOLIPID_TRANSPORTER_ACTIVITY	GOMF_PHOSPHOLIPID_TRANSPORTER_ACTIVITY	Details ...	27	0.605177	1.78465	0.00936037	0.0201301	0.392	1836	tags=56%, list=23%, signal=72%
GOMF_ACID_THIOL_LIGASE_ACTIVITY	GOMF_ACID_THIOL_LIGASE_ACTIVITY		18	0.666773	1.76067	0.00463679	0.0266766	0.499	1727	tags=67%, list=22%, signal=85%
GOMF_NON_MEMBRANE_SPANNING_PROTEIN_TYROSINE_KINASE_ACTIVITY	GOMF_NON_MEMBRANE_SPANNING_PROTEIN_TYROSINE_KINASE_ACTIVITY		30	0.585318	1.74602	0.00149477	0.029368	0.553	2472	tags=60%, list=31%, signal=87%
GOMF_CATION_TRANSMEMBRANE_TRANSPORTER_ACTIVITY	GOMF_CATION_TRANSMEMBRANE_TRANSPORTER_ACTIVITY		152	0.444097	1.72482	0	0.0359669	0.624	2481	tags=58%, list=31%, signal=82%
GOMF_ACTIVE_ION_TRANSMEMBRANE_TRANSPORTER_ACTIVITY	GOMF_ACTIVE_ION_TRANSMEMBRANE_TRANSPORTER_ACTIVITY		62	0.500827	1.72216	0.00136054	0.0355106	0.635	2090	tags=50%, list=26%, signal=67%
GOMF_O_ACYLTRANSFERASE_ACTIVITY	GOMF_O_ACYLTRANSFERASE_ACTIVITY		25	0.590596	1.7205	0.00152439	0.0345901	0.642	1041	tags=48%, list=13%, signal=55%
GOMF_GROWTH_FACTOR_RECEPTOR_BINDING	GOMF_GROWTH_FACTOR_RECEPTOR_BINDING		51	0.512062	1.70815	0.00149031	0.0382535	0.696	1205	tags=27%, list=15%, signal=32%
GOMF_TETRAPYRROLE_BINDING	GOMF_TETRAPYRROLE_BINDING		45	0.52647	1.70683	0.00296296	0.0376604	0.703	636	tags=24%, list=8%, signal=26%
GOMF_CHLORIDE_TRANSMEMBRANE_TRANSPORTER_ACTIVITY	GOMF_CHLORIDE_TRANSMEMBRANE_TRANSPORTER_ACTIVITY		24	0.5942	1.70549	0.00456621	0.036758	0.708	1250	tags=46%, list=16%, signal=54%
GOMF_CHOLESTEROL_BINDING	GOMF_CHOLESTEROL_BINDING		25	0.58561	1.67846	0.0060241	0.0472783	0.806	1886	tags=56%, list=24%, signal=73%
GOMF_SECONDARY_ACTIVE_TRANSMEMBRANE_TRANSPORTER_ACTIVITY	GOMF_SECONDARY_ACTIVE_TRANSMEMBRANE_TRANSPORTER_ACTIVITY		67	0.479899	1.66613	0.00141643	0.0520893	0.839	2090	tags=45%, list=26%, signal=60%
GOMF_METAL_ION_TRANSMEMBRANE_TRANSPORTER_ACTIVITY	GOMF_METAL_ION_TRANSMEMBRANE_TRANSPORTER_ACTIVITY		85	0.463193	1.66363	0.00133869	0.0516081	0.842	2069	tags=53%, list=26%, signal=71%
GOMF_PROTEIN_TYROSINE_KINASE_ACTIVITY	GOMF_PROTEIN_TYROSINE_KINASE_ACTIVITY		68	0.466936	1.64906	0	0.0582304	0.884	2531	tags=51%, list=32%, signal=75%
GOMF_LIPID_TRANSFER_ACTIVITY	GOMF_LIPID_TRANSFER_ACTIVITY		24	0.577328	1.64847	0.00928793	0.0567886	0.886	1866	tags=54%, list=23%, signal=71%
GOMF_ORGANIC_ACID_TRANSMEMBRANE_TRANSPORTER_ACTIVITY	GOMF_ORGANIC_ACID_TRANSMEMBRANE_TRANSPORTER_ACTIVITY		45	0.500463	1.64707	0.00878477	0.0560422	0.893	2555	tags=64%, list=32%, signal=94%
GOMF_OXIDOREDUCTASE_ACTIVITY_ACTING_ON_PAIRED_DONORS_WITH_INCORPORATION_OR_REDUCTION_OF_MOLECULAR_OXYGEN	GOMF_OXIDOREDUCTASE_ACTIVITY_ACTING_ON_PAIRED_DONORS_WITH_INCORPORATION_OR_REDUCTION_OF_MOLECULAR_OXYGEN		69	0.46017	1.64689	0	0.0545827	0.893	1047	tags=36%, list=13%, signal=41%
GOMF_STEROL_BINDING	GOMF_STEROL_BINDING		29	0.544288	1.63914	0.0125392	0.0571514	0.911	1886	tags=48%, list=24%, signal=63%
GOMF_CELL_CELL_ADHESION_MEDIATOR_ACTIVITY	GOMF_CELL_CELL_ADHESION_MEDIATOR_ACTIVITY		27	0.56097	1.63577	0.0109204	0.0576186	0.919	1729	tags=59%, list=22%, signal=75%
GOMF_PHOSPHATIDYLSERINE_BINDING	GOMF_PHOSPHATIDYLSERINE_BINDING		28	0.55037	1.63276	0.0106707	0.0577866	0.922	1339	tags=46%, list=17%, signal=56%
GOMF_GLUCOSYLTRANSFERASE_ACTIVITY	GOMF_GLUCOSYLTRANSFERASE_ACTIVITY		15	0.642502	1.61979	0.0127389	0.0644787	0.945	1808	tags=60%, list=23%, signal=77%
GOMF_MODIFIED_AMINO_ACID_BINDING	GOMF_MODIFIED_AMINO_ACID_BINDING		45	0.493677	1.61812	0.00725689	0.0640264	0.948	1339	tags=40%, list=17%, signal=48%
GOMF_LIGASE_ACTIVITY_FORMING_CARBON_SULFUR_BONDS	GOMF_LIGASE_ACTIVITY_FORMING_CARBON_SULFUR_BONDS		28	0.545344	1.61441	0.0151515	0.0647499	0.956	2623	tags=64%, list=33%, signal=96%
GOMF_ANION_CHANNEL_ACTIVITY	GOMF_ANION_CHANNEL_ACTIVITY		25	0.552567	1.60942	0.0119403	0.0665819	0.964	1061	tags=36%, list=13%, signal=41%
GOMF_PHOSPHATIDYLINOSITOL_3_5_BISPHOSPHATE_BINDING	GOMF_PHOSPHATIDYLINOSITOL_3_5_BISPHOSPHATE_BINDING		20	0.596198	1.60569	0.0114379	0.0672492	0.967	1954	tags=60%, list=25%, signal=79%
GOMF_CATION_CHANNEL_ACTIVITY	GOMF_CATION_CHANNEL_ACTIVITY		49	0.488235	1.60056	0.011611	0.069306	0.971	1025	tags=39%, list=13%, signal=44%
GOMF_PHOSPHATIDYLINOSITOL_BISPHOSPHATE_BINDING	GOMF_PHOSPHATIDYLINOSITOL_BISPHOSPHATE_BINDING		55	0.472316	1.59118	0.00688705	0.0742914	0.977	1666	tags=42%, list=21%, signal=53%
GOMF_ACETYLGALACTOSAMINYLTRANSFERASE_ACTIVITY	GOMF_ACETYLGALACTOSAMINYLTRANSFERASE_ACTIVITY		15	0.609671	1.57911	0.0320405	0.0817361	0.988	657	tags=33%, list=8%, signal=36%
GOMF_CARBOHYDRATE_BINDING	GOMF_CARBOHYDRATE_BINDING		96	0.425584	1.57834	0.00425532	0.0805408	0.988	1513	tags=38%, list=19%, signal=46%
GOMF_GTPASE_ACTIVITY	GOMF_GTPASE_ACTIVITY		186	0.392561	1.5762	0	0.0802815	0.99	2312	tags=44%, list=29%, signal=60%
GOMF_MONOOXYGENASE_ACTIVITY	GOMF_MONOOXYGENASE_ACTIVITY		31	0.509322	1.54832	0.0245776	0.101662	0.998	984	tags=45%, list=12%, signal=51%
GOMF_PHOSPHOLIPID_BINDING	GOMF_PHOSPHOLIPID_BINDING		256	0.374123	1.54435	0	0.103596	0.999	1666	tags=30%, list=21%, signal=37%
GOMF_AMINO_ACID_TRANSMEMBRANE_TRANSPORTER_ACTIVITY	GOMF_AMINO_ACID_TRANSMEMBRANE_TRANSPORTER_ACTIVITY		24	0.534468	1.53663	0.02526	0.108467	1	2481	tags=67%, list=31%, signal=97%
GOMF_LIPID_BINDING	GOMF_LIPID_BINDING		369	0.354937	1.5088	0	0.134249	1	2243	tags=39%, list=28%, signal=52%
GOMF_SYMPORTER_ACTIVITY	GOMF_SYMPORTER_ACTIVITY		32	0.489464	1.50572	0.0344828	0.135419	1	2090	tags=53%, list=26%, signal=72%
GOMF_TRANSFERASE_ACTIVITY_TRANSFERRING_NITROGENOUS_GROUPS	GOMF_TRANSFERASE_ACTIVITY_TRANSFERRING_NITROGENOUS_GROUPS		16	0.566193	1.50115	0.0543657	0.137868	1	1819	tags=44%, list=23%, signal=57%
GOMF_STEROL_TRANSPORTER_ACTIVITY	GOMF_STEROL_TRANSPORTER_ACTIVITY		21	0.545077	1.4979	0.0417957	0.139016	1	1866	tags=52%, list=23%, signal=68%
GOMF_EPHRIN_RECEPTOR_BINDING	GOMF_EPHRIN_RECEPTOR_BINDING		15	0.594212	1.49537	0.0507937	0.139145	1	1057	tags=27%, list=13%, signal=31%
GOMF_PHOSPHATIDYLINOSITOL_BINDING	GOMF_PHOSPHATIDYLINOSITOL_BINDING		158	0.378883	1.49527	0.0037594	0.136777	1	1666	tags=32%, list=21%, signal=39%
GOMF_LAMININ_BINDING	GOMF_LAMININ_BINDING		20	0.550905	1.4883	0.0484848	0.142166	1	793	tags=30%, list=10%, signal=33%
GOMF_AMINOPEPTIDASE_ACTIVITY	GOMF_AMINOPEPTIDASE_ACTIVITY		28	0.499892	1.48753	0.0283159	0.140572	1	1503	tags=32%, list=19%, signal=39%
GOMF_EPIDERMAL_GROWTH_FACTOR_RECEPTOR_BINDING	GOMF_EPIDERMAL_GROWTH_FACTOR_RECEPTOR_BINDING		20	0.544989	1.48464	0.0526316	0.141089	1	1954	tags=40%, list=25%, signal=53%
GOMF_FAD_BINDING	GOMF_FAD_BINDING		27	0.497948	1.48241	0.0465839	0.141189	1	1363	tags=48%, list=17%, signal=58%
GOMF_COPPER_ION_BINDING	GOMF_COPPER_ION_BINDING		24	0.528835	1.47992	0.0457317	0.14152	1	671	tags=42%, list=8%, signal=45%
GOMF_ATPASE_COUPLED_ION_TRANSMEMBRANE_TRANSPORTER_ACTIVITY	GOMF_ATPASE_COUPLED_ION_TRANSMEMBRANE_TRANSPORTER_ACTIVITY		20	0.542859	1.47898	0.0376766	0.140446	1	1936	tags=50%, list=24%, signal=66%
GOMF_L_AMINO_ACID_TRANSMEMBRANE_TRANSPORTER_ACTIVITY	GOMF_L_AMINO_ACID_TRANSMEMBRANE_TRANSPORTER_ACTIVITY		17	0.555861	1.46933	0.0633914	0.149438	1	2161	tags=65%, list=27%, signal=89%
GOMF_OXIDOREDUCTASE_ACTIVITY_ACTING_ON_CH_OH_GROUP_OF_DONORS	GOMF_OXIDOREDUCTASE_ACTIVITY_ACTING_ON_CH_OH_GROUP_OF_DONORS		84	0.401972	1.46583	0.0192837	0.151218	1	1440	tags=37%, list=18%, signal=45%
GOMF_IRON_ION_BINDING	GOMF_IRON_ION_BINDING		61	0.42286	1.46152	0.0316092	0.154226	1	937	tags=33%, list=12%, signal=37%
GOMF_PHOSPHATIDYLINOSITOL_4_5_BISPHOSPHATE_BINDING	GOMF_PHOSPHATIDYLINOSITOL_4_5_BISPHOSPHATE_BINDING		39	0.461409	1.46024	0.0373692	0.153423	1	1626	tags=41%, list=20%, signal=51%
GOMF_EXTRACELLULAR_MATRIX_BINDING	GOMF_EXTRACELLULAR_MATRIX_BINDING		25	0.511716	1.45403	0.06	0.158681	1	793	tags=28%, list=10%, signal=31%
GOMF_CARBOHYDRATE_DERIVATIVE_TRANSMEMBRANE_TRANSPORTER_ACTIVITY	GOMF_CARBOHYDRATE_DERIVATIVE_TRANSMEMBRANE_TRANSPORTER_ACTIVITY		18	0.535806	1.44614	0.0571429	0.165565	1	1707	tags=39%, list=21%, signal=49%
GOMF_2_OXOGLUTARATE_DEPENDENT_DIOXYGENASE_ACTIVITY	GOMF_2_OXOGLUTARATE_DEPENDENT_DIOXYGENASE_ACTIVITY		30	0.480291	1.44368	0.0695518	0.165954	1	1047	tags=33%, list=13%, signal=38%
GOMF_HYDRO_LYASE_ACTIVITY	GOMF_HYDRO_LYASE_ACTIVITY		42	0.451096	1.4413	0.0480481	0.166517	1	1854	tags=45%, list=23%, signal=59%
GOMF_ACETYLGLUCOSAMINYLTRANSFERASE_ACTIVITY	GOMF_ACETYLGLUCOSAMINYLTRANSFERASE_ACTIVITY		20	0.540986	1.44112	0.0519878	0.16442	1	2101	tags=60%, list=26%, signal=81%
GOMF_GUANYL_NUCLEOTIDE_BINDING	GOMF_GUANYL_NUCLEOTIDE_BINDING		226	0.349256	1.43251	0.00712589	0.172426	1	2080	tags=36%, list=26%, signal=48%
GOMF_TRANSMEMBRANE_RECEPTOR_PROTEIN_KINASE_ACTIVITY	GOMF_TRANSMEMBRANE_RECEPTOR_PROTEIN_KINASE_ACTIVITY		28	0.486203	1.43171	0.0563166	0.171003	1	2177	tags=50%, list=27%, signal=69%
GOMF_OXIDOREDUCTASE_ACTIVITY	GOMF_OXIDOREDUCTASE_ACTIVITY		439	0.331925	1.42838	0.0010846	0.17304	1	1082	tags=23%, list=14%, signal=25%
GOMF_HYDROLASE_ACTIVITY_HYDROLYZING_O_GLYCOSYL_COMPOUNDS	GOMF_HYDROLASE_ACTIVITY_HYDROLYZING_O_GLYCOSYL_COMPOUNDS		44	0.443887	1.42621	0.0478261	0.173574	1	1527	tags=39%, list=19%, signal=48%
GOMF_METALLOEXOPEPTIDASE_ACTIVITY	GOMF_METALLOEXOPEPTIDASE_ACTIVITY		25	0.491687	1.42538	0.05919	0.172378	1	852	tags=24%, list=11%, signal=27%
GOMF_EXOPEPTIDASE_ACTIVITY	GOMF_EXOPEPTIDASE_ACTIVITY		47	0.430811	1.42037	0.0416667	0.176611	1	1047	tags=23%, list=13%, signal=27%
GOMF_ACTIN_FILAMENT_BINDING	GOMF_ACTIN_FILAMENT_BINDING		134	0.365686	1.41912	0.0178117	0.175766	1	1683	tags=31%, list=21%, signal=39%
GOMF_SERINE_HYDROLASE_ACTIVITY	GOMF_SERINE_HYDROLASE_ACTIVITY		45	0.434471	1.41663	0.045911	0.176835	1	1410	tags=31%, list=18%, signal=38%
GOMF_CARBOXYLIC_ESTER_HYDROLASE_ACTIVITY	GOMF_CARBOXYLIC_ESTER_HYDROLASE_ACTIVITY		64	0.408852	1.40945	0.0454545	0.184006	1	1704	tags=39%, list=21%, signal=49%
GOMF_PHOSPHOLIPASE_ACTIVITY	GOMF_PHOSPHOLIPASE_ACTIVITY		39	0.437295	1.40865	0.0587349	0.18257	1	2424	tags=56%, list=30%, signal=81%
GOMF_SOLUTE_CATION_SYMPORTER_ACTIVITY	GOMF_SOLUTE_CATION_SYMPORTER_ACTIVITY		24	0.488135	1.40728	0.0751174	0.182164	1	2090	tags=54%, list=26%, signal=73%
GOMF_CALCIUM_ION_TRANSMEMBRANE_TRANSPORTER_ACTIVITY	GOMF_CALCIUM_ION_TRANSMEMBRANE_TRANSPORTER_ACTIVITY		34	0.452824	1.40623	0.0634441	0.181252	1	2359	tags=68%, list=30%, signal=96%
GOMF_CARGO_RECEPTOR_ACTIVITY	GOMF_CARGO_RECEPTOR_ACTIVITY		17	0.531023	1.4043	0.0901899	0.181603	1	233	tags=24%, list=3%, signal=24%
GOMF_POTASSIUM_ION_TRANSMEMBRANE_TRANSPORTER_ACTIVITY	GOMF_POTASSIUM_ION_TRANSMEMBRANE_TRANSPORTER_ACTIVITY		17	0.53267	1.3958	0.0960912	0.190467	1	1250	tags=53%, list=16%, signal=63%
GOMF_STEROID_BINDING	GOMF_STEROID_BINDING		38	0.443366	1.39169	0.0688073	0.193555	1	1886	tags=47%, list=24%, signal=62%
GOMF_ACTIN_DEPENDENT_ATPASE_ACTIVITY	GOMF_ACTIN_DEPENDENT_ATPASE_ACTIVITY		17	0.527792	1.38814	0.110749	0.196044	1	1135	tags=35%, list=14%, signal=41%
GOMF_PROTEIN_DEMETHYLASE_ACTIVITY	GOMF_PROTEIN_DEMETHYLASE_ACTIVITY		21	0.504486	1.38787	0.0688	0.194242	1	1516	tags=43%, list=19%, signal=53%
GOMF_SULFUR_COMPOUND_TRANSMEMBRANE_TRANSPORTER_ACTIVITY	GOMF_SULFUR_COMPOUND_TRANSMEMBRANE_TRANSPORTER_ACTIVITY		18	0.517539	1.38572	0.106557	0.194654	1	1952	tags=44%, list=25%, signal=59%
GOMF_LIPASE_ACTIVITY	GOMF_LIPASE_ACTIVITY		48	0.419946	1.38215	0.0671533	0.197243	1	2424	tags=56%, list=30%, signal=80%
GOMF_TRANSMEMBRANE_RECEPTOR_PROTEIN_TYROSINE_KINASE_ACTIVITY	GOMF_TRANSMEMBRANE_RECEPTOR_PROTEIN_TYROSINE_KINASE_ACTIVITY		24	0.483369	1.37908	0.0919003	0.199033	1	2177	tags=54%, list=27%, signal=74%
GOMF_CALCIUM_DEPENDENT_PHOSPHOLIPID_BINDING	GOMF_CALCIUM_DEPENDENT_PHOSPHOLIPID_BINDING		22	0.504761	1.37887	0.0868878	0.197151	1	1041	tags=32%, list=13%, signal=36%
GOMF_G_PROTEIN_COUPLED_RECEPTOR_ACTIVITY	GOMF_G_PROTEIN_COUPLED_RECEPTOR_ACTIVITY		28	0.466936	1.37349	0.0977099	0.202644	1	2401	tags=46%, list=30%, signal=66%
GOMF_PHOSPHATIDYLINOSITOL_PHOSPHATE_BINDING	GOMF_PHOSPHATIDYLINOSITOL_PHOSPHATE_BINDING		104	0.364357	1.36639	0.041779	0.209802	1	1798	tags=35%, list=23%, signal=44%
GOMF_PROTEIN_DISULFIDE_ISOMERASE_ACTIVITY	GOMF_PROTEIN_DISULFIDE_ISOMERASE_ACTIVITY		15	0.548065	1.36632	0.10311	0.207797	1	1839	tags=47%, list=23%, signal=61%
GOMF_PROTEASE_BINDING	GOMF_PROTEASE_BINDING		73	0.378144	1.34989	0.0635135	0.228954	1	2217	tags=45%, list=28%, signal=62%
GOMF_OXIDOREDUCTASE_ACTIVITY_ACTING_ON_PAIRED_DONORS_WITH_INCORPORATION_OR_REDUCTION_OF_MOLECULAR_OXYGEN_NAD_P_H_AS_ONE_DONOR_AND_INCORPORATION_OF_ONE_ATOM_OF_OXYGEN	GOMF_OXIDOREDUCTASE_ACTIVITY_ACTING_ON_PAIRED_DONORS_WITH_INCORPORATION_OR_REDUCTION_OF_MOLECULAR_OXYGEN_NAD_P_H_AS_ONE_DONOR_AND_INCORPORATION_OF_ONE_ATOM_OF_OXYGEN		19	0.499829	1.34979	0.0923567	0.226744	1	984	tags=53%, list=12%, signal=60%
GOMF_PHOSPHATIDIC_ACID_BINDING	GOMF_PHOSPHATIDIC_ACID_BINDING		16	0.517355	1.33947	0.117363	0.240125	1	1898	tags=63%, list=24%, signal=82%
GOMF_SODIUM_ION_TRANSMEMBRANE_TRANSPORTER_ACTIVITY	GOMF_SODIUM_ION_TRANSMEMBRANE_TRANSPORTER_ACTIVITY		25	0.467235	1.33585	0.103668	0.243227	1	1242	tags=32%, list=16%, signal=38%
GOMF_CYSTEINE_TYPE_ENDOPEPTIDASE_REGULATOR_ACTIVITY_INVOLVED_IN_APOPTOTIC_PROCESS	GOMF_CYSTEINE_TYPE_ENDOPEPTIDASE_REGULATOR_ACTIVITY_INVOLVED_IN_APOPTOTIC_PROCESS		24	0.461346	1.31842	0.123794	0.268296	1	1390	tags=29%, list=17%, signal=35%
GOMF_FLAVIN_ADENINE_DINUCLEOTIDE_BINDING	GOMF_FLAVIN_ADENINE_DINUCLEOTIDE_BINDING		61	0.379307	1.31648	0.0961003	0.26869	1	1020	tags=33%, list=13%, signal=37%
GOMF_ORGANOPHOSPHATE_ESTER_TRANSMEMBRANE_TRANSPORTER_ACTIVITY	GOMF_ORGANOPHOSPHATE_ESTER_TRANSMEMBRANE_TRANSPORTER_ACTIVITY		17	0.49875	1.31147	0.146302	0.274043	1	1707	tags=35%, list=21%, signal=45%
GOMF_ACTIN_BINDING	GOMF_ACTIN_BINDING		248	0.314819	1.30903	0.0276442	0.275363	1	1975	tags=33%, list=25%, signal=43%
GOMF_PHOSPHATIDYLINOSITOL_3_4_BISPHOSPHATE_BINDING	GOMF_PHOSPHATIDYLINOSITOL_3_4_BISPHOSPHATE_BINDING		18	0.481149	1.30609	0.149278	0.277182	1	1591	tags=44%, list=20%, signal=55%
GOMF_CALCIUM_ION_BINDING	GOMF_CALCIUM_ION_BINDING		216	0.322174	1.30473	0.0276442	0.277032	1	1904	tags=35%, list=24%, signal=44%
GOMF_VOLTAGE_GATED_ION_CHANNEL_ACTIVITY	GOMF_VOLTAGE_GATED_ION_CHANNEL_ACTIVITY		28	0.435778	1.30358	0.165877	0.276599	1	1061	tags=39%, list=13%, signal=45%
GOMF_PDZ_DOMAIN_BINDING	GOMF_PDZ_DOMAIN_BINDING		42	0.401919	1.30008	0.0979827	0.279912	1	1331	tags=29%, list=17%, signal=34%
GOMF_PROTEIN_SELF_ASSOCIATION	GOMF_PROTEIN_SELF_ASSOCIATION		29	0.431415	1.29931	0.132716	0.278569	1	1685	tags=28%, list=21%, signal=35%
GOMF_PHOSPHATIDYLINOSITOL_3_KINASE_BINDING	GOMF_PHOSPHATIDYLINOSITOL_3_KINASE_BINDING		17	0.483541	1.28064	0.176661	0.308463	1	1242	tags=35%, list=16%, signal=42%
GOMF_AMIDE_TRANSMEMBRANE_TRANSPORTER_ACTIVITY	GOMF_AMIDE_TRANSMEMBRANE_TRANSPORTER_ACTIVITY		27	0.435236	1.27517	0.154434	0.315715	1	2451	tags=44%, list=31%, signal=64%
GOMF_INTEGRIN_BINDING	GOMF_INTEGRIN_BINDING		63	0.364743	1.25777	0.122881	0.347089	1	1877	tags=41%, list=24%, signal=54%
GOMF_GTPASE_ACTIVATOR_ACTIVITY	GOMF_GTPASE_ACTIVATOR_ACTIVITY		165	0.314769	1.25301	0.0765306	0.353454	1	2556	tags=42%, list=32%, signal=60%
GOMF_CLATHRIN_BINDING	GOMF_CLATHRIN_BINDING		35	0.408776	1.25191	0.152174	0.35244	1	2212	tags=43%, list=28%, signal=59%
GOMF_QUATERNARY_AMMONIUM_GROUP_BINDING	GOMF_QUATERNARY_AMMONIUM_GROUP_BINDING		16	0.48305	1.24428	0.198708	0.364414	1	1886	tags=50%, list=24%, signal=65%
GOMF_DEAMINASE_ACTIVITY	GOMF_DEAMINASE_ACTIVITY		15	0.483688	1.23279	0.216129	0.384993	1	2813	tags=60%, list=35%, signal=93%
GOMF_TRANSFERASE_ACTIVITY_TRANSFERRING_ACYL_GROUPS	GOMF_TRANSFERASE_ACTIVITY_TRANSFERRING_ACYL_GROUPS		125	0.320609	1.23219	0.130952	0.382996	1	1794	tags=29%, list=23%, signal=37%
GOMF_MICROFILAMENT_MOTOR_ACTIVITY	GOMF_MICROFILAMENT_MOTOR_ACTIVITY		18	0.458422	1.23195	0.207856	0.380243	1	1135	tags=33%, list=14%, signal=39%
GOMF_E_BOX_BINDING	GOMF_E_BOX_BINDING		17	0.461999	1.22896	0.219355	0.38332	1	502	tags=18%, list=6%, signal=19%
GOMF_L_ASCORBIC_ACID_BINDING	GOMF_L_ASCORBIC_ACID_BINDING		15	0.474711	1.22642	0.197492	0.385219	1	1513	tags=40%, list=19%, signal=49%
GOMF_ORGANIC_ACID_BINDING	GOMF_ORGANIC_ACID_BINDING		44	0.376805	1.22505	0.166909	0.384694	1	1707	tags=34%, list=21%, signal=43%
GOMF_EXOGENOUS_PROTEIN_BINDING	GOMF_EXOGENOUS_PROTEIN_BINDING		40	0.381288	1.22174	0.168437	0.38836	1	1856	tags=45%, list=23%, signal=58%
GOMF_14_3_3_PROTEIN_BINDING	GOMF_14_3_3_PROTEIN_BINDING		25	0.418615	1.21276	0.210611	0.404005	1	1986	tags=36%, list=25%, signal=48%
GOMF_STRUCTURAL_CONSTITUENT_OF_CYTOSKELETON	GOMF_STRUCTURAL_CONSTITUENT_OF_CYTOSKELETON		52	0.364731	1.20849	0.180516	0.409961	1	2095	tags=38%, list=26%, signal=52%
GOMF_SPHINGOLIPID_BINDING	GOMF_SPHINGOLIPID_BINDING		15	0.470372	1.20583	0.233169	0.412047	1	1914	tags=53%, list=24%, signal=70%
GOMF_SH3_DOMAIN_BINDING	GOMF_SH3_DOMAIN_BINDING		75	0.339266	1.20174	0.16318	0.417741	1	1340	tags=23%, list=17%, signal=27%
GOMF_SCAFFOLD_PROTEIN_BINDING	GOMF_SCAFFOLD_PROTEIN_BINDING		29	0.40795	1.20056	0.215038	0.416903	1	1204	tags=17%, list=15%, signal=20%
GOMF_ANTIPORTER_ACTIVITY	GOMF_ANTIPORTER_ACTIVITY		27	0.406019	1.19823	0.230183	0.41878	1	2815	tags=48%, list=35%, signal=74%
GOMF_CHANNEL_INHIBITOR_ACTIVITY	GOMF_CHANNEL_INHIBITOR_ACTIVITY		20	0.440322	1.19749	0.216995	0.417037	1	1722	tags=40%, list=22%, signal=51%
GOMF_GUANYL_NUCLEOTIDE_EXCHANGE_FACTOR_ACTIVITY	GOMF_GUANYL_NUCLEOTIDE_EXCHANGE_FACTOR_ACTIVITY		117	0.309272	1.19449	0.154653	0.420225	1	2388	tags=37%, list=30%, signal=52%
GOMF_SYNTAXIN_BINDING	GOMF_SYNTAXIN_BINDING		42	0.36434	1.18507	0.215152	0.437478	1	2313	tags=38%, list=29%, signal=53%
GOMF_VITAMIN_BINDING	GOMF_VITAMIN_BINDING		77	0.330996	1.18216	0.184066	0.440864	1	1707	tags=34%, list=21%, signal=43%
GOMF_CARBOHYDRATE_KINASE_ACTIVITY	GOMF_CARBOHYDRATE_KINASE_ACTIVITY		18	0.45337	1.17711	0.239024	0.449143	1	2289	tags=50%, list=29%, signal=70%
GOMF_CELL_ADHESION_MOLECULE_BINDING	GOMF_CELL_ADHESION_MOLECULE_BINDING		359	0.273954	1.17267	0.11274	0.455901	1	1962	tags=28%, list=25%, signal=36%
GOMF_CHANNEL_REGULATOR_ACTIVITY	GOMF_CHANNEL_REGULATOR_ACTIVITY		48	0.351075	1.17194	0.208145	0.454191	1	1722	tags=40%, list=22%, signal=50%
GOMF_SERINE_TYPE_ENDOPEPTIDASE_INHIBITOR_ACTIVITY	GOMF_SERINE_TYPE_ENDOPEPTIDASE_INHIBITOR_ACTIVITY		27	0.397559	1.16404	0.25	0.468717	1	1670	tags=37%, list=21%, signal=47%
GOMF_CYSTEINE_TYPE_ENDOPEPTIDASE_INHIBITOR_ACTIVITY	GOMF_CYSTEINE_TYPE_ENDOPEPTIDASE_INHIBITOR_ACTIVITY		19	0.427777	1.16044	0.274168	0.473458	1	1390	tags=26%, list=17%, signal=32%
GOMF_SPECTRIN_BINDING	GOMF_SPECTRIN_BINDING		17	0.437038	1.15703	0.291798	0.477783	1	2605	tags=53%, list=33%, signal=78%
GOMF_OXIDOREDUCTASE_ACTIVITY_ACTING_ON_THE_CH_NH_GROUP_OF_DONORS	GOMF_OXIDOREDUCTASE_ACTIVITY_ACTING_ON_THE_CH_NH_GROUP_OF_DONORS		19	0.420804	1.15629	0.278135	0.475963	1	875	tags=21%, list=11%, signal=24%
GOMF_PROTEOGLYCAN_BINDING	GOMF_PROTEOGLYCAN_BINDING		15	0.45873	1.15513	0.298188	0.475338	1	858	tags=27%, list=11%, signal=30%
GOMF_NUCLEOTIDE_TRANSMEMBRANE_TRANSPORTER_ACTIVITY	GOMF_NUCLEOTIDE_TRANSMEMBRANE_TRANSPORTER_ACTIVITY		15	0.45309	1.15334	0.297806	0.475981	1	1707	tags=33%, list=21%, signal=42%
GOMF_STRUCTURAL_CONSTITUENT_OF_MUSCLE	GOMF_STRUCTURAL_CONSTITUENT_OF_MUSCLE		15	0.447691	1.15175	0.286385	0.47644	1	1908	tags=40%, list=24%, signal=52%
GOMF_METALLOPEPTIDASE_ACTIVITY	GOMF_METALLOPEPTIDASE_ACTIVITY		60	0.33228	1.15122	0.234532	0.474266	1	852	tags=17%, list=11%, signal=19%
GOMF_METALLOENDOPEPTIDASE_ACTIVITY	GOMF_METALLOENDOPEPTIDASE_ACTIVITY		27	0.387482	1.14935	0.27786	0.47512	1	599	tags=19%, list=8%, signal=20%
GOMF_TRANSLATION_REPRESSOR_ACTIVITY	GOMF_TRANSLATION_REPRESSOR_ACTIVITY		15	0.450107	1.1482	0.290584	0.47458	1	0	tags=7%, list=0%, signal=7%
GOMF_G_PROTEIN_COUPLED_RECEPTOR_BINDING	GOMF_G_PROTEIN_COUPLED_RECEPTOR_BINDING		76	0.320374	1.14059	0.241135	0.488573	1	1961	tags=34%, list=25%, signal=45%
GOMF_MYOSIN_BINDING	GOMF_MYOSIN_BINDING		38	0.359762	1.13666	0.279586	0.494857	1	2772	tags=61%, list=35%, signal=92%
GOMF_ION_CHANNEL_REGULATOR_ACTIVITY	GOMF_ION_CHANNEL_REGULATOR_ACTIVITY		40	0.360889	1.13513	0.276119	0.495104	1	1722	tags=43%, list=22%, signal=54%
GOMF_PEPTIDASE_REGULATOR_ACTIVITY	GOMF_PEPTIDASE_REGULATOR_ACTIVITY		86	0.313295	1.1314	0.25	0.50054	1	1429	tags=22%, list=18%, signal=27%
GOMF_IMMUNE_RECEPTOR_ACTIVITY	GOMF_IMMUNE_RECEPTOR_ACTIVITY		19	0.411803	1.12642	0.29654	0.508479	1	351	tags=26%, list=4%, signal=27%
GOMF_KINASE_ACTIVITY	GOMF_KINASE_ACTIVITY		430	0.259844	1.12576	0.157489	0.506816	1	2299	tags=31%, list=29%, signal=41%
GOMF_PHOSPHATASE_ACTIVITY	GOMF_PHOSPHATASE_ACTIVITY		153	0.285304	1.11633	0.233668	0.525923	1	1846	tags=29%, list=23%, signal=37%
GOMF_NUCLEOBASE_CONTAINING_COMPOUND_TRANSMEMBRANE_TRANSPORTER_ACTIVITY	GOMF_NUCLEOBASE_CONTAINING_COMPOUND_TRANSMEMBRANE_TRANSPORTER_ACTIVITY		19	0.412892	1.10649	0.35935	0.546352	1	3203	tags=58%, list=40%, signal=97%
GOMF_PHOSPHATIDYLINOSITOL_3_PHOSPHATE_BINDING	GOMF_PHOSPHATIDYLINOSITOL_3_PHOSPHATE_BINDING		28	0.374826	1.10592	0.302548	0.544424	1	2119	tags=43%, list=27%, signal=58%
GOMF_TAU_PROTEIN_KINASE_ACTIVITY	GOMF_TAU_PROTEIN_KINASE_ACTIVITY		15	0.431541	1.10114	0.3344	0.55218	1	873	tags=20%, list=11%, signal=22%
GOMF_STRUCTURAL_MOLECULE_ACTIVITY	GOMF_STRUCTURAL_MOLECULE_ACTIVITY		319	0.258132	1.0952	0.259259	0.563374	1	2154	tags=28%, list=27%, signal=36%
GOMF_ENDOPEPTIDASE_REGULATOR_ACTIVITY	GOMF_ENDOPEPTIDASE_REGULATOR_ACTIVITY		65	0.312633	1.09303	0.314735	0.565294	1	1429	tags=23%, list=18%, signal=28%
GOMF_HISTONE_ACETYLTRANSFERASE_BINDING	GOMF_HISTONE_ACETYLTRANSFERASE_BINDING		17	0.414873	1.08988	0.360331	0.569224	1	208	tags=12%, list=3%, signal=12%
GOMF_HYDROLASE_ACTIVITY_ACTING_ON_GLYCOSYL_BONDS	GOMF_HYDROLASE_ACTIVITY_ACTING_ON_GLYCOSYL_BONDS		57	0.314907	1.08581	0.341772	0.575663	1	1527	tags=33%, list=19%, signal=41%
GOMF_PHOSPHOPROTEIN_PHOSPHATASE_ACTIVITY	GOMF_PHOSPHOPROTEIN_PHOSPHATASE_ACTIVITY		91	0.294597	1.07981	0.334243	0.587275	1	1465	tags=23%, list=18%, signal=28%
GOMF_GAMMA_TUBULIN_BINDING	GOMF_GAMMA_TUBULIN_BINDING		17	0.409614	1.07883	0.347245	0.586004	1	1274	tags=35%, list=16%, signal=42%
GOMF_NAD_BINDING	GOMF_NAD_BINDING		44	0.331469	1.07322	0.331845	0.596095	1	2004	tags=34%, list=25%, signal=45%
GOMF_PROTEIN_KINASE_ACTIVITY	GOMF_PROTEIN_KINASE_ACTIVITY		315	0.255651	1.07211	0.289988	0.59522	1	2299	tags=29%, list=29%, signal=39%
GOMF_PROTEIN_HETERODIMERIZATION_ACTIVITY	GOMF_PROTEIN_HETERODIMERIZATION_ACTIVITY		135	0.274497	1.07035	0.313548	0.595813	1	1647	tags=23%, list=21%, signal=28%
GOMF_DIOXYGENASE_ACTIVITY	GOMF_DIOXYGENASE_ACTIVITY		53	0.320364	1.06944	0.369099	0.594508	1	1047	tags=26%, list=13%, signal=30%
GOMF_NUCLEOBASE_CONTAINING_COMPOUND_KINASE_ACTIVITY	GOMF_NUCLEOBASE_CONTAINING_COMPOUND_KINASE_ACTIVITY		29	0.367436	1.06625	0.372727	0.598972	1	2550	tags=52%, list=32%, signal=76%
GOMF_OXIDOREDUCTASE_ACTIVITY_ACTING_ON_A_SULFUR_GROUP_OF_DONORS	GOMF_OXIDOREDUCTASE_ACTIVITY_ACTING_ON_A_SULFUR_GROUP_OF_DONORS		48	0.325159	1.0656	0.368723	0.59711	1	2125	tags=38%, list=27%, signal=51%
GOMF_CARBON_OXYGEN_LYASE_ACTIVITY	GOMF_CARBON_OXYGEN_LYASE_ACTIVITY		50	0.318757	1.06508	0.352192	0.594858	1	1854	tags=40%, list=23%, signal=52%
GOMF_MONOCARBOXYLIC_ACID_TRANSMEMBRANE_TRANSPORTER_ACTIVITY	GOMF_MONOCARBOXYLIC_ACID_TRANSMEMBRANE_TRANSPORTER_ACTIVITY		16	0.414446	1.0649	0.392628	0.591798	1	2063	tags=56%, list=26%, signal=76%
GOMF_CALMODULIN_BINDING	GOMF_CALMODULIN_BINDING		88	0.294298	1.0645	0.338419	0.589229	1	1724	tags=28%, list=22%, signal=36%
GOMF_SNARE_BINDING	GOMF_SNARE_BINDING		65	0.305032	1.06249	0.354108	0.590521	1	2197	tags=31%, list=28%, signal=42%
GOMF_PHOSPHATIDYLINOSITOL_4_PHOSPHATE_BINDING	GOMF_PHOSPHATIDYLINOSITOL_4_PHOSPHATE_BINDING		20	0.389728	1.05427	0.397035	0.606975	1	1591	tags=25%, list=20%, signal=31%
GOMF_PROTEIN_C_TERMINUS_BINDING	GOMF_PROTEIN_C_TERMINUS_BINDING		130	0.275575	1.05265	0.36803	0.607538	1	1685	tags=22%, list=21%, signal=28%
GOMF_LYASE_ACTIVITY	GOMF_LYASE_ACTIVITY		111	0.280042	1.05049	0.380519	0.609191	1	1773	tags=32%, list=22%, signal=41%
GOMF_PHOSPHORIC_ESTER_HYDROLASE_ACTIVITY	GOMF_PHOSPHORIC_ESTER_HYDROLASE_ACTIVITY		188	0.259393	1.04657	0.376225	0.615098	1	1898	tags=29%, list=24%, signal=37%
GOMF_CALCIUM_DEPENDENT_PROTEIN_BINDING	GOMF_CALCIUM_DEPENDENT_PROTEIN_BINDING		31	0.343264	1.04452	0.399696	0.616842	1	632	tags=23%, list=8%, signal=24%
GOMF_STEROID_DEHYDROGENASE_ACTIVITY	GOMF_STEROID_DEHYDROGENASE_ACTIVITY		15	0.407674	1.03877	0.421474	0.627619	1	568	tags=27%, list=7%, signal=29%
GOMF_DEMETHYLASE_ACTIVITY	GOMF_DEMETHYLASE_ACTIVITY		27	0.362637	1.03718	0.419162	0.627877	1	1516	tags=33%, list=19%, signal=41%
GOMF_PROTEIN_TYROSINE_KINASE_BINDING	GOMF_PROTEIN_TYROSINE_KINASE_BINDING		43	0.321406	1.03563	0.410795	0.628117	1	731	tags=16%, list=9%, signal=18%
GOMF_PROTEIN_SERINE_PHOSPHATASE_ACTIVITY	GOMF_PROTEIN_SERINE_PHOSPHATASE_ACTIVITY		35	0.33147	1.02214	0.41716	0.657802	1	1465	tags=26%, list=18%, signal=31%
GOMF_KINASE_BINDING	GOMF_KINASE_BINDING		444	0.235405	1.01996	0.425579	0.659747	1	1728	tags=21%, list=22%, signal=25%
GOMF_METALLOAMINOPEPTIDASE_ACTIVITY	GOMF_METALLOAMINOPEPTIDASE_ACTIVITY		19	0.371269	1.01625	0.440705	0.66513	1	852	tags=21%, list=11%, signal=24%
GOMF_RECEPTOR_TYROSINE_KINASE_BINDING	GOMF_RECEPTOR_TYROSINE_KINASE_BINDING		34	0.323009	1.01016	0.434109	0.676093	1	556	tags=15%, list=7%, signal=16%
GOMF_ENDOPEPTIDASE_ACTIVITY	GOMF_ENDOPEPTIDASE_ACTIVITY		147	0.259153	1.00928	0.455233	0.674467	1	658	tags=12%, list=8%, signal=13%
GOMF_PEPTIDE_TRANSMEMBRANE_TRANSPORTER_ACTIVITY	GOMF_PEPTIDE_TRANSMEMBRANE_TRANSPORTER_ACTIVITY		19	0.382269	1.00497	0.476575	0.681744	1	686	tags=16%, list=9%, signal=17%
GOMF_ENZYME_ACTIVATOR_ACTIVITY	GOMF_ENZYME_ACTIVATOR_ACTIVITY		313	0.237395	0.998401	0.46538	0.69417	1	2479	tags=35%, list=31%, signal=49%
GOMF_PROTON_TRANSMEMBRANE_TRANSPORTER_ACTIVITY	GOMF_PROTON_TRANSMEMBRANE_TRANSPORTER_ACTIVITY		51	0.29841	0.998372	0.465616	0.690515	1	2480	tags=47%, list=31%, signal=68%
GOMF_TRANSFERASE_ACTIVITY_TRANSFERRING_ALKYL_OR_ARYL_OTHER_THAN_METHYL_GROUPS	GOMF_TRANSFERASE_ACTIVITY_TRANSFERRING_ALKYL_OR_ARYL_OTHER_THAN_METHYL_GROUPS		39	0.311586	0.992102	0.488439	0.702419	1	1206	tags=21%, list=15%, signal=24%
GOMF_TRANSFERASE_ACTIVITY_TRANSFERRING_SULFUR_CONTAINING_GROUPS	GOMF_TRANSFERASE_ACTIVITY_TRANSFERRING_SULFUR_CONTAINING_GROUPS		25	0.345266	0.990417	0.465378	0.702517	1	1884	tags=36%, list=24%, signal=47%
GOMF_PHOSPHATIDYLINOSITOL_3_4_5_TRISPHOSPHATE_BINDING	GOMF_PHOSPHATIDYLINOSITOL_3_4_5_TRISPHOSPHATE_BINDING		27	0.335201	0.975942	0.49313	0.734476	1	1567	tags=30%, list=20%, signal=37%
GOMF_PROTEIN_DISULFIDE_OXIDOREDUCTASE_ACTIVITY	GOMF_PROTEIN_DISULFIDE_OXIDOREDUCTASE_ACTIVITY		15	0.375199	0.972887	0.517241	0.738455	1	748	tags=27%, list=9%, signal=29%
GOMF_GTPASE_BINDING	GOMF_GTPASE_BINDING		160	0.243236	0.967289	0.543506	0.748407	1	2563	tags=39%, list=32%, signal=56%
GOMF_INSULIN_LIKE_GROWTH_FACTOR_BINDING	GOMF_INSULIN_LIKE_GROWTH_FACTOR_BINDING		16	0.374833	0.964921	0.52057	0.750703	1	1990	tags=50%, list=25%, signal=67%
GOMF_GROWTH_FACTOR_BINDING	GOMF_GROWTH_FACTOR_BINDING		56	0.285201	0.964428	0.520509	0.747978	1	1990	tags=36%, list=25%, signal=47%
GOMF_HYDROLASE_ACTIVITY_ACTING_ON_ESTER_BONDS	GOMF_HYDROLASE_ACTIVITY_ACTING_ON_ESTER_BONDS		401	0.224399	0.963556	0.58674	0.746334	1	1756	tags=24%, list=22%, signal=30%
GOMF_CARBOXYLIC_ACID_BINDING	GOMF_CARBOXYLIC_ACID_BINDING		74	0.271228	0.962206	0.533239	0.745873	1	1707	tags=32%, list=21%, signal=41%
GOMF_LIGASE_ACTIVITY	GOMF_LIGASE_ACTIVITY		124	0.247662	0.955148	0.555411	0.759699	1	1745	tags=28%, list=22%, signal=36%
GOMF_HORMONE_BINDING	GOMF_HORMONE_BINDING		22	0.340372	0.951714	0.529968	0.764266	1	1935	tags=41%, list=24%, signal=54%
GOMF_KINASE_ACTIVATOR_ACTIVITY	GOMF_KINASE_ACTIVATOR_ACTIVITY		48	0.290183	0.950471	0.534508	0.763414	1	2399	tags=35%, list=30%, signal=50%
GOMF_CALCIUM_CHANNEL_REGULATOR_ACTIVITY	GOMF_CALCIUM_CHANNEL_REGULATOR_ACTIVITY		15	0.378049	0.946846	0.536	0.768484	1	1722	tags=60%, list=22%, signal=76%
GOMF_ION_CHANNEL_BINDING	GOMF_ION_CHANNEL_BINDING		57	0.277332	0.94541	0.554302	0.768297	1	1936	tags=33%, list=24%, signal=44%
GOMF_NUCLEOSIDE_TRIPHOSPHATASE_REGULATOR_ACTIVITY	GOMF_NUCLEOSIDE_TRIPHOSPHATASE_REGULATOR_ACTIVITY		309	0.221601	0.941517	0.624569	0.773795	1	2403	tags=34%, list=30%, signal=46%
GOMF_COLLAGEN_BINDING	GOMF_COLLAGEN_BINDING		30	0.314892	0.940977	0.550861	0.771236	1	1219	tags=27%, list=15%, signal=31%
GOMF_PHOSPHOTRANSFERASE_ACTIVITY_PHOSPHATE_GROUP_AS_ACCEPTOR	GOMF_PHOSPHOTRANSFERASE_ACTIVITY_PHOSPHATE_GROUP_AS_ACCEPTOR		27	0.318765	0.939147	0.541604	0.771712	1	2670	tags=56%, list=34%, signal=83%
GOMF_MITOGEN_ACTIVATED_PROTEIN_KINASE_BINDING	GOMF_MITOGEN_ACTIVATED_PROTEIN_KINASE_BINDING		23	0.333257	0.937528	0.539708	0.771721	1	1295	tags=17%, list=16%, signal=21%
GOMF_CYSTEINE_TYPE_ENDOPEPTIDASE_ACTIVITY	GOMF_CYSTEINE_TYPE_ENDOPEPTIDASE_ACTIVITY		63	0.272687	0.93666	0.594245	0.76999	1	658	tags=13%, list=8%, signal=14%
GOMF_AMYLOID_BETA_BINDING	GOMF_AMYLOID_BETA_BINDING		33	0.303286	0.932631	0.572496	0.775786	1	1370	tags=30%, list=17%, signal=36%
GOMF_GLYCOSAMINOGLYCAN_BINDING	GOMF_GLYCOSAMINOGLYCAN_BINDING		55	0.273562	0.925699	0.582744	0.788404	1	1067	tags=18%, list=13%, signal=21%
GOMF_CARBON_CARBON_LYASE_ACTIVITY	GOMF_CARBON_CARBON_LYASE_ACTIVITY		31	0.305628	0.924067	0.584592	0.788572	1	1539	tags=26%, list=19%, signal=32%
GOMF_PHOSPHOTYROSINE_RESIDUE_BINDING	GOMF_PHOSPHOTYROSINE_RESIDUE_BINDING		25	0.319302	0.91595	0.577465	0.803372	1	1586	tags=28%, list=20%, signal=35%
GOMF_STRUCTURAL_CONSTITUENT_OF_NUCLEAR_PORE	GOMF_STRUCTURAL_CONSTITUENT_OF_NUCLEAR_PORE		23	0.324012	0.9112	0.570093	0.810503	1	3524	tags=57%, list=44%, signal=101%
GOMF_THIOLESTER_HYDROLASE_ACTIVITY	GOMF_THIOLESTER_HYDROLASE_ACTIVITY		26	0.306762	0.901956	0.604396	0.827904	1	2241	tags=42%, list=28%, signal=59%
GOMF_SULFUR_COMPOUND_BINDING	GOMF_SULFUR_COMPOUND_BINDING		98	0.23924	0.89662	0.664393	0.836313	1	1067	tags=18%, list=13%, signal=21%
GOMF_PEPTIDASE_ACTIVITY	GOMF_PEPTIDASE_ACTIVITY		243	0.218005	0.89238	0.731183	0.842192	1	878	tags=12%, list=11%, signal=13%
GOMF_MONOSACCHARIDE_BINDING	GOMF_MONOSACCHARIDE_BINDING		38	0.284061	0.891817	0.627628	0.839573	1	1513	tags=26%, list=19%, signal=32%
GOMF_HYDROLASE_ACTIVITY_ACTING_ON_CARBON_NITROGEN_BUT_NOT_PEPTIDE_BONDS	GOMF_HYDROLASE_ACTIVITY_ACTING_ON_CARBON_NITROGEN_BUT_NOT_PEPTIDE_BONDS		55	0.262657	0.891541	0.651261	0.836296	1	1506	tags=24%, list=19%, signal=29%
GOMF_GLUTAMATE_RECEPTOR_BINDING	GOMF_GLUTAMATE_RECEPTOR_BINDING		17	0.342031	0.889777	0.615756	0.83628	1	2313	tags=53%, list=29%, signal=74%
GOMF_VITAMIN_B6_BINDING	GOMF_VITAMIN_B6_BINDING		31	0.293224	0.887858	0.626524	0.836551	1	1282	tags=26%, list=16%, signal=31%
GOMF_PROTEIN_MACROMOLECULE_ADAPTOR_ACTIVITY	GOMF_PROTEIN_MACROMOLECULE_ADAPTOR_ACTIVITY		173	0.221597	0.883912	0.736842	0.841568	1	2205	tags=29%, list=28%, signal=40%
GOMF_PROTEIN_DIMERIZATION_ACTIVITY	GOMF_PROTEIN_DIMERIZATION_ACTIVITY		480	0.201775	0.879365	0.812095	0.847472	1	1671	tags=21%, list=21%, signal=26%
GOMF_CYCLIN_DEPENDENT_PROTEIN_SERINE_THREONINE_KINASE_REGULATOR_ACTIVITY	GOMF_CYCLIN_DEPENDENT_PROTEIN_SERINE_THREONINE_KINASE_REGULATOR_ACTIVITY		24	0.30749	0.87816	0.629393	0.846122	1	1086	tags=25%, list=14%, signal=29%
GOMF_MANGANESE_ION_BINDING	GOMF_MANGANESE_ION_BINDING		39	0.271294	0.876725	0.669162	0.845357	1	897	tags=15%, list=11%, signal=17%
GOMF_CYTOKINE_RECEPTOR_BINDING	GOMF_CYTOKINE_RECEPTOR_BINDING		72	0.247468	0.873227	0.681502	0.849173	1	1217	tags=17%, list=15%, signal=19%
GOMF_PHOSPHATIDYLINOSITOL_PHOSPHATE_PHOSPHATASE_ACTIVITY	GOMF_PHOSPHATIDYLINOSITOL_PHOSPHATE_PHOSPHATASE_ACTIVITY		26	0.301379	0.867918	0.659056	0.856422	1	2778	tags=54%, list=35%, signal=82%
GOMF_HEPARIN_BINDING	GOMF_HEPARIN_BINDING		42	0.265502	0.860654	0.673913	0.867808	1	1067	tags=19%, list=13%, signal=22%
GOMF_PROTEIN_SERINE_THREONINE_KINASE_INHIBITOR_ACTIVITY	GOMF_PROTEIN_SERINE_THREONINE_KINASE_INHIBITOR_ACTIVITY		17	0.324446	0.860348	0.66876	0.864612	1	2607	tags=59%, list=33%, signal=87%
GOMF_INTRAMOLECULAR_OXIDOREDUCTASE_ACTIVITY	GOMF_INTRAMOLECULAR_OXIDOREDUCTASE_ACTIVITY		37	0.277311	0.859491	0.681048	0.862497	1	2076	tags=38%, list=26%, signal=51%
GOMF_PROTEIN_HOMODIMERIZATION_ACTIVITY	GOMF_PROTEIN_HOMODIMERIZATION_ACTIVITY		350	0.201916	0.85931	0.816327	0.859094	1	1534	tags=20%, list=19%, signal=24%
GOMF_MOLECULAR_ADAPTOR_ACTIVITY	GOMF_MOLECULAR_ADAPTOR_ACTIVITY		218	0.207044	0.85671	0.821557	0.860578	1	2173	tags=28%, list=27%, signal=37%
GOMF_METHYLATED_HISTONE_BINDING	GOMF_METHYLATED_HISTONE_BINDING		50	0.252352	0.843905	0.716763	0.882752	1	1630	tags=22%, list=20%, signal=27%
GOMF_PROTEIN_DOMAIN_SPECIFIC_BINDING	GOMF_PROTEIN_DOMAIN_SPECIFIC_BINDING		400	0.194093	0.826697	0.918436	0.911439	1	2391	tags=29%, list=30%, signal=40%
GOMF_PEPTIDASE_ACTIVATOR_ACTIVITY	GOMF_PEPTIDASE_ACTIVATOR_ACTIVITY		27	0.276145	0.823308	0.727975	0.913675	1	788	tags=11%, list=10%, signal=12%
GOMF_PROTEIN_TYROSINE_PHOSPHATASE_ACTIVITY	GOMF_PROTEIN_TYROSINE_PHOSPHATASE_ACTIVITY		48	0.253594	0.821519	0.747126	0.913208	1	1310	tags=19%, list=16%, signal=22%
GOMF_CYSTEINE_TYPE_PEPTIDASE_ACTIVITY	GOMF_CYSTEINE_TYPE_PEPTIDASE_ACTIVITY		99	0.21928	0.816528	0.822045	0.918954	1	658	tags=9%, list=8%, signal=10%
GOMF_ADENYLYLTRANSFERASE_ACTIVITY	GOMF_ADENYLYLTRANSFERASE_ACTIVITY		20	0.292451	0.814027	0.725458	0.919616	1	1314	tags=20%, list=16%, signal=24%
GOMF_MODIFICATION_DEPENDENT_PROTEIN_BINDING	GOMF_MODIFICATION_DEPENDENT_PROTEIN_BINDING		116	0.212778	0.812346	0.842177	0.918694	1	1694	tags=20%, list=21%, signal=25%
GOMF_PROTEIN_SERINE_THREONINE_PHOSPHATASE_ACTIVITY	GOMF_PROTEIN_SERINE_THREONINE_PHOSPHATASE_ACTIVITY		50	0.248547	0.812257	0.778902	0.914965	1	2549	tags=38%, list=32%, signal=56%
GOMF_BETA_TUBULIN_BINDING	GOMF_BETA_TUBULIN_BINDING		27	0.276959	0.798504	0.779661	0.934928	1	653	tags=15%, list=8%, signal=16%
GOMF_DNA_SECONDARY_STRUCTURE_BINDING	GOMF_DNA_SECONDARY_STRUCTURE_BINDING		28	0.269957	0.791839	0.77898	0.942079	1	277	tags=11%, list=3%, signal=11%
GOMF_MAP_KINASE_KINASE_KINASE_ACTIVITY	GOMF_MAP_KINASE_KINASE_KINASE_ACTIVITY		17	0.30246	0.790482	0.763547	0.940375	1	617	tags=12%, list=8%, signal=13%
GOMF_DISULFIDE_OXIDOREDUCTASE_ACTIVITY	GOMF_DISULFIDE_OXIDOREDUCTASE_ACTIVITY		32	0.254966	0.780829	0.791541	0.95196	1	2125	tags=31%, list=27%, signal=42%
GOMF_ATPASE_BINDING	GOMF_ATPASE_BINDING		55	0.229441	0.777695	0.844703	0.952861	1	958	tags=13%, list=12%, signal=14%
GOMF_RECEPTOR_REGULATOR_ACTIVITY	GOMF_RECEPTOR_REGULATOR_ACTIVITY		60	0.225041	0.771457	0.858369	0.958333	1	2329	tags=38%, list=29%, signal=54%
GOMF_NUCLEOSOMAL_DNA_BINDING	GOMF_NUCLEOSOMAL_DNA_BINDING		30	0.260188	0.76461	0.816074	0.964109	1	365	tags=10%, list=5%, signal=10%
GOMF_POLY_A_BINDING	GOMF_POLY_A_BINDING		15	0.293591	0.762661	0.790186	0.963025	1	1712	tags=20%, list=21%, signal=25%
GOMF_CADHERIN_BINDING	GOMF_CADHERIN_BINDING		275	0.183624	0.762346	0.971363	0.959523	1	1962	tags=23%, list=25%, signal=29%
GOMF_CALCIUM_DEPENDENT_PROTEIN_KINASE_ACTIVITY	GOMF_CALCIUM_DEPENDENT_PROTEIN_KINASE_ACTIVITY		15	0.299178	0.759421	0.770134	0.959372	1	1934	tags=33%, list=24%, signal=44%
GOMF_PHOSPHATASE_BINDING	GOMF_PHOSPHATASE_BINDING		126	0.198381	0.756692	0.934124	0.959269	1	1724	tags=21%, list=22%, signal=26%
GOMF_POLYUBIQUITIN_MODIFICATION_DEPENDENT_PROTEIN_BINDING	GOMF_POLYUBIQUITIN_MODIFICATION_DEPENDENT_PROTEIN_BINDING		38	0.236492	0.755073	0.825373	0.957657	1	308	tags=8%, list=4%, signal=8%
GOMF_BETA_CATENIN_BINDING	GOMF_BETA_CATENIN_BINDING		47	0.228037	0.751538	0.856105	0.958545	1	856	tags=15%, list=11%, signal=17%
GOMF_CHROMATIN_DNA_BINDING	GOMF_CHROMATIN_DNA_BINDING		64	0.214968	0.747061	0.879552	0.960178	1	1520	tags=20%, list=19%, signal=25%
GOMF_REGULATORY_RNA_BINDING	GOMF_REGULATORY_RNA_BINDING		29	0.247463	0.740869	0.84953	0.963793	1	1259	tags=14%, list=16%, signal=16%
GOMF_PHOSPHORIC_DIESTER_HYDROLASE_ACTIVITY	GOMF_PHOSPHORIC_DIESTER_HYDROLASE_ACTIVITY		33	0.244334	0.740739	0.855828	0.960147	1	2424	tags=45%, list=30%, signal=65%
GOMF_PHOSPHATIDYLINOSITOL_BISPHOSPHATE_PHOSPHATASE_ACTIVITY	GOMF_PHOSPHATIDYLINOSITOL_BISPHOSPHATE_PHOSPHATASE_ACTIVITY		19	0.27699	0.740083	0.823899	0.957231	1	2988	tags=58%, list=38%, signal=92%
GOMF_ACYL_COA_BINDING	GOMF_ACYL_COA_BINDING		15	0.289469	0.729058	0.797407	0.966264	1	2592	tags=53%, list=33%, signal=79%
GOMF_K63_LINKED_POLYUBIQUITIN_MODIFICATION_DEPENDENT_PROTEIN_BINDING	GOMF_K63_LINKED_POLYUBIQUITIN_MODIFICATION_DEPENDENT_PROTEIN_BINDING		15	0.28888	0.725065	0.828439	0.966767	1	813	tags=13%, list=10%, signal=15%
GOMF_GROWTH_FACTOR_ACTIVITY	GOMF_GROWTH_FACTOR_ACTIVITY		25	0.25193	0.723179	0.858521	0.965107	1	912	tags=20%, list=11%, signal=23%
GOMF_PROTEIN_PHOSPHATASE_BINDING	GOMF_PROTEIN_PHOSPHATASE_BINDING		97	0.195168	0.721353	0.958869	0.96335	1	1205	tags=15%, list=15%, signal=18%
GOMF_ISOMERASE_ACTIVITY	GOMF_ISOMERASE_ACTIVITY		112	0.189187	0.711231	0.956464	0.969716	1	2111	tags=25%, list=26%, signal=34%
GOMF_HYDROLASE_ACTIVITY_ACTING_ON_CARBON_NITROGEN_BUT_NOT_PEPTIDE_BONDS_IN_LINEAR_AMIDES	GOMF_HYDROLASE_ACTIVITY_ACTING_ON_CARBON_NITROGEN_BUT_NOT_PEPTIDE_BONDS_IN_LINEAR_AMIDES		33	0.231317	0.699284	0.904545	0.976966	1	1337	tags=18%, list=17%, signal=22%
GOMF_PROTEIN_TYROSINE_SERINE_THREONINE_PHOSPHATASE_ACTIVITY	GOMF_PROTEIN_TYROSINE_SERINE_THREONINE_PHOSPHATASE_ACTIVITY		19	0.259437	0.698572	0.878247	0.973801	1	1295	tags=21%, list=16%, signal=25%
GOMF_PROTEIN_SERINE_THREONINE_KINASE_ACTIVITY	GOMF_PROTEIN_SERINE_THREONINE_KINASE_ACTIVITY		253	0.163595	0.678484	0.996355	0.986564	1	2266	tags=24%, list=28%, signal=33%
GOMF_NF_KAPPAB_BINDING	GOMF_NF_KAPPAB_BINDING		23	0.230383	0.65307	0.91879	1	1	1685	tags=17%, list=21%, signal=22%
GOMF_SH2_DOMAIN_BINDING	GOMF_SH2_DOMAIN_BINDING		22	0.235402	0.650771	0.934747	0.998098	1	53	tags=5%, list=1%, signal=5%
GOMF_ENDODEOXYRIBONUCLEASE_ACTIVITY	GOMF_ENDODEOXYRIBONUCLEASE_ACTIVITY		28	0.218568	0.643327	0.944109	0.998563	1	968	tags=11%, list=12%, signal=12%
GOMF_DOUBLE_STRANDED_RNA_BINDING	GOMF_DOUBLE_STRANDED_RNA_BINDING		61	0.182561	0.623341	0.976519	1	1	615	tags=8%, list=8%, signal=9%
GOMF_PROTEIN_SERINE_THREONINE_KINASE_ACTIVATOR_ACTIVITY	GOMF_PROTEIN_SERINE_THREONINE_KINASE_ACTIVATOR_ACTIVITY		24	0.218262	0.617144	0.948032	1	1	2399	tags=33%, list=30%, signal=48%
GOMF_P53_BINDING	GOMF_P53_BINDING		46	0.183937	0.601477	0.984397	1	1	1059	tags=9%, list=13%, signal=10%
GOMF_PROTEIN_SERINE_KINASE_ACTIVITY	GOMF_PROTEIN_SERINE_KINASE_ACTIVITY		150	0.151297	0.593445	0.9975	1	1	2299	tags=24%, list=29%, signal=33%
GOMF_SIGNALING_ADAPTOR_ACTIVITY	GOMF_SIGNALING_ADAPTOR_ACTIVITY		41	0.185395	0.588765	0.985163	1	1	1766	tags=20%, list=22%, signal=25%
GOMF_PHOSPHATIDYLINOSITOL_MONOPHOSPHATE_PHOSPHATASE_ACTIVITY	GOMF_PHOSPHATIDYLINOSITOL_MONOPHOSPHATE_PHOSPHATASE_ACTIVITY		15	0.228737	0.575713	0.962723	1	1	2103	tags=40%, list=26%, signal=54%
GOMF_MICROTUBULE_BINDING	GOMF_MICROTUBULE_BINDING		162	0.144638	0.574384	1	1	1	2658	tags=31%, list=33%, signal=46%
GOMF_DEACETYLASE_ACTIVITY	GOMF_DEACETYLASE_ACTIVITY		23	0.199239	0.56892	0.976994	0.997942	1	83	tags=4%, list=1%, signal=4%
GOMF_KINESIN_BINDING	GOMF_KINESIN_BINDING		24	0.194679	0.55536	0.983793	0.997484	1	2197	tags=21%, list=28%, signal=29%
GOMF_CALMODULIN_DEPENDENT_PROTEIN_KINASE_ACTIVITY	GOMF_CALMODULIN_DEPENDENT_PROTEIN_KINASE_ACTIVITY		15	0.218757	0.552666	0.972131	0.994426	1	724	tags=13%, list=9%, signal=15%
GOMF_TRANSCRIPTION_COREPRESSOR_BINDING	GOMF_TRANSCRIPTION_COREPRESSOR_BINDING		22	0.148899	0.416382	0.998415	1	1	6783	tags=100%, list=85%, signal=671%
GOMF_MIRNA_BINDING	GOMF_MIRNA_BINDING		24	0.127124	0.361868	1	0.999867	1	2461	tags=21%, list=31%, signal=30%

## Sheet: GOMF_up_in_sgControl
NAME	GS<br> follow link to MSigDB	GS DETAILS	SIZE	ES	NES	NOM p-val	FDR q-val	FWER p-val	RANK AT MAX	LEADING EDGE
GOMF_METAL_CLUSTER_BINDING	GOMF_METAL_CLUSTER_BINDING	Details ...	54	-0.69634	-2.68679	0	0	0	437	tags=39%, list=5%, signal=41%
GOMF_PROTEIN_FOLDING_CHAPERONE	GOMF_PROTEIN_FOLDING_CHAPERONE	Details ...	27	-0.756448	-2.47064	0	0	0	1117	tags=74%, list=14%, signal=86%
GOMF_4_IRON_4_SULFUR_CLUSTER_BINDING	GOMF_4_IRON_4_SULFUR_CLUSTER_BINDING	Details ...	35	-0.696095	-2.34813	0	0	0	215	tags=37%, list=3%, signal=38%
GOMF_2_IRON_2_SULFUR_CLUSTER_BINDING	GOMF_2_IRON_2_SULFUR_CLUSTER_BINDING	Details ...	17	-0.836316	-2.33772	0	0	0	364	tags=47%, list=5%, signal=49%
GOMF_UNFOLDED_PROTEIN_BINDING	GOMF_UNFOLDED_PROTEIN_BINDING	Details ...	89	-0.555875	-2.32471	0	0	0	1111	tags=45%, list=14%, signal=52%
GOMF_DNA_POLYMERASE_ACTIVITY	GOMF_DNA_POLYMERASE_ACTIVITY	Details ...	23	-0.719366	-2.25402	0	0	0	745	tags=43%, list=9%, signal=48%
GOMF_DNA_DIRECTED_DNA_POLYMERASE_ACTIVITY	GOMF_DNA_DIRECTED_DNA_POLYMERASE_ACTIVITY	Details ...	18	-0.757623	-2.20511	0	0.000188679	0.001	745	tags=50%, list=9%, signal=55%
GOMF_RNA_POLYMERASE_ACTIVITY	GOMF_RNA_POLYMERASE_ACTIVITY	Details ...	30	-0.664069	-2.16142	0	0.000839562	0.005	1906	tags=57%, list=24%, signal=74%
GOMF_NUCLEOTIDYLTRANSFERASE_ACTIVITY	GOMF_NUCLEOTIDYLTRANSFERASE_ACTIVITY	Details ...	92	-0.500883	-2.08799	0	0.00253877	0.017	1362	tags=35%, list=17%, signal=41%
GOMF_CHAPERONE_BINDING	GOMF_CHAPERONE_BINDING	Details ...	69	-0.498141	-1.96283	0	0.0162663	0.113	1618	tags=49%, list=20%, signal=61%
GOMF_CATALYTIC_ACTIVITY_ACTING_ON_DNA	GOMF_CATALYTIC_ACTIVITY_ACTING_ON_DNA	Details ...	144	-0.437455	-1.93536	0	0.0192215	0.145	1816	tags=33%, list=23%, signal=42%
GOMF_TRNA_BINDING	GOMF_TRNA_BINDING	Details ...	55	-0.506985	-1.90953	0	0.0223597	0.178	813	tags=27%, list=10%, signal=30%
GOMF_PROTEASOME_BINDING	GOMF_PROTEASOME_BINDING	Details ...	15	-0.653783	-1.84946	0.00522193	0.0369004	0.299	1574	tags=60%, list=20%, signal=75%
GOMF_GENERAL_TRANSCRIPTION_INITIATION_FACTOR_ACTIVITY	GOMF_GENERAL_TRANSCRIPTION_INITIATION_FACTOR_ACTIVITY	Details ...	29	-0.552865	-1.79869	0	0.0556828	0.439	2436	tags=72%, list=31%, signal=104%
GOMF_DNA_REPLICATION_ORIGIN_BINDING	GOMF_DNA_REPLICATION_ORIGIN_BINDING	Details ...	17	-0.621788	-1.79759	0.00802139	0.0524951	0.445	2772	tags=88%, list=35%, signal=135%
GOMF_PHOSPHATASE_INHIBITOR_ACTIVITY	GOMF_PHOSPHATASE_INHIBITOR_ACTIVITY	Details ...	22	-0.577018	-1.79088	0.00263158	0.0524044	0.467	2006	tags=55%, list=25%, signal=73%
GOMF_DNA_HELICASE_ACTIVITY	GOMF_DNA_HELICASE_ACTIVITY	Details ...	62	-0.458084	-1.78165	0.00326797	0.0531441	0.491	2665	tags=56%, list=33%, signal=84%
GOMF_NUCLEAR_LOCALIZATION_SEQUENCE_BINDING	GOMF_NUCLEAR_LOCALIZATION_SEQUENCE_BINDING	Details ...	19	-0.589315	-1.78113	0.00808625	0.050491	0.493	2285	tags=58%, list=29%, signal=81%
GOMF_ATPASE_REGULATOR_ACTIVITY	GOMF_ATPASE_REGULATOR_ACTIVITY	Details ...	33	-0.525791	-1.76835	0.00597015	0.0531432	0.529	1618	tags=52%, list=20%, signal=64%
GOMF_OXIDOREDUCTASE_ACTIVITY_ACTING_ON_NAD_P_H_QUINONE_OR_SIMILAR_COMPOUND_AS_ACCEPTOR	GOMF_OXIDOREDUCTASE_ACTIVITY_ACTING_ON_NAD_P_H_QUINONE_OR_SIMILAR_COMPOUND_AS_ACCEPTOR	Details ...	49	-0.468115	-1.76366	0	0.0525905	0.54	1709	tags=41%, list=21%, signal=52%
GOMF_TRANSLATION_INITIATION_FACTOR_ACTIVITY	GOMF_TRANSLATION_INITIATION_FACTOR_ACTIVITY		46	-0.477005	-1.73246	0	0.0658387	0.635	1983	tags=50%, list=25%, signal=66%
GOMF_3_5_EXONUCLEASE_ACTIVITY	GOMF_3_5_EXONUCLEASE_ACTIVITY		44	-0.466019	-1.69898	0.00955414	0.0821086	0.716	2145	tags=52%, list=27%, signal=71%
GOMF_REPRESSING_TRANSCRIPTION_FACTOR_BINDING	GOMF_REPRESSING_TRANSCRIPTION_FACTOR_BINDING		45	-0.451329	-1.69201	0.00606061	0.0830137	0.737	1378	tags=40%, list=17%, signal=48%
GOMF_RNA_POLYMERASE_II_GENERAL_TRANSCRIPTION_INITIATION_FACTOR_ACTIVITY	GOMF_RNA_POLYMERASE_II_GENERAL_TRANSCRIPTION_INITIATION_FACTOR_ACTIVITY		24	-0.538761	-1.6904	0.0165746	0.0805257	0.746	2436	tags=71%, list=31%, signal=102%
GOMF_MRNA_5_UTR_BINDING	GOMF_MRNA_5_UTR_BINDING		23	-0.548363	-1.66401	0.0160428	0.0950505	0.823	1311	tags=35%, list=16%, signal=42%
GOMF_ACTIVATING_TRANSCRIPTION_FACTOR_BINDING	GOMF_ACTIVATING_TRANSCRIPTION_FACTOR_BINDING		41	-0.477623	-1.64867	0.0147929	0.102527	0.856	1595	tags=44%, list=20%, signal=55%
GOMF_HEAT_SHOCK_PROTEIN_BINDING	GOMF_HEAT_SHOCK_PROTEIN_BINDING		80	-0.401465	-1.6389	0.0037037	0.107049	0.879	1111	tags=33%, list=14%, signal=37%
GOMF_NUCLEOCYTOPLASMIC_CARRIER_ACTIVITY	GOMF_NUCLEOCYTOPLASMIC_CARRIER_ACTIVITY		27	-0.499376	-1.62342	0.0348837	0.115958	0.907	2285	tags=56%, list=29%, signal=78%
GOMF_UBIQUITIN_LIKE_PROTEIN_BINDING	GOMF_UBIQUITIN_LIKE_PROTEIN_BINDING		81	-0.384867	-1.62318	0.00332226	0.112098	0.907	1972	tags=37%, list=25%, signal=49%
GOMF_NAD_P_H_DEHYDROGENASE_QUINONE_ACTIVITY	GOMF_NAD_P_H_DEHYDROGENASE_QUINONE_ACTIVITY		39	-0.45612	-1.61302	0.0191693	0.11722	0.922	2350	tags=54%, list=29%, signal=76%
GOMF_CATALYTIC_ACTIVITY_ACTING_ON_RNA	GOMF_CATALYTIC_ACTIVITY_ACTING_ON_RNA		305	-0.326258	-1.60963	0	0.11634	0.928	2145	tags=37%, list=27%, signal=49%
GOMF_HELICASE_ACTIVITY	GOMF_HELICASE_ACTIVITY		136	-0.360626	-1.60687	0	0.114511	0.931	2716	tags=51%, list=34%, signal=76%
GOMF_DNA_BINDING_TRANSCRIPTION_FACTOR_BINDING	GOMF_DNA_BINDING_TRANSCRIPTION_FACTOR_BINDING		231	-0.328985	-1.59126	0	0.123709	0.949	1810	tags=33%, list=23%, signal=42%
GOMF_NUCLEAR_IMPORT_SIGNAL_RECEPTOR_ACTIVITY	GOMF_NUCLEAR_IMPORT_SIGNAL_RECEPTOR_ACTIVITY		17	-0.558705	-1.57353	0.0343008	0.135706	0.968	1407	tags=47%, list=18%, signal=57%
GOMF_TRANSLATION_INITIATION_FACTOR_BINDING	GOMF_TRANSLATION_INITIATION_FACTOR_BINDING		22	-0.512298	-1.57046	0.016129	0.134599	0.971	739	tags=23%, list=9%, signal=25%
GOMF_N_ACETYLTRANSFERASE_ACTIVITY	GOMF_N_ACETYLTRANSFERASE_ACTIVITY		45	-0.421807	-1.5637	0.0122324	0.137695	0.976	2578	tags=51%, list=32%, signal=75%
GOMF_RNA_POLYMERASE_II_GENERAL_TRANSCRIPTION_INITIATION_FACTOR_BINDING	GOMF_RNA_POLYMERASE_II_GENERAL_TRANSCRIPTION_INITIATION_FACTOR_BINDING		15	-0.565033	-1.55857	0.039267	0.138707	0.979	466	tags=20%, list=6%, signal=21%
GOMF_TRNA_METHYLTRANSFERASE_ACTIVITY	GOMF_TRNA_METHYLTRANSFERASE_ACTIVITY		25	-0.485724	-1.55083	0.0317919	0.1427	0.981	2432	tags=52%, list=31%, signal=75%
GOMF_HISTONE_DEACETYLASE_BINDING	GOMF_HISTONE_DEACETYLASE_BINDING		73	-0.38587	-1.54242	0.00701754	0.147152	0.985	2126	tags=49%, list=27%, signal=67%
GOMF_LIPOPROTEIN_PARTICLE_RECEPTOR_BINDING	GOMF_LIPOPROTEIN_PARTICLE_RECEPTOR_BINDING		16	-0.542578	-1.5181	0.0484694	0.168506	0.99	850	tags=31%, list=11%, signal=35%
GOMF_THYROID_HORMONE_RECEPTOR_BINDING	GOMF_THYROID_HORMONE_RECEPTOR_BINDING		25	-0.470471	-1.51403	0.0289474	0.168225	0.99	2231	tags=56%, list=28%, signal=78%
GOMF_UBIQUITIN_BINDING	GOMF_UBIQUITIN_BINDING		65	-0.386494	-1.5111	0.0182482	0.168078	0.992	1972	tags=38%, list=25%, signal=51%
GOMF_GENERAL_TRANSCRIPTION_INITIATION_FACTOR_BINDING	GOMF_GENERAL_TRANSCRIPTION_INITIATION_FACTOR_BINDING		31	-0.451913	-1.50899	0.0238806	0.166758	0.993	889	tags=19%, list=11%, signal=22%
GOMF_PEPTIDE_LYSINE_N_ACETYLTRANSFERASE_ACTIVITY	GOMF_PEPTIDE_LYSINE_N_ACETYLTRANSFERASE_ACTIVITY		33	-0.439154	-1.50735	0.0175439	0.164516	0.993	2185	tags=45%, list=27%, signal=62%
GOMF_MICROTUBULE_MOTOR_ACTIVITY	GOMF_MICROTUBULE_MOTOR_ACTIVITY		36	-0.438387	-1.50184	0.0213415	0.166327	0.994	2453	tags=64%, list=31%, signal=92%
GOMF_ELECTRON_TRANSFER_ACTIVITY	GOMF_ELECTRON_TRANSFER_ACTIVITY		92	-0.357572	-1.49855	0.00763359	0.165856	0.995	1148	tags=27%, list=14%, signal=31%
GOMF_PEPTIDE_N_ACETYLTRANSFERASE_ACTIVITY	GOMF_PEPTIDE_N_ACETYLTRANSFERASE_ACTIVITY		39	-0.429075	-1.49143	0.0280374	0.169612	0.999	2486	tags=49%, list=31%, signal=70%
GOMF_TRANSLATION_FACTOR_ACTIVITY_RNA_BINDING	GOMF_TRANSLATION_FACTOR_ACTIVITY_RNA_BINDING		73	-0.379136	-1.48809	0.0239726	0.169449	0.999	2048	tags=45%, list=26%, signal=60%
GOMF_ADP_BINDING	GOMF_ADP_BINDING		33	-0.440424	-1.48503	0.0489297	0.168829	0.999	782	tags=24%, list=10%, signal=27%
GOMF_N_ACYLTRANSFERASE_ACTIVITY	GOMF_N_ACYLTRANSFERASE_ACTIVITY		52	-0.397539	-1.47879	0.0186335	0.171778	0.999	1771	tags=31%, list=22%, signal=39%
GOMF_OXIDOREDUCTASE_ACTIVITY_ACTING_ON_THE_CH_CH_GROUP_OF_DONORS_NAD_OR_NADP_AS_ACCEPTOR	GOMF_OXIDOREDUCTASE_ACTIVITY_ACTING_ON_THE_CH_CH_GROUP_OF_DONORS_NAD_OR_NADP_AS_ACCEPTOR		20	-0.489962	-1.46634	0.0517711	0.181287	1	86	tags=15%, list=1%, signal=15%
GOMF_DISORDERED_DOMAIN_SPECIFIC_BINDING	GOMF_DISORDERED_DOMAIN_SPECIFIC_BINDING		21	-0.464658	-1.46039	0.0595855	0.184985	1	1924	tags=48%, list=24%, signal=63%
GOMF_RNA_POLYMERASE_II_ACTIVATING_TRANSCRIPTION_FACTOR_BINDING	GOMF_RNA_POLYMERASE_II_ACTIVATING_TRANSCRIPTION_FACTOR_BINDING		21	-0.485817	-1.45902	0.0868347	0.183054	1	1595	tags=48%, list=20%, signal=59%
GOMF_TRANSLATION_REGULATOR_ACTIVITY_NUCLEIC_ACID_BINDING	GOMF_TRANSLATION_REGULATOR_ACTIVITY_NUCLEIC_ACID_BINDING		86	-0.3562	-1.45836	0.00754717	0.180247	1	2073	tags=43%, list=26%, signal=58%
GOMF_RNA_POLYMERASE_II_SPECIFIC_DNA_BINDING_TRANSCRIPTION_FACTOR_BINDING	GOMF_RNA_POLYMERASE_II_SPECIFIC_DNA_BINDING_TRANSCRIPTION_FACTOR_BINDING		176	-0.310979	-1.4459	0.0104712	0.191587	1	1810	tags=32%, list=23%, signal=40%
GOMF_STEROID_HORMONE_RECEPTOR_BINDING	GOMF_STEROID_HORMONE_RECEPTOR_BINDING		51	-0.38607	-1.42246	0.0579268	0.215869	1	1731	tags=33%, list=22%, signal=42%
GOMF_DNA_POLYMERASE_BINDING	GOMF_DNA_POLYMERASE_BINDING		16	-0.506301	-1.41595	0.0789474	0.219851	1	1383	tags=44%, list=17%, signal=53%
GOMF_ALCOHOL_DEHYDROGENASE_NADPPLUS_ACTIVITY	GOMF_ALCOHOL_DEHYDROGENASE_NADPPLUS_ACTIVITY		17	-0.495591	-1.41504	0.0825	0.217363	1	409	tags=35%, list=5%, signal=37%
GOMF_PROTEIN_PHOSPHATASE_2A_BINDING	GOMF_PROTEIN_PHOSPHATASE_2A_BINDING		22	-0.463711	-1.40322	0.074813	0.229626	1	475	tags=14%, list=6%, signal=14%
GOMF_PEPTIDE_BINDING	GOMF_PEPTIDE_BINDING		129	-0.312706	-1.39114	0.0132743	0.241975	1	1262	tags=29%, list=16%, signal=34%
GOMF_EXONUCLEASE_ACTIVITY_ACTIVE_WITH_EITHER_RIBO_OR_DEOXYRIBONUCLEIC_ACIDS_AND_PRODUCING_5_PHOSPHOMONOESTERS	GOMF_EXONUCLEASE_ACTIVITY_ACTIVE_WITH_EITHER_RIBO_OR_DEOXYRIBONUCLEIC_ACIDS_AND_PRODUCING_5_PHOSPHOMONOESTERS		46	-0.381072	-1.38203	0.0593472	0.24982	1	2145	tags=43%, list=27%, signal=59%
GOMF_EXONUCLEASE_ACTIVITY	GOMF_EXONUCLEASE_ACTIVITY		60	-0.362456	-1.38151	0.0535714	0.246429	1	2218	tags=42%, list=28%, signal=57%
GOMF_DAMAGED_DNA_BINDING	GOMF_DAMAGED_DNA_BINDING		52	-0.36801	-1.37395	0.0823529	0.253462	1	1726	tags=31%, list=22%, signal=39%
GOMF_SINGLE_STRANDED_DNA_BINDING	GOMF_SINGLE_STRANDED_DNA_BINDING		84	-0.331816	-1.36322	0.0406504	0.26458	1	2047	tags=39%, list=26%, signal=52%
GOMF_TRANSCRIPTION_COREPRESSOR_ACTIVITY	GOMF_TRANSCRIPTION_COREPRESSOR_ACTIVITY		128	-0.307865	-1.36269	0.0151515	0.261135	1	2465	tags=47%, list=31%, signal=67%
GOMF_ESTROGEN_RECEPTOR_BINDING	GOMF_ESTROGEN_RECEPTOR_BINDING		27	-0.425709	-1.36107	0.106017	0.259837	1	2340	tags=52%, list=29%, signal=73%
GOMF_UBIQUITIN_LIKE_PROTEIN_TRANSFERASE_ACTIVITY	GOMF_UBIQUITIN_LIKE_PROTEIN_TRANSFERASE_ACTIVITY		246	-0.283074	-1.35977	0	0.257835	1	1258	tags=26%, list=16%, signal=30%
GOMF_CHROMATIN_BINDING	GOMF_CHROMATIN_BINDING		345	-0.278049	-1.35696	0.00925926	0.258183	1	1885	tags=30%, list=24%, signal=37%
GOMF_NUCLEASE_ACTIVITY	GOMF_NUCLEASE_ACTIVITY		130	-0.304369	-1.35637	0.0233645	0.255223	1	2273	tags=38%, list=29%, signal=52%
GOMF_ALDO_KETO_REDUCTASE_NADP_ACTIVITY	GOMF_ALDO_KETO_REDUCTASE_NADP_ACTIVITY		20	-0.448671	-1.35538	0.126615	0.252802	1	409	tags=30%, list=5%, signal=32%
GOMF_OXIDOREDUCTASE_ACTIVITY_ACTING_ON_NAD_P_H	GOMF_OXIDOREDUCTASE_ACTIVITY_ACTING_ON_NAD_P_H		74	-0.334674	-1.35475	0.0472973	0.250116	1	1549	tags=32%, list=19%, signal=40%
GOMF_HSP70_PROTEIN_BINDING	GOMF_HSP70_PROTEIN_BINDING		22	-0.442874	-1.34542	0.126722	0.259353	1	1693	tags=45%, list=21%, signal=58%
GOMF_PEPTIDE_ANTIGEN_BINDING	GOMF_PEPTIDE_ANTIGEN_BINDING		17	-0.47776	-1.34243	0.107438	0.259483	1	161	tags=29%, list=2%, signal=30%
GOMF_TRANSCRIPTION_FACTOR_BINDING	GOMF_TRANSCRIPTION_FACTOR_BINDING		379	-0.26921	-1.34149	0	0.25703	1	1810	tags=30%, list=23%, signal=37%
GOMF_LIGASE_ACTIVITY_FORMING_CARBON_NITROGEN_BONDS	GOMF_LIGASE_ACTIVITY_FORMING_CARBON_NITROGEN_BONDS		33	-0.390569	-1.33882	0.0869565	0.257464	1	195	tags=18%, list=2%, signal=19%
GOMF_MISFOLDED_PROTEIN_BINDING	GOMF_MISFOLDED_PROTEIN_BINDING		21	-0.45167	-1.33483	0.126761	0.259491	1	1227	tags=38%, list=15%, signal=45%
GOMF_TRANSLATION_REGULATOR_ACTIVITY	GOMF_TRANSLATION_REGULATOR_ACTIVITY		107	-0.304802	-1.31896	0.0458015	0.278852	1	2073	tags=41%, list=26%, signal=55%
GOMF_SIGNAL_SEQUENCE_BINDING	GOMF_SIGNAL_SEQUENCE_BINDING		32	-0.39847	-1.31559	0.101124	0.279487	1	1579	tags=34%, list=20%, signal=43%
GOMF_TRANSCRIPTION_COREGULATOR_ACTIVITY	GOMF_TRANSCRIPTION_COREGULATOR_ACTIVITY		339	-0.263839	-1.30548	0	0.290845	1	1718	tags=26%, list=22%, signal=32%
GOMF_SNORNA_BINDING	GOMF_SNORNA_BINDING		30	-0.394141	-1.29789	0.129338	0.299172	1	2165	tags=40%, list=27%, signal=55%
GOMF_OXIDOREDUCTASE_ACTIVITY_ACTING_ON_THE_CH_CH_GROUP_OF_DONORS	GOMF_OXIDOREDUCTASE_ACTIVITY_ACTING_ON_THE_CH_CH_GROUP_OF_DONORS		47	-0.347416	-1.29734	0.115987	0.296401	1	249	tags=13%, list=3%, signal=13%
GOMF_NADP_BINDING	GOMF_NADP_BINDING		35	-0.379584	-1.28422	0.15015	0.313311	1	133	tags=11%, list=2%, signal=12%
GOMF_PROTEIN_METHYLTRANSFERASE_ACTIVITY	GOMF_PROTEIN_METHYLTRANSFERASE_ACTIVITY		61	-0.328299	-1.28342	0.0841424	0.310618	1	2379	tags=43%, list=30%, signal=60%
GOMF_CATALYTIC_ACTIVITY_ACTING_ON_A_TRNA	GOMF_CATALYTIC_ACTIVITY_ACTING_ON_A_TRNA		104	-0.304993	-1.28337	0.0600858	0.307003	1	1459	tags=25%, list=18%, signal=30%
GOMF_ATPASE_ACTIVATOR_ACTIVITY	GOMF_ATPASE_ACTIVATOR_ACTIVITY		19	-0.438085	-1.28248	0.15508	0.304604	1	850	tags=32%, list=11%, signal=35%
GOMF_UBIQUITIN_LIKE_PROTEIN_CONJUGATING_ENZYME_BINDING	GOMF_UBIQUITIN_LIKE_PROTEIN_CONJUGATING_ENZYME_BINDING		25	-0.402491	-1.28117	0.148045	0.303375	1	1625	tags=40%, list=20%, signal=50%
GOMF_EXODEOXYRIBONUCLEASE_ACTIVITY	GOMF_EXODEOXYRIBONUCLEASE_ACTIVITY		15	-0.454562	-1.2723	0.171429	0.31384	1	641	tags=20%, list=8%, signal=22%
GOMF_MOLECULAR_CARRIER_ACTIVITY	GOMF_MOLECULAR_CARRIER_ACTIVITY		46	-0.355361	-1.27045	0.133929	0.31309	1	1407	tags=33%, list=18%, signal=39%
GOMF_UBIQUITIN_LIKE_PROTEIN_LIGASE_ACTIVITY	GOMF_UBIQUITIN_LIKE_PROTEIN_LIGASE_ACTIVITY		152	-0.279077	-1.26254	0.0422535	0.321717	1	1501	tags=30%, list=19%, signal=36%
GOMF_MRNA_3_UTR_BINDING	GOMF_MRNA_3_UTR_BINDING		59	-0.325514	-1.26159	0.106667	0.319714	1	2752	tags=47%, list=35%, signal=72%
GOMF_RNA_POLYMERASE_II_REPRESSING_TRANSCRIPTION_FACTOR_BINDING	GOMF_RNA_POLYMERASE_II_REPRESSING_TRANSCRIPTION_FACTOR_BINDING		23	-0.404973	-1.25526	0.15493	0.32632	1	1644	tags=43%, list=21%, signal=55%
GOMF_BASAL_TRANSCRIPTION_MACHINERY_BINDING	GOMF_BASAL_TRANSCRIPTION_MACHINERY_BINDING		48	-0.344138	-1.25259	0.123377	0.326814	1	2428	tags=44%, list=30%, signal=63%
GOMF_TRANSCRIPTION_COACTIVATOR_ACTIVITY	GOMF_TRANSCRIPTION_COACTIVATOR_ACTIVITY		189	-0.268713	-1.24879	0.0384615	0.329635	1	1768	tags=27%, list=22%, signal=34%
GOMF_CIS_TRANS_ISOMERASE_ACTIVITY	GOMF_CIS_TRANS_ISOMERASE_ACTIVITY		31	-0.377192	-1.24203	0.139053	0.337336	1	560	tags=16%, list=7%, signal=17%
GOMF_NUCLEAR_RECEPTOR_BINDING	GOMF_NUCLEAR_RECEPTOR_BINDING		65	-0.324434	-1.23837	0.150685	0.339267	1	1808	tags=29%, list=23%, signal=38%
GOMF_RNA_HELICASE_ACTIVITY	GOMF_RNA_HELICASE_ACTIVITY		68	-0.315558	-1.23833	0.117647	0.335777	1	2529	tags=47%, list=32%, signal=68%
GOMF_TBP_CLASS_PROTEIN_BINDING	GOMF_TBP_CLASS_PROTEIN_BINDING		16	-0.438784	-1.23628	0.234043	0.335667	1	2168	tags=50%, list=27%, signal=69%
GOMF_MRNA_BINDING	GOMF_MRNA_BINDING		216	-0.25867	-1.22854	0.0324324	0.345422	1	2370	tags=40%, list=30%, signal=55%
GOMF_RNA_METHYLTRANSFERASE_ACTIVITY	GOMF_RNA_METHYLTRANSFERASE_ACTIVITY		52	-0.329861	-1.22195	0.137072	0.352712	1	2435	tags=44%, list=31%, signal=63%
GOMF_WW_DOMAIN_BINDING	GOMF_WW_DOMAIN_BINDING		15	-0.441274	-1.22092	0.22439	0.351146	1	1838	tags=47%, list=23%, signal=61%
GOMF_NUCLEAR_HORMONE_RECEPTOR_BINDING	GOMF_NUCLEAR_HORMONE_RECEPTOR_BINDING		101	-0.287621	-1.21915	0.124	0.350463	1	1810	tags=31%, list=23%, signal=39%
GOMF_AMIDE_BINDING	GOMF_AMIDE_BINDING		177	-0.258791	-1.21902	0.0558659	0.347276	1	1359	tags=27%, list=17%, signal=31%
GOMF_PROTEIN_DEACETYLASE_ACTIVITY	GOMF_PROTEIN_DEACETYLASE_ACTIVITY		17	-0.419542	-1.2187	0.212821	0.344399	1	1378	tags=29%, list=17%, signal=35%
GOMF_ANTIGEN_BINDING	GOMF_ANTIGEN_BINDING		23	-0.383879	-1.21282	0.18956	0.350871	1	161	tags=22%, list=2%, signal=22%
GOMF_EXORIBONUCLEASE_ACTIVITY	GOMF_EXORIBONUCLEASE_ACTIVITY		35	-0.354363	-1.20866	0.205634	0.3547	1	2145	tags=46%, list=27%, signal=62%
GOMF_MONOCARBOXYLIC_ACID_BINDING	GOMF_MONOCARBOXYLIC_ACID_BINDING		29	-0.361222	-1.19695	0.201754	0.371437	1	1331	tags=38%, list=17%, signal=45%
GOMF_DNA_DEPENDENT_ATPASE_ACTIVITY	GOMF_DNA_DEPENDENT_ATPASE_ACTIVITY		44	-0.331737	-1.19411	0.171053	0.373213	1	2581	tags=50%, list=32%, signal=74%
GOMF_RETINOIC_ACID_RECEPTOR_BINDING	GOMF_RETINOIC_ACID_RECEPTOR_BINDING		18	-0.410304	-1.19334	0.218579	0.371071	1	1808	tags=39%, list=23%, signal=50%
GOMF_SEQUENCE_SPECIFIC_DNA_BINDING	GOMF_SEQUENCE_SPECIFIC_DNA_BINDING		497	-0.230754	-1.18933	0	0.375222	1	1564	tags=25%, list=20%, signal=29%
GOMF_ENDONUCLEASE_ACTIVITY	GOMF_ENDONUCLEASE_ACTIVITY		76	-0.293785	-1.18012	0.167273	0.388645	1	1619	tags=24%, list=20%, signal=29%
GOMF_RNA_POLYMERASE_BINDING	GOMF_RNA_POLYMERASE_BINDING		52	-0.314717	-1.17654	0.184127	0.391819	1	2428	tags=48%, list=30%, signal=69%
GOMF_CIS_REGULATORY_REGION_SEQUENCE_SPECIFIC_DNA_BINDING	GOMF_CIS_REGULATORY_REGION_SEQUENCE_SPECIFIC_DNA_BINDING		303	-0.24211	-1.16114	0.0909091	0.417917	1	1320	tags=22%, list=17%, signal=26%
GOMF_POLY_PYRIMIDINE_TRACT_BINDING	GOMF_POLY_PYRIMIDINE_TRACT_BINDING		20	-0.385106	-1.15967	0.265092	0.416831	1	2335	tags=45%, list=29%, signal=63%
GOMF_RIBONUCLEOPROTEIN_COMPLEX_BINDING	GOMF_RIBONUCLEOPROTEIN_COMPLEX_BINDING		114	-0.264712	-1.15866	0.140969	0.414941	1	2373	tags=38%, list=30%, signal=53%
GOMF_UBIQUITIN_LIKE_PROTEIN_SPECIFIC_PROTEASE_ACTIVITY	GOMF_UBIQUITIN_LIKE_PROTEIN_SPECIFIC_PROTEASE_ACTIVITY		17	-0.401007	-1.15616	0.243038	0.416492	1	918	tags=29%, list=12%, signal=33%
GOMF_ACETYLTRANSFERASE_ACTIVITY	GOMF_ACETYLTRANSFERASE_ACTIVITY		61	-0.299984	-1.14632	0.248201	0.432234	1	2578	tags=48%, list=32%, signal=70%
GOMF_DNA_BINDING_TRANSCRIPTION_ACTIVATOR_ACTIVITY	GOMF_DNA_BINDING_TRANSCRIPTION_ACTIVATOR_ACTIVITY		126	-0.256753	-1.14435	0.157895	0.432293	1	1417	tags=25%, list=18%, signal=29%
GOMF_ATP_DEPENDENT_MICROTUBULE_MOTOR_ACTIVITY	GOMF_ATP_DEPENDENT_MICROTUBULE_MOTOR_ACTIVITY		17	-0.399824	-1.13981	0.275949	0.437556	1	2453	tags=59%, list=31%, signal=85%
GOMF_RRNA_BINDING	GOMF_RRNA_BINDING		58	-0.296394	-1.13711	0.215328	0.438693	1	1394	tags=24%, list=17%, signal=29%
GOMF_CYTOKINE_BINDING	GOMF_CYTOKINE_BINDING		32	-0.334884	-1.13109	0.275316	0.44706	1	403	tags=19%, list=5%, signal=20%
GOMF_UBIQUITIN_CONJUGATING_ENZYME_BINDING	GOMF_UBIQUITIN_CONJUGATING_ENZYME_BINDING		20	-0.365414	-1.13093	0.287263	0.443607	1	1475	tags=40%, list=19%, signal=49%
GOMF_HSP90_PROTEIN_BINDING	GOMF_HSP90_PROTEIN_BINDING		27	-0.35062	-1.13033	0.283854	0.441143	1	761	tags=26%, list=10%, signal=29%
GOMF_UBIQUITIN_LIKE_PROTEIN_LIGASE_BINDING	GOMF_UBIQUITIN_LIKE_PROTEIN_LIGASE_BINDING		216	-0.237892	-1.12707	0.146067	0.443934	1	1232	tags=22%, list=15%, signal=25%
GOMF_MRNA_3_UTR_AU_RICH_REGION_BINDING	GOMF_MRNA_3_UTR_AU_RICH_REGION_BINDING		16	-0.402221	-1.12001	0.293963	0.454949	1	1740	tags=38%, list=22%, signal=48%
GOMF_DNA_BINDING_TRANSCRIPTION_FACTOR_ACTIVITY	GOMF_DNA_BINDING_TRANSCRIPTION_FACTOR_ACTIVITY		311	-0.226696	-1.11782	0.107438	0.455891	1	1429	tags=25%, list=18%, signal=29%
GOMF_ANTIOXIDANT_ACTIVITY	GOMF_ANTIOXIDANT_ACTIVITY		39	-0.320704	-1.1116	0.264706	0.465311	1	697	tags=23%, list=9%, signal=25%
GOMF_TRANSFERASE_ACTIVITY_TRANSFERRING_ONE_CARBON_GROUPS	GOMF_TRANSFERASE_ACTIVITY_TRANSFERRING_ONE_CARBON_GROUPS		152	-0.246579	-1.10626	0.23431	0.472686	1	2435	tags=41%, list=31%, signal=59%
GOMF_OXIDOREDUCTASE_ACTIVITY_ACTING_ON_THE_ALDEHYDE_OR_OXO_GROUP_OF_DONORS_NAD_OR_NADP_AS_ACCEPTOR	GOMF_OXIDOREDUCTASE_ACTIVITY_ACTING_ON_THE_ALDEHYDE_OR_OXO_GROUP_OF_DONORS_NAD_OR_NADP_AS_ACCEPTOR		30	-0.338658	-1.10585	0.279279	0.469926	1	1075	tags=23%, list=13%, signal=27%
GOMF_S_ADENOSYLMETHIONINE_DEPENDENT_METHYLTRANSFERASE_ACTIVITY	GOMF_S_ADENOSYLMETHIONINE_DEPENDENT_METHYLTRANSFERASE_ACTIVITY		113	-0.25029	-1.10085	0.215768	0.476168	1	2435	tags=40%, list=31%, signal=57%
GOMF_UBIQUITIN_SPECIFIC_PROTEASE_BINDING	GOMF_UBIQUITIN_SPECIFIC_PROTEASE_BINDING		18	-0.365972	-1.09986	0.31565	0.474675	1	1455	tags=33%, list=18%, signal=41%
GOMF_OMEGA_PEPTIDASE_ACTIVITY	GOMF_OMEGA_PEPTIDASE_ACTIVITY		62	-0.281377	-1.09869	0.269784	0.473545	1	2250	tags=44%, list=28%, signal=60%
GOMF_DYNEIN_COMPLEX_BINDING	GOMF_DYNEIN_COMPLEX_BINDING		15	-0.392929	-1.08613	0.31565	0.497319	1	1448	tags=33%, list=18%, signal=41%
GOMF_ZINC_ION_BINDING	GOMF_ZINC_ION_BINDING		398	-0.214484	-1.08135	0.184466	0.503862	1	1422	tags=23%, list=18%, signal=27%
GOMF_N_METHYLTRANSFERASE_ACTIVITY	GOMF_N_METHYLTRANSFERASE_ACTIVITY		65	-0.279131	-1.07834	0.325581	0.506752	1	2375	tags=38%, list=30%, signal=54%
GOMF_PROTEIN_KINASE_C_BINDING	GOMF_PROTEIN_KINASE_C_BINDING		32	-0.315617	-1.07221	0.33908	0.516961	1	438	tags=13%, list=5%, signal=13%
GOMF_HORMONE_RECEPTOR_BINDING	GOMF_HORMONE_RECEPTOR_BINDING		107	-0.252212	-1.07122	0.305677	0.515305	1	1810	tags=30%, list=23%, signal=38%
GOMF_RNA_POLYMERASE_CORE_ENZYME_BINDING	GOMF_RNA_POLYMERASE_CORE_ENZYME_BINDING		38	-0.30403	-1.06964	0.347973	0.515074	1	2428	tags=47%, list=30%, signal=68%
GOMF_HISTONE_BINDING	GOMF_HISTONE_BINDING		164	-0.232201	-1.06501	0.322751	0.521713	1	2376	tags=37%, list=30%, signal=51%
GOMF_DRUG_BINDING	GOMF_DRUG_BINDING		32	-0.310691	-1.05378	0.356495	0.542869	1	810	tags=19%, list=10%, signal=21%
GOMF_ANDROGEN_RECEPTOR_BINDING	GOMF_ANDROGEN_RECEPTOR_BINDING		20	-0.35228	-1.05085	0.376022	0.545409	1	1511	tags=30%, list=19%, signal=37%
GOMF_MOTOR_ACTIVITY	GOMF_MOTOR_ACTIVITY		73	-0.258443	-1.0388	0.371324	0.569156	1	1894	tags=40%, list=24%, signal=52%
GOMF_TAU_PROTEIN_BINDING	GOMF_TAU_PROTEIN_BINDING		31	-0.306438	-1.03353	0.388889	0.57785	1	744	tags=19%, list=9%, signal=21%
GOMF_ALPHA_TUBULIN_BINDING	GOMF_ALPHA_TUBULIN_BINDING		21	-0.330534	-1.02126	0.426997	0.603001	1	1770	tags=43%, list=22%, signal=55%
GOMF_PROTEIN_KINASE_A_BINDING	GOMF_PROTEIN_KINASE_A_BINDING		27	-0.312035	-1.01758	0.416185	0.607976	1	1880	tags=33%, list=24%, signal=43%
GOMF_ENZYME_INHIBITOR_ACTIVITY	GOMF_ENZYME_INHIBITOR_ACTIVITY		162	-0.221271	-1.0138	0.39726	0.612945	1	1545	tags=28%, list=19%, signal=34%
GOMF_RIBONUCLEASE_ACTIVITY	GOMF_RIBONUCLEASE_ACTIVITY		78	-0.250759	-1.00513	0.433333	0.630105	1	2310	tags=38%, list=29%, signal=54%
GOMF_PHOSPHATASE_REGULATOR_ACTIVITY	GOMF_PHOSPHATASE_REGULATOR_ACTIVITY		55	-0.267854	-1.004	0.448505	0.628606	1	1229	tags=27%, list=15%, signal=32%
GOMF_PROTEIN_N_TERMINUS_BINDING	GOMF_PROTEIN_N_TERMINUS_BINDING		80	-0.244291	-1.00293	0.419231	0.626843	1	554	tags=11%, list=7%, signal=12%
GOMF_LYSINE_ACETYLATED_HISTONE_BINDING	GOMF_LYSINE_ACETYLATED_HISTONE_BINDING		18	-0.346411	-0.999112	0.420103	0.632086	1	2376	tags=50%, list=30%, signal=71%
GOMF_MAGNESIUM_ION_BINDING	GOMF_MAGNESIUM_ION_BINDING		144	-0.223078	-0.997329	0.451282	0.632196	1	844	tags=13%, list=11%, signal=14%
GOMF_TUBULIN_BINDING	GOMF_TUBULIN_BINDING		211	-0.204944	-0.979161	0.578313	0.673784	1	1770	tags=28%, list=22%, signal=36%
GOMF_SMAD_BINDING	GOMF_SMAD_BINDING		42	-0.26833	-0.966731	0.505017	0.700794	1	1619	tags=24%, list=20%, signal=30%
GOMF_UBIQUITIN_LIKE_PROTEIN_CONJUGATING_ENZYME_ACTIVITY	GOMF_UBIQUITIN_LIKE_PROTEIN_CONJUGATING_ENZYME_ACTIVITY		22	-0.314671	-0.961323	0.506631	0.709769	1	1972	tags=41%, list=25%, signal=54%
GOMF_ISOPEPTIDASE_ACTIVITY	GOMF_ISOPEPTIDASE_ACTIVITY		16	-0.341139	-0.956056	0.5	0.718586	1	739	tags=25%, list=9%, signal=28%
GOMF_PROMOTER_SPECIFIC_CHROMATIN_BINDING	GOMF_PROMOTER_SPECIFIC_CHROMATIN_BINDING		39	-0.27197	-0.953487	0.531353	0.720832	1	2264	tags=41%, list=28%, signal=57%
GOMF_RNA_POLYMERASE_II_TRANSCRIPTION_FACTOR_BINDING	GOMF_RNA_POLYMERASE_II_TRANSCRIPTION_FACTOR_BINDING		25	-0.299408	-0.952462	0.5	0.718833	1	1638	tags=40%, list=21%, signal=50%
GOMF_NUCLEAR_RECEPTOR_COACTIVATOR_ACTIVITY	GOMF_NUCLEAR_RECEPTOR_COACTIVATOR_ACTIVITY		46	-0.261461	-0.941197	0.584848	0.742589	1	1768	tags=26%, list=22%, signal=33%
GOMF_CYCLIN_DEPENDENT_PROTEIN_KINASE_ACTIVITY	GOMF_CYCLIN_DEPENDENT_PROTEIN_KINASE_ACTIVITY		18	-0.328993	-0.936287	0.52356	0.750309	1	1955	tags=39%, list=25%, signal=51%
GOMF_CORE_PROMOTER_SEQUENCE_SPECIFIC_DNA_BINDING	GOMF_CORE_PROMOTER_SEQUENCE_SPECIFIC_DNA_BINDING		30	-0.270701	-0.92388	0.536111	0.777258	1	998	tags=23%, list=13%, signal=27%
GOMF_CULLIN_FAMILY_PROTEIN_BINDING	GOMF_CULLIN_FAMILY_PROTEIN_BINDING		15	-0.329335	-0.921243	0.567416	0.778969	1	452	tags=13%, list=6%, signal=14%
GOMF_OXIDOREDUCTASE_ACTIVITY_ACTING_ON_THE_ALDEHYDE_OR_OXO_GROUP_OF_DONORS	GOMF_OXIDOREDUCTASE_ACTIVITY_ACTING_ON_THE_ALDEHYDE_OR_OXO_GROUP_OF_DONORS		34	-0.277373	-0.920963	0.566372	0.774742	1	1075	tags=21%, list=13%, signal=24%
GOMF_AMINO_ACID_BINDING	GOMF_AMINO_ACID_BINDING		22	-0.301816	-0.920245	0.567123	0.771879	1	687	tags=23%, list=9%, signal=25%
GOMF_OXIDOREDUCTASE_ACTIVITY_ACTING_ON_PEROXIDE_AS_ACCEPTOR	GOMF_OXIDOREDUCTASE_ACTIVITY_ACTING_ON_PEROXIDE_AS_ACCEPTOR		22	-0.296017	-0.920068	0.57754	0.767613	1	942	tags=27%, list=12%, signal=31%
GOMF_HISTONE_METHYLTRANSFERASE_ACTIVITY	GOMF_HISTONE_METHYLTRANSFERASE_ACTIVITY		43	-0.255691	-0.915041	0.60241	0.775325	1	2352	tags=40%, list=30%, signal=56%
GOMF_TUMOR_NECROSIS_FACTOR_RECEPTOR_SUPERFAMILY_BINDING	GOMF_TUMOR_NECROSIS_FACTOR_RECEPTOR_SUPERFAMILY_BINDING		22	-0.300433	-0.913791	0.561798	0.773636	1	1579	tags=32%, list=20%, signal=40%
GOMF_RNA_CAP_BINDING	GOMF_RNA_CAP_BINDING		17	-0.315954	-0.909452	0.592493	0.77876	1	1983	tags=41%, list=25%, signal=55%
GOMF_MICROTUBULE_PLUS_END_BINDING	GOMF_MICROTUBULE_PLUS_END_BINDING		19	-0.31031	-0.90605	0.571046	0.78238	1	1561	tags=32%, list=20%, signal=39%
GOMF_ENDORIBONUCLEASE_ACTIVITY_PRODUCING_5_PHOSPHOMONOESTERS	GOMF_ENDORIBONUCLEASE_ACTIVITY_PRODUCING_5_PHOSPHOMONOESTERS		21	-0.297741	-0.893051	0.581395	0.808318	1	2539	tags=43%, list=32%, signal=63%
GOMF_KINASE_INHIBITOR_ACTIVITY	GOMF_KINASE_INHIBITOR_ACTIVITY		38	-0.253487	-0.889167	0.668675	0.813111	1	1723	tags=34%, list=22%, signal=43%
GOMF_RNA_POLYMERASE_II_TRANSCRIPTION_COREGULATOR_BINDING	GOMF_RNA_POLYMERASE_II_TRANSCRIPTION_COREGULATOR_BINDING		18	-0.294982	-0.885051	0.625	0.817819	1	3059	tags=67%, list=38%, signal=108%
GOMF_NUCLEOSOME_BINDING	GOMF_NUCLEOSOME_BINDING		56	-0.231771	-0.873866	0.690236	0.83849	1	2123	tags=36%, list=27%, signal=48%
GOMF_ATPASE_ACTIVITY	GOMF_ATPASE_ACTIVITY		334	-0.175444	-0.87095	0.898148	0.839885	1	1806	tags=28%, list=23%, signal=35%
GOMF_TELOMERASE_RNA_BINDING	GOMF_TELOMERASE_RNA_BINDING		20	-0.288638	-0.863766	0.651715	0.850283	1	816	tags=15%, list=10%, signal=17%
GOMF_TRANSFERASE_ACTIVITY_TRANSFERRING_PENTOSYL_GROUPS	GOMF_TRANSFERASE_ACTIVITY_TRANSFERRING_PENTOSYL_GROUPS		29	-0.26066	-0.862942	0.669643	0.847069	1	8	tags=3%, list=0%, signal=3%
GOMF_ENDONUCLEASE_ACTIVITY_ACTIVE_WITH_EITHER_RIBO_OR_DEOXYRIBONUCLEIC_ACIDS_AND_PRODUCING_5_PHOSPHOMONOESTERS	GOMF_ENDONUCLEASE_ACTIVITY_ACTIVE_WITH_EITHER_RIBO_OR_DEOXYRIBONUCLEIC_ACIDS_AND_PRODUCING_5_PHOSPHOMONOESTERS		27	-0.268475	-0.860048	0.6759	0.848368	1	2539	tags=48%, list=32%, signal=70%
GOMF_DNA_BINDING_TRANSCRIPTION_REPRESSOR_ACTIVITY	GOMF_DNA_BINDING_TRANSCRIPTION_REPRESSOR_ACTIVITY		87	-0.212576	-0.857973	0.8	0.848035	1	1429	tags=23%, list=18%, signal=28%
GOMF_SNRNA_BINDING	GOMF_SNRNA_BINDING		41	-0.245769	-0.857312	0.712575	0.844792	1	1161	tags=20%, list=15%, signal=23%
GOMF_LYSINE_N_METHYLTRANSFERASE_ACTIVITY	GOMF_LYSINE_N_METHYLTRANSFERASE_ACTIVITY		43	-0.233363	-0.840431	0.720859	0.874331	1	2375	tags=37%, list=30%, signal=53%
GOMF_TELOMERIC_DNA_BINDING	GOMF_TELOMERIC_DNA_BINDING		29	-0.250801	-0.839518	0.709199	0.871358	1	1520	tags=21%, list=19%, signal=25%
GOMF_CYTOKINE_ACTIVITY	GOMF_CYTOKINE_ACTIVITY		16	-0.291817	-0.835038	0.696658	0.875335	1	1486	tags=38%, list=19%, signal=46%
GOMF_INSULIN_RECEPTOR_BINDING	GOMF_INSULIN_RECEPTOR_BINDING		16	-0.289224	-0.826694	0.710526	0.886079	1	728	tags=13%, list=9%, signal=14%
GOMF_O_METHYLTRANSFERASE_ACTIVITY	GOMF_O_METHYLTRANSFERASE_ACTIVITY		16	-0.292118	-0.823791	0.737401	0.886668	1	2144	tags=56%, list=27%, signal=77%
GOMF_DEOXYRIBONUCLEASE_ACTIVITY	GOMF_DEOXYRIBONUCLEASE_ACTIVITY		39	-0.230421	-0.81247	0.807927	0.902086	1	1287	tags=21%, list=16%, signal=24%
GOMF_TRANSCRIPTION_COREGULATOR_BINDING	GOMF_TRANSCRIPTION_COREGULATOR_BINDING		38	-0.22776	-0.800928	0.785294	0.917297	1	2066	tags=29%, list=26%, signal=39%
GOMF_LIGASE_ACTIVITY_FORMING_CARBON_OXYGEN_BONDS	GOMF_LIGASE_ACTIVITY_FORMING_CARBON_OXYGEN_BONDS		40	-0.226621	-0.800339	0.791798	0.913435	1	1548	tags=25%, list=19%, signal=31%
GOMF_RIBOSOME_BINDING	GOMF_RIBOSOME_BINDING		50	-0.21667	-0.800291	0.849231	0.908589	1	1583	tags=24%, list=20%, signal=30%
GOMF_3_5_DNA_HELICASE_ACTIVITY	GOMF_3_5_DNA_HELICASE_ACTIVITY		15	-0.287445	-0.798348	0.739011	0.906947	1	2647	tags=53%, list=33%, signal=80%
GOMF_CATALYTIC_ACTIVITY_ACTING_ON_A_RRNA	GOMF_CATALYTIC_ACTIVITY_ACTING_ON_A_RRNA		19	-0.272457	-0.793918	0.745902	0.909214	1	1919	tags=37%, list=24%, signal=48%
GOMF_LIGAND_ACTIVATED_TRANSCRIPTION_FACTOR_ACTIVITY	GOMF_LIGAND_ACTIVATED_TRANSCRIPTION_FACTOR_ACTIVITY		17	-0.27577	-0.788796	0.774611	0.912407	1	1833	tags=41%, list=23%, signal=53%
GOMF_SIGNALING_RECEPTOR_COMPLEX_ADAPTOR_ACTIVITY	GOMF_SIGNALING_RECEPTOR_COMPLEX_ADAPTOR_ACTIVITY		24	-0.246781	-0.773292	0.795918	0.930343	1	627	tags=13%, list=8%, signal=14%
GOMF_SINGLE_STRANDED_RNA_BINDING	GOMF_SINGLE_STRANDED_RNA_BINDING		65	-0.196727	-0.768865	0.904605	0.931482	1	1028	tags=12%, list=13%, signal=14%
GOMF_SNAP_RECEPTOR_ACTIVITY	GOMF_SNAP_RECEPTOR_ACTIVITY		30	-0.22913	-0.766239	0.847645	0.930107	1	1399	tags=20%, list=18%, signal=24%
GOMF_PROTEIN_PHOSPHORYLATED_AMINO_ACID_BINDING	GOMF_PROTEIN_PHOSPHORYLATED_AMINO_ACID_BINDING		36	-0.22169	-0.764425	0.832335	0.927665	1	624	tags=11%, list=8%, signal=12%
GOMF_POTASSIUM_CHANNEL_REGULATOR_ACTIVITY	GOMF_POTASSIUM_CHANNEL_REGULATOR_ACTIVITY		19	-0.250204	-0.759853	0.816754	0.929106	1	1556	tags=37%, list=20%, signal=46%
GOMF_PHOSPHOPROTEIN_BINDING	GOMF_PHOSPHOPROTEIN_BINDING		56	-0.194397	-0.754199	0.903571	0.931372	1	1667	tags=23%, list=21%, signal=29%
GOMF_FIBROBLAST_GROWTH_FACTOR_BINDING	GOMF_FIBROBLAST_GROWTH_FACTOR_BINDING		15	-0.267972	-0.748193	0.807588	0.933998	1	2159	tags=33%, list=27%, signal=46%
GOMF_KINASE_REGULATOR_ACTIVITY	GOMF_KINASE_REGULATOR_ACTIVITY		117	-0.175094	-0.748125	0.986047	0.929299	1	1525	tags=24%, list=19%, signal=29%
GOMF_CARBOXY_LYASE_ACTIVITY	GOMF_CARBOXY_LYASE_ACTIVITY		23	-0.232381	-0.727	0.874286	0.948534	1	30	tags=4%, list=0%, signal=4%
GOMF_HISTONE_LYSINE_N_METHYLTRANSFERASE_ACTIVITY	GOMF_HISTONE_LYSINE_N_METHYLTRANSFERASE_ACTIVITY		36	-0.210874	-0.717685	0.908555	0.952548	1	2352	tags=36%, list=30%, signal=51%
GOMF_ENDORIBONUCLEASE_ACTIVITY	GOMF_ENDORIBONUCLEASE_ACTIVITY		41	-0.202417	-0.710323	0.923977	0.955136	1	1619	tags=22%, list=20%, signal=27%
GOMF_SINGLE_STRANDED_DNA_HELICASE_ACTIVITY	GOMF_SINGLE_STRANDED_DNA_HELICASE_ACTIVITY		15	-0.261109	-0.705069	0.869898	0.95514	1	2647	tags=67%, list=33%, signal=100%
GOMF_STRUCTURAL_CONSTITUENT_OF_RIBOSOME	GOMF_STRUCTURAL_CONSTITUENT_OF_RIBOSOME		136	-0.157258	-0.69443	0.995763	0.95959	1	1651	tags=17%, list=21%, signal=21%
GOMF_CYCLIN_BINDING	GOMF_CYCLIN_BINDING		20	-0.221002	-0.66948	0.908078	0.97313	1	1955	tags=40%, list=25%, signal=53%
GOMF_PRE_MRNA_BINDING	GOMF_PRE_MRNA_BINDING		27	-0.199212	-0.655339	0.945205	0.977685	1	713	tags=7%, list=9%, signal=8%
GOMF_RNA_POLYMERASE_II_TRANSCRIPTION_COREPRESSOR_BINDING	GOMF_RNA_POLYMERASE_II_TRANSCRIPTION_COREPRESSOR_BINDING		15	-0.233072	-0.65493	0.901809	0.973166	1	3059	tags=67%, list=38%, signal=108%
GOMF_PROTEIN_SERINE_THREONINE_TYROSINE_KINASE_ACTIVITY	GOMF_PROTEIN_SERINE_THREONINE_TYROSINE_KINASE_ACTIVITY		26	-0.204413	-0.642641	0.950867	0.975758	1	1432	tags=19%, list=18%, signal=23%
GOMF_TRANSLATION_ELONGATION_FACTOR_ACTIVITY	GOMF_TRANSLATION_ELONGATION_FACTOR_ACTIVITY		16	-0.226824	-0.620686	0.928922	0.981357	1	1234	tags=25%, list=15%, signal=30%
GOMF_HYDROLASE_ACTIVITY_ACTING_ON_CARBON_NITROGEN_BUT_NOT_PEPTIDE_BONDS_IN_CYCLIC_AMIDINES	GOMF_HYDROLASE_ACTIVITY_ACTING_ON_CARBON_NITROGEN_BUT_NOT_PEPTIDE_BONDS_IN_CYCLIC_AMIDINES		16	-0.208021	-0.581399	0.960422	0.990156	1	584	tags=13%, list=7%, signal=13%
GOMF_INTRAMOLECULAR_TRANSFERASE_ACTIVITY	GOMF_INTRAMOLECULAR_TRANSFERASE_ACTIVITY		20	-0.185151	-0.550669	0.970899	0.992552	1	1370	tags=15%, list=17%, signal=18%
GOMF_POLY_PURINE_TRACT_BINDING	GOMF_POLY_PURINE_TRACT_BINDING		20	-0.182093	-0.544465	0.979472	0.989005	1	2335	tags=40%, list=29%, signal=56%

## Sheet: KEGG_up_in_sgNCOA4-1
NAME	GS<br> follow link to MSigDB	GS DETAILS	SIZE	ES	NES	NOM p-val	FDR q-val	FWER p-val	RANK AT MAX	LEADING EDGE
KEGG_CALCIUM_SIGNALING_PATHWAY	KEGG_CALCIUM_SIGNALING_PATHWAY	Details ...	51	0.602247	1.98593	0	0.00604313	0.006	1950	tags=61%, list=24%, signal=80%
KEGG_RETINOL_METABOLISM	KEGG_RETINOL_METABOLISM	Details ...	15	0.779497	1.96897	0	0.00404886	0.008	1150	tags=67%, list=14%, signal=78%
KEGG_ARACHIDONIC_ACID_METABOLISM	KEGG_ARACHIDONIC_ACID_METABOLISM	Details ...	18	0.714364	1.90858	0	0.00902162	0.026	1026	tags=39%, list=13%, signal=45%
KEGG_DRUG_METABOLISM_CYTOCHROME_P450	KEGG_DRUG_METABOLISM_CYTOCHROME_P450	Details ...	22	0.676808	1.90097	0	0.00803374	0.031	996	tags=59%, list=13%, signal=67%
KEGG_GLYCEROPHOSPHOLIPID_METABOLISM	KEGG_GLYCEROPHOSPHOLIPID_METABOLISM	Details ...	41	0.587652	1.89767	0	0.00662912	0.032	1360	tags=49%, list=17%, signal=59%
KEGG_LONG_TERM_DEPRESSION	KEGG_LONG_TERM_DEPRESSION	Details ...	31	0.61954	1.8915	0.00155521	0.00570626	0.033	1605	tags=55%, list=20%, signal=68%
KEGG_GAP_JUNCTION	KEGG_GAP_JUNCTION	Details ...	44	0.58417	1.88965	0	0.00502817	0.034	1778	tags=48%, list=22%, signal=61%
KEGG_GNRH_SIGNALING_PATHWAY	KEGG_GNRH_SIGNALING_PATHWAY	Details ...	54	0.544018	1.85048	0	0.00800279	0.062	1909	tags=50%, list=24%, signal=65%
KEGG_ABC_TRANSPORTERS	KEGG_ABC_TRANSPORTERS	Details ...	20	0.659769	1.80583	0.00315956	0.0114133	0.098	907	tags=45%, list=11%, signal=51%
KEGG_SPHINGOLIPID_METABOLISM	KEGG_SPHINGOLIPID_METABOLISM	Details ...	23	0.635687	1.78262	0	0.0150173	0.141	2203	tags=70%, list=28%, signal=96%
KEGG_ARGININE_AND_PROLINE_METABOLISM	KEGG_ARGININE_AND_PROLINE_METABOLISM	Details ...	36	0.572465	1.774	0.00294551	0.0153304	0.154	607	tags=28%, list=8%, signal=30%
KEGG_VASCULAR_SMOOTH_MUSCLE_CONTRACTION	KEGG_VASCULAR_SMOOTH_MUSCLE_CONTRACTION	Details ...	45	0.523736	1.72462	0.00149031	0.0248855	0.251	1896	tags=47%, list=24%, signal=61%
KEGG_LYSOSOME	KEGG_LYSOSOME	Details ...	82	0.470736	1.71496	0.00133511	0.0263	0.284	1254	tags=33%, list=16%, signal=39%
KEGG_CHEMOKINE_SIGNALING_PATHWAY	KEGG_CHEMOKINE_SIGNALING_PATHWAY	Details ...	81	0.467821	1.67441	0	0.037979	0.413	1801	tags=37%, list=23%, signal=47%
KEGG_ECM_RECEPTOR_INTERACTION	KEGG_ECM_RECEPTOR_INTERACTION	Details ...	34	0.53203	1.64523	0.0103397	0.0481552	0.507	501	tags=26%, list=6%, signal=28%
KEGG_GLYCEROLIPID_METABOLISM	KEGG_GLYCEROLIPID_METABOLISM	Details ...	28	0.543022	1.62084	0.009375	0.0591596	0.602	1303	tags=43%, list=16%, signal=51%
KEGG_O_GLYCAN_BIOSYNTHESIS	KEGG_O_GLYCAN_BIOSYNTHESIS	Details ...	16	0.63112	1.6198	0.0228385	0.0563279	0.607	1374	tags=44%, list=17%, signal=53%
KEGG_STARCH_AND_SUCROSE_METABOLISM	KEGG_STARCH_AND_SUCROSE_METABOLISM	Details ...	19	0.588918	1.61469	0.02	0.0560481	0.627	1077	tags=42%, list=14%, signal=49%
KEGG_LEUKOCYTE_TRANSENDOTHELIAL_MIGRATION	KEGG_LEUKOCYTE_TRANSENDOTHELIAL_MIGRATION	Details ...	50	0.484149	1.61183	0.0131387	0.0547437	0.639	1726	tags=42%, list=22%, signal=53%
KEGG_N_GLYCAN_BIOSYNTHESIS	KEGG_N_GLYCAN_BIOSYNTHESIS	Details ...	31	0.513764	1.55407	0.016692	0.0907187	0.821	2255	tags=55%, list=28%, signal=76%
KEGG_VALINE_LEUCINE_AND_ISOLEUCINE_DEGRADATION	KEGG_VALINE_LEUCINE_AND_ISOLEUCINE_DEGRADATION		38	0.48718	1.51441	0.0242792	0.123643	0.919	1903	tags=50%, list=24%, signal=65%
KEGG_METABOLISM_OF_XENOBIOTICS_BY_CYTOCHROME_P450	KEGG_METABOLISM_OF_XENOBIOTICS_BY_CYTOCHROME_P450		26	0.518342	1.509	0.0226586	0.12277	0.925	996	tags=46%, list=13%, signal=53%
KEGG_CYTOKINE_CYTOKINE_RECEPTOR_INTERACTION	KEGG_CYTOKINE_CYTOKINE_RECEPTOR_INTERACTION		29	0.508532	1.50681	0.027439	0.119299	0.927	1570	tags=48%, list=20%, signal=60%
KEGG_FATTY_ACID_METABOLISM	KEGG_FATTY_ACID_METABOLISM		31	0.493702	1.4955	0.0288754	0.124843	0.942	2262	tags=55%, list=28%, signal=76%
KEGG_FOCAL_ADHESION	KEGG_FOCAL_ADHESION		109	0.395675	1.48415	0.0172643	0.130895	0.959	1856	tags=30%, list=23%, signal=39%
KEGG_PHOSPHATIDYLINOSITOL_SIGNALING_SYSTEM	KEGG_PHOSPHATIDYLINOSITOL_SIGNALING_SYSTEM		50	0.447332	1.47376	0.030479	0.136393	0.971	2103	tags=42%, list=26%, signal=57%
KEGG_PEROXISOME	KEGG_PEROXISOME		58	0.428873	1.45889	0.0287356	0.146526	0.982	2262	tags=55%, list=28%, signal=76%
KEGG_COMPLEMENT_AND_COAGULATION_CASCADES	KEGG_COMPLEMENT_AND_COAGULATION_CASCADES		18	0.526004	1.4106	0.0768	0.199802	0.997	1091	tags=44%, list=14%, signal=51%
KEGG_MELANOGENESIS	KEGG_MELANOGENESIS		40	0.428739	1.36964	0.0895742	0.255098	1	1778	tags=45%, list=22%, signal=58%
KEGG_NATURAL_KILLER_CELL_MEDIATED_CYTOTOXICITY	KEGG_NATURAL_KILLER_CELL_MEDIATED_CYTOTOXICITY		53	0.400057	1.36404	0.0657143	0.25542	1	1726	tags=34%, list=22%, signal=43%
KEGG_AMINO_SUGAR_AND_NUCLEOTIDE_SUGAR_METABOLISM	KEGG_AMINO_SUGAR_AND_NUCLEOTIDE_SUGAR_METABOLISM		39	0.421467	1.34894	0.0730594	0.27056	1	2304	tags=46%, list=29%, signal=65%
KEGG_ENDOCYTOSIS	KEGG_ENDOCYTOSIS		126	0.350552	1.34264	0.03861	0.273508	1	2307	tags=37%, list=29%, signal=52%
KEGG_LONG_TERM_POTENTIATION	KEGG_LONG_TERM_POTENTIATION		35	0.432284	1.33845	0.10241	0.272158	1	1778	tags=34%, list=22%, signal=44%
KEGG_ARRHYTHMOGENIC_RIGHT_VENTRICULAR_CARDIOMYOPATHY_ARVC	KEGG_ARRHYTHMOGENIC_RIGHT_VENTRICULAR_CARDIOMYOPATHY_ARVC		28	0.454331	1.33829	0.109698	0.264556	1	2180	tags=61%, list=27%, signal=83%
KEGG_DRUG_METABOLISM_OTHER_ENZYMES	KEGG_DRUG_METABOLISM_OTHER_ENZYMES		21	0.481001	1.33319	0.133122	0.2658	1	1547	tags=52%, list=19%, signal=65%
KEGG_PROPANOATE_METABOLISM	KEGG_PROPANOATE_METABOLISM		26	0.460672	1.32002	0.14619	0.279355	1	1248	tags=38%, list=16%, signal=45%
KEGG_DILATED_CARDIOMYOPATHY	KEGG_DILATED_CARDIOMYOPATHY		31	0.430297	1.31866	0.115741	0.274157	1	2180	tags=65%, list=27%, signal=88%
KEGG_BUTANOATE_METABOLISM	KEGG_BUTANOATE_METABOLISM		26	0.444713	1.31151	0.126365	0.280045	1	1422	tags=42%, list=18%, signal=51%
KEGG_AXON_GUIDANCE	KEGG_AXON_GUIDANCE		69	0.36884	1.30083	0.0980926	0.290133	1	1652	tags=33%, list=21%, signal=42%
KEGG_TIGHT_JUNCTION	KEGG_TIGHT_JUNCTION		72	0.361052	1.28477	0.0995962	0.310597	1	1676	tags=31%, list=21%, signal=38%
KEGG_SMALL_CELL_LUNG_CANCER	KEGG_SMALL_CELL_LUNG_CANCER		50	0.380877	1.25678	0.135174	0.354761	1	2016	tags=32%, list=25%, signal=43%
KEGG_JAK_STAT_SIGNALING_PATHWAY	KEGG_JAK_STAT_SIGNALING_PATHWAY		45	0.387511	1.25498	0.139501	0.349194	1	1726	tags=31%, list=22%, signal=39%
KEGG_FRUCTOSE_AND_MANNOSE_METABOLISM	KEGG_FRUCTOSE_AND_MANNOSE_METABOLISM		29	0.403613	1.19469	0.223903	0.464926	1	1940	tags=41%, list=24%, signal=54%
KEGG_VIBRIO_CHOLERAE_INFECTION	KEGG_VIBRIO_CHOLERAE_INFECTION		29	0.399731	1.16391	0.240188	0.523565	1	2334	tags=48%, list=29%, signal=68%
KEGG_FC_EPSILON_RI_SIGNALING_PATHWAY	KEGG_FC_EPSILON_RI_SIGNALING_PATHWAY		38	0.371063	1.16357	0.253754	0.5129	1	1909	tags=37%, list=24%, signal=48%
KEGG_HYPERTROPHIC_CARDIOMYOPATHY_HCM	KEGG_HYPERTROPHIC_CARDIOMYOPATHY_HCM		30	0.386474	1.14154	0.283048	0.55386	1	2180	tags=53%, list=27%, signal=73%
KEGG_HEMATOPOIETIC_CELL_LINEAGE	KEGG_HEMATOPOIETIC_CELL_LINEAGE		16	0.439712	1.13506	0.30303	0.558283	1	398	tags=31%, list=5%, signal=33%
KEGG_PROTEIN_EXPORT	KEGG_PROTEIN_EXPORT		18	0.428471	1.1292	0.318542	0.56006	1	2417	tags=44%, list=30%, signal=64%
KEGG_CELL_ADHESION_MOLECULES_CAMS	KEGG_CELL_ADHESION_MOLECULES_CAMS		38	0.34877	1.12234	0.311844	0.565034	1	1351	tags=39%, list=17%, signal=47%
KEGG_TYPE_II_DIABETES_MELLITUS	KEGG_TYPE_II_DIABETES_MELLITUS		20	0.382798	1.08437	0.360129	0.646824	1	2178	tags=45%, list=27%, signal=62%
KEGG_BIOSYNTHESIS_OF_UNSATURATED_FATTY_ACIDS	KEGG_BIOSYNTHESIS_OF_UNSATURATED_FATTY_ACIDS		16	0.411498	1.08317	0.373041	0.637176	1	451	tags=25%, list=6%, signal=26%
KEGG_GLUTATHIONE_METABOLISM	KEGG_GLUTATHIONE_METABOLISM		34	0.349406	1.07174	0.366044	0.653897	1	966	tags=24%, list=12%, signal=27%
KEGG_ENDOMETRIAL_CANCER	KEGG_ENDOMETRIAL_CANCER		40	0.340445	1.07145	0.355072	0.64244	1	1801	tags=28%, list=23%, signal=35%
KEGG_GLIOMA	KEGG_GLIOMA		38	0.340088	1.05791	0.365889	0.663216	1	2641	tags=45%, list=33%, signal=67%
KEGG_ADHERENS_JUNCTION	KEGG_ADHERENS_JUNCTION		51	0.310627	1.04588	0.398256	0.68062	1	1827	tags=25%, list=23%, signal=33%
KEGG_TRYPTOPHAN_METABOLISM	KEGG_TRYPTOPHAN_METABOLISM		22	0.376086	1.04291	0.408585	0.676027	1	2011	tags=45%, list=25%, signal=61%
KEGG_VASOPRESSIN_REGULATED_WATER_REABSORPTION	KEGG_VASOPRESSIN_REGULATED_WATER_REABSORPTION		30	0.348927	1.04205	0.396226	0.666467	1	1943	tags=43%, list=24%, signal=57%
KEGG_ADIPOCYTOKINE_SIGNALING_PATHWAY	KEGG_ADIPOCYTOKINE_SIGNALING_PATHWAY		39	0.327217	1.0398	0.411765	0.659843	1	2340	tags=33%, list=29%, signal=47%
KEGG_GLYCOLYSIS_GLUCONEOGENESIS	KEGG_GLYCOLYSIS_GLUCONEOGENESIS		42	0.320377	1.03183	0.422287	0.668062	1	1940	tags=40%, list=24%, signal=53%
KEGG_BASAL_CELL_CARCINOMA	KEGG_BASAL_CELL_CARCINOMA		15	0.397608	1.01916	0.474715	0.686095	1	765	tags=27%, list=10%, signal=29%
KEGG_B_CELL_RECEPTOR_SIGNALING_PATHWAY	KEGG_B_CELL_RECEPTOR_SIGNALING_PATHWAY		42	0.317947	1.00835	0.461883	0.699648	1	2718	tags=40%, list=34%, signal=61%
KEGG_REGULATION_OF_ACTIN_CYTOSKELETON	KEGG_REGULATION_OF_ACTIN_CYTOSKELETON		120	0.258388	0.991657	0.473958	0.72809	1	2677	tags=38%, list=34%, signal=57%
KEGG_ALANINE_ASPARTATE_AND_GLUTAMATE_METABOLISM	KEGG_ALANINE_ASPARTATE_AND_GLUTAMATE_METABOLISM		24	0.343763	0.990184	0.468454	0.71986	1	548	tags=21%, list=7%, signal=22%
KEGG_INOSITOL_PHOSPHATE_METABOLISM	KEGG_INOSITOL_PHOSPHATE_METABOLISM		41	0.302941	0.978518	0.499264	0.735663	1	2103	tags=34%, list=26%, signal=46%
KEGG_APOPTOSIS	KEGG_APOPTOSIS		57	0.288655	0.977892	0.498584	0.725655	1	2641	tags=35%, list=33%, signal=52%
KEGG_ERBB_SIGNALING_PATHWAY	KEGG_ERBB_SIGNALING_PATHWAY		62	0.278981	0.95647	0.537143	0.763457	1	1726	tags=27%, list=22%, signal=35%
KEGG_GALACTOSE_METABOLISM	KEGG_GALACTOSE_METABOLISM		18	0.345202	0.924661	0.557994	0.825285	1	1062	tags=22%, list=13%, signal=26%
KEGG_PATHOGENIC_ESCHERICHIA_COLI_INFECTION	KEGG_PATHOGENIC_ESCHERICHIA_COLI_INFECTION		35	0.299235	0.917955	0.572917	0.828738	1	1676	tags=31%, list=21%, signal=40%
KEGG_P53_SIGNALING_PATHWAY	KEGG_P53_SIGNALING_PATHWAY		44	0.277552	0.907197	0.61646	0.841336	1	1260	tags=20%, list=16%, signal=24%
KEGG_RENAL_CELL_CARCINOMA	KEGG_RENAL_CELL_CARCINOMA		48	0.264941	0.86721	0.676177	0.918951	1	1726	tags=21%, list=22%, signal=26%
KEGG_PPAR_SIGNALING_PATHWAY	KEGG_PPAR_SIGNALING_PATHWAY		31	0.288287	0.863582	0.644615	0.914687	1	1725	tags=42%, list=22%, signal=53%
KEGG_TYROSINE_METABOLISM	KEGG_TYROSINE_METABOLISM		19	0.318248	0.860006	0.670866	0.9099	1	267	tags=11%, list=3%, signal=11%
KEGG_PATHWAYS_IN_CANCER	KEGG_PATHWAYS_IN_CANCER		166	0.220642	0.858957	0.775155	0.899547	1	1146	tags=16%, list=14%, signal=18%
KEGG_INSULIN_SIGNALING_PATHWAY	KEGG_INSULIN_SIGNALING_PATHWAY		92	0.232107	0.847007	0.769337	0.912401	1	1778	tags=24%, list=22%, signal=30%
KEGG_BLADDER_CANCER	KEGG_BLADDER_CANCER		25	0.28944	0.83758	0.694529	0.918925	1	1576	tags=24%, list=20%, signal=30%
KEGG_NEUROTROPHIN_SIGNALING_PATHWAY	KEGG_NEUROTROPHIN_SIGNALING_PATHWAY		84	0.231854	0.836617	0.76087	0.908484	1	2318	tags=31%, list=29%, signal=43%
KEGG_MAPK_SIGNALING_PATHWAY	KEGG_MAPK_SIGNALING_PATHWAY		128	0.21329	0.818975	0.841545	0.932006	1	2047	tags=25%, list=26%, signal=33%
KEGG_PORPHYRIN_AND_CHLOROPHYLL_METABOLISM	KEGG_PORPHYRIN_AND_CHLOROPHYLL_METABOLISM		20	0.301453	0.816984	0.723577	0.923609	1	941	tags=20%, list=12%, signal=23%
KEGG_TOLL_LIKE_RECEPTOR_SIGNALING_PATHWAY	KEGG_TOLL_LIKE_RECEPTOR_SIGNALING_PATHWAY		51	0.242277	0.812776	0.766764	0.919872	1	2037	tags=24%, list=26%, signal=31%
KEGG_VEGF_SIGNALING_PATHWAY	KEGG_VEGF_SIGNALING_PATHWAY		41	0.252295	0.79561	0.786982	0.937626	1	1934	tags=27%, list=24%, signal=35%
KEGG_HISTIDINE_METABOLISM	KEGG_HISTIDINE_METABOLISM		18	0.285597	0.769661	0.775701	0.969932	1	1194	tags=33%, list=15%, signal=39%
KEGG_NON_SMALL_CELL_LUNG_CANCER	KEGG_NON_SMALL_CELL_LUNG_CANCER		39	0.236601	0.745456	0.853253	0.993471	1	2641	tags=36%, list=33%, signal=53%
KEGG_PROGESTERONE_MEDIATED_OOCYTE_MATURATION	KEGG_PROGESTERONE_MEDIATED_OOCYTE_MATURATION		55	0.216888	0.732198	0.895349	1	1	2041	tags=29%, list=26%, signal=39%
KEGG_EPITHELIAL_CELL_SIGNALING_IN_HELICOBACTER_PYLORI_INFECTION	KEGG_EPITHELIAL_CELL_SIGNALING_IN_HELICOBACTER_PYLORI_INFECTION		41	0.212078	0.67775	0.934551	1	1	2494	tags=37%, list=31%, signal=53%
KEGG_RIG_I_LIKE_RECEPTOR_SIGNALING_PATHWAY	KEGG_RIG_I_LIKE_RECEPTOR_SIGNALING_PATHWAY		42	0.211284	0.667863	0.930197	1	1	14	tags=2%, list=0%, signal=2%
KEGG_FC_GAMMA_R_MEDIATED_PHAGOCYTOSIS	KEGG_FC_GAMMA_R_MEDIATED_PHAGOCYTOSIS		61	0.189535	0.649196	0.965116	1	1	2677	tags=41%, list=34%, signal=61%
KEGG_T_CELL_RECEPTOR_SIGNALING_PATHWAY	KEGG_T_CELL_RECEPTOR_SIGNALING_PATHWAY		60	0.184447	0.628354	0.974138	1	1	1852	tags=22%, list=23%, signal=28%
KEGG_ALDOSTERONE_REGULATED_SODIUM_REABSORPTION	KEGG_ALDOSTERONE_REGULATED_SODIUM_REABSORPTION		21	0.22174	0.609564	0.961723	1	1	1726	tags=24%, list=22%, signal=30%
KEGG_AMYOTROPHIC_LATERAL_SCLEROSIS_ALS	KEGG_AMYOTROPHIC_LATERAL_SCLEROSIS_ALS		30	0.198765	0.597197	0.967841	1	1	3037	tags=47%, list=38%, signal=75%
KEGG_MELANOMA	KEGG_MELANOMA		30	0.190075	0.565268	0.990991	1	1	3087	tags=43%, list=39%, signal=70%
KEGG_CHRONIC_MYELOID_LEUKEMIA	KEGG_CHRONIC_MYELOID_LEUKEMIA		54	0.158391	0.530776	0.994398	1	1	1726	tags=15%, list=22%, signal=19%
KEGG_SELENOAMINO_ACID_METABOLISM	KEGG_SELENOAMINO_ACID_METABOLISM		19	0.191721	0.51226	0.979233	1	1	974	tags=11%, list=12%, signal=12%
KEGG_PANCREATIC_CANCER	KEGG_PANCREATIC_CANCER		45	0.154987	0.503405	0.998584	1	1	2016	tags=20%, list=25%, signal=27%
KEGG_RIBOSOME	KEGG_RIBOSOME		76	0.130875	0.472923	1	1	1	3227	tags=45%, list=41%, signal=74%
KEGG_COLORECTAL_CANCER	KEGG_COLORECTAL_CANCER		41	0.140731	0.445371	1	0.998638	1	2641	tags=27%, list=33%, signal=40%

## Sheet: KEGG_up_in_sgControl
NAME	GS<br> follow link to MSigDB	GS DETAILS	SIZE	ES	NES	NOM p-val	FDR q-val	FWER p-val	RANK AT MAX	LEADING EDGE
KEGG_BASE_EXCISION_REPAIR	KEGG_BASE_EXCISION_REPAIR	Details ...	25	-0.78778	-2.48518	0	0	0	669	tags=44%, list=8%, signal=48%
KEGG_NUCLEOTIDE_EXCISION_REPAIR	KEGG_NUCLEOTIDE_EXCISION_REPAIR	Details ...	39	-0.625527	-2.2322	0	0.0005	0.001	893	tags=44%, list=11%, signal=49%
KEGG_PYRIMIDINE_METABOLISM	KEGG_PYRIMIDINE_METABOLISM	Details ...	72	-0.536869	-2.15542	0	0.000968946	0.003	747	tags=28%, list=9%, signal=30%
KEGG_RNA_POLYMERASE	KEGG_RNA_POLYMERASE	Details ...	20	-0.698763	-2.13279	0.00268817	0.0012572	0.005	900	tags=35%, list=11%, signal=39%
KEGG_DNA_REPLICATION	KEGG_DNA_REPLICATION	Details ...	32	-0.636925	-2.12311	0	0.00100576	0.005	1977	tags=59%, list=25%, signal=79%
KEGG_PURINE_METABOLISM	KEGG_PURINE_METABOLISM	Details ...	95	-0.469331	-1.95182	0	0.0052225	0.03	1142	tags=32%, list=14%, signal=36%
KEGG_PROTEASOME	KEGG_PROTEASOME	Details ...	40	-0.542777	-1.94081	0.00315457	0.00504113	0.033	2298	tags=63%, list=29%, signal=87%
KEGG_ANTIGEN_PROCESSING_AND_PRESENTATION	KEGG_ANTIGEN_PROCESSING_AND_PRESENTATION	Details ...	43	-0.520394	-1.89397	0	0.00672057	0.05	744	tags=37%, list=9%, signal=41%
KEGG_MISMATCH_REPAIR	KEGG_MISMATCH_REPAIR	Details ...	21	-0.605173	-1.84912	0.00265252	0.00964488	0.079	774	tags=29%, list=10%, signal=32%
KEGG_BASAL_TRANSCRIPTION_FACTORS	KEGG_BASAL_TRANSCRIPTION_FACTORS	Details ...	22	-0.591612	-1.8305	0	0.0101674	0.093	2436	tags=73%, list=31%, signal=104%
KEGG_VIRAL_MYOCARDITIS	KEGG_VIRAL_MYOCARDITIS	Details ...	39	-0.495188	-1.74921	0.00600601	0.0191902	0.185	833	tags=36%, list=10%, signal=40%
KEGG_OXIDATIVE_PHOSPHORYLATION	KEGG_OXIDATIVE_PHOSPHORYLATION	Details ...	80	-0.411503	-1.69454	0	0.0308798	0.309	2071	tags=40%, list=26%, signal=54%
KEGG_THYROID_CANCER	KEGG_THYROID_CANCER	Details ...	21	-0.562817	-1.68506	0.0162162	0.0301635	0.326	1312	tags=24%, list=16%, signal=28%
KEGG_HUNTINGTONS_DISEASE	KEGG_HUNTINGTONS_DISEASE	Details ...	118	-0.390331	-1.6758	0	0.0302555	0.348	1364	tags=27%, list=17%, signal=32%
KEGG_PARKINSONS_DISEASE	KEGG_PARKINSONS_DISEASE	Details ...	79	-0.388171	-1.58946	0.0037037	0.0568423	0.576	2018	tags=39%, list=25%, signal=52%
KEGG_CARDIAC_MUSCLE_CONTRACTION	KEGG_CARDIAC_MUSCLE_CONTRACTION	Details ...	30	-0.483119	-1.58936	0.021021	0.0532897	0.576	1091	tags=30%, list=14%, signal=35%
KEGG_HOMOLOGOUS_RECOMBINATION	KEGG_HOMOLOGOUS_RECOMBINATION	Details ...	23	-0.49789	-1.5608	0.0194986	0.0626153	0.661	1680	tags=52%, list=21%, signal=66%
KEGG_TYPE_I_DIABETES_MELLITUS	KEGG_TYPE_I_DIABETES_MELLITUS	Details ...	15	-0.560391	-1.54324	0.0485175	0.0670136	0.713	161	tags=40%, list=2%, signal=41%
KEGG_AUTOIMMUNE_THYROID_DISEASE	KEGG_AUTOIMMUNE_THYROID_DISEASE	Details ...	15	-0.542031	-1.53294	0.0643432	0.0682308	0.742	161	tags=40%, list=2%, signal=41%
KEGG_CYTOSOLIC_DNA_SENSING_PATHWAY	KEGG_CYTOSOLIC_DNA_SENSING_PATHWAY	Details ...	27	-0.471347	-1.52684	0.027027	0.067631	0.758	886	tags=26%, list=11%, signal=29%
KEGG_LEISHMANIA_INFECTION	KEGG_LEISHMANIA_INFECTION		36	-0.438778	-1.5236	0.028125	0.0657825	0.762	1405	tags=39%, list=18%, signal=47%
KEGG_ALLOGRAFT_REJECTION	KEGG_ALLOGRAFT_REJECTION		15	-0.542031	-1.46001	0.0828729	0.0947249	0.887	161	tags=40%, list=2%, signal=41%
KEGG_BETA_ALANINE_METABOLISM	KEGG_BETA_ALANINE_METABOLISM		15	-0.513936	-1.44036	0.0888889	0.101434	0.919	325	tags=13%, list=4%, signal=14%
KEGG_SPLICEOSOME	KEGG_SPLICEOSOME		116	-0.324624	-1.4041	0.0361446	0.121556	0.95	2039	tags=35%, list=26%, signal=47%
KEGG_SYSTEMIC_LUPUS_ERYTHEMATOSUS	KEGG_SYSTEMIC_LUPUS_ERYTHEMATOSUS		28	-0.427852	-1.40377	0.0819672	0.116969	0.95	455	tags=32%, list=6%, signal=34%
KEGG_UBIQUITIN_MEDIATED_PROTEOLYSIS	KEGG_UBIQUITIN_MEDIATED_PROTEOLYSIS		95	-0.325938	-1.36962	0.029304	0.13604	0.978	2116	tags=39%, list=27%, signal=52%
KEGG_RNA_DEGRADATION	KEGG_RNA_DEGRADATION		53	-0.337826	-1.28967	0.0996785	0.20115	0.999	1862	tags=32%, list=23%, signal=42%
KEGG_TGF_BETA_SIGNALING_PATHWAY	KEGG_TGF_BETA_SIGNALING_PATHWAY		34	-0.372543	-1.26202	0.152905	0.225487	0.999	1064	tags=18%, list=13%, signal=20%
KEGG_CELL_CYCLE	KEGG_CELL_CYCLE		91	-0.298991	-1.23637	0.0978261	0.248792	0.999	2098	tags=30%, list=26%, signal=40%
KEGG_NOTCH_SIGNALING_PATHWAY	KEGG_NOTCH_SIGNALING_PATHWAY		28	-0.374934	-1.22309	0.182371	0.25521	1	1511	tags=36%, list=19%, signal=44%
KEGG_CYSTEINE_AND_METHIONINE_METABOLISM	KEGG_CYSTEINE_AND_METHIONINE_METABOLISM		18	-0.399419	-1.17426	0.245989	0.313277	1	858	tags=17%, list=11%, signal=19%
KEGG_CITRATE_CYCLE_TCA_CYCLE	KEGG_CITRATE_CYCLE_TCA_CYCLE		27	-0.344275	-1.13803	0.267568	0.358137	1	247	tags=11%, list=3%, signal=11%
KEGG_ALZHEIMERS_DISEASE	KEGG_ALZHEIMERS_DISEASE		99	-0.266866	-1.12481	0.213115	0.370314	1	1364	tags=22%, list=17%, signal=26%
KEGG_PRION_DISEASES	KEGG_PRION_DISEASES		15	-0.390966	-1.0786	0.330808	0.440517	1	1083	tags=33%, list=14%, signal=39%
KEGG_PENTOSE_PHOSPHATE_PATHWAY	KEGG_PENTOSE_PHOSPHATE_PATHWAY		21	-0.331682	-1.00767	0.435013	0.571175	1	457	tags=24%, list=6%, signal=25%
KEGG_PYRUVATE_METABOLISM	KEGG_PYRUVATE_METABOLISM		32	-0.291164	-0.962424	0.51632	0.65697	1	1103	tags=25%, list=14%, signal=29%
KEGG_NOD_LIKE_RECEPTOR_SIGNALING_PATHWAY	KEGG_NOD_LIKE_RECEPTOR_SIGNALING_PATHWAY		34	-0.273961	-0.93842	0.575144	0.694794	1	1519	tags=32%, list=19%, signal=40%
KEGG_PROSTATE_CANCER	KEGG_PROSTATE_CANCER		53	-0.242515	-0.916131	0.617363	0.724569	1	1111	tags=19%, list=14%, signal=22%
KEGG_HEDGEHOG_SIGNALING_PATHWAY	KEGG_HEDGEHOG_SIGNALING_PATHWAY		15	-0.325282	-0.90374	0.578947	0.733158	1	523	tags=27%, list=7%, signal=28%
KEGG_OOCYTE_MEIOSIS	KEGG_OOCYTE_MEIOSIS		73	-0.217123	-0.872269	0.723485	0.78161	1	518	tags=11%, list=7%, signal=12%
KEGG_MTOR_SIGNALING_PATHWAY	KEGG_MTOR_SIGNALING_PATHWAY		33	-0.254777	-0.860223	0.714706	0.787395	1	451	tags=9%, list=6%, signal=10%
KEGG_AMINOACYL_TRNA_BIOSYNTHESIS	KEGG_AMINOACYL_TRNA_BIOSYNTHESIS		40	-0.215553	-0.753951	0.8625	0.949488	1	1548	tags=25%, list=19%, signal=31%
KEGG_LYSINE_DEGRADATION	KEGG_LYSINE_DEGRADATION		37	-0.209491	-0.741459	0.901449	0.942291	1	1676	tags=32%, list=21%, signal=41%
KEGG_ACUTE_MYELOID_LEUKEMIA	KEGG_ACUTE_MYELOID_LEUKEMIA		38	-0.207913	-0.731342	0.897833	0.933028	1	22	tags=3%, list=0%, signal=3%
KEGG_SNARE_INTERACTIONS_IN_VESICULAR_TRANSPORT	KEGG_SNARE_INTERACTIONS_IN_VESICULAR_TRANSPORT		32	-0.213124	-0.727527	0.917431	0.916626	1	153	tags=6%, list=2%, signal=6%
KEGG_WNT_SIGNALING_PATHWAY	KEGG_WNT_SIGNALING_PATHWAY		76	-0.171957	-0.689494	0.982394	0.931179	1	2162	tags=34%, list=27%, signal=47%

## Sheet: REACTOME_up_in_KPCN
NAME	GS<br> follow link to MSigDB	GS DETAILS	SIZE	ES	NES	NOM p-val	FDR q-val	FWER p-val	RANK AT MAX	LEADING EDGE
REACTOME_EXTRACELLULAR_MATRIX_ORGANIZATION	REACTOME_EXTRACELLULAR_MATRIX_ORGANIZATION	Details ...	204	0.634732	2.92401	0	0	0	1573	tags=60%, list=18%, signal=72%
REACTOME_COLLAGEN_FORMATION	REACTOME_COLLAGEN_FORMATION	Details ...	61	0.730688	2.80484	0	0	0	1488	tags=77%, list=17%, signal=93%
REACTOME_ASSEMBLY_OF_COLLAGEN_FIBRILS_AND_OTHER_MULTIMERIC_STRUCTURES	REACTOME_ASSEMBLY_OF_COLLAGEN_FIBRILS_AND_OTHER_MULTIMERIC_STRUCTURES	Details ...	46	0.741266	2.69582	0	0	0	1488	tags=80%, list=17%, signal=97%
REACTOME_RESPONSE_TO_ELEVATED_PLATELET_CYTOSOLIC_CA2	REACTOME_RESPONSE_TO_ELEVATED_PLATELET_CYTOSOLIC_CA2	Details ...	114	0.61748	2.64164	0	0	0	954	tags=45%, list=11%, signal=50%
REACTOME_DEGRADATION_OF_THE_EXTRACELLULAR_MATRIX	REACTOME_DEGRADATION_OF_THE_EXTRACELLULAR_MATRIX	Details ...	87	0.633875	2.5585	0	0	0	1442	tags=62%, list=17%, signal=74%
REACTOME_COLLAGEN_DEGRADATION	REACTOME_COLLAGEN_DEGRADATION	Details ...	42	0.720742	2.55249	0	0	0	1423	tags=74%, list=17%, signal=88%
REACTOME_NON_INTEGRIN_MEMBRANE_ECM_INTERACTIONS	REACTOME_NON_INTEGRIN_MEMBRANE_ECM_INTERACTIONS	Details ...	47	0.667067	2.3924	0	0	0	1892	tags=70%, list=22%, signal=90%
REACTOME_COLLAGEN_BIOSYNTHESIS_AND_MODIFYING_ENZYMES	REACTOME_COLLAGEN_BIOSYNTHESIS_AND_MODIFYING_ENZYMES	Details ...	40	0.67992	2.38181	0	0	0	1488	tags=70%, list=17%, signal=84%
REACTOME_GLYCOSAMINOGLYCAN_METABOLISM	REACTOME_GLYCOSAMINOGLYCAN_METABOLISM	Details ...	72	0.598842	2.36598	0	0	0	1559	tags=57%, list=18%, signal=69%
REACTOME_INTEGRIN_CELL_SURFACE_INTERACTIONS	REACTOME_INTEGRIN_CELL_SURFACE_INTERACTIONS	Details ...	64	0.602221	2.28383	0	0.000145909	0.002	1892	tags=64%, list=22%, signal=82%
REACTOME_SYNDECAN_INTERACTIONS	REACTOME_SYNDECAN_INTERACTIONS	Details ...	26	0.712643	2.25424	0	0.000132645	0.002	1573	tags=73%, list=18%, signal=89%
REACTOME_ELASTIC_FIBRE_FORMATION	REACTOME_ELASTIC_FIBRE_FORMATION	Details ...	36	0.655055	2.25187	0	0.000121591	0.002	1665	tags=61%, list=19%, signal=76%
REACTOME_CHONDROITIN_SULFATE_DERMATAN_SULFATE_METABOLISM	REACTOME_CHONDROITIN_SULFATE_DERMATAN_SULFATE_METABOLISM	Details ...	32	0.683377	2.24579	0	0.000112238	0.002	2068	tags=78%, list=24%, signal=103%
REACTOME_ECM_PROTEOGLYCANS	REACTOME_ECM_PROTEOGLYCANS	Details ...	57	0.603958	2.24288	0	0.000104221	0.002	1411	tags=58%, list=16%, signal=69%
REACTOME_NEUTROPHIL_DEGRANULATION	REACTOME_NEUTROPHIL_DEGRANULATION	Details ...	388	0.451486	2.23031	0	9.7273e-05	0.002	1565	tags=37%, list=18%, signal=43%
REACTOME_PLATELET_ACTIVATION_SIGNALING_AND_AGGREGATION	REACTOME_PLATELET_ACTIVATION_SIGNALING_AND_AGGREGATION	Details ...	205	0.479594	2.22029	0	9.11934e-05	0.002	1636	tags=36%, list=19%, signal=44%
REACTOME_LAMININ_INTERACTIONS	REACTOME_LAMININ_INTERACTIONS	Details ...	26	0.68552	2.18462	0	0.000129417	0.003	1797	tags=69%, list=21%, signal=87%
REACTOME_ACTIVATION_OF_MATRIX_METALLOPROTEINASES	REACTOME_ACTIVATION_OF_MATRIX_METALLOPROTEINASES	Details ...	23	0.70294	2.18291	0	0.000122227	0.003	1442	tags=78%, list=17%, signal=94%
REACTOME_COMPLEMENT_CASCADE	REACTOME_COMPLEMENT_CASCADE	Details ...	39	0.60977	2.1211	0	0.000586092	0.015	1382	tags=56%, list=16%, signal=67%
REACTOME_DISEASES_ASSOCIATED_WITH_GLYCOSAMINOGLYCAN_METABOLISM	REACTOME_DISEASES_ASSOCIATED_WITH_GLYCOSAMINOGLYCAN_METABOLISM	Details ...	29	0.642069	2.09734	0	0.00100818	0.027	2068	tags=72%, list=24%, signal=95%
REACTOME_HEPARAN_SULFATE_HEPARIN_HS_GAG_METABOLISM	REACTOME_HEPARAN_SULFATE_HEPARIN_HS_GAG_METABOLISM		28	0.659296	2.07822	0	0.00106785	0.03	1686	tags=64%, list=20%, signal=80%
REACTOME_REGULATION_OF_INSULIN_LIKE_GROWTH_FACTOR_IGF_TRANSPORT_AND_UPTAKE_BY_INSULIN_LIKE_GROWTH_FACTOR_BINDING_PROTEINS_IGFBPS	REACTOME_REGULATION_OF_INSULIN_LIKE_GROWTH_FACTOR_IGF_TRANSPORT_AND_UPTAKE_BY_INSULIN_LIKE_GROWTH_FACTOR_BINDING_PROTEINS_IGFBPS		82	0.512369	2.06535	0	0.00112305	0.033	1121	tags=39%, list=13%, signal=44%
REACTOME_MET_ACTIVATES_PTK2_SIGNALING	REACTOME_MET_ACTIVATES_PTK2_SIGNALING		25	0.64692	2.06422	0	0.00113977	0.035	1767	tags=64%, list=21%, signal=80%
REACTOME_DISEASES_OF_GLYCOSYLATION	REACTOME_DISEASES_OF_GLYCOSYLATION		91	0.486882	2.01481	0	0.00186644	0.06	1198	tags=43%, list=14%, signal=49%
REACTOME_COMMON_PATHWAY_OF_FIBRIN_CLOT_FORMATION	REACTOME_COMMON_PATHWAY_OF_FIBRIN_CLOT_FORMATION		19	0.68531	2.01465	0	0.00179178	0.06	1382	tags=63%, list=16%, signal=75%
REACTOME_PLASMA_LIPOPROTEIN_ASSEMBLY_REMODELING_AND_CLEARANCE	REACTOME_PLASMA_LIPOPROTEIN_ASSEMBLY_REMODELING_AND_CLEARANCE		51	0.53988	1.99504	0	0.00227177	0.079	1724	tags=41%, list=20%, signal=51%
REACTOME_PLATELET_AGGREGATION_PLUG_FORMATION	REACTOME_PLATELET_AGGREGATION_PLUG_FORMATION		30	0.611611	1.99203	0	0.00224289	0.08	2064	tags=57%, list=24%, signal=74%
REACTOME_BINDING_AND_UPTAKE_OF_LIGANDS_BY_SCAVENGER_RECEPTORS	REACTOME_BINDING_AND_UPTAKE_OF_LIGANDS_BY_SCAVENGER_RECEPTORS		38	0.569775	1.99137	0	0.00218901	0.081	1580	tags=55%, list=18%, signal=67%
REACTOME_AMINO_ACIDS_REGULATE_MTORC1	REACTOME_AMINO_ACIDS_REGULATE_MTORC1		34	0.604221	1.98868	0	0.00224201	0.086	2092	tags=65%, list=24%, signal=85%
REACTOME_ROS_AND_RNS_PRODUCTION_IN_PHAGOCYTES	REACTOME_ROS_AND_RNS_PRODUCTION_IN_PHAGOCYTES		25	0.63293	1.98252	0	0.00244266	0.097	2139	tags=76%, list=25%, signal=101%
REACTOME_INSULIN_RECEPTOR_RECYCLING	REACTOME_INSULIN_RECEPTOR_RECYCLING		17	0.675334	1.97605	0	0.00262268	0.107	1756	tags=82%, list=20%, signal=103%
REACTOME_MOLECULES_ASSOCIATED_WITH_ELASTIC_FIBRES	REACTOME_MOLECULES_ASSOCIATED_WITH_ELASTIC_FIBRES		29	0.610222	1.97581	0	0.00254072	0.107	1665	tags=55%, list=19%, signal=68%
REACTOME_FORMATION_OF_FIBRIN_CLOT_CLOTTING_CASCADE	REACTOME_FORMATION_OF_FIBRIN_CLOT_CLOTTING_CASCADE		33	0.592809	1.96791	0	0.00275815	0.119	2146	tags=70%, list=25%, signal=93%
REACTOME_COLLAGEN_CHAIN_TRIMERIZATION	REACTOME_COLLAGEN_CHAIN_TRIMERIZATION		24	0.628606	1.93526	0.00374532	0.00427906	0.178	1488	tags=67%, list=17%, signal=80%
REACTOME_CLASS_A_1_RHODOPSIN_LIKE_RECEPTORS	REACTOME_CLASS_A_1_RHODOPSIN_LIKE_RECEPTORS		32	0.582418	1.92631	0.00191205	0.0046643	0.201	1798	tags=66%, list=21%, signal=83%
REACTOME_INTERLEUKIN_4_AND_INTERLEUKIN_13_SIGNALING	REACTOME_INTERLEUKIN_4_AND_INTERLEUKIN_13_SIGNALING		54	0.511548	1.91129	0.00181488	0.00588007	0.248	2064	tags=57%, list=24%, signal=75%
REACTOME_SCAVENGING_BY_CLASS_A_RECEPTORS	REACTOME_SCAVENGING_BY_CLASS_A_RECEPTORS		17	0.670414	1.90487	0	0.00596423	0.259	1797	tags=71%, list=21%, signal=89%
REACTOME_PEPTIDE_LIGAND_BINDING_RECEPTORS	REACTOME_PEPTIDE_LIGAND_BINDING_RECEPTORS		28	0.584817	1.89695	0.00367647	0.00635582	0.277	1382	tags=61%, list=16%, signal=72%
REACTOME_SIGNALING_BY_INSULIN_RECEPTOR	REACTOME_SIGNALING_BY_INSULIN_RECEPTOR		46	0.516212	1.89682	0	0.00621216	0.278	2092	tags=54%, list=24%, signal=72%
REACTOME_IRON_UPTAKE_AND_TRANSPORT	REACTOME_IRON_UPTAKE_AND_TRANSPORT		39	0.541734	1.87818	0	0.0080307	0.345	1781	tags=56%, list=21%, signal=71%
REACTOME_HS_GAG_DEGRADATION	REACTOME_HS_GAG_DEGRADATION		16	0.677652	1.87589	0	0.00801509	0.354	1686	tags=69%, list=20%, signal=85%
REACTOME_O_GLYCOSYLATION_OF_TSR_DOMAIN_CONTAINING_PROTEINS	REACTOME_O_GLYCOSYLATION_OF_TSR_DOMAIN_CONTAINING_PROTEINS		17	0.64749	1.87463	0.00189036	0.0079141	0.356	1754	tags=65%, list=20%, signal=81%
REACTOME_REGULATION_OF_GLUCOKINASE_BY_GLUCOKINASE_REGULATORY_PROTEIN	REACTOME_REGULATION_OF_GLUCOKINASE_BY_GLUCOKINASE_REGULATORY_PROTEIN		30	0.57213	1.86489	0	0.00835275	0.377	2223	tags=57%, list=26%, signal=76%
REACTOME_GLYCOSPHINGOLIPID_METABOLISM	REACTOME_GLYCOSPHINGOLIPID_METABOLISM		27	0.576561	1.8575	0.00747664	0.00889357	0.398	2617	tags=70%, list=31%, signal=101%
REACTOME_REGULATION_OF_TLR_BY_ENDOGENOUS_LIGAND	REACTOME_REGULATION_OF_TLR_BY_ENDOGENOUS_LIGAND		16	0.66124	1.85498	0.0020202	0.00889291	0.405	1580	tags=63%, list=18%, signal=76%
REACTOME_METABOLISM_OF_CARBOHYDRATES	REACTOME_METABOLISM_OF_CARBOHYDRATES		207	0.400323	1.84906	0	0.00934927	0.428	2186	tags=48%, list=26%, signal=63%
REACTOME_HEMOSTASIS	REACTOME_HEMOSTASIS		430	0.370798	1.84401	0	0.00958206	0.439	1749	tags=31%, list=20%, signal=37%
REACTOME_MET_PROMOTES_CELL_MOTILITY	REACTOME_MET_PROMOTES_CELL_MOTILITY		36	0.535451	1.83883	0.00363636	0.00995729	0.457	1012	tags=36%, list=12%, signal=41%
REACTOME_A_TETRASACCHARIDE_LINKER_SEQUENCE_IS_REQUIRED_FOR_GAG_SYNTHESIS	REACTOME_A_TETRASACCHARIDE_LINKER_SEQUENCE_IS_REQUIRED_FOR_GAG_SYNTHESIS		16	0.659367	1.838	0.00194175	0.00981543	0.461	1559	tags=63%, list=18%, signal=76%
REACTOME_KERATAN_SULFATE_KERATIN_METABOLISM	REACTOME_KERATAN_SULFATE_KERATIN_METABOLISM		21	0.608082	1.83295	0.002	0.0102276	0.481	1320	tags=57%, list=15%, signal=67%
REACTOME_PLASMA_LIPOPROTEIN_REMODELING	REACTOME_PLASMA_LIPOPROTEIN_REMODELING		19	0.605325	1.82133	0.00793651	0.0113298	0.532	1724	tags=58%, list=20%, signal=72%
REACTOME_INITIAL_TRIGGERING_OF_COMPLEMENT	REACTOME_INITIAL_TRIGGERING_OF_COMPLEMENT		15	0.655431	1.7988	0.00596422	0.0140869	0.617	2027	tags=80%, list=24%, signal=105%
REACTOME_SUMOYLATION_OF_UBIQUITINYLATION_PROTEINS	REACTOME_SUMOYLATION_OF_UBIQUITINYLATION_PROTEINS		35	0.525152	1.79724	0.00353982	0.0140866	0.629	2223	tags=51%, list=26%, signal=69%
REACTOME_TRANSFERRIN_ENDOCYTOSIS_AND_RECYCLING	REACTOME_TRANSFERRIN_ENDOCYTOSIS_AND_RECYCLING		20	0.601812	1.79486	0.00740741	0.014171	0.635	1781	tags=75%, list=21%, signal=94%
REACTOME_CELL_SURFACE_INTERACTIONS_AT_THE_VASCULAR_WALL	REACTOME_CELL_SURFACE_INTERACTIONS_AT_THE_VASCULAR_WALL		97	0.435129	1.79329	0	0.01409	0.639	1730	tags=39%, list=20%, signal=49%
REACTOME_INTEGRIN_SIGNALING	REACTOME_INTEGRIN_SIGNALING		25	0.564304	1.78417	0.00381679	0.0152251	0.678	2264	tags=52%, list=26%, signal=70%
REACTOME_GRB2_SOS_PROVIDES_LINKAGE_TO_MAPK_SIGNALING_FOR_INTEGRINS	REACTOME_GRB2_SOS_PROVIDES_LINKAGE_TO_MAPK_SIGNALING_FOR_INTEGRINS		15	0.626723	1.77575	0.00558659	0.0164658	0.714	2264	tags=67%, list=26%, signal=90%
REACTOME_GLYCOLYSIS	REACTOME_GLYCOLYSIS		66	0.450638	1.76231	0	0.0185862	0.768	2096	tags=50%, list=24%, signal=66%
REACTOME_CELL_JUNCTION_ORGANIZATION	REACTOME_CELL_JUNCTION_ORGANIZATION		57	0.461979	1.75754	0.00190476	0.0192448	0.786	2245	tags=49%, list=26%, signal=66%
REACTOME_PLASMA_LIPOPROTEIN_CLEARANCE	REACTOME_PLASMA_LIPOPROTEIN_CLEARANCE		27	0.538331	1.7348	0.00750469	0.0235962	0.848	1630	tags=33%, list=19%, signal=41%
REACTOME_P130CAS_LINKAGE_TO_MAPK_SIGNALING_FOR_INTEGRINS	REACTOME_P130CAS_LINKAGE_TO_MAPK_SIGNALING_FOR_INTEGRINS		15	0.632783	1.72866	0.00792079	0.0247975	0.867	2264	tags=67%, list=26%, signal=90%
REACTOME_NUCLEAR_PORE_COMPLEX_NPC_DISASSEMBLY	REACTOME_NUCLEAR_PORE_COMPLEX_NPC_DISASSEMBLY		33	0.512201	1.70463	0.00188324	0.0311201	0.925	2375	tags=55%, list=28%, signal=75%
REACTOME_POSTMITOTIC_NUCLEAR_PORE_COMPLEX_NPC_REFORMATION	REACTOME_POSTMITOTIC_NUCLEAR_PORE_COMPLEX_NPC_REFORMATION		27	0.520498	1.67641	0.014733	0.0392354	0.961	2766	tags=67%, list=32%, signal=98%
REACTOME_TRANSPORT_OF_THE_SLBP_DEPENDANT_MATURE_MRNA	REACTOME_TRANSPORT_OF_THE_SLBP_DEPENDANT_MATURE_MRNA		34	0.49605	1.67168	0.00875657	0.0401206	0.97	2223	tags=47%, list=26%, signal=63%
REACTOME_DISEASES_OF_METABOLISM	REACTOME_DISEASES_OF_METABOLISM		151	0.375327	1.66775	0	0.0407763	0.974	1198	tags=32%, list=14%, signal=36%
REACTOME_NCAM1_INTERACTIONS	REACTOME_NCAM1_INTERACTIONS		19	0.568528	1.652	0.0181488	0.0464216	0.986	1797	tags=63%, list=21%, signal=80%
REACTOME_IMMUNOREGULATORY_INTERACTIONS_BETWEEN_A_LYMPHOID_AND_A_NON_LYMPHOID_CELL	REACTOME_IMMUNOREGULATORY_INTERACTIONS_BETWEEN_A_LYMPHOID_AND_A_NON_LYMPHOID_CELL		43	0.455785	1.6506	0.00733945	0.0462896	0.986	1610	tags=37%, list=19%, signal=46%
REACTOME_KERATAN_SULFATE_BIOSYNTHESIS	REACTOME_KERATAN_SULFATE_BIOSYNTHESIS		15	0.587917	1.64613	0.0180361	0.0474739	0.987	1320	tags=53%, list=15%, signal=63%
REACTOME_SUMOYLATION_OF_SUMOYLATION_PROTEINS	REACTOME_SUMOYLATION_OF_SUMOYLATION_PROTEINS		34	0.484387	1.64509	0.0133843	0.0470779	0.987	2223	tags=50%, list=26%, signal=67%
REACTOME_CELL_CELL_COMMUNICATION	REACTOME_CELL_CELL_COMMUNICATION		86	0.407644	1.62861	0.00168634	0.0530413	0.991	2264	tags=44%, list=26%, signal=59%
REACTOME_SPHINGOLIPID_METABOLISM	REACTOME_SPHINGOLIPID_METABOLISM		53	0.438827	1.6281	0.00904159	0.0524317	0.991	1821	tags=40%, list=21%, signal=50%
REACTOME_CELL_EXTRACELLULAR_MATRIX_INTERACTIONS	REACTOME_CELL_EXTRACELLULAR_MATRIX_INTERACTIONS		16	0.568748	1.61693	0.0265152	0.0569516	0.995	2566	tags=56%, list=30%, signal=80%
REACTOME_GLUCOSE_METABOLISM	REACTOME_GLUCOSE_METABOLISM		84	0.39443	1.60673	0.00347222	0.0612437	0.997	2136	tags=45%, list=25%, signal=60%
REACTOME_HCMV_LATE_EVENTS	REACTOME_HCMV_LATE_EVENTS		54	0.428398	1.59818	0.00865052	0.0648062	0.998	2232	tags=48%, list=26%, signal=65%
REACTOME_MITOCHONDRIAL_CALCIUM_ION_TRANSPORT	REACTOME_MITOCHONDRIAL_CALCIUM_ION_TRANSPORT		19	0.537492	1.5772	0.0310219	0.0755686	0.999	1395	tags=32%, list=16%, signal=38%
REACTOME_DISEASES_ASSOCIATED_WITH_O_GLYCOSYLATION_OF_PROTEINS	REACTOME_DISEASES_ASSOCIATED_WITH_O_GLYCOSYLATION_OF_PROTEINS		34	0.462135	1.57289	0.0232143	0.0770577	0.999	1114	tags=38%, list=13%, signal=44%
REACTOME_LATE_ENDOSOMAL_MICROAUTOPHAGY	REACTOME_LATE_ENDOSOMAL_MICROAUTOPHAGY		26	0.489589	1.56218	0.021544	0.0829224	0.999	1240	tags=38%, list=14%, signal=45%
REACTOME_DISEASES_OF_IMMUNE_SYSTEM	REACTOME_DISEASES_OF_IMMUNE_SYSTEM		25	0.493513	1.55869	0.027933	0.0841584	0.999	2015	tags=40%, list=24%, signal=52%
REACTOME_GPCR_LIGAND_BINDING	REACTOME_GPCR_LIGAND_BINDING		53	0.419997	1.55525	0.0125673	0.0853877	0.999	1382	tags=38%, list=16%, signal=45%
REACTOME_INTRAFLAGELLAR_TRANSPORT	REACTOME_INTRAFLAGELLAR_TRANSPORT		39	0.445999	1.54167	0.018315	0.0934963	0.999	1965	tags=51%, list=23%, signal=66%
REACTOME_ENDOSOMAL_SORTING_COMPLEX_REQUIRED_FOR_TRANSPORT_ESCRT	REACTOME_ENDOSOMAL_SORTING_COMPLEX_REQUIRED_FOR_TRANSPORT_ESCRT		25	0.490195	1.53531	0.0390625	0.0974922	0.999	2232	tags=48%, list=26%, signal=65%
REACTOME_POST_TRANSLATIONAL_MODIFICATION_SYNTHESIS_OF_GPI_ANCHORED_PROTEINS	REACTOME_POST_TRANSLATIONAL_MODIFICATION_SYNTHESIS_OF_GPI_ANCHORED_PROTEINS		35	0.455932	1.52853	0.0254083	0.101904	1	1824	tags=54%, list=21%, signal=69%
REACTOME_INTERACTIONS_OF_VPR_WITH_HOST_CELLULAR_PROTEINS	REACTOME_INTERACTIONS_OF_VPR_WITH_HOST_CELLULAR_PROTEINS		35	0.447584	1.52571	0.0318725	0.102411	1	2223	tags=49%, list=26%, signal=65%
REACTOME_SIGNALING_BY_PDGF	REACTOME_SIGNALING_BY_PDGF		49	0.419604	1.51512	0.0167286	0.109275	1	691	tags=22%, list=8%, signal=24%
REACTOME_PARASITE_INFECTION	REACTOME_PARASITE_INFECTION		54	0.400199	1.5018	0.0204429	0.118673	1	2717	tags=46%, list=32%, signal=67%
REACTOME_NUCLEAR_IMPORT_OF_REV_PROTEIN	REACTOME_NUCLEAR_IMPORT_OF_REV_PROTEIN		33	0.445359	1.5003	0.0415162	0.11855	1	2766	tags=58%, list=32%, signal=85%
REACTOME_INTRINSIC_PATHWAY_OF_FIBRIN_CLOT_FORMATION	REACTOME_INTRINSIC_PATHWAY_OF_FIBRIN_CLOT_FORMATION		19	0.508436	1.48875	0.0499002	0.127371	1	2144	tags=63%, list=25%, signal=84%
REACTOME_INTERACTIONS_OF_REV_WITH_HOST_CELLULAR_PROTEINS	REACTOME_INTERACTIONS_OF_REV_WITH_HOST_CELLULAR_PROTEINS		36	0.433841	1.47602	0.0388007	0.137447	1	2223	tags=47%, list=26%, signal=64%
REACTOME_MATURATION_OF_SARS_COV_2_SPIKE_PROTEIN	REACTOME_MATURATION_OF_SARS_COV_2_SPIKE_PROTEIN		23	0.474231	1.47592	0.0682261	0.135988	1	1435	tags=39%, list=17%, signal=47%
REACTOME_ROLE_OF_LAT2_NTAL_LAB_ON_CALCIUM_MOBILIZATION	REACTOME_ROLE_OF_LAT2_NTAL_LAB_ON_CALCIUM_MOBILIZATION		15	0.526682	1.47023	0.063197	0.139723	1	1896	tags=33%, list=22%, signal=43%
REACTOME_FGFR1_MUTANT_RECEPTOR_ACTIVATION	REACTOME_FGFR1_MUTANT_RECEPTOR_ACTIVATION		22	0.476181	1.45174	0.0620301	0.157539	1	1483	tags=32%, list=17%, signal=38%
REACTOME_TRANSPORT_OF_MATURE_MRNAS_DERIVED_FROM_INTRONLESS_TRANSCRIPTS	REACTOME_TRANSPORT_OF_MATURE_MRNAS_DERIVED_FROM_INTRONLESS_TRANSCRIPTS		41	0.402575	1.44131	0.0429105	0.167843	1	2223	tags=39%, list=26%, signal=52%
REACTOME_TOLL_LIKE_RECEPTOR_CASCADES	REACTOME_TOLL_LIKE_RECEPTOR_CASCADES		115	0.333595	1.43676	0.0164745	0.171115	1	1465	tags=26%, list=17%, signal=31%
REACTOME_AUTOPHAGY	REACTOME_AUTOPHAGY		117	0.331364	1.42398	0.0251678	0.183967	1	2282	tags=41%, list=27%, signal=55%
REACTOME_IRE1ALPHA_ACTIVATES_CHAPERONES	REACTOME_IRE1ALPHA_ACTIVATES_CHAPERONES		40	0.405028	1.41933	0.0676157	0.187347	1	2261	tags=50%, list=26%, signal=68%
REACTOME_O_LINKED_GLYCOSYLATION	REACTOME_O_LINKED_GLYCOSYLATION		50	0.393134	1.41412	0.0459364	0.191586	1	1320	tags=34%, list=15%, signal=40%
REACTOME_RAC3_GTPASE_CYCLE	REACTOME_RAC3_GTPASE_CYCLE		76	0.351498	1.41313	0.0361446	0.190825	1	1476	tags=26%, list=17%, signal=32%
REACTOME_LDL_CLEARANCE	REACTOME_LDL_CLEARANCE		19	0.470852	1.4104	0.0912477	0.192108	1	1580	tags=26%, list=18%, signal=32%
REACTOME_DEREGULATED_CDK5_TRIGGERS_MULTIPLE_NEURODEGENERATIVE_PATHWAYS_IN_ALZHEIMER_S_DISEASE_MODELS	REACTOME_DEREGULATED_CDK5_TRIGGERS_MULTIPLE_NEURODEGENERATIVE_PATHWAYS_IN_ALZHEIMER_S_DISEASE_MODELS		16	0.501689	1.40273	0.0905588	0.199708	1	2338	tags=63%, list=27%, signal=86%
REACTOME_RHO_GTPASES_ACTIVATE_WASPS_AND_WAVES	REACTOME_RHO_GTPASES_ACTIVATE_WASPS_AND_WAVES		31	0.42698	1.39909	0.0650995	0.202044	1	2535	tags=42%, list=30%, signal=59%
REACTOME_NICOTINATE_METABOLISM	REACTOME_NICOTINATE_METABOLISM		21	0.468092	1.39669	0.0946197	0.203106	1	1108	tags=33%, list=13%, signal=38%
REACTOME_BUDDING_AND_MATURATION_OF_HIV_VIRION	REACTOME_BUDDING_AND_MATURATION_OF_HIV_VIRION		22	0.460182	1.39657	0.0914077	0.201239	1	2232	tags=45%, list=26%, signal=61%
REACTOME_INTERLEUKIN_RECEPTOR_SHC_SIGNALING	REACTOME_INTERLEUKIN_RECEPTOR_SHC_SIGNALING		16	0.50162	1.38031	0.113422	0.220096	1	190	tags=13%, list=2%, signal=13%
REACTOME_SIGNALING_BY_RECEPTOR_TYROSINE_KINASES	REACTOME_SIGNALING_BY_RECEPTOR_TYROSINE_KINASES		341	0.280203	1.36839	0.00600601	0.234864	1	1849	tags=28%, list=22%, signal=34%
REACTOME_CLASS_I_PEROXISOMAL_MEMBRANE_PROTEIN_IMPORT	REACTOME_CLASS_I_PEROXISOMAL_MEMBRANE_PROTEIN_IMPORT		17	0.467883	1.35857	0.119772	0.246851	1	864	tags=24%, list=10%, signal=26%
REACTOME_GAMMA_CARBOXYLATION_HYPUSINE_FORMATION_AND_ARYLSULFATASE_ACTIVATION	REACTOME_GAMMA_CARBOXYLATION_HYPUSINE_FORMATION_AND_ARYLSULFATASE_ACTIVATION		30	0.407185	1.35146	0.104056	0.255207	1	2167	tags=50%, list=25%, signal=67%
REACTOME_RAC2_GTPASE_CYCLE	REACTOME_RAC2_GTPASE_CYCLE		78	0.33342	1.34918	0.0541045	0.25637	1	2235	tags=36%, list=26%, signal=48%
REACTOME_RHOA_GTPASE_CYCLE	REACTOME_RHOA_GTPASE_CYCLE		123	0.313083	1.34135	0.0336283	0.265824	1	1925	tags=30%, list=22%, signal=38%
REACTOME_SIGNALING_BY_TYPE_1_INSULIN_LIKE_GROWTH_FACTOR_1_RECEPTOR_IGF1R	REACTOME_SIGNALING_BY_TYPE_1_INSULIN_LIKE_GROWTH_FACTOR_1_RECEPTOR_IGF1R		29	0.412128	1.33947	0.0966543	0.266527	1	2061	tags=41%, list=24%, signal=54%
REACTOME_SIGNALING_BY_FGFR1_IN_DISEASE	REACTOME_SIGNALING_BY_FGFR1_IN_DISEASE		29	0.411348	1.32871	0.104762	0.28149	1	1051	tags=24%, list=12%, signal=27%
REACTOME_SARS_COV_2_INFECTION	REACTOME_SARS_COV_2_INFECTION		51	0.363811	1.32649	0.0955752	0.282383	1	1435	tags=27%, list=17%, signal=33%
REACTOME_METABOLISM_OF_FAT_SOLUBLE_VITAMINS	REACTOME_METABOLISM_OF_FAT_SOLUBLE_VITAMINS		31	0.400627	1.32573	0.112727	0.281027	1	1724	tags=42%, list=20%, signal=52%
REACTOME_EXPORT_OF_VIRAL_RIBONUCLEOPROTEINS_FROM_NUCLEUS	REACTOME_EXPORT_OF_VIRAL_RIBONUCLEOPROTEINS_FROM_NUCLEUS		32	0.397	1.32434	0.107468	0.280782	1	2223	tags=50%, list=26%, signal=67%
REACTOME_RET_SIGNALING	REACTOME_RET_SIGNALING		27	0.412684	1.32387	0.110487	0.278991	1	1637	tags=30%, list=19%, signal=37%
REACTOME_ANTIGEN_PROCESSING_CROSS_PRESENTATION	REACTOME_ANTIGEN_PROCESSING_CROSS_PRESENTATION		89	0.327476	1.32193	0.0595447	0.279388	1	1474	tags=22%, list=17%, signal=27%
REACTOME_GLUCONEOGENESIS	REACTOME_GLUCONEOGENESIS		29	0.402554	1.31866	0.111317	0.2826	1	1344	tags=34%, list=16%, signal=41%
REACTOME_SUMOYLATION_OF_DNA_REPLICATION_PROTEINS	REACTOME_SUMOYLATION_OF_DNA_REPLICATION_PROTEINS		40	0.366546	1.31466	0.0998218	0.286623	1	2766	tags=55%, list=32%, signal=81%
REACTOME_RHOC_GTPASE_CYCLE	REACTOME_RHOC_GTPASE_CYCLE		67	0.335478	1.31303	0.0654545	0.286726	1	1376	tags=24%, list=16%, signal=28%
REACTOME_IRS_MEDIATED_SIGNALLING	REACTOME_IRS_MEDIATED_SIGNALLING		25	0.410222	1.30712	0.117647	0.294003	1	2061	tags=40%, list=24%, signal=53%
REACTOME_INTERFERON_ALPHA_BETA_SIGNALING	REACTOME_INTERFERON_ALPHA_BETA_SIGNALING		38	0.373253	1.29386	0.115456	0.314468	1	1763	tags=39%, list=21%, signal=49%
REACTOME_NR1H3_NR1H2_REGULATE_GENE_EXPRESSION_LINKED_TO_CHOLESTEROL_TRANSPORT_AND_EFFLUX	REACTOME_NR1H3_NR1H2_REGULATE_GENE_EXPRESSION_LINKED_TO_CHOLESTEROL_TRANSPORT_AND_EFFLUX		30	0.394572	1.29268	0.150268	0.313763	1	2162	tags=43%, list=25%, signal=58%
REACTOME_TRANSPORT_OF_SMALL_MOLECULES	REACTOME_TRANSPORT_OF_SMALL_MOLECULES		396	0.259628	1.28411	0.0143678	0.326402	1	1875	tags=26%, list=22%, signal=32%
REACTOME_MITOPHAGY	REACTOME_MITOPHAGY		21	0.422456	1.27949	0.156827	0.332401	1	3035	tags=52%, list=35%, signal=81%
REACTOME_RAC1_GTPASE_CYCLE	REACTOME_RAC1_GTPASE_CYCLE		145	0.287077	1.27604	0.0492064	0.336249	1	1927	tags=28%, list=22%, signal=35%
REACTOME_PINK1_PRKN_MEDIATED_MITOPHAGY	REACTOME_PINK1_PRKN_MEDIATED_MITOPHAGY		15	0.453351	1.27236	0.179245	0.340365	1	3035	tags=53%, list=35%, signal=82%
REACTOME_ADHERENS_JUNCTIONS_INTERACTIONS	REACTOME_ADHERENS_JUNCTIONS_INTERACTIONS		20	0.426882	1.26863	0.17658	0.344651	1	1615	tags=35%, list=19%, signal=43%
REACTOME_VIRAL_MESSENGER_RNA_SYNTHESIS	REACTOME_VIRAL_MESSENGER_RNA_SYNTHESIS		42	0.357735	1.26848	0.135135	0.342213	1	2373	tags=43%, list=28%, signal=59%
REACTOME_OVARIAN_TUMOR_DOMAIN_PROTEASES	REACTOME_OVARIAN_TUMOR_DOMAIN_PROTEASES		28	0.394	1.26789	0.149425	0.340618	1	1355	tags=21%, list=16%, signal=25%
REACTOME_SIGNAL_TRANSDUCTION_BY_L1	REACTOME_SIGNAL_TRANSDUCTION_BY_L1		21	0.409564	1.24174	0.202186	0.389736	1	1416	tags=38%, list=17%, signal=46%
REACTOME_GLYCOGEN_METABOLISM	REACTOME_GLYCOGEN_METABOLISM		17	0.431475	1.23873	0.188492	0.392943	1	1397	tags=41%, list=16%, signal=49%
REACTOME_ANTIVIRAL_MECHANISM_BY_IFN_STIMULATED_GENES	REACTOME_ANTIVIRAL_MECHANISM_BY_IFN_STIMULATED_GENES		68	0.31226	1.23382	0.145025	0.399892	1	2096	tags=35%, list=24%, signal=46%
REACTOME_INSERTION_OF_TAIL_ANCHORED_PROTEINS_INTO_THE_ENDOPLASMIC_RETICULUM_MEMBRANE	REACTOME_INSERTION_OF_TAIL_ANCHORED_PROTEINS_INTO_THE_ENDOPLASMIC_RETICULUM_MEMBRANE		17	0.432345	1.22941	0.201536	0.405805	1	1721	tags=35%, list=20%, signal=44%
REACTOME_SIGNALING_BY_MET	REACTOME_SIGNALING_BY_MET		67	0.310014	1.22727	0.147687	0.407423	1	1067	tags=22%, list=12%, signal=25%
REACTOME_AMYLOID_FIBER_FORMATION	REACTOME_AMYLOID_FIBER_FORMATION		38	0.35753	1.22267	0.177449	0.414035	1	1085	tags=29%, list=13%, signal=33%
REACTOME_CELL_CELL_JUNCTION_ORGANIZATION	REACTOME_CELL_CELL_JUNCTION_ORGANIZATION		32	0.372717	1.22107	0.18854	0.414533	1	1615	tags=31%, list=19%, signal=38%
REACTOME_NEGATIVE_REGULATION_OF_THE_PI3K_AKT_NETWORK	REACTOME_NEGATIVE_REGULATION_OF_THE_PI3K_AKT_NETWORK		59	0.323141	1.22029	0.147748	0.41312	1	1637	tags=29%, list=19%, signal=35%
REACTOME_FLT3_SIGNALING	REACTOME_FLT3_SIGNALING		30	0.37482	1.21731	0.213884	0.416527	1	2064	tags=37%, list=24%, signal=48%
REACTOME_TRNA_PROCESSING_IN_THE_NUCLEUS	REACTOME_TRNA_PROCESSING_IN_THE_NUCLEUS		51	0.324229	1.21406	0.166667	0.420341	1	2823	tags=45%, list=33%, signal=67%
REACTOME_CONSTITUTIVE_SIGNALING_BY_ABERRANT_PI3K_IN_CANCER	REACTOME_CONSTITUTIVE_SIGNALING_BY_ABERRANT_PI3K_IN_CANCER		30	0.37584	1.21044	0.205674	0.42493	1	2356	tags=43%, list=28%, signal=60%
REACTOME_INSULIN_RECEPTOR_SIGNALLING_CASCADE	REACTOME_INSULIN_RECEPTOR_SIGNALLING_CASCADE		30	0.375753	1.21005	0.190826	0.422673	1	2061	tags=37%, list=24%, signal=48%
REACTOME_NS1_MEDIATED_EFFECTS_ON_HOST_PATHWAYS	REACTOME_NS1_MEDIATED_EFFECTS_ON_HOST_PATHWAYS		38	0.353712	1.20954	0.188748	0.420796	1	2223	tags=45%, list=26%, signal=60%
REACTOME_PI3K_AKT_SIGNALING_IN_CANCER	REACTOME_PI3K_AKT_SIGNALING_IN_CANCER		51	0.32111	1.20526	0.168739	0.426891	1	2064	tags=33%, list=24%, signal=44%
REACTOME_RHOV_GTPASE_CYCLE	REACTOME_RHOV_GTPASE_CYCLE		30	0.366382	1.20479	0.184162	0.425011	1	209	tags=10%, list=2%, signal=10%
REACTOME_SARS_COV_1_INFECTION	REACTOME_SARS_COV_1_INFECTION		36	0.350119	1.20466	0.208621	0.42235	1	1320	tags=22%, list=15%, signal=26%
REACTOME_REGULATION_OF_RUNX1_EXPRESSION_AND_ACTIVITY	REACTOME_REGULATION_OF_RUNX1_EXPRESSION_AND_ACTIVITY		15	0.441325	1.19947	0.221601	0.430478	1	2575	tags=67%, list=30%, signal=95%
REACTOME_ACTIVATED_NOTCH1_TRANSMITS_SIGNAL_TO_THE_NUCLEUS	REACTOME_ACTIVATED_NOTCH1_TRANSMITS_SIGNAL_TO_THE_NUCLEUS		16	0.429184	1.19868	0.229412	0.429159	1	3079	tags=69%, list=36%, signal=107%
REACTOME_GPVI_MEDIATED_ACTIVATION_CASCADE	REACTOME_GPVI_MEDIATED_ACTIVATION_CASCADE		29	0.370742	1.1986	0.195857	0.426417	1	2356	tags=41%, list=28%, signal=57%
REACTOME_SIGNALING_BY_CYTOSOLIC_FGFR1_FUSION_MUTANTS	REACTOME_SIGNALING_BY_CYTOSOLIC_FGFR1_FUSION_MUTANTS		17	0.421841	1.19835	0.239464	0.424096	1	937	tags=18%, list=11%, signal=20%
REACTOME_SLC_TRANSPORTER_DISORDERS	REACTOME_SLC_TRANSPORTER_DISORDERS		61	0.314347	1.19674	0.153565	0.424672	1	2098	tags=41%, list=24%, signal=54%
REACTOME_CDC42_GTPASE_CYCLE	REACTOME_CDC42_GTPASE_CYCLE		124	0.279451	1.1954	0.136143	0.424744	1	1926	tags=27%, list=22%, signal=35%
REACTOME_METABOLISM_OF_ANGIOTENSINOGEN_TO_ANGIOTENSINS	REACTOME_METABOLISM_OF_ANGIOTENSINOGEN_TO_ANGIOTENSINS		15	0.426519	1.18898	0.255361	0.435196	1	735	tags=33%, list=9%, signal=36%
REACTOME_CHAPERONE_MEDIATED_AUTOPHAGY	REACTOME_CHAPERONE_MEDIATED_AUTOPHAGY		17	0.411668	1.17229	0.254	0.46996	1	343	tags=24%, list=4%, signal=24%
REACTOME_TRANSLATION_OF_SARS_COV_2_STRUCTURAL_PROTEINS	REACTOME_TRANSLATION_OF_SARS_COV_2_STRUCTURAL_PROTEINS		32	0.343565	1.15792	0.244123	0.500114	1	1435	tags=28%, list=17%, signal=34%
REACTOME_RNA_POLYMERASE_III_TRANSCRIPTION	REACTOME_RNA_POLYMERASE_III_TRANSCRIPTION		30	0.343219	1.15379	0.262664	0.506648	1	1054	tags=13%, list=12%, signal=15%
REACTOME_DISEASES_OF_CARBOHYDRATE_METABOLISM	REACTOME_DISEASES_OF_CARBOHYDRATE_METABOLISM		23	0.375003	1.14889	0.260223	0.515098	1	1306	tags=35%, list=15%, signal=41%
REACTOME_MAP2K_AND_MAPK_ACTIVATION	REACTOME_MAP2K_AND_MAPK_ACTIVATION		37	0.329896	1.14646	0.258912	0.517914	1	2352	tags=46%, list=27%, signal=63%
REACTOME_CYTOKINE_SIGNALING_IN_IMMUNE_SYSTEM	REACTOME_CYTOKINE_SIGNALING_IN_IMMUNE_SYSTEM		409	0.228824	1.14419	0.116244	0.520096	1	2078	tags=29%, list=24%, signal=36%
REACTOME_RNA_POLYMERASE_III_TRANSCRIPTION_INITIATION_FROM_TYPE_3_PROMOTER	REACTOME_RNA_POLYMERASE_III_TRANSCRIPTION_INITIATION_FROM_TYPE_3_PROMOTER		17	0.403688	1.14415	0.282883	0.516914	1	1054	tags=18%, list=12%, signal=20%
REACTOME_INFECTION_WITH_MYCOBACTERIUM_TUBERCULOSIS	REACTOME_INFECTION_WITH_MYCOBACTERIUM_TUBERCULOSIS		22	0.367324	1.14149	0.274864	0.519958	1	1756	tags=32%, list=20%, signal=40%
REACTOME_RHO_GTPASE_CYCLE	REACTOME_RHO_GTPASE_CYCLE		358	0.231732	1.1406	0.140909	0.518974	1	1955	tags=25%, list=23%, signal=31%
REACTOME_SIGNALING_BY_FGFR_IN_DISEASE	REACTOME_SIGNALING_BY_FGFR_IN_DISEASE		44	0.319228	1.13433	0.258004	0.531521	1	1051	tags=18%, list=12%, signal=21%
REACTOME_INTERLEUKIN_2_FAMILY_SIGNALING	REACTOME_INTERLEUKIN_2_FAMILY_SIGNALING		25	0.355245	1.13107	0.292419	0.536166	1	190	tags=8%, list=2%, signal=8%
REACTOME_NCAM_SIGNALING_FOR_NEURITE_OUT_GROWTH	REACTOME_NCAM_SIGNALING_FOR_NEURITE_OUT_GROWTH		39	0.321818	1.12593	0.264259	0.545464	1	1411	tags=31%, list=16%, signal=37%
REACTOME_CARGO_CONCENTRATION_IN_THE_ER	REACTOME_CARGO_CONCENTRATION_IN_THE_ER		23	0.365127	1.12323	0.294776	0.548692	1	2897	tags=57%, list=34%, signal=85%
REACTOME_DISEASES_ASSOCIATED_WITH_GLYCOSYLATION_PRECURSOR_BIOSYNTHESIS	REACTOME_DISEASES_ASSOCIATED_WITH_GLYCOSYLATION_PRECURSOR_BIOSYNTHESIS		15	0.402377	1.11769	0.310621	0.558956	1	1186	tags=53%, list=14%, signal=62%
REACTOME_FCGAMMA_RECEPTOR_FCGR_DEPENDENT_PHAGOCYTOSIS	REACTOME_FCGAMMA_RECEPTOR_FCGR_DEPENDENT_PHAGOCYTOSIS		78	0.282111	1.11747	0.243993	0.556161	1	2006	tags=29%, list=23%, signal=38%
REACTOME_RND2_GTPASE_CYCLE	REACTOME_RND2_GTPASE_CYCLE		34	0.323672	1.11681	0.285455	0.554448	1	832	tags=18%, list=10%, signal=19%
REACTOME_G_ALPHA_Q_SIGNALLING_EVENTS	REACTOME_G_ALPHA_Q_SIGNALLING_EVENTS		77	0.27703	1.11654	0.256803	0.551772	1	1461	tags=21%, list=17%, signal=25%
REACTOME_DETOXIFICATION_OF_REACTIVE_OXYGEN_SPECIES	REACTOME_DETOXIFICATION_OF_REACTIVE_OXYGEN_SPECIES		31	0.338907	1.11536	0.281426	0.551049	1	2313	tags=48%, list=27%, signal=66%
REACTOME_ION_CHANNEL_TRANSPORT	REACTOME_ION_CHANNEL_TRANSPORT		84	0.2712	1.10464	0.281787	0.574394	1	1836	tags=33%, list=21%, signal=42%
REACTOME_TOLL_LIKE_RECEPTOR_TLR1_TLR2_CASCADE	REACTOME_TOLL_LIKE_RECEPTOR_TLR1_TLR2_CASCADE		75	0.274902	1.09751	0.293194	0.588796	1	1457	tags=23%, list=17%, signal=27%
REACTOME_SENSORY_PROCESSING_OF_SOUND_BY_OUTER_HAIR_CELLS_OF_THE_COCHLEA	REACTOME_SENSORY_PROCESSING_OF_SOUND_BY_OUTER_HAIR_CELLS_OF_THE_COCHLEA		27	0.336575	1.08961	0.332703	0.6055	1	712	tags=22%, list=8%, signal=24%
REACTOME_VISUAL_PHOTOTRANSDUCTION	REACTOME_VISUAL_PHOTOTRANSDUCTION		44	0.306401	1.08925	0.326454	0.602968	1	1724	tags=34%, list=20%, signal=42%
REACTOME_GENE_SILENCING_BY_RNA	REACTOME_GENE_SILENCING_BY_RNA		67	0.275563	1.08621	0.3213	0.607413	1	2223	tags=36%, list=26%, signal=48%
REACTOME_TRANSCRIPTIONAL_REGULATION_BY_SMALL_RNAS	REACTOME_TRANSCRIPTIONAL_REGULATION_BY_SMALL_RNAS		51	0.287959	1.0572	0.361552	0.682398	1	2223	tags=37%, list=26%, signal=50%
REACTOME_SIGNALING_BY_TGFB_FAMILY_MEMBERS	REACTOME_SIGNALING_BY_TGFB_FAMILY_MEMBERS		63	0.272937	1.05561	0.347048	0.683077	1	604	tags=14%, list=7%, signal=15%
REACTOME_EPH_EPHRIN_SIGNALING	REACTOME_EPH_EPHRIN_SIGNALING		67	0.272913	1.0552	0.349914	0.680318	1	2910	tags=40%, list=34%, signal=61%
REACTOME_SENSORY_PERCEPTION	REACTOME_SENSORY_PERCEPTION		88	0.258588	1.04924	0.366149	0.69346	1	1580	tags=28%, list=18%, signal=34%
REACTOME_SIGNALING_BY_VEGF	REACTOME_SIGNALING_BY_VEGF		94	0.253271	1.04914	0.353952	0.68981	1	2064	tags=29%, list=24%, signal=37%
REACTOME_NUCLEAR_ENVELOPE_NE_REASSEMBLY	REACTOME_NUCLEAR_ENVELOPE_NE_REASSEMBLY		65	0.272915	1.0445	0.373002	0.698821	1	2262	tags=40%, list=26%, signal=54%
REACTOME_NR1H2_AND_NR1H3_MEDIATED_SIGNALING	REACTOME_NR1H2_AND_NR1H3_MEDIATED_SIGNALING		34	0.313254	1.04064	0.371534	0.705476	1	2162	tags=41%, list=25%, signal=55%
REACTOME_TRANSPORT_OF_BILE_SALTS_AND_ORGANIC_ACIDS_METAL_IONS_AND_AMINE_COMPOUNDS	REACTOME_TRANSPORT_OF_BILE_SALTS_AND_ORGANIC_ACIDS_METAL_IONS_AND_AMINE_COMPOUNDS		35	0.302725	1.03669	0.420956	0.712671	1	2097	tags=40%, list=24%, signal=53%
REACTOME_MTORC1_MEDIATED_SIGNALLING	REACTOME_MTORC1_MEDIATED_SIGNALLING		21	0.342133	1.03342	0.407273	0.717848	1	1393	tags=29%, list=16%, signal=34%
REACTOME_EXTRA_NUCLEAR_ESTROGEN_SIGNALING	REACTOME_EXTRA_NUCLEAR_ESTROGEN_SIGNALING		53	0.274615	1.03146	0.39523	0.719375	1	2064	tags=30%, list=24%, signal=40%
REACTOME_RHOB_GTPASE_CYCLE	REACTOME_RHOB_GTPASE_CYCLE		61	0.268828	1.03026	0.381757	0.719094	1	1376	tags=18%, list=16%, signal=21%
REACTOME_NUCLEAR_ENVELOPE_BREAKDOWN	REACTOME_NUCLEAR_ENVELOPE_BREAKDOWN		48	0.283811	1.02426	0.414211	0.731956	1	2223	tags=42%, list=26%, signal=56%
REACTOME_LEISHMANIA_INFECTION	REACTOME_LEISHMANIA_INFECTION		127	0.236259	1.02396	0.410299	0.728902	1	1459	tags=20%, list=17%, signal=24%
REACTOME_ANTIMICROBIAL_PEPTIDES	REACTOME_ANTIMICROBIAL_PEPTIDES		27	0.324184	1.02221	0.420039	0.729988	1	2122	tags=44%, list=25%, signal=59%
REACTOME_PROTEIN_PROTEIN_INTERACTIONS_AT_SYNAPSES	REACTOME_PROTEIN_PROTEIN_INTERACTIONS_AT_SYNAPSES		31	0.305196	1.0182	0.414722	0.737445	1	1971	tags=39%, list=23%, signal=50%
REACTOME_METABOLISM_OF_STEROID_HORMONES	REACTOME_METABOLISM_OF_STEROID_HORMONES		16	0.361007	1.01727	0.448405	0.736165	1	778	tags=25%, list=9%, signal=27%
REACTOME_PLASMA_LIPOPROTEIN_ASSEMBLY	REACTOME_PLASMA_LIPOPROTEIN_ASSEMBLY		15	0.368355	1.01622	0.457786	0.735286	1	1630	tags=40%, list=19%, signal=49%
REACTOME_PI_METABOLISM	REACTOME_PI_METABOLISM		67	0.263636	1.01092	0.428319	0.746545	1	2060	tags=31%, list=24%, signal=41%
REACTOME_G_ALPHA_I_SIGNALLING_EVENTS	REACTOME_G_ALPHA_I_SIGNALLING_EVENTS		94	0.241998	1.00691	0.451448	0.75362	1	1336	tags=21%, list=16%, signal=25%
REACTOME_PEPTIDE_HORMONE_METABOLISM	REACTOME_PEPTIDE_HORMONE_METABOLISM		51	0.268233	1.00516	0.426229	0.754488	1	455	tags=14%, list=5%, signal=14%
REACTOME_SUMOYLATION_OF_CHROMATIN_ORGANIZATION_PROTEINS	REACTOME_SUMOYLATION_OF_CHROMATIN_ORGANIZATION_PROTEINS		46	0.276283	0.989821	0.458781	0.794032	1	2766	tags=52%, list=32%, signal=77%
REACTOME_COMPLEX_I_BIOGENESIS	REACTOME_COMPLEX_I_BIOGENESIS		45	0.279585	0.989589	0.477558	0.790654	1	1260	tags=13%, list=15%, signal=16%
REACTOME_HCMV_INFECTION	REACTOME_HCMV_INFECTION		91	0.238442	0.981127	0.48552	0.811008	1	2333	tags=36%, list=27%, signal=49%
REACTOME_INTERFERON_SIGNALING	REACTOME_INTERFERON_SIGNALING		125	0.229148	0.976743	0.487135	0.819509	1	2223	tags=34%, list=26%, signal=46%
REACTOME_CLATHRIN_MEDIATED_ENDOCYTOSIS	REACTOME_CLATHRIN_MEDIATED_ENDOCYTOSIS		103	0.231068	0.976471	0.488055	0.816089	1	2501	tags=31%, list=29%, signal=43%
REACTOME_SUMOYLATION_OF_RNA_BINDING_PROTEINS	REACTOME_SUMOYLATION_OF_RNA_BINDING_PROTEINS		42	0.274327	0.976362	0.490602	0.812322	1	2335	tags=43%, list=27%, signal=59%
REACTOME_TAK1_ACTIVATES_NFKB_BY_PHOSPHORYLATION_AND_ACTIVATION_OF_IKKS_COMPLEX	REACTOME_TAK1_ACTIVATES_NFKB_BY_PHOSPHORYLATION_AND_ACTIVATION_OF_IKKS_COMPLEX		23	0.314434	0.97362	0.495183	0.816312	1	1327	tags=26%, list=15%, signal=31%
REACTOME_RHOQ_GTPASE_CYCLE	REACTOME_RHOQ_GTPASE_CYCLE		53	0.261151	0.970229	0.507909	0.82185	1	1393	tags=21%, list=16%, signal=25%
REACTOME_PHOSPHOLIPID_METABOLISM	REACTOME_PHOSPHOLIPID_METABOLISM		149	0.219054	0.963909	0.549342	0.836115	1	2060	tags=30%, list=24%, signal=39%
REACTOME_SIGNALING_BY_INTERLEUKINS	REACTOME_SIGNALING_BY_INTERLEUKINS		267	0.20009	0.959603	0.577107	0.844414	1	2078	tags=26%, list=24%, signal=33%
REACTOME_HIV_LIFE_CYCLE	REACTOME_HIV_LIFE_CYCLE		128	0.221012	0.955846	0.540323	0.851163	1	2766	tags=40%, list=32%, signal=58%
REACTOME_SENSORY_PROCESSING_OF_SOUND	REACTOME_SENSORY_PROCESSING_OF_SOUND		39	0.275846	0.950067	0.551282	0.863713	1	712	tags=18%, list=8%, signal=19%
REACTOME_SEALING_OF_THE_NUCLEAR_ENVELOPE_NE_BY_ESCRT_III	REACTOME_SEALING_OF_THE_NUCLEAR_ENVELOPE_NE_BY_ESCRT_III		23	0.303053	0.94991	0.525591	0.859998	1	2262	tags=39%, list=26%, signal=53%
REACTOME_SIGNALING_BY_MODERATE_KINASE_ACTIVITY_BRAF_MUTANTS	REACTOME_SIGNALING_BY_MODERATE_KINASE_ACTIVITY_BRAF_MUTANTS		41	0.269239	0.949203	0.540892	0.857776	1	2299	tags=39%, list=27%, signal=53%
REACTOME_TRANS_GOLGI_NETWORK_VESICLE_BUDDING	REACTOME_TRANS_GOLGI_NETWORK_VESICLE_BUDDING		63	0.243623	0.942981	0.564428	0.871641	1	2505	tags=43%, list=29%, signal=60%
REACTOME_FLT3_SIGNALING_IN_DISEASE	REACTOME_FLT3_SIGNALING_IN_DISEASE		20	0.318812	0.941004	0.52459	0.873054	1	200	tags=10%, list=2%, signal=10%
REACTOME_SELECTIVE_AUTOPHAGY	REACTOME_SELECTIVE_AUTOPHAGY		62	0.241147	0.93933	0.575701	0.873599	1	2333	tags=34%, list=27%, signal=46%
REACTOME_UNFOLDED_PROTEIN_RESPONSE_UPR	REACTOME_UNFOLDED_PROTEIN_RESPONSE_UPR		66	0.242963	0.93388	0.578671	0.884993	1	2039	tags=30%, list=24%, signal=39%
REACTOME_CLASS_I_MHC_MEDIATED_ANTIGEN_PROCESSING_PRESENTATION	REACTOME_CLASS_I_MHC_MEDIATED_ANTIGEN_PROCESSING_PRESENTATION		245	0.196901	0.932761	0.644917	0.883959	1	1720	tags=18%, list=20%, signal=21%
REACTOME_STIMULI_SENSING_CHANNELS	REACTOME_STIMULI_SENSING_CHANNELS		38	0.270012	0.932246	0.566108	0.881317	1	1817	tags=32%, list=21%, signal=40%
REACTOME_RHOG_GTPASE_CYCLE	REACTOME_RHOG_GTPASE_CYCLE		64	0.241328	0.929777	0.550347	0.884077	1	793	tags=13%, list=9%, signal=14%
REACTOME_PRE_NOTCH_EXPRESSION_AND_PROCESSING	REACTOME_PRE_NOTCH_EXPRESSION_AND_PROCESSING		40	0.265893	0.925662	0.58018	0.891601	1	2162	tags=35%, list=25%, signal=47%
REACTOME_DISASSEMBLY_OF_THE_DESTRUCTION_COMPLEX_AND_RECRUITMENT_OF_AXIN_TO_THE_MEMBRANE	REACTOME_DISASSEMBLY_OF_THE_DESTRUCTION_COMPLEX_AND_RECRUITMENT_OF_AXIN_TO_THE_MEMBRANE		21	0.303671	0.917758	0.576699	0.909307	1	1159	tags=24%, list=14%, signal=27%
REACTOME_TRANSLATION_OF_SARS_COV_1_STRUCTURAL_PROTEINS	REACTOME_TRANSLATION_OF_SARS_COV_1_STRUCTURAL_PROTEINS		18	0.318854	0.911772	0.594843	0.921596	1	323	tags=11%, list=4%, signal=12%
REACTOME_MAPK_FAMILY_SIGNALING_CASCADES	REACTOME_MAPK_FAMILY_SIGNALING_CASCADES		207	0.196832	0.910494	0.706539	0.920985	1	1780	tags=22%, list=21%, signal=27%
REACTOME_DAP12_INTERACTIONS	REACTOME_DAP12_INTERACTIONS		26	0.287487	0.901275	0.609403	0.942298	1	227	tags=8%, list=3%, signal=8%
REACTOME_SNRNP_ASSEMBLY	REACTOME_SNRNP_ASSEMBLY		50	0.244348	0.899531	0.61811	0.943194	1	2223	tags=36%, list=26%, signal=48%
REACTOME_PURINERGIC_SIGNALING_IN_LEISHMANIASIS_INFECTION	REACTOME_PURINERGIC_SIGNALING_IN_LEISHMANIASIS_INFECTION		21	0.29698	0.89637	0.601145	0.947313	1	1442	tags=33%, list=17%, signal=40%
REACTOME_EFFECTS_OF_PIP2_HYDROLYSIS	REACTOME_EFFECTS_OF_PIP2_HYDROLYSIS		16	0.327702	0.890058	0.624088	0.959215	1	2745	tags=50%, list=32%, signal=73%
REACTOME_SPHINGOLIPID_DE_NOVO_BIOSYNTHESIS	REACTOME_SPHINGOLIPID_DE_NOVO_BIOSYNTHESIS		26	0.273177	0.881705	0.629981	0.977294	1	1772	tags=31%, list=21%, signal=39%
REACTOME_O_LINKED_GLYCOSYLATION_OF_MUCINS	REACTOME_O_LINKED_GLYCOSYLATION_OF_MUCINS		27	0.276854	0.877672	0.632246	0.983758	1	1320	tags=30%, list=15%, signal=35%
REACTOME_GROWTH_HORMONE_RECEPTOR_SIGNALING	REACTOME_GROWTH_HORMONE_RECEPTOR_SIGNALING		15	0.319174	0.871167	0.643678	0.99651	1	3079	tags=60%, list=36%, signal=93%
REACTOME_RHOH_GTPASE_CYCLE	REACTOME_RHOH_GTPASE_CYCLE		32	0.259781	0.868246	0.685185	0.999424	1	1656	tags=22%, list=19%, signal=27%
REACTOME_SIGNALING_BY_GPCR	REACTOME_SIGNALING_BY_GPCR		203	0.188323	0.863927	0.817133	1	1	1478	tags=19%, list=17%, signal=22%
REACTOME_METABOLISM_OF_PORPHYRINS	REACTOME_METABOLISM_OF_PORPHYRINS		23	0.278847	0.862266	0.672131	1	1	1039	tags=22%, list=12%, signal=25%
REACTOME_RAS_PROCESSING	REACTOME_RAS_PROCESSING		18	0.293478	0.859756	0.667297	1	1	2061	tags=33%, list=24%, signal=44%
REACTOME_SIGNALING_BY_WNT_IN_CANCER	REACTOME_SIGNALING_BY_WNT_IN_CANCER		21	0.284093	0.856562	0.656863	1	1	1694	tags=29%, list=20%, signal=36%
REACTOME_SIGNALING_BY_HIPPO	REACTOME_SIGNALING_BY_HIPPO		15	0.309353	0.85388	0.64751	1	1	626	tags=13%, list=7%, signal=14%
REACTOME_NOTCH_HLH_TRANSCRIPTION_PATHWAY	REACTOME_NOTCH_HLH_TRANSCRIPTION_PATHWAY		20	0.286228	0.852985	0.654917	1	1	815	tags=15%, list=10%, signal=17%
REACTOME_SIGNALING_BY_BRAF_AND_RAF_FUSIONS	REACTOME_SIGNALING_BY_BRAF_AND_RAF_FUSIONS		57	0.220143	0.847255	0.760638	1	1	1251	tags=21%, list=15%, signal=24%
REACTOME_GOLGI_ASSOCIATED_VESICLE_BIOGENESIS	REACTOME_GOLGI_ASSOCIATED_VESICLE_BIOGENESIS		51	0.225816	0.845491	0.723684	1	1	2505	tags=41%, list=29%, signal=58%
REACTOME_TBC_RABGAPS	REACTOME_TBC_RABGAPS		36	0.246843	0.844122	0.713761	1	1	1471	tags=17%, list=17%, signal=20%
REACTOME_CONSTITUTIVE_SIGNALING_BY_AKT1_E17K_IN_CANCER	REACTOME_CONSTITUTIVE_SIGNALING_BY_AKT1_E17K_IN_CANCER		20	0.282798	0.843578	0.681481	1	1	2064	tags=30%, list=24%, signal=39%
REACTOME_CILIUM_ASSEMBLY	REACTOME_CILIUM_ASSEMBLY		127	0.193838	0.840658	0.818792	1	1	1965	tags=25%, list=23%, signal=32%
REACTOME_RHO_GTPASE_EFFECTORS	REACTOME_RHO_GTPASE_EFFECTORS		198	0.182508	0.839471	0.869085	1	1	2096	tags=27%, list=24%, signal=35%
REACTOME_HDMS_DEMETHYLATE_HISTONES	REACTOME_HDMS_DEMETHYLATE_HISTONES		19	0.291045	0.839305	0.697297	1	1	1995	tags=32%, list=23%, signal=41%
REACTOME_PROTEIN_LOCALIZATION	REACTOME_PROTEIN_LOCALIZATION		131	0.192839	0.836404	0.826377	1	1	1814	tags=21%, list=21%, signal=26%
REACTOME_RHOD_GTPASE_CYCLE	REACTOME_RHOD_GTPASE_CYCLE		44	0.232539	0.833162	0.740672	1	1	1213	tags=18%, list=14%, signal=21%
REACTOME_SLC_MEDIATED_TRANSMEMBRANE_TRANSPORT	REACTOME_SLC_MEDIATED_TRANSMEMBRANE_TRANSPORT		103	0.198041	0.830296	0.823024	1	1	1556	tags=20%, list=18%, signal=25%
REACTOME_INTERLEUKIN_3_INTERLEUKIN_5_AND_GM_CSF_SIGNALING	REACTOME_INTERLEUKIN_3_INTERLEUKIN_5_AND_GM_CSF_SIGNALING		33	0.245646	0.827826	0.762808	1	1	190	tags=6%, list=2%, signal=6%
REACTOME_ENERGY_DEPENDENT_REGULATION_OF_MTOR_BY_LKB1_AMPK	REACTOME_ENERGY_DEPENDENT_REGULATION_OF_MTOR_BY_LKB1_AMPK		23	0.268538	0.827355	0.712381	1	1	1984	tags=39%, list=23%, signal=51%
REACTOME_TRAF6_MEDIATED_NF_KB_ACTIVATION	REACTOME_TRAF6_MEDIATED_NF_KB_ACTIVATION		21	0.274355	0.821726	0.717308	1	1	1929	tags=24%, list=23%, signal=31%
REACTOME_NEGATIVE_REGULATION_OF_FGFR1_SIGNALING	REACTOME_NEGATIVE_REGULATION_OF_FGFR1_SIGNALING		16	0.292257	0.81288	0.729167	1	1	1483	tags=25%, list=17%, signal=30%
REACTOME_RHO_GTPASES_ACTIVATE_NADPH_OXIDASES	REACTOME_RHO_GTPASES_ACTIVATE_NADPH_OXIDASES		20	0.275348	0.811518	0.730402	1	1	938	tags=15%, list=11%, signal=17%
REACTOME_GLYOXYLATE_METABOLISM_AND_GLYCINE_DEGRADATION	REACTOME_GLYOXYLATE_METABOLISM_AND_GLYCINE_DEGRADATION		26	0.256095	0.810212	0.734406	1	1	2084	tags=27%, list=24%, signal=35%
REACTOME_SMOOTH_MUSCLE_CONTRACTION	REACTOME_SMOOTH_MUSCLE_CONTRACTION		31	0.247796	0.810155	0.746741	1	1	1988	tags=32%, list=23%, signal=42%
REACTOME_TOLL_LIKE_RECEPTOR_9_TLR9_CASCADE	REACTOME_TOLL_LIKE_RECEPTOR_9_TLR9_CASCADE		68	0.206942	0.808181	0.827883	1	1	1465	tags=21%, list=17%, signal=25%
REACTOME_ROLE_OF_PHOSPHOLIPIDS_IN_PHAGOCYTOSIS	REACTOME_ROLE_OF_PHOSPHOLIPIDS_IN_PHAGOCYTOSIS		22	0.27055	0.808068	0.751391	1	1	1943	tags=27%, list=23%, signal=35%
REACTOME_SYNTHESIS_OF_PIPS_AT_THE_PLASMA_MEMBRANE	REACTOME_SYNTHESIS_OF_PIPS_AT_THE_PLASMA_MEMBRANE		41	0.22672	0.805284	0.795802	1	1	2243	tags=32%, list=26%, signal=43%
REACTOME_CARGO_RECOGNITION_FOR_CLATHRIN_MEDIATED_ENDOCYTOSIS	REACTOME_CARGO_RECOGNITION_FOR_CLATHRIN_MEDIATED_ENDOCYTOSIS		66	0.206272	0.803681	0.834234	1	1	2501	tags=29%, list=29%, signal=40%
REACTOME_RESPONSE_OF_MTB_TO_PHAGOCYTOSIS	REACTOME_RESPONSE_OF_MTB_TO_PHAGOCYTOSIS		18	0.2802	0.802027	0.730769	1	1	1756	tags=28%, list=20%, signal=35%
REACTOME_ONCOGENIC_MAPK_SIGNALING	REACTOME_ONCOGENIC_MAPK_SIGNALING		65	0.205679	0.793768	0.842491	1	1	1251	tags=20%, list=15%, signal=23%
REACTOME_SIGNALING_BY_RETINOIC_ACID	REACTOME_SIGNALING_BY_RETINOIC_ACID		28	0.242185	0.792088	0.774131	1	1	1249	tags=18%, list=15%, signal=21%
REACTOME_NONHOMOLOGOUS_END_JOINING_NHEJ	REACTOME_NONHOMOLOGOUS_END_JOINING_NHEJ		31	0.243164	0.788139	0.793233	1	1	521	tags=10%, list=6%, signal=10%
REACTOME_NUCLEAR_SIGNALING_BY_ERBB4	REACTOME_NUCLEAR_SIGNALING_BY_ERBB4		16	0.281862	0.786903	0.770609	1	1	1595	tags=31%, list=19%, signal=38%
REACTOME_RND1_GTPASE_CYCLE	REACTOME_RND1_GTPASE_CYCLE		34	0.231849	0.784148	0.787313	1	1	776	tags=12%, list=9%, signal=13%
REACTOME_EPH_EPHRIN_MEDIATED_REPULSION_OF_CELLS	REACTOME_EPH_EPHRIN_MEDIATED_REPULSION_OF_CELLS		31	0.234859	0.783248	0.802657	1	1	2910	tags=42%, list=34%, signal=63%
REACTOME_INSULIN_PROCESSING	REACTOME_INSULIN_PROCESSING		20	0.26156	0.781098	0.779783	1	1	381	tags=10%, list=4%, signal=10%
REACTOME_ADAPTIVE_IMMUNE_SYSTEM	REACTOME_ADAPTIVE_IMMUNE_SYSTEM		481	0.15062	0.767668	0.998557	1	1	1765	tags=18%, list=21%, signal=21%
REACTOME_REGULATION_OF_LIPID_METABOLISM_BY_PPARALPHA	REACTOME_REGULATION_OF_LIPID_METABOLISM_BY_PPARALPHA		84	0.184859	0.752439	0.920742	1	1	499	tags=7%, list=6%, signal=8%
REACTOME_RNA_POLYMERASE_III_TRANSCRIPTION_INITIATION_FROM_TYPE_1_PROMOTER	REACTOME_RNA_POLYMERASE_III_TRANSCRIPTION_INITIATION_FROM_TYPE_1_PROMOTER		23	0.249184	0.751611	0.80814	1	1	972	tags=9%, list=11%, signal=10%
REACTOME_TRANSPORT_OF_VITAMINS_NUCLEOSIDES_AND_RELATED_MOLECULES	REACTOME_TRANSPORT_OF_VITAMINS_NUCLEOSIDES_AND_RELATED_MOLECULES		23	0.238247	0.735703	0.837638	1	1	2098	tags=26%, list=24%, signal=34%
REACTOME_AMINO_ACID_TRANSPORT_ACROSS_THE_PLASMA_MEMBRANE	REACTOME_AMINO_ACID_TRANSPORT_ACROSS_THE_PLASMA_MEMBRANE		18	0.251574	0.733197	0.812977	1	1	40	tags=6%, list=0%, signal=6%
REACTOME_MTOR_SIGNALLING	REACTOME_MTOR_SIGNALLING		35	0.212991	0.731714	0.868705	1	1	2064	tags=31%, list=24%, signal=41%
REACTOME_ANTIGEN_ACTIVATES_B_CELL_RECEPTOR_BCR_LEADING_TO_GENERATION_OF_SECOND_MESSENGERS	REACTOME_ANTIGEN_ACTIVATES_B_CELL_RECEPTOR_BCR_LEADING_TO_GENERATION_OF_SECOND_MESSENGERS		29	0.228583	0.729426	0.874074	1	1	93	tags=7%, list=1%, signal=7%
REACTOME_SIGNALING_BY_FLT3_FUSION_PROTEINS	REACTOME_SIGNALING_BY_FLT3_FUSION_PROTEINS		16	0.254418	0.726755	0.831481	1	1	53	tags=6%, list=1%, signal=6%
REACTOME_METABOLISM_OF_NITRIC_OXIDE_NOS3_ACTIVATION_AND_REGULATION	REACTOME_METABOLISM_OF_NITRIC_OXIDE_NOS3_ACTIVATION_AND_REGULATION		15	0.261708	0.725464	0.831216	1	1	428	tags=13%, list=5%, signal=14%
REACTOME_COPII_MEDIATED_VESICLE_TRANSPORT	REACTOME_COPII_MEDIATED_VESICLE_TRANSPORT		55	0.193219	0.721509	0.908257	1	1	2897	tags=38%, list=34%, signal=57%
REACTOME_RHOU_GTPASE_CYCLE	REACTOME_RHOU_GTPASE_CYCLE		31	0.214692	0.712975	0.882798	1	1	209	tags=6%, list=2%, signal=7%
REACTOME_JNK_C_JUN_KINASES_PHOSPHORYLATION_AND_ACTIVATION_MEDIATED_BY_ACTIVATED_HUMAN_TAK1	REACTOME_JNK_C_JUN_KINASES_PHOSPHORYLATION_AND_ACTIVATION_MEDIATED_BY_ACTIVATED_HUMAN_TAK1		15	0.255302	0.711552	0.831776	1	1	1794	tags=33%, list=21%, signal=42%
REACTOME_EPHB_MEDIATED_FORWARD_SIGNALING	REACTOME_EPHB_MEDIATED_FORWARD_SIGNALING		35	0.209318	0.71107	0.881387	1	1	2264	tags=23%, list=26%, signal=31%
REACTOME_MITOTIC_PROPHASE	REACTOME_MITOTIC_PROPHASE		76	0.177275	0.706745	0.946644	1	1	2096	tags=29%, list=24%, signal=38%
REACTOME_FCERI_MEDIATED_MAPK_ACTIVATION	REACTOME_FCERI_MEDIATED_MAPK_ACTIVATION		29	0.213549	0.704626	0.902752	1	1	2341	tags=34%, list=27%, signal=47%
REACTOME_EPHRIN_SIGNALING	REACTOME_EPHRIN_SIGNALING		15	0.255151	0.703602	0.866545	1	1	214	tags=7%, list=2%, signal=7%
REACTOME_CYTOSOLIC_SENSORS_OF_PATHOGEN_ASSOCIATED_DNA	REACTOME_CYTOSOLIC_SENSORS_OF_PATHOGEN_ASSOCIATED_DNA		50	0.188982	0.692281	0.944853	1	1	2038	tags=18%, list=24%, signal=23%
REACTOME_CASPASE_ACTIVATION_VIA_EXTRINSIC_APOPTOTIC_SIGNALLING_PATHWAY	REACTOME_CASPASE_ACTIVATION_VIA_EXTRINSIC_APOPTOTIC_SIGNALLING_PATHWAY		16	0.246881	0.684466	0.879541	1	1	2445	tags=38%, list=29%, signal=52%
REACTOME_RHOF_GTPASE_CYCLE	REACTOME_RHOF_GTPASE_CYCLE		35	0.197438	0.678012	0.92037	1	1	1337	tags=14%, list=16%, signal=17%
REACTOME_GOLGI_TO_ER_RETROGRADE_TRANSPORT	REACTOME_GOLGI_TO_ER_RETROGRADE_TRANSPORT		103	0.161298	0.676681	0.988235	1	1	362	tags=6%, list=4%, signal=6%
REACTOME_INTRA_GOLGI_TRAFFIC	REACTOME_INTRA_GOLGI_TRAFFIC		35	0.200863	0.671601	0.935424	1	1	41	tags=3%, list=0%, signal=3%
REACTOME_RAB_GEFS_EXCHANGE_GTP_FOR_GDP_ON_RABS	REACTOME_RAB_GEFS_EXCHANGE_GTP_FOR_GDP_ON_RABS		74	0.167716	0.668591	0.980736	1	1	2668	tags=30%, list=31%, signal=43%
REACTOME_MEMBRANE_TRAFFICKING	REACTOME_MEMBRANE_TRAFFICKING		483	0.132113	0.663218	1	1	1	2505	tags=26%, list=29%, signal=35%
REACTOME_RUNX1_REGULATES_GENES_INVOLVED_IN_MEGAKARYOCYTE_DIFFERENTIATION_AND_PLATELET_FUNCTION	REACTOME_RUNX1_REGULATES_GENES_INVOLVED_IN_MEGAKARYOCYTE_DIFFERENTIATION_AND_PLATELET_FUNCTION		40	0.185991	0.655329	0.967391	1	1	2162	tags=30%, list=25%, signal=40%
REACTOME_ANTIGEN_PRESENTATION_FOLDING_ASSEMBLY_AND_PEPTIDE_LOADING_OF_CLASS_I_MHC	REACTOME_ANTIGEN_PRESENTATION_FOLDING_ASSEMBLY_AND_PEPTIDE_LOADING_OF_CLASS_I_MHC		21	0.217136	0.655234	0.925512	1	1	47	tags=5%, list=1%, signal=5%
REACTOME_BASIGIN_INTERACTIONS	REACTOME_BASIGIN_INTERACTIONS		19	0.222584	0.654836	0.912409	1	1	2212	tags=37%, list=26%, signal=50%
REACTOME_RHO_GTPASES_ACTIVATE_FORMINS	REACTOME_RHO_GTPASES_ACTIVATE_FORMINS		92	0.16059	0.653371	0.987847	1	1	2096	tags=27%, list=24%, signal=36%
REACTOME_APOPTOTIC_CLEAVAGE_OF_CELLULAR_PROTEINS	REACTOME_APOPTOTIC_CLEAVAGE_OF_CELLULAR_PROTEINS		32	0.19436	0.649778	0.961183	1	1	1804	tags=25%, list=21%, signal=32%
REACTOME_NEGATIVE_REGULATION_OF_FGFR4_SIGNALING	REACTOME_NEGATIVE_REGULATION_OF_FGFR4_SIGNALING		15	0.225137	0.639473	0.909627	1	1	1483	tags=20%, list=17%, signal=24%
REACTOME_DOWNSTREAM_SIGNALING_OF_ACTIVATED_FGFR1	REACTOME_DOWNSTREAM_SIGNALING_OF_ACTIVATED_FGFR1		17	0.224732	0.638239	0.927757	1	1	1483	tags=24%, list=17%, signal=28%
REACTOME_DISEASES_OF_SIGNAL_TRANSDUCTION_BY_GROWTH_FACTOR_RECEPTORS_AND_SECOND_MESSENGERS	REACTOME_DISEASES_OF_SIGNAL_TRANSDUCTION_BY_GROWTH_FACTOR_RECEPTORS_AND_SECOND_MESSENGERS		272	0.132635	0.63266	1	1	1	1694	tags=17%, list=20%, signal=20%
REACTOME_NEGATIVE_REGULATION_OF_FGFR3_SIGNALING	REACTOME_NEGATIVE_REGULATION_OF_FGFR3_SIGNALING		15	0.225137	0.631824	0.912879	1	1	1483	tags=20%, list=17%, signal=24%
REACTOME_VXPX_CARGO_TARGETING_TO_CILIUM	REACTOME_VXPX_CARGO_TARGETING_TO_CILIUM		15	0.22563	0.627693	0.93295	1	1	2254	tags=27%, list=26%, signal=36%
REACTOME_COPI_INDEPENDENT_GOLGI_TO_ER_RETROGRADE_TRAFFIC	REACTOME_COPI_INDEPENDENT_GOLGI_TO_ER_RETROGRADE_TRAFFIC		44	0.173798	0.625606	0.960674	1	1	212	tags=5%, list=2%, signal=5%
REACTOME_REGULATION_OF_SIGNALING_BY_CBL	REACTOME_REGULATION_OF_SIGNALING_BY_CBL		17	0.222143	0.625064	0.924812	1	1	2833	tags=41%, list=33%, signal=61%
REACTOME_NEUREXINS_AND_NEUROLIGINS	REACTOME_NEUREXINS_AND_NEUROLIGINS		20	0.207767	0.620245	0.955473	1	1	1804	tags=30%, list=21%, signal=38%
REACTOME_SYNTHESIS_OF_BILE_ACIDS_AND_BILE_SALTS_VIA_7ALPHA_HYDROXYCHOLESTEROL	REACTOME_SYNTHESIS_OF_BILE_ACIDS_AND_BILE_SALTS_VIA_7ALPHA_HYDROXYCHOLESTEROL		17	0.218428	0.619752	0.944742	1	1	2605	tags=35%, list=30%, signal=51%
REACTOME_TRANSPORT_OF_MATURE_TRANSCRIPT_TO_CYTOPLASM	REACTOME_TRANSPORT_OF_MATURE_TRANSCRIPT_TO_CYTOPLASM		77	0.155704	0.61652	0.996491	1	1	2223	tags=25%, list=26%, signal=33%
REACTOME_NEGATIVE_REGULATION_OF_FGFR2_SIGNALING	REACTOME_NEGATIVE_REGULATION_OF_FGFR2_SIGNALING		15	0.225137	0.616222	0.931907	1	1	1483	tags=20%, list=17%, signal=24%
REACTOME_SUMOYLATION_OF_DNA_DAMAGE_RESPONSE_AND_REPAIR_PROTEINS	REACTOME_SUMOYLATION_OF_DNA_DAMAGE_RESPONSE_AND_REPAIR_PROTEINS		64	0.160521	0.615975	0.989011	1	1	2389	tags=31%, list=28%, signal=43%
REACTOME_P75_NTR_RECEPTOR_MEDIATED_SIGNALLING	REACTOME_P75_NTR_RECEPTOR_MEDIATED_SIGNALLING		69	0.156343	0.614881	0.994881	1	1	2041	tags=25%, list=24%, signal=32%
REACTOME_RETROGRADE_TRANSPORT_AT_THE_TRANS_GOLGI_NETWORK	REACTOME_RETROGRADE_TRANSPORT_AT_THE_TRANS_GOLGI_NETWORK		41	0.173198	0.614696	0.978873	1	1	906	tags=7%, list=11%, signal=8%
REACTOME_RUNX2_REGULATES_BONE_DEVELOPMENT	REACTOME_RUNX2_REGULATES_BONE_DEVELOPMENT		15	0.223041	0.613615	0.926923	1	1	2886	tags=47%, list=34%, signal=70%
REACTOME_SIGNALING_BY_ERBB4	REACTOME_SIGNALING_BY_ERBB4		30	0.18235	0.612404	0.952562	1	1	1595	tags=23%, list=19%, signal=29%
REACTOME_INTERLEUKIN_12_FAMILY_SIGNALING	REACTOME_INTERLEUKIN_12_FAMILY_SIGNALING		41	0.173982	0.610597	0.977312	1	1	721	tags=12%, list=8%, signal=13%
REACTOME_FCGR3A_MEDIATED_IL10_SYNTHESIS	REACTOME_FCGR3A_MEDIATED_IL10_SYNTHESIS		29	0.185889	0.605965	0.970425	1	1	983	tags=14%, list=11%, signal=16%
REACTOME_TRANSPORT_TO_THE_GOLGI_AND_SUBSEQUENT_MODIFICATION	REACTOME_TRANSPORT_TO_THE_GOLGI_AND_SUBSEQUENT_MODIFICATION		143	0.135288	0.601634	1	1	1	788	tags=8%, list=9%, signal=8%
REACTOME_SIGNALING_BY_PTK6	REACTOME_SIGNALING_BY_PTK6		35	0.173318	0.591209	0.979362	1	1	2064	tags=26%, list=24%, signal=34%
REACTOME_EGFR_DOWNREGULATION	REACTOME_EGFR_DOWNREGULATION		19	0.194347	0.576353	0.964912	1	1	2153	tags=37%, list=25%, signal=49%
REACTOME_SIGNALING_BY_CSF3_G_CSF	REACTOME_SIGNALING_BY_CSF3_G_CSF		22	0.189494	0.568734	0.983547	1	1	53	tags=5%, list=1%, signal=5%
REACTOME_CELL_DEATH_SIGNALLING_VIA_NRAGE_NRIF_AND_NADE	REACTOME_CELL_DEATH_SIGNALLING_VIA_NRAGE_NRIF_AND_NADE		53	0.15618	0.568429	0.989011	1	1	2041	tags=26%, list=24%, signal=34%
REACTOME_BRANCHED_CHAIN_AMINO_ACID_CATABOLISM	REACTOME_BRANCHED_CHAIN_AMINO_ACID_CATABOLISM		20	0.187103	0.563957	0.960452	1	1	2944	tags=40%, list=34%, signal=61%
REACTOME_FOXO_MEDIATED_TRANSCRIPTION_OF_OXIDATIVE_STRESS_METABOLIC_AND_NEURONAL_GENES	REACTOME_FOXO_MEDIATED_TRANSCRIPTION_OF_OXIDATIVE_STRESS_METABOLIC_AND_NEURONAL_GENES		16	0.200162	0.56188	0.964684	1	1	1373	tags=19%, list=16%, signal=22%
REACTOME_NEF_MEDIATES_DOWN_MODULATION_OF_CELL_SURFACE_RECEPTORS_BY_RECRUITING_THEM_TO_CLATHRIN_ADAPTERS	REACTOME_NEF_MEDIATES_DOWN_MODULATION_OF_CELL_SURFACE_RECEPTORS_BY_RECRUITING_THEM_TO_CLATHRIN_ADAPTERS		17	0.198542	0.559595	0.984526	1	1	2501	tags=35%, list=29%, signal=50%
REACTOME_SIGNALING_BY_NTRK2_TRKB	REACTOME_SIGNALING_BY_NTRK2_TRKB		17	0.199314	0.556494	0.959335	1	1	741	tags=12%, list=9%, signal=13%
REACTOME_TRANSCRIPTIONAL_REGULATION_BY_VENTX	REACTOME_TRANSCRIPTIONAL_REGULATION_BY_VENTX		30	0.172707	0.555518	0.979008	1	1	2162	tags=23%, list=25%, signal=31%
REACTOME_DEADENYLATION_OF_MRNA	REACTOME_DEADENYLATION_OF_MRNA		25	0.175359	0.554351	0.982387	1	1	1404	tags=12%, list=16%, signal=14%
REACTOME_THE_ROLE_OF_NEF_IN_HIV_1_REPLICATION_AND_DISEASE_PATHOGENESIS	REACTOME_THE_ROLE_OF_NEF_IN_HIV_1_REPLICATION_AND_DISEASE_PATHOGENESIS		24	0.171691	0.548303	0.988095	1	1	1842	tags=21%, list=22%, signal=26%
REACTOME_CD28_CO_STIMULATION	REACTOME_CD28_CO_STIMULATION		24	0.174412	0.547983	0.984877	1	1	7076	tags=100%, list=83%, signal=573%
REACTOME_FORMATION_OF_TC_NER_PRE_INCISION_COMPLEX	REACTOME_FORMATION_OF_TC_NER_PRE_INCISION_COMPLEX		42	0.155167	0.542418	0.979964	1	1	2586	tags=31%, list=30%, signal=44%
REACTOME_SIGNALING_BY_NOTCH3	REACTOME_SIGNALING_BY_NOTCH3		25	0.164631	0.523602	0.988658	1	1	3024	tags=44%, list=35%, signal=68%
REACTOME_FCERI_MEDIATED_CA_2_MOBILIZATION	REACTOME_FCERI_MEDIATED_CA_2_MOBILIZATION		27	0.160654	0.51013	0.998131	1	1	48	tags=4%, list=1%, signal=4%
REACTOME_DAP12_SIGNALING	REACTOME_DAP12_SIGNALING		25	0.1595	0.494943	0.996241	1	1	2403	tags=28%, list=28%, signal=39%
REACTOME_SIGNALING_BY_NOTCH1	REACTOME_SIGNALING_BY_NOTCH1		40	0.124283	0.433288	1	1	1	3120	tags=45%, list=36%, signal=70%
REACTOME_SIGNALING_BY_NOTCH1_PEST_DOMAIN_MUTANTS_IN_CANCER	REACTOME_SIGNALING_BY_NOTCH1_PEST_DOMAIN_MUTANTS_IN_CANCER		31	0.132733	0.42784	0.998103	1	1	3120	tags=48%, list=36%, signal=76%
REACTOME_ZBP1_DAI_MEDIATED_INDUCTION_OF_TYPE_I_IFNS	REACTOME_ZBP1_DAI_MEDIATED_INDUCTION_OF_TYPE_I_IFNS		18	0.138847	0.403089	1	1	1	7379	tags=100%, list=86%, signal=720%
REACTOME_MICRORNA_MIRNA_BIOGENESIS	REACTOME_MICRORNA_MIRNA_BIOGENESIS		22	0.130917	0.39503	0.998039	0.999752	1	2373	tags=27%, list=28%, signal=38%

## Sheet: REACTOME_up_in_KPC
NAME	GS<br> follow link to MSigDB	GS DETAILS	SIZE	ES	NES	NOM p-val	FDR q-val	FWER p-val	RANK AT MAX	LEADING EDGE
REACTOME_RRNA_PROCESSING	REACTOME_RRNA_PROCESSING	Details ...	186	-0.523085	-2.50001	0	0	0	2605	tags=61%, list=30%, signal=85%
REACTOME_RRNA_MODIFICATION_IN_THE_NUCLEUS_AND_CYTOSOL	REACTOME_RRNA_MODIFICATION_IN_THE_NUCLEUS_AND_CYTOSOL	Details ...	58	-0.615754	-2.44832	0	0	0	3032	tags=83%, list=35%, signal=127%
REACTOME_ACTIVATION_OF_GENE_EXPRESSION_BY_SREBF_SREBP	REACTOME_ACTIVATION_OF_GENE_EXPRESSION_BY_SREBF_SREBP	Details ...	34	-0.688138	-2.4351	0	0	0	1224	tags=59%, list=14%, signal=68%
REACTOME_EUKARYOTIC_TRANSLATION_ELONGATION	REACTOME_EUKARYOTIC_TRANSLATION_ELONGATION	Details ...	83	-0.560662	-2.37409	0	0	0	2938	tags=70%, list=34%, signal=105%
REACTOME_CHOLESTEROL_BIOSYNTHESIS	REACTOME_CHOLESTEROL_BIOSYNTHESIS	Details ...	19	-0.769504	-2.36069	0	0	0	1165	tags=68%, list=14%, signal=79%
REACTOME_EUKARYOTIC_TRANSLATION_INITIATION	REACTOME_EUKARYOTIC_TRANSLATION_INITIATION	Details ...	108	-0.528251	-2.35799	0	0	0	2433	tags=56%, list=28%, signal=77%
REACTOME_REGULATION_OF_CHOLESTEROL_BIOSYNTHESIS_BY_SREBP_SREBF	REACTOME_REGULATION_OF_CHOLESTEROL_BIOSYNTHESIS_BY_SREBP_SREBF	Details ...	44	-0.622973	-2.31936	0	0	0	1224	tags=45%, list=14%, signal=53%
REACTOME_REGULATION_OF_EXPRESSION_OF_SLITS_AND_ROBOS	REACTOME_REGULATION_OF_EXPRESSION_OF_SLITS_AND_ROBOS	Details ...	143	-0.491851	-2.30586	0	0	0	3261	tags=63%, list=38%, signal=100%
REACTOME_NONSENSE_MEDIATED_DECAY_NMD	REACTOME_NONSENSE_MEDIATED_DECAY_NMD	Details ...	103	-0.530228	-2.28039	0	0	0	3261	tags=74%, list=38%, signal=118%
REACTOME_DNA_STRAND_ELONGATION	REACTOME_DNA_STRAND_ELONGATION	Details ...	30	-0.666657	-2.2454	0	0.000130194	0.001	1553	tags=70%, list=18%, signal=85%
REACTOME_RESPONSE_OF_EIF2AK4_GCN2_TO_AMINO_ACID_DEFICIENCY	REACTOME_RESPONSE_OF_EIF2AK4_GCN2_TO_AMINO_ACID_DEFICIENCY	Details ...	86	-0.526504	-2.24338	0	0.000118358	0.001	3261	tags=76%, list=38%, signal=121%
REACTOME_AUF1_HNRNP_D0_BINDS_AND_DESTABILIZES_MRNA	REACTOME_AUF1_HNRNP_D0_BINDS_AND_DESTABILIZES_MRNA	Details ...	49	-0.589403	-2.23644	0	0.000108495	0.001	465	tags=16%, list=5%, signal=17%
REACTOME_SELENOAMINO_ACID_METABOLISM	REACTOME_SELENOAMINO_ACID_METABOLISM	Details ...	106	-0.498236	-2.21194	0	0.000100149	0.001	2251	tags=54%, list=26%, signal=72%
REACTOME_EPIGENETIC_REGULATION_OF_GENE_EXPRESSION	REACTOME_EPIGENETIC_REGULATION_OF_GENE_EXPRESSION	Details ...	76	-0.52159	-2.17423	0	0.000478759	0.005	2303	tags=51%, list=27%, signal=70%
REACTOME_ERCC6_CSB_AND_EHMT2_G9A_POSITIVELY_REGULATE_RRNA_EXPRESSION	REACTOME_ERCC6_CSB_AND_EHMT2_G9A_POSITIVELY_REGULATE_RRNA_EXPRESSION	Details ...	21	-0.691091	-2.16893	0	0.000529516	0.006	2303	tags=71%, list=27%, signal=97%
REACTOME_METABOLISM_OF_POLYAMINES	REACTOME_METABOLISM_OF_POLYAMINES	Details ...	47	-0.559066	-2.14832	0	0.000496421	0.006	465	tags=15%, list=5%, signal=16%
REACTOME_CITRIC_ACID_CYCLE_TCA_CYCLE	REACTOME_CITRIC_ACID_CYCLE_TCA_CYCLE	Details ...	21	-0.678911	-2.14426	0	0.000545319	0.007	1559	tags=71%, list=18%, signal=87%
REACTOME_DNA_REPLICATION_PRE_INITIATION	REACTOME_DNA_REPLICATION_PRE_INITIATION	Details ...	64	-0.529919	-2.14014	0	0.000587153	0.008	1363	tags=33%, list=16%, signal=39%
REACTOME_POSITIVE_EPIGENETIC_REGULATION_OF_RRNA_EXPRESSION	REACTOME_POSITIVE_EPIGENETIC_REGULATION_OF_RRNA_EXPRESSION	Details ...	46	-0.558808	-2.11129	0	0.000685643	0.01	2425	tags=57%, list=28%, signal=78%
REACTOME_DNA_REPLICATION	REACTOME_DNA_REPLICATION	Details ...	96	-0.489576	-2.10381	0	0.000716821	0.011	1637	tags=33%, list=19%, signal=41%
REACTOME_BASE_EXCISION_REPAIR	REACTOME_BASE_EXCISION_REPAIR		41	-0.568284	-2.09356	0	0.00100822	0.016	1553	tags=54%, list=18%, signal=65%
REACTOME_TELOMERE_MAINTENANCE	REACTOME_TELOMERE_MAINTENANCE		58	-0.499991	-1.98155	0	0.00656821	0.103	1553	tags=43%, list=18%, signal=52%
REACTOME_CHROMOSOME_MAINTENANCE	REACTOME_CHROMOSOME_MAINTENANCE		65	-0.491423	-1.98077	0	0.00639104	0.105	1642	tags=45%, list=19%, signal=55%
REACTOME_COOPERATION_OF_PDCL_PHLP1_AND_TRIC_CCT_IN_G_PROTEIN_BETA_FOLDING	REACTOME_COOPERATION_OF_PDCL_PHLP1_AND_TRIC_CCT_IN_G_PROTEIN_BETA_FOLDING		26	-0.606839	-1.97849	0.00212766	0.00629591	0.108	2314	tags=62%, list=27%, signal=84%
REACTOME_HDACS_DEACETYLATE_HISTONES	REACTOME_HDACS_DEACETYLATE_HISTONES		36	-0.556665	-1.9489	0	0.00845105	0.149	2093	tags=56%, list=24%, signal=73%
REACTOME_G2_M_CHECKPOINTS	REACTOME_G2_M_CHECKPOINTS		96	-0.444717	-1.94439	0	0.00853713	0.156	2219	tags=38%, list=26%, signal=50%
REACTOME_LAGGING_STRAND_SYNTHESIS	REACTOME_LAGGING_STRAND_SYNTHESIS		20	-0.624084	-1.93528	0.00219298	0.00953692	0.177	1553	tags=65%, list=18%, signal=79%
REACTOME_HEDGEHOG_LIGAND_BIOGENESIS	REACTOME_HEDGEHOG_LIGAND_BIOGENESIS		51	-0.504416	-1.93379	0	0.0094332	0.179	465	tags=12%, list=5%, signal=12%
REACTOME_TELOMERE_C_STRAND_LAGGING_STRAND_SYNTHESIS	REACTOME_TELOMERE_C_STRAND_LAGGING_STRAND_SYNTHESIS		29	-0.580633	-1.92701	0	0.00970024	0.191	1553	tags=55%, list=18%, signal=67%
REACTOME_STABILIZATION_OF_P53	REACTOME_STABILIZATION_OF_P53		47	-0.505286	-1.92508	0	0.00964045	0.197	465	tags=13%, list=5%, signal=13%
REACTOME_SIGNALING_BY_ROBO_RECEPTORS	REACTOME_SIGNALING_BY_ROBO_RECEPTORS		180	-0.397114	-1.91931	0	0.00991578	0.208	3261	tags=57%, list=38%, signal=90%
REACTOME_EXTENSION_OF_TELOMERES	REACTOME_EXTENSION_OF_TELOMERES		40	-0.51971	-1.90691	0	0.0108492	0.229	1553	tags=48%, list=18%, signal=58%
REACTOME_REGULATION_OF_MRNA_STABILITY_BY_PROTEINS_THAT_BIND_AU_RICH_ELEMENTS	REACTOME_REGULATION_OF_MRNA_STABILITY_BY_PROTEINS_THAT_BIND_AU_RICH_ELEMENTS		79	-0.451373	-1.90456	0	0.0110356	0.24	3295	tags=49%, list=38%, signal=79%
REACTOME_UCH_PROTEINASES	REACTOME_UCH_PROTEINASES		71	-0.465899	-1.89707	0	0.0113959	0.252	1177	tags=23%, list=14%, signal=26%
REACTOME_S_PHASE	REACTOME_S_PHASE		121	-0.429058	-1.89498	0	0.0112553	0.256	1637	tags=30%, list=19%, signal=36%
REACTOME_ASSEMBLY_OF_THE_PRE_REPLICATIVE_COMPLEX	REACTOME_ASSEMBLY_OF_THE_PRE_REPLICATIVE_COMPLEX		54	-0.484781	-1.89396	0	0.0111229	0.259	1363	tags=26%, list=16%, signal=31%
REACTOME_DEGRADATION_OF_AXIN	REACTOME_DEGRADATION_OF_AXIN		46	-0.502595	-1.88632	0	0.0118914	0.277	465	tags=13%, list=5%, signal=14%
REACTOME_RNA_POLYMERASE_I_TRANSCRIPTION	REACTOME_RNA_POLYMERASE_I_TRANSCRIPTION		47	-0.493706	-1.88111	0.00225225	0.0123776	0.296	2039	tags=45%, list=24%, signal=58%
REACTOME_THE_ROLE_OF_GTSE1_IN_G2_M_PROGRESSION_AFTER_G2_CHECKPOINT	REACTOME_THE_ROLE_OF_GTSE1_IN_G2_M_PROGRESSION_AFTER_G2_CHECKPOINT		60	-0.471219	-1.87555	0	0.0130011	0.317	1613	tags=23%, list=19%, signal=29%
REACTOME_MEIOTIC_RECOMBINATION	REACTOME_MEIOTIC_RECOMBINATION		18	-0.634955	-1.87317	0.00218818	0.0129414	0.322	1449	tags=50%, list=17%, signal=60%
REACTOME_G1_S_DNA_DAMAGE_CHECKPOINTS	REACTOME_G1_S_DNA_DAMAGE_CHECKPOINTS		49	-0.475883	-1.86292	0	0.0147324	0.362	465	tags=12%, list=5%, signal=13%
REACTOME_ORC1_REMOVAL_FROM_CHROMATIN	REACTOME_ORC1_REMOVAL_FROM_CHROMATIN		58	-0.46141	-1.85626	0.00226244	0.0155392	0.382	1363	tags=24%, list=16%, signal=29%
REACTOME_NEGATIVE_REGULATION_OF_NOTCH4_SIGNALING	REACTOME_NEGATIVE_REGULATION_OF_NOTCH4_SIGNALING		48	-0.487198	-1.85377	0.00213675	0.0155758	0.394	284	tags=10%, list=3%, signal=11%
REACTOME_APC_C_CDH1_MEDIATED_DEGRADATION_OF_CDC20_AND_OTHER_APC_C_CDH1_TARGETED_PROTEINS_IN_LATE_MITOSIS_EARLY_G1	REACTOME_APC_C_CDH1_MEDIATED_DEGRADATION_OF_CDC20_AND_OTHER_APC_C_CDH1_TARGETED_PROTEINS_IN_LATE_MITOSIS_EARLY_G1		58	-0.474055	-1.85318	0	0.0153714	0.396	1044	tags=16%, list=12%, signal=18%
REACTOME_DECTIN_1_MEDIATED_NONCANONICAL_NF_KB_SIGNALING	REACTOME_DECTIN_1_MEDIATED_NONCANONICAL_NF_KB_SIGNALING		52	-0.480707	-1.85136	0.00214133	0.0152687	0.404	465	tags=12%, list=5%, signal=12%
REACTOME_RMTS_METHYLATE_HISTONE_ARGININES	REACTOME_RMTS_METHYLATE_HISTONE_ARGININES		34	-0.524561	-1.84445	0	0.016112	0.427	2090	tags=53%, list=24%, signal=70%
REACTOME_TRANSLATION	REACTOME_TRANSLATION		266	-0.365521	-1.84206	0	0.016286	0.438	2600	tags=43%, list=30%, signal=60%
REACTOME_ACTIVATION_OF_THE_PRE_REPLICATIVE_COMPLEX	REACTOME_ACTIVATION_OF_THE_PRE_REPLICATIVE_COMPLEX		21	-0.588051	-1.84134	0.00207469	0.0160845	0.439	1363	tags=67%, list=16%, signal=79%
REACTOME_DEGRADATION_OF_DVL	REACTOME_DEGRADATION_OF_DVL		47	-0.485299	-1.83452	0	0.0170736	0.458	465	tags=13%, list=5%, signal=13%
REACTOME_CARDIAC_CONDUCTION	REACTOME_CARDIAC_CONDUCTION		43	-0.500858	-1.83221	0	0.0171531	0.468	2363	tags=51%, list=28%, signal=70%
REACTOME_CYTOPROTECTION_BY_HMOX1	REACTOME_CYTOPROTECTION_BY_HMOX1		103	-0.410056	-1.83114	0	0.0169483	0.472	1224	tags=22%, list=14%, signal=26%
REACTOME_METABOLISM_OF_COFACTORS	REACTOME_METABOLISM_OF_COFACTORS		17	-0.623904	-1.82925	0	0.0170718	0.479	1699	tags=59%, list=20%, signal=73%
REACTOME_REGULATION_OF_RAS_BY_GAPS	REACTOME_REGULATION_OF_RAS_BY_GAPS		57	-0.466769	-1.82577	0	0.017449	0.492	519	tags=14%, list=6%, signal=15%
REACTOME_RUNX1_REGULATES_TRANSCRIPTION_OF_GENES_INVOLVED_IN_DIFFERENTIATION_OF_HSCS	REACTOME_RUNX1_REGULATES_TRANSCRIPTION_OF_GENES_INVOLVED_IN_DIFFERENTIATION_OF_HSCS		59	-0.464159	-1.82331	0	0.0175666	0.499	1217	tags=20%, list=14%, signal=24%
REACTOME_ASYMMETRIC_LOCALIZATION_OF_PCP_PROTEINS	REACTOME_ASYMMETRIC_LOCALIZATION_OF_PCP_PROTEINS		48	-0.480963	-1.82038	0.0043573	0.0177708	0.509	465	tags=13%, list=5%, signal=13%
REACTOME_ACTIVATION_OF_THE_MRNA_UPON_BINDING_OF_THE_CAP_BINDING_COMPLEX_AND_EIFS_AND_SUBSEQUENT_BINDING_TO_43S	REACTOME_ACTIVATION_OF_THE_MRNA_UPON_BINDING_OF_THE_CAP_BINDING_COMPLEX_AND_EIFS_AND_SUBSEQUENT_BINDING_TO_43S		56	-0.45753	-1.81877	0	0.0176881	0.513	2433	tags=45%, list=28%, signal=62%
REACTOME_DEGRADATION_OF_GLI1_BY_THE_PROTEASOME	REACTOME_DEGRADATION_OF_GLI1_BY_THE_PROTEASOME		51	-0.470403	-1.81723	0	0.0177231	0.518	465	tags=12%, list=5%, signal=12%
REACTOME_RESOLUTION_OF_AP_SITES_VIA_THE_MULTIPLE_NUCLEOTIDE_PATCH_REPLACEMENT_PATHWAY	REACTOME_RESOLUTION_OF_AP_SITES_VIA_THE_MULTIPLE_NUCLEOTIDE_PATCH_REPLACEMENT_PATHWAY		23	-0.569038	-1.81496	0	0.0176916	0.524	1553	tags=52%, list=18%, signal=64%
REACTOME_POLYMERASE_SWITCHING_ON_THE_C_STRAND_OF_THE_TELOMERE	REACTOME_POLYMERASE_SWITCHING_ON_THE_C_STRAND_OF_THE_TELOMERE		23	-0.571545	-1.806	0.00399202	0.0189474	0.551	1553	tags=57%, list=18%, signal=69%
REACTOME_CHROMATIN_MODIFYING_ENZYMES	REACTOME_CHROMATIN_MODIFYING_ENZYMES		172	-0.376658	-1.79838	0	0.019946	0.58	2517	tags=47%, list=29%, signal=65%
REACTOME_HSF1_ACTIVATION	REACTOME_HSF1_ACTIVATION		20	-0.58344	-1.79787	0.00210084	0.0197263	0.58	1301	tags=45%, list=15%, signal=53%
REACTOME_TCR_SIGNALING	REACTOME_TCR_SIGNALING		94	-0.420888	-1.79641	0	0.0195999	0.584	540	tags=12%, list=6%, signal=12%
REACTOME_INFLUENZA_INFECTION	REACTOME_INFLUENZA_INFECTION		142	-0.391356	-1.7947	0	0.0197466	0.591	2125	tags=39%, list=25%, signal=52%
REACTOME_SCF_SKP2_MEDIATED_DEGRADATION_OF_P27_P21	REACTOME_SCF_SKP2_MEDIATED_DEGRADATION_OF_P27_P21		49	-0.466629	-1.78348	0.0043956	0.0218713	0.636	284	tags=10%, list=3%, signal=10%
REACTOME_CROSS_PRESENTATION_OF_SOLUBLE_EXOGENOUS_ANTIGENS_ENDOSOMES	REACTOME_CROSS_PRESENTATION_OF_SOLUBLE_EXOGENOUS_ANTIGENS_ENDOSOMES		45	-0.481702	-1.78307	0	0.021554	0.637	465	tags=13%, list=5%, signal=14%
REACTOME_PCNA_DEPENDENT_LONG_PATCH_BASE_EXCISION_REPAIR	REACTOME_PCNA_DEPENDENT_LONG_PATCH_BASE_EXCISION_REPAIR		19	-0.581837	-1.78305	0.00441501	0.0212486	0.638	1553	tags=58%, list=18%, signal=71%
REACTOME_SRP_DEPENDENT_COTRANSLATIONAL_PROTEIN_TARGETING_TO_MEMBRANE	REACTOME_SRP_DEPENDENT_COTRANSLATIONAL_PROTEIN_TARGETING_TO_MEMBRANE		101	-0.406814	-1.78228	0.00242718	0.0210677	0.639	2433	tags=52%, list=28%, signal=72%
REACTOME_PROCESSIVE_SYNTHESIS_ON_THE_LAGGING_STRAND	REACTOME_PROCESSIVE_SYNTHESIS_ON_THE_LAGGING_STRAND		15	-0.618279	-1.76818	0.00854701	0.0240686	0.687	1282	tags=60%, list=15%, signal=70%
REACTOME_NEGATIVE_EPIGENETIC_REGULATION_OF_RRNA_EXPRESSION	REACTOME_NEGATIVE_EPIGENETIC_REGULATION_OF_RRNA_EXPRESSION		47	-0.474692	-1.76365	0	0.0247939	0.705	1686	tags=40%, list=20%, signal=50%
REACTOME_ATTENUATION_PHASE	REACTOME_ATTENUATION_PHASE		17	-0.608862	-1.76329	0.0142276	0.0245326	0.707	796	tags=41%, list=9%, signal=45%
REACTOME_METABOLISM_OF_STEROIDS	REACTOME_METABOLISM_OF_STEROIDS		100	-0.403272	-1.76187	0.00249377	0.0245021	0.71	1247	tags=28%, list=15%, signal=32%
REACTOME_B_WICH_COMPLEX_POSITIVELY_REGULATES_RRNA_EXPRESSION	REACTOME_B_WICH_COMPLEX_POSITIVELY_REGULATES_RRNA_EXPRESSION		31	-0.511065	-1.75769	0.00214592	0.0254422	0.729	1895	tags=45%, list=22%, signal=58%
REACTOME_PYRUVATE_METABOLISM_AND_CITRIC_ACID_TCA_CYCLE	REACTOME_PYRUVATE_METABOLISM_AND_CITRIC_ACID_TCA_CYCLE		48	-0.463467	-1.75666	0.00223214	0.0253784	0.736	1389	tags=42%, list=16%, signal=49%
REACTOME_METABOLISM_OF_AMINO_ACIDS_AND_DERIVATIVES	REACTOME_METABOLISM_OF_AMINO_ACIDS_AND_DERIVATIVES		301	-0.345121	-1.7437	0	0.0282142	0.784	2130	tags=31%, list=25%, signal=40%
REACTOME_REGULATION_OF_TP53_ACTIVITY	REACTOME_REGULATION_OF_TP53_ACTIVITY		104	-0.396248	-1.74248	0	0.0281869	0.785	2558	tags=48%, list=30%, signal=68%
REACTOME_MITOTIC_G1_PHASE_AND_G1_S_TRANSITION	REACTOME_MITOTIC_G1_PHASE_AND_G1_S_TRANSITION		102	-0.398162	-1.74187	0	0.0280056	0.787	1994	tags=32%, list=23%, signal=42%
REACTOME_TRANSCRIPTIONAL_REGULATION_BY_E2F6	REACTOME_TRANSCRIPTIONAL_REGULATION_BY_E2F6		20	-0.569033	-1.73801	0.0104167	0.0284632	0.797	1325	tags=40%, list=15%, signal=47%
REACTOME_RESOLUTION_OF_ABASIC_SITES_AP_SITES	REACTOME_RESOLUTION_OF_ABASIC_SITES_AP_SITES		31	-0.506506	-1.73786	0.00225734	0.0281319	0.798	1553	tags=45%, list=18%, signal=55%
REACTOME_APC_C_MEDIATED_DEGRADATION_OF_CELL_CYCLE_PROTEINS	REACTOME_APC_C_MEDIATED_DEGRADATION_OF_CELL_CYCLE_PROTEINS		64	-0.43514	-1.73087	0.00226757	0.0296646	0.817	2219	tags=25%, list=26%, signal=33%
REACTOME_ACTIVATION_OF_ANTERIOR_HOX_GENES_IN_HINDBRAIN_DEVELOPMENT_DURING_EARLY_EMBRYOGENESIS	REACTOME_ACTIVATION_OF_ANTERIOR_HOX_GENES_IN_HINDBRAIN_DEVELOPMENT_DURING_EARLY_EMBRYOGENESIS		47	-0.453458	-1.727	0	0.0304348	0.826	2075	tags=43%, list=24%, signal=56%
REACTOME_HSP90_CHAPERONE_CYCLE_FOR_STEROID_HORMONE_RECEPTORS_SHR	REACTOME_HSP90_CHAPERONE_CYCLE_FOR_STEROID_HORMONE_RECEPTORS_SHR		44	-0.460624	-1.72612	0.00921659	0.0303361	0.829	1708	tags=32%, list=20%, signal=40%
REACTOME_TRANSCRIPTIONAL_REGULATION_BY_TP53	REACTOME_TRANSCRIPTIONAL_REGULATION_BY_TP53		248	-0.348599	-1.72581	0	0.0300154	0.83	1912	tags=33%, list=22%, signal=42%
REACTOME_REGULATION_OF_RUNX2_EXPRESSION_AND_ACTIVITY	REACTOME_REGULATION_OF_RUNX2_EXPRESSION_AND_ACTIVITY		55	-0.431772	-1.72224	0	0.0305669	0.84	1044	tags=15%, list=12%, signal=16%
REACTOME_POTENTIAL_THERAPEUTICS_FOR_SARS	REACTOME_POTENTIAL_THERAPEUTICS_FOR_SARS		67	-0.42054	-1.72161	0	0.030358	0.843	2135	tags=45%, list=25%, signal=59%
REACTOME_THE_CITRIC_ACID_TCA_CYCLE_AND_RESPIRATORY_ELECTRON_TRANSPORT	REACTOME_THE_CITRIC_ACID_TCA_CYCLE_AND_RESPIRATORY_ELECTRON_TRANSPORT		143	-0.374399	-1.71957	0	0.030542	0.847	1769	tags=31%, list=21%, signal=39%
REACTOME_SWITCHING_OF_ORIGINS_TO_A_POST_REPLICATIVE_STATE	REACTOME_SWITCHING_OF_ORIGINS_TO_A_POST_REPLICATIVE_STATE		71	-0.411971	-1.71566	0	0.0311018	0.856	2087	tags=27%, list=24%, signal=35%
REACTOME_REGULATION_OF_RUNX3_EXPRESSION_AND_ACTIVITY	REACTOME_REGULATION_OF_RUNX3_EXPRESSION_AND_ACTIVITY		48	-0.449002	-1.71258	0.00452489	0.0318543	0.866	284	tags=10%, list=3%, signal=11%
REACTOME_FORMATION_OF_TUBULIN_FOLDING_INTERMEDIATES_BY_CCT_TRIC	REACTOME_FORMATION_OF_TUBULIN_FOLDING_INTERMEDIATES_BY_CCT_TRIC		20	-0.553062	-1.70051	0.0127932	0.0352031	0.896	1512	tags=50%, list=18%, signal=61%
REACTOME_DOWNSTREAM_SIGNALING_EVENTS_OF_B_CELL_RECEPTOR_BCR	REACTOME_DOWNSTREAM_SIGNALING_EVENTS_OF_B_CELL_RECEPTOR_BCR		71	-0.413863	-1.69489	0	0.0363784	0.903	2219	tags=27%, list=26%, signal=36%
REACTOME_CLEC7A_DECTIN_1_SIGNALING	REACTOME_CLEC7A_DECTIN_1_SIGNALING		85	-0.402763	-1.69399	0.00232019	0.0361965	0.905	1619	tags=20%, list=19%, signal=24%
REACTOME_MRNA_SPLICING	REACTOME_MRNA_SPLICING		177	-0.35698	-1.69277	0	0.0361452	0.907	3330	tags=50%, list=39%, signal=80%
REACTOME_G2_M_DNA_DAMAGE_CHECKPOINT	REACTOME_G2_M_DNA_DAMAGE_CHECKPOINT		42	-0.456453	-1.69228	0	0.0359233	0.909	2962	tags=57%, list=35%, signal=87%
REACTOME_DEFECTIVE_CFTR_CAUSES_CYSTIC_FIBROSIS	REACTOME_DEFECTIVE_CFTR_CAUSES_CYSTIC_FIBROSIS		53	-0.432652	-1.68878	0.0110619	0.0366095	0.916	465	tags=11%, list=5%, signal=12%
REACTOME_ION_HOMEOSTASIS	REACTOME_ION_HOMEOSTASIS		32	-0.48079	-1.68841	0.0103306	0.0364286	0.92	2363	tags=50%, list=28%, signal=69%
REACTOME_ACTIVATION_OF_KAINATE_RECEPTORS_UPON_GLUTAMATE_BINDING	REACTOME_ACTIVATION_OF_KAINATE_RECEPTORS_UPON_GLUTAMATE_BINDING		18	-0.571194	-1.68136	0.00652174	0.0381393	0.938	2148	tags=44%, list=25%, signal=59%
REACTOME_TELOMERE_EXTENSION_BY_TELOMERASE	REACTOME_TELOMERE_EXTENSION_BY_TELOMERASE		16	-0.575436	-1.66038	0.0188679	0.0450359	0.957	2717	tags=75%, list=32%, signal=110%
REACTOME_OXIDATIVE_STRESS_INDUCED_SENESCENCE	REACTOME_OXIDATIVE_STRESS_INDUCED_SENESCENCE		49	-0.431375	-1.64829	0.00231481	0.0495365	0.969	1502	tags=41%, list=18%, signal=49%
REACTOME_INTERACTION_BETWEEN_L1_AND_ANKYRINS	REACTOME_INTERACTION_BETWEEN_L1_AND_ANKYRINS		15	-0.580371	-1.64512	0.0278373	0.0504003	0.971	2549	tags=73%, list=30%, signal=104%
REACTOME_BASE_EXCISION_REPAIR_AP_SITE_FORMATION	REACTOME_BASE_EXCISION_REPAIR_AP_SITE_FORMATION		15	-0.577031	-1.63923	0.0165975	0.0524115	0.976	1469	tags=60%, list=17%, signal=72%
REACTOME_G1_S_SPECIFIC_TRANSCRIPTION	REACTOME_G1_S_SPECIFIC_TRANSCRIPTION		15	-0.57769	-1.63798	0.0248963	0.0525317	0.976	3079	tags=87%, list=36%, signal=135%
REACTOME_RNA_POLYMERASE_II_TRANSCRIPTION_TERMINATION	REACTOME_RNA_POLYMERASE_II_TRANSCRIPTION_TERMINATION		60	-0.41487	-1.63705	0.00448431	0.0524017	0.977	3899	tags=65%, list=46%, signal=118%
REACTOME_MITOCHONDRIAL_TRANSLATION	REACTOME_MITOCHONDRIAL_TRANSLATION		82	-0.385903	-1.62928	0.00485437	0.054761	0.982	3856	tags=60%, list=45%, signal=108%
REACTOME_REGULATION_OF_PTEN_STABILITY_AND_ACTIVITY	REACTOME_REGULATION_OF_PTEN_STABILITY_AND_ACTIVITY		60	-0.410292	-1.61359	0.00675676	0.0615229	0.989	465	tags=12%, list=5%, signal=12%
REACTOME_CELL_CYCLE_CHECKPOINTS	REACTOME_CELL_CYCLE_CHECKPOINTS		169	-0.339885	-1.6088	0	0.0629915	0.993	2219	tags=34%, list=26%, signal=45%
REACTOME_GENERATION_OF_SECOND_MESSENGER_MOLECULES	REACTOME_GENERATION_OF_SECOND_MESSENGER_MOLECULES		20	-0.528256	-1.60557	0.0277778	0.0638446	0.994	540	tags=20%, list=6%, signal=21%
REACTOME_UPTAKE_AND_ACTIONS_OF_BACTERIAL_TOXINS	REACTOME_UPTAKE_AND_ACTIONS_OF_BACTERIAL_TOXINS		21	-0.511799	-1.60512	0.0105485	0.0635127	0.994	2175	tags=62%, list=25%, signal=83%
REACTOME_ACTIVATION_OF_ATR_IN_RESPONSE_TO_REPLICATION_STRESS	REACTOME_ACTIVATION_OF_ATR_IN_RESPONSE_TO_REPLICATION_STRESS		21	-0.521418	-1.59804	0.022449	0.0664049	0.997	2558	tags=76%, list=30%, signal=108%
REACTOME_TNFR2_NON_CANONICAL_NF_KB_PATHWAY	REACTOME_TNFR2_NON_CANONICAL_NF_KB_PATHWAY		59	-0.401705	-1.59031	0.0191847	0.0703033	0.998	465	tags=12%, list=5%, signal=12%
REACTOME_SYNTHESIS_OF_SUBSTRATES_IN_N_GLYCAN_BIOSYTHESIS	REACTOME_SYNTHESIS_OF_SUBSTRATES_IN_N_GLYCAN_BIOSYTHESIS		43	-0.422014	-1.58975	0.0151188	0.069981	0.998	495	tags=30%, list=6%, signal=32%
REACTOME_TRNA_MODIFICATION_IN_THE_NUCLEUS_AND_CYTOSOL	REACTOME_TRNA_MODIFICATION_IN_THE_NUCLEUS_AND_CYTOSOL		34	-0.446793	-1.58761	0.0109409	0.0706525	0.998	1468	tags=32%, list=17%, signal=39%
REACTOME_FORMATION_OF_THE_BETA_CATENIN_TCF_TRANSACTIVATING_COMPLEX	REACTOME_FORMATION_OF_THE_BETA_CATENIN_TCF_TRANSACTIVATING_COMPLEX		27	-0.473439	-1.57733	0.0131004	0.075549	0.999	3355	tags=74%, list=39%, signal=121%
REACTOME_INHIBITION_OF_DNA_RECOMBINATION_AT_TELOMERE	REACTOME_INHIBITION_OF_DNA_RECOMBINATION_AT_TELOMERE		23	-0.495956	-1.57712	0.0194805	0.0750407	0.999	1469	tags=39%, list=17%, signal=47%
REACTOME_FCERI_MEDIATED_NF_KB_ACTIVATION	REACTOME_FCERI_MEDIATED_NF_KB_ACTIVATION		69	-0.381304	-1.57692	0.00675676	0.0745202	0.999	465	tags=10%, list=5%, signal=11%
REACTOME_CELLULAR_RESPONSE_TO_HYPOXIA	REACTOME_CELLULAR_RESPONSE_TO_HYPOXIA		58	-0.389267	-1.57273	0.0110132	0.0760634	0.999	465	tags=12%, list=5%, signal=13%
REACTOME_ADRENALINE_NORADRENALINE_INHIBITS_INSULIN_SECRETION	REACTOME_ADRENALINE_NORADRENALINE_INHIBITS_INSULIN_SECRETION		17	-0.529361	-1.55099	0.0230126	0.0888306	0.999	3210	tags=59%, list=37%, signal=94%
REACTOME_REGULATION_OF_HMOX1_EXPRESSION_AND_ACTIVITY	REACTOME_REGULATION_OF_HMOX1_EXPRESSION_AND_ACTIVITY		55	-0.39503	-1.54821	0.0168776	0.0894901	0.999	465	tags=11%, list=5%, signal=11%
REACTOME_RHO_GTPASES_ACTIVATE_PKNS	REACTOME_RHO_GTPASES_ACTIVATE_PKNS		33	-0.442579	-1.54762	0.0149893	0.0890488	0.999	2163	tags=45%, list=25%, signal=61%
REACTOME_REGULATION_OF_TP53_ACTIVITY_THROUGH_PHOSPHORYLATION	REACTOME_REGULATION_OF_TP53_ACTIVITY_THROUGH_PHOSPHORYLATION		53	-0.403195	-1.54394	0.0162791	0.0909951	0.999	2558	tags=49%, list=30%, signal=70%
REACTOME_C_TYPE_LECTIN_RECEPTORS_CLRS	REACTOME_C_TYPE_LECTIN_RECEPTORS_CLRS		110	-0.346132	-1.53505	0.00243309	0.0962209	0.999	1619	tags=21%, list=19%, signal=25%
REACTOME_MRNA_SPLICING_MINOR_PATHWAY	REACTOME_MRNA_SPLICING_MINOR_PATHWAY		47	-0.405636	-1.53131	0.010846	0.097964	0.999	3141	tags=53%, list=37%, signal=84%
REACTOME_OPIOID_SIGNALLING	REACTOME_OPIOID_SIGNALLING		64	-0.378871	-1.52938	0.00672646	0.0985137	0.999	2261	tags=41%, list=26%, signal=55%
REACTOME_GAP_FILLING_DNA_REPAIR_SYNTHESIS_AND_LIGATION_IN_GG_NER	REACTOME_GAP_FILLING_DNA_REPAIR_SYNTHESIS_AND_LIGATION_IN_GG_NER		20	-0.493933	-1.52236	0.0274262	0.102652	0.999	1553	tags=50%, list=18%, signal=61%
REACTOME_CYCLIN_A_CDK2_ASSOCIATED_EVENTS_AT_S_PHASE_ENTRY	REACTOME_CYCLIN_A_CDK2_ASSOCIATED_EVENTS_AT_S_PHASE_ENTRY		61	-0.377397	-1.52106	0.0111111	0.102723	0.999	777	tags=11%, list=9%, signal=13%
REACTOME_CELLULAR_RESPONSE_TO_CHEMICAL_STRESS	REACTOME_CELLULAR_RESPONSE_TO_CHEMICAL_STRESS		133	-0.328361	-1.51585	0	0.105735	0.999	1224	tags=20%, list=14%, signal=22%
REACTOME_NEGATIVE_REGULATION_OF_MAPK_PATHWAY	REACTOME_NEGATIVE_REGULATION_OF_MAPK_PATHWAY		30	-0.438645	-1.51288	0.0416667	0.10724	1	2902	tags=57%, list=34%, signal=85%
REACTOME_MUSCLE_CONTRACTION	REACTOME_MUSCLE_CONTRACTION		89	-0.352759	-1.50782	0.00731707	0.110022	1	2363	tags=45%, list=28%, signal=61%
REACTOME_RNA_POLYMERASE_I_TRANSCRIPTION_INITIATION	REACTOME_RNA_POLYMERASE_I_TRANSCRIPTION_INITIATION		37	-0.425543	-1.5056	0.039823	0.110981	1	2425	tags=43%, list=28%, signal=60%
REACTOME_COOPERATION_OF_PREFOLDIN_AND_TRIC_CCT_IN_ACTIN_AND_TUBULIN_FOLDING	REACTOME_COOPERATION_OF_PREFOLDIN_AND_TRIC_CCT_IN_ACTIN_AND_TUBULIN_FOLDING		27	-0.460452	-1.49923	0.0341151	0.114934	1	1512	tags=41%, list=18%, signal=49%
REACTOME_PROCESSING_OF_DNA_DOUBLE_STRAND_BREAK_ENDS	REACTOME_PROCESSING_OF_DNA_DOUBLE_STRAND_BREAK_ENDS		40	-0.401461	-1.49486	0.0185615	0.117601	1	2962	tags=52%, list=35%, signal=80%
REACTOME_HSF1_DEPENDENT_TRANSACTIVATION	REACTOME_HSF1_DEPENDENT_TRANSACTIVATION		26	-0.462686	-1.49187	0.0506329	0.11927	1	1492	tags=38%, list=17%, signal=46%
REACTOME_MEIOSIS	REACTOME_MEIOSIS		38	-0.410064	-1.48609	0.0294737	0.123092	1	1604	tags=37%, list=19%, signal=45%
REACTOME_PHASE_II_CONJUGATION_OF_COMPOUNDS	REACTOME_PHASE_II_CONJUGATION_OF_COMPOUNDS		66	-0.364611	-1.47817	0.025463	0.129153	1	1205	tags=27%, list=14%, signal=31%
REACTOME_BIOLOGICAL_OXIDATIONS	REACTOME_BIOLOGICAL_OXIDATIONS		126	-0.320007	-1.4751	0.00936768	0.130885	1	1205	tags=25%, list=14%, signal=28%
REACTOME_TP53_REGULATES_METABOLIC_GENES	REACTOME_TP53_REGULATES_METABOLIC_GENES		70	-0.356052	-1.46919	0.0228833	0.135217	1	826	tags=21%, list=10%, signal=24%
REACTOME_ABC_TRANSPORTER_DISORDERS	REACTOME_ABC_TRANSPORTER_DISORDERS		64	-0.368381	-1.46769	0.0240385	0.135488	1	465	tags=11%, list=5%, signal=11%
REACTOME_PROCESSIVE_SYNTHESIS_ON_THE_C_STRAND_OF_THE_TELOMERE	REACTOME_PROCESSIVE_SYNTHESIS_ON_THE_C_STRAND_OF_THE_TELOMERE		16	-0.509583	-1.46665	0.0673684	0.135388	1	1469	tags=50%, list=17%, signal=60%
REACTOME_TP53_REGULATES_TRANSCRIPTION_OF_CELL_DEATH_GENES	REACTOME_TP53_REGULATES_TRANSCRIPTION_OF_CELL_DEATH_GENES		23	-0.462801	-1.46384	0.0554371	0.136746	1	1780	tags=48%, list=21%, signal=60%
REACTOME_HDR_THROUGH_SINGLE_STRAND_ANNEALING_SSA	REACTOME_HDR_THROUGH_SINGLE_STRAND_ANNEALING_SSA		21	-0.462792	-1.45492	0.0486815	0.144292	1	3402	tags=62%, list=40%, signal=102%
REACTOME_HATS_ACETYLATE_HISTONES	REACTOME_HATS_ACETYLATE_HISTONES		62	-0.364677	-1.44573	0.0275862	0.152124	1	2622	tags=40%, list=31%, signal=58%
REACTOME_RESPIRATORY_ELECTRON_TRANSPORT_ATP_SYNTHESIS_BY_CHEMIOSMOTIC_COUPLING_AND_HEAT_PRODUCTION_BY_UNCOUPLING_PROTEINS	REACTOME_RESPIRATORY_ELECTRON_TRANSPORT_ATP_SYNTHESIS_BY_CHEMIOSMOTIC_COUPLING_AND_HEAT_PRODUCTION_BY_UNCOUPLING_PROTEINS		99	-0.32977	-1.43915	0.0145278	0.157662	1	828	tags=17%, list=10%, signal=19%
REACTOME_ACTIVATION_OF_BH3_ONLY_PROTEINS	REACTOME_ACTIVATION_OF_BH3_ONLY_PROTEINS		20	-0.46522	-1.43335	0.0733753	0.16256	1	1780	tags=50%, list=21%, signal=63%
REACTOME_KSRP_KHSRP_BINDS_AND_DESTABILIZES_MRNA	REACTOME_KSRP_KHSRP_BINDS_AND_DESTABILIZES_MRNA		17	-0.486541	-1.42765	0.0757576	0.167575	1	3254	tags=65%, list=38%, signal=104%
REACTOME_DNA_DAMAGE_TELOMERE_STRESS_INDUCED_SENESCENCE	REACTOME_DNA_DAMAGE_TELOMERE_STRESS_INDUCED_SENESCENCE		31	-0.420578	-1.42721	0.064588	0.166781	1	1910	tags=42%, list=22%, signal=54%
REACTOME_CELL_CYCLE	REACTOME_CELL_CYCLE		433	-0.272007	-1.42387	0	0.169011	1	2005	tags=27%, list=23%, signal=34%
REACTOME_CELLULAR_SENESCENCE	REACTOME_CELLULAR_SENESCENCE		100	-0.326626	-1.42372	0.0246914	0.168002	1	1502	tags=28%, list=18%, signal=34%
REACTOME_TRANSCRIPTIONAL_ACTIVITY_OF_SMAD2_SMAD3_SMAD4_HETEROTRIMER	REACTOME_TRANSCRIPTIONAL_ACTIVITY_OF_SMAD2_SMAD3_SMAD4_HETEROTRIMER		28	-0.429999	-1.42334	0.0656455	0.167264	1	2505	tags=50%, list=29%, signal=70%
REACTOME_UB_SPECIFIC_PROCESSING_PROTEASES	REACTOME_UB_SPECIFIC_PROCESSING_PROTEASES		123	-0.313469	-1.42255	0.0169492	0.1669	1	2435	tags=30%, list=28%, signal=41%
REACTOME_PLATELET_HOMEOSTASIS	REACTOME_PLATELET_HOMEOSTASIS		58	-0.359239	-1.42172	0.0327869	0.166662	1	2667	tags=40%, list=31%, signal=57%
REACTOME_DISEASES_OF_PROGRAMMED_CELL_DEATH	REACTOME_DISEASES_OF_PROGRAMMED_CELL_DEATH		41	-0.386916	-1.42135	0.0545455	0.165915	1	1901	tags=49%, list=22%, signal=62%
REACTOME_RECOGNITION_OF_DNA_DAMAGE_BY_PCNA_CONTAINING_REPLICATION_COMPLEX	REACTOME_RECOGNITION_OF_DNA_DAMAGE_BY_PCNA_CONTAINING_REPLICATION_COMPLEX		24	-0.44513	-1.41776	0.0772627	0.168408	1	1553	tags=46%, list=18%, signal=56%
REACTOME_PCP_CE_PATHWAY	REACTOME_PCP_CE_PATHWAY		69	-0.346811	-1.41759	0.023753	0.167448	1	465	tags=9%, list=5%, signal=9%
REACTOME_SIGNALLING_TO_ERKS	REACTOME_SIGNALLING_TO_ERKS		28	-0.418713	-1.41529	0.0638723	0.16893	1	1499	tags=32%, list=17%, signal=39%
REACTOME_NEUROTRANSMITTER_RELEASE_CYCLE	REACTOME_NEUROTRANSMITTER_RELEASE_CYCLE		25	-0.439047	-1.41491	0.0663812	0.168264	1	1822	tags=40%, list=21%, signal=51%
REACTOME_DOWNREGULATION_OF_SMAD2_3_SMAD4_TRANSCRIPTIONAL_ACTIVITY	REACTOME_DOWNREGULATION_OF_SMAD2_3_SMAD4_TRANSCRIPTIONAL_ACTIVITY		15	-0.492172	-1.4133	0.114108	0.168747	1	2505	tags=60%, list=29%, signal=85%
REACTOME_APOPTOSIS	REACTOME_APOPTOSIS		143	-0.300897	-1.40484	0.015748	0.176791	1	1619	tags=22%, list=19%, signal=27%
REACTOME_POTASSIUM_CHANNELS	REACTOME_POTASSIUM_CHANNELS		17	-0.470504	-1.40132	0.11087	0.179444	1	2230	tags=47%, list=26%, signal=63%
REACTOME_PROGRAMMED_CELL_DEATH	REACTOME_PROGRAMMED_CELL_DEATH		164	-0.296117	-1.39998	0.00257069	0.179874	1	821	tags=16%, list=10%, signal=18%
REACTOME_INOSITOL_PHOSPHATE_METABOLISM	REACTOME_INOSITOL_PHOSPHATE_METABOLISM		35	-0.397066	-1.39842	0.0655022	0.180448	1	2871	tags=43%, list=34%, signal=64%
REACTOME_DEGRADATION_OF_BETA_CATENIN_BY_THE_DESTRUCTION_COMPLEX	REACTOME_DEGRADATION_OF_BETA_CATENIN_BY_THE_DESTRUCTION_COMPLEX		66	-0.346547	-1.39517	0.0472813	0.183081	1	3362	tags=47%, list=39%, signal=77%
REACTOME_INTEGRATION_OF_ENERGY_METABOLISM	REACTOME_INTEGRATION_OF_ENERGY_METABOLISM		70	-0.335874	-1.39455	0.0250569	0.182606	1	2242	tags=40%, list=26%, signal=54%
REACTOME_HIV_ELONGATION_ARREST_AND_RECOVERY	REACTOME_HIV_ELONGATION_ARREST_AND_RECOVERY		29	-0.413225	-1.39218	0.0763723	0.184179	1	1801	tags=31%, list=21%, signal=39%
REACTOME_TRANSMISSION_ACROSS_CHEMICAL_SYNAPSES	REACTOME_TRANSMISSION_ACROSS_CHEMICAL_SYNAPSES		122	-0.308724	-1.38942	0.00963855	0.186212	1	2278	tags=34%, list=27%, signal=45%
REACTOME_SIGNALING_BY_NOTCH4	REACTOME_SIGNALING_BY_NOTCH4		63	-0.346516	-1.38863	0.0394737	0.186061	1	284	tags=8%, list=3%, signal=8%
REACTOME_TRANSLESION_SYNTHESIS_BY_Y_FAMILY_DNA_POLYMERASES_BYPASSES_LESIONS_ON_DNA_TEMPLATE	REACTOME_TRANSLESION_SYNTHESIS_BY_Y_FAMILY_DNA_POLYMERASES_BYPASSES_LESIONS_ON_DNA_TEMPLATE		26	-0.419844	-1.38786	0.0757576	0.185648	1	1553	tags=38%, list=18%, signal=47%
REACTOME_PKMTS_METHYLATE_HISTONE_LYSINES	REACTOME_PKMTS_METHYLATE_HISTONE_LYSINES		38	-0.380477	-1.38642	0.0456621	0.186094	1	2517	tags=50%, list=29%, signal=70%
REACTOME_THROMBOXANE_SIGNALLING_THROUGH_TP_RECEPTOR	REACTOME_THROMBOXANE_SIGNALLING_THROUGH_TP_RECEPTOR		16	-0.472101	-1.38374	0.105376	0.188188	1	2148	tags=44%, list=25%, signal=58%
REACTOME_REGULATION_OF_BETA_CELL_DEVELOPMENT	REACTOME_REGULATION_OF_BETA_CELL_DEVELOPMENT		16	-0.46762	-1.38341	0.106	0.187485	1	1234	tags=38%, list=14%, signal=44%
REACTOME_CELL_CYCLE_MITOTIC	REACTOME_CELL_CYCLE_MITOTIC		359	-0.266612	-1.38197	0	0.188093	1	1994	tags=27%, list=23%, signal=34%
REACTOME_ATF4_ACTIVATES_GENES_IN_RESPONSE_TO_ENDOPLASMIC_RETICULUM_STRESS	REACTOME_ATF4_ACTIVATES_GENES_IN_RESPONSE_TO_ENDOPLASMIC_RETICULUM_STRESS		19	-0.454544	-1.38111	0.109705	0.187965	1	2712	tags=53%, list=32%, signal=77%
REACTOME_RHOBTB2_GTPASE_CYCLE	REACTOME_RHOBTB2_GTPASE_CYCLE		21	-0.442319	-1.37976	0.0775862	0.188437	1	1319	tags=38%, list=15%, signal=45%
REACTOME_FGFR2_ALTERNATIVE_SPLICING	REACTOME_FGFR2_ALTERNATIVE_SPLICING		25	-0.417851	-1.3767	0.0810235	0.190632	1	3006	tags=52%, list=35%, signal=80%
REACTOME_SIGNALING_BY_THE_B_CELL_RECEPTOR_BCR	REACTOME_SIGNALING_BY_THE_B_CELL_RECEPTOR_BCR		99	-0.309435	-1.3695	0.0291971	0.197948	1	1862	tags=22%, list=22%, signal=28%
REACTOME_PROCESSING_OF_CAPPED_INTRONLESS_PRE_MRNA	REACTOME_PROCESSING_OF_CAPPED_INTRONLESS_PRE_MRNA		25	-0.42833	-1.3691	0.0825893	0.197278	1	3855	tags=64%, list=45%, signal=116%
REACTOME_CELLULAR_RESPONSES_TO_EXTERNAL_STIMULI	REACTOME_CELLULAR_RESPONSES_TO_EXTERNAL_STIMULI		487	-0.255781	-1.36806	0	0.197408	1	2265	tags=32%, list=26%, signal=41%
REACTOME_BIOSYNTHESIS_OF_THE_N_GLYCAN_PRECURSOR_DOLICHOL_LIPID_LINKED_OLIGOSACCHARIDE_LLO_AND_TRANSFER_TO_A_NASCENT_PROTEIN	REACTOME_BIOSYNTHESIS_OF_THE_N_GLYCAN_PRECURSOR_DOLICHOL_LIPID_LINKED_OLIGOSACCHARIDE_LLO_AND_TRANSFER_TO_A_NASCENT_PROTEIN		54	-0.349671	-1.3677	0.0526316	0.196741	1	495	tags=24%, list=6%, signal=25%
REACTOME_PROTEIN_FOLDING	REACTOME_PROTEIN_FOLDING		70	-0.334689	-1.36707	0.0387409	0.196423	1	2571	tags=39%, list=30%, signal=55%
REACTOME_FORMATION_OF_THE_CORNIFIED_ENVELOPE	REACTOME_FORMATION_OF_THE_CORNIFIED_ENVELOPE		33	-0.391918	-1.36597	0.0701357	0.196552	1	1825	tags=39%, list=21%, signal=50%
REACTOME_RNA_POLYMERASE_I_PROMOTER_ESCAPE	REACTOME_RNA_POLYMERASE_I_PROMOTER_ESCAPE		29	-0.409105	-1.3647	0.0817204	0.196973	1	1895	tags=34%, list=22%, signal=44%
REACTOME_TRIGLYCERIDE_METABOLISM	REACTOME_TRIGLYCERIDE_METABOLISM		23	-0.434122	-1.36425	0.0767677	0.196417	1	2164	tags=43%, list=25%, signal=58%
REACTOME_SYNTHESIS_OF_IP3_AND_IP4_IN_THE_CYTOSOL	REACTOME_SYNTHESIS_OF_IP3_AND_IP4_IN_THE_CYTOSOL		21	-0.442234	-1.35977	0.105809	0.200587	1	3128	tags=48%, list=37%, signal=75%
REACTOME_TCF_DEPENDENT_SIGNALING_IN_RESPONSE_TO_WNT	REACTOME_TCF_DEPENDENT_SIGNALING_IN_RESPONSE_TO_WNT		112	-0.304328	-1.35345	0.0331126	0.20719	1	2667	tags=38%, list=31%, signal=55%
REACTOME_HOMOLOGOUS_DNA_PAIRING_AND_STRAND_EXCHANGE	REACTOME_HOMOLOGOUS_DNA_PAIRING_AND_STRAND_EXCHANGE		18	-0.454703	-1.3529	0.106904	0.206886	1	3402	tags=61%, list=40%, signal=101%
REACTOME_COSTIMULATION_BY_THE_CD28_FAMILY	REACTOME_COSTIMULATION_BY_THE_CD28_FAMILY		43	-0.363114	-1.35281	0.0809524	0.2058	1	2512	tags=40%, list=29%, signal=56%
REACTOME_HEDGEHOG_ON_STATE	REACTOME_HEDGEHOG_ON_STATE		58	-0.341715	-1.3482	0.0609481	0.21043	1	1332	tags=17%, list=16%, signal=20%
REACTOME_KERATINIZATION	REACTOME_KERATINIZATION		33	-0.391918	-1.34714	0.103448	0.210715	1	1825	tags=39%, list=21%, signal=50%
REACTOME_PERK_REGULATES_GENE_EXPRESSION	REACTOME_PERK_REGULATES_GENE_EXPRESSION		24	-0.411853	-1.34604	0.121535	0.21086	1	3254	tags=58%, list=38%, signal=94%
REACTOME_RUNX1_INTERACTS_WITH_CO_FACTORS_WHOSE_PRECISE_EFFECT_ON_RUNX1_TARGETS_IS_NOT_KNOWN	REACTOME_RUNX1_INTERACTS_WITH_CO_FACTORS_WHOSE_PRECISE_EFFECT_ON_RUNX1_TARGETS_IS_NOT_KNOWN		28	-0.399439	-1.34499	0.0907127	0.211128	1	2078	tags=46%, list=24%, signal=61%
REACTOME_HOMOLOGY_DIRECTED_REPAIR	REACTOME_HOMOLOGY_DIRECTED_REPAIR		57	-0.33485	-1.34189	0.0597701	0.213873	1	2852	tags=46%, list=33%, signal=68%
REACTOME_FATTY_ACID_METABOLISM	REACTOME_FATTY_ACID_METABOLISM		126	-0.300264	-1.34161	0.0498753	0.213084	1	1349	tags=25%, list=16%, signal=30%
REACTOME_SIGNALLING_TO_RAS	REACTOME_SIGNALLING_TO_RAS		15	-0.483787	-1.34016	0.146694	0.213647	1	1426	tags=33%, list=17%, signal=40%
REACTOME_DEFECTS_IN_VITAMIN_AND_COFACTOR_METABOLISM	REACTOME_DEFECTS_IN_VITAMIN_AND_COFACTOR_METABOLISM		16	-0.465202	-1.33543	0.129225	0.218343	1	711	tags=31%, list=8%, signal=34%
REACTOME_PROCESSING_OF_CAPPED_INTRON_CONTAINING_PRE_MRNA	REACTOME_PROCESSING_OF_CAPPED_INTRON_CONTAINING_PRE_MRNA		226	-0.269069	-1.3345	0.0171429	0.218268	1	3330	tags=45%, list=39%, signal=71%
REACTOME_TERMINATION_OF_TRANSLESION_DNA_SYNTHESIS	REACTOME_TERMINATION_OF_TRANSLESION_DNA_SYNTHESIS		22	-0.435093	-1.33425	0.110442	0.21746	1	1553	tags=45%, list=18%, signal=55%
REACTOME_ION_TRANSPORT_BY_P_TYPE_ATPASES	REACTOME_ION_TRANSPORT_BY_P_TYPE_ATPASES		32	-0.384958	-1.32995	0.0989474	0.22139	1	1409	tags=34%, list=16%, signal=41%
REACTOME_TRISTETRAPROLIN_TTP_ZFP36_BINDS_AND_DESTABILIZES_MRNA	REACTOME_TRISTETRAPROLIN_TTP_ZFP36_BINDS_AND_DESTABILIZES_MRNA		16	-0.469469	-1.32468	0.148536	0.226997	1	3730	tags=75%, list=44%, signal=133%
REACTOME_DNA_DAMAGE_BYPASS	REACTOME_DNA_DAMAGE_BYPASS		34	-0.376612	-1.32384	0.0840336	0.226961	1	1553	tags=35%, list=18%, signal=43%
REACTOME_PTEN_REGULATION	REACTOME_PTEN_REGULATION		114	-0.292779	-1.32301	0.0582011	0.226757	1	2452	tags=33%, list=29%, signal=46%
REACTOME_RESPIRATORY_ELECTRON_TRANSPORT	REACTOME_RESPIRATORY_ELECTRON_TRANSPORT		84	-0.307399	-1.32177	0.0509709	0.227313	1	794	tags=15%, list=9%, signal=17%
REACTOME_METABOLISM_OF_VITAMINS_AND_COFACTORS	REACTOME_METABOLISM_OF_VITAMINS_AND_COFACTORS		133	-0.285789	-1.31736	0.0451128	0.231878	1	1510	tags=29%, list=18%, signal=35%
REACTOME_ADP_SIGNALLING_THROUGH_P2Y_PURINOCEPTOR_1	REACTOME_ADP_SIGNALLING_THROUGH_P2Y_PURINOCEPTOR_1		17	-0.445134	-1.31355	0.146138	0.235633	1	2148	tags=41%, list=25%, signal=55%
REACTOME_GLUTATHIONE_CONJUGATION	REACTOME_GLUTATHIONE_CONJUGATION		26	-0.404143	-1.31023	0.127803	0.238914	1	2743	tags=54%, list=32%, signal=79%
REACTOME_SYNTHESIS_OF_PA	REACTOME_SYNTHESIS_OF_PA		25	-0.397975	-1.30622	0.133612	0.24316	1	990	tags=20%, list=12%, signal=23%
REACTOME_METABOLISM_OF_WATER_SOLUBLE_VITAMINS_AND_COFACTORS	REACTOME_METABOLISM_OF_WATER_SOLUBLE_VITAMINS_AND_COFACTORS		85	-0.304992	-1.29639	0.0642857	0.25525	1	1078	tags=24%, list=13%, signal=27%
REACTOME_MITOTIC_G2_G2_M_PHASES	REACTOME_MITOTIC_G2_G2_M_PHASES		144	-0.277618	-1.29356	0.0380711	0.257941	1	1994	tags=22%, list=23%, signal=28%
REACTOME_GABA_B_RECEPTOR_ACTIVATION	REACTOME_GABA_B_RECEPTOR_ACTIVATION		18	-0.430312	-1.29351	0.145652	0.256798	1	3210	tags=56%, list=37%, signal=89%
REACTOME_GLUCAGON_SIGNALING_IN_METABOLIC_REGULATION	REACTOME_GLUCAGON_SIGNALING_IN_METABOLIC_REGULATION		21	-0.420453	-1.29105	0.14128	0.258954	1	2148	tags=43%, list=25%, signal=57%
REACTOME_INTRINSIC_PATHWAY_FOR_APOPTOSIS	REACTOME_INTRINSIC_PATHWAY_FOR_APOPTOSIS		42	-0.355623	-1.28659	0.129545	0.264044	1	1901	tags=38%, list=22%, signal=49%
REACTOME_G_ALPHA_S_SIGNALLING_EVENTS	REACTOME_G_ALPHA_S_SIGNALLING_EVENTS		37	-0.354058	-1.28386	0.131222	0.266678	1	2148	tags=32%, list=25%, signal=43%
REACTOME_CELLULAR_RESPONSE_TO_STARVATION	REACTOME_CELLULAR_RESPONSE_TO_STARVATION		120	-0.287602	-1.27744	0.0630631	0.274853	1	2125	tags=39%, list=25%, signal=51%
REACTOME_DNA_DAMAGE_RECOGNITION_IN_GG_NER	REACTOME_DNA_DAMAGE_RECOGNITION_IN_GG_NER		30	-0.369871	-1.27069	0.15708	0.283806	1	2744	tags=37%, list=32%, signal=54%
REACTOME_TRANSCRIPTIONAL_REGULATION_OF_GRANULOPOIESIS	REACTOME_TRANSCRIPTIONAL_REGULATION_OF_GRANULOPOIESIS		23	-0.403511	-1.2693	0.159184	0.284733	1	2106	tags=48%, list=25%, signal=63%
REACTOME_PROTEIN_UBIQUITINATION	REACTOME_PROTEIN_UBIQUITINATION		50	-0.330607	-1.26442	0.12212	0.29133	1	2672	tags=46%, list=31%, signal=66%
REACTOME_G_PROTEIN_MEDIATED_EVENTS	REACTOME_G_PROTEIN_MEDIATED_EVENTS		40	-0.346334	-1.26285	0.131696	0.292419	1	2261	tags=38%, list=26%, signal=51%
REACTOME_DEUBIQUITINATION	REACTOME_DEUBIQUITINATION		180	-0.265807	-1.26032	0.0473684	0.295026	1	2008	tags=23%, list=23%, signal=30%
REACTOME_SMAD2_SMAD3_SMAD4_HETEROTRIMER_REGULATES_TRANSCRIPTION	REACTOME_SMAD2_SMAD3_SMAD4_HETEROTRIMER_REGULATES_TRANSCRIPTION		18	-0.4136	-1.25678	0.172043	0.299125	1	2303	tags=44%, list=27%, signal=61%
REACTOME_FC_EPSILON_RECEPTOR_FCERI_SIGNALING	REACTOME_FC_EPSILON_RECEPTOR_FCERI_SIGNALING		112	-0.281095	-1.25635	0.0799087	0.298449	1	532	tags=9%, list=6%, signal=9%
REACTOME_ANCHORING_OF_THE_BASAL_BODY_TO_THE_PLASMA_MEMBRANE	REACTOME_ANCHORING_OF_THE_BASAL_BODY_TO_THE_PLASMA_MEMBRANE		60	-0.316007	-1.25609	0.128736	0.297461	1	2101	tags=30%, list=25%, signal=39%
REACTOME_REPRODUCTION	REACTOME_REPRODUCTION		41	-0.342598	-1.2534	0.12933	0.300438	1	1604	tags=34%, list=19%, signal=42%
REACTOME_DIGESTION_AND_ABSORPTION	REACTOME_DIGESTION_AND_ABSORPTION		17	-0.410935	-1.25139	0.182418	0.302516	1	901	tags=47%, list=11%, signal=52%
REACTOME_METABOLIC_DISORDERS_OF_BIOLOGICAL_OXIDATION_ENZYMES	REACTOME_METABOLIC_DISORDERS_OF_BIOLOGICAL_OXIDATION_ENZYMES		18	-0.419813	-1.25099	0.165272	0.301727	1	2705	tags=56%, list=32%, signal=81%
REACTOME_DNA_REPAIR	REACTOME_DNA_REPAIR		183	-0.259004	-1.24082	0.0645161	0.316714	1	1823	tags=26%, list=21%, signal=33%
REACTOME_SIGNALING_BY_TGF_BETA_RECEPTOR_COMPLEX	REACTOME_SIGNALING_BY_TGF_BETA_RECEPTOR_COMPLEX		52	-0.320613	-1.23934	0.15859	0.317822	1	2561	tags=42%, list=30%, signal=60%
REACTOME_TRANSCRIPTIONAL_REGULATION_BY_RUNX1	REACTOME_TRANSCRIPTIONAL_REGULATION_BY_RUNX1		135	-0.268725	-1.23826	0.0837563	0.318057	1	2389	tags=34%, list=28%, signal=47%
REACTOME_CD209_DC_SIGN_SIGNALING	REACTOME_CD209_DC_SIGN_SIGNALING		18	-0.399012	-1.23159	0.195426	0.327849	1	2146	tags=39%, list=25%, signal=52%
REACTOME_RAF_ACTIVATION	REACTOME_RAF_ACTIVATION		32	-0.354353	-1.23037	0.170901	0.328389	1	3037	tags=56%, list=35%, signal=87%
REACTOME_PHASE_I_FUNCTIONALIZATION_OF_COMPOUNDS	REACTOME_PHASE_I_FUNCTIONALIZATION_OF_COMPOUNDS		57	-0.31176	-1.2293	0.146552	0.328853	1	815	tags=19%, list=10%, signal=21%
REACTOME_MRNA_DECAY_BY_3_TO_5_EXORIBONUCLEASE	REACTOME_MRNA_DECAY_BY_3_TO_5_EXORIBONUCLEASE		16	-0.426484	-1.22925	0.204301	0.327503	1	2605	tags=38%, list=30%, signal=54%
REACTOME_CA2_PATHWAY	REACTOME_CA2_PATHWAY		40	-0.336631	-1.22874	0.148315	0.326915	1	2265	tags=35%, list=26%, signal=47%
REACTOME_SIGNALING_BY_WNT	REACTOME_SIGNALING_BY_WNT		177	-0.257258	-1.22848	0.0510204	0.325945	1	2667	tags=34%, list=31%, signal=48%
REACTOME_ADORA2B_MEDIATED_ANTI_INFLAMMATORY_CYTOKINES_PRODUCTION	REACTOME_ADORA2B_MEDIATED_ANTI_INFLAMMATORY_CYTOKINES_PRODUCTION		29	-0.360983	-1.22818	0.151448	0.325013	1	2148	tags=38%, list=25%, signal=50%
REACTOME_SYNTHESIS_OF_ACTIVE_UBIQUITIN_ROLES_OF_E1_AND_E2_ENZYMES	REACTOME_SYNTHESIS_OF_ACTIVE_UBIQUITIN_ROLES_OF_E1_AND_E2_ENZYMES		21	-0.392945	-1.22719	0.182844	0.325317	1	1173	tags=24%, list=14%, signal=28%
REACTOME_MITOCHONDRIAL_BIOGENESIS	REACTOME_MITOCHONDRIAL_BIOGENESIS		69	-0.299193	-1.22538	0.113636	0.32708	1	1640	tags=28%, list=19%, signal=34%
REACTOME_SEPARATION_OF_SISTER_CHROMATIDS	REACTOME_SEPARATION_OF_SISTER_CHROMATIDS		134	-0.267045	-1.22319	0.0885168	0.32917	1	2219	tags=25%, list=26%, signal=34%
REACTOME_INTERLEUKIN_1_FAMILY_SIGNALING	REACTOME_INTERLEUKIN_1_FAMILY_SIGNALING		104	-0.276448	-1.22245	0.0970655	0.329002	1	861	tags=13%, list=10%, signal=14%
REACTOME_BETA_CATENIN_INDEPENDENT_WNT_SIGNALING	REACTOME_BETA_CATENIN_INDEPENDENT_WNT_SIGNALING		106	-0.27798	-1.22195	0.1075	0.328481	1	2265	tags=23%, list=26%, signal=30%
REACTOME_ASSOCIATION_OF_TRIC_CCT_WITH_TARGET_PROTEINS_DURING_BIOSYNTHESIS	REACTOME_ASSOCIATION_OF_TRIC_CCT_WITH_TARGET_PROTEINS_DURING_BIOSYNTHESIS		27	-0.365884	-1.21874	0.185185	0.332609	1	1668	tags=33%, list=19%, signal=41%
REACTOME_MHC_CLASS_II_ANTIGEN_PRESENTATION	REACTOME_MHC_CLASS_II_ANTIGEN_PRESENTATION		94	-0.282878	-1.2153	0.117073	0.337049	1	961	tags=17%, list=11%, signal=19%
REACTOME_REGULATION_OF_PTEN_GENE_TRANSCRIPTION	REACTOME_REGULATION_OF_PTEN_GENE_TRANSCRIPTION		45	-0.323545	-1.20625	0.178022	0.350984	1	2093	tags=44%, list=24%, signal=59%
REACTOME_SYNTHESIS_OF_PC	REACTOME_SYNTHESIS_OF_PC		21	-0.38589	-1.20613	0.2	0.349691	1	1571	tags=38%, list=18%, signal=47%
REACTOME_AURKA_ACTIVATION_BY_TPX2	REACTOME_AURKA_ACTIVATION_BY_TPX2		55	-0.308369	-1.20427	0.163121	0.35157	1	1987	tags=29%, list=23%, signal=38%
REACTOME_VEGFR2_MEDIATED_CELL_PROLIFERATION	REACTOME_VEGFR2_MEDIATED_CELL_PROLIFERATION		18	-0.39713	-1.20408	0.208955	0.350395	1	1342	tags=22%, list=16%, signal=26%
REACTOME_MAPK_TARGETS_NUCLEAR_EVENTS_MEDIATED_BY_MAP_KINASES	REACTOME_MAPK_TARGETS_NUCLEAR_EVENTS_MEDIATED_BY_MAP_KINASES		23	-0.383449	-1.20038	0.1939	0.35566	1	3362	tags=57%, list=39%, signal=93%
REACTOME_GLOBAL_GENOME_NUCLEOTIDE_EXCISION_REPAIR_GG_NER	REACTOME_GLOBAL_GENOME_NUCLEOTIDE_EXCISION_REPAIR_GG_NER		67	-0.29709	-1.1995	0.185	0.355837	1	2234	tags=33%, list=26%, signal=44%
REACTOME_TRANSCRIPTIONAL_REGULATION_BY_RUNX3	REACTOME_TRANSCRIPTIONAL_REGULATION_BY_RUNX3		74	-0.28898	-1.19851	0.118056	0.35623	1	353	tags=8%, list=4%, signal=8%
REACTOME_HDR_THROUGH_HOMOLOGOUS_RECOMBINATION_HRR	REACTOME_HDR_THROUGH_HOMOLOGOUS_RECOMBINATION_HRR		28	-0.359111	-1.1956	0.19457	0.360277	1	1553	tags=32%, list=18%, signal=39%
REACTOME_MITOCHONDRIAL_FATTY_ACID_BETA_OXIDATION	REACTOME_MITOCHONDRIAL_FATTY_ACID_BETA_OXIDATION		31	-0.348878	-1.1953	0.210526	0.359351	1	2615	tags=55%, list=31%, signal=79%
REACTOME_NEUROTRANSMITTER_RECEPTORS_AND_POSTSYNAPTIC_SIGNAL_TRANSMISSION	REACTOME_NEUROTRANSMITTER_RECEPTORS_AND_POSTSYNAPTIC_SIGNAL_TRANSMISSION		92	-0.276575	-1.19305	0.144254	0.36213	1	2278	tags=32%, list=27%, signal=42%
REACTOME_PEROXISOMAL_LIPID_METABOLISM	REACTOME_PEROXISOMAL_LIPID_METABOLISM		26	-0.366982	-1.18937	0.212944	0.3677	1	1671	tags=31%, list=20%, signal=38%
REACTOME_METABOLISM_OF_NUCLEOTIDES	REACTOME_METABOLISM_OF_NUCLEOTIDES		76	-0.282954	-1.18776	0.146396	0.369073	1	1385	tags=25%, list=16%, signal=30%
REACTOME_PYROPTOSIS	REACTOME_PYROPTOSIS		17	-0.404661	-1.18531	0.227926	0.372012	1	761	tags=29%, list=9%, signal=32%
REACTOME_TP53_REGULATES_TRANSCRIPTION_OF_DNA_REPAIR_GENES	REACTOME_TP53_REGULATES_TRANSCRIPTION_OF_DNA_REPAIR_GENES		45	-0.311589	-1.18348	0.194064	0.373975	1	1801	tags=24%, list=21%, signal=31%
REACTOME_INTERFERON_GAMMA_SIGNALING	REACTOME_INTERFERON_GAMMA_SIGNALING		51	-0.312632	-1.18299	0.168539	0.373504	1	813	tags=22%, list=9%, signal=24%
REACTOME_BUTYRATE_RESPONSE_FACTOR_1_BRF1_BINDS_AND_DESTABILIZES_MRNA	REACTOME_BUTYRATE_RESPONSE_FACTOR_1_BRF1_BINDS_AND_DESTABILIZES_MRNA		17	-0.40946	-1.17956	0.259875	0.378699	1	3730	tags=71%, list=44%, signal=125%
REACTOME_REGULATION_OF_PLK1_ACTIVITY_AT_G2_M_TRANSITION	REACTOME_REGULATION_OF_PLK1_ACTIVITY_AT_G2_M_TRANSITION		63	-0.293726	-1.17187	0.177156	0.391815	1	1987	tags=25%, list=23%, signal=33%
REACTOME_TRIGLYCERIDE_CATABOLISM	REACTOME_TRIGLYCERIDE_CATABOLISM		17	-0.396771	-1.17165	0.248434	0.390594	1	2164	tags=41%, list=25%, signal=55%
REACTOME_CALNEXIN_CALRETICULIN_CYCLE	REACTOME_CALNEXIN_CALRETICULIN_CYCLE		19	-0.385816	-1.16867	0.238193	0.394649	1	2862	tags=42%, list=33%, signal=63%
REACTOME_SENESCENCE_ASSOCIATED_SECRETORY_PHENOTYPE_SASP	REACTOME_SENESCENCE_ASSOCIATED_SECRETORY_PHENOTYPE_SASP		40	-0.317391	-1.16409	0.189732	0.4017	1	2146	tags=30%, list=25%, signal=40%
REACTOME_POST_CHAPERONIN_TUBULIN_FOLDING_PATHWAY	REACTOME_POST_CHAPERONIN_TUBULIN_FOLDING_PATHWAY		18	-0.387694	-1.16055	0.251572	0.406729	1	1512	tags=28%, list=18%, signal=34%
REACTOME_PROCESSING_OF_INTRONLESS_PRE_MRNAS	REACTOME_PROCESSING_OF_INTRONLESS_PRE_MRNAS		19	-0.39144	-1.16041	0.24197	0.405428	1	3855	tags=58%, list=45%, signal=105%
REACTOME_DARPP_32_EVENTS	REACTOME_DARPP_32_EVENTS		19	-0.378528	-1.15763	0.266234	0.409001	1	1987	tags=47%, list=23%, signal=62%
REACTOME_NEURONAL_SYSTEM	REACTOME_NEURONAL_SYSTEM		148	-0.249704	-1.1543	0.151961	0.413938	1	2278	tags=31%, list=27%, signal=42%
REACTOME_NERVOUS_SYSTEM_DEVELOPMENT	REACTOME_NERVOUS_SYSTEM_DEVELOPMENT		412	-0.21936	-1.15356	0.0816327	0.41389	1	2251	tags=30%, list=26%, signal=38%
REACTOME_NEGATIVE_REGULATORS_OF_DDX58_IFIH1_SIGNALING	REACTOME_NEGATIVE_REGULATORS_OF_DDX58_IFIH1_SIGNALING		25	-0.34336	-1.15044	0.241453	0.41835	1	1277	tags=16%, list=15%, signal=19%
REACTOME_METABOLISM_OF_LIPIDS	REACTOME_METABOLISM_OF_LIPIDS		500	-0.212698	-1.14855	0.0490196	0.420844	1	1288	tags=18%, list=15%, signal=20%
REACTOME_INITIATION_OF_NUCLEAR_ENVELOPE_NE_REFORMATION	REACTOME_INITIATION_OF_NUCLEAR_ENVELOPE_NE_REFORMATION		17	-0.388866	-1.14575	0.283401	0.425006	1	2410	tags=53%, list=28%, signal=74%
REACTOME_MEIOTIC_SYNAPSIS	REACTOME_MEIOTIC_SYNAPSIS		25	-0.359554	-1.14574	0.279919	0.423418	1	1604	tags=40%, list=19%, signal=49%
REACTOME_REGULATION_OF_INSULIN_SECRETION	REACTOME_REGULATION_OF_INSULIN_SECRETION		48	-0.2975	-1.14086	0.21729	0.431885	1	2175	tags=38%, list=25%, signal=50%
REACTOME_INTERLEUKIN_1_SIGNALING	REACTOME_INTERLEUKIN_1_SIGNALING		83	-0.266896	-1.13299	0.217184	0.445854	1	465	tags=8%, list=5%, signal=9%
REACTOME_SIGNALING_BY_EGFR_IN_CANCER	REACTOME_SIGNALING_BY_EGFR_IN_CANCER		15	-0.390674	-1.13279	0.293249	0.444643	1	353	tags=13%, list=4%, signal=14%
REACTOME_CONSTITUTIVE_SIGNALING_BY_LIGAND_RESPONSIVE_EGFR_CANCER_VARIANTS	REACTOME_CONSTITUTIVE_SIGNALING_BY_LIGAND_RESPONSIVE_EGFR_CANCER_VARIANTS		15	-0.390674	-1.12842	0.278008	0.451967	1	353	tags=13%, list=4%, signal=14%
REACTOME_TRANSCRIPTION_OF_THE_HIV_GENOME	REACTOME_TRANSCRIPTION_OF_THE_HIV_GENOME		58	-0.286314	-1.12567	0.258216	0.455936	1	1801	tags=22%, list=21%, signal=28%
REACTOME_ESTROGEN_DEPENDENT_GENE_EXPRESSION	REACTOME_ESTROGEN_DEPENDENT_GENE_EXPRESSION		75	-0.27121	-1.12304	0.240175	0.45964	1	2525	tags=35%, list=29%, signal=49%
REACTOME_TRNA_AMINOACYLATION	REACTOME_TRNA_AMINOACYLATION		42	-0.307211	-1.12299	0.262473	0.458072	1	2359	tags=43%, list=28%, signal=59%
REACTOME_SARS_COV_INFECTIONS	REACTOME_SARS_COV_INFECTIONS		116	-0.250052	-1.1216	0.221939	0.459327	1	1739	tags=28%, list=20%, signal=35%
REACTOME_SIGNAL_AMPLIFICATION	REACTOME_SIGNAL_AMPLIFICATION		22	-0.354373	-1.12048	0.277533	0.460011	1	3210	tags=50%, list=37%, signal=80%
REACTOME_DAG_AND_IP3_SIGNALING	REACTOME_DAG_AND_IP3_SIGNALING		29	-0.340588	-1.1165	0.284188	0.466781	1	1871	tags=34%, list=22%, signal=44%
REACTOME_MITOTIC_METAPHASE_AND_ANAPHASE	REACTOME_MITOTIC_METAPHASE_AND_ANAPHASE		174	-0.236442	-1.11569	0.205379	0.466851	1	2220	tags=25%, list=26%, signal=33%
REACTOME_AQUAPORIN_MEDIATED_TRANSPORT	REACTOME_AQUAPORIN_MEDIATED_TRANSPORT		27	-0.3316	-1.11418	0.267094	0.468441	1	2148	tags=37%, list=25%, signal=49%
REACTOME_RHOBTB_GTPASE_CYCLE	REACTOME_RHOBTB_GTPASE_CYCLE		32	-0.323553	-1.11379	0.288747	0.467572	1	2609	tags=50%, list=30%, signal=72%
REACTOME_VASOPRESSIN_REGULATES_RENAL_WATER_HOMEOSTASIS_VIA_AQUAPORINS	REACTOME_VASOPRESSIN_REGULATES_RENAL_WATER_HOMEOSTASIS_VIA_AQUAPORINS		25	-0.336727	-1.11159	0.308793	0.470488	1	2148	tags=36%, list=25%, signal=48%
REACTOME_PLATELET_CALCIUM_HOMEOSTASIS	REACTOME_PLATELET_CALCIUM_HOMEOSTASIS		16	-0.391418	-1.10747	0.333333	0.477671	1	2363	tags=38%, list=28%, signal=52%
REACTOME_PHOSPHORYLATION_OF_THE_APC_C	REACTOME_PHOSPHORYLATION_OF_THE_APC_C		15	-0.400158	-1.10597	0.318658	0.479392	1	2080	tags=27%, list=24%, signal=35%
REACTOME_CA_DEPENDENT_EVENTS	REACTOME_CA_DEPENDENT_EVENTS		26	-0.336852	-1.10359	0.310345	0.482916	1	1871	tags=38%, list=22%, signal=49%
REACTOME_CREB1_PHOSPHORYLATION_THROUGH_NMDA_RECEPTOR_MEDIATED_ACTIVATION_OF_RAS_SIGNALING	REACTOME_CREB1_PHOSPHORYLATION_THROUGH_NMDA_RECEPTOR_MEDIATED_ACTIVATION_OF_RAS_SIGNALING		18	-0.363639	-1.10323	0.322581	0.481935	1	2278	tags=39%, list=27%, signal=53%
REACTOME_NOD1_2_SIGNALING_PATHWAY	REACTOME_NOD1_2_SIGNALING_PATHWAY		28	-0.325866	-1.10238	0.305733	0.481908	1	2151	tags=36%, list=25%, signal=48%
REACTOME_DUAL_INCISION_IN_GG_NER	REACTOME_DUAL_INCISION_IN_GG_NER		32	-0.327158	-1.09694	0.314894	0.492171	1	1727	tags=34%, list=20%, signal=43%
REACTOME_ERK_MAPK_TARGETS	REACTOME_ERK_MAPK_TARGETS		17	-0.373903	-1.09395	0.326693	0.497186	1	3362	tags=59%, list=39%, signal=97%
REACTOME_CELLULAR_RESPONSE_TO_HEAT_STRESS	REACTOME_CELLULAR_RESPONSE_TO_HEAT_STRESS		87	-0.255701	-1.09369	0.270023	0.496059	1	1330	tags=20%, list=16%, signal=23%
REACTOME_TRANSCRIPTIONAL_ACTIVATION_OF_MITOCHONDRIAL_BIOGENESIS	REACTOME_TRANSCRIPTIONAL_ACTIVATION_OF_MITOCHONDRIAL_BIOGENESIS		37	-0.304245	-1.09245	0.321429	0.497227	1	1254	tags=24%, list=15%, signal=28%
REACTOME_TRANSCRIPTIONAL_REGULATION_BY_MECP2	REACTOME_TRANSCRIPTIONAL_REGULATION_BY_MECP2		39	-0.302772	-1.09204	0.31441	0.496527	1	2467	tags=44%, list=29%, signal=61%
REACTOME_NUCLEOTIDE_SALVAGE	REACTOME_NUCLEOTIDE_SALVAGE		18	-0.371336	-1.09166	0.343035	0.495697	1	889	tags=22%, list=10%, signal=25%
REACTOME_G_ALPHA_Z_SIGNALLING_EVENTS	REACTOME_G_ALPHA_Z_SIGNALLING_EVENTS		25	-0.331318	-1.09029	0.331942	0.497158	1	3210	tags=44%, list=37%, signal=70%
REACTOME_DEACTIVATION_OF_THE_BETA_CATENIN_TRANSACTIVATING_COMPLEX	REACTOME_DEACTIVATION_OF_THE_BETA_CATENIN_TRANSACTIVATING_COMPLEX		22	-0.350613	-1.08997	0.330561	0.496294	1	2520	tags=45%, list=29%, signal=64%
REACTOME_GABA_RECEPTOR_ACTIVATION	REACTOME_GABA_RECEPTOR_ACTIVATION		19	-0.355088	-1.08918	0.333333	0.496398	1	3210	tags=53%, list=37%, signal=84%
REACTOME_CLASS_B_2_SECRETIN_FAMILY_RECEPTORS	REACTOME_CLASS_B_2_SECRETIN_FAMILY_RECEPTORS		21	-0.355094	-1.0868	0.325052	0.499723	1	2203	tags=38%, list=26%, signal=51%
REACTOME_TRANSCRIPTIONAL_REGULATION_BY_RUNX2	REACTOME_TRANSCRIPTIONAL_REGULATION_BY_RUNX2		79	-0.263488	-1.08536	0.313084	0.501318	1	465	tags=8%, list=5%, signal=8%
REACTOME_STRIATED_MUSCLE_CONTRACTION	REACTOME_STRIATED_MUSCLE_CONTRACTION		20	-0.359234	-1.08372	0.335417	0.503189	1	2335	tags=55%, list=27%, signal=75%
REACTOME_INTERLEUKIN_37_SIGNALING	REACTOME_INTERLEUKIN_37_SIGNALING		15	-0.376737	-1.08082	0.32449	0.507755	1	784	tags=20%, list=9%, signal=22%
REACTOME_SIGNALING_BY_FGFR2	REACTOME_SIGNALING_BY_FGFR2		49	-0.282615	-1.07516	0.325275	0.518709	1	3299	tags=49%, list=39%, signal=79%
REACTOME_G_ALPHA_12_13_SIGNALLING_EVENTS	REACTOME_G_ALPHA_12_13_SIGNALLING_EVENTS		57	-0.2699	-1.07285	0.327354	0.522159	1	3287	tags=53%, list=38%, signal=85%
REACTOME_DDX58_IFIH1_MEDIATED_INDUCTION_OF_INTERFERON_ALPHA_BETA	REACTOME_DDX58_IFIH1_MEDIATED_INDUCTION_OF_INTERFERON_ALPHA_BETA		52	-0.273099	-1.0718	0.324943	0.522918	1	2146	tags=29%, list=25%, signal=38%
REACTOME_KINESINS	REACTOME_KINESINS		37	-0.29836	-1.07082	0.325942	0.523307	1	1557	tags=30%, list=18%, signal=36%
REACTOME_APOPTOTIC_FACTOR_MEDIATED_RESPONSE	REACTOME_APOPTOTIC_FACTOR_MEDIATED_RESPONSE		18	-0.356964	-1.06375	0.348361	0.537781	1	1502	tags=28%, list=18%, signal=34%
REACTOME_NUCLEOTIDE_EXCISION_REPAIR	REACTOME_NUCLEOTIDE_EXCISION_REPAIR		88	-0.244055	-1.05894	0.33253	0.547148	1	2234	tags=28%, list=26%, signal=38%
REACTOME_ABC_FAMILY_PROTEINS_MEDIATED_TRANSPORT	REACTOME_ABC_FAMILY_PROTEINS_MEDIATED_TRANSPORT		84	-0.249867	-1.05845	0.3486	0.546505	1	1044	tags=13%, list=12%, signal=15%
REACTOME_DNA_DOUBLE_STRAND_BREAK_RESPONSE	REACTOME_DNA_DOUBLE_STRAND_BREAK_RESPONSE		34	-0.303981	-1.05554	0.358917	0.551811	1	2227	tags=35%, list=26%, signal=48%
REACTOME_CYTOSOLIC_TRNA_AMINOACYLATION	REACTOME_CYTOSOLIC_TRNA_AMINOACYLATION		24	-0.335008	-1.05534	0.397463	0.550493	1	2359	tags=50%, list=28%, signal=69%
REACTOME_HIV_TRANSCRIPTION_ELONGATION	REACTOME_HIV_TRANSCRIPTION_ELONGATION		37	-0.295046	-1.05178	0.360587	0.557026	1	1801	tags=22%, list=21%, signal=27%
REACTOME_SIGNALING_BY_FGFR	REACTOME_SIGNALING_BY_FGFR		53	-0.267846	-1.051	0.368534	0.557085	1	3299	tags=49%, list=39%, signal=79%
REACTOME_REGULATION_OF_TP53_ACTIVITY_THROUGH_ACETYLATION	REACTOME_REGULATION_OF_TP53_ACTIVITY_THROUGH_ACETYLATION		27	-0.316793	-1.05065	0.37415	0.556069	1	1661	tags=33%, list=19%, signal=41%
REACTOME_SUMOYLATION_OF_TRANSCRIPTION_COFACTORS	REACTOME_SUMOYLATION_OF_TRANSCRIPTION_COFACTORS		29	-0.31843	-1.04949	0.378685	0.557088	1	1617	tags=24%, list=19%, signal=30%
REACTOME_NUCLEOTIDE_BINDING_DOMAIN_LEUCINE_RICH_REPEAT_CONTAINING_RECEPTOR_NLR_SIGNALING_PATHWAYS	REACTOME_NUCLEOTIDE_BINDING_DOMAIN_LEUCINE_RICH_REPEAT_CONTAINING_RECEPTOR_NLR_SIGNALING_PATHWAYS		44	-0.284233	-1.04861	0.384977	0.557197	1	2151	tags=36%, list=25%, signal=48%
REACTOME_FACTORS_INVOLVED_IN_MEGAKARYOCYTE_DEVELOPMENT_AND_PLATELET_PRODUCTION	REACTOME_FACTORS_INVOLVED_IN_MEGAKARYOCYTE_DEVELOPMENT_AND_PLATELET_PRODUCTION		96	-0.237703	-1.04778	0.342529	0.557499	1	2214	tags=31%, list=26%, signal=42%
REACTOME_M_PHASE	REACTOME_M_PHASE		272	-0.208437	-1.04209	0.313019	0.569181	1	1994	tags=22%, list=23%, signal=28%
REACTOME_INTERCONVERSION_OF_NUCLEOTIDE_DI_AND_TRIPHOSPHATES	REACTOME_INTERCONVERSION_OF_NUCLEOTIDE_DI_AND_TRIPHOSPHATES		22	-0.329355	-1.03548	0.392034	0.583244	1	679	tags=23%, list=8%, signal=25%
REACTOME_TRANSPORT_OF_INORGANIC_CATIONS_ANIONS_AND_AMINO_ACIDS_OLIGOPEPTIDES	REACTOME_TRANSPORT_OF_INORGANIC_CATIONS_ANIONS_AND_AMINO_ACIDS_OLIGOPEPTIDES		44	-0.273447	-1.03046	0.394004	0.593542	1	1387	tags=23%, list=16%, signal=27%
REACTOME_MITOCHONDRIAL_TRNA_AMINOACYLATION	REACTOME_MITOCHONDRIAL_TRNA_AMINOACYLATION		21	-0.332111	-1.02917	0.417012	0.59489	1	2166	tags=38%, list=25%, signal=51%
REACTOME_N_GLYCAN_TRIMMING_IN_THE_ER_AND_CALNEXIN_CALRETICULIN_CYCLE	REACTOME_N_GLYCAN_TRIMMING_IN_THE_ER_AND_CALNEXIN_CALRETICULIN_CYCLE		28	-0.306542	-1.02595	0.41649	0.60079	1	1603	tags=21%, list=19%, signal=26%
REACTOME_HEDGEHOG_OFF_STATE	REACTOME_HEDGEHOG_OFF_STATE		83	-0.240819	-1.0257	0.3903	0.599508	1	465	tags=7%, list=5%, signal=8%
REACTOME_MAPK6_MAPK4_SIGNALING	REACTOME_MAPK6_MAPK4_SIGNALING		72	-0.25091	-1.02455	0.4	0.600454	1	465	tags=8%, list=5%, signal=9%
REACTOME_METALLOPROTEASE_DUBS	REACTOME_METALLOPROTEASE_DUBS		17	-0.357669	-1.02405	0.44958	0.599828	1	1973	tags=35%, list=23%, signal=46%
REACTOME_FORMATION_OF_RNA_POL_II_ELONGATION_COMPLEX	REACTOME_FORMATION_OF_RNA_POL_II_ELONGATION_COMPLEX		50	-0.264815	-1.01942	0.431416	0.609293	1	3006	tags=38%, list=35%, signal=58%
REACTOME_SIGNALING_BY_ERBB2_ECD_MUTANTS	REACTOME_SIGNALING_BY_ERBB2_ECD_MUTANTS		15	-0.372248	-1.01778	0.454352	0.61157	1	353	tags=13%, list=4%, signal=14%
REACTOME_HIV_TRANSCRIPTION_INITIATION	REACTOME_HIV_TRANSCRIPTION_INITIATION		38	-0.280743	-1.01143	0.434043	0.625258	1	1305	tags=18%, list=15%, signal=22%
REACTOME_MYD88_INDEPENDENT_TLR4_CASCADE	REACTOME_MYD88_INDEPENDENT_TLR4_CASCADE		69	-0.246706	-1.0109	0.432609	0.624712	1	2151	tags=32%, list=25%, signal=42%
REACTOME_DNA_DOUBLE_STRAND_BREAK_REPAIR	REACTOME_DNA_DOUBLE_STRAND_BREAK_REPAIR		79	-0.239518	-1.00675	0.394737	0.632987	1	1910	tags=30%, list=22%, signal=39%
REACTOME_ABORTIVE_ELONGATION_OF_HIV_1_TRANSCRIPT_IN_THE_ABSENCE_OF_TAT	REACTOME_ABORTIVE_ELONGATION_OF_HIV_1_TRANSCRIPT_IN_THE_ABSENCE_OF_TAT		21	-0.32719	-1.00492	0.466083	0.635661	1	3006	tags=38%, list=35%, signal=59%
REACTOME_RECYCLING_PATHWAY_OF_L1	REACTOME_RECYCLING_PATHWAY_OF_L1		37	-0.271893	-1.0033	0.422078	0.637832	1	2668	tags=35%, list=31%, signal=51%
REACTOME_SIALIC_ACID_METABOLISM	REACTOME_SIALIC_ACID_METABOLISM		17	-0.341686	-0.999147	0.426752	0.646102	1	872	tags=29%, list=10%, signal=33%
REACTOME_NEDDYLATION	REACTOME_NEDDYLATION		143	-0.215503	-0.99616	0.470738	0.651768	1	515	tags=8%, list=6%, signal=8%
REACTOME_SULFUR_AMINO_ACID_METABOLISM	REACTOME_SULFUR_AMINO_ACID_METABOLISM		24	-0.312569	-0.987133	0.490722	0.672995	1	1184	tags=21%, list=14%, signal=24%
REACTOME_TRAFFICKING_OF_AMPA_RECEPTORS	REACTOME_TRAFFICKING_OF_AMPA_RECEPTORS		17	-0.333325	-0.978869	0.467368	0.692	1	1607	tags=29%, list=19%, signal=36%
REACTOME_GLYCEROPHOSPHOLIPID_BIOSYNTHESIS	REACTOME_GLYCEROPHOSPHOLIPID_BIOSYNTHESIS		83	-0.231283	-0.976223	0.492462	0.696751	1	1380	tags=23%, list=16%, signal=27%
REACTOME_DIGESTION	REACTOME_DIGESTION		15	-0.341763	-0.97478	0.487013	0.698349	1	901	tags=40%, list=11%, signal=45%
REACTOME_ARACHIDONIC_ACID_METABOLISM	REACTOME_ARACHIDONIC_ACID_METABOLISM		38	-0.279256	-0.974532	0.46875	0.696918	1	444	tags=16%, list=5%, signal=17%
REACTOME_RECRUITMENT_OF_MITOTIC_CENTROSOME_PROTEINS_AND_COMPLEXES	REACTOME_RECRUITMENT_OF_MITOTIC_CENTROSOME_PROTEINS_AND_COMPLEXES		61	-0.239009	-0.972816	0.513889	0.699266	1	1987	tags=26%, list=23%, signal=34%
REACTOME_RHOBTB1_GTPASE_CYCLE	REACTOME_RHOBTB1_GTPASE_CYCLE		22	-0.308456	-0.972794	0.502128	0.697254	1	2609	tags=55%, list=30%, signal=78%
REACTOME_HOST_INTERACTIONS_OF_HIV_FACTORS	REACTOME_HOST_INTERACTIONS_OF_HIV_FACTORS		117	-0.217411	-0.971716	0.546117	0.698105	1	540	tags=7%, list=6%, signal=7%
REACTOME_INFLAMMASOMES	REACTOME_INFLAMMASOMES		17	-0.335077	-0.970855	0.466377	0.698191	1	1413	tags=35%, list=16%, signal=42%
REACTOME_SIGNALING_BY_KIT_IN_DISEASE	REACTOME_SIGNALING_BY_KIT_IN_DISEASE		18	-0.32384	-0.964808	0.504566	0.711728	1	3440	tags=61%, list=40%, signal=102%
REACTOME_NUCLEOBASE_CATABOLISM	REACTOME_NUCLEOBASE_CATABOLISM		23	-0.306743	-0.958815	0.514161	0.724998	1	279	tags=13%, list=3%, signal=13%
REACTOME_CRISTAE_FORMATION	REACTOME_CRISTAE_FORMATION		25	-0.294067	-0.958738	0.534188	0.723074	1	1529	tags=24%, list=18%, signal=29%
REACTOME_SIGNALING_BY_ERBB2	REACTOME_SIGNALING_BY_ERBB2		35	-0.26875	-0.955918	0.524887	0.728135	1	3274	tags=49%, list=38%, signal=78%
REACTOME_REGULATION_OF_TP53_EXPRESSION_AND_DEGRADATION	REACTOME_REGULATION_OF_TP53_EXPRESSION_AND_DEGRADATION		24	-0.296992	-0.955372	0.50547	0.72743	1	2437	tags=38%, list=28%, signal=52%
REACTOME_APOPTOTIC_EXECUTION_PHASE	REACTOME_APOPTOTIC_EXECUTION_PHASE		45	-0.255622	-0.95398	0.517167	0.728836	1	821	tags=18%, list=10%, signal=20%
REACTOME_INTERLEUKIN_17_SIGNALING	REACTOME_INTERLEUKIN_17_SIGNALING		47	-0.249387	-0.950361	0.548098	0.735779	1	3589	tags=55%, list=42%, signal=95%
REACTOME_APC_CDC20_MEDIATED_DEGRADATION_OF_NEK2A	REACTOME_APC_CDC20_MEDIATED_DEGRADATION_OF_NEK2A		16	-0.329084	-0.949047	0.544118	0.736882	1	5754	tags=100%, list=67%, signal=304%
REACTOME_INTRACELLULAR_SIGNALING_BY_SECOND_MESSENGERS	REACTOME_INTRACELLULAR_SIGNALING_BY_SECOND_MESSENGERS		210	-0.19276	-0.948319	0.580475	0.736571	1	2527	tags=30%, list=29%, signal=42%
REACTOME_DOWNREGULATION_OF_TGF_BETA_RECEPTOR_SIGNALING	REACTOME_DOWNREGULATION_OF_TGF_BETA_RECEPTOR_SIGNALING		18	-0.31743	-0.947519	0.516411	0.736541	1	2561	tags=44%, list=30%, signal=63%
REACTOME_ORGANELLE_BIOGENESIS_AND_MAINTENANCE	REACTOME_ORGANELLE_BIOGENESIS_AND_MAINTENANCE		196	-0.196294	-0.945631	0.655779	0.739387	1	1770	tags=22%, list=21%, signal=28%
REACTOME_FATTY_ACYL_COA_BIOSYNTHESIS	REACTOME_FATTY_ACYL_COA_BIOSYNTHESIS		21	-0.303297	-0.943285	0.511312	0.743173	1	1285	tags=29%, list=15%, signal=34%
REACTOME_ACTIVATION_OF_NMDA_RECEPTORS_AND_POSTSYNAPTIC_EVENTS	REACTOME_ACTIVATION_OF_NMDA_RECEPTORS_AND_POSTSYNAPTIC_EVENTS		56	-0.241938	-0.940409	0.543624	0.748496	1	1640	tags=23%, list=19%, signal=29%
REACTOME_ANTIGEN_PROCESSING_UBIQUITINATION_PROTEASOME_DEGRADATION	REACTOME_ANTIGEN_PROCESSING_UBIQUITINATION_PROTEASOME_DEGRADATION		188	-0.193325	-0.939118	0.621891	0.749751	1	2173	tags=23%, list=25%, signal=31%
REACTOME_INHIBITION_OF_THE_PROTEOLYTIC_ACTIVITY_OF_APC_C_REQUIRED_FOR_THE_ONSET_OF_ANAPHASE_BY_MITOTIC_SPINDLE_CHECKPOINT_COMPONENTS	REACTOME_INHIBITION_OF_THE_PROTEOLYTIC_ACTIVITY_OF_APC_C_REQUIRED_FOR_THE_ONSET_OF_ANAPHASE_BY_MITOTIC_SPINDLE_CHECKPOINT_COMPONENTS		15	-0.329046	-0.923043	0.541841	0.789227	1	5754	tags=100%, list=67%, signal=304%
REACTOME_APC_C_CDC20_MEDIATED_DEGRADATION_OF_CYCLIN_B	REACTOME_APC_C_CDC20_MEDIATED_DEGRADATION_OF_CYCLIN_B		15	-0.329046	-0.920797	0.534676	0.792721	1	5754	tags=100%, list=67%, signal=304%
REACTOME_ASPARAGINE_N_LINKED_GLYCOSYLATION	REACTOME_ASPARAGINE_N_LINKED_GLYCOSYLATION		232	-0.187475	-0.92013	0.703297	0.79211	1	872	tags=13%, list=10%, signal=14%
REACTOME_SIGNALING_BY_HEDGEHOG	REACTOME_SIGNALING_BY_HEDGEHOG		100	-0.209814	-0.917505	0.663616	0.796535	1	1395	tags=14%, list=16%, signal=17%
REACTOME_EGR2_AND_SOX10_MEDIATED_INITIATION_OF_SCHWANN_CELL_MYELINATION	REACTOME_EGR2_AND_SOX10_MEDIATED_INITIATION_OF_SCHWANN_CELL_MYELINATION		15	-0.325921	-0.916801	0.562914	0.795892	1	2160	tags=47%, list=25%, signal=62%
REACTOME_RNA_POLYMERASE_II_TRANSCRIBES_SNRNA_GENES	REACTOME_RNA_POLYMERASE_II_TRANSCRIBES_SNRNA_GENES		60	-0.228839	-0.914818	0.622426	0.79859	1	3305	tags=38%, list=39%, signal=62%
REACTOME_TRANSCRIPTIONAL_REGULATION_BY_THE_AP_2_TFAP2_FAMILY_OF_TRANSCRIPTION_FACTORS	REACTOME_TRANSCRIPTIONAL_REGULATION_BY_THE_AP_2_TFAP2_FAMILY_OF_TRANSCRIPTION_FACTORS		16	-0.322863	-0.914789	0.584245	0.796468	1	2070	tags=44%, list=24%, signal=58%
REACTOME_G_PROTEIN_BETA_GAMMA_SIGNALLING	REACTOME_G_PROTEIN_BETA_GAMMA_SIGNALLING		25	-0.279713	-0.912099	0.570513	0.800726	1	2148	tags=28%, list=25%, signal=37%
REACTOME_RND3_GTPASE_CYCLE	REACTOME_RND3_GTPASE_CYCLE		34	-0.257082	-0.911251	0.619835	0.800649	1	1075	tags=18%, list=13%, signal=20%
REACTOME_TP53_REGULATES_TRANSCRIPTION_OF_CELL_CYCLE_GENES	REACTOME_TP53_REGULATES_TRANSCRIPTION_OF_CELL_CYCLE_GENES		28	-0.275852	-0.910047	0.617904	0.801387	1	2075	tags=39%, list=24%, signal=52%
REACTOME_DISORDERS_OF_TRANSMEMBRANE_TRANSPORTERS	REACTOME_DISORDERS_OF_TRANSMEMBRANE_TRANSPORTERS		125	-0.198735	-0.905651	0.681592	0.809689	1	1079	tags=11%, list=13%, signal=13%
REACTOME_SIGNALING_BY_NOTCH	REACTOME_SIGNALING_BY_NOTCH		132	-0.197805	-0.903892	0.710997	0.81156	1	1224	tags=14%, list=14%, signal=16%
REACTOME_SIGNALING_BY_ERBB2_IN_CANCER	REACTOME_SIGNALING_BY_ERBB2_IN_CANCER		17	-0.303492	-0.899489	0.619433	0.820082	1	1150	tags=18%, list=13%, signal=20%
REACTOME_REGULATION_OF_MECP2_EXPRESSION_AND_ACTIVITY	REACTOME_REGULATION_OF_MECP2_EXPRESSION_AND_ACTIVITY		27	-0.268694	-0.898585	0.620915	0.820024	1	2467	tags=41%, list=29%, signal=57%
REACTOME_HCMV_EARLY_EVENTS	REACTOME_HCMV_EARLY_EVENTS		71	-0.218778	-0.898292	0.663657	0.818516	1	1640	tags=21%, list=19%, signal=26%
REACTOME_NUCLEOBASE_BIOSYNTHESIS	REACTOME_NUCLEOBASE_BIOSYNTHESIS		15	-0.312739	-0.897376	0.590814	0.818659	1	2427	tags=67%, list=28%, signal=93%
REACTOME_LYSOSOME_VESICLE_BIOGENESIS	REACTOME_LYSOSOME_VESICLE_BIOGENESIS		28	-0.268799	-0.896554	0.6122	0.818187	1	274	tags=11%, list=3%, signal=11%
REACTOME_REGULATED_NECROSIS	REACTOME_REGULATED_NECROSIS		39	-0.242401	-0.893905	0.673684	0.822275	1	761	tags=18%, list=9%, signal=20%
REACTOME_REGULATION_OF_HSF1_MEDIATED_HEAT_SHOCK_RESPONSE	REACTOME_REGULATION_OF_HSF1_MEDIATED_HEAT_SHOCK_RESPONSE		70	-0.219582	-0.890289	0.673966	0.82848	1	1301	tags=17%, list=15%, signal=20%
REACTOME_TRANSLOCATION_OF_SLC2A4_GLUT4_TO_THE_PLASMA_MEMBRANE	REACTOME_TRANSLOCATION_OF_SLC2A4_GLUT4_TO_THE_PLASMA_MEMBRANE		60	-0.221313	-0.888458	0.677804	0.830427	1	1770	tags=22%, list=21%, signal=27%
REACTOME_SIGNALING_BY_EGFR	REACTOME_SIGNALING_BY_EGFR		37	-0.250152	-0.881813	0.656388	0.843953	1	1261	tags=16%, list=15%, signal=19%
REACTOME_PEROXISOMAL_PROTEIN_IMPORT	REACTOME_PEROXISOMAL_PROTEIN_IMPORT		51	-0.227535	-0.880595	0.686047	0.844356	1	2105	tags=29%, list=25%, signal=39%
REACTOME_ACTIVATED_TAK1_MEDIATES_P38_MAPK_ACTIVATION	REACTOME_ACTIVATED_TAK1_MEDIATES_P38_MAPK_ACTIVATION		17	-0.303676	-0.878983	0.628009	0.845751	1	1575	tags=35%, list=18%, signal=43%
REACTOME_SEMA4D_IN_SEMAPHORIN_SIGNALING	REACTOME_SEMA4D_IN_SEMAPHORIN_SIGNALING		22	-0.278711	-0.86671	0.653527	0.871754	1	3287	tags=55%, list=38%, signal=88%
REACTOME_RHO_GTPASES_ACTIVATE_ROCKS	REACTOME_RHO_GTPASES_ACTIVATE_ROCKS		18	-0.295666	-0.865581	0.644681	0.871942	1	3287	tags=56%, list=38%, signal=90%
REACTOME_E3_UBIQUITIN_LIGASES_UBIQUITINATE_TARGET_PROTEINS	REACTOME_E3_UBIQUITIN_LIGASES_UBIQUITINATE_TARGET_PROTEINS		33	-0.248607	-0.865533	0.709328	0.869731	1	2962	tags=52%, list=35%, signal=78%
REACTOME_RESOLUTION_OF_SISTER_CHROMATID_COHESION	REACTOME_RESOLUTION_OF_SISTER_CHROMATID_COHESION		79	-0.201936	-0.858348	0.743276	0.883523	1	1987	tags=28%, list=23%, signal=36%
REACTOME_FOXO_MEDIATED_TRANSCRIPTION	REACTOME_FOXO_MEDIATED_TRANSCRIPTION		37	-0.235692	-0.855355	0.70989	0.887787	1	2303	tags=41%, list=27%, signal=55%
REACTOME_ANTI_INFLAMMATORY_RESPONSE_FAVOURING_LEISHMANIA_PARASITE_INFECTION	REACTOME_ANTI_INFLAMMATORY_RESPONSE_FAVOURING_LEISHMANIA_PARASITE_INFECTION		58	-0.215036	-0.85074	0.778761	0.895684	1	2247	tags=33%, list=26%, signal=44%
REACTOME_RHOJ_GTPASE_CYCLE	REACTOME_RHOJ_GTPASE_CYCLE		51	-0.220348	-0.848383	0.746725	0.898333	1	1760	tags=24%, list=21%, signal=29%
REACTOME_ESR_MEDIATED_SIGNALING	REACTOME_ESR_MEDIATED_SIGNALING		127	-0.18465	-0.845858	0.821608	0.901428	1	2525	tags=31%, list=29%, signal=44%
REACTOME_RAB_GERANYLGERANYLATION	REACTOME_RAB_GERANYLGERANYLATION		48	-0.216146	-0.845741	0.751708	0.899353	1	1579	tags=25%, list=18%, signal=30%
REACTOME_SEMA4D_INDUCED_CELL_MIGRATION_AND_GROWTH_CONE_COLLAPSE	REACTOME_SEMA4D_INDUCED_CELL_MIGRATION_AND_GROWTH_CONE_COLLAPSE		18	-0.280884	-0.839449	0.719149	0.910089	1	3287	tags=56%, list=38%, signal=90%
REACTOME_TRANSCRIPTION_COUPLED_NUCLEOTIDE_EXCISION_REPAIR_TC_NER	REACTOME_TRANSCRIPTION_COUPLED_NUCLEOTIDE_EXCISION_REPAIR_TC_NER		65	-0.206069	-0.839179	0.792411	0.908281	1	1649	tags=20%, list=19%, signal=25%
REACTOME_SYNTHESIS_OF_PIPS_AT_THE_EARLY_ENDOSOME_MEMBRANE	REACTOME_SYNTHESIS_OF_PIPS_AT_THE_EARLY_ENDOSOME_MEMBRANE		16	-0.285844	-0.834404	0.668094	0.915658	1	273	tags=13%, list=3%, signal=13%
REACTOME_RHO_GTPASES_ACTIVATE_IQGAPS	REACTOME_RHO_GTPASES_ACTIVATE_IQGAPS		24	-0.252463	-0.829713	0.74	0.922616	1	1512	tags=21%, list=18%, signal=25%
REACTOME_RNA_POLYMERASE_I_TRANSCRIPTION_TERMINATION	REACTOME_RNA_POLYMERASE_I_TRANSCRIPTION_TERMINATION		24	-0.260591	-0.829295	0.699187	0.921085	1	3006	tags=38%, list=35%, signal=58%
REACTOME_RECRUITMENT_OF_NUMA_TO_MITOTIC_CENTROSOMES	REACTOME_RECRUITMENT_OF_NUMA_TO_MITOTIC_CENTROSOMES		70	-0.201867	-0.828862	0.820331	0.919497	1	1987	tags=23%, list=23%, signal=30%
REACTOME_CIRCADIAN_CLOCK	REACTOME_CIRCADIAN_CLOCK		41	-0.229853	-0.828084	0.776018	0.918711	1	1283	tags=22%, list=15%, signal=26%
REACTOME_MITOTIC_PROMETAPHASE	REACTOME_MITOTIC_PROMETAPHASE		138	-0.179095	-0.820641	0.9022	0.930692	1	1987	tags=24%, list=23%, signal=31%
REACTOME_MITOTIC_SPINDLE_CHECKPOINT	REACTOME_MITOTIC_SPINDLE_CHECKPOINT		70	-0.198041	-0.814732	0.825581	0.939394	1	2512	tags=33%, list=29%, signal=46%
REACTOME_AGGREPHAGY	REACTOME_AGGREPHAGY		30	-0.237451	-0.803726	0.764092	0.956721	1	1512	tags=23%, list=18%, signal=28%
REACTOME_SIGNALING_BY_NUCLEAR_RECEPTORS	REACTOME_SIGNALING_BY_NUCLEAR_RECEPTORS		177	-0.16293	-0.794553	0.966921	0.970421	1	2303	tags=28%, list=27%, signal=38%
REACTOME_RHO_GTPASES_ACTIVATE_CIT	REACTOME_RHO_GTPASES_ACTIVATE_CIT		15	-0.276356	-0.793884	0.751579	0.969097	1	405	tags=13%, list=5%, signal=14%
REACTOME_PLATELET_SENSITIZATION_BY_LDL	REACTOME_PLATELET_SENSITIZATION_BY_LDL		16	-0.274153	-0.790707	0.737179	0.971569	1	3362	tags=56%, list=39%, signal=92%
REACTOME_NETRIN_1_SIGNALING	REACTOME_NETRIN_1_SIGNALING		29	-0.236814	-0.789334	0.775824	0.971364	1	1760	tags=21%, list=21%, signal=26%
REACTOME_CYCLIN_D_ASSOCIATED_EVENTS_IN_G1	REACTOME_CYCLIN_D_ASSOCIATED_EVENTS_IN_G1		28	-0.23423	-0.788496	0.792494	0.970323	1	1987	tags=25%, list=23%, signal=32%
REACTOME_DUAL_INCISION_IN_TC_NER	REACTOME_DUAL_INCISION_IN_TC_NER		52	-0.199775	-0.783349	0.86052	0.976328	1	1649	tags=21%, list=19%, signal=26%
REACTOME_TNF_SIGNALING	REACTOME_TNF_SIGNALING		33	-0.222053	-0.782419	0.823266	0.975346	1	6673	tags=100%, list=78%, signal=451%
REACTOME_THROMBIN_SIGNALLING_THROUGH_PROTEINASE_ACTIVATED_RECEPTORS_PARS	REACTOME_THROMBIN_SIGNALLING_THROUGH_PROTEINASE_ACTIVATED_RECEPTORS_PARS		23	-0.244934	-0.781763	0.76618	0.97404	1	2148	tags=35%, list=25%, signal=46%
REACTOME_SIGNALING_BY_NTRKS	REACTOME_SIGNALING_BY_NTRKS		84	-0.185058	-0.778401	0.902613	0.976842	1	2016	tags=23%, list=24%, signal=29%
REACTOME_CARGO_TRAFFICKING_TO_THE_PERICILIARY_MEMBRANE	REACTOME_CARGO_TRAFFICKING_TO_THE_PERICILIARY_MEMBRANE		32	-0.224169	-0.777152	0.830435	0.976406	1	1364	tags=22%, list=16%, signal=26%
REACTOME_L1CAM_INTERACTIONS	REACTOME_L1CAM_INTERACTIONS		85	-0.180257	-0.768215	0.908482	0.98744	1	2549	tags=35%, list=30%, signal=50%
REACTOME_GLUCAGON_LIKE_PEPTIDE_1_GLP1_REGULATES_INSULIN_SECRETION	REACTOME_GLUCAGON_LIKE_PEPTIDE_1_GLP1_REGULATES_INSULIN_SECRETION		27	-0.234723	-0.767437	0.806867	0.986318	1	2148	tags=33%, list=25%, signal=44%
REACTOME_TGF_BETA_RECEPTOR_SIGNALING_ACTIVATES_SMADS	REACTOME_TGF_BETA_RECEPTOR_SIGNALING_ACTIVATES_SMADS		24	-0.238623	-0.767293	0.810591	0.984097	1	2561	tags=38%, list=30%, signal=53%
REACTOME_DOWNREGULATION_OF_ERBB2_SIGNALING	REACTOME_DOWNREGULATION_OF_ERBB2_SIGNALING		16	-0.268488	-0.76588	0.755365	0.983896	1	1608	tags=25%, list=19%, signal=31%
REACTOME_BMAL1_CLOCK_NPAS2_ACTIVATES_CIRCADIAN_GENE_EXPRESSION	REACTOME_BMAL1_CLOCK_NPAS2_ACTIVATES_CIRCADIAN_GENE_EXPRESSION		18	-0.256245	-0.756286	0.800866	0.994681	1	1224	tags=22%, list=14%, signal=26%
REACTOME_DISEASES_OF_MITOTIC_CELL_CYCLE	REACTOME_DISEASES_OF_MITOTIC_CELL_CYCLE		21	-0.244353	-0.754157	0.824675	0.995158	1	2103	tags=24%, list=25%, signal=31%
REACTOME_SIGNALING_BY_PDGFR_IN_DISEASE	REACTOME_SIGNALING_BY_PDGFR_IN_DISEASE		20	-0.246264	-0.749738	0.837782	0.998577	1	3797	tags=60%, list=44%, signal=108%
REACTOME_NEGATIVE_REGULATION_OF_MET_ACTIVITY	REACTOME_NEGATIVE_REGULATION_OF_MET_ACTIVITY		16	-0.262352	-0.74798	0.807775	0.998458	1	856	tags=19%, list=10%, signal=21%
REACTOME_NOTCH1_INTRACELLULAR_DOMAIN_REGULATES_TRANSCRIPTION	REACTOME_NOTCH1_INTRACELLULAR_DOMAIN_REGULATES_TRANSCRIPTION		26	-0.230058	-0.744413	0.84	1	1	3060	tags=38%, list=36%, signal=60%
REACTOME_ACTIVATION_OF_AMPK_DOWNSTREAM_OF_NMDARS	REACTOME_ACTIVATION_OF_AMPK_DOWNSTREAM_OF_NMDARS		21	-0.24051	-0.744341	0.838983	0.998256	1	1512	tags=24%, list=18%, signal=29%
REACTOME_DEADENYLATION_DEPENDENT_MRNA_DECAY	REACTOME_DEADENYLATION_DEPENDENT_MRNA_DECAY		54	-0.192143	-0.743374	0.922049	0.996958	1	2611	tags=26%, list=30%, signal=37%
REACTOME_CTLA4_INHIBITORY_SIGNALING	REACTOME_CTLA4_INHIBITORY_SIGNALING		18	-0.248414	-0.734726	0.801339	1	1	2667	tags=50%, list=31%, signal=72%
REACTOME_COPI_MEDIATED_ANTEROGRADE_TRANSPORT	REACTOME_COPI_MEDIATED_ANTEROGRADE_TRANSPORT		84	-0.17393	-0.731775	0.962529	1	1	3492	tags=44%, list=41%, signal=74%
REACTOME_REGULATION_OF_TNFR1_SIGNALING	REACTOME_REGULATION_OF_TNFR1_SIGNALING		25	-0.221845	-0.718418	0.875	1	1	6673	tags=100%, list=78%, signal=451%
REACTOME_HIV_INFECTION	REACTOME_HIV_INFECTION		200	-0.146857	-0.71613	0.997238	1	1	845	tags=8%, list=10%, signal=8%
REACTOME_TNFR1_INDUCED_NFKAPPAB_SIGNALING_PATHWAY	REACTOME_TNFR1_INDUCED_NFKAPPAB_SIGNALING_PATHWAY		21	-0.22572	-0.701492	0.883674	1	1	6639	tags=100%, list=77%, signal=443%
REACTOME_BIOSYNTHESIS_OF_SPECIALIZED_PRORESOLVING_MEDIATORS_SPMS	REACTOME_BIOSYNTHESIS_OF_SPECIALIZED_PRORESOLVING_MEDIATORS_SPMS		15	-0.245749	-0.697267	0.859213	1	1	1538	tags=27%, list=18%, signal=32%
REACTOME_COPI_DEPENDENT_GOLGI_TO_ER_RETROGRADE_TRAFFIC	REACTOME_COPI_DEPENDENT_GOLGI_TO_ER_RETROGRADE_TRAFFIC		71	-0.166093	-0.694533	0.959427	1	1	1579	tags=20%, list=18%, signal=24%
REACTOME_SUMOYLATION	REACTOME_SUMOYLATION		115	-0.15373	-0.692941	0.98818	1	1	1617	tags=17%, list=19%, signal=20%
REACTOME_ONCOGENE_INDUCED_SENESCENCE	REACTOME_ONCOGENE_INDUCED_SENESCENCE		18	-0.23328	-0.689735	0.855914	1	1	2265	tags=33%, list=26%, signal=45%
REACTOME_SYNTHESIS_OF_BILE_ACIDS_AND_BILE_SALTS	REACTOME_SYNTHESIS_OF_BILE_ACIDS_AND_BILE_SALTS		25	-0.208266	-0.686975	0.909474	1	1	2459	tags=32%, list=29%, signal=45%
REACTOME_DOWNSTREAM_SIGNAL_TRANSDUCTION	REACTOME_DOWNSTREAM_SIGNAL_TRANSDUCTION		27	-0.212022	-0.686687	0.92	1	1	3276	tags=48%, list=38%, signal=78%
REACTOME_G_BETA_GAMMA_SIGNALLING_THROUGH_PI3KGAMMA	REACTOME_G_BETA_GAMMA_SIGNALLING_THROUGH_PI3KGAMMA		18	-0.22864	-0.685385	0.899554	1	1	2148	tags=28%, list=25%, signal=37%
REACTOME_SEMAPHORIN_INTERACTIONS	REACTOME_SEMAPHORIN_INTERACTIONS		51	-0.176323	-0.67863	0.965142	1	1	3440	tags=51%, list=40%, signal=85%
REACTOME_INTRA_GOLGI_AND_RETROGRADE_GOLGI_TO_ER_TRAFFIC	REACTOME_INTRA_GOLGI_AND_RETROGRADE_GOLGI_TO_ER_TRAFFIC		157	-0.144607	-0.678452	0.989822	1	1	1579	tags=17%, list=18%, signal=20%
REACTOME_GENE_AND_PROTEIN_EXPRESSION_BY_JAK_STAT_SIGNALING_AFTER_INTERLEUKIN_12_STIMULATION	REACTOME_GENE_AND_PROTEIN_EXPRESSION_BY_JAK_STAT_SIGNALING_AFTER_INTERLEUKIN_12_STIMULATION		31	-0.198154	-0.67769	0.939462	1	1	664	tags=10%, list=8%, signal=10%
REACTOME_BILE_ACID_AND_BILE_SALT_METABOLISM	REACTOME_BILE_ACID_AND_BILE_SALT_METABOLISM		30	-0.198549	-0.675134	0.929638	1	1	2459	tags=33%, list=29%, signal=47%
REACTOME_RIPK1_MEDIATED_REGULATED_NECROSIS	REACTOME_RIPK1_MEDIATED_REGULATED_NECROSIS		22	-0.212448	-0.6743	0.900443	1	1	2506	tags=45%, list=29%, signal=64%
REACTOME_INTERLEUKIN_12_SIGNALING	REACTOME_INTERLEUKIN_12_SIGNALING		36	-0.191146	-0.671974	0.941936	1	1	2453	tags=31%, list=29%, signal=43%
REACTOME_HEME_SIGNALING	REACTOME_HEME_SIGNALING		30	-0.196292	-0.667976	0.93047	1	1	1224	tags=20%, list=14%, signal=23%
REACTOME_FORMATION_OF_INCISION_COMPLEX_IN_GG_NER	REACTOME_FORMATION_OF_INCISION_COMPLEX_IN_GG_NER		32	-0.19461	-0.665621	0.948827	1	1	6907	tags=100%, list=81%, signal=514%
REACTOME_NUCLEAR_RECEPTOR_TRANSCRIPTION_PATHWAY	REACTOME_NUCLEAR_RECEPTOR_TRANSCRIPTION_PATHWAY		16	-0.233244	-0.664816	0.888889	1	1	2872	tags=50%, list=34%, signal=75%
REACTOME_SIGNALING_BY_FGFR2_IIIA_TM	REACTOME_SIGNALING_BY_FGFR2_IIIA_TM		17	-0.224916	-0.663215	0.907757	1	1	1305	tags=18%, list=15%, signal=21%
REACTOME_GAP_JUNCTION_TRAFFICKING_AND_REGULATION	REACTOME_GAP_JUNCTION_TRAFFICKING_AND_REGULATION		24	-0.205809	-0.662856	0.930818	1	1	1792	tags=21%, list=21%, signal=26%
REACTOME_DEATH_RECEPTOR_SIGNALLING	REACTOME_DEATH_RECEPTOR_SIGNALLING		100	-0.149906	-0.659628	0.994832	1	1	3256	tags=43%, list=38%, signal=69%
REACTOME_CARBOXYTERMINAL_POST_TRANSLATIONAL_MODIFICATIONS_OF_TUBULIN	REACTOME_CARBOXYTERMINAL_POST_TRANSLATIONAL_MODIFICATIONS_OF_TUBULIN		15	-0.236381	-0.655635	0.928721	1	1	2328	tags=33%, list=27%, signal=46%
REACTOME_FGFR2_MUTANT_RECEPTOR_ACTIVATION	REACTOME_FGFR2_MUTANT_RECEPTOR_ACTIVATION		17	-0.224916	-0.652596	0.902439	1	1	1305	tags=18%, list=15%, signal=21%
REACTOME_TRNA_PROCESSING	REACTOME_TRNA_PROCESSING		89	-0.15043	-0.642852	0.993182	1	1	1160	tags=11%, list=14%, signal=13%
REACTOME_TIE2_SIGNALING	REACTOME_TIE2_SIGNALING		16	-0.219648	-0.633751	0.938144	1	1	784	tags=13%, list=9%, signal=14%
REACTOME_SIGNALING_BY_FGFR2_IN_DISEASE	REACTOME_SIGNALING_BY_FGFR2_IN_DISEASE		27	-0.190813	-0.632846	0.942478	1	1	1305	tags=15%, list=15%, signal=17%
REACTOME_SIGNALING_BY_SCF_KIT	REACTOME_SIGNALING_BY_SCF_KIT		36	-0.179046	-0.630463	0.97907	1	1	3440	tags=53%, list=40%, signal=88%
REACTOME_PYRUVATE_METABOLISM	REACTOME_PYRUVATE_METABOLISM		25	-0.196803	-0.630046	0.952965	1	1	1136	tags=20%, list=13%, signal=23%
REACTOME_NRAGE_SIGNALS_DEATH_THROUGH_JNK	REACTOME_NRAGE_SIGNALS_DEATH_THROUGH_JNK		44	-0.170713	-0.627797	0.979499	1	1	1238	tags=18%, list=14%, signal=21%
REACTOME_TRANSCRIPTIONAL_REGULATION_OF_WHITE_ADIPOCYTE_DIFFERENTIATION	REACTOME_TRANSCRIPTIONAL_REGULATION_OF_WHITE_ADIPOCYTE_DIFFERENTIATION		60	-0.158105	-0.6277	0.987368	1	1	3060	tags=38%, list=36%, signal=59%
REACTOME_CYTOCHROME_P450_ARRANGED_BY_SUBSTRATE_TYPE	REACTOME_CYTOCHROME_P450_ARRANGED_BY_SUBSTRATE_TYPE		24	-0.190309	-0.618985	0.961538	1	1	2593	tags=38%, list=30%, signal=54%
REACTOME_LISTERIA_MONOCYTOGENES_ENTRY_INTO_HOST_CELLS	REACTOME_LISTERIA_MONOCYTOGENES_ENTRY_INTO_HOST_CELLS		16	-0.210965	-0.614945	0.973626	1	1	830	tags=13%, list=10%, signal=14%
REACTOME_FORMATION_OF_THE_EARLY_ELONGATION_COMPLEX	REACTOME_FORMATION_OF_THE_EARLY_ELONGATION_COMPLEX		28	-0.181403	-0.612096	0.96888	1	1	1634	tags=14%, list=19%, signal=18%
REACTOME_NEPHRIN_FAMILY_INTERACTIONS	REACTOME_NEPHRIN_FAMILY_INTERACTIONS		18	-0.204073	-0.598846	0.961783	1	1	659	tags=11%, list=8%, signal=12%
REACTOME_INACTIVATION_OF_CSF3_G_CSF_SIGNALING	REACTOME_INACTIVATION_OF_CSF3_G_CSF_SIGNALING		17	-0.201218	-0.589321	0.967742	1	1	3600	tags=59%, list=42%, signal=101%
REACTOME_SIGNALING_BY_FGFR3	REACTOME_SIGNALING_BY_FGFR3		25	-0.173731	-0.573748	0.976695	1	1	3292	tags=44%, list=38%, signal=71%
REACTOME_MITOCHONDRIAL_PROTEIN_IMPORT	REACTOME_MITOCHONDRIAL_PROTEIN_IMPORT		50	-0.149769	-0.573079	0.990971	1	1	2661	tags=34%, list=31%, signal=49%
REACTOME_RNA_POLYMERASE_III_TRANSCRIPTION_TERMINATION	REACTOME_RNA_POLYMERASE_III_TRANSCRIPTION_TERMINATION		19	-0.187135	-0.568785	0.970021	1	1	378	tags=5%, list=4%, signal=5%
REACTOME_MYOGENESIS	REACTOME_MYOGENESIS		15	-0.198741	-0.560366	0.97397	1	1	3206	tags=47%, list=37%, signal=74%
REACTOME_NUCLEAR_EVENTS_KINASE_AND_TRANSCRIPTION_FACTOR_ACTIVATION	REACTOME_NUCLEAR_EVENTS_KINASE_AND_TRANSCRIPTION_FACTOR_ACTIVATION		32	-0.160479	-0.557418	0.993711	1	1	3362	tags=47%, list=39%, signal=77%
REACTOME_RHO_GTPASES_ACTIVATE_PAKS	REACTOME_RHO_GTPASES_ACTIVATE_PAKS		19	-0.181302	-0.55462	0.977728	1	1	405	tags=11%, list=5%, signal=11%
REACTOME_ASSEMBLY_AND_CELL_SURFACE_PRESENTATION_OF_NMDA_RECEPTORS	REACTOME_ASSEMBLY_AND_CELL_SURFACE_PRESENTATION_OF_NMDA_RECEPTORS		24	-0.170253	-0.550293	0.98996	1	1	2278	tags=25%, list=27%, signal=34%
REACTOME_MRNA_CAPPING	REACTOME_MRNA_CAPPING		25	-0.168438	-0.542497	0.993166	1	1	1305	tags=12%, list=15%, signal=14%
REACTOME_SIGNALING_BY_ERYTHROPOIETIN	REACTOME_SIGNALING_BY_ERYTHROPOIETIN		22	-0.170743	-0.538181	0.989011	1	1	7109	tags=100%, list=83%, signal=586%
REACTOME_RAB_REGULATION_OF_TRAFFICKING	REACTOME_RAB_REGULATION_OF_TRAFFICKING		99	-0.122705	-0.532193	1	1	1	1839	tags=16%, list=21%, signal=20%
REACTOME_SIGNALING_BY_FGFR1	REACTOME_SIGNALING_BY_FGFR1		27	-0.158444	-0.529302	0.989362	1	1	1278	tags=15%, list=15%, signal=17%
REACTOME_VEGFR2_MEDIATED_VASCULAR_PERMEABILITY	REACTOME_VEGFR2_MEDIATED_VASCULAR_PERMEABILITY		24	-0.162106	-0.524385	0.987069	1	1	2405	tags=29%, list=28%, signal=40%
REACTOME_ER_TO_GOLGI_ANTEROGRADE_TRANSPORT	REACTOME_ER_TO_GOLGI_ANTEROGRADE_TRANSPORT		126	-0.112411	-0.518554	1	1	1	2975	tags=31%, list=35%, signal=47%
REACTOME_SIGNALING_BY_FGFR4	REACTOME_SIGNALING_BY_FGFR4		24	-0.149489	-0.479701	0.993435	1	1	3292	tags=42%, list=38%, signal=67%
REACTOME_EPHA_MEDIATED_GROWTH_CONE_COLLAPSE	REACTOME_EPHA_MEDIATED_GROWTH_CONE_COLLAPSE		16	-0.166062	-0.469098	0.991786	1	1	7148	tags=100%, list=83%, signal=603%
REACTOME_RIP_MEDIATED_NFKB_ACTIVATION_VIA_ZBP1	REACTOME_RIP_MEDIATED_NFKB_ACTIVATION_VIA_ZBP1		15	-0.15769	-0.446548	0.993964	0.998845	1	3452	tags=47%, list=40%, signal=78%
